# Supplementary material
Source: PubMed Central journal article supplement (PMC7880313)
Supplement: jci-131-141799-s238.pdf [file jci-131-141799-s238.pdf]

| Probe_Set_ID      | Gene_Accession     | Gene_Symbol | Gene_Description                                                         | Start     | Stop      | transcript_cluster_id | Log FC | p Value  |
|-------------------|--------------------|-------------|--------------------------------------------------------------------------|-----------|-----------|-----------------------|--------|----------|
| TC0100000001.mm.1 | NM_007428          | Agt         | angiotensinogen (serpin peptidase inhibitor, cl                          | 124556534 | 124576893 | TC0800003171.mm.1     | 1.6    | 1.54E-08 |
| TC0100000003.mm.1 | NM_016704          | C6          | complement component 6                                                   | 4727175   | 4815456   | TC1500000014.mm.1     | 1.3    | 7.38E-08 |
| TC0100000008.mm.1 | NM_011957          | Creb3l1     | cAMP responsive element binding protein 3-like                           | 91982328  | 92024502  | TC0200004133.mm.1     | 1.1    | 2.97E-07 |
| TC0100000014.mm.1 | NM_013462          | Adrb3       | adrenergic receptor, beta 3                                              | 27225776  | 27229588  | TC0800001955.mm.1     | 1.2    | 3.41E-07 |
| TC0100000030.mm.1 | NM_173866          | Gpt2        | glutamic pyruvate transaminase (alanine aminot                           | 85492576  | 85527560  | TC0800000991.mm.1     | 1.0    | 4.29E-07 |
| TC0100000031.mm.1 | NM_016667          | Sntb1       | syntrophin, basic 1                                                      | 55638843  | 55906949  | TC1500001544.mm.1     | 2.0    | 4.33E-07 |
| TC0100000034.mm.1 | NM_001033369       | Acvr1c      | activin A receptor, type IC                                              | 58267453  | 58357895  | TC0200003576.mm.1     | 1.7    | 7.92E-07 |
| TC0100000037.mm.1 | ENSMUST00000160126 | Gm454       | predicted gene 454                                                       | 138203609 | 138207308 | TC0500003476.mm.1     | 1.4    | 8.91E-07 |
| TC0100000038.mm.1 | NM_023850          | Chst1       | carbohydrate (keratan sulfate Gal-6) sulfotrans                          | 92599707  | 92615252  | TC0200001441.mm.1     | 1.5    | 1.27E-06 |
| TC0100000039.mm.1 | NM_011977          | Slc27a1     | solute carrier family 27 (fatty acid transporte                          | 71568927  | 71586708  | TC0800000796.mm.1     | 1.3    | 1.63E-06 |
| TC0100000040.mm.1 | NM_001008424       | Cdsn        | corneodesmosin                                                           | 35552128  | 35557180  | TC1700000694.mm.1     | 1.4    | 1.69E-06 |
| TC0100000054.mm.1 | NM_019516          | Lgals12     | lectin, galactose binding, soluble 12                                    | 7596656   | 7607193   | TC1900001051.mm.1     | 2.6    | 1.83E-06 |
| TC0100000059.mm.1 | NM_011395          | Slc22a3     | solute carrier family 22 (organic cation transp                          | 12419972  | 12507704  | TC1700001449.mm.1     | 1.2    | 2.26E-06 |
| TC0100000061.mm.1 | NM_178728          | Napepld     | N-acyl phosphatidylethanolamine phospholipase                            | 21662901  | 21701396  | TC0500002021.mm.1     | 1.3    | 2.78E-06 |
| TC0100000062.mm.1 | NM_009675          | Aoc3        | amine oxidase, copper containing 3                                       | 101330605 | 101341938 | TC1100001651.mm.1     | 2.8    | 2.94E-06 |
| TC0100000064.mm.1 | NM_139292          | Reep6       | receptor accessory protein 6                                             | 80329953  | 80336441  | TC1000000852.mm.1     | 1.5    | 2.95E-06 |
| TC0100000076.mm.1 | uc012bne.1         | Gm5098      | SubName: Full=Putative uncharacterized protein                           | 47262304  | 47264044  | TC1900000720.mm.1     | 0.6    | 4.15E-06 |
| TC0100000081.mm.1 | NM_009252          | Serpina     | serine (or cysteine) peptidase inhibitor, clade                          | 104406708 | 104414329 | TC1200001047.mm.1     | 2.6    | 4.33E-06 |
| TC0100000090.mm.1 | NM_175520          | Gpr81       | G protein-coupled receptor 81                                            | 123876736 | 123880020 | TC0500003244.mm.1     | 1.2    | 4.36E-06 |
| TC0100000092.mm.1 | NM_010128          | Emp1        | epithelial membrane protein 1                                            | 135362931 | 135383173 | TC0600001606.mm.1     | 1.5    | 4.41E-06 |
| TC0100000096.mm.1 | NM_023061          | Mcma        | melanoma cell adhesion molecule                                          | 44134469  | 44142727  | TC0900000500.mm.1     | 1.7    | 4.87E-06 |
| TC0100000103.mm.1 | NM_001114385       | Chrdl1      | chordin-like 1                                                           | 143285674 | 143394262 | TC0X00003113.mm.1     | 1.8    | 5.20E-06 |
| TC0100000112.mm.1 | NM_001166580       | 8430408     | RIKEN cDNA 8430408G22 gene                                               | 116650684 | 116652847 | TC0600001308.mm.1     | 1.0    | 5.37E-06 |
| TC0100000133.mm.1 | NM_008728          | Npr3        | natriuretic peptide receptor 3                                           | 11839896  | 11907371  | TC1500001215.mm.1     | 2.6    | 5.48E-06 |
| TC0100000136.mm.1 | ENSMUST00000121730 | Gm15696     | predicted gene 15696                                                     | 31970362  | 31970806  | TC1600001494.mm.1     | -0.7   | 5.77E-06 |
| TC0100000171.mm.1 | NM_027511          | Hrct1       | histidine rich carboxyl terminus 1                                       | 43727188  | 43728639  | TC0400000450.mm.1     | 0.3    | 5.98E-06 |
| TC0100000184.mm.1 | NM_178405          | Atp1a2      | ATPase, Na <sup>+</sup> /K <sup>+</sup> transporting, alpha 2 polypeptid | 172271709 | 172298064 | TC0100003566.mm.1     | 1.6    | 6.23E-06 |
| TC0100000185.mm.1 | NM_001193309       | Morc4       | microchidia 4                                                            | 139821632 | 139871677 | TC0X00003066.mm.1     | 0.6    | 6.24E-06 |
| TC0100000187.mm.1 | NM_028783          | Robo4       | roundabout homolog 4 (Drosophila)                                        | 37401897  | 37414023  | TC0900000365.mm.1     | 0.6    | 6.33E-06 |
| TC0100000193.mm.1 | NM_001159628       | Heph        | hephaestin                                                               | 96455359  | 96574485  | TC0X00000919.mm.1     | 0.9    | 6.62E-06 |
| TC0100000196.mm.1 | XM_001473099       | Gm10029     | predicted gene 10029                                                     | 6662562   | 6662894   | TC1300001396.mm.1     | -1.1   | 6.81E-06 |
| TC0100000198.mm.1 | NM_008055          | Fzd4        | frizzled homolog 4 (Drosophila)                                          | 89404366  | 89410110  | TC0700001264.mm.1     | 2.5    | 6.90E-06 |
| TC0100000212.mm.1 | NM_019634          | Tspan7      | tetraspanin 7                                                            | 10485116  | 10596605  | TC0X00000126.mm.1     | 1.3    | 7.52E-06 |
| TC0100000213.mm.1 | NM_023587          | Ptp1b       | protein tyrosine phosphatase-like (proline inst                          | 35022421  | 35109175  | TC1600000489.mm.1     | 1.7    | 8.38E-06 |
| TC0100000222.mm.1 | NM_001277756       | Cav2        | caveolin 2                                                               | 17281185  | 17289130  | TC0600000127.mm.1     | 1.9    | 8.52E-06 |
| TC0100000223.mm.1 | ENSMUST00000090395 | Gm10247     | predicted gene 10247                                                     | 8922057   | 8922389   | TC1600001181.mm.1     | -1.2   | 9.60E-06 |
| TC0100000224.mm.1 | NM_027987          | Cd300lg     | CD300 antigen like family member G                                       | 102041509 | 102055620 | TC1100001677.mm.1     | 1.0    | 1.03E-05 |
| TC0100000233.mm.1 | NM_025962          | Mmachc      | methylmalonic aciduria cblC type, with homocys                           | 116702279 | 116708406 | TC0400000349.mm.1     | 0.6    | 1.05E-05 |
| TC0100000237.mm.1 | NM_007473          | Aqp7        | aquaporin 7                                                              | 41033074  | 41048139  | TC0400002455.mm.1     | 2.2    | 1.11E-05 |
| TC0100000251.mm.1 | NM_011979          | Vnn3        | vanin 3                                                                  | 23851462  | 23869843  | TC0800001192.mm.1     | 0.5    | 1.16E-05 |
| TC0100000253.mm.1 | BC057005           | Spry4       | sprouty homolog 4 (Drosophila)                                           | 38586265  | 38601268  | TC1800001234.mm.1     | 0.7    | 1.27E-05 |
| TC0100000255.mm.1 | NM_001113404       | Tshr        | thyroid stimulating hormone receptor                                     | 91400993  | 91540509  | TC1200000943.mm.1     | 2.4    | 1.28E-05 |
| TC0100000256.mm.1 | NM_008858          | Prkd1       | protein kinase D1                                                        | 50341231  | 50649223  | TC1200001704.mm.1     | 0.8    | 1.33E-05 |
| TC0100000260.mm.1 | ENSMUST00000122341 | Gm12778     | predicted gene 12778                                                     | 34175712  | 34176044  | TC0700000630.mm.1     | -1.0   | 1.38E-05 |
| TC0100000280.mm.1 | NM_153507          | Cpne2       | copine II                                                                | 94532990  | 94570529  | TC0800001112.mm.1     | 0.8    | 1.43E-05 |
| TC0100000283.mm.1 | NM_020568          | Plin4       | perilipin 4                                                              | 56100591  | 56109802  | TC1700002313.mm.1     | 2.4    | 1.44E-05 |
| TC0100000284.mm.1 | NM_001276301       | Ampd3       | adenosine monophosphate deaminase 3                                      | 110768206 | 110812408 | TC0700001631.mm.1     | 0.6    | 1.48E-05 |
| TC0100000292.mm.1 | NM_009135          | Scn7a       | sodium channel, voltage-gated, type VII, alpha                           | 66673425  | 66784914  | TC0200003682.mm.1     | 2.2    | 1.50E-05 |
| TC0100000295.mm.1 | NM_008455          | Klkb1       | kallikrein B, plasma 1                                                   | 45269442  | 45333216  | TC0800002144.mm.1     | 0.4    | 1.55E-05 |
| TC0100000297.mm.1 | NM_009868          | Cdh5        | cadherin 5                                                               | 104101625 | 104144502 | TC0800001176.mm.1     | 2.1    | 1.56E-05 |
| TC0100000298.mm.1 | NM_011435          | Sod3        | superoxide dismutase 3, extracellular                                    | 52363804  | 52371405  | TC0500000527.mm.1     | 0.8    | 1.59E-05 |
| TC0100000302.mm.1 | NM_029796          | Lrg1        | leucine-rich alpha-2-glycoprotein 1                                      | 56119676  | 56121946  | TC1700002315.mm.1     | 1.5    | 1.68E-05 |
| TC0100000315.mm.1 | XM_283860          | Dcst2       | DC-STAMP domain containing 2                                             | 89365400  | 89373620  | TC0300000761.mm.1     | 0.3    | 1.73E-05 |
| TC0100000318.mm.1 | OTTMUST00000078288 | Ankrd5      | ---                                                                      | 136501910 | 136562098 | TC0200002075.mm.1     | 0.5    | 1.80E-05 |
| TC0100000321.mm.1 | NM_008871          | Serpine     | serine (or cysteine) peptidase inhibitor, clade                          | 137061504 | 137072272 | TC0500003431.mm.1     | 0.6    | 1.85E-05 |
| TC0100000330.mm.1 | NM_153781          | Pygb        | brain glycogen phosphorylase                                             | 150786735 | 150831758 | TC0200002228.mm.1     | 1.0    | 2.07E-05 |
| TC0100000331.mm.1 | NCBI_Gene:10004256 | Trav13n     | Trav13n-1 T cell receptor alpha variable 13N-1                           | 53162399  | 53162910  | TC1400000665.mm.1     | -0.7   | 2.15E-05 |
| TC0100000332.mm.1 | NM_026189          | Eepd1       | endonuclease/exonuclease/phosphatase family                              | 25481547  | 25604110  | TC0900000247.mm.1     | 1.0    | 2.25E-05 |
| TC0100000348.mm.1 | NM_001093764       | Myadm       | myeloid-associated differentiation marker                                | 3289038   | 3299349   | TC0700000005.mm.1     | 1.3    | 2.31E-05 |
| TC0100000352.mm.1 | ENSMUST00000120385 | Gm16200     | predicted gene 16200                                                     | 90221295  | 90221625  | TC0900002824.mm.1     | -1.0   | 2.33E-05 |
| TC0100000354.mm.1 | NM_010216          | Figf        | c-fos induced growth factor                                              | 164373378 | 164402650 | TC0X00001667.mm.1     | 1.1    | 2.45E-05 |
| TC0100000367.mm.1 | NM_009676          | Aox1        | aldehyde oxidase 1                                                       | 58029931  | 58106413  | TC0100000427.mm.1     | 1.0    | 2.52E-05 |
| TC0100000372.mm.1 | ENSMUST00000158307 | Gm25920     | predicted gene, 25920                                                    | 137912990 | 137913088 | TC03000003012.mm.1    | 0.4    | 2.55E-05 |
| TC0100000374.mm.1 | ENSMUST00000104944 | Gm2399      | predicted gene 2399                                                      | 12702362  | 12702589  | TC1300000076.mm.1     | 2.5    | 2.57E-05 |
| TC0100000375.mm.1 | NM_153068          | Ehd2        | EH-domain containing 2                                                   | 15946977  | 15967567  | TC0700002417.mm.1     | 2.6    | 2.58E-05 |
| TC0100000384.mm.1 | NM_153100          | Rtp3        | receptor transporter protein 3                                           | 110984935 | 110989713 | TC0900003122.mm.1     | 0.3    | 2.60E-05 |
| TC0100000399.mm.1 | NM_010332          | Ednra       | endothelin receptor type A                                               | 77663029  | 77724464  | TC0800002505.mm.1     | 0.8    | 2.66E-05 |
| TC0100000403.mm.1 | ENSMUST00000116189 | Gm12468     | predicted gene 12468                                                     | 53877925  | 53878328  | TC0400000591.mm.1     | -0.6   | 2.68E-05 |
| TC0100000404.mm.1 | NM_054071          | Fgfr1l      | fibroblast growth factor receptor-like 1                                 | 108694229 | 108706950 | TC0500001113.mm.1     | 0.8    | 2.68E-05 |
| TC0100000420.mm.1 | XM_977110          | Rps12-p     | ribosomal protein S12, pseudogene 12                                     | 124599329 | 124599833 | TC0X00002934.mm.1     | -0.8   | 2.76E-05 |
| TC0100000422.mm.1 | XM_978135          | Rps12-p     | ribosomal protein S12, pseudogene 14                                     | 125857648 | 125858152 | TC0X00002941.mm.1     | -0.8   | 2.76E-05 |
| TC0100000423.mm.1 | ENSMUST00000120378 | Rpl27-p     | ribosomal protein L27, pseudogene 2                                      | 101939501 | 101939899 | TC1100001673.mm.1     | -0.9   | 2.84E-05 |
| TC0100000427.mm.1 | ENSMUST00000080603 | Rpl35a-     | ribosomal protein L35A, pseudogene 7                                     | 47815300  | 47815632  | TC0600002213.mm.1     | -1.0   | 2.88E-05 |
| TC0100000436.mm.1 | NM_023168          | Grina       | glutamate receptor, ionotropic, N-methyl D-aspa                          | 76246798  | 76249912  | TC1500000580.mm.1     | 1.4    | 3.08E-05 |
| TC0100000437.mm.1 | NM_027878          | Dram1       | DNA-damage regulated autophagy modulator 1                               | 88322804  | 88379080  | TC1000002642.mm.1     | 1.1    | 3.10E-05 |
| TC0100000440.mm.1 | NM_080462          | Hnmt        | histamine N-methyltransferase                                            | 24002910  | 24049394  | TC0200003109.mm.1     | 1.0    | 3.16E-05 |
| TC0100000443.mm.1 | NM_013822          | Jag1        | jagged 1                                                                 | 137081451 | 137116644 | TC0200004713.mm.1     | 0.8    | 3.17E-05 |

|                   |                    |         |                                                 |           |           |                    |      |          |
|-------------------|--------------------|---------|-------------------------------------------------|-----------|-----------|--------------------|------|----------|
| TC0100000450.mm.1 | NM_008493          | Lep     | leptin                                          | 29060220  | 29073877  | TC0600000222.mm.1  | 2.6  | 3.29E-05 |
| TC0100000453.mm.1 | NM_009549          | Zfp185  | zinc finger protein 185                         | 72987339  | 73031543  | TC0X00000670.mm.1  | 0.6  | 3.29E-05 |
| TC0100000456.mm.1 | NM_019707          | Cdh13   | cadherin 13                                     | 118283733 | 119324921 | TC0800001414.mm.1  | 0.7  | 3.32E-05 |
| TC0100000457.mm.1 | ENSMUST00000184962 | RP24-68 | N/A                                             | 85599533  | 85599872  | TC1700001276.mm.1  | -0.4 | 3.38E-05 |
| TC0100000458.mm.1 | NM_008520          | Ltbp3   | latent transforming growth factor beta binding  | 5740904   | 5758532   | TC1900000082.mm.1  | 0.7  | 3.42E-05 |
| TC0100000459.mm.1 | ENSMUST00000180629 | Rpl31-p | ribosomal protein L31, pseudogene 7             | 47785996  | 47786374  | TC06000002210.mm.1 | -0.7 | 3.48E-05 |
| TC0100000460.mm.1 | NM_139236          | Nol6    | nucleolar protein family 6 (RNA-associated)     | 41114427  | 41124455  | TC0400002457.mm.1  | 0.6  | 3.53E-05 |
| TC0100000466.mm.1 | NM_0021890         | Fads3   | fatty acid desaturase 3                         | 10041548  | 10059671  | TC1900000186.mm.1  | 2.6  | 3.55E-05 |
| TC0100000469.mm.1 | XM_001477422       | Gm3470  | predicted gene 3470                             | 99021740  | 99022440  | TC0500002815.mm.1  | 1.1  | 3.75E-05 |
| TC0100000475.mm.1 | NM_030127          | Htra3   | HtrA serine peptidase 3                         | 35652026  | 35679782  | TC0500002252.mm.1  | 1.4  | 3.93E-05 |
| TC0100000482.mm.1 | NM_144862          | Lims2   | LIM and senescent cell antigen like domains 2   | 31931507  | 31958619  | TC1800000249.mm.1  | 1.5  | 3.97E-05 |
| TC0100000486.mm.1 | NM_010359          | Gstm3   | glutathione S-transferase, mu 3                 | 107963696 | 107969174 | TC0300003246.mm.1  | 0.7  | 4.04E-05 |
| TC0100000490.mm.1 | XM_001473434       | Gm14680 | predicted gene 14680                            | 62775128  | 62776742  | TC0X000002325.mm.1 | -0.6 | 4.36E-05 |
| TC0100000491.mm.1 | ENSMUST00000165914 | Gm9027  | predicted gene 9027                             | 61377256  | 61377916  | TC1600000781.mm.1  | -1.2 | 4.48E-05 |
| TC0100000495.mm.1 | ENSMUST00000119199 | Gm6630  | predicted pseudogene 6630                       | 23179556  | 23180011  | TC1600000333.mm.1  | -0.8 | 4.74E-05 |
| TC0100000508.mm.1 | NM_054098          | Steap4  | STEAP family member 4                           | 7960472   | 7982213   | TC0500000043.mm.1  | 2.3  | 4.90E-05 |
| TC0100000514.mm.1 | NM_0119946         | Mgst1   | microsomal glutathione S-transferase 1          | 138140316 | 138156755 | TC0600001639.mm.1  | 1.1  | 4.91E-05 |
| TC0100000520.mm.1 | NM_010917          | Nid1    | nidogen 1                                       | 13437602  | 13512275  | TC1300000087.mm.1  | 2.5  | 4.97E-05 |
| TC0100000521.mm.1 | ENSMUST00000166014 | Rpl35a- | ribosomal protein L35A, pseudogene 2            | 181241945 | 181242367 | TC0100003686.mm.1  | -0.7 | 5.10E-05 |
| TC0100000522.mm.1 | NM_011430          | Sncg    | synuclein, gamma                                | 34370274  | 34374789  | TC1400001725.mm.1  | 2.3  | 5.11E-05 |
| TC0100000532.mm.1 | XM_980899          | Gm7889  | predicted gene 7889                             | 93975852  | 93985819  | TC0100000950.mm.1  | 0.3  | 5.13E-05 |
| TC0100000533.mm.1 | NM_144512          | Slc6a13 | solute carrier family 6 (neurotransmitter trans | 121300227 | 121337733 | TC0600001370.mm.1  | 1.4  | 5.27E-05 |
| TC0100000535.mm.1 | NM_020581          | Angptl4 | angiopoietin-like 4                             | 33773750  | 33781575  | TC1700001877.mm.1  | 1.5  | 5.39E-05 |
| TC0100000548.mm.1 | NM_144942          | Csad    | cysteine sulfonic acid decarboxylase            | 102176998 | 102203163 | TC1500002285.mm.1  | 0.6  | 5.42E-05 |
| TC0100000554.mm.1 | NM_145394          | Slc44a3 | solute carrier family 44, member 3              | 121459528 | 121532344 | TC03000002840.mm.1 | 0.7  | 5.52E-05 |
| TC0100000557.mm.1 | ENSMUST00000119773 | Rps12-p | ribosomal protein S12, pseudogene 19            | 75070814  | 75071213  | TC1100003213.mm.1  | -1.2 | 5.52E-05 |
| TC0100000561.mm.1 | NM_008458          | Serpina | serine (or cysteine) peptidase inhibitor, clade | 104146382 | 104153872 | TC1900000289.mm.1  | 2.4  | 5.57E-05 |
| TC0100000570.mm.1 | NM_133186          | Steap3  | STEAP family member 3                           | 120190757 | 120272705 | TC0100002965.mm.1  | 0.4  | 5.71E-05 |
| TC0100000574.mm.1 | NM_011782          | Adamts5 | a disintegrin-like and metallopeptidase (reprol | 85858157  | 85901125  | TC1600001976.mm.1  | 2.3  | 5.75E-05 |
| TC0100000576.mm.1 | NM_172778          | Maob    | monoamine oxidase B                             | 16709281  | 16817366  | TC0X00001892.mm.1  | 1.0  | 5.79E-05 |
| TC0100000579.mm.1 | ENSMUST00000116696 | Gm24588 | predicted gene, 24588                           | 62779594  | 62779676  | TC1300000761.mm.1  | -1.1 | 5.98E-05 |
| TC0100000581.mm.1 | NM_011255          | Rbp4    | retinol binding protein 4, plasma               | 38116620  | 38125321  | TC1900001464.mm.1  | 1.9  | 6.03E-05 |
| TC0100000594.mm.1 | NM_175640          | Plin1   | perilipin 1                                     | 79721164  | 79732776  | TC0700003567.mm.1  | 2.1  | 6.05E-05 |
| TC0100000596.mm.1 | NM_010466          | Hoxc8   | homeobox C8                                     | 102990539 | 102994267 | TC1500001120.mm.1  | 1.6  | 6.07E-05 |
| TC0100000598.mm.1 | NM_010612          | Kdr     | kinase insert domain protein receptor           | 75932827  | 75978458  | TC0500002623.mm.1  | 1.4  | 6.33E-05 |
| TC0100000599.mm.1 | NM_001081039       | Dock9   | dedicator of cytokinesis 9                      | 121542039 | 121797734 | TC1400002740.mm.1  | 0.7  | 6.37E-05 |
| TC0100000600.mm.1 | NM_012056          | Fkbp9   | FK506 binding protein 9                         | 56832059  | 56879360  | TC0600000678.mm.1  | 1.1  | 6.51E-05 |
| TC0100000605.mm.1 | NM_177709          | Tusc5   | tumor suppressor candidate 5                    | 76679808  | 76698664  | TC1100001106.mm.1  | 2.2  | 6.66E-05 |
| TC0100000609.mm.1 | NM_001018063       | Cxx1b   | CAAX box 1B                                     | 53669177  | 53670408  | TC0X00002242.mm.1  | 0.9  | 6.75E-05 |
| TC0100000617.mm.1 | NM_013484          | C2      | complement component 2 (within H-2S)            | 34862602  | 34882100  | TC1700002817.mm.1  | 1.0  | 7.05E-05 |
| TC0100000619.mm.1 | ENSMUST00000121451 | Gm12005 | predicted gene 12005                            | 14162079  | 14162457  | TC100000143.mm.1   | -1.0 | 7.07E-05 |
| TC0100000622.mm.1 | ENSMUST00000097682 | Rpl27   | ribosomal protein L27                           | 6332590   | 6333064   | TC1800000044.mm.1  | -0.7 | 7.26E-05 |
| TC0100000623.mm.1 | NM_008695          | Nid2    | nidogen 2                                       | 19751257  | 19811787  | TC1400000158.mm.1  | 1.1  | 7.40E-05 |
| TC0100000633.mm.1 | NM_027875          | Syde1   | synapse defective 1, Rho GTPase, homolog 1 (C.  | 78584503  | 78591964  | TC1000002458.mm.1  | 0.5  | 7.65E-05 |
| TC0100000634.mm.1 | NM_001127330       | Pparg   | peroxisome proliferator activated receptor gami | 115361221 | 115490401 | TC0600001279.mm.1  | 1.5  | 7.82E-05 |
| TC0100000642.mm.1 | NM_054077          | Prelp   | proline arginine-rich end leucine-rich repeat   | 133910304 | 133921414 | TC0100003099.mm.1  | 2.6  | 7.82E-05 |
| TC0100000643.mm.1 | ENSMUST00000121251 | Rpl19-p | ribosomal protein L19, pseudogene 12            | 6071222   | 6071812   | TC0X00000045.mm.1  | -1.1 | 7.85E-05 |
| TC0100000652.mm.1 | XM_001002242       | Gm8430  | predicted pseudogene 8430                       | 122456872 | 122457421 | TC0600001383.mm.1  | -1.4 | 7.85E-05 |
| TC0100000660.mm.1 | NCBI_Gene:21637:pr | Tcrg-V3 | T cell receptor gamma, variable 3               | 19242845  | 19243301  | TC1300000142.mm.1  | -0.6 | 8.03E-05 |
| TC0100000662.mm.1 | NM_007568          | Btc     | betacellulin, epidermal growth factor family me | 91357261  | 91402994  | TC0500002738.mm.1  | 0.3  | 8.10E-05 |
| TC0100000668.mm.1 | ENSMUST00000120423 | Gm9083  | predicted gene 9083                             | 20239469  | 20240287  | TC0X00000202.mm.1  | -0.7 | 8.11E-05 |
| TC0100000682.mm.1 | NM_019444          | Ramp2   | receptor (calcitonin) activity modifying protei | 101246028 | 101248251 | TC1100004277.mm.1  | 0.3  | 8.14E-05 |
| TC0100000685.mm.1 | NM_001113379       | Lrrc32  | leucine rich repeat containing 32               | 98494222  | 98501831  | TC0700001368.mm.1  | 0.9  | 8.35E-05 |
| TC0100000691.mm.1 | NM_133764          | Atp6v0e | ATPase, H+ transporting, lysosomal V0 subunit E | 48537569  | 48541801  | TC0600000556.mm.1  | 0.8  | 8.46E-05 |
| TC0100000707.mm.1 | ENSMUST00000121333 | Gm2214  | predicted gene 2214                             | 144320926 | 144321255 | TC0X00003125.mm.1  | -0.8 | 8.50E-05 |
| TC0100000711.mm.1 | ENSMUST00000121742 | Gm11759 | predicted gene 11759                            | 145510194 | 145510657 | TC0200004769.mm.1  | -1.0 | 8.50E-05 |
| TC0100000721.mm.1 | ENSMUST00000088784 | Rpl27-p | ribosomal protein L27, pseudogene 1             | 171305084 | 171305494 | TC0100003539.mm.1  | -0.7 | 8.56E-05 |
| TC0100000722.mm.1 | NCBI_Gene:10012468 | Trbv23  | T cell receptor beta, variable V23              | 41216073  | 41216526  | TC0600000432.mm.1  | -0.4 | 8.74E-05 |
| TC0100000723.mm.1 | NM_145434          | Nr1d1   | nuclear receptor subfamily 1, group D, member   | 98767932  | 98775377  | TC1100003688.mm.1  | 1.4  | 8.92E-05 |
| TC0100000724.mm.1 | ENSMUST00000074353 | Rps10-p | ribosomal protein S10, pseudogene 1             | 95622278  | 95622775  | TC0300000907.mm.1  | -0.9 | 9.01E-05 |
| TC0100000726.mm.1 | ENSMUST00000121220 | Gm13862 | predicted gene 13862                            | 34810631  | 34810827  | TC0600002053.mm.1  | -0.8 | 9.03E-05 |
| TC0100000734.mm.1 | NM_001290278       | Rcor3   | REST corepressor 3 (Rcor3), transcript variant  | 0         | 0         | TSUnmapped0000001  | 0.4  | 9.17E-05 |
| TC0100000735.mm.1 | NM_133189          | Cacng7  | calcium channel, voltage-dependent, gamma sut   | 3332955   | 3368216   | TC0700000007.mm.1  | 0.4  | 9.22E-05 |
| TC0100000736.mm.1 | NM_172939          | Sowahc  | so sondowah ankyrin repeat domain family mem    | 59221922  | 59226434  | TC1000000529.mm.1  | 0.9  | 9.26E-05 |
| TC0100000757.mm.1 | ENSMUST00000054104 | Gm9294  | predicted pseudogene 9294                       | 42953597  | 42954388  | TC0700002939.mm.1  | -0.9 | 9.31E-05 |
| TC0100000768.mm.1 | ENSMUST00000121779 | Rpl35a- | ribosomal protein 35A, pseudogene 4             | 108874926 | 108875258 | TC0200004296.mm.1  | -1.1 | 9.35E-05 |
| TC0100000774.mm.1 | ENSMUST00000148282 | Rpl35a- | ribosomal protein L35A, pseudogene 6            | 123255481 | 123255813 | TC0500003229.mm.1  | -1.1 | 9.35E-05 |
| TC0100000778.mm.1 | ENSMUST00000147311 | Rpl35a- | ribosomal protein L35A, pseudogene 3            | 29136972  | 29137304  | TC1700001779.mm.1  | -1.1 | 9.35E-05 |
| TC0100000780.mm.1 | NM_001012765       | Adcy5   | adenylate cyclase 5                             | 35154877  | 35305737  | TC1600000491.mm.1  | 0.7  | 9.88E-05 |
| TC0100000785.mm.1 | NM_008115          | Gfra2   | glial cell line derived neurotrophic factor fam | 70890130  | 70979838  | TC1400001012.mm.1  | 0.4  | 0.000101 |
| TC0100000790.mm.1 | ENSMUST00000181363 | Gm8652  | predicted gene 8652                             | 6351304   | 6352267   | TC0600001819.mm.1  | -0.9 | 0.000101 |
| TC0100000811.mm.1 | ENSMUST00000122161 | Gm16210 | predicted gene 16210                            | 39752259  | 39752868  | TC1000002028.mm.1  | -1.1 | 0.000101 |
| TC0100000812.mm.1 | NM_001013367       | Prkaa1  | protein kinase, AMP-activated, alpha 1 catalyti | 5143861   | 5181899   | TC1500000021.mm.1  | 0.5  | 0.000102 |
| TC0100000818.mm.1 | NM_010698          | Ldb2    | LIM domain binding 2                            | 4472133   | 44799746  | TC0500002328.mm.1  | 0.5  | 0.000103 |
| TC0100000827.mm.1 | NM_001271421       | Ephx2   | epoxide hydrolase 2, cytoplasmic                | 66084372  | 66124522  | TC1400002266.mm.1  | 1.5  | 0.000109 |
| TC0100000829.mm.1 | ENSMUST00000179134 | Gm10243 | predicted gene 10243                            | 48523456  | 48523885  | TC0600000555.mm.1  | -0.6 | 0.000111 |
| TC0100000833.mm.1 | NM_009236          | Sox18   | SRY-box containing gene 18                      | 181669836 | 181671640 | TC02000005453.mm.1 | 0.5  | 0.000114 |
| TC0100000834.mm.1 | ENSMUST00000168993 | Gm7289  | predicted gene 7289                             | 84658932  | 84659844  | TC1800001711.mm.1  | -1.1 | 0.000114 |

|                   |                    |         |                                                 |           |           |                    |      |          |
|-------------------|--------------------|---------|-------------------------------------------------|-----------|-----------|--------------------|------|----------|
| TC0100000835.mm.1 | NM_008483          | Lamb2   | laminin, beta 2                                 | 108479862 | 108490530 | TC0900001408.mm.1  | 0.8  | 0.000118 |
| TC0100000836.mm.1 | NM_013467          | Aldh1a1 | aldehyde dehydrogenase family 1, subfamily A1   | 20601961  | 20643462  | TC1900000335.mm.1  | 1.9  | 0.000119 |
| TC0100000843.mm.1 | ENSMUST00000116081 | NM14853 | predicted gene 14853                            | 105844465 | 105845013 | TC0X00002821.mm.1  | -1.1 | 0.000119 |
| TC0100000844.mm.1 | NM_001081147       | Oxtr    | oxytocin receptor                               | 112473684 | 112489808 | TC0600002901.mm.1  | 1.8  | 0.000119 |
| TC0100000847.mm.1 | NM_031180          | Klb     | klotho beta                                     | 65348322  | 65384003  | TC0500000609.mm.1  | 1.1  | 0.000122 |
| TC0100000862.mm.1 | ENSMUST00000119807 | Gm15745 | predicted gene 15745                            | 87067477  | 87067591  | TC1200000868.mm.1  | -0.4 | 0.000123 |
| TC0100000870.mm.1 | NM_007446          | Amy1    | amylase 1, salivary                             | 113555710 | 113577830 | TC0300003247.mm.1  | 1.2  | 0.000125 |
| TC0100000878.mm.1 | NM_013902          | Fkbp3   | FK506 binding protein 3                         | 65062432  | 65073944  | TC1200001832.mm.1  | -0.7 | 0.000125 |
| TC0100000883.mm.1 | ENSMUST00000139165 | Rps12-p | ribosomal protein S12, pseudogene 9             | 123206623 | 123207021 | TC0800001512.mm.1  | -1.0 | 0.000127 |
| TC0100000884.mm.1 | NM_001040684       | Hsd3b7  | hydroxy-delta-5-steroid dehydrogenase, 3 beta-  | 127800604 | 127803802 | TC0700004630.mm.1  | 0.4  | 0.000128 |
| TC0100000890.mm.1 | NM_008630          | Mt2     | metallothionein 2                               | 94172618  | 94173567  | TC0800001094.mm.1  | 1.1  | 0.000128 |
| TC0100000891.mm.1 | NM_013623          | Orm3    | orosomucoid 3                                   | 63356162  | 63359511  | TC0400000720.mm.1  | 0.5  | 0.000129 |
| TC0100000897.mm.1 | ENSMUST00000180440 | Rpl31-p | ribosomal protein L31, pseudogene 23            | 35132995  | 35133532  | TC0800002043.mm.1  | -0.8 | 0.000129 |
| TC0100000916.mm.1 | NM_133237          | Apcdd1  | adenomatosis polyposis coli down-regulated 1    | 62922327  | 62953655  | TC1800000646.mm.1  | 1.0  | 0.000137 |
| TC0100000917.mm.1 | XM_484529          | Gm5481  | predicted gene 5481                             | 16275603  | 16275950  | TC1600000195.mm.1  | -0.7 | 0.000143 |
| TC0100000919.mm.1 | ENSMUST00000161787 | Rps19-p | ribosomal protein S19, pseudogene 9             | 87948464  | 87948877  | TC0600002670.mm.1  | -0.6 | 0.000145 |
| TC0100000929.mm.1 | NCBI_Gene:107575:p | Tcrg-C3 | T cell receptor gamma, constant 3               | 19263884  | 19263397  | TC1300000144.mm.1  | -2.0 | 0.000146 |
| TC0100000932.mm.1 | NM_172721          | Fbxw8   | F-box and WD-40 domain protein 8                | 118064981 | 118155458 | TC04000003136.mm.1 | 0.7  | 0.000148 |
| TC0100000934.mm.1 | NM_021318          | Fhl5    | four and a half LIM domains 5                   | 25199908  | 25242876  | TC0400002315.mm.1  | 0.9  | 0.000148 |
| TC0100000936.mm.1 | NM_028030          | Rbpms2  | RNA binding protein with multiple splicing 2    | 65629648  | 65660528  | TC0900000848.mm.1  | 0.9  | 0.00015  |
| TC0100000937.mm.1 | NM_033569          | Cnmn2   | cyclin M2                                       | 46761596  | 46878795  | TC1900000711.mm.1  | 1.0  | 0.000152 |
| TC0100000942.mm.1 | NM_016723          | Uchl3   | ubiquitin carboxyl-terminal esterase L3 (ubiqui | 101653967 | 101696125 | TC1400001174.mm.1  | -0.6 | 0.000153 |
| TC0100000944.mm.1 | NM_001163476       | Gins1   | GIN5 complex subunit 1 (Psf1 homolog)           | 150905400 | 150931280 | TC0200002232.mm.1  | -0.6 | 0.000153 |
| TC0100000946.mm.1 | ENSMUST00000097103 | Gm8420  | predicted gene 8420                             | 51940650  | 51941261  | TC0100002312.mm.1  | -1.3 | 0.000162 |
| TC0100000950.mm.1 | NM_033584          | Pcdhga1 | protocadherin gamma subfamily A, 1              | 37661945  | 37841962  | TC1800001741.mm.1  | 0.3  | 0.000163 |
| TC0100000957.mm.1 | NM_011921          | Aldh1a7 | aldehyde dehydrogenase family 1, subfamily A7   | 20692953  | 20727562  | TC1900001246.mm.1  | 1.8  | 0.000164 |
| TC0100000959.mm.1 | ENSMUST00000120718 | Akt2-ps | thymoma viral proto-oncogene 2, pseudogene      | 16514533  | 16515981  | TC1100000158.mm.1  | 1.0  | 0.000166 |
| TC0100000964.mm.1 | ENSMUST00000117955 | Gm14263 | predicted gene 14263                            | 170954079 | 170954824 | TC0200005260.mm.1  | -0.7 | 0.000167 |
| TC0100000965.mm.1 | NM_001277328       | Sox6    | SRY-box containing gene 6                       | 115470872 | 116038744 | TC0700004148.mm.1  | 0.3  | 0.000169 |
| TC0100000967.mm.1 | NM_007874          | Reep5   | receptor accessory protein 5                    | 34344885  | 34373415  | TC1800001147.mm.1  | 1.1  | 0.00017  |
| TC0100000973.mm.1 | ENSMUST00000119546 | H3f3a-p | H3 histone, family 3A, pseudogene 1             | 101824515 | 101824924 | TC0X00000987.mm.1  | -0.9 | 0.000171 |
| TC0100000978.mm.1 | NM_001111049       | Cd151   | CD151 antigen                                   | 141467362 | 141471481 | TC0700002055.mm.1  | 1.5  | 0.000173 |
| TC0100000981.mm.1 | NM_016972          | Slc7a8  | solute carrier family 7 (cationic amino acid tr | 54722215  | 54781886  | TC1400002067.mm.1  | 1.3  | 0.000177 |
| TC0100000984.mm.1 | NM_013602          | Mt1     | metallothionein 1                               | 94179089  | 94180327  | TC0800001095.mm.1  | 1.3  | 0.000177 |
| TC0100000988.mm.1 | NM_001171007       | Nod1    | nucleotide-binding oligomerization domain cont  | 54923942  | 54972612  | TC0600002323.mm.1  | 0.3  | 0.000178 |
| TC0100000998.mm.1 | NM_001033156       | Fbxo33  | F-box protein 33                                | 59200655  | 59219725  | TC1200001816.mm.1  | -0.4 | 0.000178 |
| TC0100001005.mm.1 | ENSMUST00000118297 | Gm13196 | predicted gene 13196                            | 4700238   | 4700639   | TC0200000032.mm.1  | -0.9 | 0.00018  |
| TC0100001006.mm.1 | NM_022032          | Perp    | PERP, TP53 apoptosis effector                   | 18845071  | 18857078  | TC1000000133.mm.1  | -0.7 | 0.000181 |
| TC0100001010.mm.1 | NM_026700          | Dopey2  | dopey family member 2                           | 93711907  | 93810588  | TC1600001047.mm.1  | 0.5  | 0.000185 |
| TC0100001016.mm.1 | NM_153533          | Tenc1   | tensin like C1 domain-containing phosphatase    | 102100413 | 102116401 | TC1500001088.mm.1  | 1.1  | 0.000186 |
| TC0100001024.mm.1 | ENSMUST00000171003 | Gm5778  | predicted gene 5778                             | 73201695  | 73202766  | TC1000000697.mm.1  | -0.9 | 0.000192 |
| TC0100001040.mm.1 | NCBI_Gene:10012643 | Trgj1   | T cell receptor gamma joining 1                 | 19210341  | 19217024  | TC1300002762.mm.1  | -1.9 | 0.000194 |
| TC0100001056.mm.1 | NM_026163          | Pkp2    | plakophilin 2                                   | 16213318  | 16272712  | TC1600000193.mm.1  | 1.1  | 0.000196 |
| TC0100001058.mm.1 | NM_013759          | Msrb1   | methionine sulfoxide reductase B1               | 24736642  | 24742778  | TC1700000351.mm.1  | 0.6  | 0.000197 |
| TC0100001076.mm.1 | NM_198105          | Fam120c | family with sequence similarity 120, member C   | 151344175 | 151474136 | TC0X00001515.mm.1  | 0.3  | 0.000205 |
| TC0100001077.mm.1 | ENSMUST00000122378 | Gm14730 | predicted gene 14730                            | 71197127  | 71198171  | TC0X00000648.mm.1  | -0.8 | 0.00021  |
| TC0100001101.mm.1 | NM_028804          | Ccdc3   | coiled-coil domain containing 3                 | 5137776   | 5230878   | TC0200000048.mm.1  | 1.6  | 0.000211 |
| TC0100001103.mm.1 | NM_001037726       | Creb1   | cAMP responsive element binding protein 1       | 64532804  | 64604548  | TC0100000535.mm.1  | -0.8 | 0.000214 |
| TC0100001105.mm.1 | NM_018868          | Nop58   | NOP58 ribonucleoprotein                         | 59685005  | 59711510  | TC0100000456.mm.1  | -1.1 | 0.000214 |
| TC0100001107.mm.1 | NM_011692          | Vbp1    | von Hippel-Lindau binding protein 1             | 75514297  | 75534946  | TC0X00000745.mm.1  | -0.5 | 0.000215 |
| TC0100001111.mm.1 | NM_015734          | Cla5a1  | collagen, type V, alpha 1                       | 27886425  | 28039514  | TC0200000478.mm.1  | 0.2  | 0.000216 |
| TC0100001114.mm.1 | ENSMUST00000177870 | Gm6625  | predicted gene 6625                             | 89146747  | 89147247  | TC0800002669.mm.1  | -0.7 | 0.000216 |
| TC0100001117.mm.1 | NM_134042          | Aldh6a1 | aldehyde dehydrogenase family 6, subfamily A1   | 84430717  | 84450950  | TC1200002078.mm.1  | 2.1  | 0.000217 |
| TC0100001119.mm.1 | ENSMUST00000119927 | Gm12331 | predicted gene 12331                            | 74077519  | 74078140  | TC1100003186.mm.1  | -1.2 | 0.000217 |
| TC0100001123.mm.1 | NM_174848          | Crybg3  | beta-gamma crystallin domain containing 3       | 59490775  | 59555752  | TC1600001805.mm.1  | 0.6  | 0.000222 |
| TC0100001124.mm.1 | NM_145930          | AW54987 | expressed sequence AW549877                     | 3982035   | 3995752   | TC1500001145.mm.1  | 0.7  | 0.000223 |
| TC0100001128.mm.1 | NM_010255          | Gamt    | guanidinoacetate methyltransferase              | 80258151  | 80261012  | TC1000002493.mm.1  | 0.3  | 0.000224 |
| TC0100001138.mm.1 | ENSMUST00000119731 | Gm4986  | predicted pseudogene 4986                       | 40137008  | 40137556  | TC0X00002103.mm.1  | -0.7 | 0.000228 |
| TC0100001158.mm.1 | ENSMUST00000121609 | Gm12267 | predicted gene 12267                            | 60449210  | 60449970  | TC1100002875.mm.1  | -0.4 | 0.000234 |
| TC0100001168.mm.1 | NM_053173          | Kifc5b  | kinesin family member C5B                       | 26917091  | 26932579  | TC1700000424.mm.1  | -0.2 | 0.00024  |
| TC0100001170.mm.1 | NM_007715          | Clock   | circadian locomotor output cycles kaput         | 76209868  | 76304792  | TC0500002628.mm.1  | 0.9  | 0.000241 |
| TC0100001173.mm.1 | NM_011723          | Xdh     | xanthine dehydrogenase                          | 73883895  | 73950196  | TC1700002526.mm.1  | 1.0  | 0.000244 |
| TC0100001177.mm.1 | NM_018733          | Scn1a   | sodium channel, voltage-gated, type I, alpha    | 66270781  | 66440840  | TC0200003674.mm.1  | -0.3 | 0.000245 |
| TC0100001188.mm.1 | NM_207237          | Man1c1  | mannosidase, alpha, class 1C, member 1          | 134561690 | 134704290 | TC0400003742.mm.1  | 0.7  | 0.000246 |
| TC0100001195.mm.1 | ENSMUST00000094754 | Rpl7a-p | ribosomal protein L7A, pseudogene 8             | 19953783  | 19954583  | TC0700000314.mm.1  | -0.7 | 0.000249 |
| TC0100001196.mm.1 | NM_009906          | Tpp1    | tripeptidyl peptidase I                         | 105744847 | 105752207 | TC0700003990.mm.1  | 1.2  | 0.000249 |
| TC0100001201.mm.1 | ENSMUST00000122265 | Rpl30-p | ribosomal protein L30, pseudogene 9             | 105278637 | 105278984 | TC0X00002813.mm.1  | -0.7 | 0.00025  |
| TC0100001206.mm.1 | NM_029094          | Pik3cb  | phosphatidylinositol 3-kinase, catalytic, beta  | 99038402  | 99140621  | TC0900002915.mm.1  | 0.5  | 0.00025  |
| TC0100001208.mm.1 | NM_001163574       | Tjp1    | tight junction protein 1                        | 65296165  | 65371244  | TC0700003420.mm.1  | 1.0  | 0.000251 |
| TC0100001218.mm.1 | ENSMUST00000086764 | Gm21571 | predicted gene, 21571 // ribosomal protein S12  | 59322290  | 59322783  | TC1900000851.mm.1  | -0.9 | 0.000253 |
| TC0100001219.mm.1 | ENSMUST00000174736 | Gm8741  | predicted gene 8741                             | 35335909  | 35336292  | TC1700000681.mm.1  | -0.8 | 0.000255 |
| TC0100001231.mm.1 | NM_013648          | Rtn2    | reticulin 2 (Z-band associated protein)         | 19282624  | 19296164  | TC0700000296.mm.1  | 0.3  | 0.000258 |
| TC0100001238.mm.1 | ENSMUST00000080355 | Gm21571 | predicted gene, 21571 // ribosomal protein S12  | 56013933  | 56014428  | TC0700000935.mm.1  | -0.7 | 0.00026  |
| TC0100001244.mm.1 | ENSMUST00000184038 | Gm5269  | predicted gene 5269                             | 45889525  | 45890273  | TC0100002284.mm.1  | -0.5 | 0.000261 |
| TC0100001247.mm.1 | ENSMUST00000184830 | RP23-47 | N/A                                             | 64839100  | 64839418  | TC1400000929.mm.1  | -0.4 | 0.000264 |
| TC0100001249.mm.1 | ENSMUST00000071565 | Gm4978  | predicted gene 4978                             | 69450232  | 69451035  | TC0900002580.mm.1  | -0.5 | 0.000264 |
| TC0100001252.mm.1 | ENSMUST00000121557 | Gm13688 | predicted gene 13688                            | 80602733  | 80603340  | TC0200001175.mm.1  | -0.9 | 0.000265 |
| TC0100001256.mm.1 | NM_001135172       | C1qtnf7 | C1q and tumor necrosis factor related protein 7 | 43515569  | 43618817  | TC0500000462.mm.1  | 0.3  | 0.000272 |

|                   |                    |          |                                                 |           |           |                   |      |          |
|-------------------|--------------------|----------|-------------------------------------------------|-----------|-----------|-------------------|------|----------|
| TC0100001271.mm.1 | ENSMUST00000181233 | Rps19-p  | ribosomal protein S19, pseudogene 6             | 110898114 | 110898551 | TC1200001221.mm.1 | -1.2 | 0.000272 |
| TC0100001274.mm.1 | NM_008972          | Ptma     | prothymosin alpha                               | 86526736  | 86530700  | TC0100000790.mm.1 | -1.2 | 0.000272 |
| TC0100001277.mm.1 | NM_146241          | TRhe     | TRH-degrading enzyme                            | 114398821 | 114802307 | TC1000002886.mm.1 | 0.6  | 0.000273 |
| TC0100001279.mm.1 | NM_007483          | Rhob     | ras homolog gene family, member B               | 8497758   | 8499996   | TC1200001397.mm.1 | 0.8  | 0.000274 |
| TC0100001292.mm.1 | NM_008489          | Lbp      | lipopolysaccharide binding protein              | 158306493 | 158332852 | TC0200002426.mm.1 | 1.9  | 0.000274 |
| TC0100001307.mm.1 | ENSMUST00000177641 | Gm8260   | predicted gene 8260                             | 64047554  | 64047906  | TC0X00002330.mm.1 | -0.7 | 0.000279 |
| TC0100001311.mm.1 | NM_009825          | Serpinh  | serine (or cysteine) peptidase inhibitor, clade | 99345375  | 99353239  | TC0700003797.mm.1 | 0.6  | 0.000282 |
| TC0100001312.mm.1 | NM_177648          | Dolk     | dolichol kinase                                 | 30284229  | 30286354  | TC0200003267.mm.1 | 0.6  | 0.000283 |
| TC0100001315.mm.1 | OTTMUST00000010011 | RP23-38  | ---                                             | 8456166   | 8456504   | TC0400002176.mm.1 | -0.5 | 0.000284 |
| TC0100001317.mm.1 | NM_007409          | Adh1     | alcohol dehydrogenase 1 (class I)               | 138260991 | 138290698 | TC0300001409.mm.1 | 1.4  | 0.000285 |
| TC0100001324.mm.1 | NM_011158          | Prkar2b  | protein kinase, cAMP dependent regulatory, typ  | 31958476  | 32061296  | TC1200001602.mm.1 | 1.9  | 0.000286 |
| TC0100001329.mm.1 | NM_146094          | Fads1    | fatty acid desaturase 1                         | 10182888  | 10196874  | TC1900000188.mm.1 | 0.7  | 0.000287 |
| TC0100001332.mm.1 | XM_003084942       | Gm10257  | predicted gene 10257                            | 100946405 | 100946815 | TC1300002545.mm.1 | -0.8 | 0.00029  |
| TC0100001338.mm.1 | NR_033639          | Rps19-p  | ribosomal protein S19, pseudogene 3             | 147821777 | 147822202 | TC0400003999.mm.1 | -0.5 | 0.000295 |
| TC0100001347.mm.1 | NR_033402          | Tyms     | thymidylate synthase                            | 30058200  | 30073625  | TC0500002152.mm.1 | -0.5 | 0.000296 |
| TC0100001351.mm.1 | XM_892026          | Gm6749   | predicted pseudogene 6749                       | 108880794 | 108882411 | TC0600001209.mm.1 | -0.8 | 0.000298 |
| TC0100001353.mm.1 | ENSMUST00000116438 | Gm7091   | predicted gene 7091                             | 140821938 | 140822523 | TC0X00003080.mm.1 | -0.8 | 0.000298 |
| TC0100001369.mm.1 | NM_009026          | Rasd1    | RAS, dexamethasone-induced 1                    | 59963181  | 59964944  | TC1100002865.mm.1 | 1.1  | 0.000304 |
| TC0100001375.mm.1 | OTTMUST00000044756 | RP23-38  | ---                                             | 124469959 | 124470357 | TC0X00002933.mm.1 | -1.1 | 0.000307 |
| TC0100001378.mm.1 | OTTMUST00000044766 | RP23-32  | ---                                             | 124973550 | 124973948 | TC0X00002937.mm.1 | -1.1 | 0.000307 |
| TC0100001381.mm.1 | XM_003688976       | Gm21571  | predicted gene, 21571                           | 125404959 | 125405357 | TC0X00002938.mm.1 | -1.1 | 0.000307 |
| TC0100001382.mm.1 | OTTMUST00000044767 | RP23-30  | ---                                             | 125674833 | 125675231 | TC0X00002940.mm.1 | -1.1 | 0.000307 |
| TC0100001388.mm.1 | ENSMUST00000100614 | Rps19-p  | ribosomal protein S19, pseudogene 2             | 52902793  | 52903230  | TC1400000642.mm.1 | -0.9 | 0.000307 |
| TC0100001392.mm.1 | ENSMUST00000168472 | Rps19-p  | ribosomal protein S19, pseudogene 1             | 53213730  | 53214167  | TC1400000672.mm.1 | -0.9 | 0.000307 |
| TC0100001397.mm.1 | ENSMUST00000052888 | Gm10254  | predicted gene 10254                            | 54810564  | 54811250  | TC0300001990.mm.1 | -0.9 | 0.000311 |
| TC0100001400.mm.1 | NCBI_Gene:21632:pr | Gm16602  | T cell receptor gamma, variable 1               | 19339934  | 19352763  | TC1300000145.mm.1 | -0.7 | 0.000312 |
| TC0100001405.mm.1 | ENSMUST00000096279 | Gm10343  | predicted gene 10343                            | 10801369  | 10801716  | TC1600000120.mm.1 | -0.7 | 0.000315 |
| TC0100001412.mm.1 | NM_178901          | Al46760  | expressed sequence Al467606                     | 127091436 | 127094049 | TC0700001833.mm.1 | -0.9 | 0.000315 |
| TC0100001414.mm.1 | ENSMUST00000117876 | Gm13886  | predicted gene 13886                            | 104820179 | 104821361 | TC0200001571.mm.1 | -0.5 | 0.000317 |
| TC0100001425.mm.1 | NM_001145959       | Ndrg2    | N-myc downstream regulated gene 2               | 51905271  | 51913488  | TC1400002017.mm.1 | 1.4  | 0.000326 |
| TC0100001431.mm.1 | NM_144953          | 1700019  | RIKEN cDNA 1700019D03 gene                      | 52922324  | 52963260  | TC0100002330.mm.1 | -0.4 | 0.000326 |
| TC0100001433.mm.1 | ENSMUST00000120970 | Gm15750  | predicted gene 15750                            | 4764834   | 4765647   | TC0500000027.mm.1 | -0.7 | 0.000327 |
| TC0100001446.mm.1 | NM_026212          | Agpat2   | 1-acylglycerol-3-phosphate O-acyltransferase 2  | 26593057  | 26604417  | TC0200003195.mm.1 | 1.0  | 0.00033  |
| TC0100001449.mm.1 | ENSMUST00000117875 | Gm13607  | predicted gene 13607                            | 68081791  | 68082329  | TC0200000984.mm.1 | -0.4 | 0.000333 |
| TC0100001452.mm.1 | NR_028142          | Pnpla2   | patatin-like phospholipase domain containing 2  | 141455188 | 141460743 | TC0700002053.mm.1 | 2.2  | 0.000333 |
| TC0100001455.mm.1 | NM_009621          | Adams1   | a disintegrin-like and metallopeptidase (reprol | 85793827  | 85803115  | TC1600001974.mm.1 | 0.6  | 0.000334 |
| TC0100001458.mm.1 | ENSMUST00000083277 | Gm26265  | predicted gene, 26265                           | 95756950  | 95757084  | TC0800002753.mm.1 | -0.5 | 0.000334 |
| TC0100001487.mm.1 | NM_026159          | Retsat   | retinol saturase (all trans retinol 13,14 reduc | 72598475  | 72608425  | TC0600000854.mm.1 | 0.9  | 0.000334 |
| TC0100001489.mm.1 | XM_893413          | Gm6901   | predicted gene 6901                             | 65559166  | 65559714  | TC1300000796.mm.1 | -0.8 | 0.000335 |
| TC0100001491.mm.1 | NM_007722          | Cxcr7    | chemokine (C-X-C motif) receptor 7              | 90203980  | 90216751  | TC0100000870.mm.1 | 0.3  | 0.000343 |
| TC0100001494.mm.1 | NR_036615          | Srsf7    | serine/arginine-rich splicing factor 7          | 80200080  | 80207305  | TC0100002583.mm.1 | -0.7 | 0.000351 |
| TC0100001496.mm.1 | ENSMUST00000118307 | Gm12191  | predicted gene 12191                            | 49678710  | 49679057  | TC1100002660.mm.1 | -0.7 | 0.000351 |
| TC0100001498.mm.1 | NM_007951          | Erh      | enhancer of rudimentary homolog (Drosophila)    | 80634022  | 80644341  | TC1200002002.mm.1 | -0.4 | 0.000356 |
| TC0100001501.mm.1 | NM_010447          | Hnrrnpa1 | heterogeneous nuclear ribonucleoprotein A1      | 103240397 | 103246698 | TC1500001127.mm.1 | -0.8 | 0.000365 |
| TC0100001502.mm.1 | BC103795           | Eif3m    | eukaryotic translation initiation factor 3, sub | 104999656 | 105017080 | TC0200004253.mm.1 | -0.6 | 0.000367 |
| TC0100001510.mm.1 | ENSMUST00000080443 | Gm10260  | predicted gene 10260                            | 107262817 | 107263248 | TC0800002875.mm.1 | -0.8 | 0.000368 |
| TC0100001513.mm.1 | NM_019562          | Uchl5    | ubiquitin carboxyl-terminal esterase L5         | 143777278 | 143807466 | TC0100001317.mm.1 | -0.8 | 0.00037  |
| TC0100001526.mm.1 | NM_008891          | Pnn      | pinin                                           | 59066919  | 59074017  | TC1200000500.mm.1 | -0.5 | 0.000372 |
| TC0100001532.mm.1 | NM_001206368       | Gsn      | gelsolin                                        | 35256359  | 35307902  | TC0200000636.mm.1 | 1.5  | 0.000374 |
| TC0100001538.mm.1 | NM_001033324       | Zbtb16   | zinc finger and BTB domain containing 16        | 48654297  | 48836222  | TC0900002241.mm.1 | 1.0  | 0.000377 |
| TC0100001548.mm.1 | ENSMUST00000178086 | Gm4761   | predicted gene 4761                             | 67414431  | 67415012  | TC0600002424.mm.1 | -0.6 | 0.000378 |
| TC0100001549.mm.1 | ENSMUST00000121828 | Gm15730  | predicted gene 15730                            | 8055139   | 8055553   | TC0500000045.mm.1 | -0.5 | 0.000379 |
| TC0100001550.mm.1 | NM_144816          | Rhbd11   | rhomboid, veinlet-like 1 (Drosophila)           | 25834465  | 25837295  | TC1700002801.mm.1 | 0.3  | 0.000379 |
| TC0100001566.mm.1 | NM_029556          | Clybl    | citrate lyase beta like                         | 122181694 | 122402234 | TC1400001331.mm.1 | 1.2  | 0.000381 |
| TC0100001567.mm.1 | ENSMUST00000121688 | Gm12732  | predicted gene 12732                            | 77639854  | 77640033  | TC1100001130.mm.1 | -0.4 | 0.000384 |
| TC0100001568.mm.1 | ENSMUST00000178210 | Rpl35a-  | ribosomal protein L35A, pseudogene 5            | 33075995  | 330776411 | TC0500000352.mm.1 | -0.8 | 0.000385 |
| TC0100001569.mm.1 | NM_001276296       | Ednrb    | endothelin receptor type B                      | 103814615 | 103844476 | TC1400002641.mm.1 | 1.1  | 0.000388 |
| TC0100001575.mm.1 | NM_001085515       | Al46413  | expressed sequence Al464131                     | 41495601  | 41503076  | TC0400002469.mm.1 | 0.6  | 0.000393 |
| TC0100001580.mm.1 | NM_001195681       | Gm684    | predicted gene 684                              | 51270258  | 51278554  | TC0900002287.mm.1 | 0.6  | 0.000395 |
| TC0100001585.mm.1 | ENSMUST00000118644 | Gm8662   | predicted gene 8662                             | 158248797 | 158249370 | TC0X00001605.mm.1 | -1.0 | 0.000397 |
| TC0100001586.mm.1 | ENSMUST00000119630 | Rpl30-p  | ribosomal protein L30, pseudogene 11            | 12456886  | 12457230  | TC0X00001855.mm.1 | -0.7 | 0.000398 |
| TC0100001593.mm.1 | XM_983917          | Gm8112   | predicted gene 8112                             | 81693718  | 81694185  | TC1000002552.mm.1 | -0.9 | 0.000403 |
| TC0100001597.mm.1 | XM_984537          | Gm8158   | predicted gene 8158                             | 81985935  | 81986402  | TC1000002557.mm.1 | -0.9 | 0.000403 |
| TC0100001600.mm.1 | ENSMUST00000118088 | Gm8731   | predicted gene 8731                             | 60778983  | 60779394  | TC1800001407.mm.1 | -0.6 | 0.000403 |
| TC0100001603.mm.1 | ENSMUST00000120842 | Gm8152   | predicted gene 8152                             | 107381381 | 107382017 | TC0500002923.mm.1 | -0.9 | 0.000405 |
| TC0100001604.mm.1 | ENSMUST00000087025 | Rpl7a-p  | ribosomal protein L7A, pseudogene 11            | 166854190 | 166855053 | TC0X00001688.mm.1 | -0.7 | 0.000406 |
| TC0100001605.mm.1 | ENSMUST00000091925 | Rps19-p  | ribosomal protein S19, pseudogene 4             | 42252398  | 42252835  | TC1800000433.mm.1 | -1.1 | 0.000409 |
| TC0100001615.mm.1 | ENSMUST00000120025 | Gm9183   | predicted gene 9183                             | 47620771  | 47622339  | TC1700002209.mm.1 | -0.5 | 0.000411 |
| TC0100001621.mm.1 | ENSMUST00000072391 | Hist1h2  | histone cluster 1, H2aa                         | 23934462  | 23934851  | TC1300000268.mm.1 | -1.1 | 0.000413 |
| TC0100001632.mm.1 | NM_001163170       | Lix1l    | Lix1-like                                       | 96601133  | 96625352  | TC0300000952.mm.1 | 0.5  | 0.000416 |
| TC0100001634.mm.1 | ENSMUST00000118980 | Gm11473  | predicted gene 11473                            | 167281419 | 167281777 | TC0200005185.mm.1 | -0.4 | 0.000418 |
| TC0100001657.mm.1 | NM_008150          | Gpc4     | glypican 4                                      | 52053018  | 52165252  | TC0X00002207.mm.1 | 1.2  | 0.000418 |
| TC0100001661.mm.1 | NM_011843          | Esy1t    | extended synaptotagmin-like protein 1           | 128510248 | 128525859 | TC1000003148.mm.1 | 0.9  | 0.00042  |
| TC0100001664.mm.1 | NM_001143848       | Pde2a    | phosphodiesterase 2A, cGMP-stimulated           | 101421691 | 101512829 | TC0700001432.mm.1 | 1.2  | 0.00042  |
| TC0100001671.mm.1 | NM_010729          | Lox1l    | lysyl oxidase-like 1                            | 58287723  | 58313212  | TC0900002391.mm.1 | 0.9  | 0.000425 |
| TC0100001676.mm.1 | NM_011639          | Trip6    | thyroid hormone receptor interactor 6           | 137309899 | 137314241 | TC0500003441.mm.1 | 0.2  | 0.000428 |
| TC0100001684.mm.1 | OTTMUST00000036996 | RP23-27  | ---                                             | 122219993 | 122220391 | TC0200001842.mm.1 | -0.9 | 0.000431 |
| TC0100001693.mm.1 | ENSMUST00000118272 | Rps12-p  | ribosomal protein S12, pseudogene 5             | 30263263  | 30263651  | TC0700000555.mm.1 | -0.9 | 0.000434 |

|                   |                    |         |                                                 |           |           |                    |      |          |
|-------------------|--------------------|---------|-------------------------------------------------|-----------|-----------|--------------------|------|----------|
| TC0100001711.mm.1 | ENSMUST00000175818 | Gm19815 | predicted gene, 19815                           | 90567423  | 90567757  | TC1700002733.mm.1  | -0.8 | 0.000435 |
| TC0100001720.mm.1 | XM_001479052       | Rps12l2 | ribosomal protein S12-like 2                    | 36025753  | 36026136  | TC0800000440.mm.1  | -0.9 | 0.000436 |
| TC0100001722.mm.1 | NM_001164787       | Sprr2a2 | small proline-rich protein 2A2                  | 92215835  | 92258373  | TC0300000821.mm.1  | -0.5 | 0.000438 |
| TC0100001724.mm.1 | NM_008482          | Lamb1   | laminin B1                                      | 31265234  | 31329644  | TC1200000263.mm.1  | 0.7  | 0.00044  |
| TC0100001731.mm.1 | ENSMUST00000121940 | Gm16471 | predicted gene 16471                            | 102138613 | 102139230 | TC0X00000991.mm.1  | -0.7 | 0.000441 |
| TC0100001745.mm.1 | ENSMUST00000120175 | Gm11830 | predicted gene 11830                            | 11144710  | 11145270  | TC0400000083.mm.1  | -0.6 | 0.000448 |
| TC0100001754.mm.1 | ENSMUST00000119767 | Rpl30-p | ribosomal protein L30, pseudogene 1             | 38376807  | 38377154  | TC0600000373.mm.1  | -0.7 | 0.000449 |
| TC0100001765.mm.1 | NM_016919          | Col5a3  | collagen, type V, alpha 3                       | 20770050  | 20815067  | TC0900001846.mm.1  | 0.3  | 0.000451 |
| TC0100001781.mm.1 | ENSMUST00000121692 | Rpl7a-p | ribosomal protein L7A, pseudogene 13            | 67726244  | 67726806  | TC0X00000606.mm.1  | -0.4 | 0.000452 |
| TC0100001790.mm.1 | ENSMUST00000118173 | Gm6274  | predicted gene 6274                             | 36668217  | 36669013  | TC0X00000324.mm.1  | -0.8 | 0.000455 |
| TC0100001793.mm.1 | ENSMUST00000118080 | Hspe1-p | heat shock protein 1 (chaperonin 10), pseudoger | 72955898  | 72956194  | TC0200001063.mm.1  | -0.4 | 0.000455 |
| TC0100001800.mm.1 | NM_017370          | Hp      | haptoglobin                                     | 109575128 | 109579172 | TC0800002905.mm.1  | 2.2  | 0.000458 |
| TC0100001804.mm.1 | NM_172780          | Slc9a6  | solute carrier family 9 (sodium/hydrogen exchan | 56609757  | 56664230  | TC0X00000522.mm.1  | 0.7  | 0.000459 |
| TC0100001819.mm.1 | OTTMUST00000044770 | RP24-21 | ---                                             | 125986966 | 125987364 | TC0X00002942.mm.1  | -1.0 | 0.000459 |
| TC0100001836.mm.1 | NM_023449          | Slc9a3r | solute carrier family 9 (sodium/hydrogen exchan | 24639282  | 24650305  | TC1700001634.mm.1  | 0.5  | 0.000459 |
| TC0100001838.mm.1 | NM_007639          | Cd1d1   | CD1d1 antigen                                   | 86995834  | 86999441  | TC0300002277.mm.1  | 1.0  | 0.00046  |
| TC0100001844.mm.1 | NM_001109913       | Hnrrpm  | heterogeneous nuclear ribonucleoprotein M       | 36946233  | 33685458  | TC1700002808.mm.1  | -0.8 | 0.000462 |
| TC0100001858.mm.1 | ENSMUST00000174777 | Gm8696  | predicted gene 8696                             | 34954328  | 34954712  | TC1700001934.mm.1  | -0.6 | 0.000463 |
| TC0100001865.mm.1 | NM_198649          | Ablim3  | actin binding LIM protein family, member 3      | 61799392  | 61911852  | TC1800001431.mm.1  | 0.7  | 0.000464 |
| TC0100001888.mm.1 | NM_007918          | Eif4ebp | eukaryotic translation initiation factor 4E bin | 27260327  | 27275656  | TC0800000353.mm.1  | 0.9  | 0.000467 |
| TC0100001907.mm.1 | XM_001002232       | Gm8264  | predicted gene 8264                             | 81818473  | 81818940  | TC1000002554.mm.1  | -0.9 | 0.000467 |
| TC0100001913.mm.1 | XM_984283          | Gm8137  | predicted gene 8137                             | 81852812  | 81853279  | TC1000002555.mm.1  | -0.9 | 0.000467 |
| TC0100001918.mm.1 | ENSMUST00000093326 | Gm5356  | predicted pseudogene 5356                       | 89186943  | 89187560  | TC0800002670.mm.1  | -0.4 | 0.00047  |
| TC0100001923.mm.1 | XR_035706          | Gm5879  | predicted gene 5879                             | 87764877  | 87766225  | TC0600002662.mm.1  | -1.0 | 0.000472 |
| TC0100001935.mm.1 | NM_009368          | Tgfb3   | transforming growth factor, beta 3              | 86056743  | 86079041  | TC1200002103.mm.1  | 0.5  | 0.000472 |
| TC0100001945.mm.1 | ENSMUST00000116491 | Gm14239 | predicted gene 14239                            | 155459501 | 155460892 | TC0200004960.mm.1  | -0.4 | 0.000473 |
| TC0100001946.mm.1 | ENSMUST00000160362 | Gm2976  | predicted gene 2976                             | 22479934  | 22480446  | TC0900001911.mm.1  | -0.7 | 0.000478 |
| TC0100001948.mm.1 | NM_008398          | Itga7   | integrin alpha 7                                | 128933813 | 128958286 | TC1000001626.mm.1  | 0.9  | 0.000484 |
| TC0100001949.mm.1 | NM_009204          | Slc2a4  | solute carrier family 2 (facilitated glucose tr | 69942286  | 69948190  | TC1100003078.mm.1  | 0.7  | 0.000484 |
| TC0100001952.mm.1 | ENSMUST00000121118 | Gm13529 | predicted gene 13529                            | 33652389  | 33652798  | TC0200003330.mm.1  | -0.8 | 0.000484 |
| TC0100001960.mm.1 | NM_028132          | Pgm2    | phosphoglucumutase 2                            | 99929414  | 99987294  | TC0400001010.mm.1  | 0.6  | 0.000485 |
| TC0100001961.mm.1 | NCBI_Gene:10004259 | Trav13n | Trav13n-2 T cell receptor alpha variable 13N-2  | 53253792  | 53254317  | TC1400002815.mm.1  | -0.7 | 0.000485 |
| TC0100001963.mm.1 | NM_020559          | Alas1   | aminolevulinic acid synthase 1                  | 106233455 | 106248126 | TC0900003004.mm.1  | 0.7  | 0.000493 |
| TC0100001975.mm.1 | ENSMUST00000118723 | Rps24-p | ribosomal protein S24, pseudogene 3             | 79195047  | 79195448  | TC0X00000793.mm.1  | -1.1 | 0.000493 |
| TC0100001978.mm.1 | NM_175236          | Adhfe1  | alcohol dehydrogenase, iron containing, 1       | 9547948   | 9577970   | TC0100000039.mm.1  | 1.4  | 0.000494 |
| TC0100001983.mm.1 | NM_007881          | Atn1    | atrophin 1                                      | 124742544 | 124756524 | TC0600003604.mm.1  | 0.2  | 0.000498 |
| TC0100001988.mm.1 | NM_172541          | Tmem120 | transmembrane protein 120A                      | 135735333 | 135744271 | TC0500003404.mm.1  | 0.6  | 0.000501 |
| TC0100001992.mm.1 | ENSMUST00000178147 | Gm6472  | predicted pseudogene 6472                       | 152909504 | 152910155 | TC0X00003201.mm.1  | -1.1 | 0.000509 |
| TC0100001999.mm.1 | ENSMUST00000118753 | Gm12832 | predicted gene 12832                            | 115543385 | 115545064 | TC0400003319.mm.1  | 0.6  | 0.000513 |
| TC0100002008.mm.1 | ENSMUST00000178248 | Gm2877  | predicted gene 2877                             | 3735760   | 3736963   | TC1400001368.mm.1  | -0.5 | 0.000519 |
| TC0100002011.mm.1 | ENSMUST00000162128 | Gm16111 | predicted gene 16111                            | 218890780 | 21890064  | TC0500000179.mm.1  | -0.9 | 0.000522 |
| TC0100002012.mm.1 | NM_031170          | Krt8    | keratin 8                                       | 101996709 | 102004342 | TC1500002282.mm.1  | -1.5 | 0.000523 |
| TC0100002021.mm.1 | NM_001289916       | Rora    | RAR-related orphan receptor alpha (Rora), trans | 0         | 0         | TSUnmapped0000004  | 0.7  | 0.000527 |
| TC0100002023.mm.1 | ENSMUST00000121305 | Gm11472 | predicted gene 11472                            | 167087184 | 167087739 | TC02000005182.mm.1 | -0.8 | 0.00053  |
| TC0100002027.mm.1 | ENSMUST00000119126 | Gm9078  | predicted gene 9078                             | 101062260 | 101063058 | TC0X00000967.mm.1  | -1.0 | 0.000531 |
| TC0100002028.mm.1 | ENSMUST00000166453 | Gm4462  | predicted gene 4462                             | 20664116  | 20664607  | TC1600000287.mm.1  | -0.9 | 0.000537 |
| TC0100002030.mm.1 | NM_138741          | Sdpr    | serum deprivation response                      | 51289126  | 51302960  | TC0100000372.mm.1  | 1.8  | 0.00054  |
| TC0100002031.mm.1 | NM_001081260       | Tnks1bp | tankyrase 1 binding protein 1                   | 85048022  | 85073048  | TC0200001230.mm.1  | 0.2  | 0.000542 |
| TC0100002033.mm.1 | ENSMUST00000179239 | Rps12-p | ribosomal protein S12, pseudogene 6             | 124349725 | 124350123 | TC0X00002932.mm.1  | -1.0 | 0.000546 |
| TC0100002034.mm.1 | OTTMUST00000044764 | RP23-32 | ---                                             | 124855729 | 124856127 | TC0X00002935.mm.1  | -1.0 | 0.000546 |
| TC0100002044.mm.1 | ENSMUST00000179067 | Rps12-p | ribosomal protein S12, pseudogene 17            | 125547773 | 125548171 | TC0X00002939.mm.1  | -1.0 | 0.000546 |
| TC0100002071.mm.1 | NM_013472          | Anxa6   | annexin A6                                      | 54978962  | 55033471  | TC1100002772.mm.1  | 1.2  | 0.000548 |
| TC0100002075.mm.1 | NM_021424          | Pvrl1   | poliovirus receptor-related 1                   | 43744576  | 43807461  | TC0900000492.mm.1  | -0.3 | 0.000549 |
| TC0100002076.mm.1 | ENSMUST00000119544 | H3f3a-p | H3 histone, family 3A, pseudogene 2             | 91114189  | 91114599  | TC1600002063.mm.1  | -0.9 | 0.000552 |
| TC0100002083.mm.1 | XM_620643          | Gm5908  | predicted gene 5908                             | 32476883  | 32477329  | TC0800001994.mm.1  | -0.8 | 0.000554 |
| TC0100002103.mm.1 | ENSMUST00000184303 | RP24-28 | N/A                                             | 72409268  | 72409878  | TC0900000965.mm.1  | -0.5 | 0.000559 |
| TC0100002109.mm.1 | ENSMUST00000121177 | Gm5383  | predicted gene 5383                             | 18942612  | 18943228  | TC0X00000195.mm.1  | -0.2 | 0.000577 |
| TC0100002110.mm.1 | ENSMUST00000121510 | Gm16436 | predicted gene 16436                            | 58630187  | 58632738  | TC0X00002286.mm.1  | -0.7 | 0.000578 |
| TC0100002115.mm.1 | NM_018825          | Sh2b2   | SH2B adaptor protein 2                          | 136218149 | 136244903 | TC0500003417.mm.1  | 0.3  | 0.000578 |
| TC0100002142.mm.1 | ENSMUST00000121367 | Rpl5-ps | ribosomal protein L5, pseudogene 1              | 14865072  | 14865965  | TC0100000081.mm.1  | -1.1 | 0.00058  |
| TC0100002145.mm.1 | NM_001163481       | Fkbp10  | FK506 binding protein 10                        | 100415694 | 100424840 | TC1100001624.mm.1  | 0.2  | 0.000583 |
| TC0100002150.mm.1 | NM_013901          | Slc39a1 | solute carrier family 39 (zinc transporter), me | 90248172  | 90253612  | TC0300000785.mm.1  | 0.6  | 0.000585 |
| TC0100002151.mm.1 | NM_011446          | Sox7    | SRY-box containing gene 7                       | 63943674  | 63950732  | TC1400000912.mm.1  | 0.3  | 0.000586 |
| TC0100002187.mm.1 | ENSMUST00000159343 | Gm16238 | predicted gene 16238                            | 127691935 | 127692522 | TC0300002913.mm.1  | -0.9 | 0.000588 |
| TC0100002193.mm.1 | NM_031176          | Tnxb    | tenascin XB                                     | 34670535  | 34719815  | TC1700000644.mm.1  | 0.8  | 0.000589 |
| TC0100002198.mm.1 | NM_175174          | Klhl5   | kelch-like 5                                    | 65107568  | 65168188  | TC0500000605.mm.1  | 0.5  | 0.000591 |
| TC0100002214.mm.1 | ENSMUST00000136332 | Gm6425  | predicted pseudogene 6425                       | 8588407   | 8589196   | TC1900001062.mm.1  | -0.4 | 0.000592 |
| TC0100002236.mm.1 | NR_033589          | Hmgb1-r | high mobility group box 1, related sequence 17  | 33484311  | 33485757  | TC0800000389.mm.1  | -0.6 | 0.000593 |
| TC0100002238.mm.1 | NM_032400          | Sucnr1  | succinate receptor 1                            | 60081869  | 60087566  | TC0300000484.mm.1  | 1.2  | 0.000594 |
| TC0100002239.mm.1 | ENSMUST00000119959 | Rpl31-p | ribosomal protein L31, pseudogene 6             | 123466509 | 123466886 | TC0500001420.mm.1  | -0.4 | 0.000597 |
| TC0100002243.mm.1 | ENSMUST00000119629 | Gm11979 | predicted gene 11979                            | 6785838   | 6786580   | TC1100002188.mm.1  | -0.6 | 0.0006   |
| TC0100002252.mm.1 | XR_105470          | Gm3625  | predicted gene 3625                             | 4586882   | 4602007   | TC1200001358.mm.1  | -0.8 | 0.000601 |
| TC0100002259.mm.1 | NM_001190258       | Gm9846  | predicted gene 9846                             | 114982366 | 114982739 | TC09000003179.mm.1 | -1.4 | 0.000605 |
| TC0100002268.mm.1 | NCBI_Gene:639655:p | Trav13d | T cell receptor alpha variable 13D-4            | 53072763  | 53073275  | TC1400000656.mm.1  | -0.4 | 0.000606 |
| TC0100002270.mm.1 | ENSMUST00000073014 | Gm8991  | predicted pseudogene 8991                       | 16729993  | 16731074  | TC0500001988.mm.1  | -1.1 | 0.000608 |
| TC0100002283.mm.1 | XM_003084518       | Gm14279 | predicted gene 14279                            | 157521696 | 157522028 | TC0200005020.mm.1  | -1.1 | 0.000608 |
| TC0100002284.mm.1 | NM_054042          | Cd248   | CD248 antigen, endosalin                        | 5068078   | 5070640   | TC1900000055.mm.1  | 1.0  | 0.000625 |
| TC0100002291.mm.1 | NM_021041          | Abcc9   | ATP-binding cassette, sub-family C (CFTR/MRP),  | 142587862 | 142702274 | TC0600003379.mm.1  | 0.9  | 0.000625 |

|                   |                    |         |                                                 |           |           |                    |      |          |
|-------------------|--------------------|---------|-------------------------------------------------|-----------|-----------|--------------------|------|----------|
| TC0100002294.mm.1 | NM_001270996       | Adam9   | a disintegrin and metallopeptidase domain 9 (m  | 24949611  | 25016922  | TC0800001901.mm.1  | 0.9  | 0.000628 |
| TC0100002297.mm.1 | ENSMUST00000074680 | Gm9000  | predicted gene 9000                             | 108670580 | 108671440 | TC1300001211.mm.1  | -0.9 | 0.000629 |
| TC0100002298.mm.1 | ENSMUST00000091531 | Gm5196  | predicted gene 5196                             | 66864524  | 66865075  | TC1300000812.mm.1  | -0.6 | 0.000634 |
| TC0100002301.mm.1 | NM_206882          | Hist3h2 | histone cluster 3, H2bb, pseudogene             | 58954048  | 58954512  | TC1100002837.mm.1  | -1.7 | 0.000634 |
| TC0100002311.mm.1 | NM_139303          | Kif18a  | kinesin family member 18A                       | 109280738 | 109341747 | TC0200001620.mm.1  | -0.6 | 0.00064  |
| TC0100002312.mm.1 | XM_884704          | Gm6109  | predicted gene 6109                             | 93448488  | 93448835  | TC1300001049.mm.1  | -0.7 | 0.00064  |
| TC0100002318.mm.1 | ENSMUST00000031305 | LOC1010 | uncharacterized LOC101055802                    | 118065360 | 118069710 | TC0500001305.mm.1  | 0.4  | 0.000642 |
| TC0100002321.mm.1 | OTTMUST00000112316 | RP23-10 | ---                                             | 6019022   | 6019468   | TC0700000064.mm.1  | -0.6 | 0.000645 |
| TC0100002330.mm.1 | NM_030565          | Fam20c  | family with sequence similarity 20, member C    | 138754514 | 138810077 | TC0500001663.mm.1  | 0.5  | 0.000645 |
| TC0100002336.mm.1 | NM_026764          | Gstm4   | glutathione S-transferase, mu 4                 | 108040408 | 108044894 | TC0300002728.mm.1  | 0.6  | 0.000645 |
| TC0100002340.mm.1 | ENSMUST00000091539 | Gm6917  | predicted gene 6917                             | 65894209  | 65894745  | TC1300002222.mm.1  | -0.6 | 0.000646 |
| TC0100002347.mm.1 | ENSMUST00000178911 | Gm8324  | predicted gene 8324                             | 34963267  | 3497570   | TC1400001364.mm.1  | -0.4 | 0.000653 |
| TC0100002348.mm.1 | ENSMUST00000184247 | Rpl15-p | ribosomal protein L15, pseudogene 2             | 72060937  | 72061549  | TC0900000954.mm.1  | -1.2 | 0.000654 |
| TC0100002350.mm.1 | ENSMUST00000179328 | Gm8807  | predicted gene 8807                             | 75182218  | 75182709  | TC1800001597.mm.1  | -1.0 | 0.000655 |
| TC0100002354.mm.1 | ENSMUST00000122361 | Gm12696 | predicted gene 12696                            | 97521428  | 97522332  | TC0400003104.mm.1  | -0.7 | 0.000655 |
| TC0100002355.mm.1 | ENSMUST00000080152 | Gm10131 | predicted pseudogene 10131                      | 34111143  | 34111736  | TC0800002022.mm.1  | -1.0 | 0.000656 |
| TC0100002357.mm.1 | ENSMUST00000072779 | Gm5805  | predicted gene 5805                             | 81972390  | 81972845  | TC1500000734.mm.1  | -0.8 | 0.000659 |
| TC0100002359.mm.1 | ENSMUST00000120752 | Gm3835  | predicted pseudogene 3835                       | 72429550  | 72429952  | TC0800002462.mm.1  | -0.8 | 0.000661 |
| TC0100002366.mm.1 | ENSMUST00000118761 | Gm14292 | predicted gene 14292                            | 179177425 | 179177880 | TC0200002768.mm.1  | -0.7 | 0.000662 |
| TC0100002371.mm.1 | ENSMUST00000082401 | mt-Ty   | mitochondrially encoded tRNA tyrosine           | 5260      | 5326      | TC0M000000024.mm.1 | 1.9  | 0.000671 |
| TC0100002372.mm.1 | NR_076393          | Gm6756  | 3-phosphoglycerate dehydrogenase pseudogene     | 36920305  | 36922207  | TC1800000351.mm.1  | 0.3  | 0.000673 |
| TC0100002377.mm.1 | NM_145480          | Rfc4    | replication factor C (activator 1) 4            | 23113943  | 23127737  | TC1600001390.mm.1  | -0.9 | 0.000675 |
| TC0100002384.mm.1 | NM_133977          | Trf     | transferrin                                     | 103204001 | 103230444 | TC0900003344.mm.1  | 1.9  | 0.000677 |
| TC0100002388.mm.1 | XR_104853          | Spr2a3  | small proline-rich protein 2A3                  | 92285446  | 92289254  | TC0300000822.mm.1  | -1.4 | 0.000678 |
| TC0100002395.mm.1 | ENSMUST00000096427 | LOC1010 | 60S ribosomal protein L7a-like                  | 93421682  | 93422488  | TC0100000934.mm.1  | -0.7 | 0.00068  |
| TC0100002445.mm.1 | NM_011122          | Plod1   | procollagen-lysine, 2-oxoglutarate 5-dioxygenas | 147909753 | 147936776 | TC0400004004.mm.1  | 0.6  | 0.000684 |
| TC0100002450.mm.1 | NM_001163472       | Cyp2d22 | cytochrome P450, family 2, subfamily d, polypep | 82370527  | 82380260  | TC1500001944.mm.1  | 0.5  | 0.000688 |
| TC0100002451.mm.1 | XM_358238          | Gm5396  | predicted pseudogene 5396                       | 153112896 | 153113462 | TC0X00003205.mm.1  | -0.8 | 0.00069  |
| TC0100002453.mm.1 | NM_013647          | Rps16   | ribosomal protein S16                           | 28350652  | 28352698  | TC0700000495.mm.1  | -0.5 | 0.000695 |
| TC0100002460.mm.1 | ENSMUST00000180186 | Gm15387 | predicted gene 15387                            | 74093183  | 74094402  | TC1500001705.mm.1  | -1.2 | 0.000695 |
| TC0100002470.mm.1 | ENSMUST00000176461 | Gm5871  | predicted gene 5871                             | 109016198 | 109016915 | TC0500002961.mm.1  | -0.4 | 0.000697 |
| TC0100002472.mm.1 | NM_027182          | Trip13  | thyroid hormone receptor interactor 13          | 73912462  | 73937767  | TC1300002306.mm.1  | -0.4 | 0.000699 |
| TC0100002473.mm.1 | NM_181588          | Cmb1    | carboxymethylenebutenolidase-like (Pseudomor    | 31568791  | 31590119  | TC1500000207.mm.1  | 1.5  | 0.000704 |
| TC0100002477.mm.1 | ENSMUST00000176164 | Gm3307  | predicted gene 3307                             | 63606019  | 63606650  | TC0700000969.mm.1  | -1.0 | 0.000707 |
| TC0100002481.mm.1 | ENSMUST00000121434 | Gm14052 | predicted gene 14052                            | 132099869 | 132100899 | TC0200002029.mm.1  | -0.5 | 0.000711 |
| TC0100002483.mm.1 | NM_023887          | Gcnt2   | glucosaminyl (N-acetyl) transferase 2, I-branch | 40859768  | 40960892  | TC1300000460.mm.1  | 0.6  | 0.000713 |
| TC0100002495.mm.1 | ENSMUST00000110225 | Gm11037 | predicted gene 11037                            | 131133497 | 131134215 | TC0200002006.mm.1  | 0.4  | 0.000715 |
| TC0100002496.mm.1 | XR_105665          | Gm5144  | predicted gene 5144                             | 11906519  | 11907396  | TC1500000094.mm.1  | 0.3  | 0.000728 |
| TC0100002498.mm.1 | NM_021320          | Ntn4    | netrin 4                                        | 93640681  | 93747207  | TC1000001138.mm.1  | 0.3  | 0.00073  |
| TC0100002538.mm.1 | NM_178373          | Cidec   | cell death-inducing DFFA-like effector c        | 113424634 | 113435760 | TC0600002920.mm.1  | 2.3  | 0.000733 |
| TC0100002544.mm.1 | NM_0208299         | 2700029 | RIKEN cDNA 2700029M09 gene                      | 60907580  | 60907580  | TC0800000648.mm.1  | -0.4 | 0.000739 |
| TC0100002552.mm.1 | ENSMUST00000117119 | Rpl30-p | ribosomal protein L30, pseudogene 10            | 71803688  | 71804034  | TC0X00000655.mm.1  | -0.7 | 0.000745 |
| TC0100002554.mm.1 | NCBI_Gene:10012643 | Trgj3   | T cell receptor gamma joining 3                 | 19257117  | 19257176  | TC1300000143.mm.1  | -1.3 | 0.000747 |
| TC0100002574.mm.1 | NM_009537          | Yy1     | YY1 transcription factor                        | 108792973 | 108816632 | TC1200001113.mm.1  | -0.5 | 0.000749 |
| TC0100002581.mm.1 | NM_029823          | Arxes2  | adipocyte-related X-chromosome expressed seq    | 135993820 | 135995359 | TC0X00001316.mm.1  | 1.3  | 0.000749 |
| TC0100002582.mm.1 | ENSMUST00000160070 | Rpl30-p | ribosomal protein L30, pseudogene 2             | 22230902  | 22231192  | TC0800001865.mm.1  | -0.7 | 0.000756 |
| TC0100002587.mm.1 | ENSMUST00000118446 | Rpsa-ps | ribosomal protein SA, pseudogene 11             | 59162268  | 59163156  | TC0400002749.mm.1  | -0.5 | 0.000762 |
| TC0100002598.mm.1 | ENSMUST00000134617 | Gm12254 | predicted gene 12254                            | 58508791  | 58509261  | TC1100002822.mm.1  | -0.9 | 0.000764 |
| TC0100002601.mm.1 | XM_619114          | Gm5792  | predicted pseudogene 5792                       | 65416599  | 65417147  | TC1300000794.mm.1  | -0.5 | 0.000766 |
| TC0100002604.mm.1 | ENSMUST00000076373 | Gm8730  | predicted pseudogene 8730                       | 102864779 | 102865853 | TC0800002790.mm.1  | -1.0 | 0.000771 |
| TC0100002608.mm.1 | ENSMUST00000027231 | Slc9a2  | solute carrier family 9 (sodium/hydrogen exchan | 40681712  | 40768885  | TC0100000302.mm.1  | -0.3 | 0.000772 |
| TC0100002623.mm.1 | NM_008715          | Ints6   | integrator complex subunit 6                    | 62676325  | 62761115  | TC1400002208.mm.1  | -0.3 | 0.000775 |
| TC0100002639.mm.1 | NM_133675          | Sptssb  | serine palmitoyltransferase, small subunit B    | 69819538  | 69859896  | TC0300002143.mm.1  | -0.3 | 0.000775 |
| TC0100002641.mm.1 | ENSMUST00000071235 | Gm10064 | predicted gene 10064                            | 122697196 | 122697603 | TC0500003218.mm.1  | -0.9 | 0.000777 |
| TC0100002642.mm.1 | NM_009176          | St3gal3 | ST3 beta-galactoside alpha-2,3-sialyltransferas | 117932153 | 118134946 | TC0400003383.mm.1  | 0.6  | 0.00079  |
| TC0100002647.mm.1 | NM_009804          | Cat     | catalase                                        | 103453849 | 103485160 | TC0200004227.mm.1  | 1.6  | 0.00079  |
| TC0100002668.mm.1 | NM_027371          | Rpf1    | ribosome production factor 1 homolog (S. cerevi | 146506344 | 146521423 | TC0300003101.mm.1  | -0.7 | 0.000794 |
| TC0100002671.mm.1 | NM_025541          | Asf1a   | ASF1 anti-silencing function 1 homolog A (S. ce | 53596961  | 53609225  | TC1000000484.mm.1  | -0.8 | 0.000797 |
| TC0100002690.mm.1 | ENSMUST00000165131 | Gm6665  | predicted gene 6665                             | 31819862  | 31820413  | TC1800001116.mm.1  | 1.3  | 0.000799 |
| TC0100002702.mm.1 | ENSMUST00000117283 | Gm15198 | predicted gene 15198                            | 42435880  | 42436065  | TC1000000381.mm.1  | -0.6 | 0.000805 |
| TC0100002721.mm.1 | NM_001033466       | Zbtb2   | zinc finger and BTB domain containing 2         | 4367074   | 4388108   | TC1000001675.mm.1  | -0.3 | 0.000808 |
| TC0100002740.mm.1 | NCBI_Gene:107574:p | Tcrg-C2 | T-cell receptor gamma, constant 2               | 19304649  | 19337169  | TC1300001519.mm.1  | -1.2 | 0.000812 |
| TC0100002742.mm.1 | NM_011469          | Spr2b   | small proline-rich protein 2B                   | 92316705  | 92318085  | TC0300000823.mm.1  | -0.5 | 0.000815 |
| TC0100002752.mm.1 | ENSMUST00000184467 | RP23-29 | N/A                                             | 72209555  | 72210170  | TC0900000958.mm.1  | -0.7 | 0.000817 |
| TC0100002761.mm.1 | NM_178795          | Ppip5k1 | diphosphoinositol pentakisphosphate kinase 1    | 121310561 | 121355396 | TC0200004485.mm.1  | 0.4  | 0.00082  |
| TC0100002775.mm.1 | NM_030013          | Cyp20a1 | cytochrome P450, family 20, subfamily a, polype | 60343323  | 60388060  | TC0100000469.mm.1  | 0.6  | 0.00082  |
| TC0100002776.mm.1 | ENSMUST00000040649 | Gm10052 | predicted pseudogene 10052                      | 123689230 | 123690192 | TC0900003309.mm.1  | -1.2 | 0.000824 |
| TC0100002798.mm.1 | NM_008059          | G052    | G0/G1 switch gene 2                             | 193272160 | 193273188 | TC0100003838.mm.1  | 0.8  | 0.000826 |
| TC0100002800.mm.1 | ENSMUST00000121173 | Gm11765 | predicted gene 11765                            | 81455943  | 81461732  | TC0400002920.mm.1  | -0.2 | 0.000828 |
| TC0100002801.mm.1 | XR_141286          | Gm10808 | predicted gene 10808                            | 45128531  | 45130874  | TC1600000669.mm.1  | 0.7  | 0.000832 |
| TC0100002805.mm.1 | NM_008567          | Mcm6    | minichromosome maintenance deficient 6 (MIS5    | 128331590 | 128359664 | TC0100003026.mm.1  | -1.2 | 0.000837 |
| TC0100002837.mm.1 | ENSMUST00000173370 | Hmg1l1  | high-mobility group (nonhistone chromosomal) I  | 42020836  | 42021483  | TC0700000735.mm.1  | -1.2 | 0.000843 |
| TC0100002840.mm.1 | XR_105934          | Gm19389 | predicted gene, 19389                           | 23310020  | 23659719  | TC1800000179.mm.1  | 0.2  | 0.000853 |
| TC0100002841.mm.1 | NR_030454          | Mir684- | microRNA 684-1                                  | 80628705  | 80628790  | TC0200003841.mm.1  | -1.1 | 0.000858 |
| TC0100002842.mm.1 | NM_030152          | Nol3    | nucleolar protein 3 (apoptosis repressor with C | 105276420 | 105281939 | TC0800001210.mm.1  | 0.4  | 0.000862 |
| TC0100002844.mm.1 | ENSMUST00000050143 | Gm7729  | predicted gene 7729                             | 27598644  | 27599759  | TC1800000226.mm.1  | -1.1 | 0.000869 |
| TC0100002849.mm.1 | OTTMUST00000044462 | RP23-34 | ---                                             | 114980970 | 114981317 | TC0X00002888.mm.1  | -0.6 | 0.000869 |
| TC0100002852.mm.1 | ENSMUST00000179326 | Gm5473  | predicted pseudogene 5473                       | 63631697  | 63632338  | TC1500000462.mm.1  | -1.2 | 0.000873 |

|                   |                    |         |                                                 |           |           |                    |      |          |
|-------------------|--------------------|---------|-------------------------------------------------|-----------|-----------|--------------------|------|----------|
| TC0100002863.mm.1 | XM_356811          | Gm5215  | predicted gene 5215                             | 54311961  | 54312365  | TC1500001529.mm.1  | -0.4 | 0.000881 |
| TC0100002868.mm.1 | NM_011587          | Tie1    | tyrosine kinase with immunoglobulin-like and EC | 118471191 | 118490061 | TC0400003393.mm.1  | 0.5  | 0.000882 |
| TC0100002873.mm.1 | NM_027541          | Prpf3   | PRP3 pre-mRNA processing factor 3 homolog (ye   | 95830124  | 95855885  | TC0300002487.mm.1  | -0.2 | 0.000883 |
| TC0100002877.mm.1 | ENSMUST00000116122 | Rps19-p | ribosomal protein S19, pseudogene 7             | 140073032 | 140073469 | TC0200004727.mm.1  | -0.6 | 0.000886 |
| TC0100002880.mm.1 | NM_013662          | Sema6b  | sema domain, transmembrane domain (TM), an      | 56123085  | 56140343  | TC1700002316.mm.1  | 0.2  | 0.000889 |
| TC0100002890.mm.1 | NM_025558          | Cyb5b   | cytochrome b5 type B                            | 107150640 | 107187471 | TC0800001265.mm.1  | 0.8  | 0.000892 |
| TC0100002895.mm.1 | XM_886771          | Gm6314  | predicted pseudogene 6314                       | 140315666 | 140316058 | TC0700002009.mm.1  | -0.4 | 0.000893 |
| TC0100002902.mm.1 | NM_009673          | Anxa5   | annexin A5                                      | 36448923  | 36475887  | TC0300001850.mm.1  | 1.1  | 0.000896 |
| TC0100002903.mm.1 | ENSMUST00000172249 | Gm7803  | predicted gene 7803                             | 50325517  | 50326532  | TC0X00002180.mm.1  | -1.0 | 0.000897 |
| TC0100002904.mm.1 | NM_011803          | Klf6    | Kruppel-like factor 6                           | 5861489   | 5870393   | TC1300000028.mm.1  | 0.5  | 0.000906 |
| TC0100002909.mm.1 | ENSMUST00000121664 | Gm13445 | predicted gene 13445                            | 35491213  | 35491519  | TC0200003369.mm.1  | -0.6 | 0.000915 |
| TC0100002912.mm.1 | ENSMUST00000162550 | Gm16550 | predicted gene 16550                            | 165148824 | 165148949 | TC0100003438.mm.1  | -1.2 | 0.000916 |
| TC0100002921.mm.1 | NM_010358          | Gstm1   | glutathione S-transferase, mu 1                 | 108012250 | 108017973 | TC0300002725.mm.1  | 1.9  | 0.000917 |
| TC0100002929.mm.1 | ENSMUST00000177590 | Rpl3-ps | ribosomal protein L3, pseudogene 1              | 13202546  | 13203838  | TC0X00000164.mm.1  | -1.1 | 0.000918 |
| TC0100002936.mm.1 | ENSMUST00000073722 | Gm10073 | predicted pseudogene 10073                      | 106572966 | 106573461 | TC0800002858.mm.1  | -0.8 | 0.000921 |
| TC0100002945.mm.1 | NCBI_Gene:434036:p | Igkv13- | Igkv13-85 immunoglobulin kappa chain variable   | 68930269  | 68930734  | TC0600003552.mm.1  | -0.9 | 0.000923 |
| TC0100002964.mm.1 | ENSMUST00000120015 | Gm6461  | predicted gene 6461                             | 115443399 | 115444031 | TC0X00002891.mm.1  | -0.7 | 0.000924 |
| TC0100002965.mm.1 | NM_033602          | Peli2   | pellino 2                                       | 48120869  | 48260883  | TC1400000524.mm.1  | 0.4  | 0.000926 |
| TC0100002967.mm.1 | NM_010498          | Ids     | iduronate 2-sulfatase                           | 70343069  | 70365085  | TC0X00002384.mm.1  | 0.5  | 0.000933 |
| TC0100002973.mm.1 | ENSMUST00000118690 | Gm12901 | predicted gene 12901                            | 123258046 | 123258904 | TC0400001394.mm.1  | -0.5 | 0.000943 |
| TC0100002980.mm.1 | ENSMUST00000135190 | Gm8292  | predicted gene 8292                             | 55353567  | 55335883  | TC0100000403.mm.1  | -0.6 | 0.000956 |
| TC0100002993.mm.1 | NM_194344          | Sh3tc1  | SH3 domain and tetratricopeptide repeats 1      | 35729276  | 35729276  | TC0500002253.mm.1  | 0.3  | 0.000957 |
| TC0100003006.mm.1 | NM_009712          | Arsb    | arylsulfatase B                                 | 93771679  | 93943016  | TC1300001052.mm.1  | 0.6  | 0.000959 |
| TC0100003026.mm.1 | ENSMUST00000087137 | Gm7335  | predicted gene 7335                             | 37713521  | 37713929  | TC1700002079.mm.1  | 0.5  | 0.000959 |
| TC0100003029.mm.1 | NM_053269          | Rad51c  | RAD51 homolog C                                 | 87376645  | 87404954  | TC1100003478.mm.1  | -0.3 | 0.000961 |
| TC0100003031.mm.1 | NM_001110205       | Acrv1   | activin A receptor, type 1                      | 58388644  | 58567157  | TC0200003579.mm.1  | 0.2  | 0.000965 |
| TC0100003032.mm.1 | NM_028222          | Cdkn3   | cyclin-dependent kinase inhibitor 3             | 46760541  | 46771525  | TC1400000501.mm.1  | -0.8 | 0.000965 |
| TC0100003051.mm.1 | NM_028677          | Ppih    | peptidyl prolyl isomerase H                     | 119300010 | 119320546 | TC0400003422.mm.1  | -0.7 | 0.000967 |
| TC0100003052.mm.1 | NM_009443          | Tgoln1  | trans-golgi network protein                     | 72495397  | 72617000  | TC0600002492.mm.1  | 1.0  | 0.000968 |
| TC0100003055.mm.1 | NM_145546          | Gtf2b   | general transcription factor IIB                | 142765226 | 142783606 | TC0300001449.mm.1  | -0.6 | 0.00098  |
| TC0100003056.mm.1 | NR_002883          | Gm5643  | heterogeneous nuclear ribonucleoprotein A1 ps   | 142297505 | 142299237 | TC0X00001403.mm.1  | -0.7 | 0.000981 |
| TC0100003058.mm.1 | NM_024264          | Cyp27a1 | cytochrome P450, family 27, subfamily a, polype | 74713574  | 74737892  | TC0100000642.mm.1  | 0.6  | 0.000983 |
| TC0100003062.mm.1 | NM_001165971       | Gm5803  | predicted gene 5803                             | 22713820  | 22714984  | TC1500001262.mm.1  | -0.7 | 0.000986 |
| TC0100003064.mm.1 | ENSMUST00000118281 | Hmgb1-p | high mobility group box 1, pseudogene 4         | 6592602   | 6593236   | TC1900001015.mm.1  | -1.2 | 0.000988 |
| TC0100003069.mm.1 | ENSMUST00000119643 | Gm6758  | predicted gene 6758                             | 74135133  | 74136187  | TC0X00003433.mm.1  | -0.9 | 0.000989 |
| TC0100003090.mm.1 | NM_028048          | Slc25a3 | solute carrier family 25, member 35             | 68968131  | 68974365  | TC1100000887.mm.1  | 0.6  | 0.000991 |
| TC0100003092.mm.1 | NM_033444          | Clic1   | chloride intracellular channel 1                | 35049966  | 35058749  | TC1700000662.mm.1  | -0.7 | 0.000994 |
| TC0100003094.mm.1 | NR_030454_4        | Gm10241 | predicted pseudogene 10241                      | 24257528  | 24257612  | TC0500000210.mm.1  | -1.1 | 0.000998 |
| TC0100003095.mm.1 | NR_030454_3        | Gm10241 | predicted pseudogene 10241                      | 127398916 | 127399000 | TC0700001845.mm.1  | -1.1 | 0.000998 |
| TC0100003099.mm.1 | NR_030454_2        | Gm10241 | predicted pseudogene 10241                      | 7753089   | 7753173   | TC0X00000067.mm.1  | -1.1 | 0.000998 |
| TC0100003102.mm.1 | NR_030454_9        | Gm10241 | predicted pseudogene 10241                      | 129665839 | 129665839 | TC1100001650.mm.1  | -1.1 | 0.000998 |
| TC0100003106.mm.1 | NR_030454_7        | Gm10241 | predicted pseudogene 10241                      | 75065907  | 75065991  | TC1100003211.mm.1  | -1.1 | 0.000998 |
| TC0100003108.mm.1 | NM_145468          | Skp2    | S-phase kinase-associated protein 2 (p45)       | 9111982   | 9155425   | TC1500001192.mm.1  | -0.4 | 0.001001 |
| TC0100003121.mm.1 | NM_001190403       | Amy2b   | amylase 2b                                      | 113147656 | 113156727 | TC0300002778.mm.1  | 0.4  | 0.001012 |
| TC0100003125.mm.1 | ENSMUST00000117715 | Gm11971 | predicted gene 11971                            | 6453151   | 6453438   | TC1100000098.mm.1  | -0.9 | 0.001014 |
| TC0100003138.mm.1 | NM_008252          | Hmgb2   | high mobility group box 2                       | 57511843  | 57515999  | TC0800000629.mm.1  | -1.2 | 0.001015 |
| TC0100003145.mm.1 | ENSMUST00000072429 | Rps10-p | ribosomal protein S10, pseudogene 2             | 20822103  | 20822677  | TC1600001355.mm.1  | -0.9 | 0.001018 |
| TC0100003154.mm.1 | NM_011830          | Impdh2  | inosine 5-phosphate dehydrogenase 2             | 108560491 | 108565573 | TC0900001414.mm.1  | -0.7 | 0.001019 |
| TC0100003157.mm.1 | NM_007640          | Cd1d2   | CD1d2 antigen                                   | 86986586  | 86989533  | TC0300000689.mm.1  | 1.0  | 0.001019 |
| TC0100003159.mm.1 | NM_001172093       | Depdc1a | DEP domain containing 1a                        | 159495433 | 159529955 | TC0300001587.mm.1  | -1.0 | 0.00102  |
| TC0100003161.mm.1 | NM_133692          | Pold3   | polymerase (DNA-directed), delta 3, accessory s | 100082111 | 100121565 | TC0700003815.mm.1  | -0.4 | 0.001024 |
| TC0100003166.mm.1 | NM_021355          | Fmod    | fibromodulin                                    | 134037254 | 134048277 | TC0100001218.mm.1  | 0.4  | 0.001026 |
| TC0100003178.mm.1 | ENSMUST00000120650 | Gm14926 | predicted gene 14926                            | 119413252 | 119413989 | TC0X00001170.mm.1  | -0.7 | 0.00103  |
| TC0100003180.mm.1 | XR_140792          | Gm9794  | predicted pseudogene 9794                       | 66875262  | 66875759  | TC0600002420.mm.1  | -0.7 | 0.001032 |
| TC0100003190.mm.1 | NM_001111058       | Cd33    | CD33 antigen                                    | 43527456  | 43544428  | TC0700002950.mm.1  | 0.3  | 0.001042 |
| TC0100003191.mm.1 | NM_007392          | Acta2   | actin, alpha 2, smooth muscle, aorta            | 34240336  | 34255373  | TC1900001415.mm.1  | 1.3  | 0.001049 |
| TC0100003192.mm.1 | NM_016744          | Pde1a   | phosphodiesterase 1A, calmodulin-dependent      | 79834453  | 80129458  | TC0200003830.mm.1  | 0.6  | 0.001051 |
| TC0100003193.mm.1 | ENSMUST00000032395 | Gm7399  | predicted gene 7399                             | 59806557  | 59807414  | TC1000000539.mm.1  | -0.9 | 0.001056 |
| TC0100003209.mm.1 | ENSMUST00000121704 | Gm5832  | predicted gene 5832                             | 88022381  | 88023962  | TC0100000834.mm.1  | -0.5 | 0.001066 |
| TC0100003210.mm.1 | NM_009849          | Entpd2  | ectonucleoside triphosphate diphosphohydrolas   | 25395874  | 25401323  | TC02000005462.mm.1 | 0.4  | 0.001066 |
| TC0100003211.mm.1 | NM_010664          | Krt18   | keratin 18                                      | 102028216 | 102032026 | TC1500001084.mm.1  | -1.8 | 0.001067 |
| TC0100003212.mm.1 | NM_011607          | Tnc     | tenascin C                                      | 63959785  | 64047015  | TC0400002812.mm.1  | -1.0 | 0.001077 |
| TC0100003223.mm.1 | NM_018743          | Agpat6  | 1-acylglycerol-3-phosphate O-acyltransferase 6  | 23172946  | 23208453  | TC0800001883.mm.1  | 0.4  | 0.001085 |
| TC0100003232.mm.1 | NM_133659          | Erg     | avian erythroblastosis virus E-26 (v-ets) oncog | 95359169  | 95586593  | TC1600002128.mm.1  | 0.6  | 0.001085 |
| TC0100003240.mm.1 | NM_010144          | Ephb4   | Eph receptor B4                                 | 137350109 | 137378669 | TC0500001623.mm.1  | 0.3  | 0.001087 |
| TC0100003242.mm.1 | NM_001013578       | Thoc7   | THO complex 7 homolog (Drosophila)              | 13949012  | 13961313  | TC1400001470.mm.1  | -0.3 | 0.001087 |
| TC0100003249.mm.1 | NM_009502          | Vcl     | vinculin                                        | 20929433  | 21033673  | TC1400000177.mm.1  | 0.9  | 0.001089 |
| TC0100003254.mm.1 | NM_001161457       | Cbfb    | core binding factor beta                        | 105170674 | 105217989 | TC0800001204.mm.1  | -0.6 | 0.001089 |
| TC0100003259.mm.1 | XR_002363          | Gm5601  | predicted pseudogene 5601                       | 119739914 | 119742226 | TC0700001714.mm.1  | -0.7 | 0.001089 |
| TC0100003267.mm.1 | ENSMUST00000119032 | Gm12034 | predicted gene 12034                            | 20446412  | 20446810  | TC1100000197.mm.1  | -0.7 | 0.0011   |
| TC0100003272.mm.1 | NM_008613          | Mns1    | meiosis-specific nuclear structural protein 1   | 72438011  | 72459199  | TC0900000966.mm.1  | -0.9 | 0.001105 |
| TC0100003280.mm.1 | NM_181390          | Mustn1  | musculoskeletal, embryonic nuclear protein 1    | 30879257  | 30881610  | TC1400000316.mm.1  | 0.6  | 0.001106 |
| TC0100003289.mm.1 | ENSMUST00000121084 | Smt3h2- | SMT3 suppressor of mif two 3 homolog 2, pseud   | 7752130   | 7752414   | TC0X00000066.mm.1  | -0.9 | 0.001106 |
| TC0100003293.mm.1 | ENSMUST00000121596 | Gm12912 | predicted gene 12912                            | 75147609  | 75148989  | TC0400000786.mm.1  | -0.5 | 0.001107 |
| TC0100003300.mm.1 | NM_030166          | Galnt15 | UDP-N-acetyl-alpha-D-galactosamine:polypeptid   | 32028989  | 32062197  | TC1400000336.mm.1  | 0.4  | 0.001129 |
| TC0100003301.mm.1 | ENSMUST00000181079 | Ptma-ps | prothymosin alpha, pseudogene 1                 | 24063832  | 24064164  | TC0700000366.mm.1  | -0.7 | 0.001132 |
| TC0100003315.mm.1 | ENSMUST00000117834 | Gm12859 | predicted gene 12859                            | 118490782 | 118497642 | TC0400003394.mm.1  | -0.4 | 0.001134 |
| TC0100003316.mm.1 | NM_175501          | Adamts1 | a disintegrin-like and metallopeptidase (reprol | 11064790  | 11346867  | TC1500000090.mm.1  | 0.7  | 0.001134 |

|                   |                    |         |                                                 |           |           |                    |      |          |
|-------------------|--------------------|---------|-------------------------------------------------|-----------|-----------|--------------------|------|----------|
| TC0100003321.mm.1 | ENSMUST00000104977 | Gm4877  | predicted gene 4877                             | 42519516  | 42520325  | TC0600002173.mm.1  | -0.3 | 0.001136 |
| TC0100003342.mm.1 | BC052077           | Prpf38b | PRP38 pre-mRNA processing factor 38 (yeast) dc  | 108902667 | 108911727 | TC0300002756.mm.1  | -0.5 | 0.001141 |
| TC0100003343.mm.1 | NM_025914          | Actr6   | ARP6 actin-related protein 6                    | 89711971  | 89732295  | TC1000002660.mm.1  | -0.3 | 0.001142 |
| TC0100003351.mm.1 | NM_207624          | Ace     | angiotensin I converting enzyme (peptidyl-dipep | 105967945 | 105989964 | TC1100001767.mm.1  | 1.2  | 0.001145 |
| TC0100003361.mm.1 | NM_016740          | S100a11 | S100 calcium binding protein A11 (calgizzarin)  | 93520488  | 93526288  | TC0300000852.mm.1  | 1.3  | 0.001149 |
| TC0100003367.mm.1 | NR_035452          | Mir1931 | microRNA 1931                                   | 93162785  | 93162903  | TC1000001125.mm.1  | -0.5 | 0.001151 |
| TC0100003370.mm.1 | ENSMUST00000116005 | Gm11951 | predicted gene 11951                            | 3633012   | 3633442   | TC1100002095.mm.1  | 1.0  | 0.001162 |
| TC0100003376.mm.1 | NM_175225          | Tasp1   | taspase, threonine aspartase 1                  | 139833479 | 140066805 | TC0200004725.mm.1  | -0.2 | 0.001175 |
| TC0100003398.mm.1 | NM_177342          | Taf5    | TAF5 RNA polymerase II, TATA box binding prote  | 47067748  | 47083479  | TC1900000717.mm.1  | -0.5 | 0.001178 |
| TC0100003401.mm.1 | ENSMUST00000160969 | Gm15795 | predicted gene 15795                            | 20444258  | 20444560  | TC0100002030.mm.1  | -1.1 | 0.001181 |
| TC0100003408.mm.1 | NM_020587          | Srsf4   | serine/arginine-rich splicing factor 4          | 131873617 | 131901725 | TC0400001570.mm.1  | -0.5 | 0.001184 |
| TC0100003412.mm.1 | NM_001081187       | Htra4   | Htra4 serine peptidase 4                        | 25024928  | 25038962  | TC0800001902.mm.1  | 0.5  | 0.001189 |
| TC0100003422.mm.1 | ENSMUST00000079841 | Rps6-ps | ribosomal protein S6, pseudogene 2              | 88806391  | 88807140  | TC0800001039.mm.1  | -0.5 | 0.001189 |
| TC0100003432.mm.1 | NM_025844          | Chordc1 | cysteine and histidine-rich domain (CHORD)-con  | 18292267  | 18314001  | TC0900000132.mm.1  | -0.6 | 0.001195 |
| TC0100003438.mm.1 | NM_022420          | Gprc5b  | G protein-coupled receptor, family C, group 5,  | 118972040 | 118995211 | TC07000004179.mm.1 | 0.5  | 0.001196 |
| TC0100003439.mm.1 | NM_001040611       | Peg10   | paternally expressed 10                         | 4747306   | 4760517   | TC0600000014.mm.1  | 0.7  | 0.001201 |
| TC0100003454.mm.1 | NM_011580          | Thbs1   | thrombospondin 1                                | 118111876 | 118127133 | TC0200001729.mm.1  | 1.4  | 0.001203 |
| TC0100003469.mm.1 | NM_008029          | Flt4    | FMS-like tyrosine kinase 4                      | 49609263  | 49652739  | TC1100000519.mm.1  | 0.2  | 0.00121  |
| TC0100003474.mm.1 | NM_009780          | C4b     | complement component 4B (Chido blood group)     | 34728380  | 34743897  | TC1700002814.mm.1  | 1.7  | 0.001211 |
| TC0100003477.mm.1 | NM_027695          | Oxsm    | 3-oxoacyl-ACP synthase, mitochondrial           | 16238656  | 16249808  | TC1400001486.mm.1  | 0.4  | 0.001221 |
| TC0100003478.mm.1 | NM_013415          | Atp1b2  | ATPase, Na+/K+ transporting, beta 2 polypeptide | 69599736  | 69605960  | TC1100003049.mm.1  | 0.2  | 0.001227 |
| TC0100003482.mm.1 | ENSMUST00000117924 | Gm14512 | predicted gene 14512                            | 11984475  | 11984650  | TC0X00000148.mm.1  | -0.3 | 0.001229 |
| TC0100003498.mm.1 | ENSMUST00000118662 | Gm15616 | predicted gene 15616                            | 72047205  | 72047579  | TC0500000667.mm.1  | -1.0 | 0.00123  |
| TC0100003503.mm.1 | NM_027816          | Cyp2u1  | cytochrome P450, family 2, subfamily u, polypep | 131290491 | 131303227 | TC0300002957.mm.1  | 0.3  | 0.001231 |
| TC0100003505.mm.1 | ENSMUST00000119478 | Gm12852 | predicted gene 12852                            | 99103060  | 99103778  | TC04000003126.mm.1 | -0.6 | 0.001233 |
| TC0100003514.mm.1 | ENSMUST00000164671 | Gm17450 | predicted gene, 17450                           | 91220452  | 91220878  | TC1300001018.mm.1  | -0.4 | 0.001243 |
| TC0100003516.mm.1 | XM_003085105       | Gm20056 | predicted gene, 20056                           | 32408524  | 32409057  | TC1600000441.mm.1  | 0.9  | 0.001248 |
| TC0100003518.mm.1 | ENSMUST00000120953 | Gm13413 | predicted gene 13413                            | 32406055  | 32406656  | TC0200000580.mm.1  | -1.3 | 0.001248 |
| TC0100003520.mm.1 | ENSMUST00000076166 | Rpl30-p | ribosomal protein L30, pseudogene 8             | 99047230  | 99047577  | TC1200000979.mm.1  | -0.7 | 0.001255 |
| TC0100003521.mm.1 | ENSMUST00000120104 | Gm12129 | predicted gene 12129                            | 38219069  | 38220215  | TC1100000396.mm.1  | -0.7 | 0.001258 |
| TC0100003524.mm.1 | ENSMUST00000097581 | Gm10540 | predicted gene 10540                            | 45285833  | 45286108  | TC1800001285.mm.1  | -0.8 | 0.001259 |
| TC0100003528.mm.1 | NM_146090          | Zadh2   | zinc binding alcohol dehydrogenase, domain con  | 84088158  | 84097514  | TC1800000884.mm.1  | 0.5  | 0.001265 |
| TC0100003531.mm.1 | NM_207298          | Cercam  | cerebral endothelial cell adhesion molecule     | 29869164  | 29882840  | TC0200000514.mm.1  | 0.2  | 0.001268 |
| TC0100003539.mm.1 | NR_029733          | Mir15a  | microRNA 15a                                    | 61632027  | 61632110  | TC1400002197.mm.1  | -0.4 | 0.001276 |
| TC0100003550.mm.1 | NM_198654          | Nsl1    | NSL1, MIND kinetochore complex component, h     | 191063012 | 191084558 | TC0100001836.mm.1  | -0.4 | 0.001276 |
| TC0100003553.mm.1 | NR_030455          | Mir684- | microRNA 684-2                                  | 11134097  | 11134182  | TC0400000082.mm.1  | -1.1 | 0.001276 |
| TC0100003554.mm.1 | NM_001122739       | Inpp1   | inositol polyphosphate phosphatase-like 1       | 101822632 | 101838226 | TC0700003844.mm.1  | 0.4  | 0.001279 |
| TC0100003562.mm.1 | NM_016852          | Wbp2    | WW domain binding protein 2                     | 116078573 | 116086995 | TC1100004102.mm.1  | 0.4  | 0.001289 |
| TC0100003566.mm.1 | NM_197982          | Ddx39   | DEAD (Asp-Glu-Ala-Asp) box polypeptide 39       | 83715177  | 83726892  | TC0800000932.mm.1  | -0.3 | 0.001291 |
| TC0100003577.mm.1 | NM_026533          | Rps13   | ribosomal protein S13                           | 116331507 | 116334190 | TC0700004155.mm.1  | -0.6 | 0.001293 |
| TC0100003579.mm.1 | OTTMUST00000025902 | RP23-28 | ---                                             | 14564771  | 145647115 | TC04000003967.mm.1 | -0.5 | 0.001299 |
| TC0100003590.mm.1 | NM_025982          | Tspan31 | tetraspanin 31                                  | 127067289 | 127070261 | TC1000003096.mm.1  | 1.0  | 0.001308 |
| TC0100003593.mm.1 | ENSMUST00000177820 | Gm9242  | predicted pseudogene 9242                       | 97490047  | 97491120  | TC1600001091.mm.1  | -1.1 | 0.001313 |
| TC0100003595.mm.1 | NM_012060          | Bcap31  | B cell receptor associated protein 31           | 73686178  | 73716175  | TC0X00002433.mm.1  | 0.8  | 0.001314 |
| TC0100003599.mm.1 | ENSMUST00000121764 | Gm15644 | predicted gene 15644                            | 67012485  | 67012871  | TC0600000778.mm.1  | -0.5 | 0.001326 |
| TC0100003610.mm.1 | NM_021462          | Mknk2   | MAP kinase-interacting serine/threonine kinase  | 80665327  | 80676293  | TC1000002509.mm.1  | 1.1  | 0.001329 |
| TC0100003611.mm.1 | OTTMUST00000112310 | RP23-58 | ---                                             | 43943902  | 43944483  | TC0500002318.mm.1  | -1.0 | 0.001332 |
| TC0100003615.mm.1 | NM_010329          | Pdpm    | podoplanin                                      | 143267422 | 143299564 | TC0400003917.mm.1  | 0.4  | 0.001333 |
| TC0100003620.mm.1 | ENSMUST00000053326 | Gm5612  | predicted gene 5612                             | 18427543  | 18428806  | TC0900000134.mm.1  | 0.5  | 0.001335 |
| TC0100003627.mm.1 | NM_023842          | Dsp     | desmoplakin                                     | 38151294  | 38198577  | TC1300000442.mm.1  | -1.3 | 0.001336 |
| TC0100003641.mm.1 | NM_133784          | Wwtr1   | WW domain containing transcription regulator 1  | 57455644  | 57575910  | TC0300002025.mm.1  | 0.7  | 0.001338 |
| TC0100003642.mm.1 | NM_024208          | Echdc3  | enoyl Coenzyme A hydratase domain containing    | 6188465   | 6213033   | TC0200002890.mm.1  | 0.2  | 0.00134  |
| TC0100003644.mm.1 | ENSMUST00000118614 | Gm12058 | predicted gene 12058                            | 22786811  | 22787247  | TC1100002353.mm.1  | -0.5 | 0.00134  |
| TC0100003646.mm.1 | ENSMUST00000173076 | Gm3617  | predicted gene 3617                             | 39314899  | 39315453  | TC0100000283.mm.1  | -1.3 | 0.00135  |
| TC0100003665.mm.1 | NM_011044          | Pck1    | phosphoenolpyruvate carboxykinase 1, cytosolic  | 173153048 | 173159273 | TC0200002683.mm.1  | 2.1  | 0.001351 |
| TC0100003679.mm.1 | ENSMUST00000078030 | Gm6104  | predicted gene 6104                             | 4879202   | 4880669   | TC0100001913.mm.1  | -0.5 | 0.001362 |
| TC0100003686.mm.1 | ENSMUST00000119552 | Gm13804 | predicted gene 13804                            | 98291403  | 98291574  | TC0200001500.mm.1  | -0.5 | 0.001365 |
| TC0100003696.mm.1 | NM_145942          | Hmgcs1  | 3-hydroxy-3-methylglutaryl-Coenzyme A synthas   | 119690446 | 119708086 | TC1300001353.mm.1  | 1.2  | 0.001374 |
| TC0100003697.mm.1 | NM_001276446       | Alad    | aminolevulinatase, delta-, dehydratase          | 62505984  | 62520063  | TC0400002791.mm.1  | 0.3  | 0.001376 |
| TC0100003698.mm.1 | ENSMUST00000119745 | Gm13864 | predicted gene 13864                            | 34786679  | 34787463  | TC0600000338.mm.1  | -1.0 | 0.001381 |
| TC0100003709.mm.1 | OTTMUST00000012973 | RP23-15 | ---                                             | 61416402  | 61416815  | TC1100002911.mm.1  | -0.4 | 0.001389 |
| TC0100003713.mm.1 | ENSMUST00000104797 | Gm23134 | predicted gene, 23134                           | 157562361 | 157562447 | TC0200005024.mm.1  | 0.9  | 0.00139  |
| TC0100003715.mm.1 | NM_019414          | Selenbp | selenium binding protein 2                      | 94693556  | 94704413  | TC0300000875.mm.1  | 1.0  | 0.00139  |
| TC0100003723.mm.1 | NM_001290122       | Rbm4    | RNA binding motif protein 4 (Rbm4), transcript  | 0         | 0         | TSUnmapped0000002  | -0.8 | 0.001393 |
| TC0100003736.mm.1 | NM_010656          | Sspn    | sarcospan                                       | 145931641 | 145965225 | TC0600001729.mm.1  | 0.3  | 0.001395 |
| TC0100003738.mm.1 | XM_884320          | Gm6115  | predicted gene 6115                             | 101038599 | 101039246 | TC1300002547.mm.1  | -1.2 | 0.001396 |
| TC0100003740.mm.1 | NM_027334          | Mettl7a | methyltransferase like 7A1                      | 100304817 | 100328662 | TC1500001040.mm.1  | 1.2  | 0.0014   |
| TC0100003742.mm.1 | NCBI_Gene:640931:p | Trav13d | T cell receptor alpha variable 13D-1            | 52851290  | 52851866  | TC1400000635.mm.1  | -0.4 | 0.001403 |
| TC0100003751.mm.1 | NM_153127          | Mmrn2   | multimerin 2                                    | 34375504  | 34404287  | TC1400000376.mm.1  | 0.7  | 0.001403 |
| TC0100003754.mm.1 | NM_009352          | Terf1   | telomeric repeat binding factor 1               | 15840564  | 15844052  | TC1000000092.mm.1  | -0.6 | 0.00141  |
| TC0100003773.mm.1 | ENSMUST00000084171 | Gm5518  | predicted gene 5518                             | 29160118  | 29160765  | TC1900000438.mm.1  | -1.2 | 0.001411 |
| TC0100003775.mm.1 | NM_007408          | Plin2   | perilipin 2                                     | 86648386  | 86670060  | TC0400002980.mm.1  | 1.0  | 0.001417 |
| TC0100003780.mm.1 | NM_029938          | H2afv   | H2A histone family, member V                    | 6427226   | 6444443   | TC1100002170.mm.1  | -0.7 | 0.001431 |
| TC0100003786.mm.1 | NM_026185          | Abhd15  | abhydrolase domain containing 15                | 77515117  | 77538607  | TC1100001127.mm.1  | 0.5  | 0.001431 |
| TC0100003804.mm.1 | NM_001081059       | Mcur1   | mitochondrial calcium uniporter regulator 1     | 43538406  | 43560191  | TC1300001886.mm.1  | 0.7  | 0.001434 |
| TC0100003805.mm.1 | XM_894495          | Gm6988  | predicted gene 6988                             | 110315983 | 110316367 | TC1200001206.mm.1  | -0.8 | 0.001437 |
| TC0100003817.mm.1 | NM_027667          | Arhgap1 | Rho GTPase activating protein 19                | 41766588  | 41802084  | TC1900001510.mm.1  | -0.6 | 0.001445 |
| TC0100003824.mm.1 | NM_029383          | Cldn22  | claudin 22                                      | 47824482  | 47825475  | TC0800000561.mm.1  | 0.3  | 0.001452 |

|                   |                    |         |                                                 |           |           |                   |      |          |
|-------------------|--------------------|---------|-------------------------------------------------|-----------|-----------|-------------------|------|----------|
| TC0100003825.mm.1 | ENSMUST00000178193 | Gm5540  | predicted pseudogene 5540                       | 65393301  | 65395231  | TC0300000525.mm.1 | 0.2  | 0.001454 |
| TC0100003838.mm.1 | NM_030707          | Fcrls   | Fc receptor-like S, scavenger receptor          | 87250758  | 87263738  | TC0300002284.mm.1 | 0.5  | 0.001455 |
| TC0100003855.mm.1 | NR_036572          | Rps15a- | ribosomal protein S15A, pseudogene 4            | 132219893 | 132220589 | TC0400003661.mm.1 | -0.3 | 0.001457 |
| TC0100003857.mm.1 | XM_003688934       | Gm21451 | predicted gene, 21451                           | 69390793  | 69695834  | TC1400000976.mm.1 | 0.4  | 0.001465 |
| TC0100003866.mm.1 | NM_007630          | Ccnb2   | cyclin B2                                       | 70407689  | 70421554  | TC0900002593.mm.1 | -1.3 | 0.00148  |
| TC0100003867.mm.1 | NM_011707          | Vtn     | vitronectin                                     | 78499091  | 78502325  | TC1100001162.mm.1 | 0.3  | 0.001486 |
| TC0100003872.mm.1 | NM_009636          | Aebp1   | AE binding protein 1                            | 5861866   | 5872225   | TC1100000081.mm.1 | 0.9  | 0.001489 |
| TC0100003875.mm.1 | ENSMUST0000060994  | Rpl31-p | ribosomal protein L31, pseudogene 13            | 100415565 | 100415942 | TC1300001137.mm.1 | -1.2 | 0.001494 |
| TC0100003877.mm.1 | NM_024222          | Stt3b   | STT3, subunit of the oligosaccharyltransferase  | 115242581 | 115310421 | TC0900003182.mm.1 | 0.7  | 0.001498 |
| TC0100003879.mm.1 | NM_008713          | Nos3    | nitric oxide synthase 3, endothelial cell       | 24364810  | 24384474  | TC0500000212.mm.1 | 0.4  | 0.001499 |
| TC0100003884.mm.1 | ENSMUST0000080234  | Rpl27a- | ribosomal protein L27A, pseudogene 2            | 108692194 | 108692643 | TC1400002677.mm.1 | -0.5 | 0.00151  |
| TC0100003885.mm.1 | NCBI_Gene:195296:p | Trav4d- | Trav4d-4 T cell receptor alpha variable 4D-4    | 52990889  | 52991390  | TC1400000650.mm.1 | -0.5 | 0.001513 |
| TC0100003886.mm.1 | NM_028803          | Gbe1    | glucan (1,4-alpha-), branching enzyme 1         | 70313949  | 703569720 | TC1600000810.mm.1 | 0.6  | 0.001514 |
| TC0100003888.mm.1 | ENSMUST00000169135 | Gm11847 | predicted gene 11847                            | 12232780  | 12238024  | TC0400000109.mm.1 | -0.4 | 0.001515 |
| TC0100003891.mm.1 | ENSMUST0000074072  | Gm17352 | predicted gene, 17352                           | 97760130  | 97760588  | TC1300002491.mm.1 | -0.8 | 0.001516 |
| TC0200000001.mm.1 | NM_030018          | Tmem50b | transmembrane protein 50B                       | 91574503  | 91597800  | TC1600002080.mm.1 | 0.8  | 0.001517 |
| TC0200000002.mm.1 | NM_013505          | Dsc2    | desmocollin 2                                   | 20030633  | 20059554  | TC1800001043.mm.1 | -0.5 | 0.001527 |
| TC0200000007.mm.1 | ENSMUST0000092620  | LOC1010 | 60S ribosomal protein L12-like // 60S ribosoma  | 29698746  | 29699379  | TC1000001939.mm.1 | -1.3 | 0.001528 |
| TC0200000009.mm.1 | NM_016962          | Spast   | spastin                                         | 74338987  | 74391113  | TC1700001156.mm.1 | -0.4 | 0.001547 |
| TC0200000012.mm.1 | ENSMUST00000159764 | Gm8783  | predicted pseudogene 8783                       | 40622460  | 40622981  | TC1900000574.mm.1 | 0.9  | 0.001553 |
| TC0200000013.mm.1 | ENSMUST00000120920 | Gm15801 | predicted gene 15801                            | 40560537  | 40561058  | TC1900001492.mm.1 | 0.9  | 0.001553 |
| TC0200000014.mm.1 | NM_023625          | Pldb2   | phospholipase B domain containing 2             | 120483282 | 120503625 | TC0500003168.mm.1 | 0.3  | 0.001557 |
| TC0200000032.mm.1 | NM_172555          | Papolg  | poly(A) polymerase gamma                        | 23862646  | 23895270  | TC1100002379.mm.1 | -0.5 | 0.001566 |
| TC0200000048.mm.1 | ENSMUST00000104933 | Gm12355 | predicted gene 12355                            | 98624351  | 98625661  | TC1100003684.mm.1 | -0.4 | 0.001567 |
| TC0200000049.mm.1 | NM_024207          | Der1f   | Der1-like domain family, member 1               | 57869502  | 57892448  | TC1500001560.mm.1 | 0.5  | 0.00157  |
| TC0200000051.mm.1 | NM_001015046       | Rap1gap | RAP1 GTPase activating protein 2                | 74383356  | 74610915  | TC1100003193.mm.1 | 0.3  | 0.001574 |
| TC0200000053.mm.1 | NM_173404          | Bmp3    | bone morphogenetic protein 3                    | 98854439  | 98880960  | TC0500000953.mm.1 | 0.8  | 0.001575 |
| TC0200000067.mm.1 | NM_027519          | Medag   | mesenteric estrogen dependent adipogenesis      | 149411749 | 149431723 | TC0500003722.mm.1 | 0.6  | 0.001582 |
| TC0200000069.mm.1 | NM_026095          | Snrpd3  | small nuclear ribonucleoprotein D3              | 75518042  | 75535463  | TC1000000716.mm.1 | -0.5 | 0.001583 |
| TC0200000081.mm.1 | ENSMUST00000116168 | Rpl12-p | ribosomal protein L12, pseudogene 1             | 36957930  | 36958427  | TC0100002198.mm.1 | -0.6 | 0.001587 |
| TC0200000082.mm.1 | NM_001037999       | Dbi     | diazepam binding inhibitor                      | 120113280 | 120121096 | TC0100002964.mm.1 | 0.8  | 0.001589 |
| TC0200000088.mm.1 | NM_013867          | Bcar3   | breast cancer anti-estrogen resistance 3        | 122419780 | 122530183 | TC0300001247.mm.1 | 0.8  | 0.00159  |
| TC0200000089.mm.1 | NM_030082          | Hist3h2 | histone cluster 3, H2ba                         | 58948911  | 58949533  | TC1100000712.mm.1 | -0.9 | 0.001594 |
| TC0200000090.mm.1 | ENSMUST00000121140 | Gm12109 | predicted gene 12109                            | 32185005  | 32185701  | TC1100000332.mm.1 | -0.6 | 0.001602 |
| TC0200000091.mm.1 | ENSMUST00000121087 | Gm7308  | predicted pseudogene 7308                       | 127282063 | 127282509 | TC0600003170.mm.1 | -0.5 | 0.001607 |
| TC0200000092.mm.1 | ENSMUST0000082150  | Hmgb1f  | high mobility group box 1-like                  | 131608293 | 131608871 | TC0600003270.mm.1 | -0.4 | 0.001609 |
| TC0200000094.mm.1 | NM_001042556       | Rpf2    | ribosome production factor 2 homolog (S. cerevi | 40223246  | 40247039  | TC1000002041.mm.1 | -0.4 | 0.001622 |
| TC0200000095.mm.1 | ENSMUST00000117145 | Gm13216 | predicted gene 13216                            | 5603571   | 5604161   | TC0200000053.mm.1 | -0.7 | 0.001626 |
| TC0200000096.mm.1 | NR_002888          | Smarca5 | SWI/SNF related, matrix associated, actin depen | 145464204 | 145467961 | TC0400001863.mm.1 | -0.3 | 0.001629 |
| TC0200000097.mm.1 | NM_031874          | Rab3d   | RAB3D, member RAS oncogene family               | 21907491  | 21918192  | TC0900001887.mm.1 | 0.4  | 0.001629 |
| TC0200000098.mm.1 | NM_001081415       | Samd1   | sterile alpha motif domain containing 1         | 83997672  | 84000386  | TC0800000941.mm.1 | -0.3 | 0.00163  |
| TC0200000099.mm.1 | NM_001080134       | Tmpo    | thymopoietin                                    | 91147571  | 91171619  | TC1000002671.mm.1 | -0.8 | 0.001631 |
| TC0200000100.mm.1 | NM_026517          | Rpl22l1 | ribosomal protein L22 like 1                    | 28805436  | 28807419  | TC0300000182.mm.1 | -0.4 | 0.001632 |
| TC0200000101.mm.1 | ENSMUST00000119766 | Gm12118 | predicted gene 12118                            | 33438449  | 33438980  | TC1100000356.mm.1 | -0.8 | 0.00164  |
| TC0200000102.mm.1 | ENSMUST00000117928 | Rpl30-p | ribosomal protein L30, pseudogene 3             | 90747616  | 90747963  | TC0200004099.mm.1 | -0.6 | 0.001641 |
| TC0200000104.mm.1 | NR_035474          | Mir669m | microRNA 669m-1                                 | 78929670  | 79515904  | TC0500002656.mm.1 | 0.6  | 0.001642 |
| TC0200000105.mm.1 | NM_021053          | Slc46a2 | solute carrier family 46, member 2              | 59905126  | 59915056  | TC0400002765.mm.1 | -0.8 | 0.001646 |
| TC0200000106.mm.1 | NCBI_Gene:620191:p | Igkv6-2 | immunoglobulin kappa chain variable 6-29        | 70138462  | 70139082  | TC0600002449.mm.1 | -1.2 | 0.001648 |
| TC0200000107.mm.1 | NM_001081224       | Prr16   | proline rich 16                                 | 51117898  | 51420044  | TC1800000516.mm.1 | 0.6  | 0.001649 |
| TC0200000108.mm.1 | NM_009612          | Axcr1f  | activin A receptor, type II-like 1              | 101128522 | 101145336 | TC1500001061.mm.1 | 0.4  | 0.001664 |
| TC0200000109.mm.1 | NM_029541          | Acxsf1  | adipocyte-related X-chromosome expressed seq    | 136033367 | 136033946 | TC0X00001317.mm.1 | 1.2  | 0.001668 |
| TC0200000110.mm.1 | ENSMUST00000162120 | Gm7418  | predicted pseudogene 7418                       | 94835717  | 94836517  | TC0800001122.mm.1 | -0.9 | 0.001671 |
| TC0200000111.mm.1 | NCBI_Gene:10004321 | Trav14d | Trav14d-2 T cell receptor alpha variable 14D-2  | 52948583  | 52949267  | TC1400002802.mm.1 | -0.6 | 0.00169  |
| TC0200000112.mm.1 | NCBI_Gene:193574:p | Trav14n | Trav14n-2 T cell receptor alpha variable 14N-2  | 53259593  | 53260277  | TC1400002820.mm.1 | -0.6 | 0.00169  |
| TC0200000113.mm.1 | NM_010571          | Irs3    | insulin receptor substrate 3                    | 137643031 | 137645714 | TC0500003451.mm.1 | 0.5  | 0.001691 |
| TC0200000114.mm.1 | NM_008229          | Hdac2   | histone deacetylase 2                           | 36974544  | 37001889  | TC1000000312.mm.1 | -0.7 | 0.001708 |
| TC0200000115.mm.1 | NM_029555          | Gstk1   | glutathione S-transferase kappa 1               | 42245935  | 42250444  | TC0600000454.mm.1 | 0.9  | 0.001711 |
| TC0200000116.mm.1 | ENSMUST00000184536 | FAS-AS1 | FAS antisense RNA 1 conserved region            | 34294137  | 34294295  | TC1900000498.mm.1 | -0.2 | 0.001716 |
| TC0200000117.mm.1 | NM_001003912       | Arhgef1 | Rho guanine nucleotide exchange factor (GEF) 1: | 87617559  | 87738034  | TC0300000700.mm.1 | 0.2  | 0.00172  |
| TC0200000118.mm.1 | ENSMUST00000178763 | Gm5903  | predicted gene 5903                             | 130343525 | 130354373 | TC0700004382.mm.1 | -0.5 | 0.001721 |
| TC0200000119.mm.1 | ENSMUST00000091130 | Hnrrpa3 | heterogeneous nuclear ribonucleoprotein A3      | 54481429  | 54482923  | TC0300000409.mm.1 | -1.1 | 0.001727 |
| TC0200000120.mm.1 | ENSMUST00000079844 | Gm13642 | predicted gene 13642                            | 71412531  | 71412917  | TC0200003724.mm.1 | -0.7 | 0.001737 |
| TC0200000121.mm.1 | ENSMUST00000122151 | Gm13237 | predicted gene 13237                            | 146564453 | 146565087 | TC0400003976.mm.1 | -1.8 | 0.001739 |
| TC0200000122.mm.1 | ENSMUST00000119147 | Rpl9-ps | ribosomal protein L9, pseudogene 3              | 53501184  | 53501762  | TC1100000607.mm.1 | -0.3 | 0.001746 |
| TC0200000123.mm.1 | NM_021788          | Sap30   | sin3 associated polypeptide                     | 57482702  | 57487860  | TC0800002252.mm.1 | -0.4 | 0.001754 |
| TC0200000124.mm.1 | NM_023844          | Jam2    | junction adhesion molecule 2                    | 84774123  | 84826380  | TC1600000938.mm.1 | 0.7  | 0.001761 |
| TC0200000125.mm.1 | ENSMUST00000117464 | Gm14537 | predicted gene 14537                            | 20391709  | 20392501  | TC0X00000206.mm.1 | -0.6 | 0.001763 |
| TC0200000126.mm.1 | NM_001252531       | Slco2b1 | solute carrier organic anion transporter family | 99657804  | 99711340  | TC0700003804.mm.1 | 0.5  | 0.001764 |
| TC0200000127.mm.1 | XM_003688790       | Gm20764 | predicted gene, 20764                           | 34311003  | 34311185  | TC0400002382.mm.1 | -0.3 | 0.001768 |
| TC0200000128.mm.1 | ENSMUST00000121562 | Gm11855 | predicted gene 11855                            | 15819074  | 15821370  | TC0400002242.mm.1 | -0.3 | 0.001776 |
| TC0200000129.mm.1 | ENSMUST00000122289 | Gm14970 | predicted gene 14970                            | 127446562 | 127446916 | TC0X00002954.mm.1 | -0.9 | 0.001778 |
| TC0200000130.mm.1 | ENSMUST00000091375 | Rps24-p | ribosomal protein S24, pseudogene 2             | 3791897   | 3792295   | TC0300000007.mm.1 | -0.8 | 0.001783 |
| TC0200000131.mm.1 | NM_025900          | Dek     | DEK oncogene (DNA binding)                      | 47084767  | 47106221  | TC1300001928.mm.1 | -0.7 | 0.001792 |
| TC0200000132.mm.1 | ENSMUST00000121942 | Gm6161  | predicted gene 6161                             | 9574548   | 9575649   | TC1000000040.mm.1 | -1.1 | 0.001798 |
| TC0200000133.mm.1 | ENSMUST00000172910 | Gm9581  | predicted gene 9581                             | 59558013  | 59600886  | TC1600001806.mm.1 | 0.6  | 0.001805 |
| TC0200000134.mm.1 | ENSMUST00000091762 | Gm5446  | predicted gene 5446                             | 19995021  | 19995803  | TC1300001527.mm.1 | -0.7 | 0.001806 |
| TC0200000135.mm.1 | NM_027406          | Aldh1l1 | aldehyde dehydrogenase 1 family, member L1      | 90486427  | 90600203  | TC0600001076.mm.1 | 0.7  | 0.001811 |
| TC0200000136.mm.1 | NM_001142731       | Kctd1   | potassium channel tetramerisation domain cont   | 14968685  | 15151446  | TC1800001012.mm.1 | -0.3 | 0.001831 |

|                   |                    |          |                                                 |           |           |                    |      |          |
|-------------------|--------------------|----------|-------------------------------------------------|-----------|-----------|--------------------|------|----------|
| TC0200000137.mm.1 | NM_011784          | Aplnr    | apelin receptor                                 | 85136225  | 85139923  | TC0200001234.mm.1  | 0.6  | 0.001837 |
| TC0200000138.mm.1 | ENSMUST00000122008 | Gm13363  | predicted gene 13363                            | 19992921  | 19993442  | TC0200000322.mm.1  | -0.9 | 0.001842 |
| TC0200000139.mm.1 | ENSMUST00000128343 | Gm3160   | predicted pseudogene 3160                       | 14136910  | 14136916  | TC0800000142.mm.1  | -1.0 | 0.001843 |
| TC0200000140.mm.1 | NCBI_Gene:620126:p | Igkv8-3  | Igkv8-34 immunoglobulin kappa variable 8-34     | 70044112  | 70044678  | TC0600002448.mm.1  | -0.5 | 0.001845 |
| TC0200000141.mm.1 | ENSMUST00000180422 | Gm9625   | predicted gene 9625                             | 67810246  | 67811200  | TC1300000830.mm.1  | -1.0 | 0.001848 |
| TC0200000142.mm.1 | ENSMUST00000104916 | Gm9493   | predicted gene 9493                             | 23619742  | 23620320  | TC1900000378.mm.1  | -1.2 | 0.001856 |
| TC0200000143.mm.1 | NM_181748          | Ffar4    | free fatty acid receptor 4                      | 38097079  | 38114263  | TC1900000545.mm.1  | 0.5  | 0.001863 |
| TC0200000144.mm.1 | NM_001083903       | Sbsn     | suprabasin                                      | 30751471  | 30756134  | TC0700004620.mm.1  | 0.3  | 0.00187  |
| TC0200000145.mm.1 | NM_010554          | Il1a     | interleukin 1 alpha                             | 129299609 | 129309972 | TC0200004599.mm.1  | -0.3 | 0.001877 |
| TC0200000146.mm.1 | ENSMUST00000120384 | Rpl7a-p  | ribosomal protein L7A, pseudogene 12            | 152908778 | 152910296 | TC0X00003200.mm.1  | -0.3 | 0.001881 |
| TC0200000147.mm.1 | ENSMUST00000181857 | Rpl31-p  | ribosomal protein L31, pseudogene 15            | 37734730  | 37735104  | TC03000000292.mm.1 | -0.9 | 0.001881 |
| TC0200000148.mm.1 | NM_009794          | Capn2    | calpain 2                                       | 182467256 | 182517495 | TC0100003715.mm.1  | 0.7  | 0.001882 |
| TC0200000149.mm.1 | NM_009257          | Serpinb  | serine (or cysteine) peptidase inhibitor, clade | 106861173 | 106883348 | TC0100001024.mm.1  | -0.5 | 0.001884 |
| TC0200000150.mm.1 | ENSMUST00000122190 | Gm4879   | predicted pseudogene 4879                       | 13178903  | 13180174  | TC0700000158.mm.1  | -0.7 | 0.001893 |
| TC0200000151.mm.1 | ENSMUST00000177677 | Gm8888   | predicted gene 8888                             | 96766761  | 96767141  | TC1500002145.mm.1  | -0.2 | 0.001895 |
| TC0200000152.mm.1 | NCBI_Gene:108024:p | Igkv6-2  | immunoglobulin kappa variable 6-20              | 70335841  | 70336479  | TC0600003592.mm.1  | -1.5 | 0.001896 |
| TC0200000153.mm.1 | NM_028306          | Sialp12b | heat shock protein 12B                          | 131127280 | 131146321 | TC0200002005.mm.1  | 0.4  | 0.001896 |
| TC0200000154.mm.1 | NM_025321          | Sdhc     | succinate dehydrogenase complex, subunit C, int | 171127165 | 171150603 | TC0100003528.mm.1  | 0.5  | 0.001898 |
| TC0200000155.mm.1 | ENSMUST00000058706 | Gm7816   | predicted pseudogene 7816                       | 39798214  | 39799407  | TC0500000449.mm.1  | -0.5 | 0.0019   |
| TC0200000156.mm.1 | XM_001002269       | Gm8290   | predicted gene 8290                             | 82008391  | 82008858  | TC1000000913.mm.1  | -0.8 | 0.001912 |
| TC0200000157.mm.1 | ENSMUST00000118441 | Gm13160  | predicted gene 13160                            | 147086358 | 147086984 | TC0400003982.mm.1  | -1.6 | 0.001917 |
| TC0200000158.mm.1 | NM_146007          | Col6a2   | collagen, type VI, alpha 2                      | 76595756  | 76623630  | TC1000002405.mm.1  | 0.7  | 0.001934 |
| TC0200000159.mm.1 | NM_001081013       | Rlf      | rearranged L-myc fusion sequence                | 121145373 | 121215084 | TC0400003456.mm.1  | -0.3 | 0.001936 |
| TC0200000160.mm.1 | ENSMUST00000122125 | Rplp0-p  | ribosomal protein, large, P0, pseudogene 1      | 93278141  | 93279073  | TC0300000845.mm.1  | -0.9 | 0.001944 |
| TC0200000161.mm.1 | ENSMUST00000177906 | Gm7879   | predicted pseudogene 7879                       | 43913170  | 43913898  | TC0500000470.mm.1  | -0.8 | 0.001945 |
| TC0200000162.mm.1 | XM_619909          | Gm5848   | predicted pseudogene 5848                       | 68308825  | 68309181  | TC0300002118.mm.1  | -0.6 | 0.001947 |
| TC0200000163.mm.1 | NM_008340          | Igfals   | insulin-like growth factor binding protein, aci | 24878770  | 24882008  | TC1000003355.mm.1  | 1.2  | 0.00195  |
| TC0200000164.mm.1 | NM_001290123       | Rbm4     | RNA binding motif protein 4 (Rbm4), transcript  | 0         | 0         | TSUnmapped0000002  | -0.8 | 0.001967 |
| TC0200000165.mm.1 | NM_172442          | Dtx4     | deltex 4 homolog (Drosophila)                   | 12466336  | 12502145  | TC1900001163.mm.1  | 0.6  | 0.001977 |
| TC0200000166.mm.1 | NM_145459          | Zfp503   | zinc finger protein 503                         | 21983962  | 21989601  | TC1400001561.mm.1  | 0.2  | 0.001978 |
| TC0200000167.mm.1 | NM_001162938       | Pycd3    | pyrin domain containing 3                       | 173673675 | 173698392 | TC0100001634.mm.1  | -0.4 | 0.001982 |
| TC0200000168.mm.1 | NM_001170786       | Mthfd1l  | methylenetetrahydrofolate dehydrogenase (NAF    | 3973075   | 4167081   | TC1000000015.mm.1  | -0.4 | 0.002002 |
| TC0200000169.mm.1 | NCBI_Gene:547328:p | Trav13n  | T cell receptor alpha variable 13N-3            | 53337122  | 53337639  | TC1400000686.mm.1  | -0.4 | 0.002003 |
| TC0200000170.mm.1 | NM_173864          | Gm5077   | predicted gene 5077                             | 124624625 | 124636085 | TC0600003109.mm.1  | 1.0  | 0.002008 |
| TC0200000171.mm.1 | ENSMUST00000118573 | Gm12387  | predicted gene 12387                            | 39895208  | 39896162  | TC0400002431.mm.1  | -0.5 | 0.00201  |
| TC0200000172.mm.1 | ENSMUST00000179113 | Gm14231  | predicted gene 14231                            | 156789810 | 156790403 | TC0200004998.mm.1  | -0.6 | 0.002031 |
| TC0200000173.mm.1 | NM_009378          | Thbd     | thrombomodulin                                  | 148404466 | 148408188 | TC0200004808.mm.1  | 0.8  | 0.002033 |
| TC0200000174.mm.1 | NM_001161623       | Cdc45    | cell division cycle 45                          | 18780447  | 18811987  | TC1600001320.mm.1  | -0.5 | 0.002037 |
| TC0200000175.mm.1 | ENSMUST00000180067 | Gm1815   | predicted gene 1815                             | 41657593  | 41658669  | TC0800002123.mm.1  | -0.6 | 0.002049 |
| TC0200000176.mm.1 | NM_172904          | Fsd2     | fibronectin type III and SPRY domain containing | 81533308  | 81566981  | TC0700003613.mm.1  | 0.3  | 0.002055 |
| TC0200000177.mm.1 | NM_178711          | Plscr4   | phospholipid scramblase 4                       | 92457378  | 92493510  | TC0900000173.mm.1  | 0.4  | 0.002065 |
| TC0200000178.mm.1 | NM_008566          | Mcm5     | minichromosome maintenance deficient 5, cell c  | 75109528  | 75128439  | TC0800000846.mm.1  | -1.0 | 0.002074 |
| TC0200000179.mm.1 | NM_146208          | Neil3    | nei like 3 (E. coli)                            | 53586867  | 53639065  | TC0800002235.mm.1  | -0.3 | 0.002075 |
| TC0200000182.mm.1 | ENSMUST00000120433 | Gm11793  | predicted gene 11793                            | 121106147 | 121107127 | TC1100004245.mm.1  | -0.7 | 0.002079 |
| TC0200000183.mm.1 | NM_030139          | Zfp449   | zinc finger protein 449                         | 56346400  | 56365674  | TC0X00000515.mm.1  | 0.3  | 0.002081 |
| TC0200000184.mm.1 | NM_177811          | Zfp459   | zinc finger protein 459                         | 67405712  | 67421418  | TC1300002247.mm.1  | -0.2 | 0.002089 |
| TC0200000185.mm.1 | NM_147218          | Abca6    | ATP-binding cassette, sub-family A (ABC1), mem  | 110176820 | 110251776 | TC1100004002.mm.1  | 0.5  | 0.00209  |
| TC0200000186.mm.1 | ENSMUST00000090170 | Rpl7a-p  | ribosomal protein L7A, pseudogene 3             | 36308144  | 36308956  | TC1500001372.mm.1  | -0.8 | 0.00209  |
| TC0200000187.mm.1 | OTTMUST00000060666 | RP23-18  | ---                                             | 122696001 | 122696882 | TC0600001390.mm.1  | -0.5 | 0.00209  |
| TC0200000188.mm.1 | NM_177390          | Myo1d    | myosin ID                                       | 80482126  | 80780025  | TC1100003345.mm.1  | 0.6  | 0.002096 |
| TC0200000189.mm.1 | ENSMUST00000117863 | Gm13311  | predicted gene 13311                            | 14692872  | 14693251  | TC0200003000.mm.1  | -0.5 | 0.002108 |
| TC0200000190.mm.1 | ENSMUST00000119220 | Gm11631  | predicted gene 11631                            | 98063888  | 98064043  | TC1100001556.mm.1  | -1.2 | 0.002113 |
| TC0200000191.mm.1 | NM_010680          | Lama3    | laminin, alpha 3                                | 12334024  | 12583013  | TC1800000103.mm.1  | -0.2 | 0.002116 |
| TC0200000192.mm.1 | ENSMUST00000178171 | Gm8494   | predicted gene 8494                             | 146575194 | 146576123 | TC0500001792.mm.1  | -0.6 | 0.002117 |
| TC0200000193.mm.1 | ENSMUST00000118777 | Gm11671  | predicted gene 11671                            | 108716483 | 108716906 | TC1100001817.mm.1  | -0.6 | 0.002125 |
| TC0200000194.mm.1 | NM_013642          | Dusp1    | dual specificity phosphatase 1                  | 26505590  | 26508519  | TC1700001699.mm.1  | 0.9  | 0.002127 |
| TC0200000195.mm.1 | ENSMUST00000157141 | Gm23982  | predicted gene, 23982                           | 42832779  | 42832884  | TC0600000469.mm.1  | 0.3  | 0.002128 |
| TC0200000196.mm.1 | NM_011806          | Dmtf1    | cyclin D binding myb-like transcription factor  | 9118801   | 9161776   | TC0500001938.mm.1  | -0.3 | 0.002129 |
| TC0200000197.mm.1 | ENSMUST00000179566 | Gm6132   | predicted pseudogene 6132                       | 70007204  | 70007614  | TC1300002283.mm.1  | -0.6 | 0.002133 |
| TC0200000198.mm.1 | NM_010097          | Sparc1   | SPARC-like 1                                    | 104079108 | 104114088 | TC0500002887.mm.1  | 1.4  | 0.002133 |
| TC0200000199.mm.1 | NM_172133          | Adap2    | ArfGAP with dual PH domains 2                   | 80154105  | 80178958  | TC1100001196.mm.1  | 0.8  | 0.002153 |
| TC0200000200.mm.1 | NM_010110          | Efnb1    | ephrin B1                                       | 99136130  | 99148991  | TC0X00000934.mm.1  | 0.4  | 0.002155 |
| TC0200000201.mm.1 | ENSMUST00000098546 | Fam83b   | family with sequence similarity 83, member B    | 76490054  | 76567116  | TC0900002688.mm.1  | -0.3 | 0.002157 |
| TC0200000202.mm.1 | NM_023127          | Polr2k   | polymerase (RNA) II (DNA directed) polypeptide  | 36174010  | 36177012  | TC1500000262.mm.1  | -0.3 | 0.00216  |
| TC0200000203.mm.1 | NM_023203          | Dctpp1   | dCTP pyrophosphatase 1                          | 127256959 | 127260709 | TC0700004320.mm.1  | -0.3 | 0.002192 |
| TC0200000204.mm.1 | NM_007475          | Rplp0    | ribosomal protein, large, P0                    | 115559467 | 115563729 | TC0500001266.mm.1  | -0.4 | 0.00221  |
| TC0200000205.mm.1 | NM_010231          | Fmo1     | flavin containing monooxygenase 1               | 162829561 | 162866548 | TC0100003401.mm.1  | 1.2  | 0.002211 |
| TC0200000211.mm.1 | ENSMUST00000117169 | Rps12-p  | ribosomal protein S12, pseudogene 7             | 151165725 | 151166109 | TC0X00001511.mm.1  | -0.5 | 0.002211 |
| TC0200000218.mm.1 | NM_019571          | Tspan5   | tetraspanin 5                                   | 138742195 | 138904433 | TC0300001423.mm.1  | 0.3  | 0.002212 |
| TC0200000219.mm.1 | ENSMUST00000122370 | Smt3h2-  | SMT3 suppressor of mif two 3 homolog 2, pseud   | 127397978 | 127398265 | TC0700001844.mm.1  | -0.8 | 0.002213 |
| TC0200000240.mm.1 | ENSMUST00000117548 | Hmgb1-p  | high mobility group box 1, pseudogene 2         | 146175942 | 146176577 | TC0X00001441.mm.1  | -1.2 | 0.002216 |
| TC0200000246.mm.1 | NM_011509          | Gm3258   | predicted gene 3258                             | 31413726  | 31414435  | TC1000001957.mm.1  | -0.7 | 0.002219 |
| TC0200000267.mm.1 | NM_133670          | Sult1a1  | sulfotransferase family 1A, phenol-preferring,  | 126672865 | 126676432 | TC0700004291.mm.1  | 0.8  | 0.00222  |
| TC0200000277.mm.1 | ENSMUST00000161973 | Gm6397   | predicted gene 6397                             | 143683230 | 143684298 | TC0100001315.mm.1  | -1.0 | 0.002221 |
| TC0200000297.mm.1 | ENSMUST00000071732 | Gm6793   | predicted gene 6793                             | 112013433 | 112015036 | TC0800002962.mm.1  | -0.8 | 0.002224 |
| TC0200000298.mm.1 | ENSMUST00000121100 | Gm5135   | predicted pseudogene 5135                       | 41923255  | 41923827  | TC0X00002113.mm.1  | -0.3 | 0.002226 |
| TC0200000300.mm.1 | ENSMUST00000177572 | Gm9046   | predicted gene 9046                             | 118342011 | 118343255 | TC1000002988.mm.1  | -0.4 | 0.002227 |
| TC0200000316.mm.1 | NM_026730          | Gpihbp1  | GPI-anchored HDL-binding protein 1              | 75596658  | 75598213  | TC1500000557.mm.1  | 0.6  | 0.002227 |

|                   |                     |         |                                                 |           |           |                    |      |          |
|-------------------|---------------------|---------|-------------------------------------------------|-----------|-----------|--------------------|------|----------|
| TC0200000318.mm.1 | ENSMUST00000076703  | LOC1010 | 60S ribosomal protein L12-like // 60S ribosoma  | 130068412 | 130068978 | TC0300001317.mm.1  | -1.4 | 0.002235 |
| TC0200000321.mm.1 | ENSMUST00000121816  | Gm13232 | predicted gene 13232                            | 145729581 | 145730212 | TC0400003968.mm.1  | -1.8 | 0.002239 |
| TC0200000322.mm.1 | NM_001252056        | Ly6c1   | lymphocyte antigen 6 complex, locus C1          | 75044018  | 750448837 | TC1500001729.mm.1  | 0.5  | 0.00224  |
| TC0200000327.mm.1 | ENSMUST00000099968  | Gm13690 | predicted gene 13690                            | 80629281  | 80629568  | TC0200003842.mm.1  | -0.9 | 0.00224  |
| TC0200000341.mm.1 | NM_027030           | Dcps    | decapping enzyme, scavenger                     | 35124408  | 35176061  | TC0900002007.mm.1  | -0.3 | 0.002243 |
| TC0200000345.mm.1 | ENSMUST00000118081  | Gm6335  | predicted gene 6335                             | 112162554 | 112163747 | TC0X00001121.mm.1  | -0.3 | 0.002247 |
| TC0200000349.mm.1 | NM_001167921        | Gtf2e2  | general transcription factor II E, polypeptide  | 33731914  | 33777173  | TC0800000396.mm.1  | -0.3 | 0.002261 |
| TC0200000355.mm.1 | NM_007577           | C5ar1   | complement component 5a receptor 1              | 16246743  | 16259540  | TC0700002422.mm.1  | 0.4  | 0.002266 |
| TC0200000364.mm.1 | NM_001204910        | Al60787 | expressed sequence Al607873                     | 173723427 | 173741809 | TC0100003593.mm.1  | 0.7  | 0.002268 |
| TC0200000371.mm.1 | NM_007481           | Arf6    | ADP-ribosylation factor 6                       | 69372150  | 69375980  | TC1200000569.mm.1  | -0.4 | 0.00227  |
| TC0200000375.mm.1 | ENSMUST00000054664  | Gm6430  | predicted gene 6430                             | 97024681  | 97025928  | TC0100000967.mm.1  | -0.9 | 0.002271 |
| TC0200000390.mm.1 | ENSMUST00000119156  | Rpl17-p | ribosomal protein L17, pseudogene 1             | 61075674  | 61076225  | TC0100000491.mm.1  | -1.0 | 0.002275 |
| TC0200000394.mm.1 | ENSMUST00000118665  | Gm15773 | predicted gene 15773                            | 12603196  | 12604643  | TC0700000142.mm.1  | -0.6 | 0.00228  |
| TC0200000398.mm.1 | NM_001290124        | Rbm4    | RNA binding motif protein 4 (Rbm4), transcript  | 0         | 0         | TSUnmapped0000002  | -0.5 | 0.002281 |
| TC0200000400.mm.1 | NM_030725           | Syt13   | synaptotagmin XIII                              | 92915098  | 92956058  | TC0200001445.mm.1  | -0.5 | 0.002291 |
| TC0200000404.mm.1 | NM_009949           | Cpt2    | carnitine palmitoyltransferase 2                | 107903981 | 107923610 | TC0400003230.mm.1  | 0.8  | 0.002303 |
| TC0200000406.mm.1 | NM_001159718        | 2-Sep   | septin 2                                        | 93478964  | 93510260  | TC0100000936.mm.1  | 0.4  | 0.002305 |
| TC0200000409.mm.1 | NM_025311           | Tmem254 | transmembrane protein 254a                      | 25923298  | 25927672  | TC1400001605.mm.1  | 0.6  | 0.002311 |
| TC0200000410.mm.1 | NM_198014           | Slain1  | SLAIN motif family, member 1                    | 103650228 | 103704907 | TC1400001189.mm.1  | -0.7 | 0.002316 |
| TC0200000420.mm.1 | ENSMUST00000121857  | Gm15793 | predicted gene 15793                            | 66849108  | 66849602  | TC0100002496.mm.1  | -1.2 | 0.002319 |
| TC0200000432.mm.1 | ENSMUST00000071866  | Rpl13a- | ribosomal protein 13A, pseudogene 1             | 50030124  | 50030735  | TC1900001648.mm.1  | -0.6 | 0.002322 |
| TC0200000433.mm.1 | NM_008185           | Gstt1   | glutathione S-transferase, theta 1              | 75783813  | 75798584  | TC1000002383.mm.1  | 0.6  | 0.002322 |
| TC0200000458.mm.1 | ENSMUST00000161714  | Gm16134 | predicted gene 16134                            | 63446930  | 63447265  | TC1300002187.mm.1  | -0.3 | 0.002333 |
| TC0200000470.mm.1 | NM_029068           | Snx16   | sorting nexin 16                                | 10417817  | 10440130  | TC0300001647.mm.1  | -0.3 | 0.002342 |
| TC0200000478.mm.1 | NM_175149           | 2310022 | RIKEN cDNA 2310022B05 gene                      | 124635756 | 124663369 | TC08000003172.mm.1 | 0.3  | 0.002346 |
| TC0200000480.mm.1 | NM_026672           | Gstm7   | glutathione S-transferase, mu 7                 | 107926334 | 107931817 | TC0300002722.mm.1  | 0.4  | 0.002358 |
| TC0200000482.mm.1 | NM_007556           | Bmp6    | bone morphogenetic protein 6                    | 38345716  | 38499728  | TC1300000445.mm.1  | 0.6  | 0.002358 |
| TC0200000483.mm.1 | uc029usn.1          | Gm5859  | SubName: Full=Putative uncharacterized protein  | 42244548  | 42245272  | TC0400000402.mm.1  | 0.4  | 0.002361 |
| TC0200000485.mm.1 | XM_003688909        | Gm21188 | predicted gene, 21188                           | 120034605 | 120052194 | TC1300002756.mm.1  | 0.5  | 0.002366 |
| TC0200000488.mm.1 | ENSMUST00000181557  | Rpl31-p | ribosomal protein L31. pseudogene 25            | 81791555  | 81791933  | TC1700002614.mm.1  | -0.3 | 0.002368 |
| TC0200000489.mm.1 | BC158083            | Gm5580  | predicted pseudogene 5580                       | 116551141 | 116552502 | TC0600001305.mm.1  | -0.3 | 0.002377 |
| TC0200000493.mm.1 | ENSMUST00000088183  | Gm5940  | predicted gene 5940                             | 80456737  | 80458551  | TC0X00000796.mm.1  | -0.9 | 0.002378 |
| TC0200000505.mm.1 | NM_011121           | Plk1    | polo-like kinase 1                              | 122159437 | 122169875 | TC0700004624.mm.1  | -1.1 | 0.002384 |
| TC0200000514.mm.1 | NM_033521           | Laptm4b | lysosomal-associated protein transmembrane 4E   | 34238026  | 34284307  | TC1500000235.mm.1  | 0.8  | 0.002391 |
| TC0200000526.mm.1 | ENSMUST00000146593  | Gm15843 | predicted gene 15843                            | 72459499  | 72460027  | TC0100000605.mm.1  | -0.7 | 0.002394 |
| TC0200000528.mm.1 | ENSMUST00000139696  | Gm8062  | predicted pseudogene 8062                       | 73829932  | 73830375  | TC1300000889.mm.1  | -0.9 | 0.002397 |
| TC0200000540.mm.1 | ENSMUST00000057752  | Gm6776  | predicted pseudogene 6776                       | 43280798  | 43281697  | TC1900000625.mm.1  | -0.5 | 0.002398 |
| TC0200000543.mm.1 | NM_011182           | Cyth3   | cytohesin 3                                     | 143622447 | 143710250 | TC0500001737.mm.1  | 0.4  | 0.002402 |
| TC0200000545.mm.1 | XM_003085343        | Gm15466 | predicted gene 15466                            | 8882235   | 8882695   | TC0300001622.mm.1  | -0.9 | 0.00241  |
| TC0200000548.mm.1 | ENSMUST00000118359  | Gm13623 | predicted gene 13623                            | 69766182  | 69766806  | TC0200001010.mm.1  | -0.7 | 0.002414 |
| TC0200000566.mm.1 | NM_013866           | Zfp385a | zinc finger protein 385A                        | 103313895 | 103340086 | TC1300002317.mm.1  | 0.3  | 0.002423 |
| TC0200000568.mm.1 | NM_178213           | Hist2h2 | histone cluster 2, H2ab                         | 96219865  | 96220308  | TC0300000929.mm.1  | -1.2 | 0.002425 |
| TC0200000569.mm.1 | ENSMUST00000121722  | Gm12366 | predicted gene 12366                            | 35202058  | 35202975  | TC0400002404.mm.1  | -0.7 | 0.002431 |
| TC0200000570.mm.1 | NM_008485           | Lamc2   | laminin, gamma 2                                | 153122756 | 153186447 | TC0100003272.mm.1  | -0.3 | 0.00244  |
| TC0200000573.mm.1 | NM_026560           | Cdca8   | cell division cycle associated 8                | 124918464 | 124939311 | TC0400003516.mm.1  | -0.4 | 0.002452 |
| TC0200000575.mm.1 | NM_178200           | Hist1h2 | histone cluster 1, H2bm                         | 21722044  | 21722567  | TC1300000175.mm.1  | -0.8 | 0.002461 |
| TC0200000578.mm.1 | NM_027246           | Snrpf   | small nuclear ribonucleoprotein polypeptide F   | 93583029  | 93589706  | TC1000002696.mm.1  | -0.4 | 0.002461 |
| TC0200000580.mm.1 | NM_146067           | Cpped1  | calcineurin-like phosphoesterase domain contain | 11803708  | 11909445  | TC1600001218.mm.1  | 0.4  | 0.002466 |
| TC0200000581.mm.1 | NM_010171           | F3      | coagulation factor III                          | 121723537 | 121735052 | TC0300001236.mm.1  | 0.4  | 0.002479 |
| TC0200000589.mm.1 | ENSMUST00000120596  | Rpsa-ps | ribosomal protein SA, pseudogene 12             | 149142497 | 149143388 | TC0400004033.mm.1  | -0.9 | 0.002486 |
| TC0200000590.mm.1 | ENSMUST00000118985  | Gm14541 | predicted gene 14541                            | 36839137  | 36839293  | TC0X00002051.mm.1  | -1.0 | 0.002493 |
| TC0200000593.mm.1 | ENSMUST00000119350  | Hmgb1-p | high mobility group box 1, pseudogene 1         | 41141763  | 41142396  | TC1100000410.mm.1  | -1.2 | 0.002504 |
| TC0200000603.mm.1 | ENSMUST00000085507  | Gm6254  | predicted gene 6254                             | 122117938 | 122119009 | TC1400001328.mm.1  | -1.0 | 0.002515 |
| TC0200000604.mm.1 | NM_007472           | Aqp1    | aquaporin 1                                     | 55336299  | 55348555  | TC0600000664.mm.1  | 1.4  | 0.002518 |
| TC0200000616.mm.1 | XM_001478560        | Gm6750  | predicted gene 6750                             | 116507612 | 116507884 | TC1200002500.mm.1  | -1.1 | 0.002519 |
| TC0200000624.mm.1 | NM_028444           | Prkcdbp | protein kinase C, delta binding protein         | 105480605 | 105482197 | TC0700003978.mm.1  | 1.1  | 0.002521 |
| TC0200000628.mm.1 | NM_145611           | Kank2   | KN motif and ankyrin repeat domains 2           | 21766773  | 21798546  | TC0900001884.mm.1  | 0.4  | 0.002523 |
| TC0200000634.mm.1 | NM_023279           | Tubb3   | tubulin, beta 3 class III                       | 123411424 | 123422015 | TC0800001522.mm.1  | -0.3 | 0.002537 |
| TC0200000636.mm.1 | NM_001081106        | Cyt1l   | cytokine-like 1                                 | 37735519  | 37739820  | TC0500000425.mm.1  | 0.2  | 0.002539 |
| TC0200000638.mm.1 | NM_007652           | Cd59a   | CD59a antigen                                   | 104095801 | 104115410 | TC0200001552.mm.1  | 1.4  | 0.002542 |
| TC0200000657.mm.1 | NM_010353           | Gsg2    | germ cell-specific gene 2                       | 73135484  | 73138294  | TC1100003156.mm.1  | -0.4 | 0.002543 |
| TC0200000673.mm.1 | ENSMUST00000120676  | Gm12712 | predicted gene 12712                            | 72572530  | 72573330  | TC1100003148.mm.1  | -0.7 | 0.002545 |
| TC0200000674.mm.1 | ENSMUST00000121009  | Gm14049 | predicted gene 14049                            | 130987984 | 130988619 | TC0200002000.mm.1  | -0.7 | 0.002552 |
| TC0200000681.mm.1 | OTTMUST000000024892 | RP23-36 | ---                                             | 147281446 | 147281790 | TC0400003984.mm.1  | -0.6 | 0.002572 |
| TC0200000684.mm.1 | NM_011426           | Siglec1 | sialic acid binding Ig-like lectin 1, sialoadhe | 131069220 | 131086765 | TC0200004647.mm.1  | 0.3  | 0.002578 |
| TC0200000685.mm.1 | ENSMUST00000158070  | Gm22334 | predicted gene, 22334                           | 155652892 | 155653024 | TC0200004968.mm.1  | -0.7 | 0.00258  |
| TC0200000699.mm.1 | NM_021282           | Cyp2e1  | cytochrome P450, family 2, subfamily e, polypep | 140763739 | 140774981 | TC0700002023.mm.1  | 2.5  | 0.002587 |
| TC0200000700.mm.1 | NM_009605           | Adipoq  | adiponectin, C1Q and collagen domain containin  | 23146536  | 23158028  | TC1600000331.mm.1  | 1.5  | 0.002599 |
| TC0200000702.mm.1 | OTTMUST00000112139  | RP24-18 | ---                                             | 160893120 | 160893584 | TC0100001458.mm.1  | -0.8 | 0.0026   |
| TC0200000711.mm.1 | ENSMUST00000120191  | Gm11824 | predicted gene 11824                            | 14170066  | 14170911  | TC0400000122.mm.1  | -0.6 | 0.002603 |
| TC0200000720.mm.1 | ENSMUST00000169588  | Gm4775  | predicted gene 4775                             | 106100753 | 106101157 | TC1400002669.mm.1  | -0.3 | 0.002611 |
| TC0200000737.mm.1 | ENSMUST00000117287  | Gm14398 | predicted gene 14398                            | 181216727 | 181217799 | TC0200002816.mm.1  | -0.9 | 0.002613 |
| TC0200000773.mm.1 | ENSMUST00000074648  | Gm10357 | predicted gene 10357                            | 8289846   | 8290115   | TC1300001407.mm.1  | -1.1 | 0.002618 |
| TC0200000797.mm.1 | NM_144731           | Galnt7  | UDP-N-acetyl-alpha-D-galactosamine: polypeptid  | 57523825  | 57653055  | TC0800002256.mm.1  | -0.4 | 0.002621 |
| TC0200000798.mm.1 | NM_030694           | Ifitm2  | interferon induced transmembrane protein 2      | 140954837 | 140955961 | TC0700004513.mm.1  | 1.3  | 0.002629 |
| TC0200000802.mm.1 | NM_018764           | Pcdh7   | protocadherin 7                                 | 57718021  | 58132240  | TC0500000560.mm.1  | 0.5  | 0.002632 |
| TC0200000819.mm.1 | ENSMUST00000119868  | Gm13717 | predicted gene 13717                            | 29750761  | 29751125  | TC0600000244.mm.1  | -0.3 | 0.002634 |
| TC0200000829.mm.1 | NM_009031           | Rbbp7   | retinoblastoma binding protein 7                | 162760372 | 162779092 | TC0X00001651.mm.1  | -0.5 | 0.002634 |

|                   |                     |         |                                                 |           |           |                    |      |          |
|-------------------|---------------------|---------|-------------------------------------------------|-----------|-----------|--------------------|------|----------|
| TC0200000847.mm.1 | ENSMUST00000048361  | Gm5331  | predicted gene 5331                             | 96173940  | 96174365  | TC0500000924.mm.1  | 0.5  | 0.002636 |
| TC0200000848.mm.1 | ENSMUST000000097661 | 5830472 | RIKEN cDNA 5830472F04 gene                      | 87796467  | 87796817  | TC0100000827.mm.1  | -0.2 | 0.002638 |
| TC0200000866.mm.1 | NM_025394           | Tom7    | translocase of outer mitochondrial membrane 7   | 23883944  | 23844161  | TC0500002065.mm.1  | -0.4 | 0.00264  |
| TC0200000874.mm.1 | ENSMUST00000121088  | Gm11307 | predicted gene 11307                            | 22675660  | 22676969  | TC1300000216.mm.1  | -0.5 | 0.002641 |
| TC0200000885.mm.1 | ENSMUST00000163806  | Rpl15-p | ribosomal protein L15, pseudogene 3             | 22185557  | 22186256  | TC0900001901.mm.1  | -0.8 | 0.002651 |
| TC0200000886.mm.1 | XM_485921           | Gm5593  | predicted gene 5593                             | 42105803  | 42107185  | TC0700002918.mm.1  | -1.2 | 0.002655 |
| TC0200000908.mm.1 | ENSMUST00000120180  | Gm12587 | predicted gene 12587                            | 121886542 | 121886968 | TC1100004258.mm.1  | -1.1 | 0.002655 |
| TC0200000920.mm.1 | OTTMUST00000019371  | RP23-21 | ---                                             | 112955075 | 112956286 | TC0400003294.mm.1  | -0.7 | 0.002657 |
| TC0200000926.mm.1 | ENSMUST00000170279  | Rpl26-p | ribosomal protein L26, pseudogene 4             | 17711668  | 17712105  | TC1600000223.mm.1  | -0.4 | 0.002676 |
| TC0200000942.mm.1 | NM_009970           | Csf2ra  | colony stimulating factor 2 receptor, alpha, lo | 61224402  | 61228418  | TC1900001762.mm.1  | 0.6  | 0.002699 |
| TC0200000948.mm.1 | NM_019971           | Pdgfc   | platelet-derived growth factor, C polypeptide   | 81036416  | 81214040  | TC0300000631.mm.1  | 0.4  | 0.002709 |
| TC0200000963.mm.1 | NM_019861           | Ctsf    | cathepsin F                                     | 4855129   | 4860918   | TC1900000046.mm.1  | 0.5  | 0.002738 |
| TC0200000964.mm.1 | ENSMUST00000122473  | Gm25108 | predicted gene, 25108                           | 42275650  | 42275727  | TC0600000457.mm.1  | -0.5 | 0.002769 |
| TC0200000967.mm.1 | NM_177740           | Rgma    | RGM domain family, member A                     | 73375520  | 73419899  | TC0700001064.mm.1  | 0.2  | 0.00277  |
| TC0200000968.mm.1 | NM_010201           | Fgf14   | fibroblast growth factor 14                     | 123977907 | 124677127 | TC1400002764.mm.1  | -0.5 | 0.002779 |
| TC0200000977.mm.1 | NM_009103           | Rrm1    | ribonucleotide reductase M1                     | 102441695 | 102469771 | TC0700001455.mm.1  | -1.3 | 0.002781 |
| TC0200000984.mm.1 | NM_010743           | Il1r1   | interleukin 1 receptor-like 1                   | 40429570  | 40465415  | TC0100000298.mm.1  | 0.2  | 0.002781 |
| TC0200000988.mm.1 | NM_145632           | Polr2h  | polymerase (RNA) II (DNA directed) polypeptide  | 20717665  | 20722267  | TC1600000291.mm.1  | -0.2 | 0.002792 |
| TC0200001002.mm.1 | NM_027343           | Cd209g  | CD209g antigen                                  | 4134733   | 4137707   | TC0800000027.mm.1  | 0.6  | 0.002801 |
| TC0200001010.mm.1 | NM_010008           | Cyp2j6  | cytochrome P450, family 2, subfamily j, polypep | 96516138  | 96553661  | TC0400003097.mm.1  | 0.6  | 0.002801 |
| TC0200001013.mm.1 | NM_007876           | Dpep1   | dipeptidase 1 (renal)                           | 123186235 | 123201813 | TC0800001511.mm.1  | 1.0  | 0.002808 |
| TC0200001020.mm.1 | NM_019577           | Ccl24   | chemokine (C-C motif) ligand 24                 | 135569937 | 135573049 | TC0500003399.mm.1  | 0.4  | 0.002822 |
| TC0200001032.mm.1 | NM_007638           | Cct7    | chaperonin containing Tcp1, subunit 7 (eta)     | 85451505  | 85468477  | TC0600000963.mm.1  | -0.4 | 0.002823 |
| TC0200001034.mm.1 | NM_172892           | Slc13a4 | solute carrier family 13 (sodium/sulfate sympor | 35267953  | 35308131  | TC0600002066.mm.1  | 0.5  | 0.002828 |
| TC0200001060.mm.1 | NM_173758           | Vwa8    | von Willebrand factor A domain containing 8     | 78849178  | 79202310  | TC1400001094.mm.1  | 0.6  | 0.002834 |
| TC0200001063.mm.1 | NM_001034882        | Zbtbd6  | kelch repeat and BTB (POZ) domain containing 6  | 79451835  | 79454816  | TC1400001104.mm.1  | -0.4 | 0.002835 |
| TC0200001068.mm.1 | ENSMUST00000109139  | Aurka   | aurora kinase A                                 | 172356190 | 172370535 | TC02000005271.mm.1 | -0.7 | 0.002839 |
| TC0200001089.mm.1 | NM_207635           | Rps24   | ribosomal protein S24                           | 24490681  | 24496146  | TC1400000231.mm.1  | -0.4 | 0.002843 |
| TC0200001096.mm.1 | NM_008768           | Orm1    | orosomucoid 1                                   | 63344560  | 63348163  | TC0400000718.mm.1  | 1.5  | 0.002843 |
| TC0200001102.mm.1 | NM_011150           | Lgals3b | lectin, galactoside-binding, soluble, 3 binding | 118392751 | 118402092 | TC1100004159.mm.1  | 1.0  | 0.002852 |
| TC0200001107.mm.1 | NM_029537           | Tmem98  | transmembrane protein 98                        | 80810175  | 80822033  | TC1100001209.mm.1  | 0.5  | 0.002874 |
| TC0200001125.mm.1 | NM_024170           | Cxx1a   | CAAX box 1A                                     | 53642488  | 53643763  | TC0X00002241.mm.1  | 0.3  | 0.002897 |
| TC0200001130.mm.1 | ENSMUST00000121977  | Rps2-ps | ribosomal protein S2, pseudogene 4              | 53645744  | 53646376  | TC1100000610.mm.1  | -0.4 | 0.002899 |
| TC0200001137.mm.1 | ENSMUST00000118554  | Gm13167 | predicted gene 13167                            | 146224036 | 146224613 | TC0400003973.mm.1  | -1.9 | 0.002902 |
| TC0200001160.mm.1 | ENSMUST00000118415  | Hmgb1-p | high mobility group box 1, pseudogene 3         | 63846183  | 63846818  | TC1100002965.mm.1  | -1.2 | 0.002908 |
| TC0200001164.mm.1 | NM_009349           | Inmt    | indolethylamine N-methyltransferase             | 55170626  | 55175043  | TC06000002326.mm.1 | 0.4  | 0.002911 |
| TC0200001168.mm.1 | NM_013522           | Frg1    | FSHD region gene 1                              | 41397454  | 41417118  | TC08000002121.mm.1 | -0.4 | 0.002914 |
| TC0200001170.mm.1 | NM_183046           | Kif20b  | kinesin family member 20B                       | 34922358  | 34975731  | TC1900000508.mm.1  | -0.6 | 0.002928 |
| TC0200001174.mm.1 | ENSMUST00000105169  | Gm4294  | predicted gene 4294                             | 12023043  | 12023657  | TC1200000096.mm.1  | -0.9 | 0.002929 |
| TC0200001175.mm.1 | ENSMUST00000118931  | Gm14627 | predicted gene 14627                            | 56190932  | 56191498  | TC0X00000513.mm.1  | -0.4 | 0.002948 |
| TC0200001180.mm.1 | NM_027382           | Hdac8   | histone deacetylase 8                           | 102284639 | 102505359 | TC0X000002741.mm.1 | -0.2 | 0.00295  |
| TC0200001196.mm.1 | NM_008495           | Lgals1  | lectin, galactose binding, soluble 1            | 78926725  | 78930465  | TC1500000658.mm.1  | 1.0  | 0.002968 |
| TC0200001206.mm.1 | NM_009227           | Snrpe   | small nuclear ribonucleoprotein E               | 133603871 | 133610291 | TC0100003092.mm.1  | -0.4 | 0.002983 |
| TC0200001207.mm.1 | NM_198605           | Ska3    | spindle and kinetochore associated complex sub  | 57806561  | 57826163  | TC14000002150.mm.1 | -0.5 | 0.00299  |
| TC0200001208.mm.1 | ENSMUST00000118270  | Gm14923 | predicted gene 14923                            | 112774104 | 112775727 | TC0X00001131.mm.1  | -0.5 | 0.003007 |
| TC0200001209.mm.1 | NM_011300           | Rps7    | ribosomal protein S7                            | 28635953  | 28635953  | TC0200001568.mm.1  | -0.7 | 0.003026 |
| TC0200001210.mm.1 | NM_174857           | Mamdc2  | MAM domain containing 2                         | 23302609  | 23448352  | TC1900001266.mm.1  | 0.4  | 0.003028 |
| TC0200001211.mm.1 | ENSMUST00000158989  | Gm23505 | predicted gene, 23505                           | 51493653  | 51493782  | TC0200003518.mm.1  | -0.6 | 0.003029 |
| TC0200001212.mm.1 | NCBI_Gene:21638:pr  | Tcrg-V4 | T cell receptor gamma, variable 4               | 19184981  | 19185506  | TC1300002761.mm.1  | -0.5 | 0.003031 |
| TC0200001215.mm.1 | NM_021455           | MLXlpl  | MLX interacting protein-like                    | 135106891 | 135138382 | TC0500001575.mm.1  | 0.4  | 0.003035 |
| TC0200001219.mm.1 | ENSMUST00000119727  | Gm6368  | predicted gene 6368                             | 141980175 | 141982321 | TC0X00001398.mm.1  | -0.3 | 0.003043 |
| TC0200001222.mm.1 | NM_144517           | Tbc1d19 | TBC1 domain family, member 19                   | 53809627  | 53904380  | TC0500000542.mm.1  | 0.6  | 0.003047 |
| TC0200001223.mm.1 | ENSMUST00000118629  | Gm6952  | predicted gene 6952                             | 80197081  | 80197239  | TC0X00000533.mm.1  | -0.3 | 0.003052 |
| TC0200001224.mm.1 | NM_134081           | Dnajc9  | DnaJ (Hsp40) homolog, subfamily C, member 9     | 20384638  | 20388910  | TC1400001533.mm.1  | -0.4 | 0.003053 |
| TC0200001225.mm.1 | ENSMUST00000111755  | Nup35   | nucleoporin 35                                  | 116082863 | 116084635 | TC0700004152.mm.1  | -0.4 | 0.003058 |
| TC0200001230.mm.1 | ENSMUST00000073056  | Gm6252  | predicted gene 6252                             | 125219449 | 125219886 | TC0700004252.mm.1  | -0.4 | 0.003073 |
| TC0200001234.mm.1 | ENSMUST00000119775  | Gm6506  | predicted gene 6506                             | 77443285  | 77444420  | TC1500001811.mm.1  | -0.5 | 0.003075 |
| TC0200001238.mm.1 | ENSMUST00000183537  | Gm15013 | predicted gene 15013                            | 139713681 | 139714481 | TC0X00003063.mm.1  | -0.6 | 0.003083 |
| TC0200001241.mm.1 | ENSMUST00000079733  | Gm10036 | predicted gene 10036                            | 15832794  | 15833330  | TC1800000134.mm.1  | -1.1 | 0.003086 |
| TC0200001249.mm.1 | XM_001481032        | Gm10224 | predicted pseudogene 10224                      | 122677578 | 122699028 | TC06000003073.mm.1 | -1.3 | 0.003097 |
| TC0200001260.mm.1 | NM_026038           | L3h3p   | L-3-hydroxyproline dehydratase (trans-)         | 72073428  | 72085439  | TC1200001899.mm.1  | 0.2  | 0.003105 |
| TC0200001264.mm.1 | NM_027930           | Mtfr2   | mitochondrial fission regulator 2               | 20347819  | 20361669  | TC1000000158.mm.1  | -0.3 | 0.003138 |
| TC0200001267.mm.1 | NM_027289           | Nt5dc2  | 5-nucleotidase domain containing 2              | 31134853  | 31139124  | TC1400000322.mm.1  | -0.9 | 0.003141 |
| TC0200001268.mm.1 | XM_001481155        | Gm10166 | 60S ribosomal protein L17, pseudogene           | 36117385  | 36118881  | TC0700000671.mm.1  | -0.5 | 0.003144 |
| TC0200001283.mm.1 | NM_026785           | Ube2c   | ubiquitin-conjugating enzyme E2C                | 164769898 | 164778822 | TC0200000532.mm.1  | -1.0 | 0.003147 |
| TC0200001284.mm.1 | NM_008418           | Kcna3   | potassium voltage-gated channel, shaker-relatec | 107036162 | 107038129 | TC0300001109.mm.1  | -0.8 | 0.003155 |
| TC0200001286.mm.1 | ENSMUST00000164501  | Gm17214 | predicted gene 17214                            | 69320045  | 69320585  | TC03000002134.mm.1 | -0.7 | 0.003163 |
| TC0200001290.mm.1 | NM_001033420        | Dock1   | dicator of cytokinesis 1                        | 134670687 | 135173647 | TC0700001951.mm.1  | 0.5  | 0.003174 |
| TC0200001306.mm.1 | NM_010370           | Gzma    | granzyme A                                      | 113093825 | 113100981 | TC1300002691.mm.1  | -1.0 | 0.003175 |
| TC0200001337.mm.1 | NM_198607           | Them6   | thioesterase superfamily member 6               | 74721234  | 74724373  | TC1500000543.mm.1  | -0.6 | 0.003184 |
| TC0200001345.mm.1 | ENSMUST00000117362  | Gm12568 | predicted gene 12568                            | 46243571  | 46244194  | TC1100002600.mm.1  | -1.0 | 0.003185 |
| TC0200001381.mm.1 | NM_001081019        | Gm12657 | predicted gene 12657                            | 94593650  | 94600319  | TC0400000948.mm.1  | -0.7 | 0.003188 |
| TC0200001397.mm.1 | NM_010119           | Ehd1    | EH-domain containing 1                          | 6276725   | 6300096   | TC1900000111.mm.1  | 0.3  | 0.00319  |
| TC0200001412.mm.1 | NM_145741           | Gdf10   | growth differentiation factor 10                | 33923587  | 33935285  | TC1400000363.mm.1  | 0.9  | 0.003192 |
| TC0200001441.mm.1 | NR_029529           | Mir15b  | microRNA 15b                                    | 69009756  | 69009853  | TC0300000575.mm.1  | -0.5 | 0.003211 |
| TC0200001445.mm.1 | ENSMUST00000120159  | Gm6276  | predicted pseudogene 6276                       | 75165207  | 75165785  | TC1700001168.mm.1  | -0.3 | 0.003219 |
| TC0200001457.mm.1 | ENSMUST00000061746  | Gm7148  | predicted gene 7148                             | 40115358  | 40116071  | TC1700000811.mm.1  | -0.3 | 0.003219 |
| TC0200001467.mm.1 | NM_001198933        | Me1     | malic enzyme 1, NADP(+)-dependent, cytosolic    | 86581363  | 86695914  | TC0900002780.mm.1  | 1.5  | 0.003222 |

|                   |                    |         |                                                 |           |           |                   |      |          |
|-------------------|--------------------|---------|-------------------------------------------------|-----------|-----------|-------------------|------|----------|
| TC0200001469.mm.1 | NM_008212          | Hadh    | hydroxyacyl-Coenzyme A dehydrogenase            | 131233419 | 131272101 | TC0300002955.mm.1 | 1.0  | 0.003242 |
| TC0200001471.mm.1 | ENSMUST00000120838 | Rps18-p | ribosomal protein S18, pseudogene 1             | 71370738  | 71371196  | TC0400002852.mm.1 | -0.9 | 0.003261 |
| TC0200001489.mm.1 | ENSMUST00000119738 | Gm12335 | predicted gene 12335                            | 75066436  | 75066762  | TC1100003212.mm.1 | -0.9 | 0.003262 |
| TC0200001500.mm.1 | XR_140881          | Gm19269 | predicted gene, 19269                           | 57639169  | 57640154  | TC0800002261.mm.1 | -0.3 | 0.003265 |
| TC0200001513.mm.1 | NM_008513          | Lrp5    | low density lipoprotein receptor-related protei | 3584825   | 3686564   | TC1900000882.mm.1 | 0.4  | 0.003275 |
| TC0200001525.mm.1 | NM_007934          | Enpep   | glutamyl aminopeptidase                         | 129269175 | 129332749 | TC0300002926.mm.1 | 0.7  | 0.003286 |
| TC0200001547.mm.1 | NM_178206          | Hist1h3 | histone cluster 1, H3h                          | 21717628  | 21718115  | TC1300000174.mm.1 | -0.8 | 0.003308 |
| TC0200001550.mm.1 | ENSMUST00000053575 | Snrpg   | small nuclear ribonucleoprotein polypeptide G   | 26098872  | 26099257  | TC1700001690.mm.1 | -0.8 | 0.003322 |
| TC0200001551.mm.1 | NCBI_Gene:667596:p | Trav13d | T cell receptor alpha variable 13D-3            | 53032902  | 53033419  | TC1400000653.mm.1 | -0.4 | 0.003329 |
| TC0200001552.mm.1 | NM_008563          | Mcm3    | minichromosome maintenance deficient 3 (S. ce   | 20802974  | 20820278  | TC0100002033.mm.1 | -0.8 | 0.003337 |
| TC0200001553.mm.1 | OTTMUST00000045487 | RP23-15 | ---                                             | 144268049 | 144268204 | TC0X00003122.mm.1 | -1.0 | 0.003338 |
| TC0200001555.mm.1 | NM_001114332       | Slc16a1 | solute carrier family 16 (monocarboxylic acid t | 40033535  | 40142254  | TC1000002036.mm.1 | 0.5  | 0.003339 |
| TC0200001556.mm.1 | NM_026760          | 2310036 | RIKEN cDNA 2310036O22 gene                      | 85026823  | 85030286  | TC0800000976.mm.1 | -0.5 | 0.003355 |
| TC0200001559.mm.1 | NM_130904          |         |                                                 | 3871824   | 3878555   | TC0800001623.mm.1 | 0.4  | 0.003363 |
| TC0200001563.mm.1 | NM_001024726       | Cd209d  | CD209d antigen                                  | 27860585  | 27880825  | TC0700000476.mm.1 | -0.3 | 0.003364 |
| TC0200001571.mm.1 | NM_001083959       | Zfp607  | zinc finger proten 607                          | 172977700 | 172993576 | TC0200002675.mm.1 | -0.4 | 0.003366 |
| TC0200001575.mm.1 | NCBI_Gene:195297:p | Spo11   | SPO11 meiotic protein covalently bound to DSB   | 53743104  | 53743706  | TC1400000708.mm.1 | -0.5 | 0.003394 |
| TC0200001579.mm.1 | NM_026374          | Trav16n | Trav16n T cell receptor alpha variable 16n      | 90476201  | 90488379  | TC0300000799.mm.1 | -0.5 | 0.003397 |
| TC0200001586.mm.1 | NM_013548          | Ilf2    | interleukin enhancer binding factor 2           | 23544052  | 23545312  | TC1300000247.mm.1 | -0.4 | 0.0034   |
| TC0200001589.mm.1 | ENSMUST00000079114 | Hist1h3 | histone cluster 1, H3f                          | 87549062  | 87549451  | TC1600001988.mm.1 | -0.5 | 0.003406 |
| TC0200001592.mm.1 | ENSMUST00000120203 | Rpl31-p | ribosomal protein L31, pseudogene 4             | 126665254 | 126666125 | TC0400001468.mm.1 | -0.6 | 0.003421 |
| TC0200001600.mm.1 | ENSMUST00000167274 | Gm12933 | predicted gene 12933                            | 153826053 | 153826834 | TC0200002325.mm.1 | -0.4 | 0.003426 |
| TC0200001607.mm.1 | ENSMUST00000121585 | Gm14494 | predicted gene 14494                            | 140890887 | 140892080 | TC0700002029.mm.1 | -0.5 | 0.003427 |
| TC0200001616.mm.1 | ENSMUST00000153606 | Gm15542 | predicted gene 15542                            | 36609958  | 36610729  | TC1800000336.mm.1 | -0.6 | 0.003429 |
| TC0200001617.mm.1 | ENSMUST00000120994 | Gm6542  | predicted gene 6542                             | 145844404 | 145844718 | TC0400003969.mm.1 | -0.4 | 0.003437 |
| TC0200001620.mm.1 | ENSMUST00000183926 | Gm13246 | predicted gene 13246                            | 72431127  | 72431643  | TC0900002638.mm.1 | -1.2 | 0.003437 |
| TC0200001630.mm.1 | ENSMUST00000082400 | RP24-28 | N/A                                             | 5192      | 5257      | TC0M00000023.mm.1 | 1.3  | 0.003442 |
| TC0200001644.mm.1 | NM_029364          | mt-Tc   | mitochondrially encoded tRNA cysteine           | 121365090 | 121397253 | TC1000001493.mm.1 | 0.8  | 0.003442 |
| TC0200001651.mm.1 | ENSMUST00000057074 | Gns     | glucosamine (N-acetyl)-6-sulfatase              | 91236787  | 91238116  | TC1700001335.mm.1 | -0.4 | 0.003443 |
| TC0200001663.mm.1 | ENSMUST00000117240 | Nanp    | N-acetylneuraminic acid phosphatase             | 8383182   | 8383853   | TC1100002206.mm.1 | -1.0 | 0.003445 |
| TC0200001675.mm.1 | ENSMUST00000119183 | Gm11989 | predicted gene 11989                            | 22067826  | 22069419  | TC0200000345.mm.1 | 0.2  | 0.003451 |
| TC0200001676.mm.1 | ENSMUST00000121187 | Gm13337 | predicted gene 13337                            | 116839907 | 116840221 | TC0400003353.mm.1 | -0.7 | 0.003483 |
| TC0200001679.mm.1 | ENSMUST00000072166 | Rpl36-p | ribosomal protein L36, pseudogene 8             | 123307508 | 123307939 | TC0900003303.mm.1 | 1.4  | 0.003504 |
| TC0200001681.mm.1 | ENSMUST00000167128 | Scp2-ps | sterol carrier protein 2, pseudogene 2          | 132284447 | 132284809 | TC0100001188.mm.1 | -0.4 | 0.003516 |
| TC0200001701.mm.1 | NM_178196          | Gm7241  | predicted pseudogene 7241                       | 23571396  | 23572014  | TC1300000249.mm.1 | -1.3 | 0.003522 |
| TC0200001722.mm.1 | NM_011962          | Hist1h2 | histone cluster 1, H2bg                         | 136987019 | 136996648 | TC1000001615.mm.1 | 0.5  | 0.003523 |
| TC0200001723.mm.1 | ENSMUST00000184004 | Plod3   | procollagen-lysine, 2-oxoglutarate 5-dioxygenas | 83073223  | 83073388  | TC0900002762.mm.1 | -0.4 | 0.003528 |
| TC0200001729.mm.1 | NM_012052          | RP23-13 | N/A                                             | 99477896  | 99483738  | TC0700003798.mm.1 | -0.4 | 0.003532 |
| TC0200001735.mm.1 | NM_025711          | Rps3    | ribosomal protein S3                            | 49544443  | 49567565  | TC1300000566.mm.1 | 0.9  | 0.003544 |
| TC0200001740.mm.1 | NM_053247          | Aspn    | asporin                                         | 110850607 | 110863059 | TC0700004104.mm.1 | 1.0  | 0.003548 |
| TC0200001748.mm.1 | ENSMUST00000100687 | Lyve1   | lymphatic vessel endothelial hyaluronan recepto | 44596665  | 44597228  | TC1400000470.mm.1 | 1.3  | 0.003561 |
| TC0200001750.mm.1 | ENSMUST00000184266 | Gm16439 | predicted pseudogene 16439                      | 69158671  | 69159519  | TC1400000970.mm.1 | -0.5 | 0.003561 |
| TC0200001751.mm.1 | NM_010663          | RP24-22 | N/A                                             | 100256217 | 100261029 | TC1100003763.mm.1 | -0.7 | 0.003565 |
| TC0200001763.mm.1 | NM_173441          | Krt17   | keratin 17                                      | 32067734  | 32104331  | TC1800000253.mm.1 | -0.4 | 0.003568 |
| TC0200001769.mm.1 | ENSMUST00000120819 | lws1    | LWS1 homolog (S. cerevisiae)                    | 55392317  | 55392701  | TC0400002685.mm.1 | -0.4 | 0.003577 |
| TC0200001777.mm.1 | ENSMUST00000169692 | Gm12516 | predicted gene 12516                            | 47170469  | 47171134  | TC0100001626.mm.1 | -0.3 | 0.003592 |
| TC0200001793.mm.1 | NM_177640          | Gm6970  | predicted gene 6970                             | 18713193  | 18718429  | TC1900000325.mm.1 | -0.2 | 0.003594 |
| TC0200001797.mm.1 | NM_133978          | D030056 | RIKEN cDNA D030056L22 gene                      | 114756836 | 114781993 | TC0900003176.mm.1 | -0.6 | 0.003604 |
| TC0200001808.mm.1 | NM_009104          | Cmtm7   | CKLF-like MARVEL transmembrane domain conti     | 24708241  | 24714146  | TC1200000203.mm.1 | -1.3 | 0.003614 |
| TC0200001812.mm.1 | NM_172253          | Rrm2    | ribonucleotide reductase M2                     | 33429624  | 33439380  | TC1200000294.mm.1 | -0.7 | 0.003615 |
| TC0200001819.mm.1 | NM_013730          | Twistnb | TWIST neighbor                                  | 171767127 | 171801184 | TC0100001600.mm.1 | -0.7 | 0.003618 |
| TC0200001831.mm.1 | NM_175160          | Slamf1  | signaling lymphocytic activation molecule famil | 105472425 | 105496870 | TC0800002823.mm.1 | 0.3  | 0.003623 |
| TC0200001842.mm.1 | NM_024266          | Zdhhc1  | zinc finger, DHHC domain containing 1           | 44407697  | 44410406  | TC0900000511.mm.1 | -0.7 | 0.003627 |
| TC0200001843.mm.1 | NM_198052          | Rps25   | ribosomal protein S25                           | 119670669 | 119684724 | TC0500001327.mm.1 | 0.2  | 0.003634 |
| TC0200001850.mm.1 | NM_030234          | Tbx3    | T-box 3                                         | 121506723 | 121544860 | TC0200001819.mm.1 | -0.6 | 0.003643 |
| TC0200001853.mm.1 | ENSMUST00000073088 | Wdr76   | WD repeat domain 76                             | 24493207  | 247143656 | TC1200001534.mm.1 | -0.3 | 0.003646 |
| TC0200001863.mm.1 | NM_008565          | Gm16372 | predicted pseudogene 16372                      | 15623897  | 15637400  | TC1600001254.mm.1 | -0.8 | 0.003651 |
| TC0200001876.mm.1 | NM_001038614       | Mcm4    | minichromosome maintenance deficient 4 homc     | 28192992  | 28230736  | TC0200000480.mm.1 | 0.7  | 0.003717 |
| TC0200001879.mm.1 | NCBI_Gene:621968:p | Olfm1   | olfactomedin 1                                  | 40891229  | 40891887  | TC0600000417.mm.1 | -1.2 | 0.003731 |
| TC0200001886.mm.1 | ENSMUST00000118871 | Trbv1   | T cell receptor beta, variable 1                | 110118022 | 110118849 | TC0500002982.mm.1 | -0.8 | 0.003733 |
| TC0200001896.mm.1 | NM_019402          | Pabpn1  | poly(A) binding protein, nuclear 1              | 54892500  | 54898927  | TC1400002832.mm.1 | -0.3 | 0.00375  |
| TC0200001900.mm.1 | NM_010615          | Kif11   | kinesin family member 11                        | 37376403  | 37421859  | TC1900000529.mm.1 | -1.6 | 0.003764 |
| TC0200001905.mm.1 | NM_025915          | Tmem88  | transmembrane protein 88                        | 69396516  | 69398234  | TC1100003042.mm.1 | 0.5  | 0.003778 |
| TC0200001906.mm.1 | NM_172598          | Wdhd1   | WD repeat and HMG-box DNA binding protein 1     | 47240944  | 47276857  | TC1400001931.mm.1 | -0.5 | 0.00379  |
| TC0200001909.mm.1 | NM_126166          | Tlr3    | toll-like receptor 3                            | 45395665  | 45410608  | TC0800002146.mm.1 | 0.3  | 0.003792 |
| TC0200001910.mm.1 | NR_030454          | Mir684- | microRNA 684-1                                  | 20176131  | 20177124  | TC1600001338.mm.1 | -0.6 | 0.003797 |
| TC0200001911.mm.1 | NM_030206          | Cygb    | cytoglobin                                      | 116645595 | 116654313 | TC1100004123.mm.1 | 0.3  | 0.003799 |
| TC0200001919.mm.1 | ENSMUST00000071184 | Rpl10a- | ribosomal protein L10A, pseudogene 2            | 8940333   | 8940977   | TC1300001414.mm.1 | -0.3 | 0.003803 |
| TC0200001923.mm.1 | NM_024245          | Kif23   | kinesin family member 23                        | 61917277  | 61946799  | TC0900002451.mm.1 | -0.6 | 0.003806 |
| TC0200001939.mm.1 | ENSMUST00000121569 | Smt3h2- | SMT3 suppressor of mif two 3 homolog 2, pseud   | 14839869  | 14840156  | TC0100001988.mm.1 | -0.8 | 0.00383  |
| TC0200001949.mm.1 | NM_019551          | Tdp2    | tyrosyl-DNA phosphodiesterase 2                 | 24831659  | 24842153  | TC1300000280.mm.1 | -0.2 | 0.003836 |
| TC0200001962.mm.1 | NM_026576          | Etaa1   | Ewings tumor-associated antigen 1               | 17938749  | 17953875  | TC1100002255.mm.1 | -0.4 | 0.003839 |
| TC0200001966.mm.1 | NM_009601          | Chrnbl  | cholinergic receptor, nicotinic, beta polypepti | 69784036  | 69795943  | TC1100003063.mm.1 | 0.2  | 0.003867 |
| TC0200001967.mm.1 | ENSMUST00000085632 | Rpl23a- | ribosomal protein 23A, pseudogene 1             | 45981548  | 45982015  | TC0100000352.mm.1 | -0.5 | 0.003885 |
| TC0200001973.mm.1 | ENSMUST00000118217 | Gm6023  | predicted gene 6023                             | 36213524  | 36214129  | TC0X00002042.mm.1 | -0.7 | 0.003905 |
| TC0200001981.mm.1 | ENSMUST00000179892 | Gm14253 | predicted gene 14253                            | 156346804 | 156347997 | TC0200004987.mm.1 | -0.7 | 0.003927 |
| TC0200001985.mm.1 | NM_001034880       | Gm5460  | predicted gene 5460                             | 34041078  | 34046981  | TC1400000366.mm.1 | 0.3  | 0.003933 |
| TC0200001990.mm.1 | NM_009779          | C3ar1   | complement component 3a receptor 1              | 122847138 | 122856161 | TC0600003079.mm.1 | 0.8  | 0.003954 |

|                   |                    |          |                                                 |           |           |                   |      |          |
|-------------------|--------------------|----------|-------------------------------------------------|-----------|-----------|-------------------|------|----------|
| TC0200001991.mm.1 | NM_029249          | Parbp    | PARP1 binding protein                           | 88091398  | 88146941  | TC1000002639.mm.1 | -0.5 | 0.003957 |
| TC0200001997.mm.1 | NM_152810          | Cdc5l    | cell division cycle 5-like (S. pombe)           | 45391887  | 45433707  | TC1700002145.mm.1 | -0.6 | 0.00397  |
| TC0200002000.mm.1 | NCBI_Gene:16016;pr | ldhg2b   | immunoglobulin heavy constant gamma 2B          | 113302967 | 113307933 | TC1200002539.mm.1 | -1.3 | 0.003978 |
| TC0200002005.mm.1 | ENSMUST00000117939 | Rps13-p  | ribosomal protein S13, pseudogene 5             | 61205720  | 61206175  | TC1100002906.mm.1 | -0.7 | 0.003979 |
| TC0200002006.mm.1 | ENSMUST00000121188 | Gm13365  | predicted gene 13365                            | 15396750  | 15397716  | TC0200000267.mm.1 | 0.2  | 0.003986 |
| TC0200002021.mm.1 | NM_001170395       | Cd163    | CD163 antigen                                   | 124304651 | 124330527 | TC0600001418.mm.1 | 0.6  | 0.003989 |
| TC0200002029.mm.1 | NM_001101561       | Gm6251   | predicted gene 6251                             | 20208439  | 20209030  | TC1000000152.mm.1 | -0.9 | 0.003993 |
| TC0200002039.mm.1 | NM_001168512       | Ffar2    | free fatty acid receptor 2                      | 30818357  | 30823775  | TC0700002776.mm.1 | 0.2  | 0.003995 |
| TC0200002044.mm.1 | NM_178211          | Hist1h4  | histone cluster 1, H4k                          | 21750142  | 21750553  | TC1300001557.mm.1 | -0.5 | 0.004006 |
| TC0200002046.mm.1 | NCBI_Gene:630086;p | Trav12-  | Trav12-1 T cell receptor alpha variable 12-1    | 53538260  | 53724937  | TC1400000700.mm.1 | -0.5 | 0.004016 |
| TC0200002049.mm.1 | NM_008628          | Msh2     | mutS homolog 2 (E. coli)                        | 87672330  | 87723713  | TC1700001313.mm.1 | -0.5 | 0.004022 |
| TC0200002075.mm.1 | ENSMUST00000093546 | Gm5670   | predicted gene 5670                             | 22558082  | 22558453  | TC1400001565.mm.1 | -0.2 | 0.004023 |
| TC0200002088.mm.1 | NM_011081          | Piga     | phosphatidylinositol glycan anchor biosynthesis | 164419787 | 164433916 | TC0X00001668.mm.1 | -0.2 | 0.004023 |
| TC0200002094.mm.1 | NR_029471          | Rps15a-  | ribosomal protein S15A, pseudogene 6            | 6172508   | 6173331   | TC1100002163.mm.1 | -0.4 | 0.004034 |
| TC0200002116.mm.1 | NM_010497          | ldh1     | isocitrate dehydrogenase 1 (NADP+), soluble     | 65158616  | 65186479  | TC0100002481.mm.1 | 0.7  | 0.004049 |
| TC0200002122.mm.1 | ENSMUST00000120291 | Glns-ps  | glutamine synthetase pseudogene 1               | 19720355  | 19721472  | TC1100000185.mm.1 | 1.1  | 0.00405  |
| TC0200002124.mm.1 | NM_008354          | Il12rb2  | interleukin 12 receptor, beta 2                 | 67291318  | 67376188  | TC0600002423.mm.1 | -0.5 | 0.00406  |
| TC0200002129.mm.1 | ENSMUST00000146791 | Gm12091  | predicted gene 12091                            | 29601784  | 29602613  | TC1100002423.mm.1 | -0.3 | 0.004062 |
| TC0200002134.mm.1 | XR_001587          | Gm6252   | predicted gene 6252                             | 9215845   | 9217505   | TC1900000174.mm.1 | -0.3 | 0.004068 |
| TC0200002136.mm.1 | ENSMUST00000121866 | Gm13007  | predicted gene 13007                            | 135997523 | 135997887 | TC0400001672.mm.1 | -0.9 | 0.004086 |
| TC0200002151.mm.1 | NM_012039          | Zw10     | zw10 kinetochore protein                        | 49055581  | 49078773  | TC0900000590.mm.1 | -0.3 | 0.004094 |
| TC0200002166.mm.1 | ENSMUST00000117614 | Gm11531  | predicted gene 11531                            | 96392112  | 96392666  | TC1100001503.mm.1 | -1.0 | 0.004103 |
| TC0200002168.mm.1 | NM_021436          | Tmeff1   | transmembrane protein with EGF-like and two fr  | 48585174  | 48663131  | TC0400000535.mm.1 | 0.3  | 0.004141 |
| TC0200002174.mm.1 | NM_010327          | Gp1bb    | glycoprotein Ib, beta polypeptide               | 18620319  | 18629939  | TC1600001319.mm.1 | 0.2  | 0.004178 |
| TC0200002183.mm.1 | NM_010638          | Klf9     | Kruppel-like factor 9                           | 23141226  | 23166911  | TC1900000373.mm.1 | 0.8  | 0.00418  |
| TC0200002196.mm.1 | NM_010424          | Hfe      | hemochromatosis                                 | 23702034  | 23710854  | TC1300001641.mm.1 | 0.9  | 0.004206 |
| TC0200002197.mm.1 | NM_013459          | Cfd      | complement factor D (adipsin)                   | 79890853  | 79892656  | TC1000000824.mm.1 | 2.2  | 0.004207 |
| TC0200002207.mm.1 | ENSMUST00000117602 | Gm15148  | predicted gene 15148                            | 151493114 | 151493269 | TC0X00003180.mm.1 | -1.0 | 0.004215 |
| TC0200002211.mm.1 | ENSMUST00000177264 | Gm6695   | predicted gene 6695                             | 58091076  | 58092669  | TC0600000702.mm.1 | -0.6 | 0.004216 |
| TC0200002213.mm.1 | NM_145541          | Rap1a    | RAS-related protein-1a                          | 105727260 | 105801381 | TC0300002674.mm.1 | -0.5 | 0.004216 |
| TC0200002214.mm.1 | NCBI_Gene:10012468 | Trbv17   | T cell receptor beta, variable 17               | 41163062  | 41163556  | TC0600000429.mm.1 | -1.5 | 0.004218 |
| TC0200002215.mm.1 | NM_011458          | Serpina  | serine (or cysteine) peptidase inhibitor, clade | 104338486 | 104394257 | TC1200001044.mm.1 | 0.5  | 0.004223 |
| TC0200002219.mm.1 | NR_030609          | Mir511   | microRNA 511                                    | 14261003  | 14261081  | TC0200000246.mm.1 | 0.2  | 0.004254 |
| TC0200002223.mm.1 | ENSMUST00000140065 | Gm6969   | predicted pseudogene 6969                       | 24638669  | 24639010  | TC1200001535.mm.1 | -0.6 | 0.004277 |
| TC0200002228.mm.1 | NM_001001183       | Tmem204  | transmembrane protein 204                       | 25057702  | 25081181  | TC1700001652.mm.1 | 0.3  | 0.004281 |
| TC0200002231.mm.1 | NM_001113417       | Thrb     | thyroid hormone receptor beta                   | 17660960  | 18038088  | TC1400000135.mm.1 | 0.4  | 0.004302 |
| TC0200002232.mm.1 | ENSMUST00000118760 | Gm13233  | predicted gene 13233                            | 146580629 | 146582312 | TC0400001887.mm.1 | 0.7  | 0.004304 |
| TC0200002236.mm.1 | NM_025440          | Mrps16   | mitochondrial ribosomal protein S16             | 20391227  | 20393555  | TC1400001535.mm.1 | -0.3 | 0.004316 |
| TC0200002259.mm.1 | NM_010830          | Msh6     | mutS homolog 6 (E. coli)                        | 87975050  | 87990892  | TC1700001315.mm.1 | -0.9 | 0.004326 |
| TC0200002260.mm.1 | ENSMUST00000160308 | Rps19-p  | ribosomal protein S19, pseudogene 11            | 43373488  | 43373920  | TC1000002083.mm.1 | -0.5 | 0.004329 |
| TC0200002261.mm.1 | NM_153526          | Insig1   | insulin induced gene 1                          | 28071363  | 28078662  | TC0200000260.mm.1 | 0.9  | 0.00433  |
| TC0200002272.mm.1 | XR_141116          | Gm10933  | predicted gene 10933                            | 35055101  | 35056959  | TC1200000304.mm.1 | -0.2 | 0.004338 |
| TC0200002276.mm.1 | NM_033037          | Cdo1     | cysteine dioxygenase 1, cytosolic               | 46713205  | 46728342  | TC1800001307.mm.1 | 2.4  | 0.004338 |
| TC0200002281.mm.1 | NM_001190717       | Dbf4     | DBF4 homolog (S. cerevisiae)                    | 8396969   | 8422716   | TC0500001931.mm.1 | -0.4 | 0.004341 |
| TC0200002291.mm.1 | NM_001197046       | Fgfr1op  | Fgfr1 oncogene partner                          | 8165501   | 8196804   | TC1700000081.mm.1 | -0.3 | 0.004355 |
| TC0200002296.mm.1 | ENSMUST00000120980 | Gm13461  | predicted gene 13461                            | 41987473  | 41988829  | TC0200003455.mm.1 | -0.6 | 0.004369 |
| TC0200002298.mm.1 | NM_139206          | Arap3    | ArfGAP with RhoGAP domain, ankyrin repeat an    | 37972623  | 37998969  | TC1800001222.mm.1 | 0.2  | 0.004373 |
| TC0200002299.mm.1 | NM_011119          | Pa2g4    | proliferation-associated 2G4                    | 128557766 | 128565934 | TC1000003152.mm.1 | -0.7 | 0.004382 |
| TC0200002300.mm.1 | NM_145588          | Kif22    | kinesin family member 22                        | 127027731 | 127042420 | TC0700004310.mm.1 | -0.7 | 0.004389 |
| TC0200002308.mm.1 | OTTMUST00000001770 | RP23-39  | ---                                             | 83027500  | 83027997  | TC1100003384.mm.1 | -1.3 | 0.004394 |
| TC0200002312.mm.1 | NM_016661          | Ahcy     | S-adenosylhomocysteine hydrolase                | 155059310 | 155074497 | TC0200004953.mm.1 | -0.4 | 0.004401 |
| TC0200002314.mm.1 | NM_010892          | Nek2     | NIMA (never in mitosis gene a)-related expresse | 191821444 | 191833050 | TC0100001858.mm.1 | -0.5 | 0.004414 |
| TC0200002325.mm.1 | NM_177794          | Tmem26   | transmembrane protein 26                        | 68723746  | 68782654  | TC1000000653.mm.1 | -0.2 | 0.004417 |
| TC0200002349.mm.1 | NM_207649          | Rcan2    | regulator of calcineurin 2                      | 43801851  | 44039516  | TC1700000839.mm.1 | 0.2  | 0.004426 |
| TC0200002362.mm.1 | NM_175483          | Snx33    | sorting nexin 33                                | 56917200  | 56928371  | TC0900002359.mm.1 | 0.5  | 0.004427 |
| TC0200002363.mm.1 | NM_018753          | Ywhab    | tyrosine 3-monooxygenase/tryptophan 5-monoc     | 163994960 | 164018588 | TC0200002499.mm.1 | 0.7  | 0.004431 |
| TC0200002364.mm.1 | NM_011515          | Vamp7    | vesicle-associated membrane protein 7           | 10738     | 39148     | TCX_GL456233_rand | -0.4 | 0.004439 |
| TC0200002374.mm.1 | ENSMUST00000081132 | Gm5848   | predicted pseudogene 5848                       | 53525703  | 53526059  | TC1300000619.mm.1 | -0.5 | 0.004446 |
| TC0200002382.mm.1 | NCBI_Gene:10012466 | Trbv4    | T cell receptor beta, variable 10               | 41055883  | 41063102  | TC0600003492.mm.1 | -1.3 | 0.004447 |
| TC0200002402.mm.1 | ENSMUST00000083022 | Trm24918 | predicted gene, 24918                           | 3352657   | 3352786   | TC0900000014.mm.1 | -0.3 | 0.004451 |
| TC0200002417.mm.1 | ENSMUST00000056396 | Sarnp    | SAP domain containing ribonucleoprotein         | 23675844  | 23676712  | TC1900000381.mm.1 | -0.5 | 0.004453 |
| TC0200002419.mm.1 | NR_038089          | Gm6654   | predicted pseudogene 6654                       | 146647177 | 146647802 | TC0600003441.mm.1 | -0.4 | 0.004456 |
| TC0200002421.mm.1 | NM_029321          | Ttc32    | tetratricopeptide repeat domain 32              | 9029997   | 9036397   | TC1200000075.mm.1 | -0.2 | 0.004472 |
| TC0200002426.mm.1 | NM_134102          | Pla1a    | phospholipase A1 member A                       | 38396117  | 38433145  | TC1600001604.mm.1 | 0.6  | 0.004481 |
| TC0200002428.mm.1 | ENSMUST00000119632 | Gm15607  | predicted gene 15607                            | 135637139 | 135637496 | TC0500003401.mm.1 | -0.5 | 0.004482 |
| TC0200002434.mm.1 | NM_175204          | Psmb11   | proteasome (prosome, macropain) subunit, beta   | 54625310  | 54629556  | TC1400000753.mm.1 | -1.5 | 0.004494 |
| TC0200002438.mm.1 | NM_029008          | 4833403  | RIKEN cDNA 483340315 gene                       | 46850039  | 46905446  | TC1800000488.mm.1 | 0.2  | 0.004495 |
| TC0200002441.mm.1 | ENSMUST00000159750 | Rps19-p  | ribosomal protein S19, pseudogene 10            | 52384659  | 52385093  | TC1000002158.mm.1 | -0.7 | 0.004524 |
| TC0200002442.mm.1 | ENSMUST00000119636 | Gm14131  | predicted gene 14131                            | 149356687 | 149357405 | TC0200002207.mm.1 | -0.4 | 0.004525 |
| TC0200002445.mm.1 | ENSMUST00000117906 | Gm14127  | predicted gene 14127                            | 150469411 | 150470165 | TC0200004838.mm.1 | -0.5 | 0.004546 |
| TC0200002451.mm.1 | ENSMUST00000061073 | Gm5812   | predicted gene 5812                             | 6121208   | 6122164   | TC1700001379.mm.1 | -0.5 | 0.004564 |
| TC0200002464.mm.1 | NM_009105          | Rsu1     | Ras suppressor protein 1                        | 13076967  | 13271431  | TC0200002982.mm.1 | 0.5  | 0.004567 |
| TC0200002473.mm.1 | NR_036616          | Srsf9    | serine/arginine-rich splicing factor 9          | 115327177 | 115333080 | TC0500001255.mm.1 | -0.3 | 0.004575 |
| TC0200002476.mm.1 | ENSMUST00000147976 | Rin2     | Ras and Rab interactor 2                        | 145784734 | 145887616 | TC0200002166.mm.1 | 0.3  | 0.004589 |
| TC0200002477.mm.1 | ENSMUST00000077389 | Gm8213   | predicted pseudogene 8213 // predicted gene 1   | 24333046  | 24333552  | TC0300000148.mm.1 | -0.5 | 0.004606 |
| TC0200002480.mm.1 | ENSMUST00000121488 | Gm6451   | predicted gene 6451                             | 151413668 | 151414384 | TC0X00003179.mm.1 | -0.5 | 0.004612 |
| TC0200002482.mm.1 | XM_620258          | Gm6139   | predicted gene 6139                             | 129622946 | 129623871 | TC0500003304.mm.1 | -0.6 | 0.004613 |
| TC0200002489.mm.1 | ENSMUST00000122355 | Gm11760  | predicted gene 11760                            | 74044388  | 74045183  | TC0400000775.mm.1 | -0.3 | 0.004623 |

|                   |                    |         |                                                 |           |           |                    |      |          |
|-------------------|--------------------|---------|-------------------------------------------------|-----------|-----------|--------------------|------|----------|
| TC0200002499.mm.1 | ENSMUST00000117843 | Gm15673 | predicted gene 15673                            | 101238341 | 101239278 | TC0700001428.mm.1  | -0.3 | 0.004628 |
| TC0200002517.mm.1 | ENSMUST00000117531 | Gm14044 | predicted gene 14044                            | 130384883 | 130385329 | TC0200004621.mm.1  | -0.7 | 0.004634 |
| TC0200002523.mm.1 | ENSMUST00000122326 | Gm14045 | predicted gene 14045                            | 129378271 | 129379396 | TC0200004603.mm.1  | -0.4 | 0.004637 |
| TC0200002530.mm.1 | NM_146015          | Efemp1  | epidermal growth factor-containing fibulin-like | 28853204  | 28926743  | TC1100000284.mm.1  | 1.4  | 0.004648 |
| TC0200002532.mm.1 | ENSMUST00000122215 | Anp32b- | Bacidic (leucine-rich) nuclear phosphoprotein 3 | 143389659 | 143390417 | TC0400001823.mm.1  | -0.9 | 0.004686 |
| TC0200002562.mm.1 | NM_008669          | Naga    | N-acetyl galactosaminidase, alpha               | 82329532  | 82338826  | TC1500001942.mm.1  | 0.3  | 0.004693 |
| TC0200002573.mm.1 | ENSMUST00000179988 | Gm25701 | predicted gene, 25701                           | 10477710  | 10477836  | TC0200000113.mm.1  | -0.3 | 0.0047   |
| TC0200002574.mm.1 | ENSMUST00000180199 | Gm26431 | predicted gene, 26431                           | 10487507  | 10487633  | TC0200000135.mm.1  | -0.3 | 0.0047   |
| TC0200002580.mm.1 | ENSMUST00000179934 | Gm24488 | predicted gene, 24488                           | 10494882  | 10495008  | TC0200000153.mm.1  | -0.3 | 0.0047   |
| TC0200002581.mm.1 | ENSMUST00000118949 | Gm12435 | predicted gene 12435                            | 48344215  | 48345230  | TC04000002624.mm.1 | -0.9 | 0.004723 |
| TC0200002589.mm.1 | NM_173024          | Serpina | serine (or cysteine) peptidase inhibitor, clade | 104127996 | 104139545 | TC1200001039.mm.1  | 0.5  | 0.004759 |
| TC0200002594.mm.1 | NR_029825          | Mir7-1  | microRNA 7-1                                    | 58392779  | 58392886  | TC1300002100.mm.1  | -0.4 | 0.00476  |
| TC0200002606.mm.1 | NM_026368          | Caap1   | caspase activity and apoptosis inhibitor 1      | 94500079  | 94556796  | TC0400003071.mm.1  | -0.3 | 0.00476  |
| TC0200002611.mm.1 | ENSMUST00000103281 | Trbv29  | T cell receptor beta, variable 29               | 41271403  | 41271881  | TC0600000434.mm.1  | -1.7 | 0.00476  |
| TC0200002613.mm.1 | NM_013805          | Cldn5   | claudin 5                                       | 18776847  | 18778262  | TC1600000249.mm.1  | 0.9  | 0.004781 |
| TC0200002620.mm.1 | NM_023716          | Tubb2b  | tubulin, beta 2B class IIB                      | 34127008  | 34130354  | TC1300001781.mm.1  | -0.9 | 0.004784 |
| TC0200002640.mm.1 | NR_030556          | Mir327  | microRNA 327                                    | 44947443  | 44947511  | TC1400001893.mm.1  | 0.3  | 0.004784 |
| TC0200002645.mm.1 | NR_030556          | Mir327  | microRNA 327                                    | 0         | 0         | TSUnmapped0000012  | 0.3  | 0.004784 |
| TC0200002666.mm.1 | NM_011391          | Slc16a7 | solute carrier family 16 (monocarboxylic acid t | 125226464 | 125328963 | TC1000003078.mm.1  | 0.7  | 0.004797 |
| TC0200002667.mm.1 | NM_001122603       | Fcgbp   | Fc fragment of IgG binding protein              | 28071236  | 28120864  | TC0700000484.mm.1  | -0.9 | 0.004812 |
| TC0200002669.mm.1 | NM_001290014       | Pemt    | phosphatidylethanolamine N-methyltransferase    | 0         | 0         | TSUnmapped0000003  | 0.2  | 0.004825 |
| TC0200002675.mm.1 | NCBI_Gene:10012429 | Traj59  | T cell receptor alpha joining 59                | 54156133  | 54156196  | TC1400000725.mm.1  | -0.8 | 0.004837 |
| TC0200002678.mm.1 | NM_011682          | Utrn    | utrophin                                        | 12382188  | 12869365  | TC1000001755.mm.1  | 0.7  | 0.004843 |
| TC0200002683.mm.1 | NM_009438          | Rpl13a  | ribosomal protein L13A                          | 45125558  | 45128748  | TC0700004648.mm.1  | -0.3 | 0.004853 |
| TC0200002698.mm.1 | NM_033573          | Prcc    | papillary renal cell carcinoma (translocation-a | 87858900  | 87885608  | TC03000002292.mm.1 | -0.3 | 0.004857 |
| TC0200002699.mm.1 | ENSMUST00000179957 | Gm25673 | predicted gene, 25673                           | 10502191  | 10502317  | TC0200000171.mm.1  | -0.3 | 0.004863 |
| TC0200002701.mm.1 | ENSMUST00000140537 | Gm13316 | predicted gene 13316                            | 14811848  | 14812538  | TC0200003003.mm.1  | -0.6 | 0.004874 |
| TC0200002703.mm.1 | NCBI_Gene:10010148 | Trav10d | T cell receptor alpha variable 10D              | 52810934  | 52811496  | TC1400000630.mm.1  | -0.4 | 0.004886 |
| TC0200002706.mm.1 | ENSMUST00000077163 | Gm11361 | predicted pseudogene 11361                      | 28257636  | 28258094  | TC1300000310.mm.1  | -0.8 | 0.004889 |
| TC0200002712.mm.1 | NM_172506          | Boc     | biregional cell adhesion molecule-related/down- | 44485045  | 44558897  | TC1600001643.mm.1  | 0.4  | 0.00491  |
| TC0200002713.mm.1 | NM_024184          | Asf1b   | ASF1 anti-silencing function 1 homolog B (S. ce | 83955507  | 83970197  | TC0800000937.mm.1  | -0.8 | 0.004927 |
| TC0200002715.mm.1 | XM_003085380       | Gm19505 | predicted gene, 19505                           | 6027533   | 6027865   | TC1900000996.mm.1  | -0.4 | 0.004937 |
| TC0200002730.mm.1 | ENSMUST00000122095 | Gm15546 | predicted gene 15546                            | 121471563 | 121472388 | TC0500003189.mm.1  | 0.2  | 0.004949 |
| TC0200002731.mm.1 | NM_029975          | Ulbp1   | UL16 binding protein 1                          | 7444873   | 7473477   | TC1000001696.mm.1  | -0.5 | 0.004955 |
| TC0200002732.mm.1 | ENSMUST00000119589 | Gm16071 | predicted gene 16071                            | 31094202  | 31094994  | TC0900000274.mm.1  | -0.2 | 0.004955 |
| TC0200002734.mm.1 | ENSMUST00000052615 | Gm9800  | predicted gene 9800                             | 8799589   | 8800504   | TC1400001442.mm.1  | -1.0 | 0.004965 |
| TC0200002735.mm.1 | NM_017480          | Icos    | inducible T cell co-stimulator                  | 60977914  | 61000321  | TC1000000490.mm.1  | -0.5 | 0.004973 |
| TC0200002736.mm.1 | NM_010436          | H2afx   | H2A histone family, member X                    | 44334694  | 44336077  | TC0900000505.mm.1  | -1.3 | 0.004975 |
| TC0200002738.mm.1 | ENSMUST00000184369 | Gm17190 | predicted gene 17190                            | 96082054  | 96083231  | TC1300001084.mm.1  | -0.6 | 0.004986 |
| TC0200002741.mm.1 | NM_026662          | Prps2   | phosphoribosyl pyrophosphate synthetase 2       | 167346322 | 167382749 | TC0X00003361.mm.1  | -1.0 | 0.004987 |
| TC0200002746.mm.1 | NM_133792          | Pla2g15 | phospholipase A2, group XV                      | 106150399 | 106164715 | TC0800001244.mm.1  | 0.6  | 0.005005 |
| TC0200002747.mm.1 | NM_001166407       | Kif20a  | kinesin family member 20A                       | 34624624  | 34633277  | TC1800000291.mm.1  | -0.7 | 0.005006 |
| TC0200002748.mm.1 | NM_011421          | Smpd1   | sphingomyelin phosphodiesterase 1, acid lysosoi | 105554360 | 105558389 | TC0700001554.mm.1  | 0.3  | 0.005015 |
| TC0200002752.mm.1 | NM_001037859       | Csf1r   | colony stimulating factor 1 receptor            | 61105572  | 61132149  | TC1800000625.mm.1  | 0.7  | 0.005019 |
| TC0200002755.mm.1 | ENSMUST00000122244 | Gm5648  | predicted pseudogene 5648                       | 121334988 | 121336574 | TC0X00002916.mm.1  | -1.0 | 0.005077 |
| TC0200002768.mm.1 | ENSMUST00000085128 | Rpl31-p | ribosomal protein L31, pseudogene 1             | 91890896  | 91891273  | TC1200002159.mm.1  | -1.2 | 0.005078 |
| TC0200002796.mm.1 | NM_134188          | Acot2   | acyl-CoA thioesterase 2                         | 83987861  | 83993877  | TC1200000797.mm.1  | 0.7  | 0.005107 |
| TC0200002798.mm.1 | NM_001101445       | Cyp4f17 | cytochrome P450, family 4, subfamily f, polypep | 32506462  | 32528894  | TC1700000563.mm.1  | 0.3  | 0.00512  |
| TC0200002805.mm.1 | NM_025422          | Cd302   | CD302 antigen                                   | 60251993  | 60284488  | TC0200003599.mm.1  | 0.8  | 0.005129 |
| TC0200002816.mm.1 | NM_029075          | Stx11   | syntaxin 11                                     | 12939983  | 12964259  | TC1000001761.mm.1  | -0.2 | 0.005135 |
| TC0200002819.mm.1 | NM_008532          | Epcam   | epithelial cell adhesion molecule               | 87635979  | 87651129  | TC1700001312.mm.1  | -0.4 | 0.005135 |
| TC0200002836.mm.1 | ENSMUST00000164656 | Gm3326  | predicted gene 3326                             | 5214084   | 5215126   | TC1400001388.mm.1  | -0.3 | 0.005137 |
| TC0200002837.mm.1 | NM_001001981       | Utp14b  | UTP14, U3 small nucleolar ribonucleoprotein, hc | 78657825  | 78707743  | TC0100000682.mm.1  | -0.3 | 0.005143 |
| TC0200002841.mm.1 | NM_147220          | Abca9   | ATP-binding cassette, sub-family A (ABC1), mem  | 110100749 | 110168196 | TC1100004000.mm.1  | 0.7  | 0.005154 |
| TC0200002843.mm.1 | BC119390           | Phxr2   | per-hexamer repeat gene 2                       | 99125167  | 99126325  | TC1000002759.mm.1  | -0.5 | 0.005176 |
| TC0200002844.mm.1 | ENSMUST00000122046 | Gm8080  | predicted gene 8080                             | 107020137 | 107025325 | TC0100002902.mm.1  | -0.5 | 0.005186 |
| TC0200002846.mm.1 | NM_019737          | B4galt6 | UDP-Gal:betaGlcNAc beta 1,4-galactosyltransfer  | 20684599  | 20746404  | TC1800001048.mm.1  | 0.6  | 0.005193 |
| TC0200002859.mm.1 | ENSMUST00000119790 | Gm13680 | predicted gene 13680                            | 83353157  | 83353949  | TC0200003854.mm.1  | -0.8 | 0.005195 |
| TC0200002864.mm.1 | NM_031405          | Srrt    | serrate RNA effector molecule homolog (Arabid   | 137295704 | 137307674 | TC0500003439.mm.1  | -0.4 | 0.005196 |
| TC0200002872.mm.1 | NM_007634          | Ccnf    | cyclin F                                        | 24223228  | 24251409  | TC1700001622.mm.1  | -0.7 | 0.00521  |
| TC0200002882.mm.1 | NM_028315          | Dis3    | DIS3 mitotic control homolog (S. cerevisiae)    | 99076634  | 99099770  | TC1400002600.mm.1  | -0.4 | 0.005213 |
| TC0200002890.mm.1 | NM_008564          | Mcm2    | minichromosome maintenance deficient 2 mitot    | 88883474  | 88898780  | TC0600002690.mm.1  | -0.8 | 0.005215 |
| TC0200002911.mm.1 | NM_144938          | C1s     | complement component 1, s subcomponent          | 124530344 | 124542359 | TC0600003108.mm.1  | 1.0  | 0.005231 |
| TC0200002912.mm.1 | ENSMUST00000117499 | Gm12261 | predicted gene 12261                            | 59577992  | 59578636  | TC1100002856.mm.1  | -0.6 | 0.005238 |
| TC0200002928.mm.1 | NM_028375          | Cxx1c   | CAAX box 1C                                     | 53607922  | 53609135  | TC0X00000479.mm.1  | 0.5  | 0.005241 |
| TC0200002929.mm.1 | NM_007778          | Csf1    | colony stimulating factor 1 (macrophage)        | 107741048 | 107760469 | TC03000002718.mm.1 | 0.3  | 0.005243 |
| TC0200002937.mm.1 | OTTMUST00000112305 | Rpl31-p | ---                                             | 30160620  | 30160997  | TC1900000454.mm.1  | -0.9 | 0.005246 |
| TC0200002942.mm.1 | ENSMUST00000053876 | G6pd2   | glucose-6-phosphate dehydrogenase 2             | 61808843  | 61810477  | TC0500000580.mm.1  | 0.4  | 0.005251 |
| TC0200002944.mm.1 | NM_025912          | Fam210b | family with sequence similarity 210, member B   | 172345565 | 172355749 | TC0200002666.mm.1  | 0.2  | 0.005283 |
| TC0200002945.mm.1 | ENSMUST00000085163 | Gm10263 | predicted gene 10263                            | 73317844  | 73318143  | TC1300000880.mm.1  | -0.9 | 0.005304 |
| TC0200002950.mm.1 | NM_174847          | C2cd2   | C2 calcium-dependent domain containing 2        | 97855209  | 97922633  | TC1600002158.mm.1  | 0.3  | 0.005305 |
| TC0200002951.mm.1 | NM_008524          | Lum     | lumican                                         | 97565501  | 97572703  | TC1000001190.mm.1  | 0.9  | 0.005313 |
| TC0200002952.mm.1 | NM_013515          | Stom    | stomatin                                        | 35313985  | 35337009  | TC0200003362.mm.1  | 0.9  | 0.005313 |
| TC0200002959.mm.1 | OTTMUST00000051740 | Ac16703 | ---                                             | 84963669  | 84964559  | TC0100000726.mm.1  | 1.1  | 0.005316 |
| TC0200002971.mm.1 | NM_032003          | Enpp5   | ectonucleotide pyrophosphatase/phosphodieste    | 44078813  | 44086567  | TC1700000842.mm.1  | 0.7  | 0.005319 |
| TC0200002982.mm.1 | ENSMUST00000089593 | Gm7551  | predicted gene 7551                             | 65785141  | 65785932  | TC0700000986.mm.1  | -1.1 | 0.00532  |
| TC0200002998.mm.1 | NM_008253          | Hmgb3   | high mobility group box 3                       | 71555918  | 71560676  | TC0X00000652.mm.1  | -0.3 | 0.005344 |
| TC0200003000.mm.1 | XM_001478655       | Gm3934  | predicted gene 3934                             | 192073733 | 192074452 | TC0100003825.mm.1  | 0.5  | 0.005386 |

|                   |                    |         |                                                 |           |           |                   |      |          |
|-------------------|--------------------|---------|-------------------------------------------------|-----------|-----------|-------------------|------|----------|
| TC0200003003.mm.1 | NM_008362          | Il1r1   | interleukin 1 receptor, type I                  | 40225080  | 40316198  | TC0100000295.mm.1 | 0.5  | 0.00539  |
| TC0200003011.mm.1 | NM_009662          | Alox5   | arachidonate 5-lipoxygenase                     | 116410071 | 116461178 | TC0600002975.mm.1 | 0.2  | 0.005404 |
| TC0200003023.mm.1 | NM_178600          | Vkorc1  | vitamin K epoxide reductase complex, subunit 1  | 127893063 | 127895617 | TC0700004665.mm.1 | 0.7  | 0.005427 |
| TC0200003031.mm.1 | ENSMUST00000121971 | Gm12013 | predicted gene 12013                            | 17095490  | 17095644  | TC1100002250.mm.1 | -1.1 | 0.005434 |
| TC0200003051.mm.1 | NM_176963          | Galm    | galactose mutarotase                            | 80127471  | 80185101  | TC1700001209.mm.1 | 0.6  | 0.005436 |
| TC0200003053.mm.1 | NM_013899          | Timm10  | translocase of inner mitochondrial membrane 10  | 84826997  | 84830213  | TC0200001223.mm.1 | 0.2  | 0.005454 |
| TC0200003067.mm.1 | NM_016965          | Nckap1  | NCK-associated protein 1                        | 80500512  | 80581380  | TC0200003837.mm.1 | 0.6  | 0.00547  |
| TC0200003074.mm.1 | ENSMUST00000097040 | Rpl31-p | ribosomal protein L31, pseudogene 17            | 54701329  | 54701706  | TC1200001750.mm.1 | -1.1 | 0.005496 |
| TC0200003089.mm.1 | NM_011952          | Mapk3   | mitogen-activated protein kinase 3              | 126759601 | 126765819 | TC0700001814.mm.1 | 0.5  | 0.005504 |
| TC0200003094.mm.1 | NM_010313          | Gnb5    | guanine nucleotide binding protein (G protein), | 75306288  | 75345923  | TC0900001012.mm.1 | 0.3  | 0.005516 |
| TC0200003107.mm.1 | ENSMUST00000088040 | Pcna-ps | proliferating cell nuclear antigen pseudogene 2 | 9283238   | 9284494   | TC1900000175.mm.1 | -1.5 | 0.005517 |
| TC0200003109.mm.1 | NM_009351          | Tep1    | telomerase associated protein 1                 | 50824061  | 50870560  | TC1400001988.mm.1 | 0.2  | 0.005528 |
| TC0200003113.mm.1 | NM_009916          | Ccr4    | chemokine (C-C motif) receptor 4                | 114490316 | 114496544 | TC0900003169.mm.1 | -0.8 | 0.005547 |
| TC0200003117.mm.1 | NM_011058          | Pdgfra  | platelet derived growth factor receptor, alpha  | 75152291  | 75198204  | TC0500000709.mm.1 | 0.6  | 0.005563 |
| TC0200003124.mm.1 | XM_001479761       | Gm10237 | predicted gene 10237                            | 35892578  | 35920799  | TC1600000499.mm.1 | -0.4 | 0.005565 |
| TC0200003125.mm.1 | NM_019922          | Crtap   | cartilage associated protein                    | 114375131 | 114390712 | TC0900003168.mm.1 | 0.5  | 0.005567 |
| TC0200003126.mm.1 | ENSMUST00000158383 | Gm23859 | predicted gene, 23859                           | 90228899  | 90228962  | TC1800000914.mm.1 | 0.3  | 0.005577 |
| TC0200003127.mm.1 | ENSMUST00000117206 | Gm6964  | predicted gene 6964                             | 85793684  | 85794120  | TC0X00002559.mm.1 | -0.3 | 0.005598 |
| TC0200003135.mm.1 | NM_011766          | Zfpn2   | zinc finger protein, multitype 2                | 40655042  | 41104592  | TC1500000317.mm.1 | 0.2  | 0.005599 |
| TC0200003151.mm.1 | NM_008558          | Max     | Max protein                                     | 76937269  | 76962248  | TC1200001959.mm.1 | -0.5 | 0.005612 |
| TC0200003157.mm.1 | ENSMUST00000092523 | Gm10712 | predicted gene 10712                            | 13332646  | 13333257  | TC0700002368.mm.1 | -1.1 | 0.005616 |
| TC0200003165.mm.1 | NM_001081286       | Fat1    | FAT tumor suppressor homolog 1 (Drosophila)     | 44950208  | 45052257  | TC0800000509.mm.1 | 0.3  | 0.005622 |
| TC0200003182.mm.1 | NM_001081406       | Lrr1    | leucine rich repeat protein 1                   | 69168814  | 69179010  | TC1200000562.mm.1 | -0.3 | 0.005627 |
| TC0200003186.mm.1 | NCBI_Gene:10004241 | Trav7d- | Trav7d-2 T cell receptor alpha variable 7D-2    | 52683964  | 52684472  | TC1400000621.mm.1 | -0.5 | 0.005637 |
| TC0200003190.mm.1 | ENSMUST00000165525 | Gm16494 | predicted gene 16494                            | 47016696  | 47016956  | TC1700002201.mm.1 | -0.9 | 0.005649 |
| TC0200003195.mm.1 | ENSMUST00000120712 | Gm6292  | predicted gene 6292                             | 105140849 | 105141943 | TC0X00001057.mm.1 | -0.3 | 0.00565  |
| TC0200003203.mm.1 | NM_029775          | Dcun1d5 | DCN1, defective in cullin neddylation 1, domain | 7184566   | 7207031   | TC0900000040.mm.1 | -0.6 | 0.005654 |
| TC0200003205.mm.1 | ENSMUST00000177937 | Gm10592 | predicted gene 10592                            | 42083899  | 42084291  | TC0400002490.mm.1 | 0.2  | 0.005657 |
| TC0200003212.mm.1 | ENSMUST00000178742 | Gm10592 | predicted gene 10592                            | 42581229  | 42581621  | TC0400002502.mm.1 | 0.2  | 0.005657 |
| TC0200003219.mm.1 | ENSMUST00000178091 | Gm10592 | predicted gene 10592                            | 91391     | 91783     | TC4_JH584293_rand | 0.2  | 0.005657 |
| TC0200003237.mm.1 | ENSMUST00000145241 | Gm16259 | predicted gene 16259                            | 105292432 | 105292984 | TC1400002657.mm.1 | -0.8 | 0.005661 |
| TC0200003240.mm.1 | NM_025648          | Farsa   | phenylalanyl-tRNA synthetase, alpha subunit     | 84856986  | 84869257  | TC0800000965.mm.1 | -0.2 | 0.005668 |
| TC0200003243.mm.1 | NM_008481          | Lama2   | laminin, alpha 2                                | 26981285  | 27616942  | TC1000001919.mm.1 | 0.7  | 0.005669 |
| TC0200003259.mm.1 | XR_140976          | Gm20262 | predicted gene, 20262                           | 28872867  | 28877213  | TC1000000259.mm.1 | -0.9 | 0.0057   |
| TC0200003262.mm.1 | NM_024406          | Fabp4   | fatty acid binding protein 4, adipocyte         | 10204328  | 10208576  | TC0300001639.mm.1 | 1.9  | 0.005709 |
| TC0200003264.mm.1 | ENSMUST00000177744 | Gm9048  | predicted gene 9048                             | 118347435 | 118348679 | TC1800002989.mm.1 | -0.4 | 0.005722 |
| TC0200003267.mm.1 | NM_030026          | Mccc2   | methylcrotonoyl-Coenzyme A carboxylase 2 (bet   | 99948532  | 100015639 | TC1300002526.mm.1 | 0.5  | 0.00574  |
| TC0200003270.mm.1 | ENSMUST00000158586 | Gm23387 | predicted gene, 23387                           | 45486224  | 45486330  | TC1300001910.mm.1 | 0.4  | 0.005763 |
| TC0200003272.mm.1 | NM_011029          | Rpsa    | ribosomal protein SA                            | 120127766 | 120132369 | TC0900001595.mm.1 | -0.5 | 0.005786 |
| TC0200003279.mm.1 | NM_153131          | Unc5a   | unc-5 homolog A (C. elegans)                    | 54949411  | 55006018  | TC1300000643.mm.1 | 0.3  | 0.005799 |
| TC0200003306.mm.1 | NM_172838          | Slc16a1 | solute carrier family 16 (monocarboxylic acid t | 34668403  | 34747289  | TC1900001425.mm.1 | 0.7  | 0.0058   |
| TC0200003313.mm.1 | NM_029100          | Sepn1   | selenoprotein N, 1                              | 134537892 | 134552166 | TC0400003741.mm.1 | 0.4  | 0.005807 |
| TC0200003322.mm.1 | ENSMUST00000121691 | Rpsa-ps | ribosomal protein S4, pseudogene 4              | 33038816  | 33039703  | TC1100002483.mm.1 | -0.6 | 0.005835 |
| TC0200003325.mm.1 | ENSMUST00000119765 | Gm9431  | predicted gene 9431                             | 9009027   | 9010077   | TC0X00001818.mm.1 | -0.9 | 0.005856 |
| TC0200003326.mm.1 | NM_008829          | Pgr     | progesterone receptor                           | 88989833  | 8968611   | TC0900000069.mm.1 | -0.2 | 0.005859 |
| TC0200003327.mm.1 | NM_009775          | Tspo    | translocator protein                            | 83563573  | 83574203  | TC1500000776.mm.1 | 0.6  | 0.005874 |
| TC0200003330.mm.1 | NM_013733          | Chaf1a  | chromatin assembly factor 1, subunit A (p150)   | 56040416  | 56070276  | TC1700000997.mm.1 | -0.3 | 0.005889 |
| TC0200003346.mm.1 | NM_007817          | Cyp2f2  | cytochrome P450, family 2, subfamily f, polypep | 27119909  | 27133660  | TC0700000447.mm.1 | 0.8  | 0.00589  |
| TC0200003350.mm.1 | NM_198645          | Ccdc58  | coiled-coil domain containing 58                | 36071660  | 36092118  | TC1600000503.mm.1 | -0.4 | 0.005896 |
| TC0200003353.mm.1 | NM_001004164       | Gnptab  | N-acetylglucosamine-1-phosphate transferase, a  | 88379132  | 88447329  | TC1000001079.mm.1 | 0.6  | 0.005902 |
| TC0200003356.mm.1 | ENSMUST00000119646 | Gm13245 | predicted gene 13245                            | 146480667 | 146480926 | TC0400001886.mm.1 | -0.4 | 0.005903 |
| TC0200003362.mm.1 | NM_025959          | Psmc6   | proteasome (prosome, macropain) 26S subunit,    | 45329824  | 45349071  | TC1400000485.mm.1 | -0.5 | 0.005933 |
| TC0200003368.mm.1 | NCBI_Gene:10010149 | Trav15d | T cell receptor alpha variable 15D-2-DV6D-2     | 52956818  | 52958177  | TC1400002803.mm.1 | -0.2 | 0.005946 |
| TC0200003369.mm.1 | NM_008521          | Ltc4s   | leukotriene C4 synthase                         | 50236469  | 50238616  | TC1100002666.mm.1 | 0.8  | 0.005949 |
| TC0200003376.mm.1 | NM_134005          | Enpp3   | ectonucleotide pyrophosphatase/phosphodiester   | 24773814  | 24836195  | TC1000001895.mm.1 | 0.4  | 0.005966 |
| TC0200003384.mm.1 | NM_027497          | Epc1    | enhancer of polycomb homolog 1 (Drosophila)     | 6435951   | 6516108   | TC1800000950.mm.1 | -0.3 | 0.005968 |
| TC0200003399.mm.1 | ENSMUST00000086236 | Gm10180 | predicted gene 10180                            | 25101404  | 25101481  | TC0900001926.mm.1 | -0.8 | 0.005969 |
| TC0200003405.mm.1 | ENSMUST00000178135 | Gm3699  | predicted gene 3699                             | 43456424  | 43456501  | TC1000002084.mm.1 | -0.8 | 0.005969 |
| TC0200003421.mm.1 | ENSMUST00000122438 | Gm11204 | predicted gene 11204                            | 79905981  | 79906127  | TC1100001192.mm.1 | -1.2 | 0.005986 |
| TC0200003422.mm.1 | NM_029482          | 4930579 | RIKEN cDNA 4930579G24 gene                      | 79629079  | 79632820  | TC0400000624.mm.1 | -0.3 | 0.005995 |
| TC0200003440.mm.1 | NM_153563          | Strip1  | striatin interacting protein 1                  | 107612532 | 107631710 | TC0300002714.mm.1 | -0.4 | 0.006002 |
| TC0200003455.mm.1 | NM_133221          | Slc24a6 | solute carrier family 24 (sodium/potassium/calc | 120511168 | 120534024 | TC0500001338.mm.1 | 0.2  | 0.006006 |
| TC0200003467.mm.1 | NM_020034          | Hist1h1 | histone cluster 1, H1b                          | 21779883  | 21780625  | TC1300001560.mm.1 | -1.6 | 0.006008 |
| TC0200003484.mm.1 | ENSMUST00000118652 | Rpl22-p | ribosomal protein L22, pseudogene 1             | 8038611   | 8038996   | TC0X00001791.mm.1 | -0.5 | 0.006008 |
| TC0200003486.mm.1 | NM_001081211       | Ptafr   | platelet-activating factor receptor             | 132564067 | 132582683 | TC0400001593.mm.1 | 0.7  | 0.006017 |
| TC0200003496.mm.1 | NM_207161          | Dnph1   | 2-deoxynucleoside 5-phosphate N-hydrolase 1     | 46496789  | 46499618  | TC1700000896.mm.1 | -0.2 | 0.006022 |
| TC0200003503.mm.1 | NM_009976          | Cst3    | cystatin C                                      | 148871722 | 148875692 | TC0200004816.mm.1 | 0.7  | 0.006047 |
| TC0200003505.mm.1 | ENSMUST00000171334 | Gm4938  | predicted pseudogene 4938                       | 104918779 | 104919186 | TC1300001182.mm.1 | -0.5 | 0.006069 |
| TC0200003506.mm.1 | NM_018853          | Rplp1   | ribosomal protein, large, P1                    | 61913283  | 61914538  | TC0900002450.mm.1 | -0.8 | 0.006095 |
| TC0200003512.mm.1 | ENSMUST00000118252 | Gm5687  | predicted gene 5687                             | 12899427  | 12899066  | TC1800000109.mm.1 | -0.9 | 0.006112 |
| TC0200003518.mm.1 | ENSMUST00000066378 | Gm6457  | predicted pseudogene 6457                       | 14570101  | 14570915  | TC1800000121.mm.1 | -0.5 | 0.006114 |
| TC0200003524.mm.1 | NR_037281          | Mir3098 | microRNA 3098                                   | 131142469 | 131604824 | TC0200004648.mm.1 | 0.9  | 0.006116 |
| TC0200003548.mm.1 | ENSMUST00000122061 | Gm14138 | predicted gene 14138                            | 119187517 | 119188261 | TC0200001763.mm.1 | -0.7 | 0.006121 |
| TC0200003549.mm.1 | ENSMUST00000071172 | Gm5619  | predicted gene 5619                             | 85781863  | 85782663  | TC0900000274.mm.1 | -0.9 | 0.006132 |
| TC0200003554.mm.1 | ENSMUST00000143596 | Rpl31-p | ribosomal protein L31, pseudogene 14            | 66948563  | 66948940  | TC0100002498.mm.1 | -1.2 | 0.006149 |
| TC0200003563.mm.1 | NM_008760          | Ogn     | osteoglycin                                     | 49608071  | 49624500  | TC1300000569.mm.1 | 1.8  | 0.006152 |
| TC0200003569.mm.1 | ENSMUST00000117403 | Gm14513 | predicted gene 14513                            | 11684002  | 11684124  | TC0X00001849.mm.1 | -0.4 | 0.006159 |
| TC0200003576.mm.1 | NM_008037          | Fosl2   | fos-like antigen 2                              | 32136472  | 32157840  | TC0500000334.mm.1 | 0.2  | 0.006168 |

|                   |                    |         |                                                 |           |           |                   |      |          |
|-------------------|--------------------|---------|-------------------------------------------------|-----------|-----------|-------------------|------|----------|
| TC0200003579.mm.1 | ENSMUST00000177762 | Gm9040  | predicted gene 9040                             | 118325725 | 118326969 | TC1000002985.mm.1 | -0.5 | 0.006172 |
| TC0200003589.mm.1 | ENSMUST00000179851 | Gm9044  | predicted gene 9044                             | 118331164 | 118332408 | TC1000002986.mm.1 | -0.5 | 0.006172 |
| TC0200003597.mm.1 | ENSMUST00000121859 | Gm13935 | predicted gene 13935                            | 110418170 | 110419619 | TC0200004310.mm.1 | -0.5 | 0.006175 |
| TC0200003599.mm.1 | NM_001109991       | Col18a1 | collagen, type XVIII, alpha 1                   | 77052178  | 77166548  | TC1000002418.mm.1 | 0.2  | 0.006179 |
| TC0200003601.mm.1 | NM_001252096       | Mettl20 | methyltransferase like 20                       | 149139849 | 149151171 | TC0600001768.mm.1 | 0.2  | 0.006185 |
| TC0200003603.mm.1 | NM_011701          | Vim     | vimentin                                        | 13573927  | 13582826  | TC0200000240.mm.1 | 1.1  | 0.006203 |
| TC0200003616.mm.1 | ENSMUST00000117277 | Gm11488 | predicted gene 11488                            | 73497615  | 73498477  | TC0400002860.mm.1 | -1.2 | 0.006204 |
| TC0200003621.mm.1 | NM_207523          | Rpl23a  | ribosomal protein L23A                          | 78180932  | 78183584  | TC1100003288.mm.1 | -0.5 | 0.006227 |
| TC0200003640.mm.1 | ENSMUST00000180284 | Gm7488  | predicted gene 7488                             | 21049445  | 21050525  | TC0300000142.mm.1 | -0.4 | 0.006231 |
| TC0200003653.mm.1 | ENSMUST00000120413 | Gm11605 | predicted gene 11605                            | 63364720  | 63365365  | TC0100002453.mm.1 | -0.6 | 0.006239 |
| TC0200003670.mm.1 | NM_178197          | Hist1h2 | histone cluster 1, H2bh                         | 23542922  | 23543444  | TC1300001630.mm.1 | -0.7 | 0.00624  |
| TC0200003674.mm.1 | ENSMUST00000121462 | Rpsa-ps | ribosomal protein SA, pseudogene 5              | 28956724  | 28957608  | TC1100000285.mm.1 | -0.3 | 0.006258 |
| TC0200003682.mm.1 | NM_001122596       | A630033 | RIKEN cDNA A630033H20 gene                      | 107148927 | 107173661 | TC0X00001084.mm.1 | -0.5 | 0.006269 |
| TC0200003688.mm.1 | NM_011716          | Wfs1    | Wolfram syndrome 1 homolog (human)              | 36966104  | 36988982  | TC0500002268.mm.1 | 0.3  | 0.006275 |
| TC0200003710.mm.1 | NM_001290128       | Rbm14-r | Rbm14-Rbm4 readthrough (Rbm14-rbm4), trans      | 0         | 0         | TSUnmapped0000002 | -0.8 | 0.006291 |
| TC0200003724.mm.1 | NM_177263          | Zhx3    | zinc fingers and homeoboxes 3                   | 160765734 | 160872990 | TC0200005514.mm.1 | 0.3  | 0.006293 |
| TC0200003740.mm.1 | NM_022984          | Retn    | resistin                                        | 3655770   | 3660110   | TC0800000019.mm.1 | 2.3  | 0.006294 |
| TC0200003746.mm.1 | ENSMUST00000177657 | Rpl7a-p | ribosomal protein L7A, pseudogene 10            | 97179179  | 97179979  | TC0900001223.mm.1 | -0.9 | 0.00631  |
| TC0200003747.mm.1 | NCBI_Gene:110315:p | Trbv26  | T cell receptor beta, variable 26               | 41227525  | 41227993  | TC0600003495.mm.1 | -1.2 | 0.006315 |
| TC0200003749.mm.1 | NM_178207          | Hist1h3 | histone cluster 1, H3i                          | 21782915  | 21783397  | TC1300001561.mm.1 | -0.8 | 0.006334 |
| TC0200003752.mm.1 | ENSMUST00000057740 | Rpsa-ps | ribosomal protein SA, pseudogene 10             | 150072590 | 150073620 | TC0300003128.mm.1 | -0.9 | 0.006341 |
| TC0200003759.mm.1 | NM_008409          | Iitm2a  | integral membrane protein 2A                    | 107397099 | 107403376 | TC0X00002845.mm.1 | -1.3 | 0.00636  |
| TC0200003767.mm.1 | ENSMUST00000117768 | Gm12025 | predicted gene 12025                            | 19360926  | 19361069  | TC1100002278.mm.1 | -0.5 | 0.006365 |
| TC0200003773.mm.1 | NM_001039723       | Tmem120 | transmembrane protein 120B                      | 123068415 | 123117749 | TC0500001408.mm.1 | 0.5  | 0.006368 |
| TC0200003782.mm.1 | NM_019482          | Panx1   | pannexin 1                                      | 15005161  | 15045478  | TC0900001781.mm.1 | -0.3 | 0.006375 |
| TC0200003805.mm.1 | ENSMUST00000117147 | Gm12460 | predicted gene 12460                            | 51190107  | 51190463  | TC0400000558.mm.1 | -0.6 | 0.006388 |
| TC0200003820.mm.1 | XM_484272          | Gm5451  | predicted gene 5451                             | 66874081  | 66874659  | TC1300000813.mm.1 | -0.9 | 0.006394 |
| TC0200003822.mm.1 | ENSMUST00000184633 | RP24-57 | N/A                                             | 36813133  | 36813874  | TC0900002039.mm.1 | -0.9 | 0.006402 |
| TC0200003826.mm.1 | ENSMUST00000184135 | RP23-16 | N/A                                             | 71908843  | 71909551  | TC0900000951.mm.1 | -0.5 | 0.006408 |
| TC0200003830.mm.1 | NM_172435          | P2ry10  | purinergic receptor P2Y, G-protein coupled 10   | 107088492 | 107104974 | TC0X00001083.mm.1 | -0.8 | 0.006412 |
| TC0200003837.mm.1 | NM_001177513       | Gm7102  | predicted gene 7102                             | 61174686  | 61176309  | TC1900001760.mm.1 | -0.3 | 0.006414 |
| TC0200003841.mm.1 | NCBI_Gene:10012646 | Trav13n | T cell receptor alpha variable 13N-4            | 53362368  | 53364107  | TC1400000689.mm.1 | -0.5 | 0.006415 |
| TC0200003842.mm.1 | NM_027179          | Tecr    | trans-2,3-enoyl-CoA reductase                   | 83571698  | 83594491  | TC0800002553.mm.1 | 0.6  | 0.006437 |
| TC0200003844.mm.1 | NM_001290127       | Rbm14-r | Rbm14-Rbm4 readthrough (Rbm14-rbm4), trans      | 0         | 0         | TSUnmapped0000002 | -0.8 | 0.006445 |
| TC0200003847.mm.1 | NM_001039214       | Mex3c   | mex3 homolog C (C. elegans)                     | 73572705  | 73592578  | TC1800000771.mm.1 | -0.3 | 0.006481 |
| TC0200003848.mm.1 | NCBI_Gene:547424:p | Trav15n | T cell receptor alpha variable 15N-2            | 53267953  | 53269312  | TC1400002821.mm.1 | -0.2 | 0.006488 |
| TC0200003851.mm.1 | ENSMUST00000121456 | Gm14165 | predicted gene 14165                            | 152353615 | 152354566 | TC0200002281.mm.1 | -1.0 | 0.006495 |
| TC0200003854.mm.1 | NM_178187          | Hist1h2 | histone cluster 1, H2ae                         | 23570517  | 23571220  | TC1300001634.mm.1 | -0.4 | 0.006521 |
| TC0200003855.mm.1 | NM_013553          | Hoxc4   | homeobox C4                                     | 103018936 | 103036852 | TC1500001123.mm.1 | 0.2  | 0.006523 |
| TC0200003876.mm.1 | NM_001159529       | Cox7a2l | cytochrome c oxidase subunit VIIa polypeptide 2 | 83501917  | 83514333  | TC1700002629.mm.1 | -0.4 | 0.006542 |
| TC0200003879.mm.1 | NM_001033228       | Iltga1  | integrin alpha 1                                | 114958079 | 115101964 | TC1300002717.mm.1 | 0.8  | 0.006568 |
| TC0200003907.mm.1 | NM_020567          | Gmnn    | geminin                                         | 24751845  | 24761937  | TC1300001666.mm.1 | -0.3 | 0.006578 |
| TC0200003909.mm.1 | NM_153535          | Fam149a | family with sequence similarity 149, member A   | 45336715  | 45382291  | TC0800002145.mm.1 | 0.5  | 0.006596 |
| TC0200003913.mm.1 | NM_009296          | Supt4a  | suppressor of Ty 4A                             | 87737527  | 87743623  | TC1100001349.mm.1 | -0.5 | 0.006598 |
| TC0200003928.mm.1 | ENSMUST00000117940 | Hmgbl-r | high mobility group box 1, related sequence 18  | 67518306  | 67518932  | TC0400002832.mm.1 | -0.5 | 0.006605 |
| TC0200003930.mm.1 | NCBI_Gene:10004247 | Trav4d- | T cell receptor alpha variable 4D-3             | 52899969  | 52900470  | TC1400000641.mm.1 | -0.7 | 0.006615 |
| TC0200003935.mm.1 | ENSMUST00000141391 | Gm11281 | predicted gene 11281                            | 21953053  | 21953628  | TC1300001570.mm.1 | -0.5 | 0.006622 |
| TC0200003942.mm.1 | NM_010476          | Hsd17b7 | hydroxysteroid (17-beta) dehydrogenase 7        | 169949535 | 169969241 | TC0100003505.mm.1 | 0.3  | 0.006639 |
| TC0200003957.mm.1 | NM_025932          | Syp1    | synapse associated protein 1                    | 162856843 | 162888462 | TC0X00003313.mm.1 | 0.8  | 0.006659 |
| TC0200003966.mm.1 | NM_007452          | Prdx3   | peroxiredoxin 3                                 | 60864051  | 60874556  | TC1900001754.mm.1 | 0.5  | 0.006673 |
| TC0200003977.mm.1 | NM_145442          | Mbip    | MAP3K12 binding inhibitory protein 1            | 56328306  | 56345894  | TC1400001785.mm.1 | -0.3 | 0.006685 |
| TC0200003985.mm.1 | NM_007823          | Cyp4b1  | cytochrome P450, family 4, subfamily b, polypep | 115624725 | 115647709 | TC0400003321.mm.1 | 0.9  | 0.006704 |
| TC0200004006.mm.1 | ENSMUST00000180583 | Gm13679 | predicted gene 13679                            | 83390129  | 83390612  | TC0200001196.mm.1 | -0.3 | 0.006723 |
| TC0200004015.mm.1 | NM_011057          | Pdgfb   | platelet derived growth factor, B polypeptide   | 79995874  | 80014808  | TC1500001891.mm.1 | 0.3  | 0.006739 |
| TC0200004026.mm.1 | NM_134122          | Nrm     | nurim (nuclear envelope membrane protein)       | 35861318  | 35865402  | TC1700000706.mm.1 | -0.4 | 0.006742 |
| TC0200004029.mm.1 | NM_019686          | Cib2    | calcium and integrin binding family member 2    | 54544794  | 54560218  | TC0900002321.mm.1 | 0.9  | 0.006748 |
| TC0200004037.mm.1 | ENSMUST00000140507 | Rpl9-ps | ribosomal protein L9, pseudogene 7              | 70458982  | 70459560  | TC0200001020.mm.1 | -0.7 | 0.006754 |
| TC0200004039.mm.1 | NM_010193          | Fem1b   | feminization 1 homolog b (C. elegans)           | 62791821  | 62811648  | TC0900002465.mm.1 | -0.3 | 0.006758 |
| TC0200004040.mm.1 | NM_028787          | Slc35f5 | solute carrier family 35, member F5             | 125561016 | 125595817 | TC0100001111.mm.1 | 0.4  | 0.006763 |
| TC0200004054.mm.1 | ENSMUST00000161190 | Rpl18a- | ribosomal protein L18A, pseudogene 1            | 55395707  | 55396229  | TC1200001765.mm.1 | -0.7 | 0.006773 |
| TC0200004063.mm.1 | XR_032609          | Gm17014 | predicted gene 17014                            | 78845162  | 78845784  | TC0200003822.mm.1 | -0.5 | 0.006783 |
| TC0200004070.mm.1 | NM_001205181       | Abhd4   | abhydrolase domain containing 4                 | 54254129  | 54269169  | TC1400000742.mm.1 | 0.5  | 0.006785 |
| TC0200004080.mm.1 | NM_010689          | Lat     | linker for activation of T cells                | 126363827 | 126369543 | TC0700004273.mm.1 | -1.2 | 0.00683  |
| TC0200004082.mm.1 | NCBI_Gene:269846:p | Trbv31  | T cell receptor beta, variable 31               | 41557691  | 41558371  | TC0600002157.mm.1 | -1.5 | 0.006832 |
| TC0200004086.mm.1 | NM_001102607       | Col6a6  | collagen, type VI, alpha 6                      | 105689417 | 105828085 | TC0900002997.mm.1 | 0.3  | 0.006864 |
| TC0200004099.mm.1 | NCBI_Gene:10012467 | Trbv13- | T cell receptor beta, variable 13-3             | 41130147  | 41140170  | TC0600000425.mm.1 | -1.0 | 0.006881 |
| TC0200004111.mm.1 | NM_175656          | Hist1h4 | histone cluster 1, H4i                          | 22040636  | 22041362  | TC1300001575.mm.1 | -0.5 | 0.006887 |
| TC0200004118.mm.1 | NM_001161371       | Ss18    | synovial sarcoma translocation, Chromosome 18   | 14624198  | 14682914  | TC1800001009.mm.1 | -0.2 | 0.006907 |
| TC0200004121.mm.1 | NM_001014996       | Centpj  | centromere protein J                            | 56526761  | 56571846  | TC1400002122.mm.1 | -0.3 | 0.006921 |
| TC0200004127.mm.1 | ENSMUST00000060997 | Gm9791  | predicted pseudogene 9791                       | 34004779  | 34005511  | TC0300001820.mm.1 | 0.7  | 0.006922 |
| TC0200004129.mm.1 | NM_001276413       | Fn1     | fibronectin 1                                   | 71585473  | 71653234  | TC0100002544.mm.1 | 1.3  | 0.006931 |
| TC0200004133.mm.1 | NM_001166064       | Syde2   | synapse defective 1, Rho GTPase, homolog 2 (C.  | 145987870 | 146021720 | TC0300001486.mm.1 | 0.2  | 0.006948 |
| TC0200004141.mm.1 | ENSMUST00000145247 | Gm6286  | predicted gene 6286                             | 166945597 | 166946358 | TC0100003474.mm.1 | -0.9 | 0.006978 |
| TC0200004173.mm.1 | NM_011065          | Per1    | period circadian clock 1                        | 69095217  | 69109960  | TC1100000900.mm.1 | 0.3  | 0.006983 |
| TC0200004179.mm.1 | NM_007798          | Ctsb    | cathepsin B                                     | 63122462  | 63145923  | TC1400000895.mm.1 | 1.1  | 0.006992 |
| TC0200004184.mm.1 | NR_024139          | Prmt6   | protein arginine N-methyltransferase 6          | 110246104 | 110250999 | TC0300002770.mm.1 | -0.3 | 0.007003 |
| TC0200004188.mm.1 | NM_001042421       | Kntc1   | kinetochore associated 1                        | 123749726 | 123821593 | TC0500001428.mm.1 | -0.5 | 0.007006 |
| TC0200004194.mm.1 | ENSMUST00000075251 | Gm5582  | predicted gene 5582                             | 131253528 | 131254049 | TC0600003265.mm.1 | 0.8  | 0.007006 |

|                   |                    |         |                                                 |           |           |                    |      |          |
|-------------------|--------------------|---------|-------------------------------------------------|-----------|-----------|--------------------|------|----------|
| TC0200004195.mm.1 | NM_010271          | Gpd1    | glycerol-3-phosphate dehydrogenase 1 (soluble)  | 99717515  | 99725008  | TC1500001023.mm.1  | 1.8  | 0.007033 |
| TC0200004196.mm.1 | NCBI_Gene:386446:p | Trav15- | Trav15-1-dv6-1 T cell receptor alpha variable 1 | 53559676  | 53560247  | TC1400002830.mm.1  | -0.4 | 0.00704  |
| TC0200004200.mm.1 | NM_001142706       | Cfb     | complement factor B                             | 34856374  | 34862518  | TC1700002816.mm.1  | 0.8  | 0.007051 |
| TC0200004219.mm.1 | NCBI_Gene:10012467 | Trbv15  | T cell receptor beta, variable 15               | 41141188  | 41141662  | TC0600000427.mm.1  | -1.4 | 0.007066 |
| TC0200004227.mm.1 | NCBI_Gene:10012467 | Trbv12- | T cell receptor beta, variable 12-1             | 41113550  | 41114067  | TC0600000423.mm.1  | -1.4 | 0.007071 |
| TC0200004232.mm.1 | ENSMUST00000076708 | Rps16-p | ribosomal protein S16, pseudogene 2             | 129128020 | 129128571 | TC05000003300.mm.1 | -0.6 | 0.007075 |
| TC0200004236.mm.1 | XR_106474          | Gm19576 | predicted gene, 19576                           | 107984500 | 107989016 | TC1200002343.mm.1  | -0.6 | 0.00708  |
| TC0200004251.mm.1 | NM_144552          | Stxbp6  | syntaxin binding protein 6 (amisyn)             | 44852486  | 45074493  | TC1200001686.mm.1  | 0.2  | 0.007088 |
| TC0200004253.mm.1 | NCBI_Gene:10012524 | Trbd1   | T cell receptor beta, D region 1                | 41533106  | 41548352  | TC0600003496.mm.1  | -1.5 | 0.007104 |
| TC0200004264.mm.1 | ENSMUST00000121308 | Gm5931  | predicted pseudogene 5931                       | 10660522  | 10660998  | TC0X00000129.mm.1  | -0.8 | 0.007125 |
| TC0200004266.mm.1 | NM_010098          | Opn3    | opsin 3                                         | 175662421 | 175692776 | TC0100003611.mm.1  | 0.3  | 0.007131 |
| TC0200004287.mm.1 | ENSMUST00000102283 | Gm22582 | predicted gene, 22582                           | 92587214  | 92587307  | TC1000001119.mm.1  | -0.5 | 0.007133 |
| TC0200004288.mm.1 | NM_010772          | Maz     | MYC-associated zinc finger protein (purine-bind | 127022134 | 127027019 | TC0700004309.mm.1  | -0.4 | 0.007178 |
| TC0200004295.mm.1 | ENSMUST00000078729 | Gm20900 | predicted gene, 20900                           | 120304194 | 120304655 | TC1300002760.mm.1  | -0.8 | 0.007183 |
| TC0200004296.mm.1 | NM_011812          | Fbln5   | fibulin 5                                       | 101746565 | 101819119 | TC1200002242.mm.1  | 0.9  | 0.007202 |
| TC0200004297.mm.1 | ENSMUST00000183380 | RP23-29 | N/A                                             | 72292542  | 72293340  | TC0900002635.mm.1  | -0.9 | 0.007208 |
| TC0200004298.mm.1 | NM_009120          | Sar1a   | SAR1 gene homolog A (S. cerevisiae)             | 61680310  | 61693297  | TC1000000572.mm.1  | 0.6  | 0.007208 |
| TC0200004307.mm.1 | NM_138596          | Med10   | mediator of RNA polymerase II transcription, su | 69809882  | 69816100  | TC1300000857.mm.1  | -0.4 | 0.007218 |
| TC0200004310.mm.1 | NM_145532          | Mall    | mal, T cell differentiation protein-like        | 127704386 | 127729932 | TC0200004564.mm.1  | 0.2  | 0.007251 |
| TC0200004321.mm.1 | NM_025447          | Dimt1   | DIM1 dimethyladenosine transferase 1-like (S. c | 106947129 | 106960224 | TC1300001190.mm.1  | -0.3 | 0.007261 |
| TC0200004325.mm.1 | NM_001177438       | Aldh3b2 | aldehyde dehydrogenase 3 family, member B2      | 3972328   | 3981665   | TC1900000021.mm.1  | 0.6  | 0.007264 |
| TC0200004330.mm.1 | NCBI_Gene:10012465 | Trbv2   | T cell receptor beta, variable 2                | 41047340  | 41047795  | TC0600000419.mm.1  | -1.3 | 0.007265 |
| TC0200004332.mm.1 | NM_026602          | Bcas2   | breast carcinoma amplified sequence 2           | 103171655 | 103179166 | TC0300001047.mm.1  | -0.2 | 0.00727  |
| TC0200004342.mm.1 | NR_045710          | Gm9833  | myelin basic protein expression factor 2, repre | 10088173  | 10092564  | TC0300000062.mm.1  | -0.3 | 0.007276 |
| TC0200004352.mm.1 | NCBI_Gene:213480:p | Trav7-6 | T cell receptor alpha variable 7-6              | 53716716  | 53717291  | TC1400000707.mm.1  | -0.4 | 0.00728  |
| TC0200004354.mm.1 | NM_001110162       | Cdca2   | cell division cycle associated 2                | 67676331  | 67715841  | TC1400002290.mm.1  | -0.4 | 0.007294 |
| TC0200004369.mm.1 | ENSMUST00000119165 | Gm14335 | predicted gene 14335                            | 115638250 | 115639059 | TC0600002956.mm.1  | -0.4 | 0.007295 |
| TC0200004388.mm.1 | NCBI_Gene:668589:p | Ighv1-8 | immunoglobulin heavy variable 1-80              | 115912344 | 115912776 | TC1200002659.mm.1  | -1.5 | 0.007306 |
| TC0200004393.mm.1 | NM_019674          | Ppp4c   | protein phosphatase 4, catalytic subunit        | 126785868 | 126792471 | TC0700004295.mm.1  | -0.6 | 0.007306 |
| TC0200004396.mm.1 | NM_198606          | Dcaf13  | DDB1 and CUL4 associated factor 13              | 39112874  | 39146856  | TC1500000301.mm.1  | -0.4 | 0.007313 |
| TC0200004405.mm.1 | NM_183170          | Mpv17l2 | MPV17 mitochondrial membrane protein-like 2     | 70758649  | 70760922  | TC0800002402.mm.1  | 0.3  | 0.00732  |
| TC0200004406.mm.1 | NM_001290180       | Nudt7   | nudix (nucleoside diphosphate linked moiety X)- | 0         | 0         | TSUnmapped0000001  | 0.6  | 0.007326 |
| TC0200004407.mm.1 | ENSMUST00000178807 | Gm4479  | predicted gene 4479                             | 56787517  | 56787687  | TC1400002131.mm.1  | -0.6 | 0.007329 |
| TC0200004422.mm.1 | NM_008706          | Nqo1    | NAD(P)H dehydrogenase, quinone 1                | 107388225 | 107403206 | TC0800002877.mm.1  | -0.5 | 0.007376 |
| TC0200004444.mm.1 | ENSMUST00000183480 | AL92896 | N/A                                             | 87256795  | 87256904  | TC0200003977.mm.1  | 0.3  | 0.007384 |
| TC0200004445.mm.1 | XR_105781          | Gm6030  | predicted gene 6030                             | 45200198  | 45216850  | TC1600000673.mm.1  | -0.2 | 0.007392 |
| TC0200004448.mm.1 | ENSMUST00000182963 | Gm9135  | predicted gene 9135                             | 32171714  | 32172703  | TC0700000595.mm.1  | 0.1  | 0.007397 |
| TC0200004450.mm.1 | ENSMUST00000117680 | Gm14733 | predicted gene 14733                            | 80932816  | 80932948  | TC0X00002536.mm.1  | -0.3 | 0.007408 |
| TC0200004466.mm.1 | NM_181796          | Gstp2   | glutathione S-transferase, pi 2                 | 4040285   | 4042221   | TC1900000897.mm.1  | 0.4  | 0.007456 |
| TC0200004480.mm.1 | ENSMUST00000179487 | AC13310 | N/A                                             | 113868    | 114758    | TC1_GL456211_rand  | 0.9  | 0.007499 |
| TC0200004481.mm.1 | NR_029959          | Mir365- | microRNA 365-2                                  | 79726400  | 79726511  | TC1100001189.mm.1  | 0.3  | 0.007507 |
| TC0200004485.mm.1 | ENSMUST00000104377 | Gm23201 | predicted gene, 23201                           | 167064998 | 167065086 | TC0200002581.mm.1  | -1.5 | 0.007513 |
| TC0200004490.mm.1 | NM_010687          | Large   | like-glycosyltransferase                        | 72814599  | 73353540  | TC0800002471.mm.1  | 0.5  | 0.007522 |
| TC0200004491.mm.1 | ENSMUST00000119471 | Gm12856 | predicted gene 12856                            | 118942060 | 118943352 | TC0400003408.mm.1  | -0.5 | 0.007532 |
| TC0200004492.mm.1 | ENSMUST00000120248 | Gm8401  | predicted gene 8401                             | 70517777  | 70519515  | TC0X00000633.mm.1  | -0.5 | 0.007536 |
| TC0200004502.mm.1 | ENSMUST00000117910 | Gm13176 | predicted gene 13176                            | 4834136   | 4834612   | TC0200002864.mm.1  | -0.5 | 0.007556 |
| TC0200004507.mm.1 | ENSMUST00000117711 | Gm11892 | predicted gene 11892                            | 24238100  | 24239301  | TC0400000205.mm.1  | -0.5 | 0.007569 |
| TC0200004512.mm.1 | NM_172663          | Epc2    | enhancer of polycomb homolog 2 (Drosophila)     | 49451486  | 49551948  | TC0200000798.mm.1  | -0.4 | 0.007587 |
| TC0200004534.mm.1 | NM_009447          | Tuba4a  | tubulin, alpha 4A                               | 75214974  | 75219253  | TC0100002604.mm.1  | -0.6 | 0.007588 |
| TC0200004537.mm.1 | ENSMUST00000112150 | Tpt1-ps | tumor protein, translationally-controlled, pseu | 37696515  | 37697033  | TC0900000372.mm.1  | -0.7 | 0.00761  |
| TC0200004541.mm.1 | XM_891806          | Gm6570  | predicted gene 6570                             | 87679651  | 87679998  | TC0200002289.mm.1  | -0.5 | 0.007624 |
| TC0200004548.mm.1 | ENSMUST00000081565 | Gm12222 | predicted gene 12222                            | 54199430  | 54199692  | TC1100000619.mm.1  | 0.9  | 0.007692 |
| TC0200004556.mm.1 | NM_007658          | Cdc25a  | cell division cycle 25A                         | 109875579 | 109893890 | TC0900001442.mm.1  | -0.5 | 0.007699 |
| TC0200004563.mm.1 | NM_013908          | Fbxw5   | F-box and WD-40 domain protein 5                | 25500750  | 25505471  | TC0200000420.mm.1  | 0.7  | 0.007702 |
| TC0200004564.mm.1 | ENSMUST00000079684 | Gm8394  | predicted gene 8394                             | 85313488  | 85314439  | TC1000001028.mm.1  | -0.4 | 0.007706 |
| TC0200004567.mm.1 | NM_026444          | Cs      | citrate synthase                                | 128337817 | 128362479 | TC1000001599.mm.1  | 0.8  | 0.00771  |
| TC0200004577.mm.1 | NM_010219          | Fkbp4   | FK506 binding protein 4                         | 128429735 | 128438677 | TC0600003205.mm.1  | -0.3 | 0.007735 |
| TC0200004585.mm.1 | OTTMUST00000077070 | AC10488 | ---                                             | 119602170 | 119602625 | TC0800003026.mm.1  | -0.9 | 0.007776 |
| TC0200004599.mm.1 | NM_007486          | Arhgdib | Rho, GDP dissociation inhibitor (GDI) beta      | 136923523 | 136941899 | TC0600003337.mm.1  | -0.7 | 0.007784 |
| TC0200004600.mm.1 | NM_031201          | Tsta3   | tissue specific transplantation antigen P35B    | 75924683  | 75929732  | TC1500001754.mm.1  | -0.3 | 0.007785 |
| TC0200004601.mm.1 | ENSMUST00000095218 | Rpl7a-p | ribosomal protein L7A, pseudogene 5             | 57838427  | 57839233  | TC1700002357.mm.1  | -0.8 | 0.007801 |
| TC0200004603.mm.1 | ENSMUST00000091031 | Gm6361  | predicted gene 6361                             | 31446380  | 31446817  | TC1500001322.mm.1  | -0.9 | 0.007803 |
| TC0200004621.mm.1 | NM_027135          | Sec24d  | Sec24 related gene family, member D (S. cerevis | 123267496 | 123365636 | TC0300001255.mm.1  | 0.3  | 0.007841 |
| TC0200004623.mm.1 | NM_023143          | C1ra    | complement component 1, r subcomponent A        | 124512405 | 124523440 | TC0600001422.mm.1  | 0.6  | 0.007862 |
| TC0200004628.mm.1 | NM_026396          | Brix1   | BRX1, biogenesis of ribosomes, homolog (S. cere | 10474779  | 10485947  | TC1000001202.mm.1  | -0.6 | 0.007867 |
| TC0200004634.mm.1 | ENSMUST00000160167 | Gm15664 | predicted gene 15664                            | 105520460 | 105520643 | TC1000001253.mm.1  | 0.9  | 0.007882 |
| TC0200004647.mm.1 | NM_011196          | Ptger3  | prostaglandin E receptor 3 (subtype EP3)        | 157566892 | 157644758 | TC0300001578.mm.1  | 1.0  | 0.007888 |
| TC0200004648.mm.1 | NCBI_Gene:21507:pr | Trav5-4 | T cell receptor alpha variable 5-4              | 53704007  | 53704514  | TC1400000706.mm.1  | -0.6 | 0.007906 |
| TC0200004672.mm.1 | ENSMUST00000122241 | Gm13182 | predicted gene 13182                            | 3550757   | 3551068   | TC0200000012.mm.1  | -0.3 | 0.007906 |
| TC0200004681.mm.1 | NM_178918          | Utp15   | UTP15, U3 small nucleolar ribonucleoprotein, hc | 98246845  | 98262992  | TC1300002499.mm.1  | -0.3 | 0.007909 |
| TC0200004689.mm.1 | NM_207231          | Arl5c   | ADP-ribosylation factor-like 5C                 | 97989578  | 97996181  | TC1100003663.mm.1  | -0.7 | 0.007938 |
| TC0200004693.mm.1 | NM_010559          | Il6ra   | interleukin 6 receptor, alpha                   | 89869324  | 89913162  | TC0300002357.mm.1  | 0.3  | 0.007945 |
| TC0200004713.mm.1 | NCBI_Gene:434040:p | Igkv8-2 | immunoglobulin kappa variable 8-28              | 70143593  | 70144161  | TC0600003587.mm.1  | -0.6 | 0.007947 |
| TC0200004717.mm.1 | NM_001177544       | Hist1h2 | histone cluster 1, H2ao                         | 21810367  | 21810944  | TC1300000181.mm.1  | -0.7 | 0.007947 |
| TC0200004725.mm.1 | NCBI_Gene:692152:p | Igkv13- | immunoglobulin kappa chain variable 13-84       | 68939602  | 68940067  | TC0600003524.mm.1  | -1.0 | 0.007966 |
| TC0200004727.mm.1 | NM_009870          | Cdk4    | cyclin-dependent kinase 4                       | 127063534 | 127067920 | TC1000001546.mm.1  | -0.6 | 0.007971 |
| TC0200004732.mm.1 | ENSMUST00000085365 | Gm16477 | predicted pseudogene 16477                      | 131614188 | 131614988 | TC0700004401.mm.1  | -1.0 | 0.007981 |
| TC0200004734.mm.1 | NM_011877          | Ptpn21  | protein tyrosine phosphatase, non-receptor type | 98676741  | 98737405  | TC1200002194.mm.1  | 0.2  | 0.008013 |

|                   |                    |         |                                                 |           |           |                    |      |          |
|-------------------|--------------------|---------|-------------------------------------------------|-----------|-----------|--------------------|------|----------|
| TC0200004737.mm.1 | NM_026820          | Ifitm1  | interferon induced transmembrane protein 1      | 140967221 | 140969827 | TC0700002034.mm.1  | 0.1  | 0.008014 |
| TC0200004752.mm.1 | NM_010882          | Ndn     | necdin                                          | 62348277  | 62349928  | TC0700000961.mm.1  | 0.7  | 0.008025 |
| TC0200004757.mm.1 | ENSMUST00000076982 | Gm17728 | predicted gene, 17728                           | 9422060   | 9422458   | TC1700000099.mm.1  | -0.4 | 0.008037 |
| TC0200004758.mm.1 | ENSMUST00000027054 | Gm5045  | predicted gene 5045                             | 59210908  | 59211720  | TC1500000428.mm.1  | -0.6 | 0.008041 |
| TC0200004765.mm.1 | ENSMUST00000119875 | Gm13163 | predicted gene 13163                            | 147194876 | 147195211 | TC0400003983.mm.1  | -0.5 | 0.008049 |
| TC0200004769.mm.1 | NM_175528          | E330009 | RIKEN cDNA E330009J07 gene                      | 40401375  | 40436135  | TC06000002137.mm.1 | -0.2 | 0.008085 |
| TC0200004786.mm.1 | NM_009510          | Ezr     | ezrin                                           | 6738041   | 6782784   | TC1700001390.mm.1  | -0.9 | 0.008099 |
| TC0200004793.mm.1 | ENSMUST00000181606 | Gm1972  | predicted pseudogene 1972                       | 22224280  | 22253819  | TC1000000177.mm.1  | -0.3 | 0.008103 |
| TC0200004797.mm.1 | ENSMUST00000086423 | Kpna2   | karyopherin (importin) alpha 2                  | 89908511  | 89910449  | TC1700002723.mm.1  | -1.2 | 0.008113 |
| TC0200004798.mm.1 | NM_134010          | Nup107  | nucleoporin 107                                 | 117750621 | 117792705 | TC1000002944.mm.1  | -0.5 | 0.008148 |
| TC0200004802.mm.1 | ENSMUST00000120702 | Rpsa-ps | ribosomal protein SA, pseudogene 9              | 28477166  | 28478050  | TC0200000483.mm.1  | -1.0 | 0.008159 |
| TC0200004808.mm.1 | ENSMUST00000119768 | Gm5909  | predicted gene 5909                             | 80110806  | 80112086  | TC0800002526.mm.1  | -0.6 | 0.008163 |
| TC0200004816.mm.1 | NM_015817          | Ppap2c  | phosphatidic acid phosphatase type 2C           | 79526429  | 79533787  | TC1000002467.mm.1  | 0.3  | 0.008175 |
| TC0200004821.mm.1 | NM_008800          | Pde1b   | phosphodiesterase 1B, Ca2+-calmodulin depend    | 103503034 | 103530056 | TC1500001133.mm.1  | 0.2  | 0.008193 |
| TC0200004829.mm.1 | NM_010907          | Nfkbia  | nuclear factor of kappa light polypeptide gene  | 55489409  | 55492647  | TC1200001768.mm.1  | -0.5 | 0.008193 |
| TC0200004835.mm.1 | ENSMUST00000117292 | Gm15516 | predicted gene 15516                            | 45713132  | 45713324  | TC1400001910.mm.1  | -0.6 | 0.0082   |
| TC0200004836.mm.1 | NM_001190466       | Dact1   | dapper homolog 1, antagonist of beta-catenin (x | 71309884  | 71320107  | TC1200000608.mm.1  | 0.3  | 0.008206 |
| TC0200004837.mm.1 | ENSMUST00000122273 | Gm12269 | predicted gene 12269                            | 61130591  | 61131307  | TC1100002903.mm.1  | -0.3 | 0.008243 |
| TC0200004838.mm.1 | ENSMUST00000183478 | Rps13-p | ribosomal protein S13, pseudogene 1             | 87047689  | 87048226  | TC0800001012.mm.1  | -0.9 | 0.008249 |
| TC0200004839.mm.1 | NM_026611          | Rnaset2 | ribonuclease T2B                                | 6978595   | 7087597   | TC1700000069.mm.1  | -0.2 | 0.008251 |
| TC0200004840.mm.1 | ENSMUST00000131442 | Gm15277 | predicted gene 15277                            | 33283741  | 33284031  | TC0X00002023.mm.1  | -0.3 | 0.008257 |
| TC0200004848.mm.1 | NM_016959          | Rps3a1  | ribosomal protein S3A1                          | 86137940  | 86142702  | TC0300000263.mm.1  | -0.6 | 0.008262 |
| TC0200004903.mm.1 | OTTMUST00000112371 | RP23-45 | ---                                             | 35281518  | 35281835  | TC09000002011.mm.1 | -0.7 | 0.008274 |
| TC0200004908.mm.1 | ENSMUST00000108272 | Gm13827 | predicted gene 13827                            | 115053421 | 115053846 | TC0500003085.mm.1  | -0.3 | 0.008307 |
| TC0200004914.mm.1 | NM_177663          | Isg20I2 | interferon stimulated exonuclease gene 20-like  | 87930314  | 87940687  | TC0300000709.mm.1  | -0.5 | 0.008367 |
| TC0200004919.mm.1 | XM_894484          | Gm6613  | predicted gene 6613                             | 84794150  | 84794704  | TC1000002600.mm.1  | -0.7 | 0.008371 |
| TC0200004925.mm.1 | NM_178915          | Tmem179 | transmembrane protein 179                       | 112500184 | 112511169 | TC12000002432.mm.1 | 0.2  | 0.008375 |
| TC0200004932.mm.1 | NM_178183          | Hist1h2 | histone cluster 1, H2ak                         | 21753395  | 21753912  | TC1300001558.mm.1  | -1.9 | 0.008397 |
| TC0200004949.mm.1 | ENSMUST00000165157 | Gm10232 | predicted pseudogene 10232                      | 3043884   | 3044750   | TC1700001346.mm.1  | -0.5 | 0.00842  |
| TC0200004953.mm.1 | ENSMUST00000118285 | Gm13798 | predicted gene 13798                            | 95677717  | 95677855  | TC0200001467.mm.1  | -0.8 | 0.00842  |
| TC0200004956.mm.1 | NM_031403          | Dbr1    | debranching enzyme homolog 1 (S. cerevisiae)    | 99575799  | 99584463  | TC0900001252.mm.1  | -0.2 | 0.008427 |
| TC0200004960.mm.1 | NM_027011          | Krt5    | keratin 5                                       | 101707070 | 101712891 | TC15000002269.mm.1 | -1.3 | 0.008427 |
| TC0200004965.mm.1 | NM_001003948       | Pid1    | phosphotyrosine interaction domain containing   | 84036293  | 84364180  | TC0100002690.mm.1  | 0.2  | 0.008431 |
| TC0200004968.mm.1 | NM_175666          | Hist2h2 | histone cluster 2, H2bb                         | 96269700  | 96279001  | TC0300000935.mm.1  | -1.4 | 0.008441 |
| TC0200004971.mm.1 | NCBI_Gene:10012467 | Trbv13- | T cell receptor beta, variable 13-1             | 41116010  | 41126262  | TC0600003493.mm.1  | -0.8 | 0.008467 |
| TC0200004978.mm.1 | NM_001081354       | MamlD1  | mastermind-like domain containing 1             | 71050256  | 71156056  | TC0X00000643.mm.1  | 0.3  | 0.008475 |
| TC0200004987.mm.1 | NM_173001          | Kdm3a   | lysine (K)-specific demethylase 3A              | 71588970  | 71632917  | TC06000002472.mm.1 | -0.4 | 0.008483 |
| TC0200004991.mm.1 | NM_030239          | Abcg3   | ATP-binding cassette, sub-family G (WHITE), mer | 104935057 | 104982718 | TC0500002893.mm.1  | -0.7 | 0.008504 |
| TC0200004998.mm.1 | NM_175665          | Hist1h2 | histone cluster 1, H2bk                         | 22035821  | 22036345  | TC1300000191.mm.1  | -0.9 | 0.00851  |
| TC0200005002.mm.1 | ENSMUST00000120833 | Gm14414 | predicted gene 14414                            | 177460275 | 177460847 | TC0200002747.mm.1  | -1.1 | 0.008537 |
| TC0200005003.mm.1 | NM_010444          | Nr4a1   | nuclear receptor subfamily 4, group A, member 1 | 101266846 | 101274795 | TC1000001067.mm.1  | -0.5 | 0.008543 |
| TC0200005007.mm.1 | NM_178186          | Hist1h2 | histone cluster 1, H2ag                         | 22042460  | 22042949  | TC1300001576.mm.1  | -1.2 | 0.008544 |
| TC0200005020.mm.1 | NM_177586          | Eif5a2  | eukaryotic translation initiation factor 5A2    | 28781311  | 28798846  | TC0300000181.mm.1  | -0.2 | 0.008549 |
| TC0200005021.mm.1 | NM_009506          | Vegfc   | vascular endothelial growth factor C            | 54077532  | 54186454  | TC0800000587.mm.1  | 0.3  | 0.00856  |
| TC0200005024.mm.1 | NCBI_Gene:667881:p | Igkv6-1 | immunoglobulin kappa variable 6-14              | 70434952  | 70435476  | TC0600003596.mm.1  | -1.3 | 0.008563 |
| TC0200005028.mm.1 | NCBI_Gene:10004328 | Trav3n- | T cell receptor alpha variable 3N-3             | 53283585  | 53284181  | TC1400002822.mm.1  | -0.4 | 0.008564 |
| TC0200005036.mm.1 | NM_013725          | Rps11   | ribosomal protein S11                           | 45122386  | 45124389  | TC0700002990.mm.1  | -0.9 | 0.008568 |
| TC0200005052.mm.1 | NM_145158          | Emilin2 | elastin microfibril interfacer 2                | 71252172  | 71311556  | TC1700002490.mm.1  | 0.3  | 0.008576 |
| TC0200005084.mm.1 | NM_080435          | Adcy4   | adenylate cyclase 4                             | 55769058  | 55784042  | TC1400002102.mm.1  | 0.2  | 0.00858  |
| TC0200005087.mm.1 | NM_018794          | Atp6ap1 | ATPase, H+ transporting, lysosomal accessory pr | 74297097  | 74304721  | TC0X00000708.mm.1  | 0.5  | 0.008591 |
| TC0200005102.mm.1 | NM_013630          | Pkd1    | polycystic kidney disease 1 homolog             | 24549950  | 24596514  | TC1700000344.mm.1  | 0.2  | 0.008599 |
| TC0200005106.mm.1 | NM_027409          | Mospd1  | motile sperm domain containing 1                | 53344598  | 53370502  | TC0X00002238.mm.1  | 0.6  | 0.008612 |
| TC0200005108.mm.1 | NM_172086          | Rpl32   | ribosomal protein L32                           | 115805505 | 115808747 | TC0600002960.mm.1  | -0.8 | 0.00862  |
| TC0200005110.mm.1 | ENSMUST00000073645 | Gm9392  | predicted pseudogene 9392                       | 46820267  | 46822048  | TC0700003043.mm.1  | -0.4 | 0.008687 |
| TC0200005112.mm.1 | NM_028399          | Ccnt2   | cyclin T2                                       | 127774164 | 127808061 | TC1000001124.mm.1  | -0.3 | 0.008698 |
| TC0200005132.mm.1 | ENSMUST00000099328 | Gm6843  | predicted pseudogene 6843                       | 95672991  | 95673451  | TC01000002731.mm.1 | -0.3 | 0.008708 |
| TC0200005139.mm.1 | NM_019685          | Ruvbl1  | RuvB-like protein 1                             | 88465409  | 88497572  | TC0600001033.mm.1  | -0.3 | 0.008737 |
| TC0200005144.mm.1 | NM_001048204       | Zfp455  | zinc finger protein 455                         | 67194506  | 67209298  | TC1300000819.mm.1  | -0.2 | 0.008738 |
| TC0200005146.mm.1 | OTTMUST00000065229 | Rps15a- | ---                                             | 105797287 | 105797743 | TC0500002904.mm.1  | -0.3 | 0.008749 |
| TC0200005151.mm.1 | NM_025509          | Ostc    | oligosaccharyltransferase complex subunit       | 130695917 | 130709444 | TC03000002944.mm.1 | -0.5 | 0.008757 |
| TC0200005158.mm.1 | ENSMUST00000178542 | Gm5973  | predicted gene 5973                             | 40863734  | 40864219  | TC0100002252.mm.1  | -0.3 | 0.0088   |
| TC0200005176.mm.1 | ENSMUST00000118634 | Gm6433  | predicted gene 6433                             | 141267581 | 141268455 | TC0500003521.mm.1  | -0.5 | 0.008807 |
| TC0200005181.mm.1 | NM_172274          | Cc2d2a  | coiled-coil and C2 domain containing 2A         | 43662379  | 43740972  | TC0500000465.mm.1  | 0.2  | 0.008827 |
| TC0200005182.mm.1 | NM_172508          | Dse     | dermatan sulfate epimerase                      | 34151393  | 34207551  | TC1000001995.mm.1  | 0.5  | 0.00883  |
| TC0200005185.mm.1 | NM_001003919       | Ddx11   | DEAD/H (Asp-Glu-Ala-Asp/His) box helicase 11    | 66123520  | 66152168  | TC1700001084.mm.1  | -0.2 | 0.008833 |
| TC0200005194.mm.1 | ENSMUST00000161498 | Gm16303 | predicted gene 16303                            | 125739406 | 125739795 | TC0600001464.mm.1  | -0.4 | 0.008857 |
| TC0200005195.mm.1 | NM_001134741       | Tdrd5   | tudor domain containing 5                       | 156255296 | 156303664 | TC0100003316.mm.1  | -0.7 | 0.008865 |
| TC0200005207.mm.1 | ENSMUST00000120558 | Gm13992 | predicted gene 13992                            | 106015200 | 106015355 | TC0200001592.mm.1  | -0.2 | 0.008869 |
| TC0200005210.mm.1 | ENSMUST00000075650 | Gm9761  | predicted gene 9761                             | 116561085 | 116561426 | TC03000002809.mm.1 | -0.9 | 0.008904 |
| TC0200005217.mm.1 | NM_144830          | Tmem106 | transmembrane protein 106A                      | 101582242 | 101591788 | TC1100001661.mm.1  | 0.5  | 0.008924 |
| TC0200005218.mm.1 | ENSMUST00000079261 | Rps2-ps | ribosomal protein S2, pseudogene 13             | 52898577  | 52899509  | TC0X00000469.mm.1  | -0.5 | 0.008927 |
| TC0200005224.mm.1 | ENSMUST00000121985 | Gm14162 | predicted gene 14162                            | 152745707 | 152746307 | TC0200002299.mm.1  | -0.4 | 0.008934 |
| TC0200005225.mm.1 | ENSMUST00000178019 | Gm20784 | predicted gene, 20784                           | 119962244 | 119963227 | TC1300001358.mm.1  | -0.4 | 0.008944 |
| TC0200005235.mm.1 | ENSMUST00000178830 | Gm21378 | predicted gene, 21378                           | 120099349 | 120100332 | TC1300002757.mm.1  | -0.4 | 0.008944 |
| TC0200005260.mm.1 | NM_001004140       | Ckap2   | cytoskeleton associated protein 2               | 22168152  | 22185819  | TC0800001863.mm.1  | -0.5 | 0.008952 |
| TC0200005271.mm.1 | NM_009020          | Rag2    | recombination activating gene 2                 | 101624718 | 101632529 | TC0200001513.mm.1  | -1.4 | 0.008959 |
| TC0200005273.mm.1 | NCBI_Gene:232065:p | Igkv8-1 | immunoglobulin kappa variable 8-19              | 70340876  | 70341448  | TC0600003593.mm.1  | -0.7 | 0.008989 |
| TC0200005280.mm.1 | NM_029631          | Abhd14b | abhydrolase domain containing 14b               | 106448640 | 106452918 | TC0900001348.mm.1  | 0.5  | 0.008993 |

|                   |                    |         |                                                 |           |           |                   |      |          |
|-------------------|--------------------|---------|-------------------------------------------------|-----------|-----------|-------------------|------|----------|
| TC0200005281.mm.1 | NCBI_Gene:10012468 | Trbv19  | T cell receptor beta, variable 19               | 41178441  | 41179048  | TC0600003494.mm.1 | -1.7 | 0.009011 |
| TC0200005290.mm.1 | ENSMUST00000104925 | Gm8290  | predicted gene 8290 // predicted gene 8264 //   | 34170655  | 34171168  | TC1400000371.mm.1 | -0.9 | 0.00902  |
| TC0200005313.mm.1 | NM_008014          | Ppm1g   | protein phosphatase 1G (formerly 2C), magnesi   | 31202668  | 31220545  | TC0500002178.mm.1 | -0.8 | 0.009051 |
| TC0200005314.mm.1 | ENSMUST00000117107 | Gm15560 | predicted gene 15560                            | 7808116   | 7808758   | TC1000001702.mm.1 | -0.4 | 0.009074 |
| TC0200005317.mm.1 | XM_001004898       | Gm14217 | predicted gene 14217                            | 154700721 | 154704765 | TC0200002349.mm.1 | -0.2 | 0.009098 |
| TC0200005327.mm.1 | NM_145491          | Rhoq    | ras homolog gene family, member Q               | 86963082  | 87000069  | TC1700001303.mm.1 | 0.5  | 0.009103 |
| TC0200005328.mm.1 | NM_001014976       | Espl1   | extra spindle poles-like 1 (S. cerevisiae)      | 102296293 | 102324357 | TC1500001095.mm.1 | -0.2 | 0.009105 |
| TC0200005331.mm.1 | NM_001005423       | Mreg    | melanoregulin                                   | 722159233 | 72212307  | TC0100002552.mm.1 | -0.7 | 0.009107 |
| TC0200005335.mm.1 | NM_008381          | Inhbb   | inhibin beta-B                                  | 119415465 | 119422248 | TC0100002945.mm.1 | 0.3  | 0.009111 |
| TC0200005341.mm.1 | NCBI_Gene:630415:p | Trav14d | T cell receptor alpha variable 14D-1            | 52855614  | 52856166  | TC1400000636.mm.1 | -0.6 | 0.009115 |
| TC0200005342.mm.1 | NM_001045489       | Mfge8   | milk fat globule-EGF factor 8 protein           | 79133768  | 79149060  | TC0700003552.mm.1 | 1.0  | 0.009134 |
| TC0200005343.mm.1 | ENSMUST00000091289 | Kpna2   | karyopherin (importin) alpha 2                  | 25210764  | 25212720  | TC0300001725.mm.1 | -1.1 | 0.009138 |
| TC0200005345.mm.1 | ENSMUST00000184561 | RP23-29 | N/A                                             | 72289667  | 72290111  | TC0900000961.mm.1 | -0.6 | 0.009189 |
| TC0200005346.mm.1 | NM_153799          | Edc3    | enhancer of mRNA decapping 3 homolog (S. cere   | 57708540  | 57752499  | TC0900000714.mm.1 | -0.3 | 0.009201 |
| TC0200005347.mm.1 | NM_175554          | Clspn   | claspin                                         | 126556935 | 126593903 | TC0400001465.mm.1 | -0.5 | 0.009211 |
| TC0200005348.mm.1 | ENSMUST00000104990 | Gm7290  | predicted pseudogene 7290                       | 142757256 | 142757852 | TC0700004574.mm.1 | -0.8 | 0.009218 |
| TC0200005358.mm.1 | NM_010495          | Id1     | inhibitor of DNA binding 1                      | 152736251 | 152737410 | TC0200002298.mm.1 | 0.2  | 0.00922  |
| TC0200005359.mm.1 | ENSMUST00000117567 | Gm11560 | predicted gene 11560                            | 99932162  | 99933109  | TC1100001611.mm.1 | -0.6 | 0.009234 |
| TC0200005362.mm.1 | NM_172907          | Olfml1  | olfactomedin-like 1                             | 107567433 | 107591365 | TC0700001580.mm.1 | 0.6  | 0.009236 |
| TC0200005363.mm.1 | NM_146235          | Ercc6l  | excision repair cross-complementing rodent repi | 102141716 | 102157091 | TC0X00002736.mm.1 | -0.3 | 0.00925  |
| TC0200005364.mm.1 | NM_011763          | Zfp9    | zinc finger protein 9                           | 118461950 | 118479320 | TC0600003002.mm.1 | 0.2  | 0.009298 |
| TC0200005377.mm.1 | NM_011845          | Mid2    | midline 2                                       | 140664599 | 140767715 | TC0X00001383.mm.1 | 0.4  | 0.009298 |
| TC0200005398.mm.1 | NM_009361          | Tfdp1   | transcription factor Dp 1                       | 13338751  | 13377702  | TC0800000126.mm.1 | -0.5 | 0.009309 |
| TC0200005425.mm.1 | NM_053257          | Rpl31   | ribosomal protein L31                           | 39367851  | 39371911  | TC0100000284.mm.1 | -0.4 | 0.009319 |
| TC0200005426.mm.1 | NM_010798          | Mif     | macrophage migration inhibitory factor          | 75859353  | 75860250  | TC1000002388.mm.1 | -0.7 | 0.009321 |
| TC0200005429.mm.1 | ENSMUST00000119164 | Gm11572 | predicted gene 11572                            | 97116796  | 97116915  | TC1100003637.mm.1 | -1.1 | 0.009331 |
| TC0200005433.mm.1 | NM_0010082960      | Gm11675 | predicted gene 11675                            | 111276100 | 111276931 | TC1100001850.mm.1 | -0.4 | 0.009337 |
| TC0200005438.mm.1 | XM_990438          | Gm8618  | predicted gene 8618                             | 134109368 | 134109799 | TC0100001219.mm.1 | -0.8 | 0.00935  |
| TC0200005453.mm.1 | ENSMUST00000079818 | Gm8973  | predicted gene 8973                             | 99006056  | 99006370  | TC1500001001.mm.1 | -0.5 | 0.009359 |
| TC0200005462.mm.1 | NM_008433          | Kcnn4   | potassium intermediate/small conductance calci  | 24370263  | 24385212  | TC0700000381.mm.1 | -0.7 | 0.009401 |
| TC0200005468.mm.1 | ENSMUST00000179528 | Gm9045  | predicted gene 9045                             | 118336587 | 118337831 | TC1000002987.mm.1 | -0.5 | 0.009405 |
| TC0200005471.mm.1 | ENSMUST00000178998 | Gm9049  | predicted gene 9049                             | 118352861 | 118354105 | TC1000002990.mm.1 | -0.5 | 0.009405 |
| TC0200005489.mm.1 | ENSMUST00000079960 | Rpl13-p | ribosomal protein L13, pseudogene 3             | 58893506  | 58894129  | TC1400000832.mm.1 | -0.8 | 0.009461 |
| TC0200005490.mm.1 | ENSMUST00000121003 | Gm11829 | predicted gene 11829                            | 11133327  | 11133608  | TC0400000081.mm.1 | -0.5 | 0.009465 |
| TC0200005491.mm.1 | NR_037189          | Gm9696  | arylacetamide deacetylase-like 2 pseudogene     | 59952309  | 59973594  | TC0300000480.mm.1 | 0.3  | 0.009486 |
| TC0200005492.mm.1 | ENSMUST00000177599 | Gm5070  | predicted gene 5070                             | 95410346  | 95411176  | TC0300002479.mm.1 | -0.6 | 0.009489 |
| TC0200005494.mm.1 | NM_013723          | Podxl   | podocalyxin-like                                | 31519488  | 31563981  | TC0600002020.mm.1 | 0.5  | 0.009502 |
| TC0200005512.mm.1 | NM_026015          | Zmat5   | zinc finger, matrin type 5                      | 4704671   | 4737669   | TC1100000049.mm.1 | -0.2 | 0.009509 |
| TC0200005514.mm.1 | ENSMUST00000129154 | Hnnpa1  | heterogeneous nuclear ribonucleoprotein A1-like | 74864305  | 74865356  | TC1300000907.mm.1 | -0.6 | 0.009513 |
| TC0300000006.mm.1 | NM_009678          | Ap1m2   | adaptor protein complex AP-1, mu 2 subunit      | 21295457  | 21312333  | TC0900001868.mm.1 | -0.2 | 0.009523 |
| TC0300000007.mm.1 | NM_001082960       | Iltgam  | integrin alpha M                                | 128062640 | 128128160 | TC0700001875.mm.1 | 0.6  | 0.009536 |
| TC0300000009.mm.1 | NM_008344          | Igfbp6  | insulin-like growth factor binding protein 6    | 102144186 | 102149512 | TC1500001089.mm.1 | 0.3  | 0.009551 |
| TC0300000011.mm.1 | NM_139306          | Acer2   | alkaline ceramidase 2                           | 86874396  | 86934822  | TC0400000873.mm.1 | 0.3  | 0.009574 |
| TC0300000012.mm.1 | NM_001177307       | Aldoa   | aldolase A, fructose-bisphosphate               | 126795234 | 126800751 | TC0700004296.mm.1 | 0.4  | 0.009588 |
| TC0300000027.mm.1 | ENSMUST00000167222 | Gm9307  | predicted gene 9307                             | 82543947  | 82544189  | TC1200000774.mm.1 | -0.5 | 0.009592 |
| TC0300000028.mm.1 | NCBI_Gene:630461:p | Trav9-4 | T cell receptor alpha variable 9-4              | 53676141  | 53676630  | TC1400000705.mm.1 | -1.0 | 0.009601 |
| TC0300000041.mm.1 | NM_009764          | Brcal   | breast cancer 1                                 | 101488764 | 101551955 | TC1100003808.mm.1 | -0.3 | 0.009628 |
| TC0300000043.mm.1 | ENSMUST00000166546 | Rps2-ps | ribosomal protein S2, pseudogene 5              | 34290274  | 34291092  | TC1200001626.mm.1 | -0.4 | 0.00964  |
| TC0300000062.mm.1 | NM_001033122       | Cd69    | CD69 antigen                                    | 129267324 | 129275369 | TC0600003229.mm.1 | -0.8 | 0.009645 |
| TC0300000076.mm.1 | NM_139117          | Ybx3    | Y box protein 3                                 | 131364856 | 131388450 | TC0600003268.mm.1 | 0.4  | 0.009661 |
| TC0300000077.mm.1 | NM_177698          | Psd3    | pleckstrin and Sec7 domain containing 3 (Psd3), | 0         | 0         | TSUnmapped000002  | 0.3  | 0.009691 |
| TC0300000089.mm.1 | NM_133955          | Rhou    | ras homolog gene family, member U               | 123653929 | 123663884 | TC0800001531.mm.1 | 0.3  | 0.009743 |
| TC0300000092.mm.1 | ENSMUST00000174010 | Gm20386 | predicted gene 20386                            | 110738350 | 110738481 | TC0600001214.mm.1 | 0.3  | 0.009748 |
| TC0300000096.mm.1 | ENSMUST00000093344 | Gm15483 | predicted gene 15483 // ribosomal protein S13,  | 88530405  | 88530925  | TC0700003708.mm.1 | -1.0 | 0.009757 |
| TC0300000101.mm.1 | NM_172517          | Rbbp5   | retinoblastoma binding protein 5                | 132477367 | 132505665 | TC0100001195.mm.1 | -0.3 | 0.009783 |
| TC0300000117.mm.1 | ENSMUST00000167233 | Gm6136  | predicted pseudogene 6136                       | 86908762  | 86909703  | TC0100002752.mm.1 | -0.8 | 0.0098   |
| TC0300000119.mm.1 | NM_013608          | Naca    | nascent polypeptide-associated complex alpha p  | 128035346 | 128048637 | TC1000001580.mm.1 | -0.4 | 0.009804 |
| TC0300000130.mm.1 | ENSMUST00000082724 | Gm24166 | predicted gene, 24166                           | 44736813  | 44736947  | TC0900002174.mm.1 | -0.7 | 0.009808 |
| TC0300000139.mm.1 | NM_008536          | Tm4sf1  | transmembrane 4 superfamily member 1            | 57285611  | 57301919  | TC0300002023.mm.1 | 0.5  | 0.009823 |
| TC0300000142.mm.1 | NM_016854          | Ppp1r3c | protein phosphatase 1, regulatory (inhibitor) s | 36731731  | 36736653  | TC1900001445.mm.1 | 0.4  | 0.009836 |
| TC0300000148.mm.1 | NCBI_Gene:10012435 | Traj35  | T cell receptor alpha joining 35                | 54183774  | 54183838  | TC1400000733.mm.1 | -0.9 | 0.009846 |
| TC0300000150.mm.1 | ENSMUST00000074245 | Gm10119 | predicted gene 10119                            | 88122971  | 88123833  | TC1400002521.mm.1 | -0.8 | 0.009866 |
| TC0300000157.mm.1 | ENSMUST00000120830 | Gm13665 | predicted gene 13665                            | 73116748  | 73117275  | TC0200001068.mm.1 | -0.4 | 0.009872 |
| TC0300000159.mm.1 | NM_007723          | Cnga1   | cyclic nucleotide gated channel alpha 1         | 72603696  | 72642752  | TC0500002578.mm.1 | -0.2 | 0.009899 |
| TC0300000177.mm.1 | ENSMUST00000166459 | Gm6788  | predicted gene 6788                             | 28763430  | 28763430  | TC1900001330.mm.1 | -0.6 | 0.009912 |
| TC0300000180.mm.1 | ENSMUST00000165944 | Gm11362 | predicted gene 11362                            | 28836859  | 28837724  | TC1300000312.mm.1 | -0.4 | 0.009927 |
| TC0300000181.mm.1 | NCBI_Gene:10011537 | Trdj1   | T cell receptor delta joining 1                 | 54122274  | 54146163  | TC1400000720.mm.1 | -0.8 | 0.009941 |
| TC0300000182.mm.1 | ENSMUST00000158052 | Gm22804 | predicted gene, 22804                           | 94487883  | 94487983  | TC0400000944.mm.1 | -0.4 | 0.009965 |
| TC0300000192.mm.1 | NM_001033213       | Ttc7b   | tetratricopeptide repeat domain 7B              | 100300770 | 100520822 | TC1200002224.mm.1 | 0.5  | 0.009978 |
| TC0300000199.mm.1 | ENSMUST00000128900 | Hba-ps4 | hemoglobin alpha, pseudogene 4                  | 26286363  | 26287061  | TC1700001694.mm.1 | 0.6  | 0.009983 |
| TC0300000203.mm.1 | NM_001110009       | Apoc1   | apolipoprotein C-I                              | 19689480  | 19692659  | TC0700002496.mm.1 | 0.6  | 0.009988 |
| TC0300000210.mm.1 | NM_011581          | Thbs2   | thrombospondin 2                                | 14665500  | 14694262  | TC1700001484.mm.1 | 0.5  | 0.010004 |
| TC0300000227.mm.1 | NM_133777          | Ube2s   | ubiquitin-conjugating enzyme E2S                | 4808014   | 4812351   | TC0700002173.mm.1 | -0.7 | 0.010014 |
| TC0300000230.mm.1 | NCBI_Gene:10012467 | Trbv14  | T cell receptor beta, variable 14               | 41135167  | 41135616  | TC0600000426.mm.1 | -1.0 | 0.01002  |
| TC0300000255.mm.1 | NM_177564          | Dhrs11  | dehydrogenase/reductase (SDR family) member     | 84820726  | 84829003  | TC1100003418.mm.1 | 0.1  | 0.010024 |
| TC0300000257.mm.1 | NM_001198790       | Ak1     | adenylate kinase 1                              | 32621758  | 32635058  | TC0200005471.mm.1 | 0.2  | 0.010048 |
| TC0300000260.mm.1 | XM_915945          | Gm14407 | predicted gene 14407                            | 177064935 | 177085802 | TC0200005358.mm.1 | -0.5 | 0.010125 |
| TC0300000269.mm.1 | ENSMUST00000174284 | Gm18889 | predicted gene, 18889                           | 36119998  | 36120926  | TC1500001367.mm.1 | -0.4 | 0.01016  |

|                   |                    |         |                                                 |           |           |                    |      |          |
|-------------------|--------------------|---------|-------------------------------------------------|-----------|-----------|--------------------|------|----------|
| TC0300000275.mm.1 | ENSMUST00000104970 | Gm16499 | predicted gene 16499                            | 53819975  | 53820040  | TC0600000645.mm.1  | 0.3  | 0.01017  |
| TC0300000288.mm.1 | ENSMUST00000117058 | Gm13410 | predicted gene 13410                            | 24178834  | 24180317  | TC0200000375.mm.1  | -0.3 | 0.010175 |
| TC0300000291.mm.1 | XM_145468          | Gm4883  | predicted gene 4883                             | 30709736  | 30710302  | TC0700000572.mm.1  | -1.0 | 0.01019  |
| TC0300000292.mm.1 | OTTMUST00000054089 | AC12734 | ---                                             | 133738479 | 133738934 | TC0700004430.mm.1  | -0.9 | 0.010202 |
| TC0300000299.mm.1 | BC062898           | Dnaaf2  | dynein, axonemal assembly factor 2              | 69189087  | 69198429  | TC1200002528.mm.1  | -0.2 | 0.010204 |
| TC0300000301.mm.1 | ENSMUST00000082863 | Gm24357 | predicted gene, 24357                           | 15315522  | 15315595  | TC0900000119.mm.1  | -1.6 | 0.010213 |
| TC0300000304.mm.1 | ENSMUST00000167629 | Gm17366 | predicted gene, 17366                           | 106698109 | 106698298 | TC1400002674.mm.1  | -0.4 | 0.010223 |
| TC0300000312.mm.1 | XR_140964          | Gm20326 | predicted gene, 20326                           | 112138578 | 112141500 | TC09000003142.mm.1 | -0.9 | 0.010233 |
| TC0300000314.mm.1 | NR_030780          | Ankrd10 | ankyrin repeat domain 10                        | 11611581  | 11635757  | TC0800001701.mm.1  | -0.3 | 0.010247 |
| TC0300000323.mm.1 | ENSMUST00000165577 | Gm17150 | predicted gene 17150                            | 58790195  | 58790575  | TC1900000844.mm.1  | -0.5 | 0.010268 |
| TC0300000333.mm.1 | ENSMUST00000179174 | Gm8532  | predicted gene 8532                             | 131632506 | 131632874 | TC0100003064.mm.1  | -0.4 | 0.010285 |
| TC0300000339.mm.1 | NM_145831          | Dmrt2   | doublesex and mab-3 related transcription facto | 25672411  | 25679010  | TC1900000407.mm.1  | 0.6  | 0.010291 |
| TC0300000340.mm.1 | NCBI_Gene:381784:p | Igkv6-2 | immunoglobulin kappa chain variable 6-25        | 70215433  | 70215957  | TC06000003526.mm.1 | -1.8 | 0.010335 |
| TC0300000341.mm.1 | NM_011133          | Pole2   | polymerase (DNA directed), epsilon 2 (p59 subur | 69201775  | 69228190  | TC1200001861.mm.1  | -0.4 | 0.010347 |
| TC0300000342.mm.1 | ENSMUST00000019997 | Tnfrsf3 | tumor necrosis factor, alpha-induced protein 3  | 19000910  | 19015657  | TC1000001813.mm.1  | -0.5 | 0.010356 |
| TC0300000343.mm.1 | ENSMUST00000182794 | Gm27038 | predicted gene, 27038                           | 94756698  | 94756872  | TC1700002756.mm.1  | -0.3 | 0.010365 |
| TC0300000347.mm.1 | XM_001472394       | Gm9780  | predicted gene 9780                             | 26027278  | 26042860  | TC1400001608.mm.1  | 0.6  | 0.010371 |
| TC0300000349.mm.1 | NM_026069          | Rpl37   | ribosomal protein L37                           | 5116613   | 5119140   | TC1500000019.mm.1  | -0.5 | 0.010403 |
| TC0300000354.mm.1 | NM_009427          | Tob1    | transducer of ErbB-2.1                          | 94211454  | 94215495  | TC1100001430.mm.1  | 0.3  | 0.010415 |
| TC0300000357.mm.1 | ENSMUST00000121411 | Gm15536 | predicted gene 15536                            | 7038661   | 7038774   | TC1000000042.mm.1  | -1.1 | 0.010429 |
| TC0300000360.mm.1 | ENSMUST00000184373 | RP23-29 | N/A                                             | 72618693  | 72619520  | TC0900002645.mm.1  | -0.5 | 0.010431 |
| TC0300000370.mm.1 | NM_010117          | Rhbd1   | rhomboid family 1 (Drosophila)                  | 32209585  | 32222300  | TC1100002471.mm.1  | 0.2  | 0.010432 |
| TC0300000382.mm.1 | NCBI_Gene:10004320 | Trav3d- | T cell receptor alpha variable 3D-3             | 52972532  | 52973038  | TC1400000649.mm.1  | -0.6 | 0.010432 |
| TC0300000396.mm.1 | NM_153053          | Sf3b4   | splicing factor 3b, subunit 4                   | 96172332  | 96177564  | TC0300000926.mm.1  | -0.2 | 0.010473 |
| TC0300000399.mm.1 | NM_009896          | Socs1   | suppressor of cytokine signaling 1              | 10783808  | 10785536  | TC1600001198.mm.1  | -0.2 | 0.010495 |
| TC0300000404.mm.1 | NCBI_Gene:10077517 | Ighv1-8 | immunoglobulin heavy variable 1-82              | 115952538 | 115952831 | TC1200002661.mm.1  | -1.9 | 0.010498 |
| TC0300000409.mm.1 | NM_053137          | Pcdh12  | protocadherin beta 12                           | 37435621  | 37438654  | TC1800000368.mm.1  | 0.2  | 0.010526 |
| TC0300000412.mm.1 | ENSMUST00000178617 | Gm7083  | predicted gene 7083                             | 59977722  | 59978171  | TC1500000441.mm.1  | -0.6 | 0.010533 |
| TC0300000416.mm.1 | XR_105988          | Gm19788 | predicted gene, 19788                           | 53893830  | 53896554  | TC1900000764.mm.1  | -0.2 | 0.010535 |
| TC0300000423.mm.1 | NM_175663          | Hist1h2 | histone cluster 1, H2ba                         | 23933768  | 23934156  | TC1300001652.mm.1  | -0.7 | 0.010536 |
| TC0300000430.mm.1 | NM_001195431       | Islr    | immunoglobulin superfamily containing leucine-  | 58156264  | 58159221  | TC0900002387.mm.1  | 0.5  | 0.010551 |
| TC0300000439.mm.1 | NM_144944          | Prokr2  | prokineticin receptor 2                         | 132337733 | 132385447 | TC02000004672.mm.1 | -0.3 | 0.010593 |
| TC0300000465.mm.1 | NM_001190356       | Gm4832  | predicted gene 4832                             | 88125512  | 88131116  | TC1700001316.mm.1  | -0.4 | 0.010605 |
| TC0300000480.mm.1 | NM_173417          | Kcns3   | potassium voltage-gated channel, delayed-rectif | 11090202  | 11150842  | TC1200001416.mm.1  | 0.2  | 0.010614 |
| TC0300000484.mm.1 | NM_001195421       | Hist1h4 | histone cluster 1, H4m                          | 21811746  | 21812150  | TC13000000182.mm.1 | -1.1 | 0.010618 |
| TC0300000487.mm.1 | NM_001045516       | Proca1  | protein interacting with cyclin A1              | 78193392  | 78205763  | TC1100001150.mm.1  | 0.2  | 0.01064  |
| TC0300000491.mm.1 | ENSMUST00000119844 | Gm12428 | predicted gene 12428                            | 98821038  | 98821764  | TC0300000983.mm.1  | -0.6 | 0.010695 |
| TC0300000499.mm.1 | NM_153063          | Zfp472  | zinc finger protein 472                         | 32965814  | 32979233  | TC1700000571.mm.1  | -0.2 | 0.010706 |
| TC0300000507.mm.1 | NM_053261          | Impa2   | inositol (myo)-1(or 4)-monophosphatase 2        | 67289223  | 67319146  | TC1800000700.mm.1  | -0.3 | 0.010709 |
| TC0300000510.mm.1 | NM_175660          | Hist1h2 | histone cluster 1, H2ab                         | 23751088  | 23751598  | TC1300000260.mm.1  | -1.4 | 0.010729 |
| TC0300000525.mm.1 | uc029vco.1         | Gm5859  | SubName: Full=Putative uncharacterized protein  | 222571    | 223717    | TC4_G456350_rand   | 0.5  | 0.010744 |
| TC0300000527.mm.1 | NM_001122873       | Ubl7    | ubiquitin-like 7 (bone marrow stromal cell-deri | 57910986  | 57929968  | TC0900000719.mm.1  | 0.6  | 0.010772 |
| TC0300000539.mm.1 | NM_011324          | Scnn1a  | sodium channel, nonvoltage-gated 1 alpha        | 125320659 | 125344943 | TC0600001458.mm.1  | -0.4 | 0.010824 |
| TC0300000550.mm.1 | NM_029522          | Gpsm2   | G-protein signalling modulator 2 (AGS3-like, C. | 108678638 | 108722309 | TC03000002750.mm.1 | -0.3 | 0.010864 |
| TC0300000555.mm.1 | ENSMUST00000117231 | Gm11191 | predicted gene 11191                            | 77747041  | 77748041  | TC1100001132.mm.1  | -0.4 | 0.010865 |
| TC0300000559.mm.1 | NM_013863          | Bag3    | BCL2-associated athanogene 3                    | 128523583 | 128546981 | TC0700001886.mm.1  | 0.4  | 0.010891 |
| TC0300000568.mm.1 | NM_001013390       | Scn4b   | sodium channel, type IV, beta                   | 45138437  | 45154152  | TC0900000535.mm.1  | -0.3 | 0.01091  |
| TC0300000575.mm.1 | NM_001004154       | Rragb   | Ras-related GTP binding B                       | 153139958 | 153171943 | TC0X00001555.mm.1  | -0.2 | 0.010921 |
| TC0300000576.mm.1 | NM_030609          | Hist1h1 | histone cluster 1, H1a                          | 23763668  | 23764414  | TC1300000262.mm.1  | -1.7 | 0.010922 |
| TC0300000579.mm.1 | NM_007826          | Dach1   | dachshund 1 (Drosophila)                        | 97786846  | 98169765  | TC1400002578.mm.1  | 0.2  | 0.010929 |
| TC0300000585.mm.1 | ENSMUST00000123179 | Gm12666 | predicted gene 12666                            | 92190744  | 92191749  | TC04000003051.mm.1 | -0.5 | 0.010931 |
| TC0300000591.mm.1 | NM_001252647       | 4833439 | RIKEN cDNA 4833439L19 gene                      | 54551192  | 54565435  | TC1300002034.mm.1  | 0.7  | 0.010932 |
| TC0300000599.mm.1 | NM_181415          | Atrnl1  | attractin like 1                                | 57611034  | 58133343  | TC1900000819.mm.1  | 0.4  | 0.010941 |
| TC0300000607.mm.1 | ENSMUST00000179051 | Gm7658  | predicted gene 7658                             | 21511870  | 21513127  | TC0100002044.mm.1  | -0.3 | 0.010955 |
| TC0300000616.mm.1 | NM_181858          | Cd59b   | CD59b antigen                                   | 104069805 | 104091190 | TC0200001551.mm.1  | 0.3  | 0.010958 |
| TC0300000617.mm.1 | NM_026047          | Rnf219  | ring finger protein 219                         | 104477534 | 104522666 | TC1400002649.mm.1  | -0.2 | 0.01097  |
| TC0300000618.mm.1 | ENSMUST00000139887 | Gm15274 | predicted gene 15274                            | 33426304  | 33426594  | TC0X00000291.mm.1  | -0.2 | 0.011012 |
| TC0300000624.mm.1 | ENSMUST00000157136 | Gm23981 | predicted gene, 23981                           | 77807535  | 77807640  | TC0800000868.mm.1  | 0.2  | 0.011032 |
| TC0300000631.mm.1 | NM_001081189       | Uprt    | uracil phosphoribosyltransferase (FUR1) homolo  | 104482782 | 104507490 | TC0X00001047.mm.1  | 0.6  | 0.011069 |
| TC0300000640.mm.1 | NM_198613          | Ap2s1   | adaptor-related protein complex 2, sigma 1 subu | 16738410  | 16749294  | TC0700000234.mm.1  | -0.2 | 0.011081 |
| TC0300000641.mm.1 | NM_025889          | Tmem134 | transmembrane protein 134                       | 4125934   | 4132307   | TC1900000028.mm.1  | 0.2  | 0.011098 |
| TC0300000646.mm.1 | NM_173762          | Cenpe   | centromere protein E                            | 135212563 | 135273540 | TC0300001364.mm.1  | -0.7 | 0.011105 |
| TC0300000647.mm.1 | NM_013853          | Abcf2   | ATP-binding cassette, sub-family F (GCN20), mer | 24565341  | 24577467  | TC0500002085.mm.1  | -0.5 | 0.011131 |
| TC0300000667.mm.1 | NM_008160          | Gpx1    | glutathione peroxidase 1                        | 108339080 | 108340344 | TC09000001402.mm.1 | 0.8  | 0.011148 |
| TC0300000673.mm.1 | NM_178205          | Hist1h3 | histone cluster 1, H3e                          | 23561534  | 23562369  | TC1300001633.mm.1  | -1.2 | 0.011184 |
| TC0300000677.mm.1 | NM_178210          | Hist1h4 | histone cluster 1, H4j                          | 21735034  | 21735837  | TC1300000176.mm.1  | -0.5 | 0.011185 |
| TC0300000685.mm.1 | ENSMUST00000118292 | Gm14571 | predicted gene 14571                            | 39796584  | 39797153  | TC0X00000381.mm.1  | -0.3 | 0.011189 |
| TC0300000688.mm.1 | ENSMUST00000117116 | Gm13047 | predicted gene 13047                            | 141084864 | 141085678 | TC0400001776.mm.1  | -0.3 | 0.011198 |
| TC0300000689.mm.1 | ENSMUST00000164923 | Gm5277  | predicted gene 5277                             | 78891864  | 78892451  | TC03000002182.mm.1 | -0.7 | 0.011221 |
| TC0300000690.mm.1 | ENSMUST00000180073 | Gm23571 | predicted gene, 23571                           | 10499763  | 10499889  | TC0200000165.mm.1  | -0.3 | 0.011228 |
| TC0300000693.mm.1 | NM_013859          | Znhit2  | zinc finger, HIT domain containing 2            | 6061192   | 6062472   | TC1900000097.mm.1  | -0.2 | 0.011234 |
| TC0300000695.mm.1 | ENSMUST00000117851 | Gm11478 | predicted gene 11478                            | 86630428  | 86631026  | TC1100003452.mm.1  | -1.0 | 0.011257 |
| TC0300000697.mm.1 | ENSMUST00000118817 | Gm5764  | predicted gene 5764                             | 158833435 | 158834319 | TC0X00001610.mm.1  | -0.3 | 0.011262 |
| TC0300000699.mm.1 | NM_030724          | Uck2    | uridine-cytidine kinase 2                       | 167226083 | 167285127 | TC0100003478.mm.1  | -0.9 | 0.011275 |
| TC0300000700.mm.1 | NM_0028292         | Ppme1   | protein phosphatase methylesterase 1            | 100326737 | 100371896 | TC07000003818.mm.1 | -0.3 | 0.011282 |
| TC0300000706.mm.1 | ENSMUST00000116032 | Gm16073 | predicted gene 16073                            | 65838167  | 65838683  | TC0900000853.mm.1  | -0.5 | 0.011288 |
| TC0300000707.mm.1 | NM_023215          | Chtop   | chromatin target of PRMT1                       | 90498956  | 90509498  | TC0300002373.mm.1  | -0.3 | 0.011308 |
| TC0300000709.mm.1 | ENSMUST00000112525 | Pla2r1  | phospholipase A2 receptor 1                     | 60417543  | 60553308  | TC0200003603.mm.1  | 0.2  | 0.011312 |

|                   |                    |          |                                                 |           |           |                   |      |          |
|-------------------|--------------------|----------|-------------------------------------------------|-----------|-----------|-------------------|------|----------|
| TC0300000714.mm.1 | ENSMUST00000157353 | Gm23713  | predicted gene, 23713                           | 62136762  | 62136831  | TC1300000750.mm.1 | -0.7 | 0.011318 |
| TC0300000722.mm.1 | ENSMUST00000158102 | Gm22615  | predicted gene, 22615                           | 62543434  | 62543503  | TC1300002168.mm.1 | -0.7 | 0.011318 |
| TC0300000724.mm.1 | ENSMUST00000117894 | Gm14529  | predicted gene 14529                            | 20339299  | 20339704  | TC0X00000203.mm.1 | -0.4 | 0.011324 |
| TC0300000730.mm.1 | NM_013762          | Rpl3     | ribosomal protein L3                            | 80077781  | 80083406  | TC1500001896.mm.1 | -0.6 | 0.011332 |
| TC0300000731.mm.1 | ENSMUST00000170335 | Gm8842   | predicted gene 8842 // predicted gene 8841 //   | 61259040  | 61259987  | TC1800001416.mm.1 | -0.6 | 0.011339 |
| TC0300000734.mm.1 | ENSMUST00000122012 | Gm6285   | predicted gene 6285                             | 104947785 | 104948282 | TC0X00001052.mm.1 | -1.4 | 0.011353 |
| TC0300000735.mm.1 | NM_011923          | Angptl2  | angiopoietin-like 2                             | 33215961  | 33247717  | TC0200000603.mm.1 | 0.4  | 0.011368 |
| TC0300000739.mm.1 | NCBI_Gene:10011341 | Trav13   | Trav13-4-dv7 T cell receptor alpha variable 13- | 53757356  | 53757921  | TC1400002818.mm.1 | -0.4 | 0.01137  |
| TC0300000741.mm.1 | ENSMUST00000118055 | Gm15399  | predicted gene 15399                            | 123984097 | 123985063 | TC0300002883.mm.1 | -0.3 | 0.011377 |
| TC0300000750.mm.1 | NCBI_Gene:381783:p | Igkv5-4  | immunoglobulin kappa chain variable 5-43        | 69823355  | 69823911  | TC0600003580.mm.1 | -1.7 | 0.011387 |
| TC0300000753.mm.1 | NM_029936          | Ddx10    | DEAD (Asp-Glu-Ala-Asp) box polypeptide 10       | 53098454  | 53248112  | TC0900002302.mm.1 | -0.4 | 0.011393 |
| TC0300000761.mm.1 | NR_110572          | Zeb2os   | zinc finger E-box binding homeobox 2, opposite  | 0         | 0         | TSUnmapped0000007 | 0.4  | 0.011406 |
| TC0300000766.mm.1 | NM_009656          | Aldh2    | aldehyde dehydrogenase 2, mitochondrial         | 121566027 | 121593824 | TC0500003193.mm.1 | 1.1  | 0.01143  |
| TC0300000772.mm.1 | ENSMUST00000117031 | Gm23990  | predicted gene, 23990                           | 105597625 | 105597741 | TC1100001757.mm.1 | 0.4  | 0.011459 |
| TC0300000781.mm.1 | NM_134082          | Farp1    | FERM, RhoGEF (Arhgef) and pleckstrin domain p   | 121035200 | 121283744 | TC1400001315.mm.1 | 0.3  | 0.011474 |
| TC0300000782.mm.1 | NM_029835          | Ticrr    | TOPBP1-interacting checkpoint and replication r | 79660196  | 79698148  | TC0700001131.mm.1 | -0.5 | 0.011568 |
| TC0300000785.mm.1 | NM_009875          | Cdkn1b   | cyclin-dependent kinase inhibitor 1B            | 134920401 | 134925525 | TC0600001595.mm.1 | -0.6 | 0.011619 |
| TC0300000787.mm.1 | NR_030555          | Mir297c  | microRNA 297c                                   | 185537336 | 185988795 | TC0100001790.mm.1 | 0.6  | 0.01162  |
| TC0300000799.mm.1 | NM_009648          | Akap1    | A kinase (PRKA) anchor protein 1                | 88830792  | 88864586  | TC1100003505.mm.1 | 0.2  | 0.011623 |
| TC0300000800.mm.1 | NM_009381          | Thrsp    | thyroid hormone responsive                      | 97412938  | 97417730  | TC0700003764.mm.1 | 1.5  | 0.011636 |
| TC0300000801.mm.1 | NM_001290282       | Rcor3    | REST corepressor 3 (Rcor3), transcript variant  | 0         | 0         | TSUnmapped0000000 | 0.3  | 0.011696 |
| TC0300000802.mm.1 | NM_018780          | Sfrp5    | secreted frizzled-related sequence protein 5    | 42197971  | 42202252  | TC1900001522.mm.1 | 0.9  | 0.011702 |
| TC0300000809.mm.1 | NM_001198894       | Gpr56    | G protein-coupled receptor 56                   | 94977109  | 95014208  | TC0800001126.mm.1 | 0.5  | 0.011742 |
| TC0300000811.mm.1 | NM_001017441       | Tbata    | thymus, brain and testes associated             | 61171954  | 61188841  | TC1000000560.mm.1 | -0.9 | 0.011771 |
| TC0300000817.mm.1 | ENSMUST00000121059 | Rpl19-p  | ribosomal protein L19, pseudogene 1             | 85012114  | 85012704  | TC0100000734.mm.1 | -0.9 | 0.011782 |
| TC0300000821.mm.1 | NM_009156          | Sepw1    | selenoprotein W, muscle 1                       | 15917208  | 15922402  | TC0700002414.mm.1 | 0.6  | 0.011826 |
| TC0300000822.mm.1 | NM_024495          | Car13    | carbonic anhydrase 13                           | 14641727  | 14663002  | TC0300000092.mm.1 | 0.4  | 0.011832 |
| TC0300000823.mm.1 | NM_130449          | Colec12  | collectin sub-family member 12                  | 9707648   | 9877995   | TC1800000063.mm.1 | 0.8  | 0.011844 |
| TC0300000828.mm.1 | NCBI_Gene:10012645 | Trav6n-  | T cell receptor alpha variable 6N-7             | 53318812  | 54224204  | TC1400000684.mm.1 | -0.7 | 0.011848 |
| TC0300000833.mm.1 | NM_007883          | Dsg2     | desmoglein 2                                    | 20558074  | 20604526  | TC1800000157.mm.1 | -0.3 | 0.011864 |
| TC0300000835.mm.1 | NM_008329          | Ifi204   | interferon activated gene 204                   | 173747293 | 173766919 | TC0100003888.mm.1 | 0.5  | 0.0119   |
| TC0300000837.mm.1 | NM_027212          | Med30    | mediator complex subunit 30                     | 52712445  | 52730433  | TC1500000380.mm.1 | -0.6 | 0.011917 |
| TC0300000840.mm.1 | NM_011295          | Rps12    | ribosomal protein S12                           | 23785183  | 23787209  | TC1000001881.mm.1 | -0.4 | 0.011922 |
| TC0300000845.mm.1 | NM_001143671       | Tmem255  | transmembrane protein 255B                      | 13435459  | 13461452  | TC0800000128.mm.1 | 0.4  | 0.011958 |
| TC0300000852.mm.1 | NM_012030          | Slc9a3r  | solute carrier family 9 (sodium/hydrogen exchan | 115163341 | 115181181 | TC1100001886.mm.1 | -0.6 | 0.011959 |
| TC0300000858.mm.1 | ENSMUST00000074645 | Gm11353  | predicted gene 11353                            | 26492514  | 26493219  | TC0900000290.mm.1 | -0.6 | 0.011968 |
| TC0300000864.mm.1 | NCBI_Gene:638566:p | Trav13-  | T cell receptor alpha variable 13-2             | 53634829  | 53635399  | TC1400000703.mm.1 | -0.3 | 0.011991 |
| TC0300000865.mm.1 | ENSMUST00000183619 | RP23-29  | N/A                                             | 72551728  | 72551935  | TC0900000972.mm.1 | -0.2 | 0.012019 |
| TC0300000872.mm.1 | NM_001177352       | Myc      | myelocytomatosis oncogene                       | 61985341  | 61990374  | TC1500000453.mm.1 | -0.5 | 0.012037 |
| TC0300000873.mm.1 | NM_001081258       | Kif14    | kinesin family member 14                        | 136467848 | 136531511 | TC0100001271.mm.1 | -0.5 | 0.012049 |
| TC0300000875.mm.1 | XM_001478111       | Gm10193  | predicted gene 10193                            | 105764444 | 105764674 | TC0100001010.mm.1 | -0.5 | 0.012054 |
| TC0300000887.mm.1 | NM_009293          | Sts      | steroid sulfatase                               | 0         | 0         | TSUnmapped0000005 | 0.2  | 0.012091 |
| TC0300000890.mm.1 | NM_007570          | Btg2     | B cell translocation gene 2, anti-proliferative | 134074865 | 134079155 | TC0100003102.mm.1 | -0.5 | 0.012121 |
| TC0300000891.mm.1 | NM_007388          | Acp5     | acid phosphatase 5, tartrate resistant          | 22126727  | 22135746  | TC0900001900.mm.1 | 0.6  | 0.012122 |
| TC0300000902.mm.1 | ENSMUST00000119465 | Gm12757  | predicted gene 12757                            | 33879295  | 33880094  | TC0700000623.mm.1 | -0.3 | 0.012129 |
| TC0300000903.mm.1 | NM_026282          | Spc24    | SPC24, NDC80 kinetochore complex component,     | 21755442  | 21760289  | TC0900001883.mm.1 | -0.5 | 0.012131 |
| TC0300000907.mm.1 | NR_035491          | Mir1965  | microRNA 1965                                   | 80152890  | 80153015  | TC0700003584.mm.1 | -0.2 | 0.012153 |
| TC0300000910.mm.1 | ENSMUST00000167150 | Rpl19-p  | ribosomal protein L19, pseudogene 7             | 13777814  | 13778440  | TC1400001468.mm.1 | -0.8 | 0.012175 |
| TC0300000922.mm.1 | NM_013598          | Kitl     | kit ligand                                      | 100015630 | 100100413 | TC1000001216.mm.1 | 0.3  | 0.012187 |
| TC0300000926.mm.1 | NM_007484          | Rhoc     | ras homolog gene family, member C               | 104789011 | 104794459 | TC0300001081.mm.1 | 0.5  | 0.012212 |
| TC0300000927.mm.1 | NM_029498          | Zmym2    | zinc finger, MYM-type 2                         | 56886653  | 56962579  | TC1400000813.mm.1 | -0.4 | 0.012225 |
| TC0300000929.mm.1 | ENSMUST00000121155 | Gm5391   | predicted gene 5391                             | 68319638  | 68320250  | TC0X00002372.mm.1 | -0.4 | 0.012232 |
| TC0300000930.mm.1 | NM_001276492       | Dag1     | dystroglycan 1                                  | 108204861 | 108263958 | TC0900003055.mm.1 | 0.3  | 0.012261 |
| TC0300000934.mm.1 | NM_146061          | Prr5     | proline rich 5 (renal)                          | 84663244  | 84703673  | TC1500000791.mm.1 | 0.4  | 0.012269 |
| TC0300000935.mm.1 | ENSMUST00000084614 | Gm10288  | predicted gene 10288                            | 146838775 | 146839365 | TC0300003108.mm.1 | -0.7 | 0.012271 |
| TC0300000936.mm.1 | NM_016910          | Ppm1d    | protein phosphatase 1D magnesium-dependent,     | 85311244  | 85347071  | TC1100001291.mm.1 | -0.3 | 0.012287 |
| TC0300000941.mm.1 | NM_026481          | Tppp3    | tubulin polymerization-promoting protein family | 105467492 | 105471526 | TC0800002822.mm.1 | 0.2  | 0.012307 |
| TC0300000942.mm.1 | NCBI_Gene:547330:p | Trav14-  | T cell receptor alpha variable 14-3             | 53763083  | 54149146  | TC1400002809.mm.1 | -0.6 | 0.012328 |
| TC0300000947.mm.1 | XM_001476133       | Gm3362   | predicted pseudogene 3362                       | 37943279  | 37950528  | TC1500001402.mm.1 | -1.0 | 0.012354 |
| TC0300000952.mm.1 | NM_001011852       | Olfir102 | olfactory receptor 1029                         | 85975213  | 85976273  | TC0100001260.mm.1 | 0.2  | 0.012364 |
| TC0300000956.mm.1 | ENSMUST00000121969 | Gm11334  | predicted gene 11334                            | 23382505  | 23382660  | TC1300000241.mm.1 | -0.5 | 0.012372 |
| TC0300000958.mm.1 | NM_027852          | Rarres2  | retinoic acid receptor responder (tazarotene in | 48569468  | 48572690  | TC0600002225.mm.1 | 0.8  | 0.012414 |
| TC0300000979.mm.1 | NM_021309          | Sh2d2a   | SH2 domain protein 2A                           | 87846755  | 87855722  | TC0300000706.mm.1 | -0.6 | 0.012417 |
| TC0300000983.mm.1 | NM_007853          | Degs1    | degenerative spermatocyte homolog 1 (Drosoph    | 182275770 | 182282804 | TC0100003709.mm.1 | 0.3  | 0.012439 |
| TC0300000991.mm.1 | NM_010828          | Cited2   | Cbp/p300-interacting transactivator, with Glu/A | 17723228  | 17725674  | TC1000000122.mm.1 | 0.3  | 0.01246  |
| TC0300000995.mm.1 | ENSMUST00000118709 | Rps8-ps  | ribosomal protein S8, pseudogene 2              | 175804983 | 175805609 | TC0200005343.mm.1 | -1.1 | 0.012478 |
| TC0300000996.mm.1 | NM_027297          | Prpf4    | PRP4 pre-mRNA processing factor 4 homolog (ye   | 62408783  | 62426990  | TC0400000700.mm.1 | -0.3 | 0.012497 |
| TC0300001040.mm.1 | NM_001115010       | Lin54    | lin-54 homolog (C. elegans)                     | 100441918 | 100500639 | TC0500002836.mm.1 | -0.2 | 0.012541 |
| TC0300001047.mm.1 | ENSMUST00000081336 | Gm6065   | predicted gene 6065                             | 17792574  | 17793065  | TC0700000258.mm.1 | -0.5 | 0.012558 |
| TC0300001052.mm.1 | XM_889893          | H3f3c    | H3 histone, family 3C                           | 119665626 | 119666152 | TC0000004444.mm.1 | -0.7 | 0.012567 |
| TC0300001061.mm.1 | NM_007589          | Calm2    | calmodulin 2                                    | 87433401  | 87446935  | TC1700002692.mm.1 | -0.4 | 0.012571 |
| TC0300001072.mm.1 | NCBI_Gene:436479:p | Trav9-2  | T cell receptor alpha variable 9-2              | 53590974  | 53592110  | TC1400002813.mm.1 | -0.7 | 0.012575 |
| TC0300001076.mm.1 | NM_152839          | Igj      | immunoglobulin joining chain                    | 88519809  | 88527897  | TC0500002712.mm.1 | -0.8 | 0.012695 |
| TC0300001079.mm.1 | ENSMUST00000120054 | Gm5406   | predicted gene 5406                             | 45411580  | 45412345  | TC1600000677.mm.1 | -0.3 | 0.012723 |
| TC0300001081.mm.1 | NM_019759          | Dpt      | dermatopontin                                   | 164796718 | 164824273 | TC0100001510.mm.1 | 1.6  | 0.012726 |
| TC0300001094.mm.1 | NM_008035          | Folr2    | folate receptor 2 (fetal)                       | 101839988 | 101845331 | TC0700003845.mm.1 | 1.1  | 0.012776 |
| TC0300001100.mm.1 | ENSMUST00000136893 | Rpl36-p  | ribosomal protein L36, pseudogene 2             | 76601319  | 76601629  | TC1100001102.mm.1 | -0.7 | 0.012781 |
| TC0300001109.mm.1 | NM_007929          | Emp2     | epithelial membrane protein 2                   | 10281749  | 10313968  | TC1600001191.mm.1 | 0.2  | 0.012785 |

|                   |                    |         |                                                 |           |           |                    |      |          |
|-------------------|--------------------|---------|-------------------------------------------------|-----------|-----------|--------------------|------|----------|
| TC0300001111.mm.1 | NM_153062          | Slc37a1 | solute carrier family 37 (glycerol-3-phosphate  | 31295483  | 31350709  | TC1700000533.mm.1  | -0.2 | 0.01279  |
| TC0300001116.mm.1 | NM_009860          | Cdc25c  | cell division cycle 25C                         | 34732995  | 34751533  | TC1800001156.mm.1  | -0.5 | 0.012807 |
| TC0300001124.mm.1 | NM_018779          | Pde3a   | phosphodiesterase 3A, cGMP inhibited            | 141249269 | 141499351 | TC0600001664.mm.1  | 0.2  | 0.012864 |
| TC0300001127.mm.1 | ENSMUST00000178899 | Gm21182 | predicted gene, 21182                           | 20556695  | 20557333  | TC0800001827.mm.1  | -0.2 | 0.012885 |
| TC0300001153.mm.1 | XM_001480849       | Gm9525  | predicted gene 9525                             | 22535025  | 22535297  | TC1600001383.mm.1  | -0.7 | 0.012899 |
| TC0300001159.mm.1 | NCBI_Gene:667567:p | Trav14- | T cell receptor alpha variable 14-2             | 53640701  | 53641225  | TC1400002808.mm.1  | -0.6 | 0.012906 |
| TC0300001161.mm.1 | NCBI_Gene:384411:p | Igkv12- | immunoglobulin kappa chain variable 12-89       | 68834846  | 68835307  | TC0600003549.mm.1  | -0.6 | 0.012952 |
| TC0300001164.mm.1 | ENSMUST00000172723 | Gm5967  | predicted gene 5967                             | 37947192  | 37947685  | TC1700000791.mm.1  | -0.2 | 0.012973 |
| TC0300001175.mm.1 | NM_133815          | Lbr     | lamin B receptor                                | 181815315 | 181842401 | TC0100003697.mm.1  | -1.2 | 0.012974 |
| TC0300001181.mm.1 | ENSMUST00000183828 | RP23-16 | N/A                                             | 71948879  | 71948977  | TC0900000952.mm.1  | -0.5 | 0.013007 |
| TC0300001184.mm.1 | NM_026031          | Utp11l  | UTP11-like, U3 small nucleolar ribonucleoprotei | 124678160 | 124693600 | TC0400003506.mm.1  | -0.3 | 0.013016 |
| TC0300001192.mm.1 | ENSMUST00000119515 | Gm11814 | predicted gene 11814                            | 10438815  | 10439743  | TC0400002193.mm.1  | 0.4  | 0.013024 |
| TC0300001198.mm.1 | NCBI_Gene:667765:p | Trav10  | T cell receptor alpha variable 10               | 53505727  | 53506286  | TC1400000698.mm.1  | -0.4 | 0.013032 |
| TC0300001214.mm.1 | NM_173385          | Cilp    | cartilage intermediate layer protein, nucleotid | 65265180  | 65280608  | TC0900000834.mm.1  | 0.3  | 0.013034 |
| TC0300001225.mm.1 | NM_133687          | Cxxc5   | CXXC finger 5                                   | 35829818  | 35861688  | TC1800000319.mm.1  | -0.2 | 0.013039 |
| TC0300001226.mm.1 | NM_019489          | Ppie    | peptidylprolyl isomerase E (cyclophilin E)      | 123127115 | 123139951 | TC0400003478.mm.1  | -0.1 | 0.01307  |
| TC0300001228.mm.1 | NM_001080158       | Cenpm   | centromere protein M                            | 82233762  | 82244747  | TC1500001940.mm.1  | -0.4 | 0.013075 |
| TC0300001229.mm.1 | NM_001163769       | U2af1   | U2 small nuclear ribonucleoprotein auxiliary fa | 31647082  | 31658754  | TC1700001824.mm.1  | -0.8 | 0.013125 |
| TC0300001232.mm.1 | NM_022024          | Gmfg    | glia maturation factor, gamma                   | 28437447  | 28448233  | TC0700000501.mm.1  | -0.6 | 0.013147 |
| TC0300001236.mm.1 | NCBI_Gene:432702:p | Ighv1-4 | immunoglobulin heavy variable 1-4               | 114487136 | 114487569 | TC1200002600.mm.1  | -1.4 | 0.013161 |
| TC0300001245.mm.1 | NM_001146224       | Dpy30   | dpy-30 homolog (C. elegans)                     | 74299474  | 74323944  | TC1700002534.mm.1  | -0.1 | 0.013164 |
| TC0300001247.mm.1 | NM_013546          | Hebp1   | heme binding protein 1                          | 135137519 | 135168215 | TC0600003314.mm.1  | 0.6  | 0.013216 |
| TC0300001249.mm.1 | NM_010655          | Kpna2   | karyopherin (importin) alpha 2                  | 106988629 | 106999541 | TC1100003941.mm.1  | -0.8 | 0.013223 |
| TC0300001250.mm.1 | NM_027722          | Nudt4   | nudix (nucleoside diphosphate linked moiety X)- | 95547007  | 95564167  | TC1000002729.mm.1  | 0.8  | 0.013231 |
| TC0300001252.mm.1 | ENSMUST00000118590 | Gm14769 | predicted gene 14769                            | 84063333  | 84063764  | TC0X00000819.mm.1  | -0.2 | 0.013247 |
| TC0300001255.mm.1 | NM_011322          | Scn1b   | sodium channel, voltage-gated, type I, beta     | 31116524  | 31127023  | TC0700002791.mm.1  | 0.3  | 0.013258 |
| TC0300001263.mm.1 | ENSMUST00000118636 | Gm6097  | predicted pseudogene 6097                       | 92024567  | 92024911  | TC0300000817.mm.1  | -0.3 | 0.013363 |
| TC0300001287.mm.1 | ENSMUST0000080671  | Gm14173 | predicted gene 14173                            | 156410896 | 156411174 | TC0200004991.mm.1  | -0.6 | 0.013392 |
| TC0300001291.mm.1 | NM_178576          | Cpsf4   | cleavage and polyadenylation specific factor 4  | 145167213 | 145182041 | TC0500001767.mm.1  | -0.3 | 0.013409 |
| TC0300001306.mm.1 | NM_001163522       | Emcn    | endomucin                                       | 137341067 | 137432185 | TC0300001391.mm.1  | 0.7  | 0.01344  |
| TC0300001317.mm.1 | XR_140487          | Gm10115 | predicted gene 10115                            | 6950439   | 6951680   | TC0200002912.mm.1  | 0.5  | 0.013457 |
| TC0300001319.mm.1 | NM_026555          | Rcn3    | reticulocalbin 3, EF-hand calcium binding domai | 45082913  | 45092221  | TC0700000298.mm.1  | 0.4  | 0.013464 |
| TC0300001338.mm.1 | NM_013536          | Emg1    | EMG1 nucleolar protein homolog (S. cerevisiae)  | 124704370 | 124712178 | TC0600003110.mm.1  | -0.3 | 0.013477 |
| TC0300001347.mm.1 | NCBI_Gene:627273:p | Trav7d- | T cell receptor alpha variable 7D-5             | 52835840  | 52836387  | TC1400000633.mm.1  | -0.7 | 0.013497 |
| TC0300001351.mm.1 | NCBI_Gene:667635:p | Trav7n- | Trav7n-5 T cell receptor alpha variable 7N-5    | 53146922  | 53147448  | TC1400000663.mm.1  | -0.7 | 0.013497 |
| TC0300001363.mm.1 | NM_008650          | Mut     | methylmalonyl-Coenzyme A mutase                 | 40934685  | 40961989  | TC1700000819.mm.1  | 0.6  | 0.013516 |
| TC0300001364.mm.1 | NCBI_Gene:10012468 | Trbv20  | T cell receptor beta, variable 20               | 41188273  | 41188977  | TC0600000430.mm.1  | -1.9 | 0.013517 |
| TC0300001365.mm.1 | NM_011016          | Orm2    | orosomucoid 2                                   | 63362449  | 63365878  | TC0400000721.mm.1  | 0.5  | 0.013529 |
| TC0300001378.mm.1 | NM_001204129       | C1qtnf1 | C1q and tumor necrosis factor related protein 1 | 118428203 | 118451782 | TC1100001988.mm.1  | 0.2  | 0.013541 |
| TC0300001390.mm.1 | NM_080289          | Ghrpr   | glyoxylate reductase/hydroxyypyruvate reductase | 44981395  | 44990734  | TC0400000481.mm.1  | 0.3  | 0.01355  |
| TC0300001391.mm.1 | ENSMUST00000085720 | Rpl36-p | ribosomal protein L36, pseudogene 3             | 12911986  | 12912369  | TC0700000106.mm.1  | -0.7 | 0.013564 |
| TC0300001393.mm.1 | NM_001033196       | Znfx1   | zinc finger, NFX1-type containing 1             | 167035793 | 167063015 | TC02000005181.mm.1 | 0.2  | 0.013571 |
| TC0300001395.mm.1 | ENSMUST0000083820  | Gm22723 | predicted gene, 22723                           | 60071058  | 60071186  | TC0600002390.mm.1  | -0.4 | 0.013613 |
| TC0300001396.mm.1 | ENSMUST00000117512 | Gm7222  | predicted gene 7222                             | 134828140 | 134829045 | TC0X00003001.mm.1  | -0.2 | 0.013616 |
| TC0300001409.mm.1 | NM_007713          | Clk3    | CDC-like kinase 3                               | 57750709  | 57765860  | TC0900002380.mm.1  | -0.7 | 0.013635 |
| TC0300001413.mm.1 | ENSMUST00000122076 | Gm14122 | predicted gene 14122                            | 150398256 | 150399399 | TC0200004836.mm.1  | -0.7 | 0.013636 |
| TC0300001416.mm.1 | ENSMUST00000120190 | Gm13991 | predicted gene 13991                            | 116527843 | 116528490 | TC0200004388.mm.1  | 0.3  | 0.013639 |
| TC0300001417.mm.1 | NM_030693          | Atf5    | activating transcription factor 5               | 44812256  | 44816658  | TC0700002974.mm.1  | 0.1  | 0.013644 |
| TC0300001423.mm.1 | NM_009369          | Tgfb1   | transforming growth factor, beta induced        | 56609603  | 56639339  | TC1300000691.mm.1  | 0.5  | 0.01368  |
| TC0300001444.mm.1 | NM_030172          | Efcab11 | EF-hand calcium binding domain 11               | 99693047  | 99883442  | TC1200002213.mm.1  | -0.1 | 0.013699 |
| TC0300001447.mm.1 | NM_172502          | Dcaf15  | DDb1 and CUL4 associated factor 15              | 84097072  | 84104773  | TC0800002569.mm.1  | -0.3 | 0.013745 |
| TC0300001449.mm.1 | NM_028264          | Tmem55a | transmembrane protein 55A                       | 14864076  | 14915262  | TC0400000127.mm.1  | 0.2  | 0.013762 |
| TC0300001451.mm.1 | ENSMUST00000117199 | Rpl9-ps | ribosomal protein L9, pseudogene 1              | 83645046  | 83645621  | TC1100003400.mm.1  | -0.6 | 0.013868 |
| TC0300001453.mm.1 | NM_020509          | Retnla  | resistin like alpha                             | 48842552  | 48844461  | TC1600000698.mm.1  | 1.5  | 0.013912 |
| TC0300001478.mm.1 | NM_026483          | Mphosph | M-phase phosphoprotein 10 (U3 small nucleolar   | 64376541  | 64392268  | TC0700003413.mm.1  | -0.2 | 0.013958 |
| TC0300001486.mm.1 | NM_025286          | Slc31a2 | solute carrier family 31, member 2              | 62262562  | 62298411  | TC0400000696.mm.1  | 0.4  | 0.013971 |
| TC0300001488.mm.1 | NM_026418          | Rgs10   | regulator of G-protein signalling 10            | 128373621 | 128418758 | TC0700004363.mm.1  | -0.2 | 0.013983 |
| TC0300001490.mm.1 | NM_146171          | Ncapd2  | non-SMC condensin I complex, subunit D2         | 125168007 | 125191595 | TC0600003136.mm.1  | -0.9 | 0.014003 |
| TC0300001492.mm.1 | NM_013487          | Cd3d    | CD3 antigen, delta polypeptide                  | 44981786  | 44987052  | TC0900000529.mm.1  | -1.2 | 0.014014 |
| TC0300001493.mm.1 | NM_029983          | Slc2    | Src-like-adaptor 2                              | 156872457 | 156887192 | TC02000005003.mm.1 | -0.8 | 0.014035 |
| TC0300001510.mm.1 | NM_174960          | Gimap9  | GTPase, IMAF family member 9                    | 48676129  | 48679114  | TC0600000565.mm.1  | -0.8 | 0.01404  |
| TC0300001522.mm.1 | ENSMUST00000120629 | Gm6640  | predicted gene 6640                             | 23717169  | 23718755  | TC1600001396.mm.1  | -0.2 | 0.014072 |
| TC0300001540.mm.1 | NM_028626          | Mcee    | methylmalonyl CoA epimerase                     | 64392645  | 64412121  | TC0700000979.mm.1  | 0.5  | 0.014077 |
| TC0300001544.mm.1 | NCBI_Gene:545850:p | Igkv5-4 | immunoglobulin kappa chain variable 5-45        | 69775750  | 69776306  | TC0600003578.mm.1  | -1.2 | 0.014093 |
| TC0300001545.mm.1 | ENSMUST0000050706  | Gm5815  | predicted pseudogene 5815                       | 58593659  | 58594843  | TC1700001038.mm.1  | -1.6 | 0.014115 |
| TC0300001546.mm.1 | BC132145           | Pde8a   | phosphodiesterase 8A                            | 81213596  | 81334533  | TC0700001169.mm.1  | 0.5  | 0.014128 |
| TC0300001548.mm.1 | ENSMUST00000165025 | Traj61  | T cell receptor alpha joining 61                | 54155005  | 54155076  | TC1400000723.mm.1  | -1.1 | 0.014187 |
| TC0300001550.mm.1 | NCBI_Gene:692169:p | Igkv15- | immunoglobulin kappa chain variable 15-103      | 68437468  | 68437925  | TC0600003520.mm.1  | -1.1 | 0.014197 |
| TC0300001556.mm.1 | ENSMUST00000122090 | Gm13169 | predicted gene 13169                            | 146239954 | 146241633 | TC0400001880.mm.1  | 0.6  | 0.014216 |
| TC0300001558.mm.1 | NM_001113356       | C1rb    | complement component 1, r subcomponent B        | 124570294 | 124581171 | TC0600001424.mm.1  | 0.7  | 0.014221 |
| TC0300001570.mm.1 | NM_001160400       | Megf8   | multiple EGF-like-domains 8                     | 25317164  | 25365917  | TC0700000413.mm.1  | 0.1  | 0.014259 |
| TC0300001574.mm.1 | NM_025364          | Sarmp   | SAP domain containing ribonucleoprotein         | 128821771 | 128877638 | TC1000001624.mm.1  | -0.4 | 0.014277 |
| TC0300001575.mm.1 | NM_001081161       | Fam171a | family with sequence similarity 171, member A1  | 3114224   | 3227809   | TC0200000002.mm.1  | 0.3  | 0.01428  |
| TC0300001577.mm.1 | NM_013825          | Ly75    | lymphocyte antigen 75                           | 60292103  | 60383303  | TC0200003601.mm.1  | -1.2 | 0.01431  |
| TC0300001578.mm.1 | XM_001003873       | Gm9386  | predicted pseudogene 9386                       | 80938184  | 80938714  | TC17000002594.mm.1 | -0.5 | 0.014317 |
| TC0300001581.mm.1 | NCBI_Gene:10012467 | Trbv12- | T cell receptor beta, variable 12-2             | 41118864  | 41119368  | TC0600003497.mm.1  | -1.7 | 0.01432  |
| TC0300001587.mm.1 | NM_001130459       | Tcn2    | transcobalamin 2                                | 3917077   | 3932159   | TC1100002103.mm.1  | 0.8  | 0.014334 |
| TC0300001591.mm.1 | uc007pum.1         | Gm9998  | SubName: Full=Histone protein Hist1h1e;         | 23684232  | 23684612  | TC1300001639.mm.1  | -1.8 | 0.014367 |

|                   |                    |                                    |                                                 |           |           |                    |      |          |
|-------------------|--------------------|------------------------------------|-------------------------------------------------|-----------|-----------|--------------------|------|----------|
| TC0300001597.mm.1 | ENSMUST00000029124 | Gm9826                             | predicted gene 9826                             | 7177739   | 7179037   | TC0100000030.mm.1  | -0.3 | 0.014416 |
| TC0300001604.mm.1 | NR_034052          | Snora2b                            | small nucleolar RNA, H/ACA box 2B               | 98526346  | 98526482  | TC1500002179.mm.1  | -0.9 | 0.014452 |
| TC0300001605.mm.1 | NM_010022          | Dbt                                | dihydrolipoamide branched chain transacylase E  | 116513070 | 116549981 | TC0300001192.mm.1  | 0.6  | 0.014464 |
| TC0300001606.mm.1 | XM_980604          | Gm7866                             | predicted gene 7866                             | 72174579  | 72196843  | TC0900002630.mm.1  | -0.2 | 0.014489 |
| TC0300001614.mm.1 | ENSMUST00000071458 | Gm4968                             | predicted gene 4968                             | 127233756 | 127234619 | TC0600001480.mm.1  | -0.5 | 0.01452  |
| TC0300001615.mm.1 | NM_029576          | Rab1b                              | RAB1B, member RAS oncogene family               | 5099205   | 5106996   | TC1900000952.mm.1  | 0.5  | 0.014525 |
| TC0300001616.mm.1 | BC057341           | Rasgrp1                            | RAS guanyl releasing protein 1                  | 117279993 | 117343001 | TC0200004396.mm.1  | -1.5 | 0.014567 |
| TC0300001622.mm.1 | NM_009281          | Zfp143                             | zinc finger protein 143                         | 110061702 | 110095394 | TC0700001623.mm.1  | -0.5 | 0.014612 |
| TC0300001626.mm.1 | XM_887972          | Gm6436                             | predicted gene 6436                             | 61710582  | 61714802  | TC1300002154.mm.1  | -0.3 | 0.014624 |
| TC0300001632.mm.1 | NM_177698          | Psds3                              | pleckstrin and Sec7 domain containing 3 (Psd3), | 67689082  | 68062286  | TC0800002339.mm.1  | 0.2  | 0.014626 |
| TC0300001639.mm.1 | ENSMUST00000118846 | Csnk2a1                            | casein kinase 2, alpha 1, pseudogene            | 16610252  | 16611426  | TC0X00000180.mm.1  | -0.2 | 0.014632 |
| TC0300001643.mm.1 | NM_183287          | 2610318 RIKEN cDNA 2610318N02 gene |                                                 | 17113398  | 17125106  | TC1600001277.mm.1  | -0.6 | 0.014638 |
| TC0300001644.mm.1 | XM_001474178       | Gm2573                             | predicted gene 2573                             | 12181147  | 12181467  | TC150000102.mm.1   | 0.6  | 0.014666 |
| TC0300001647.mm.1 | BC023893           | Crelid1                            | cysteine-rich with EGF-like domains 1           | 113483297 | 113493341 | TC0600001253.mm.1  | 0.1  | 0.014681 |
| TC0300001653.mm.1 | NM_029634          | Ip6k2                              | inositol hexaphosphate kinase 2                 | 108783796 | 108806333 | TC0900001422.mm.1  | -0.2 | 0.014683 |
| TC0300001654.mm.1 | ENSMUST00000083713 | Gm25896                            | predicted gene, 25896                           | 87418909  | 87419044  | TC1600001984.mm.1  | -1.2 | 0.014705 |
| TC0300001663.mm.1 | ENSMUST00000179601 | Rpl36-p                            | ribosomal protein L36, pseudogene 4             | 87920977  | 87921393  | TC1700001314.mm.1  | -0.2 | 0.014743 |
| TC0300001664.mm.1 | NM_016966          | Phgdh                              | 3-phosphoglycerate dehydrogenase                | 98313170  | 98339990  | TC0300002549.mm.1  | 0.6  | 0.01475  |
| TC0300001665.mm.1 | ENSMUST00000171339 | Gm17430                            | predicted gene, 17430                           | 9726197   | 9726670   | TC1800000965.mm.1  | -0.5 | 0.014788 |
| TC0300001666.mm.1 | NM_028979          | Cyp2j9                             | cytochrome P450, family 2, subfamily j, polypep | 96568429  | 96591578  | TC0400003100.mm.1  | 0.4  | 0.014807 |
| TC0300001674.mm.1 | NM_026496          | Grlh2                              | grainyhead-like 2 (Drosophila)                  | 37233036  | 37363569  | TC1500000278.mm.1  | -0.1 | 0.014824 |
| TC0300001679.mm.1 | NM_028133          | Egln3                              | EGL nine homolog 3 (C. elegans)                 | 54178981  | 54203874  | TC1200001742.mm.1  | -0.3 | 0.014833 |
| TC0300001681.mm.1 | ENSMUST00000178840 | Tes3-ps                            | testis derived transcript 3, pseudogene         | 49493615  | 49494819  | TC1300000564.mm.1  | -0.5 | 0.014836 |
| TC0300001689.mm.1 | ENSMUST00000084908 | Gm12918                            | predicted gene 12918                            | 10848403  | 10849093  | TC0400000075.mm.1  | -0.9 | 0.014848 |
| TC0300001690.mm.1 | XM_001480180       | Gm15583                            | predicted gene 15583                            | 146725581 | 146729490 | TC0100001332.mm.1  | -0.8 | 0.014862 |
| TC0300001701.mm.1 | ENSMUST00000121487 | Gm11604                            | predicted gene 11604                            | 98185366  | 98186107  | TC1100001559.mm.1  | -0.8 | 0.014877 |
| TC0300001704.mm.1 | NM_001254735       | BC01764                            | cDNA sequence BC017643                          | 121222588 | 121229322 | TC1100004249.mm.1  | -0.2 | 0.014918 |
| TC0300001708.mm.1 | ENSMUST00000119247 | Gm15653                            | predicted gene 15653                            | 73476444  | 73477353  | TC0500002593.mm.1  | -0.4 | 0.014952 |
| TC0300001717.mm.1 | NM_001146117       | Smim19                             | small integral membrane protein 19              | 22462614  | 22476879  | TC0800001870.mm.1  | 0.3  | 0.014953 |
| TC0300001725.mm.1 | ENSMUST00000120046 | Gm5942                             | predicted gene 5942                             | 114774319 | 114774757 | TC0X00002887.mm.1  | -0.3 | 0.014987 |
| TC0300001755.mm.1 | ENSMUST00000075898 | Gm5921                             | predicted gene 5921                             | 115437700 | 115438581 | TC0900003189.mm.1  | -0.3 | 0.015036 |
| TC0300001763.mm.1 | ENSMUST00000082738 | Gm22806                            | predicted gene, 22806                           | 51648199  | 51648334  | TC1300000601.mm.1  | -1.7 | 0.015045 |
| TC0300001765.mm.1 | NM_009084          | Rpl37a                             | ribosomal protein L37a                          | 72711260  | 72713813  | TC0100000609.mm.1  | -0.4 | 0.015046 |
| TC0300001769.mm.1 | ENSMUST00000157629 | Gm24289                            | predicted gene, 24289                           | 64295931  | 64296065  | TC0900000820.mm.1  | -1.3 | 0.015049 |
| TC0300001786.mm.1 | NM_025280          | Kin                                | antigenic determinant of rec-A protein          | 10080593  | 10092806  | TC0200000082.mm.1  | -0.2 | 0.015075 |
| TC0300001800.mm.1 | NM_028245          | Zfp131                             | zinc finger protein 131                         | 119765187 | 119791107 | TC1300002748.mm.1  | -0.2 | 0.01508  |
| TC0300001804.mm.1 | ENSMUST00000081138 | Gm6984                             | predicted gene 6984                             | 73953922  | 73955586  | TC1400002400.mm.1  | -0.8 | 0.01513  |
| TC0300001810.mm.1 | ENSMUST00000122418 | Gm14323                            | predicted gene 14323                            | 177892638 | 177893264 | TC0200002752.mm.1  | -1.0 | 0.015159 |
| TC0300001811.mm.1 | NM_021391          | Ppp1r1a                            | protein phosphatase 1, regulatory (inhibitor) s | 103530279 | 103537992 | TC1500002323.mm.1  | 0.5  | 0.015179 |
| TC0300001818.mm.1 | ENSMUST00000104605 | Gm25565                            | predicted gene, 25565                           | 1308273   | 1308377   | TC0Y00000237.mm.1  | 0.1  | 0.015274 |
| TC0300001820.mm.1 | NM_026479          | Zcchc10                            | zinc finger, CCHC domain containing 10          | 53324679  | 53333301  | TC1100000600.mm.1  | -0.1 | 0.015305 |
| TC0300001850.mm.1 | NM_027139          | Taf9                               | TAF9 RNA polymerase II, TATA box binding prote  | 100651343 | 100666415 | TC1300001139.mm.1  | -0.3 | 0.015308 |
| TC0300001855.mm.1 | ENSMUST00000178641 | Gm17535                            | predicted gene, 17535                           | 3034599   | 3035805   | TC0900000007.mm.1  | 0.9  | 0.015337 |
| TC0300001868.mm.1 | ENSMUST00000051629 | Gm6960                             | predicted pseudogene 6960                       | 60426292  | 60426934  | TC1800000611.mm.1  | -0.5 | 0.015352 |
| TC0300001869.mm.1 | NM_001163379       | Agpat1                             | 1-acylglycerol-3-phosphate O-acyltransferase 1  | 34604262  | 34613449  | TC1700000639.mm.1  | 0.2  | 0.015352 |
| TC0300001871.mm.1 | NCBI_Gene:10012439 | Traj3                              | T cell receptor alpha joining 3                 | 54217292  | 54217357  | TC1400000738.mm.1  | -0.4 | 0.015369 |
| TC0300001874.mm.1 | NM_028370          | Pot1b                              | protection of telomeres 1B                      | 55652025  | 55712628  | TC1700002298.mm.1  | -0.2 | 0.015374 |
| TC0300001882.mm.1 | NM_001081306       | Ptptr2                             | protein tyrosine phosphatase, receptor type Z,  | 22875502  | 23052916  | TC0600000193.mm.1  | -0.3 | 0.015389 |
| TC0300001883.mm.1 | ENSMUST00000121757 | Gm13294                            | predicted gene 13294                            | 11099788  | 11100264  | TC0200002952.mm.1  | -0.4 | 0.015399 |
| TC0300001892.mm.1 | NM_013471          | Anxa4                              | annexin A4                                      | 86736840  | 86793584  | TC0600002644.mm.1  | 0.5  | 0.015399 |
| TC0300001894.mm.1 | NM_009994          | Cyp1b1                             | cytochrome P450, family 1, subfamily b, polypep | 79706894  | 79715041  | TC1700002571.mm.1  | 0.4  | 0.01542  |
| TC0300001903.mm.1 | NM_009321          | Tbca                               | tubulin cofactor A                              | 94788920  | 94842923  | TC1300001066.mm.1  | -0.4 | 0.015423 |
| TC0300001906.mm.1 | ENSMUST00000161469 | Gm16379                            | predicted pseudogene 16379                      | 14845365  | 14845712  | TC0900001778.mm.1  | -0.6 | 0.015433 |
| TC0300001909.mm.1 | NM_080635          | Eif3h                              | eukaryotic translation initiation factor 3, sub | 51786558  | 51865483  | TC1500001504.mm.1  | -0.8 | 0.015446 |
| TC0300001913.mm.1 | ENSMUST00000117629 | Gm15175                            | predicted gene 15175                            | 157604351 | 157604482 | TC0X00001599.mm.1  | -0.3 | 0.015489 |
| TC0300001924.mm.1 | NM_025846          | Rras2                              | related RAS viral (r-ras) oncogene homolog 2    | 114046782 | 114117781 | TC07000004132.mm.1 | -0.2 | 0.015515 |
| TC0300001927.mm.1 | NM_011874          | Psmc4                              | proteasome (prosome, macropain) 26S subunit,    | 28041702  | 28050101  | TC0700002685.mm.1  | -0.4 | 0.015548 |
| TC0300001975.mm.1 | ENSMUST00000117202 | Gm13301                            | predicted gene 13301                            | 42240639  | 42242685  | TC0400000401.mm.1  | 0.4  | 0.015575 |
| TC0300001979.mm.1 | NM_145073          | Hist1h3                            | histone cluster 1, H3g                          | 23535418  | 23535951  | TC1300000246.mm.1  | -0.5 | 0.015576 |
| TC0300001986.mm.1 | NM_008990          | Pvrl2                              | poliovirus receptor-related 2                   | 19716644  | 19749573  | TC0700002499.mm.1  | 0.1  | 0.015588 |
| TC0300001990.mm.1 | ENSMUST00000102181 | Gm24276                            | predicted gene, 24276                           | 8816138   | 8816247   | TC0100000034.mm.1  | -0.5 | 0.015623 |
| TC0300001993.mm.1 | ENSMUST00000119850 | Gm12917                            | predicted gene 12917                            | 124718999 | 124719637 | TC0400001422.mm.1  | -0.1 | 0.015643 |
| TC0300001996.mm.1 | NM_001033266       | Gm525                              | predicted gene 525                              | 89073841  | 89093064  | TC1100001389.mm.1  | -0.3 | 0.015661 |
| TC0300002007.mm.1 | NM_027860          | 610010 RIKEN cDNA 0610010F05 gene  |                                                 | 23564961  | 23633639  | TC1100002369.mm.1  | 0.3  | 0.015661 |
| TC0300002021.mm.1 | NM_013456          | Actn3                              | actinin alpha 3                                 | 4861216   | 4877909   | TC1900000939.mm.1  | -0.2 | 0.015665 |
| TC0300002023.mm.1 | NM_001164156       | Mcrs1                              | microspherule protein 1                         | 99242817  | 99251961  | TC1500002206.mm.1  | -0.3 | 0.015697 |
| TC0300002025.mm.1 | NR_110499          | Rpl14-p                            | ribosomal protein L14, pseudogene 1 (Rpl14-ps1  | 0         | 0         | TSUnmapped0000008  | -0.8 | 0.015706 |
| TC0300002030.mm.1 | ENSMUST00000120823 | Prkaca                             | protein kinase, cAMP dependent, catalytic, alph | 161485567 | 161486485 | TC0X000003283.mm.1 | 0.2  | 0.015731 |
| TC0300002035.mm.1 | ENSMUST00000052882 | Gm6863                             | predicted gene 6863                             | 96922420  | 96923061  | TC1200002173.mm.1  | -0.7 | 0.015755 |
| TC0300002036.mm.1 | NM_029415          | Slc10a6                            | solute carrier family 10 (sodium/bile acid cotr | 103605711 | 103629403 | TC0500002875.mm.1  | 0.2  | 0.015792 |
| TC0300002040.mm.1 | NM_144535          | Ap5m1                              | adaptor-related protein complex 5, mu 1 subuni  | 49066495  | 49087723  | TC1400000541.mm.1  | -0.2 | 0.015814 |
| TC0300002041.mm.1 | NR_040420          | Gm6568                             | DnaI (Hsp40) homolog, subfamily B, member 9 p   | 157540685 | 157541782 | TC0X00001598.mm.1  | 0.2  | 0.015852 |
| TC0300002042.mm.1 | ENSMUST00000184890 | RP24-37                            | N/A                                             | 7193548   | 7194172   | TC0600001837.mm.1  | -0.3 | 0.015863 |
| TC0300002053.mm.1 | NM_011281          | Rorc                               | RAR-related orphan receptor gamma               | 94372794  | 94398276  | TC0300000864.mm.1  | -0.9 | 0.015885 |
| TC0300002056.mm.1 | NCBI_Gene:328482:p | Trav9d                             | Trav9d-2 T cell receptor alpha variable 9D-2    | 52892018  | 52892708  | TC1400002800.mm.1  | -0.7 | 0.015964 |
| TC0300002060.mm.1 | NM_178195          | Hist1h2                            | histone cluster 1, H2bf                         | 23573736  | 23574196  | TC1300001635.mm.1  | -1.1 | 0.015989 |
| TC0300002065.mm.1 | NM_013868          | Hspb7                              | heat shock protein family, member 7 (cardiovasc | 141420779 | 141425311 | TC0400001790.mm.1  | 1.0  | 0.01601  |
| TC0300002074.mm.1 | ENSMUST00000099049 | Gm10719                            | predicted gene 10719 // predicted gene 11167    | 3017408   | 3021593   | TC0900000005.mm.1  | 0.8  | 0.016014 |

|                   |                    |         |                                                 |           |           |                    |      |          |
|-------------------|--------------------|---------|-------------------------------------------------|-----------|-----------|--------------------|------|----------|
| TC0300002081.mm.1 | NM_027494          | Zcchc8  | zinc finger, CCHC domain containing 8           | 123698302 | 123721044 | TC0500003240.mm.1  | -0.6 | 0.01604  |
| TC0300002090.mm.1 | NM_011865          | Pcbp1   | poly(rC) binding protein 1                      | 86524492  | 86526321  | TC0600002639.mm.1  | -0.2 | 0.016058 |
| TC0300002091.mm.1 | ENSMUST00000118025 | Gm15766 | predicted gene 15766                            | 147271837 | 147272649 | TC0600001747.mm.1  | -0.4 | 0.016065 |
| TC0300002100.mm.1 | ENSMUST00000167829 | Traj36  | T cell receptor alpha joining 36                | 54182402  | 54182464  | TC1400000732.mm.1  | -0.8 | 0.016092 |
| TC0300002105.mm.1 | NM_001081020       | Adamts6 | a disintegrin-like and metallopeptidase (reprol | 104287873 | 104494763 | TC1300001173.mm.1  | -0.2 | 0.016174 |
| TC0300002112.mm.1 | XM_003688789       | Gm21104 | predicted gene, 21104                           | 42070962  | 42073398  | TC0400002489.mm.1  | -0.1 | 0.0162   |
| TC0300002113.mm.1 | NM_025661          | Ormdl3  | ORM1-like 3 (S. cerevisiae)                     | 98581256  | 98587368  | TC1100003683.mm.1  | 0.3  | 0.016202 |
| TC0300002114.mm.1 | ENSMUST00000082943 | Gm23377 | predicted gene, 23377                           | 110121680 | 110121805 | TC0900003103.mm.1  | -0.3 | 0.016242 |
| TC0300002118.mm.1 | NCBI_Gene:636127:p | Trav7n  | T cell receptor alpha variable 7N-4             | 53091239  | 53091875  | TC1400002810.mm.1  | -0.6 | 0.016267 |
| TC0300002124.mm.1 | ENSMUST00000086918 | Gm5560  | predicted pseudogene 5560                       | 97264828  | 97265719  | TC0500000938.mm.1  | -0.6 | 0.016304 |
| TC0300002125.mm.1 | NM_008873          | Plau    | plasminogen activator, urokinase                | 20836662  | 20843388  | TC1400000176.mm.1  | 0.8  | 0.016311 |
| TC0300002134.mm.1 | NM_012053          | Rpl8    | ribosomal protein L8                            | 76904071  | 76906318  | TC1500000614.mm.1  | -0.7 | 0.016357 |
| TC0300002138.mm.1 | NM_013470          | Anxa3   | annexin A3                                      | 96793385  | 96845968  | TC0500000928.mm.1  | 0.5  | 0.016363 |
| TC0300002139.mm.1 | NM_011232          | Rad1    | RAD1 homolog (S. pombe)                         | 10486018  | 10499063  | TC1500000081.mm.1  | -0.1 | 0.016469 |
| TC0300002143.mm.1 | ENSMUST00000120546 | Gm12686 | predicted gene 12686                            | 99418773  | 99419169  | TC0400001002.mm.1  | -0.3 | 0.016482 |
| TC0300002150.mm.1 | ENSMUST00000181797 | Gm3466  | predicted gene 3466                             | 6690690   | 6691881   | TC1400000063.mm.1  | -0.3 | 0.016483 |
| TC0300002161.mm.1 | ENSMUST00000171235 | Gm5459  | predicted gene 5459                             | 31076635  | 31077447  | TC1400001668.mm.1  | -0.9 | 0.016483 |
| TC0300002176.mm.1 | ENSMUST00000080062 | Gm17541 | predicted gene, 17541                           | 4689402   | 4689926   | TC1200001361.mm.1  | -0.7 | 0.016485 |
| TC0300002182.mm.1 | NM_008640          | Laptm4a | lysosomal-associated protein transmembrane 4/   | 8921307   | 8938742   | TC1200000071.mm.1  | 0.4  | 0.016489 |
| TC0300002203.mm.1 | NR_046364          | Map1lc3 | microtubule-associated protein 1 light chain 3  | 155276297 | 155278073 | TC0200002363.mm.1  | 0.1  | 0.016489 |
| TC0300002219.mm.1 | ENSMUST00000121665 | Gm13440 | predicted gene 13440                            | 36909095  | 36909590  | TC0200000674.mm.1  | -0.4 | 0.016561 |
| TC0300002220.mm.1 | NM_024446          | Nudt7   | nudix (nucleoside diphosphate linked moiety X)- | 114133557 | 114152312 | TC0800001358.mm.1  | 0.3  | 0.016618 |
| TC0300002230.mm.1 | XR_141348          | Gm10554 | predicted gene 10554                            | 9879895   | 9882639   | TC1800000069.mm.1  | 0.3  | 0.016621 |
| TC0300002236.mm.1 | NM_177816          | Sh2d4b  | SH2 domain containing 4B                        | 40813789  | 40893266  | TC1400001779.mm.1  | -0.2 | 0.01665  |
| TC0300002241.mm.1 | NM_008903          | Ppap2a  | phosphatidic acid phosphatase type 2A           | 112800777 | 112867894 | TC1300001270.mm.1  | 0.4  | 0.016659 |
| TC0300002257.mm.1 | ENSMUST00000120290 | Gm6142  | predicted pseudogene 6142                       | 4320356   | 4320680   | TC1600001125.mm.1  | -0.5 | 0.016668 |
| TC0300002259.mm.1 | NM_021606          | Nek6    | NIMA (never in mitosis gene a)-related expresse | 38511643  | 38588041  | TC0200000702.mm.1  | 0.4  | 0.016728 |
| TC0300002263.mm.1 | NM_146144          | Usp1    | ubiquitin specific peptidase 1                  | 98923810  | 98935543  | TC0400000992.mm.1  | -0.5 | 0.016753 |
| TC0300002264.mm.1 | NM_026121          | Bag4    | BCL2-associated athanogene 4                    | 25764538  | 25785287  | TC0800001919.mm.1  | 0.2  | 0.016788 |
| TC0300002265.mm.1 | NM_177583          | Aph1b   | anterior pharynx defective 1b homolog (C. elega | 66775202  | 66795490  | TC0900002529.mm.1  | 0.2  | 0.016818 |
| TC0300002266.mm.1 | ENSMUST00000082925 | Gm24524 | predicted gene, 24524                           | 86079766  | 86079935  | TC0500000786.mm.1  | -0.4 | 0.01683  |
| TC0300002269.mm.1 | ENSMUST00000116908 | Gm22091 | predicted gene, 22091                           | 10508453  | 10508579  | TC0200000183.mm.1  | -0.2 | 0.016846 |
| TC0300002273.mm.1 | ENSMUST00000098496 | BC00718 | cDNA sequence BC007180                          | 154762157 | 154767787 | TC0300001556.mm.1  | -0.2 | 0.016858 |
| TC0300002277.mm.1 | NM_016770          | Folh1   | folate hydrolase 1                              | 86718976  | 86775864  | TC0700003699.mm.1  | 0.9  | 0.016948 |
| TC0300002282.mm.1 | NM_025821          | Carhsp1 | calcium regulated heat stable protein 1         | 8658580   | 8672153   | TC1600001177.mm.1  | 0.6  | 0.016982 |
| TC0300002284.mm.1 | ENSMUST00000120076 | Gm8806  | predicted gene 8806                             | 80533745  | 80535151  | TC0X00002535.mm.1  | -0.7 | 0.016984 |
| TC0300002289.mm.1 | NM_001168577       | Nat2    | N-acetyltransferase 2 (arylamine N-acetyltransf | 67494867  | 67502580  | TC0800000694.mm.1  | -0.2 | 0.017007 |
| TC0300002292.mm.1 | NM_011239          | Ranbp1  | RAN binding protein 1                           | 18239784  | 18248732  | TC1600001308.mm.1  | -0.2 | 0.017017 |
| TC0300002297.mm.1 | NM_010027          | Ddt     | D-dopachrome tautomerase                        | 75771225  | 75773414  | TC1000003225.mm.1  | 0.3  | 0.017109 |
| TC0300002300.mm.1 | NM_011195          | Ptcra   | pre T cell antigen receptor alpha               | 46755663  | 46763712  | TC1700002190.mm.1  | -0.5 | 0.017123 |
| TC0300002303.mm.1 | ENSMUST00000099050 | Gm10720 | predicted gene 10720                            | 3015654   | 3017210   | TC0900000004.mm.1  | 0.9  | 0.017157 |
| TC0300002310.mm.1 | ENSMUST00000164712 | Gm17149 | predicted gene 17149                            | 18656615  | 18656989  | TC0800001796.mm.1  | -0.7 | 0.017179 |
| TC0300002311.mm.1 | NM_025943          | Dzip1   | DAZ interacting protein 1                       | 118875520 | 118925387 | TC1400002719.mm.1  | -0.3 | 0.01718  |
| TC0300002316.mm.1 | ENSMUST00000118718 | Gm15464 | predicted gene 15464                            | 60117252  | 60117685  | TC0100000466.mm.1  | -0.6 | 0.017182 |
| TC0300002318.mm.1 | NM_011693          | Vcam1   | vascular cell adhesion molecule 1               | 116109949 | 116129688 | TC0300002802.mm.1  | -0.9 | 0.017298 |
| TC0300002319.mm.1 | NM_030215          | Wrip1   | Werner helicase interacting protein 1           | 32802030  | 32822610  | TC1300000359.mm.1  | -0.2 | 0.017305 |
| TC0300002332.mm.1 | ENSMUST00000121232 | Gm9430  | predicted gene 9430                             | 8662302   | 8663828   | TC0X00001805.mm.1  | -0.4 | 0.017324 |
| TC0300002333.mm.1 | NM_013550          | Hist1h3 | histone cluster 1, H3a                          | 23761853  | 23762386  | TC1300001646.mm.1  | -0.9 | 0.017342 |
| TC0300002334.mm.1 | ENSMUST00000078034 | Rpl9-ps | ribosomal protein L9, pseudogene 6              | 32465885  | 32466575  | TC1900001395.mm.1  | -0.7 | 0.01735  |
| TC0300002335.mm.1 | NM_153407          | Csrnp2  | cysteine-serine-rich nuclear protein 2          | 100479570 | 100495239 | TC1500002240.mm.1  | -0.2 | 0.01735  |
| TC0300002339.mm.1 | NM_009345          | Dntt    | deoxynucleotidyltransferase, terminal           | 41029275  | 41059525  | TC1900000583.mm.1  | -2.1 | 0.017479 |
| TC0300002341.mm.1 | NCBI_Gene:547428:p | Trav19  | Trav19 T cell receptor alpha variable 19        | 53845234  | 53845831  | TC1400000711.mm.1  | -0.2 | 0.017535 |
| TC0300002344.mm.1 | NM_027975          | Fam83d  | family with sequence similarity 83, member D    | 158768093 | 158786637 | TC0200002442.mm.1  | -0.3 | 0.017569 |
| TC0300002346.mm.1 | NR_033581          | Adh6-ps | alcohol dehydrogenase 6 (class V), pseudogene 1 | 138374121 | 138388291 | TC0300001413.mm.1  | 0.2  | 0.017626 |
| TC0300002347.mm.1 | ENSMUST00000181818 | Kansl2- | KAT8-regulatory NSL complex subunit 2, pseudo   | 72672818  | 72674278  | TC0700001056.mm.1  | -0.4 | 0.017628 |
| TC0300002351.mm.1 | NM_178113          | Ncapd3  | non-SMC condensin II complex, subunit D3        | 27030175  | 27095315  | TC0900000255.mm.1  | -0.7 | 0.017646 |
| TC0300002352.mm.1 | ENSMUST00000179442 | Gm21896 | predicted gene, 21896                           | 35235411  | 35236037  | TC0Y00000110.mm.1  | 0.2  | 0.017679 |
| TC0300002357.mm.1 | ENSMUST00000118618 | Gm5638  | predicted gene 5638                             | 68629428  | 68630685  | TC0X00000611.mm.1  | -0.2 | 0.017706 |
| TC0300002359.mm.1 | ENSMUST00000098952 | Gm10704 | predicted pseudogene 10704                      | 88576245  | 88577208  | TC0300002318.mm.1  | -0.5 | 0.017728 |
| TC0300002362.mm.1 | ENSMUST00000158177 | Gm24073 | predicted gene, 24073                           | 114980428 | 114980533 | TC1400002700.mm.1  | 0.3  | 0.017774 |
| TC0300002363.mm.1 | uc012ekq.2         | TCRB    | clone 114908252830411G T-cell receptor beta cl  | 41139322  | 41533910  | TC0600002151.mm.1  | -1.3 | 0.017806 |
| TC0300002370.mm.1 | NM_177372          | Dna2    | DNA replication helicase 2 homolog (yeast)      | 62947026  | 62974188  | TC1000000592.mm.1  | -0.2 | 0.017824 |
| TC0300002373.mm.1 | ENSMUST00000177265 | Gm5777  | predicted gene 5777                             | 57782354  | 57782801  | TC1000000507.mm.1  | -0.4 | 0.017842 |
| TC0300002374.mm.1 | ENSMUST00000168310 | Igkv17- | immunoglobulin kappa chain variable 17-134      | 67720729  | 67721225  | TC0600002430.mm.1  | -0.2 | 0.017858 |
| TC0300002375.mm.1 | ENSMUST00000122052 | Gm12785 | predicted gene 12785                            | 101210416 | 101210587 | TC04000003153.mm.1 | -0.3 | 0.017866 |
| TC0300002376.mm.1 | BC139809           | Hist1h4 | histone cluster 1, H4c                          | 23698060  | 23698454  | TC1300001640.mm.1  | -1.3 | 0.017901 |
| TC0300002381.mm.1 | ENSMUST00000175037 | Gm26199 | predicted gene, 26199                           | 82317222  | 82317303  | TC1500000749.mm.1  | 0.5  | 0.017936 |
| TC0300002382.mm.1 | NM_001001186       | Zfp456  | zinc finger protein 456                         | 67362113  | 67375810  | TC1300002774.mm.1  | -0.2 | 0.017952 |
| TC0300002390.mm.1 | NM_015829          | Slc25a1 | solute carrier family 25 (mitochondrial carrier | 6041218   | 6217173   | TC0600001813.mm.1  | -0.3 | 0.018013 |
| TC0300002391.mm.1 | NCBI_Gene:667435:p | Igkv17- | immunoglobulin kappa chain variable 17-121      | 68036818  | 68037318  | TC06000003514.mm.1 | -1.2 | 0.018016 |
| TC0300002394.mm.1 | NM_134138          | Psmg2   | proteasome (prosome, macropain) assembly ch     | 67641599  | 67654162  | TC1800000708.mm.1  | -0.3 | 0.018034 |
| TC0300002402.mm.1 | ENSMUST00000118899 | Gm4991  | predicted gene 4991                             | 109910221 | 109911772 | TC0X00001106.mm.1  | -0.3 | 0.018035 |
| TC0300002403.mm.1 | NM_008798          | Pdcd1   | programmed cell death 1                         | 94038305  | 94052553  | TC0100002840.mm.1  | -0.3 | 0.018054 |
| TC0300002416.mm.1 | NM_008859          | Prkcg   | protein kinase C, theta                         | 11172113  | 11301226  | TC0200000211.mm.1  | -0.8 | 0.018087 |
| TC0300002417.mm.1 | NM_015767          | Ttpa    | tocopherol (alpha) transfer protein             | 20007938  | 20030785  | TC0400000168.mm.1  | 0.1  | 0.018095 |
| TC0300002421.mm.1 | NM_001166432       | Hnrnpf  | heterogeneous nuclear ribonucleoprotein F       | 117900324 | 117925622 | TC0600001322.mm.1  | -0.4 | 0.018104 |
| TC0300002434.mm.1 | NM_016928          | Tlr5    | toll-like receptor 5                            | 182954788 | 182976044 | TC0100001754.mm.1  | 0.3  | 0.018107 |
| TC0300002451.mm.1 | NM_207022          | Tas2r11 | taste receptor, type 2, member 118              | 23969161  | 23970060  | TC0600001938.mm.1  | 0.2  | 0.018198 |

|                   |                    |         |                                                 |           |           |                    |      |          |
|-------------------|--------------------|---------|-------------------------------------------------|-----------|-----------|--------------------|------|----------|
| TC0300002452.mm.1 | NM_175668          | Gpr4    | G protein-coupled receptor 4                    | 19212538  | 19224176  | TC0700000292.mm.1  | 0.2  | 0.018206 |
| TC0300002453.mm.1 | ENSMUST00000101994 | Gm24539 | predicted gene, 24539                           | 62136930  | 62137062  | TC1300000751.mm.1  | -0.4 | 0.018238 |
| TC0300002460.mm.1 | ENSMUST00000177835 | Gm24315 | predicted gene, 24315                           | 10480165  | 10480291  | TC0200000118.mm.1  | -0.3 | 0.018252 |
| TC0300002464.mm.1 | NM_177870          | Slc5a6  | solute carrier family 5 (sodium-dependent vitam | 31036036  | 31048924  | TC05000002170.mm.1 | 0.1  | 0.018303 |
| TC0300002467.mm.1 | NM_016792          | Txn1l   | thioredoxin-like 1                              | 63662801  | 63692386  | TC1800001453.mm.1  | -0.3 | 0.01831  |
| TC0300002470.mm.1 | NM_008741          | Nsg2    | neuron specific gene family member 2            | 32000459  | 32059202  | TC1100000327.mm.1  | -0.9 | 0.018325 |
| TC0300002473.mm.1 | NM_019398          | Ear5    | eosinophil-associated, ribonuclease A family, m | 51162260  | 51163018  | TC1400000581.mm.1  | 0.2  | 0.018326 |
| TC0300002475.mm.1 | NCBI_Gene:10012646 | Trav13- | T cell receptor alpha variable 13-1             | 53545014  | 53545525  | TC1400002816.mm.1  | -0.4 | 0.018372 |
| TC0300002479.mm.1 | ENSMUST00000180094 | Gm26060 | predicted gene, 26060                           | 10486946  | 10487068  | TC0200000134.mm.1  | -0.2 | 0.01839  |
| TC0300002483.mm.1 | ENSMUST00000177866 | Gm26426 | predicted gene, 26426                           | 10494321  | 10494443  | TC0200000152.mm.1  | -0.2 | 0.01839  |
| TC0300002487.mm.1 | NM_011594          | Timp2   | tissue inhibitor of metalloproteinase 2         | 118301061 | 118355740 | TC11000004157.mm.1 | 0.7  | 0.018457 |
| TC0300002490.mm.1 | ENSMUST00000118044 | Gm12699 | predicted gene 12699                            | 100567108 | 100568048 | TC0400003146.mm.1  | 0.6  | 0.018461 |
| TC0300002492.mm.1 | NM_001168578       | Tceal8  | transcription elongation factor A (SII)-like 8  | 136168984 | 136172342 | TC0X00003051.mm.1  | 0.2  | 0.018461 |
| TC0300002499.mm.1 | NM_008459          | Klra10  | killer cell lectin-like receptor subfamily A, m | 130269194 | 130281928 | TC0600003612.mm.1  | -0.3 | 0.018468 |
| TC0300002500.mm.1 | NM_028060          | Slc35f2 | solute carrier family 35, member F2             | 53771535  | 53818161  | TC0900000647.mm.1  | -0.2 | 0.018507 |
| TC0300002501.mm.1 | NCBI_Gene:10012468 | Trbv15  | T cell receptor beta, variable 16               | 41151174  | 41152230  | TC0600000428.mm.1  | -0.9 | 0.018509 |
| TC0300002504.mm.1 | NM_021719          | Cldn15  | claudin 15                                      | 136966616 | 136975858 | TC0500001614.mm.1  | 0.4  | 0.018531 |
| TC0300002506.mm.1 | ENSMUST00000179168 | Gm16378 | predicted gene 16378                            | 122841731 | 122842072 | TC0800001500.mm.1  | -0.5 | 0.018531 |
| TC0300002508.mm.1 | ENSMUST00000179015 | Gm26398 | predicted gene, 26398                           | 10504647  | 10504773  | TC0200000176.mm.1  | -0.3 | 0.018535 |
| TC0300002517.mm.1 | XM_001480721       | Gm4604  | predicted gene 4604                             | 108140120 | 108140509 | TC0600002882.mm.1  | -0.6 | 0.018573 |
| TC0300002518.mm.1 | ENSMUST00000157287 | Gm24916 | predicted gene, 24916                           | 31015148  | 31015226  | TC1400001667.mm.1  | -0.8 | 0.018582 |
| TC0300002524.mm.1 | uc029urg.1         | Gm5859  | SubName: Full=Putative uncharacterized protein  | 41886578  | 41887367  | TC0400000385.mm.1  | 0.3  | 0.018607 |
| TC0300002527.mm.1 | ENSMUST00000075573 | Gm10106 | predicted gene 10106 // predicted gene 10717    | 3025417   | 3033289   | TC0900000006.mm.1  | 0.8  | 0.018613 |
| TC0300002528.mm.1 | ENSMUST00000082678 | Gm26457 | predicted gene, 26457                           | 63178677  | 63178754  | TC0100000520.mm.1  | -0.9 | 0.018617 |
| TC0300002531.mm.1 | NM_019949          | Ube2l6  | ubiquitin-conjugating enzyme E2L 6              | 84798828  | 84810335  | TC0200001222.mm.1  | 0.2  | 0.018661 |
| TC0300002541.mm.1 | NM_001029844       | Vrk1    | vaccinia related kinase 1                       | 106010228 | 106077410 | TC1200001077.mm.1  | -0.3 | 0.018663 |
| TC0300002542.mm.1 | ENSMUST00000100555 | Gm7935  | predicted pseudogene 7935                       | 1080234   | 74081511  | TC1500001704.mm.1  | -0.5 | 0.018664 |
| TC0300002549.mm.1 | ENSMUST00000182000 | Gm17786 | predicted gene, 17786                           | 121581765 | 121582191 | TC0800001464.mm.1  | -0.8 | 0.018665 |
| TC0300002551.mm.1 | NM_008876          | Pld2    | phospholipase D2                                | 70540064  | 70558110  | TC1100000956.mm.1  | 0.1  | 0.018686 |
| TC0300002554.mm.1 | NCBI_Gene:10012645 | Trav16n | T cell receptor alpha variable 16n              | 53351028  | 53351621  | TC1400000688.mm.1  | -0.4 | 0.0187   |
| TC0300002557.mm.1 | NM_173740          | Maoa    | monoamine oxidase A                             | 16619698  | 16687818  | TC0X00000181.mm.1  | 0.5  | 0.018748 |
| TC0300002558.mm.1 | NM_008845          | Pip4k2a | phosphatidylinositol-5-phosphate 4-kinase, type | 18842255  | 18998126  | TC02000003051.mm.1 | -0.8 | 0.018753 |
| TC0300002559.mm.1 | NM_178182          | Hist1h2 | histone cluster 1, H2ai                         | 21716412  | 21717454  | TC1300000173.mm.1  | -0.5 | 0.018773 |
| TC0300002563.mm.1 | NM_024217          | Cmtm3   | CKLF-like MARVEL transmembrane domain conti     | 104340594 | 104347672 | TC0800001182.mm.1  | 0.4  | 0.018798 |
| TC0300002564.mm.1 | ENSMUST00000158223 | Gm26352 | predicted gene, 26352                           | 43902928  | 43903052  | TC0100000331.mm.1  | 0.3  | 0.018854 |
| TC0300002566.mm.1 | OTTMUST00000113549 | RP23-46 | novel transcript (RIKEN cDNA A930002I21 gene)   | 107090880 | 107098401 | TC0300001111.mm.1  | -0.5 | 0.018855 |
| TC0300002569.mm.1 | NM_001080706       | Btaf1   | BTAf1 RNA polymerase II, B-TFIID transcription  | 36926079  | 37014057  | TC1900000523.mm.1  | -0.2 | 0.018855 |
| TC0300002576.mm.1 | ENSMUST00000155807 | Gm10715 | predicted gene 10715                            | 3036877   | 3038316   | TC0900000008.mm.1  | 0.8  | 0.018917 |
| TC0300002599.mm.1 | NM_178198          | Hist1h2 | histone cluster 1, H2bj                         | 22043214  | 22043676  | TC1300000192.mm.1  | -0.9 | 0.018987 |
| TC0300002612.mm.1 | NM_178199          | Hist1h2 | histone cluster 1, H2bl                         | 21715763  | 21716143  | TC1300001555.mm.1  | -1.3 | 0.018993 |
| TC0300002621.mm.1 | ENSMUST00000172394 | Gm17060 | predicted gene 17060                            | 49424061  | 49424884  | TC0600000243.mm.1  | -0.3 | 0.01901  |
| TC0300002625.mm.1 | NM_145600          | Zfp330  | zinc finger protein 330                         | 82763620  | 82774160  | TC08000002544.mm.1 | -0.2 | 0.019021 |
| TC0300002627.mm.1 | ENSMUST00000177903 | Gm15500 | predicted pseudogene 15500                      | 114705216 | 114706235 | TC07000004143.mm.1 | -0.6 | 0.019049 |
| TC0300002628.mm.1 | NM_018754          | Sfn     | stratifin                                       | 133600556 | 133602168 | TC0400003707.mm.1  | -0.2 | 0.019057 |
| TC0300002633.mm.1 | NM_172146          | Ppat    | phosphoribosyl pyrophosphate amidotransferas    | 76913249  | 76951578  | TC05000002642.mm.1 | -0.3 | 0.01906  |
| TC0300002652.mm.1 | ENSMUST00000120110 | Gm13204 | predicted gene 13204                            | 148569056 | 148569876 | TC04000004024.mm.1 | -0.2 | 0.019094 |
| TC0300002665.mm.1 | NM_010942          | Nsg1    | neuron specific gene family member 1            | 38137193  | 38159467  | TC05000002280.mm.1 | 0.1  | 0.019108 |
| TC0300002672.mm.1 | ENSMUST00000177733 | Gm24167 | predicted gene, 24167                           | 10489410  | 10489533  | TC0200000140.mm.1  | -0.3 | 0.019152 |
| TC0300002674.mm.1 | ENSMUST00000178991 | Gm24028 | predicted gene, 24028                           | 10496791  | 10496914  | TC0200000158.mm.1  | -0.3 | 0.019152 |
| TC0300002688.mm.1 | NM_001110145       | Ssb     | Sjogren syndrome antigen B                      | 69861562  | 69871846  | TC0200001013.mm.1  | -0.5 | 0.019179 |
| TC0300002695.mm.1 | NM_009898          | Coro1a  | coronin, actin binding protein 1A               | 126699773 | 126707787 | TC07000004293.mm.1 | -0.7 | 0.019242 |
| TC0300002706.mm.1 | NM_133664          | Lad1    | ladinin                                         | 135818598 | 135833341 | TC0100001256.mm.1  | -0.2 | 0.019272 |
| TC0300002714.mm.1 | ENSMUST00000072389 | Slc39a1 | solute carrier family 39 (zinc transporter), me | 30159395  | 30160366  | TC0200000526.mm.1  | 0.5  | 0.019295 |
| TC0300002718.mm.1 | NM_027828          | Fam110c | family with sequence similarity 110, member C   | 31073968  | 31079944  | TC1200000260.mm.1  | 0.5  | 0.019335 |
| TC0300002722.mm.1 | NM_175662          | Hist2h2 | histone cluster 2, H2ac                         | 96220361  | 96220880  | TC03000002499.mm.1 | -1.4 | 0.019364 |
| TC0300002725.mm.1 | ENSMUST00000164001 | Gm5244  | predicted pseudogene 5244                       | 12846773  | 12847273  | TC1900000256.mm.1  | -0.2 | 0.019378 |
| TC0300002728.mm.1 | NM_007465          | Birc2   | baculoviral IAP repeat-containing 2             | 7818226   | 7835255   | TC0900001720.mm.1  | -0.2 | 0.019409 |
| TC0300002731.mm.1 | NM_021887          | Il21r   | interleukin 21 receptor                         | 125603429 | 125633570 | TC0700001794.mm.1  | -0.4 | 0.019427 |
| TC0300002734.mm.1 | NM_001163815       | Vav1    | vav 1 oncogene                                  | 57279100  | 57329236  | TC1700001033.mm.1  | -0.8 | 0.019513 |
| TC0300002742.mm.1 | ENSMUST00000157479 | Gm22380 | predicted gene, 22380                           | 24351118  | 24351212  | TC0900000234.mm.1  | -0.2 | 0.019528 |
| TC0300002747.mm.1 | NM_178610          | Krr1    | KRR1, small subunit (SSU) processome compone    | 111972664 | 111988432 | TC1000001304.mm.1  | -0.2 | 0.019534 |
| TC0300002750.mm.1 | ENSMUST00000119853 | Gm12174 | predicted gene 12174                            | 46727818  | 46728630  | TC1100000482.mm.1  | -1.0 | 0.019535 |
| TC0300002756.mm.1 | NM_001029841       | Sla     | src-like adaptor                                | 66780819  | 66831829  | TC1500001656.mm.1  | -1.0 | 0.019539 |
| TC0300002758.mm.1 | ENSMUST00000122451 | Gm1947  | predicted pseudogene 1947                       | 157429417 | 157430326 | TC0X00001594.mm.1  | -0.3 | 0.019573 |
| TC0300002770.mm.1 | XR_105304          | Gm16794 | predicted gene, 16794                           | 95942045  | 95959393  | TC09000002873.mm.1 | -0.2 | 0.019632 |
| TC0300002776.mm.1 | NCBI_Gene:640196:p | Trav11d | T cell receptor alpha variable 11D              | 52824340  | 52824913  | TC1400000632.mm.1  | -0.4 | 0.019647 |
| TC0300002777.mm.1 | NM_172635          | Pat1l   | protein associated with topoisomerase II homol  | 11912399  | 11945096  | TC1900000235.mm.1  | -0.2 | 0.01968  |
| TC0300002778.mm.1 | NM_009859          | 7-Sep   | septin 7                                        | 25252439  | 25308571  | TC0900000244.mm.1  | -0.4 | 0.019691 |
| TC0300002785.mm.1 | ENSMUST00000120646 | Gm7722  | predicted gene 7722                             | 46535855  | 46536625  | TC0X000002147.mm.1 | -0.3 | 0.019721 |
| TC0300002790.mm.1 | XM_286185          | Gm5093  | predicted gene 5093                             | 46439503  | 46440099  | TC17000002176.mm.1 | -0.5 | 0.019739 |
| TC0300002791.mm.1 | NM_019687          | Slc22a4 | solute carrier family 22 (organic cation transp | 53983123  | 54028090  | TC1100002754.mm.1  | 0.5  | 0.019742 |
| TC0300002797.mm.1 | ENSMUST00000082661 | Gm22300 | predicted gene, 22300                           | 56913642  | 56913767  | TC0400000623.mm.1  | -0.3 | 0.019751 |
| TC0300002801.mm.1 | NCBI_Gene:10012645 | Trav8n- | T cell receptor alpha variable 8n-2             | 53345890  | 53346424  | TC1400002827.mm.1  | -0.4 | 0.019765 |
| TC0300002802.mm.1 | NM_008551          | Mapkapk | MAP kinase-activated protein kinase 2           | 131053700 | 131097543 | TC0100003051.mm.1  | 0.3  | 0.01978  |
| TC0300002805.mm.1 | NM_175482          | Usp28   | ubiquitin specific peptidase 28                 | 48985385  | 49042517  | TC0900000589.mm.1  | -0.2 | 0.019806 |
| TC0300002807.mm.1 | NM_009846          | Cd24a   | CD24a antigen                                   | 43579169  | 43584265  | TC1000000402.mm.1  | -1.1 | 0.019819 |
| TC0300002809.mm.1 | NM_001081234       | Pigg    | phosphatidylinositol glycan anchor biosynthesis | 108312609 | 108349355 | TC0500001099.mm.1  | 0.2  | 0.019845 |
| TC0300002823.mm.1 | NM_029701          | Spcs3   | signal peptidase complex subunit 3 homolog (S.  | 54520433  | 54529998  | TC0800002236.mm.1  | -0.3 | 0.019851 |

|                   |                    |         |                                                 |           |           |                    |      |          |
|-------------------|--------------------|---------|-------------------------------------------------|-----------|-----------|--------------------|------|----------|
| TC0300002827.mm.1 | NM_021551          | Slc22a1 | solute carrier family 22 (organic cation transp | 54906304  | 54913132  | TC1400002071.mm.1  | 0.1  | 0.019861 |
| TC0300002832.mm.1 | ENSMUST00000104106 | Gm24123 | predicted gene, 24123                           | 93164902  | 93164984  | TC0X00000880.mm.1  | -0.6 | 0.019865 |
| TC0300002834.mm.1 | NM_145503          | Lzts2   | leucine zipper, putative tumor suppressor 2     | 45015176  | 45027104  | TC1900000662.mm.1  | 0.1  | 0.019906 |
| TC0300002837.mm.1 | ENSMUST00000165299 | LOC5467 | 40S ribosomal protein S25-like                  | 35770318  | 35770671  | TC1800000317.mm.1  | -0.2 | 0.019945 |
| TC0300002840.mm.1 | NM_133887          | Stx12   | syntaxin 12                                     | 132853501 | 132884509 | TC0400003685.mm.1  | 0.3  | 0.019951 |
| TC0300002856.mm.1 | NR_102685          | Gm6815  | zinc finger, BED domain containing 4 pseudogen  | 36194480  | 36197886  | TC1600001566.mm.1  | -0.2 | 0.019952 |
| TC0300002857.mm.1 | NM_028679          | Irak3   | interleukin-1 receptor-associated kinase 3      | 120141648 | 120202130 | TC1000003019.mm.1  | 0.4  | 0.019984 |
| TC0300002867.mm.1 | ENSMUST00000158887 | Gm26287 | predicted gene, 26287                           | 59704258  | 59704338  | TC0100000459.mm.1  | -0.9 | 0.019984 |
| TC0300002871.mm.1 | ENSMUST00000078052 | Gm6054  | predicted gene 6054                             | 147408982 | 147409359 | TC0500001806.mm.1  | 0.5  | 0.020021 |
| TC0300002876.mm.1 | ENSMUST00000134558 | Gm16265 | predicted gene 16265                            | 12670635  | 12670742  | TC0X00000153.mm.1  | -0.4 | 0.020038 |
| TC0300002882.mm.1 | NM_009886          | Celsr1  | cadherin, EGF LAG seven-pass G-type receptor 1  | 85898758  | 86033777  | TC1500002010.mm.1  | -0.3 | 0.020043 |
| TC0300002883.mm.1 | NM_010684          | Lamp1   | lysosomal-associated membrane protein 1         | 13159135  | 13175338  | TC0800000123.mm.1  | 0.8  | 0.020051 |
| TC0300002895.mm.1 | NM_022021          | Cables1 | CDK5 and Abl enzyme substrate 1                 | 11839220  | 11945627  | TC1800000094.mm.1  | 0.2  | 0.020124 |
| TC0300002906.mm.1 | ENSMUST00000172445 | Rps8-ps | ribosomal protein S8, pseudogene 1              | 56354619  | 56355074  | TC1000002187.mm.1  | -1.1 | 0.020133 |
| TC0300002913.mm.1 | ENSMUST00000178288 | Gm8546  | predicted gene 8546                             | 89577155  | 89578413  | TC1300002391.mm.1  | -0.2 | 0.020159 |
| TC0300002916.mm.1 | NM_175649          | Tnfrsf2 | tumor necrosis factor receptor superfamily, mem | 143607685 | 143627892 | TC0700004591.mm.1  | -0.4 | 0.020173 |
| TC0300002920.mm.1 | ENSMUST00000178167 | Gm6489  | ---                                             | 31286945  | 31287706  | TC0100000196.mm.1  | -0.3 | 0.020241 |
| TC0300002923.mm.1 | ENSMUST00000158888 | Gm24875 | predicted gene, 24875                           | 25031350  | 25031453  | TC02000003126.mm.1 | 0.1  | 0.020257 |
| TC0300002926.mm.1 | ENSMUST00000075549 | Rpl9-ps | ribosomal protein L9, pseudogene 4              | 72454762  | 72455340  | TC1300002292.mm.1  | -0.7 | 0.020351 |
| TC0300002933.mm.1 | XM_001474690       | Gm10071 | predicted gene 10071                            | 58987170  | 58987805  | TC0300000465.mm.1  | -0.8 | 0.020365 |
| TC0300002938.mm.1 | NM_024223          | Crip2   | cysteine rich protein 2                         | 113140236 | 113145506 | TC1200001281.mm.1  | 0.5  | 0.020372 |
| TC0300002944.mm.1 | NM_001037997       | Fert2   | fer (fms/fps related) protein kinase, testis sp | 63863981  | 64139496  | TC1700001053.mm.1  | 0.3  | 0.020379 |
| TC0300002955.mm.1 | NM_010705          | Lgals3  | lectin, galactose binding, soluble 3            | 47367751  | 47386167  | TC1400000513.mm.1  | 0.2  | 0.020384 |
| TC0300002957.mm.1 | NCBI_Gene:620297:p | Trav6n- | T cell receptor alpha variable 6N-6             | 53132700  | 53133137  | TC1400002805.mm.1  | -0.7 | 0.020448 |
| TC0300002965.mm.1 | ENSMUST00000157165 | Gm25970 | predicted gene, 25970                           | 65056573  | 65056658  | TC1200000527.mm.1  | -0.8 | 0.020466 |
| TC0300002969.mm.1 | ENSMUST00000105172 | Gm6096  | predicted gene 6096                             | 34251038  | 34251493  | TC0700000635.mm.1  | -0.2 | 0.020477 |
| TC0300002981.mm.1 | NM_172609          | Tom22   | translocase of outer mitochondrial membrane 2   | 79670861  | 79672866  | TC1500000678.mm.1  | -0.3 | 0.020529 |
| TC0300002983.mm.1 | ENSMUST00000178097 | Tpd52-p | tumor protein D52, pseudogene                   | 79680266  | 79680824  | TC0800002522.mm.1  | -0.2 | 0.020566 |
| TC0300002993.mm.1 | ENSMUST00000081864 | Gm5239  | predicted pseudogene 5239                       | 35536583  | 35536951  | TC1800000309.mm.1  | -0.5 | 0.020631 |
| TC0300002997.mm.1 | NM_024290          | Tnfrsf2 | tumor necrosis factor receptor superfamily, mem | 143665807 | 143685872 | TC0700004593.mm.1  | 0.3  | 0.02065  |
| TC0300002998.mm.1 | NM_027539          | Dclk2   | doublecortin-like kinase 2                      | 86786150  | 86920884  | TC0300002273.mm.1  | -0.2 | 0.020654 |
| TC0300003007.mm.1 | NM_025586          | Rpl15   | ribosomal protein L15                           | 18267823  | 18271391  | TC1400001500.mm.1  | -0.2 | 0.020674 |
| TC0300003012.mm.1 | NCBI_Gene:10004332 | Trav12- | T cell receptor alpha variable 12-2             | 53616315  | 53616915  | TC1400000702.mm.1  | -0.5 | 0.020707 |
| TC0300003020.mm.1 | NM_025813          | Mfsd1   | major facilitator superfamily domain containing | 67582768  | 67604233  | TC0300000555.mm.1  | 0.5  | 0.020735 |
| TC0300003022.mm.1 | NM_008902          | Endou   | endonuclease, polyU-specific                    | 97711019  | 97731405  | TC1500002155.mm.1  | -1.0 | 0.020784 |
| TC0300003030.mm.1 | NM_175540          | Eda2r   | ectodysplasin A2 receptor                       | 97333840  | 97377216  | TC0X00002685.mm.1  | 0.1  | 0.020808 |
| TC0300003053.mm.1 | NCBI_Gene:381778:p | Igkv16- | immunoglobulin kappa variable 16-104            | 68425605  | 68426072  | TC06000003519.mm.1 | -0.9 | 0.020858 |
| TC0300003071.mm.1 | NM_016958          | Krt14   | keratin 14                                      | 100203162 | 100207548 | TC1100003760.mm.1  | -0.4 | 0.020904 |
| TC0300003087.mm.1 | NM_031842          | Smardc1 | SWI/SNF related, matrix associated, actin depen | 99702287  | 99713995  | TC1500001022.mm.1  | -0.3 | 0.020909 |
| TC0300003093.mm.1 | NM_145478          | Pim3    | proviral integration site 3                     | 88862186  | 88865726  | TC1500000854.mm.1  | 0.2  | 0.020909 |
| TC0300003098.mm.1 | ENSMUST00000122768 | Gm24630 | predicted gene, 24630                           | 150708044 | 150708149 | TC0500001870.mm.1  | -0.4 | 0.020952 |
| TC0300003100.mm.1 | NM_001166540       | Hmga1   | high mobility group AT-hook 1                   | 27556574  | 27563674  | TC1700000461.mm.1  | -0.3 | 0.020982 |
| TC0300003101.mm.1 | NM_001081188       | Exosc7  | exosome component 7                             | 123113215 | 123136129 | TC0900001656.mm.1  | -0.2 | 0.021027 |
| TC0300003108.mm.1 | NM_020332          | Ank     | progressive ankylosis                           | 27466677  | 27594909  | TC1500000175.mm.1  | 0.4  | 0.021037 |
| TC0300003128.mm.1 | NM_027629          | Pgm2l1  | phosphoglucomutase 2-like 1                     | 100227394 | 100278872 | TC0700001402.mm.1  | -0.2 | 0.021048 |
| TC0300003129.mm.1 | ENSMUST00000155839 | Gm4835  | predicted pseudogene 4835                       | 15988368  | 15989339  | TC090000136.mm.1   | -0.3 | 0.02108  |
| TC0300003134.mm.1 | NM_001042580       | Cd63    | CD63 antigen                                    | 128908919 | 128912822 | TC1000001625.mm.1  | 0.6  | 0.021097 |
| TC0300003137.mm.1 | ENSMUST00000121512 | Gm12444 | predicted gene 12444                            | 46243014  | 46243890  | TC0400002593.mm.1  | 0.3  | 0.02111  |
| TC0300003140.mm.1 | ENSMUST00000083918 | Gm22353 | predicted gene, 22353                           | 38058285  | 38058420  | TC1500000287.mm.1  | -1.1 | 0.021116 |
| TC0300003151.mm.1 | XM_001474105       | Gm15501 | ribosomal protein S8 pseudogene                 | 93178983  | 93179669  | TC0700003747.mm.1  | -0.9 | 0.021183 |
| TC0300003165.mm.1 | NM_0011199433      | Dnmt1   | DNA methyltransferase (cytosine-5) 1            | 20907206  | 20959888  | TC0900001851.mm.1  | -0.7 | 0.021185 |
| TC0300003171.mm.1 | ENSMUST00000139070 | Gm7613  | predicted gene 7613                             | 59766717  | 59767203  | TC0900002422.mm.1  | -0.8 | 0.021195 |
| TC0300003172.mm.1 | ENSMUST00000171547 | Gm6467  | predicted gene 6467                             | 21896506  | 21897116  | TC1600000306.mm.1  | -0.7 | 0.021197 |
| TC0300003184.mm.1 | ENSMUST00000170943 | Gm8775  | predicted gene 8775                             | 4211716   | 4212228   | TC0300000009.mm.1  | -0.5 | 0.021212 |
| TC0300003190.mm.1 | BC137721           | Ddx20   | DEAD (Asp-Glu-Ala-Asp) box polypeptide 20       | 105678270 | 105687574 | TC03000002672.mm.1 | -0.3 | 0.021217 |
| TC0300003191.mm.1 | ENSMUST00000163185 | Gm7701  | predicted gene 7701                             | 24257378  | 24258856  | TC1800000192.mm.1  | -0.1 | 0.021252 |
| TC0300003194.mm.1 | NM_023135          | Sult1e1 | sulfotransferase family 1E, member 1            | 87575968  | 87591611  | TC0500002700.mm.1  | 0.8  | 0.021344 |
| TC0300003206.mm.1 | ENSMUST00000095396 | Gm4799  | predicted gene 4799                             | 82954344  | 82955000  | TC1000000936.mm.1  | -0.4 | 0.021367 |
| TC0300003210.mm.1 | ENSMUST00000119653 | Gm16148 | predicted gene 16148                            | 3946199   | 3947091   | TC1000001672.mm.1  | -0.3 | 0.021435 |
| TC0300003215.mm.1 | ENSMUST00000042280 | Gm7964  | predicted gene 7964                             | 83755904  | 83757356  | TC0700001201.mm.1  | -0.8 | 0.021444 |
| TC0300003216.mm.1 | XM_001478802       | Gm4199  | predicted gene 4199                             | 108094129 | 108094485 | TC0700004045.mm.1  | -0.4 | 0.021486 |
| TC0300003225.mm.1 | NM_026532          | Nutf2   | nuclear transport factor 2                      | 105860580 | 105880402 | TC0800001231.mm.1  | -0.4 | 0.021524 |
| TC0300003226.mm.1 | NM_010608          | Kcnk3   | potassium channel, subfamily K, member 3        | 30588170  | 30625270  | TC0500000295.mm.1  | 0.3  | 0.021526 |
| TC0300003246.mm.1 | NM_027967          | Fam217a | family with sequence similarity 217, member A   | 34909964  | 34919992  | TC1300001792.mm.1  | 0.3  | 0.021527 |
| TC0300003247.mm.1 | NM_175661          | Hist1h2 | histone cluster 1, H2af                         | 23534304  | 23534304  | TC1300000245.mm.1  | -1.3 | 0.021529 |
| TC0300003250.mm.1 | NM_172682          | Fam160a | family with sequence similarity 160, member A1  | 85660061  | 85746266  | TC0300002257.mm.1  | 0.1  | 0.021543 |
| TC0300003251.mm.1 | NM_009903          | Cldn4   | claudin 4                                       | 134945123 | 134946934 | TC0500003384.mm.1  | -0.3 | 0.021551 |
| TC0300003252.mm.1 | NCBI_Gene:667476:p | Trav8d- | T cell receptor alpha variable 8D-1             | 52778447  | 52778995  | TC1400000627.mm.1  | -0.3 | 0.021619 |
| TC0400000007.mm.1 | NM_001252089       | Rbmxl1  | RNA binding motif protein, X linked-like-1      | 78505269  | 78508928  | TC0800002510.mm.1  | -0.2 | 0.021657 |
| TC0400000010.mm.1 | ENSMUST00000140747 | Gm16305 | predicted gene 16305                            | 138991550 | 138992021 | TC0100003180.mm.1  | -0.4 | 0.021669 |
| TC0400000036.mm.1 | NM_001289915       | Cd83    | CD83 antigen (Cd83), transcript variant 2, mRNA | 0         | 0         | TSUnmapped0000004  | -0.8 | 0.021669 |
| TC0400000048.mm.1 | ENSMUST00000180049 | Gm6919  | predicted gene 6919                             | 53598181  | 53598663  | TC1700002284.mm.1  | -0.3 | 0.021683 |
| TC0400000050.mm.1 | NM_138584          | Spg21   | spastic paraplegia 21 homolog (human)           | 65460937  | 65488470  | TC0900000845.mm.1  | 0.3  | 0.02171  |
| TC0400000052.mm.1 | NCBI_Gene:10004330 | Trav14n | T cell receptor alpha variable 14N-3            | 53370054  | 53370575  | TC1400002807.mm.1  | -0.5 | 0.021728 |
| TC0400000063.mm.1 | ENSMUST00000120436 | Gm10601 | predicted pseudogene 10601                      | 41809083  | 41810504  | TC0400000383.mm.1  | 0.3  | 0.021737 |
| TC0400000067.mm.1 | NM_027558          | Pgrmc2  | progesterone receptor membrane component 2      | 41066326  | 41083046  | TC0300001909.mm.1  | 0.2  | 0.021764 |
| TC0400000074.mm.1 | NM_001081007       | Zfp382  | zinc finger protein 382                         | 30121942  | 30135032  | TC0700000548.mm.1  | -0.2 | 0.021779 |
| TC0400000075.mm.1 | ENSMUST00000092020 | Gm8444  | predicted gene 8444                             | 81843343  | 81843699  | TC1500001930.mm.1  | -0.5 | 0.02182  |

|                   |                    |         |                                                 |           |           |                    |      |          |
|-------------------|--------------------|---------|-------------------------------------------------|-----------|-----------|--------------------|------|----------|
| TC0400000076.mm.1 | XR_104866          | 2310067 | RIKEN cDNA 2310067E19 gene                      | 82454770  | 82458099  | TC0400002936.mm.1  | 0.2  | 0.021838 |
| TC0400000081.mm.1 | NR_029726          | Mirlet7 | microRNA let7a-2                                | 41536716  | 41536811  | TC0900000470.mm.1  | 0.2  | 0.021842 |
| TC0400000082.mm.1 | ENSMUST00000082002 | Gm7808  | predicted pseudogene 7808                       | 19927896  | 19928282  | TC0900001826.mm.1  | -0.6 | 0.021857 |
| TC0400000083.mm.1 | XR_141370          | Gm19939 | predicted gene, 19939                           | 51130503  | 51133337  | TC1800000518.mm.1  | 0.3  | 0.021862 |
| TC0400000089.mm.1 | ENSMUST00000168856 | Gm17181 | predicted gene 17181                            | 87514175  | 87514297  | TC0100000818.mm.1  | -0.4 | 0.021866 |
| TC0400000093.mm.1 | NM_009768          | Bsg     | basigin                                         | 79704358  | 79711979  | TC1000000812.mm.1  | 0.7  | 0.021951 |
| TC0400000096.mm.1 | NM_022996          | Ndfip1  | Nedd4 family interacting protein 1              | 38418975  | 38464839  | TC1800000401.mm.1  | 0.4  | 0.021963 |
| TC0400000106.mm.1 | XM_001478520       | Gm10177 | predicted gene 10177                            | 37252922  | 37253365  | TC0900000360.mm.1  | -0.4 | 0.021967 |
| TC0400000109.mm.1 | ENSMUST00000089898 | Rps15-p | ribosomal protein S15, pseudogene 2             | 58017490  | 58017975  | TC0600000701.mm.1  | -0.6 | 0.022007 |
| TC0400000113.mm.1 | NM_009338          | Acat2   | acetyl-Coenzyme A acetyltransferase 2           | 12942890  | 12960747  | TC1700001459.mm.1  | 0.3  | 0.022087 |
| TC0400000122.mm.1 | NM_030564          | Rnf34   | ring finger protein 34                          | 122823771 | 122868945 | TC0500001403.mm.1  | -0.2 | 0.022117 |
| TC0400000124.mm.1 | NM_027237          | 2010003 | RIKEN cDNA 2010003K11 gene                      | 4496788   | 4498583   | TC1900000924.mm.1  | 0.1  | 0.022209 |
| TC0400000127.mm.1 | ENSMUST00000122256 | Gm14200 | predicted gene 14200                            | 158468169 | 158468360 | TC02000005036.mm.1 | -0.6 | 0.022229 |
| TC0400000133.mm.1 | NM_001290010       | Ache    | acetylcholinesterase (Ache), transcript variant | 0         | 0         | TSUnmapped0000003  | -0.5 | 0.022252 |
| TC0400000134.mm.1 | NM_024255          | HsdI2   | hydroxysteroid dehydrogenase like 2             | 59581563  | 59618694  | TC0400000659.mm.1  | 0.4  | 0.022286 |
| TC0400000137.mm.1 | ENSMUST00000162698 | Gm3531  | predicted pseudogene 3531                       | 97948901  | 97949389  | TC0100002868.mm.1  | -0.6 | 0.0223   |
| TC0400000140.mm.1 | NM_007720          | Ccr8    | chemokine (C-C motif) receptor 8                | 120092133 | 120094906 | TC0900001592.mm.1  | -0.2 | 0.022305 |
| TC0400000144.mm.1 | ENSMUST00000121107 | Gm13450 | predicted gene 13450                            | 34964877  | 34964904  | TC02000003356.mm.1 | -1.0 | 0.022307 |
| TC0400000147.mm.1 | NM_033596          | Hist2h4 | histone cluster 2, H4                           | 96261682  | 96263317  | TC0300002504.mm.1  | -0.6 | 0.022307 |
| TC0400000163.mm.1 | ENSMUST00000120328 | Gm13729 | predicted gene 13729                            | 87304739  | 87305144  | TC0200001284.mm.1  | -0.3 | 0.022364 |
| TC0400000167.mm.1 | NM_026453          | Mak16   | MAK16 homolog (S. cerevisiae)                   | 31159467  | 31168739  | TC0800001977.mm.1  | -0.4 | 0.022397 |
| TC0400000168.mm.1 | XM_003688930       | Gm21685 | predicted gene, 21685                           | 69555401  | 69585613  | TC1400000980.mm.1  | 0.3  | 0.022413 |
| TC0400000169.mm.1 | NM_153173          | Hist1h4 | histone cluster 1, H4h                          | 23531044  | 23531522  | TC1300000244.mm.1  | -0.5 | 0.022437 |
| TC0400000171.mm.1 | NM_146203          | Zfp764  | zinc finger protein 764                         | 127403668 | 127406822 | TC0700004326.mm.1  | -0.2 | 0.022478 |
| TC0400000175.mm.1 | NM_008048          | Igfbp7  | insulin-like growth factor binding protein 7    | 77349240  | 77408045  | TC0500002651.mm.1  | 1.0  | 0.022512 |
| TC0400000198.mm.1 | NM_030710          | Slamf6  | SLAM family member 6                            | 171917537 | 171953167 | TC0100001604.mm.1  | -1.1 | 0.022529 |
| TC0400000205.mm.1 | NM_025485          | Mrps22  | mitochondrial ribosomal protein S22             | 98588730  | 98601679  | TC04000002908.mm.1 | -0.2 | 0.022545 |
| TC0400000219.mm.1 | NM_031395          | Sytl3   | synaptotagmin-like 3                            | 6659093   | 6738044   | TC1700000064.mm.1  | -0.4 | 0.022562 |
| TC0400000223.mm.1 | NM_145492          | Zfp521  | zinc finger protein 521                         | 13687013  | 13972733  | TC1800001005.mm.1  | 0.2  | 0.022602 |
| TC0400000227.mm.1 | NM_145619          | Parp3   | poly (ADP-ribose) polymerase family, member 3   | 106470322 | 106476949 | TC0900003011.mm.1  | 0.3  | 0.022634 |
| TC0400000228.mm.1 | ENSMUST00000088648 | Rpl31-p | ribosomal protein L31, pseudogene 8             | 90764246  | 90764679  | TC1500002069.mm.1  | -1.2 | 0.022773 |
| TC0400000238.mm.1 | NM_001048061       | Hnrnpab | heterogeneous nuclear ribonucleoprotein A/B     | 51600100  | 51606881  | TC1100002694.mm.1  | -0.6 | 0.022783 |
| TC0400000248.mm.1 | ENSMUST00000164523 | Gm5611  | predicted gene 5611                             | 17030045  | 17030899  | TC0900000131.mm.1  | -0.8 | 0.022793 |
| TC0400000253.mm.1 | NM_053168          | Trim11  | tripartite motif-containing 11                  | 58978093  | 58991458  | TC1100000715.mm.1  | -0.2 | 0.022799 |
| TC0400000277.mm.1 | ENSMUST00000158110 | Gm23897 | predicted gene, 23897                           | 64318407  | 64318564  | TC0300002081.mm.1  | -0.4 | 0.022809 |
| TC0400000281.mm.1 | NM_010724          | Psmb8   | proteasome (prosome, macropain) subunit, beta   | 34197721  | 34201454  | TC1700000622.mm.1  | -0.5 | 0.022809 |
| TC0400000296.mm.1 | NM_175688          | A530099 | RIKEN cDNA A530099J19 gene                      | 19727417  | 19732951  | TC1300001525.mm.1  | -0.3 | 0.022826 |
| TC0400000300.mm.1 | NM_019580          | Gde1    | glycerophosphodiester phosphodiesterase 1       | 118688545 | 118705778 | TC0700004176.mm.1  | 0.3  | 0.02286  |
| TC0400000303.mm.1 | NM_001017422       | Ear4    | eosinophil-associated, ribonuclease A family, m | 51203689  | 51204156  | TC1400000583.mm.1  | 0.2  | 0.022862 |
| TC0400000320.mm.1 | NM_008137          | Gna14   | guanine nucleotide binding protein, alpha 14    | 16435667  | 16610818  | TC1900000309.mm.1  | -0.2 | 0.022871 |
| TC0400000355.mm.1 | ENSMUST00000120609 | Gm13161 | predicted gene 13161                            | 147444029 | 147444029 | TC0400001909.mm.1  | -0.2 | 0.022875 |
| TC0400000361.mm.1 | ENSMUST00000175771 | Gm9399  | predicted gene 9399                             | 122494613 | 122495251 | TC1400002755.mm.1  | -0.2 | 0.022893 |
| TC0400000365.mm.1 | NM_001168672       | Gtse1   | G two S phase expressed protein 1               | 85859707  | 85876573  | TC1500000826.mm.1  | -0.3 | 0.022919 |
| TC0400000374.mm.1 | ENSMUST00000118855 | Gm13244 | predicted gene 13244                            | 145745746 | 145747401 | TC0400001871.mm.1  | 0.5  | 0.022939 |
| TC0400000383.mm.1 | ENSMUST00000121853 | Gm11263 | predicted gene 11263                            | 79327708  | 79328456  | TC0400000804.mm.1  | -0.9 | 0.022944 |
| TC0400000385.mm.1 | NCBI_Gene:320898:p | Trav3-3 | Trav3-3 T cell receptor alpha variable 3-3      | 53665929  | 53668335  | TC1400002823.mm.1  | -0.3 | 0.022961 |
| TC0400000387.mm.1 | XM_001472963       | Gm2260  | predicted gene 2260                             | 26012802  | 26026574  | TC1400000252.mm.1  | 0.3  | 0.022981 |
| TC0400000389.mm.1 | NM_010577          | Itga5   | integrin alpha 5 (fibronectin receptor alpha)   | 103344286 | 103366763 | TC1500002318.mm.1  | 0.3  | 0.02302  |
| TC0400000393.mm.1 | NM_173867          | Rcc2    | regulator of chromosome condensation 2          | 140700541 | 140723220 | TC0400001766.mm.1  | -0.6 | 0.023068 |
| TC0400000394.mm.1 | NM_001253874       | Itgal   | integrin alpha L                                | 127296260 | 127335137 | TC0700001841.mm.1  | -0.9 | 0.023069 |
| TC0400000401.mm.1 | NM_001161768       | Galnt6  | UDP-N-acetyl-alpha-D-galactosamine:polypeptid   | 100689915 | 100729376 | TC12000002250.mm.1 | -0.2 | 0.023077 |
| TC0400000402.mm.1 | NCBI_Gene:10004319 | Trav12d | Trav12d-2 T cell receptor alpha variable 12D-2  | 52915909  | 52916431  | TC1400000643.mm.1  | -0.6 | 0.023222 |
| TC0400000409.mm.1 | NM_175542          | Rttm    | rotatin                                         | 88971790  | 89131014  | TC1800000908.mm.1  | -0.2 | 0.023243 |
| TC0400000412.mm.1 | NM_001085500       | Cisd3   | CDGSH iron sulfur domain 3                      | 97685596  | 97688625  | TC1100001545.mm.1  | 0.3  | 0.02326  |
| TC0400000413.mm.1 | NM_183249          | 1100001 | RIKEN cDNA 1100001G20 gene                      | 83746940  | 83752646  | TC1100001267.mm.1  | 0.5  | 0.02331  |
| TC0400000416.mm.1 | ENSMUST00000121695 | Gm12164 | predicted gene 12164                            | 45829319  | 45829887  | TC100000458.mm.1   | 0.8  | 0.023325 |
| TC0400000445.mm.1 | ENSMUST00000118337 | Gm11212 | predicted gene 11212                            | 63350411  | 63353846  | TC0400000719.mm.1  | 0.1  | 0.023335 |
| TC0400000449.mm.1 | NM_011512          | Surf4   | surfeit gene 4                                  | 26920040  | 26933928  | TC02000003205.mm.1 | 0.3  | 0.02334  |
| TC0400000450.mm.1 | NM_133720          | Cysltr2 | cysteinyl leukotriene receptor 2                | 73029128  | 73049114  | TC1400002378.mm.1  | -0.3 | 0.023395 |
| TC0400000458.mm.1 | NM_024190          | Chmp1b  | charged multivesicular body protein 1B          | 67205359  | 67207887  | TC1800000698.mm.1  | -0.3 | 0.023408 |
| TC0400000460.mm.1 | ENSMUST00000101625 | Gm9144  | predicted gene 9144                             | 7859827   | 7861205   | TC1200000056.mm.1  | -0.4 | 0.023477 |
| TC0400000476.mm.1 | NM_007650          | Cd5     | CD5 antigen                                     | 10718143  | 10738974  | TC1900001113.mm.1  | -0.9 | 0.023479 |
| TC0400000481.mm.1 | NM_001123371       | Pnp2    | purine-nucleoside phosphorylase 2               | 50955992  | 50964749  | TC1400000575.mm.1  | 0.4  | 0.023484 |
| TC0400000490.mm.1 | NM_018730          | Rpl36   | ribosomal protein L36                           | 56613395  | 56614246  | TC1700001012.mm.1  | -0.7 | 0.023596 |
| TC0400000508.mm.1 | NR_045113          | Gm2027  | nuclear assembly factor 1 homolog pseudogene    | 44221356  | 44313437  | TC1200000387.mm.1  | 0.4  | 0.023616 |
| TC0400000514.mm.1 | NM_152812          | Otud6b  | OTU domain containing 6B                        | 14809498  | 14826587  | TC0400002236.mm.1  | 0.3  | 0.023641 |
| TC0400000516.mm.1 | NM_011909          | Usp18   | ubiquitin specific peptidase 18                 | 121245906 | 121270917 | TC0600001369.mm.1  | -0.5 | 0.023661 |
| TC0400000522.mm.1 | NM_011960          | Parg    | poly (ADP-ribose) glycohydrolase                | 32201949  | 32297550  | TC1400000341.mm.1  | -0.2 | 0.023674 |
| TC0400000524.mm.1 | NM_199195          | Bckdhhb | branched chain ketoacid dehydrogenase E1, bet   | 83925150  | 84124240  | TC0900001103.mm.1  | 0.5  | 0.023677 |
| TC0400000526.mm.1 | NM_022419          | Abhd8   | abhydrolase domain containing 8                 | 71456700  | 71463657  | TC0800002425.mm.1  | -0.3 | 0.023692 |
| TC0400000535.mm.1 | NM_007771          | Cry1    | cryptochrome 1 (photolyase-like)                | 85131700  | 85185054  | TC1000002605.mm.1  | -0.3 | 0.023765 |
| TC0400000538.mm.1 | ENSMUST00000118779 | Gm11313 | predicted gene 11313                            | 22758927  | 22759358  | TC1300000218.mm.1  | -0.3 | 0.023766 |
| TC0400000544.mm.1 | ENSMUST00000098307 | Gm6091  | predicted pseudogene 6091                       | 126476248 | 126476412 | TC08000003190.mm.1 | -0.3 | 0.02377  |
| TC0400000558.mm.1 | NM_008550          | Man2b2  | mannosidase 2, alpha B2                         | 36806813  | 36830653  | TC0500002266.mm.1  | 0.4  | 0.023808 |
| TC0400000561.mm.1 | NM_001033300       | Gmps    | guanine monophosphate synthetase                | 63976106  | 64022579  | TC0300000507.mm.1  | -0.3 | 0.02381  |
| TC0400000563.mm.1 | NM_015797          | Fbxo6   | F-box protein 6                                 | 148145716 | 148152140 | TC0400004014.mm.1  | 0.2  | 0.023867 |
| TC0400000565.mm.1 | NM_009325          | Tbxa2r  | thromboxane A2 receptor                         | 81328703  | 81335174  | TC1000000894.mm.1  | -0.4 | 0.023908 |
| TC0400000573.mm.1 | ENSMUST00000086233 | Gm10179 | predicted gene 10179                            | 12085922  | 12086612  | TC0700002334.mm.1  | 0.4  | 0.023917 |

|                   |                    |         |                                                 |           |           |                    |      |          |
|-------------------|--------------------|---------|-------------------------------------------------|-----------|-----------|--------------------|------|----------|
| TC0400000591.mm.1 | ENSMUST00000122138 | Gm12749 | predicted gene 12749                            | 109373701 | 109374859 | TC0400003265.mm.1  | -0.3 | 0.023994 |
| TC0400000592.mm.1 | XM_357051          | Ms4a14  | membrane-spanning 4-domains, subfamily A, mem   | 11301494  | 11314333  | TC1900001130.mm.1  | 0.2  | 0.024035 |
| TC0400000610.mm.1 | ENSMUST00000082636 | Gm25800 | predicted gene, 25800                           | 62456987  | 62457120  | TC1700002367.mm.1  | -0.7 | 0.024116 |
| TC0400000623.mm.1 | NM_032398          | Plvap   | plasmalemma vesicle associated protein          | 71497753  | 71511769  | TC0800002429.mm.1  | 0.4  | 0.024187 |
| TC0400000649.mm.1 | XM_001002180       | Gm9234  | predicted pseudogene 9234                       | 121014929 | 121015633 | TC0700004202.mm.1  | -0.6 | 0.024198 |
| TC0400000659.mm.1 | ENSMUST00000120024 | Gm8659  | predicted gene 8659                             | 158150096 | 158151179 | TC0X00001603.mm.1  | 0.3  | 0.02427  |
| TC0400000663.mm.1 | NM_001033220       | AU02109 | expressed sequence AU021092                     | 5211819   | 5222299   | TC1600001156.mm.1  | 0.1  | 0.024281 |
| TC0400000664.mm.1 | XM_001472223       | Gm15032 | predicted gene 15032                            | 142622492 | 142625562 | TC0X00003105.mm.1  | -0.2 | 0.024288 |
| TC0400000667.mm.1 | NCBI_Gene:10004256 | Trav11n | Trav11n T cell receptor alpha variable 11N      | 53135122  | 53135678  | TC1400000662.mm.1  | -0.3 | 0.024302 |
| TC0400000676.mm.1 | NM_146057          | Dap     | death-associated protein                        | 31224385  | 31274341  | TC1500000199.mm.1  | 0.7  | 0.024326 |
| TC0400000679.mm.1 | XM_001487797       | Xlr4d-p | X-linked lymphocyte-regulated 4D, pseudogene    | 74727229  | 74734141  | TC0X00000724.mm.1  | -0.5 | 0.024337 |
| TC0400000696.mm.1 | NM_172546          | Cnksr3  | Cnksr family member 3                           | 7119062   | 7212237   | TC1000001694.mm.1  | 0.2  | 0.024402 |
| TC0400000697.mm.1 | ENSMUST00000120403 | Gm6184  | predicted gene 6184                             | 101518985 | 101520245 | TC0X00000978.mm.1  | -0.2 | 0.024408 |
| TC0400000700.mm.1 | NM_146236          | Tceal1  | transcription elongation factor A (SII)-like 1  | 136707982 | 136711478 | TC0X00001335.mm.1  | 0.2  | 0.024422 |
| TC0400000702.mm.1 | NM_011304          | Ruvbl2  | RuvB-like protein 2                             | 45421852  | 45438096  | TC0700003005.mm.1  | -0.3 | 0.024423 |
| TC0400000717.mm.1 | ENSMUST00000082602 | Gm23615 | predicted gene, 23615                           | 73809417  | 73809481  | TC0X00000697.mm.1  | -0.8 | 0.02443  |
| TC0400000718.mm.1 | NM_001080995       | 4632434 | RIKEN cDNA 4632434I11 gene                      | 9287526   | 92874232  | TC0X00003743.mm.1  | -0.3 | 0.024474 |
| TC0400000719.mm.1 | NR_004417          | Snord73 | small nucleolar RNA, C/D box U73A               | 86138791  | 86138858  | TC0300002264.mm.1  | -1.1 | 0.024505 |
| TC0400000720.mm.1 | NM_001110498       | Ifnar2  | interferon (alpha and beta) receptor 2          | 91372783  | 91405589  | TC1600002172.mm.1  | 0.4  | 0.024506 |
| TC0400000721.mm.1 | ENSMUST00000117264 | Gm13416 | predicted gene 13416                            | 24592902  | 24594513  | TC02000003117.mm.1 | 0.3  | 0.024529 |
| TC0400000725.mm.1 | ENSMUST00000119494 | Plk-ps1 | polo-like kinase, pseudogene 1                  | 35554184  | 35555971  | TC0500000396.mm.1  | -0.2 | 0.024536 |
| TC0400000742.mm.1 | NM_027706          | Nbas    | neuroblastoma amplified sequence                | 13269127  | 13583811  | TC1200000110.mm.1  | 0.2  | 0.02459  |
| TC0400000745.mm.1 | NM_001113367       | Boll    | bol, boule-like (Drosophila)                    | 55248658  | 55363469  | TC0100002357.mm.1  | -0.2 | 0.024596 |
| TC0400000748.mm.1 | ENSMUST00000167999 | Cct3-ps | chaperonin containing Tcp1, subunit 3 (gamma)   | 52900599  | 52902683  | TC0400000573.mm.1  | -0.3 | 0.024643 |
| TC0400000750.mm.1 | NM_025980          | Nrarp   | Notch-regulated ankyrin repeat protein          | 25180758  | 25183339  | TC0200000398.mm.1  | 0.2  | 0.024668 |
| TC0400000751.mm.1 | ENSMUST00000085711 | Gm5121  | predicted gene 5121                             | 57334128  | 57334754  | TC0900000700.mm.1  | -0.8 | 0.024716 |
| TC0400000765.mm.1 | NM_009919          | Cnih    | cornichon homolog (Drosophila)                  | 46775567  | 46788411  | TC14000001920.mm.1 | 0.2  | 0.024717 |
| TC0400000775.mm.1 | ENSMUST00000171712 | Gm9364  | predicted gene 9364                             | 122861884 | 122862676 | TC0300001250.mm.1  | -0.3 | 0.024744 |
| TC0400000776.mm.1 | NM_183016          | Cdc42bp | CDC42 binding protein kinase beta               | 111292972 | 111377718 | TC1200002402.mm.1  | 0.3  | 0.024773 |
| TC0400000783.mm.1 | ENSMUST00000120096 | Gm16219 | predicted gene 16219                            | 75969898  | 75970171  | TC1000000732.mm.1  | -0.2 | 0.024779 |
| TC0400000786.mm.1 | ENSMUST00000119855 | Gm12919 | predicted gene 12919                            | 10853843  | 10855436  | TC0400000076.mm.1  | -0.4 | 0.024801 |
| TC0400000804.mm.1 | ENSMUST00000102782 | Rpl35   | ribosomal protein L35                           | 156366040 | 156366484 | TC0100001414.mm.1  | -0.8 | 0.024833 |
| TC0400000811.mm.1 | NM_028006          | Tube1   | epsilon-tubulin 1                               | 39134023  | 39151058  | TC1000000324.mm.1  | -0.6 | 0.024884 |
| TC0400000820.mm.1 | NM_010330          | Emb     | embigin                                         | 117220573 | 117274415 | TC1300001326.mm.1  | -0.5 | 0.024901 |
| TC0400000831.mm.1 | NCBI_Gene:10004317 | Trav12d | Trav12d-1 T cell receptor alpha variable 12D-1  | 52844465  | 52845369  | TC1400000634.mm.1  | -0.3 | 0.024956 |
| TC0400000844.mm.1 | NCBI_Gene:10004321 | Trav12n | T cell receptor alpha variable 12N-1            | 53155512  | 53156416  | TC1400000664.mm.1  | -0.3 | 0.024956 |
| TC0400000847.mm.1 | NM_134130          | Abhd3   | abhydrolase domain containing 3                 | 10644411  | 10706771  | TC1800000980.mm.1  | 0.3  | 0.024993 |
| TC0400000850.mm.1 | ENSMUST00000117230 | Gm11221 | predicted gene 11221                            | 69691978  | 69692574  | TC0400000750.mm.1  | -0.2 | 0.024995 |
| TC0400000865.mm.1 | ENSMUST00000119505 | Gm13922 | predicted gene 13922                            | 111698723 | 111698878 | TC0200004330.mm.1  | -0.2 | 0.025003 |
| TC0400000867.mm.1 | NM_009915          | Ccr2    | chemokine (C-C motif) receptor 2                | 124101950 | 124113557 | TC0900001674.mm.1  | 0.4  | 0.025016 |
| TC0400000873.mm.1 | NM_001242940       | E130003 | RIKEN cDNA E130003G02 gene                      | 25291220  | 25298928  | TC0200000409.mm.1  | 0.2  | 0.025031 |
| TC0400000876.mm.1 | NM_001038231       | Banf1   | barrier to autointegration factor 1             | 5364633   | 5366876   | TC1900000960.mm.1  | -0.2 | 0.025076 |
| TC0400000877.mm.1 | NM_178357          | Klf11   | Kruppel-like factor 11                          | 24651371  | 24662782  | TC1200000201.mm.1  | 0.1  | 0.025088 |
| TC0400000889.mm.1 | NM_008256          | Hmgcs2  | 3-hydroxy-3-methylglutaryl-Coenzyme A synthas   | 98280431  | 98310738  | TC0300000979.mm.1  | 0.6  | 0.025093 |
| TC0400000890.mm.1 | NCBI_Gene:381831:p | Igkv4-5 | immunoglobulin kappa variable 4-58              | 69500254  | 69500758  | TC0600003568.mm.1  | -0.8 | 0.025107 |
| TC0400000898.mm.1 | NM_001101657       | Gm11711 | predicted gene 11711                            | 115020689 | 115027012 | TC1100004057.mm.1  | 0.4  | 0.025141 |
| TC0400000915.mm.1 | ENSMUST00000177630 | Gm22775 | predicted gene, 22775                           | 10485250  | 10485369  | TC0200000130.mm.1  | -0.2 | 0.0252   |
| TC0400000917.mm.1 | NM_027654          | Pcgf6   | polycomb group ring finger 6                    | 47033617  | 47050884  | TC1900001619.mm.1  | -0.2 | 0.02522  |
| TC0400000921.mm.1 | XR_104530          | Gm7634  | predicted gene 7634                             | 16053335  | 16053906  | TC0100000096.mm.1  | -0.2 | 0.025311 |
| TC0400000939.mm.1 | NM_009786          | Cacybp  | calcyclin binding protein                       | 160202367 | 160212892 | TC0100003351.mm.1  | -0.4 | 0.025395 |
| TC0400000941.mm.1 | NM_010360          | Gstm5   | glutathione S-transferase, mu 5                 | 107895821 | 107898686 | TC0300001124.mm.1  | 0.4  | 0.025398 |
| TC0400000944.mm.1 | NM_001008506       | Zc3h14  | zinc finger CCCH type containing 14             | 98746968  | 98787774  | TC1200000970.mm.1  | -0.3 | 0.025406 |
| TC0400000948.mm.1 | ENSMUST00000182857 | Gm18822 | predicted gene, 18822                           | 8615275   | 8616504   | TC0300001615.mm.1  | -0.2 | 0.025418 |
| TC0400000954.mm.1 | NM_028074          | Ddx42   | DEAD (Asp-Glu-Ala-Asp) box polypeptide 42       | 106216926 | 106249140 | TC1100001776.mm.1  | -0.2 | 0.02551  |
| TC0400000960.mm.1 | NM_205823          | Tlr12   | toll-like receptor 12                           | 128615446 | 128618619 | TC0400003577.mm.1  | -0.4 | 0.025512 |
| TC0400000978.mm.1 | NM_007999          | Fen1    | flap structure specific endonuclease 1          | 10199132  | 10204169  | TC1900001096.mm.1  | -0.2 | 0.025527 |
| TC0400000985.mm.1 | NM_026841          | 1110059 | RIKEN cDNA 1110059M19 gene                      | 45090904  | 45092791  | TC0X00000414.mm.1  | 0.5  | 0.025569 |
| TC0400000988.mm.1 | NM_018877          | Setdb1  | SET domain, bifurcated 1                        | 95323525  | 95357202  | TC0300002475.mm.1  | -0.2 | 0.025586 |
| TC0400000992.mm.1 | NM_013494          | Cpe     | carboxypeptidase E                              | 64592542  | 64693040  | TC0800002310.mm.1  | 0.4  | 0.025625 |
| TC0400001002.mm.1 | ENSMUST00000082518 | Gm24564 | predicted gene, 24564                           | 109631074 | 109631148 | TC1200001147.mm.1  | 0.5  | 0.025627 |
| TC0400001010.mm.1 | ENSMUST00000175224 | Gm22242 | predicted gene, 22242                           | 52756908  | 52757025  | TC0900000634.mm.1  | 0.3  | 0.025654 |
| TC0400001027.mm.1 | ENSMUST00000181256 | Gm2907  | predicted gene 2907                             | 3876445   | 3877636   | TC1400001370.mm.1  | -0.2 | 0.025685 |
| TC0400001038.mm.1 | NM_178751          | Orai2   | ORAI calcium release-activated calcium modulat  | 136147459 | 136170656 | TC0500003415.mm.1  | -0.2 | 0.025736 |
| TC0400001039.mm.1 | ENSMUST00000178509 | Gm4199  | predicted gene 4199 // family with sequence si  | 44464243  | 44464602  | TC0900000512.mm.1  | -0.4 | 0.025744 |
| TC0400001041.mm.1 | NM_009716          | Atf4    | activating transcription factor 4               | 80255184  | 80257545  | TC1500000698.mm.1  | -0.2 | 0.025779 |
| TC0400001074.mm.1 | NM_172410          | Nup93   | nucleoporin 93                                  | 94214597  | 94317227  | TC0800001097.mm.1  | -0.2 | 0.025788 |
| TC0400001075.mm.1 | ENSMUST00000179075 | CR97458 | N/A                                             | 41306     | 43295     | TC4_JH584293_rand  | -0.2 | 0.025828 |
| TC0400001080.mm.1 | NM_026635          | Fam96a  | family with sequence similarity 96, member A    | 66126611  | 66138968  | TC0900000863.mm.1  | -0.3 | 0.02587  |
| TC0400001101.mm.1 | ENSMUST00000116034 | Rpl31-p | ribosomal protein L31, pseudogene 10            | 137395299 | 137395676 | TC0400001706.mm.1  | -1.1 | 0.025909 |
| TC0400001107.mm.1 | ENSMUST00000075049 | Gm10136 | predicted pseudogene 10136                      | 29003405  | 29003842  | TC1900001335.mm.1  | -0.7 | 0.025921 |
| TC0400001137.mm.1 | NM_007637          | Cct5    | chaperonin containing Tcp1, subunit 5 (epsilon) | 31590800  | 31601847  | TC1500001326.mm.1  | -0.3 | 0.025935 |
| TC0400001148.mm.1 | NM_017469          | Gucy1b3 | guanylate cyclase 1, soluble, beta 3            | 82032004  | 82074711  | TC0300002219.mm.1  | 0.3  | 0.025936 |
| TC0400001158.mm.1 | ENSMUST00000119692 | Gm5760  | predicted gene 5760                             | 99081401  | 99082402  | TC0X00002696.mm.1  | -0.2 | 0.025946 |
| TC0400001166.mm.1 | NM_025748          | Adat2   | adenosine deaminase, tRNA-specific 2            | 13552894  | 13563376  | TC1000000097.mm.1  | -0.2 | 0.02598  |
| TC0400001171.mm.1 | NM_133934          | Isv1    | ISV1 splicing factor homolog (S. cerevisiae)    | 87818447  | 87838759  | TC0600002666.mm.1  | -0.3 | 0.026142 |
| TC0400001184.mm.1 | NM_026947          | Eci3    | enoyl-Coenzyme A delta isomerase 3              | 34946614  | 34963810  | TC1300001793.mm.1  | 0.5  | 0.026181 |
| TC0400001197.mm.1 | NM_145946          | Fanci   | Fanconi anemia, complementation group I         | 79391929  | 79450265  | TC0700001122.mm.1  | -0.3 | 0.02621  |
| TC0400001198.mm.1 | ENSMUST00000120368 | Gm15465 | predicted gene 15465                            | 24322660  | 24322784  | TC0700002596.mm.1  | -0.2 | 0.026239 |

|                   |                    |         |                                                 |           |           |                    |      |          |
|-------------------|--------------------|---------|-------------------------------------------------|-----------|-----------|--------------------|------|----------|
| TC0400001216.mm.1 | ENSMUST00000177887 | Gm7061  | predicted gene 7061                             | 94772616  | 94774034  | TC0X00002652.mm.1  | -0.2 | 0.026315 |
| TC0400001221.mm.1 | NM_010278          | Gfi1    | growth factor independent 1                     | 107716655 | 107726036 | TC0500002932.mm.1  | -0.3 | 0.026325 |
| TC0400001229.mm.1 | ENSMUST00000099418 | Gm10770 | predicted gene 10770                            | 150178882 | 150179679 | TC0200004829.mm.1  | -0.3 | 0.026327 |
| TC0400001230.mm.1 | NM_010930          | Nov     | nephroblastoma overexpressed gene               | 54745702  | 54754039  | TC1500000389.mm.1  | 0.2  | 0.026438 |
| TC0400001235.mm.1 | XR_141249          | D130046 | RIKEN cDNA D130046C19 gene                      | 26840249  | 26841654  | TC1500001294.mm.1  | 0.2  | 0.026446 |
| TC0400001238.mm.1 | NM_153550          | Dir2    | disrupted in renal carcinoma 2 (human)          | 35694062  | 35769356  | TC1600001553.mm.1  | 0.2  | 0.026456 |
| TC0400001253.mm.1 | NM_183160          | Tmem252 | transmembrane protein 252                       | 24674005  | 24679661  | TC1900000397.mm.1  | 0.1  | 0.026497 |
| TC0400001258.mm.1 | NM_018859          | Akr1e1  | aldo-keto reductase family 1, member E1         | 4590757   | 4609174   | TC1300001383.mm.1  | 0.4  | 0.026549 |
| TC0400001271.mm.1 | NM_021475          | Adamdec | ADAM-like, decysin 1                            | 68563380  | 68582086  | TC1400002302.mm.1  | -0.4 | 0.026599 |
| TC0400001273.mm.1 | ENSMUST00000118231 | Gm13469 | predicted gene 13469                            | 46406220  | 46406569  | TC0200003484.mm.1  | -0.2 | 0.026607 |
| TC0400001275.mm.1 | NM_013654          | Ccl7    | chemokine (C-C motif) ligand 7                  | 82045712  | 82047525  | TC1100001220.mm.1  | 0.3  | 0.026621 |
| TC0400001283.mm.1 | ENSMUST00000158437 | Gm22838 | predicted gene, 22838                           | 99928283  | 99928381  | TC05000002825.mm.1 | 0.3  | 0.026664 |
| TC0400001284.mm.1 | NM_001025244       | Krtap31 | keratin associated protein 31-2                 | 99936291  | 99937225  | TC1100001612.mm.1  | 0.1  | 0.026652 |
| TC0400001294.mm.1 | NM_008947          | Psmc1   | protease (prosome, macropain) 26S subunit, ATf  | 100110168 | 100123365 | TC1200000990.mm.1  | -0.4 | 0.026683 |
| TC0400001324.mm.1 | BC104361           | Hddc2   | HD domain containing 2                          | 31313382  | 31328204  | TC1000000279.mm.1  | -0.1 | 0.026708 |
| TC0400001325.mm.1 | XR_105545          | Gm4130  | predicted gene 4130                             | 91261430  | 91262672  | TC13000002410.mm.1 | -0.5 | 0.026746 |
| TC0400001326.mm.1 | NM_153585          | Cnot10  | CCR4-NOT transcription complex, subunit 10      | 114585874 | 114640200 | TC09000003172.mm.1 | -0.2 | 0.026796 |
| TC0400001327.mm.1 | NM_001161737       | Siva1   | SIVA1, apoptosis-inducing factor                | 112644828 | 112649152 | TC1200001263.mm.1  | -0.3 | 0.026806 |
| TC0400001337.mm.1 | NM_001033337       | Ttc38   | tetratricopeptide repeat domain 38              | 85832304  | 85858822  | TC1500000825.mm.1  | 0.4  | 0.026846 |
| TC0400001352.mm.1 | NM_001081043       | Ptpn23  | protein tyrosine phosphatase, non-receptor type | 110385089 | 110408210 | TC09000003110.mm.1 | 0.1  | 0.026861 |
| TC0400001358.mm.1 | ENSMUST00000175023 | Gm23362 | predicted gene, 23362                           | 149145724 | 149145821 | TC0500001841.mm.1  | -0.9 | 0.026876 |
| TC0400001374.mm.1 | NM_175370          | Als2cr1 | amyotrophic lateral sclerosis 2 (juvenile) chro | 58658117  | 58695989  | TC0100002388.mm.1  | 0.3  | 0.026919 |
| TC0400001387.mm.1 | NM_016926          | Sart3   | squamous cell carcinoma antigen recognized by   | 113742444 | 113771649 | TC0500003047.mm.1  | -0.3 | 0.026981 |
| TC0400001394.mm.1 | NM_021896          | Gucy1a3 | guanylate cyclase 1, soluble, alpha 3           | 82092427  | 82145877  | TC0300002220.mm.1  | 0.4  | 0.026982 |
| TC0400001396.mm.1 | ENSMUST00000057361 | Gm8396  | predicted gene 8396                             | 7801208   | 7802030   | TC1400000070.mm.1  | -0.5 | 0.026995 |
| TC0400001397.mm.1 | NM_026174          | Entpd4  | ectonucleoside triphosphate diphosphohydrolas   | 69337151  | 69367270  | TC1400000975.mm.1  | 0.3  | 0.027006 |
| TC0400001418.mm.1 | NM_008773          | P2ry2   | purinergic receptor P2Y, G-protein coupled 2    | 100996572 | 101012013 | TC07000003831.mm.1 | 0.2  | 0.027077 |
| TC0400001419.mm.1 | ENSMUST00000085368 | Gm5786  | predicted pseudogene 5786                       | 59081019  | 59081900  | TC1200000501.mm.1  | -0.6 | 0.027107 |
| TC0400001422.mm.1 | NCBI_Gene:637227:p | Igkv6-2 | immunoglobulin kappa variable 6-23              | 70260409  | 70260933  | TC06000003590.mm.1 | -1.2 | 0.027247 |
| TC0400001423.mm.1 | ENSMUST00000122602 | Gm24839 | predicted gene, 24839                           | 126513875 | 126513981 | TC05000003279.mm.1 | 0.3  | 0.027323 |
| TC0400001424.mm.1 | XM_001473015       | Gm2274  | predicted gene 2274                             | 26152416  | 26166181  | TC1400000255.mm.1  | 0.3  | 0.027324 |
| TC0400001429.mm.1 | NCBI_Gene:10004261 | Trav5n- | Trav5n-4 T cell receptor alpha variable 5N-4    | 53312904  | 53313422  | TC1400000683.mm.1  | -0.4 | 0.027332 |
| TC0400001430.mm.1 | NM_007931          | Endog   | endonuclease G                                  | 30171493  | 30174069  | TC0200000528.mm.1  | 0.2  | 0.027336 |
| TC0400001452.mm.1 | ENSMUST00000117560 | Gm7834  | predicted gene 7834                             | 51212511  | 51212947  | TC0X00002196.mm.1  | -0.3 | 0.027349 |
| TC0400001455.mm.1 | NM_026570          | Yeats4  | YEATS domain containing 4                       | 117215141 | 117224507 | TC1000002926.mm.1  | -0.3 | 0.027353 |
| TC0400001458.mm.1 | ENSMUST00000082666 | Gm25636 | predicted gene, 25636                           | 110023210 | 110023342 | TC0700001621.mm.1  | -1.1 | 0.027354 |
| TC0400001462.mm.1 | NM_153561          | Nudt6   | nudix (nucleoside diphosphate linked moiety X)- | 37404910  | 37420211  | TC0300001871.mm.1  | 0.1  | 0.027466 |
| TC0400001465.mm.1 | NM_009539          | Zap70   | zeta-chain (TCR) associated protein kinase      | 36761798  | 36782820  | TC0100000255.mm.1  | -0.4 | 0.027479 |
| TC0400001467.mm.1 | ENSMUST00000120127 | Amd-ps1 | S-adenosylmethionine decarboxylase, pseudoge    | 155155195 | 155156188 | TC0X00001576.mm.1  | -0.2 | 0.027498 |
| TC0400001468.mm.1 | ENSMUST00000110797 | Gm8818  | predicted pseudogene 8818                       | 153305422 | 153306478 | TC0100001375.mm.1  | -0.2 | 0.0275   |
| TC0400001469.mm.1 | NM_025736          | Emc2    | ER membrane protein complex subunit 2           | 43477229  | 43527777  | TC0500000344.mm.1  | 0.6  | 0.027522 |
| TC0400001487.mm.1 | NM_008622          | Mpv17   | Mpv17 mitochondrial inner membrane protein      | 31140660  | 31154290  | TC05000003723.mm.1 | 0.2  | 0.027557 |
| TC0400001514.mm.1 | NM_177460          | Parp16  | poly (ADP-ribose) polymerase family, member 1   | 65214690  | 65239219  | TC0900000833.mm.1  | 0.2  | 0.027557 |
| TC0400001517.mm.1 | NM_133223          | Rac3    | RAS-related C3 botulinum substrate 3            | 120721468 | 120723969 | TC1100002045.mm.1  | -0.1 | 0.027566 |
| TC0400001522.mm.1 | ENSMUST00000093758 | Gm13268 | predicted gene 13268                            | 14626880  | 14627323  | TC0200002998.mm.1  | -0.6 | 0.027575 |
| TC0400001525.mm.1 | NM_010102          | S1pr4   | sphingosine-1-phosphate receptor 4              | 81497745  | 81500137  | TC0400002545.mm.1  | -0.3 | 0.027577 |
| TC0400001541.mm.1 | ENSMUST00000072739 | Lsm7    | LSM7 homolog, U6 small nuclear RNA associat     | 78393309  | 78393756  | TC1000000783.mm.1  | -0.3 | 0.027585 |
| TC0400001543.mm.1 | BC040792           | Anpep   | alanine (membrane) aminopeptidase               | 79821803  | 79848210  | TC07000003570.mm.1 | 0.6  | 0.0277   |
| TC0400001547.mm.1 | NCBI_Gene:434028:p | Igkv1-9 | immunoglobulin kappa variable 1-99              | 68541644  | 68542422  | TC06000003522.mm.1 | -0.9 | 0.027703 |
| TC0400001550.mm.1 | NM_175655          | Hist1h4 | histone cluster 1, H4f                          | 23551258  | 23551648  | TC1300001631.mm.1  | -0.5 | 0.027754 |
| TC0400001552.mm.1 | ENSMUST00000118269 | Gm13611 | predicted gene 13611                            | 32271845  | 32272162  | TC0200000573.mm.1  | -0.6 | 0.027803 |
| TC0400001553.mm.1 | ENSMUST00000122652 | Gm23111 | predicted gene, 23111                           | 33959663  | 33959767  | TC1700000605.mm.1  | -0.2 | 0.027812 |
| TC0400001563.mm.1 | ENSMUST00000122145 | Gm11688 | predicted gene 11688                            | 144261234 | 144261541 | TC0200004757.mm.1  | -0.3 | 0.027872 |
| TC0400001570.mm.1 | NM_018750          | Rassf5  | Ras association (RalGDS/AF-6) domain family me  | 131176410 | 131245258 | TC0100003056.mm.1  | -0.3 | 0.027876 |
| TC0400001574.mm.1 | NM_008238          | Foxn1   | forkhead box N1                                 | 78357577  | 78386608  | TC1100003295.mm.1  | -0.3 | 0.027877 |
| TC0400001583.mm.1 | NM_009128          | Scd2    | stearyl-Coenzyme A desaturase 2                 | 44293676  | 44306864  | TC1900000646.mm.1  | 0.9  | 0.02805  |
| TC0400001586.mm.1 | NM_007875          | Dpagt1  | dolichyl-phosphate (UDP-N-acetylglucosamine) a  | 44326845  | 44333601  | TC0900000504.mm.1  | 0.2  | 0.028068 |
| TC0400001587.mm.1 | NM_177081          | Ptpn7   | protein tyrosine phosphatase, non-receptor type | 135132725 | 135145320 | TC0100001244.mm.1  | -0.7 | 0.028196 |
| TC0400001593.mm.1 | NM_001080557       | Vamp1   | vesicle-associated membrane protein 1           | 125215551 | 125222306 | TC06000003534.mm.1 | -0.3 | 0.028254 |
| TC0400001611.mm.1 | ENSMUST00000178837 | Gm3893  | predicted gene 3893                             | 83395     | 84475     | TC4_JH584293_rand  | 0.3  | 0.028257 |
| TC0400001615.mm.1 | ENSMUST00000157685 | Gm26183 | predicted gene, 26183                           | 11695041  | 11695179  | TC1900000228.mm.1  | -0.2 | 0.028288 |
| TC0400001631.mm.1 | XM_983460          | Gm8069  | predicted pseudogene 8069                       | 54651966  | 54652121  | TC05000002434.mm.1 | -0.3 | 0.028303 |
| TC0400001642.mm.1 | XM_003084551       | Amy2a1  | amylase 2a1                                     | 113528209 | 113532428 | TC03000002785.mm.1 | 0.2  | 0.028313 |
| TC0400001647.mm.1 | ENSMUST00000104531 | Gm25724 | predicted gene, 25724                           | 104628944 | 104629060 | TC1400002651.mm.1  | 0.3  | 0.028323 |
| TC0400001655.mm.1 | ENSMUST00000158683 | Gm24837 | predicted gene, 24837                           | 41211502  | 41211582  | TC04000002462.mm.1 | -0.9 | 0.028387 |
| TC0400001672.mm.1 | NM_001045529       | Mor3    | microrchidia 3                                  | 93832121  | 93876073  | TC1600001048.mm.1  | -0.3 | 0.028431 |
| TC0400001679.mm.1 | ENSMUST00000118749 | Gm4909  | predicted gene 4909                             | 60706270  | 60707063  | TC0X00002315.mm.1  | -0.2 | 0.028515 |
| TC0400001681.mm.1 | ENSMUST00000157903 | Gm26084 | predicted gene, 26084                           | 41345848  | 41345951  | TC0400002466.mm.1  | -0.1 | 0.028574 |
| TC0400001698.mm.1 | ENSMUST00000179193 | Gm6762  | predicted pseudogene 6762                       | 35574110  | 35574400  | TC09000002019.mm.1 | 0.2  | 0.028602 |
| TC0400001699.mm.1 | NM_019793          | Tspan3  | tetraspanin 3                                   | 56131725  | 56161070  | TC02000002346.mm.1 | 0.3  | 0.028616 |
| TC0400001700.mm.1 | ENSMUST00000118978 | Gm13127 | predicted gene 13127                            | 144587244 | 144588632 | TC0400001853.mm.1  | -0.4 | 0.028619 |
| TC0400001702.mm.1 | XM_986941          | Ms4a4a  | membrane-spanning 4-domains, subfamily A, m     | 11375523  | 11393315  | TC1900000216.mm.1  | 0.2  | 0.028626 |
| TC0400001706.mm.1 | NM_080433          | Fezf2   | Fez family zinc finger 2                        | 12341892  | 12345865  | TC1400001455.mm.1  | -0.3 | 0.028675 |
| TC0400001722.mm.1 | ENSMUST00000086725 | Gm3608  | predicted gene 3608                             | 105455971 | 105458829 | TC0100001005.mm.1  | -0.7 | 0.028715 |
| TC0400001726.mm.1 | NM_026456          | Tceb1   | transcription elongation factor B (SIII), polyp | 16642765  | 16657042  | TC0100002008.mm.1  | -0.4 | 0.02874  |
| TC0400001733.mm.1 | ENSMUST00000077997 | Gm16380 | predicted pseudogene 16380                      | 53884082  | 53884561  | TC0900000649.mm.1  | -0.2 | 0.028744 |
| TC0400001737.mm.1 | XR_106131          | Gm20269 | predicted gene, 20269                           | 121840149 | 121841816 | TC0800001472.mm.1  | -0.2 | 0.028812 |
| TC0400001738.mm.1 | ENSMUST00000183894 | AC11645 | N/A                                             | 49709794  | 49709872  | TC1900001647.mm.1  | -0.9 | 0.028907 |

|                   |                     |         |                                                 |           |           |                   |      |          |
|-------------------|---------------------|---------|-------------------------------------------------|-----------|-----------|-------------------|------|----------|
| TC0400001743.mm.1 | NM_007990           | Fau     | Finkel-Biskis-Reilly murine sarcoma virus (FBR- | 6057888   | 6059524   | TC1900000096.mm.1 | -0.4 | 0.028933 |
| TC0400001745.mm.1 | NCBI_Gene:667660:p  | Trav9n- | Trav9n-2 T cell receptor alpha variable 9N-2    | 53202954  | 53203644  | TC1400000670.mm.1 | -0.6 | 0.028968 |
| TC0400001746.mm.1 | NM_010362           | Gsto1   | glutathione S-transferase omega 1               | 47854970  | 47864791  | TC1900000727.mm.1 | 0.4  | 0.029007 |
| TC0400001765.mm.1 | NM_016697           | Gpc3    | glypican 3                                      | 52272426  | 52613974  | TC0X00002211.mm.1 | 0.5  | 0.029016 |
| TC0400001766.mm.1 | ENSMUST00000120029  | Gm6263  | predicted gene 6263                             | 74018793  | 74020134  | TC1300002310.mm.1 | 0.2  | 0.029061 |
| TC0400001771.mm.1 | ENSMUST00000083063  | Pgk1    | phosphoglycerate kinase 1                       | 62543203  | 62543335  | TC1300002167.mm.1 | -0.4 | 0.029063 |
| TC0400001776.mm.1 | NM_008828           | Atp6v0d | ATPase, H+ transporting, lysosomal V0 subunit D | 106187100 | 106203699 | TC0X00001071.mm.1 | -0.3 | 0.029088 |
| TC0400001779.mm.1 | NM_013477           | Traj46  | T cell receptor alpha joining 46                | 105524465 | 105566047 | TC0800002824.mm.1 | 0.4  | 0.029092 |
| TC0400001780.mm.1 | NCBI_Gene:10012434  | NAMA_1  | MAP kinase and growth arrest RNA conserved re   | 54172336  | 54172398  | TC1400000730.mm.1 | -0.3 | 0.029101 |
| TC0400001786.mm.1 | ENSMUST00000184794  | Rpl26-p | ribosomal protein L26, pseudogene 5             | 47593337  | 47593463  | TC0400000524.mm.1 | 0.2  | 0.029108 |
| TC0400001790.mm.1 | ENSMUST00000122220  | Il2rb   | interleukin 2 receptor, beta chain              | 142570508 | 142570966 | TC0200002122.mm.1 | -0.1 | 0.029114 |
| TC0400001823.mm.1 | NM_008368           | Xlr4e-p | X-linked lymphocyte-regulated 4E, pseudogene    | 78480548  | 78495066  | TC1500001833.mm.1 | -0.3 | 0.029178 |
| TC0400001833.mm.1 | ENSMUST00000122102  | Spcs2   | signal peptidase complex subunit 2 homolog (S.  | 74944963  | 74952044  | TC0X00000732.mm.1 | -0.4 | 0.029208 |
| TC0400001845.mm.1 | NM_025668           | Tnfaip1 | tumor necrosis factor, alpha-induced protein 1  | 99837569  | 99858893  | TC0700003807.mm.1 | -0.3 | 0.029231 |
| TC0400001847.mm.1 | NM_009395           | Trav9n- | T cell receptor alpha variable 9N-4             | 78522850  | 78536332  | TC1100003299.mm.1 | 0.4  | 0.029271 |
| TC0400001853.mm.1 | NCBI_Gene:279882:p  | Gm24150 | predicted gene, 24150                           | 53294533  | 53296227  | TC1400000681.mm.1 | -0.8 | 0.029346 |
| TC0400001855.mm.1 | ENSMUST000000082759 | Mnf1    | mitochondrial nucleoid factor 1                 | 79196374  | 79196477  | TC0300000618.mm.1 | -0.3 | 0.029371 |
| TC0400001860.mm.1 | NM_026063           | Pcsk5   | proprotein convertase subtilisin/kexin type 5   | 27122663  | 27133916  | TC1700001716.mm.1 | -0.1 | 0.029413 |
| TC0400001862.mm.1 | NM_001190483        | Hist1h3 | histone cluster 1, H3c                          | 17432832  | 17837632  | TC1900001219.mm.1 | 0.1  | 0.02942  |
| TC0400001863.mm.1 | NM_175653           | Gm15772 | predicted gene 15772                            | 23744973  | 23745602  | TC1300001642.mm.1 | -0.6 | 0.029432 |
| TC0400001866.mm.1 | ENSMUST00000078810  | mmu-mir | mmu-mir-6989                                    | 3236389   | 3236907   | TC0500000005.mm.1 | -0.4 | 0.029432 |
| TC0400001868.mm.1 | ENSMUST00000184812  | Kctd5   | potassium channel tetramerisation domain cont   | 6346480   | 6346544   | TC1900000115.mm.1 | -0.2 | 0.029462 |
| TC0400001869.mm.1 | NM_027008           | Gm12418 | predicted gene 12418                            | 24047720  | 24073485  | TC1700001614.mm.1 | -0.2 | 0.029543 |
| TC0400001871.mm.1 | ENSMUST00000118116  | U2af2   | U2 small nuclear ribonucleoprotein auxiliary fa | 84915896  | 84916837  | TC0400000850.mm.1 | -0.2 | 0.029584 |
| TC0400001876.mm.1 | NM_133671           | Polh    | polymerase (DNA directed), eta (RAD 30 related) | 5062143   | 5079945   | TC0700000057.mm.1 | -0.5 | 0.029617 |
| TC0400001880.mm.1 | NM_030715           | Tex264  | testis expressed gene 264                       | 46171993  | 46202625  | TC1700002167.mm.1 | -0.5 | 0.029629 |
| TC0400001885.mm.1 | NM_011573           | Gm25982 | predicted gene, 25982                           | 156023058 | 156023158 | TC0400004165.mm.1 | 0.3  | 0.029643 |
| TC0400001886.mm.1 | ENSMUST00000157920  | Hoxd8   | homeobox D8                                     | 74704615  | 74707933  | TC0200001096.mm.1 | 0.1  | 0.029644 |
| TC0400001887.mm.1 | NM_008276           | Rcor3   | REST corepressor 3 (Rcor3), transcript variant  | 0         | 0         | TSUnmapped0000000 | 0.1  | 0.029655 |
| TC0400001891.mm.1 | NM_001290280        | Rps11-p | ribosomal protein S11, pseudogene 4             | 51297487  | 51297963  | TC1200000414.mm.1 | -0.4 | 0.029697 |
| TC0400001892.mm.1 | ENSMUST00000062226  | Gm5558  | predicted gene 5558                             | 91806576  | 91807073  | TC0500002740.mm.1 | -0.4 | 0.029739 |
| TC0400001896.mm.1 | ENSMUST00000178933  | 1-Mar   | mitochondrial amidoxime reducing component 1    | 184786767 | 184811313 | TC0100003738.mm.1 | 0.5  | 0.029862 |
| TC0400001901.mm.1 | NM_001081361        | Lenep   | lens epithelial protein                         | 89400988  | 89411870  | TC0300002351.mm.1 | 0.2  | 0.029874 |
| TC0400001902.mm.1 | NM_020517           | Gm12527 | predicted gene 12527                            | 59368303  | 59368866  | TC0400002756.mm.1 | -0.2 | 0.029901 |
| TC0400001903.mm.1 | ENSMUST00000117967  | Gm7927  | predicted gene 7927                             | 55845759  | 55846638  | TC0X00002258.mm.1 | -0.4 | 0.029922 |
| TC0400001909.mm.1 | ENSMUST00000118818  | Gm24507 | predicted gene, 24507                           | 90098981  | 90099114  | TC1300001013.mm.1 | -0.6 | 0.029955 |
| TC0400001920.mm.1 | ENSMUST00000157683  | Gpr65   | G-protein coupled receptor 65                   | 98268635  | 98276722  | TC1200000959.mm.1 | -0.4 | 0.029959 |
| TC0400001926.mm.1 | NM_008152           | Gm11168 | predicted gene 11168                            | 3003346   | 3006948   | TC0900000002.mm.1 | 0.7  | 0.029994 |
| TC0400001930.mm.1 | ENSMUST00000177722  | Cd96    | CD96 antigen                                    | 46035657  | 46120251  | TC1600001675.mm.1 | -1.1 | 0.03007  |
| TC0400001932.mm.1 | NM_032465           | Arfg1   | ArfGAP with FG repeats 1                        | 82839446  | 82896275  | TC0100000711.mm.1 | -0.2 | 0.030143 |
| TC0400001947.mm.1 | NM_010472           | Trbv3   | T cell receptor beta, variable 3                | 41048298  | 41048830  | TC0600000420.mm.1 | -1.3 | 0.030161 |
| TC0400001953.mm.1 | NCBI_Gene:10003979  | Park2   | Parkinson disease (autosomal recessive, juvenil | 10840384  | 12063361  | TC1700000110.mm.1 | 0.1  | 0.030198 |
| TC0400001964.mm.1 | NM_016694           | Gm23416 | predicted gene, 23416                           | 87068993  | 87069087  | TC1500000839.mm.1 | 0.4  | 0.030238 |
| TC0400001970.mm.1 | ENSMUST00000175520  | Rab9b   | RAB9B, member RAS oncogene family               | 136858147 | 136868755 | TC0X00003041.mm.1 | 0.2  | 0.030262 |
| TC0400001977.mm.1 | NM_176971           | Gm5453  | predicted gene 5453                             | 98904224  | 98904670  | TC1300001122.mm.1 | -0.5 | 0.030361 |
| TC0400001993.mm.1 | XM_484309           | Rac2    | RAS-related C3 botulinum substrate 2            | 78559169  | 78572783  | TC1500001838.mm.1 | -1.3 | 0.030391 |
| TC0400002010.mm.1 | NM_009008           | Lrpap1  | low density lipoprotein receptor-related protei | 35091490  | 35105766  | TC0500002244.mm.1 | 0.5  | 0.030403 |
| TC0400002011.mm.1 | NM_013587           | Trav4-4 | T cell receptor alpha variable 4-4-DV10         | 53683647  | 53684177  | TC1400002826.mm.1 | -0.4 | 0.030425 |
| TC0400002035.mm.1 | NCBI_Gene:10011341  | Trav9d- | Trav9d-3 T cell receptor alpha variable 9D-3    | 52920502  | 52922377  | TC1400000644.mm.1 | -0.5 | 0.030441 |
| TC0400002040.mm.1 | NCBI_Gene:10003885  | Slc2a1  | solute carrier family 2 (facilitated glucose tr | 119108711 | 119137330 | TC0400001325.mm.1 | -0.2 | 0.030453 |
| TC0400002041.mm.1 | NM_011400           | Mlf2    | myeloid leukemia factor 2                       | 124931388 | 124937238 | TC0600001436.mm.1 | 0.3  | 0.030454 |
| TC0400002057.mm.1 | NM_145385           | S1pr1   | sphingosine-1-phosphate receptor 1              | 115710433 | 115715055 | TC0300002797.mm.1 | 0.4  | 0.030495 |
| TC0400002063.mm.1 | NM_007901           | Gm5883  | predicted gene 5883                             | 123218953 | 123219447 | TC0600003083.mm.1 | -0.4 | 0.030548 |
| TC0400002077.mm.1 | ENSMUST00000120735  | Knstrn  | kinetochore-localized astrin/SPAG5 binding      | 118814003 | 118853957 | TC0200001748.mm.1 | -0.4 | 0.030619 |
| TC0400002081.mm.1 | NM_026412           | Cdh1    | cadherin 1                                      | 106603351 | 106670246 | TC0800001255.mm.1 | -0.4 | 0.03068  |
| TC0400002089.mm.1 | NM_009864           | Gm24433 | predicted gene, 24433                           | 95898603  | 95898735  | TC1000001170.mm.1 | 0.3  | 0.030692 |
| TC0400002091.mm.1 | ENSMUST00000104080  | Cenpn   | centromere protein N                            | 116921740 | 116941504 | TC0800001390.mm.1 | -0.5 | 0.030729 |
| TC0400002099.mm.1 | NM_028131           | Gm24438 | predicted gene, 24438                           | 116748842 | 116748956 | TC0X00001160.mm.1 | -1.0 | 0.030779 |
| TC0400002116.mm.1 | ENSMUST00000157893  | Gm13559 | predicted gene 13559                            | 58740639  | 58741501  | TC0200000885.mm.1 | -0.3 | 0.030784 |
| TC0400002119.mm.1 | ENSMUST00000120476  | Utp14a  | UTP14, U3 small nucleolar ribonucleoprotein, hc | 48256862  | 48282453  | TC0X00000429.mm.1 | -0.2 | 0.030788 |
| TC0400002124.mm.1 | NM_028276           | Trav6d- | T cell receptor alpha variable 6D-6             | 52821860  | 52822359  | TC1400000631.mm.1 | -0.4 | 0.03079  |
| TC0400002125.mm.1 | NCBI_Gene:10004244  | Pglyrp2 | peptidoglycan recognition protein 2             | 32412461  | 32424167  | TC1700001846.mm.1 | -0.3 | 0.030802 |
| TC0400002130.mm.1 | NM_001271477        | Il17ra  | interleukin 17 receptor A                       | 120463197 | 120483727 | TC0600001347.mm.1 | -0.6 | 0.030822 |
| TC0400002134.mm.1 | NM_008359           | Ucp3    | uncoupling protein 3 (mitochondrial, proton car | 100472990 | 100486432 | TC0700001408.mm.1 | 0.2  | 0.030837 |
| TC0400002148.mm.1 | NM_009464           | Trav4n- | Trav4n-4 T cell receptor alpha variable 4N-4    | 53302036  | 53302560  | TC1400002824.mm.1 | -0.5 | 0.030844 |
| TC0400002158.mm.1 | NCBI_Gene:10004260  | Rpl10-p | ribosomal protein L10, pseudogene 2             | 106927769 | 106928413 | TC0800002863.mm.1 | -0.2 | 0.03093  |
| TC0400002175.mm.1 | ENSMUST00000098432  | Ifit43  | intraflagellar transport 43 homolog (Chlamydom  | 86082561  | 86162459  | TC1200000846.mm.1 | 0.1  | 0.031117 |
| TC0400002176.mm.1 | NM_029601           | Cd8a    | CD8 antigen, alpha chain                        | 71373427  | 71379171  | TC0600000827.mm.1 | -1.9 | 0.03113  |
| TC0400002193.mm.1 | NM_001081110        | Arhgap1 | Rho GTPase activating protein 18                | 26753421  | 26918650  | TC0100000437.mm.1 | -0.6 | 0.031151 |
| TC0400002196.mm.1 | NM_176837           | LOC1008 | chromobox protein homolog 3-like // predicted   | 58646608  | 58648317  | TC0100000308.mm.1 | -0.2 | 0.031169 |
| TC0400002207.mm.1 | ENSMUST00000081455  | Aph1c   | anterior pharynx defective 1c homolog (C. eleg  | 66814994  | 66834726  | TC0900002532.mm.1 | 0.2  | 0.031166 |
| TC0400002216.mm.1 | BC063254            | Gm14368 | predicted gene 14368                            | 4341036   | 4343915   | TC0X00001737.mm.1 | -0.4 | 0.031169 |
| TC0400002223.mm.1 | ENSMUST00000145305  | Tmem183 | transmembrane protein 183A                      | 134346097 | 134361999 | TC0100003108.mm.1 | -0.2 | 0.031169 |
| TC0400002227.mm.1 | NM_020588           | Rbm10   | RNA binding motif protein 10                    | 20617503  | 20650905  | TC0X00000210.mm.1 | -0.3 | 0.03121  |
| TC0400002229.mm.1 | NM_001167775        | Naglu   | alpha-N-acetylglucosaminidase (Sanfilippo disea | 101069877 | 101077672 | TC1100001638.mm.1 | 0.2  | 0.031214 |
| TC0400002236.mm.1 | NM_013792           | Gm13435 | predicted gene 13435                            | 37207051  | 37208073  | TC0200000681.mm.1 | -0.2 | 0.031242 |
| TC0400002242.mm.1 | ENSMUST00000120111  | uc_338  | TUC338                                          | 86651170  | 86651254  | TC1200000853.mm.1 | -1.2 | 0.031255 |
| TC0400002243.mm.1 | ENSMUST00000184362  |         |                                                 |           |           |                   |      |          |

|                   |                    |          |                                                      |           |           |                   |      |          |
|-------------------|--------------------|----------|------------------------------------------------------|-----------|-----------|-------------------|------|----------|
| TC0400002250.mm.1 | NM_001177568       | Gm14420  | predicted gene 14420                                 | 177464733 | 177479194 | TC0200002748.mm.1 | 0.7  | 0.031263 |
| TC0400002251.mm.1 | NM_138593          | Larp7    | La ribonucleoprotein domain family, member 7         | 127154346 | 127553349 | TC0300002906.mm.1 | -0.4 | 0.031289 |
| TC0400002252.mm.1 | NM_001170954       | A4galt   | alpha 1,4-galactosyltransferase                      | 83226722  | 83251774  | TC1500001968.mm.1 | 0.1  | 0.031334 |
| TC0400002254.mm.1 | NM_146106          | Lyplal1  | lysophospholipase-like 1                             | 186087731 | 186117310 | TC0100003751.mm.1 | 0.6  | 0.031349 |
| TC0400002265.mm.1 | NM_027978          | Coq2     | coenzyme Q2 homolog, prenyltransferase (yeast        | 100654691 | 100675140 | TC0500002842.mm.1 | 0.2  | 0.031357 |
| TC0400002275.mm.1 | XM_001475503       | Gm10362  | predicted gene 10362                                 | 73428317  | 73471359  | TC1500001697.mm.1 | -0.1 | 0.031375 |
| TC0400002302.mm.1 | ENSMUST00000082812 | Gm24707  | predicted gene, 24707                                | 15412300  | 15412406  | TC1100000151.mm.1 | -0.2 | 0.031393 |
| TC0400002308.mm.1 | NR_038088          | Bc1      | brain cytoplasmic RNA 1                              | 144914470 | 144914623 | TC0700002115.mm.1 | 0.7  | 0.031404 |
| TC0400002315.mm.1 | NM_175563          | Prr11    | proline rich 11                                      | 87089153  | 87108714  | TC1100003470.mm.1 | -0.4 | 0.031431 |
| TC0400002316.mm.1 | ENSMUST00000158362 | Gm25602  | predicted gene, 25602                                | 54712976  | 54713037  | TC1000002182.mm.1 | -0.2 | 0.031489 |
| TC0400002320.mm.1 | ENSMUST00000115904 | CR97458  | N/A                                                  | 103128    | 104629    | TC4_JH584293_rand | -0.2 | 0.031584 |
| TC0400002327.mm.1 | NCBI_Gene:10012434 | Traj47   | Traj47 T cell receptor alpha joining 47              | 54171797  | 54171856  | TC1400000729.mm.1 | -0.9 | 0.031642 |
| TC0400002328.mm.1 | NM_011514          | Suv39h1  | suppressor of variegation 3-9 homolog 1 (Drosophila) | 8061171   | 8074760   | TC0X00001793.mm.1 | -0.2 | 0.031652 |
| TC0400002338.mm.1 | NR_028568          | Scarna9  | small Cajal body-specific RNA 9                      | 15326264  | 15326333  | TC0900001787.mm.1 | -1.1 | 0.031742 |
| TC0400002339.mm.1 | NM_001113283       | Fam214a  | family with sequence similarity 214, member A        | 74952884  | 75032468  | TC0900001005.mm.1 | 0.3  | 0.031748 |
| TC0400002350.mm.1 | NM_177688          | H2afj    | H2A histone family, member J                         | 136808244 | 136810074 | TC0600001628.mm.1 | -0.3 | 0.031759 |
| TC0400002359.mm.1 | NM_177606          | Plekhh2  | pleckstrin homology domain containing, family 1      | 84511895  | 84622142  | TC1700001262.mm.1 | 0.3  | 0.031768 |
| TC0400002365.mm.1 | NM_177411          | Rab5b    | RAB5B, member RAS oncogene family                    | 128677179 | 128696268 | TC1000003159.mm.1 | 0.2  | 0.031809 |
| TC0400002377.mm.1 | NM_199311          | Clec4a1  | C-type lectin domain family 4, member a1             | 122921848 | 122934619 | TC0600001397.mm.1 | 0.5  | 0.031975 |
| TC0400002382.mm.1 | NM_146550          | Olfir810 | olfactory receptor 810                               | 129790609 | 129791614 | TC1000003191.mm.1 | -0.2 | 0.032004 |
| TC0400002404.mm.1 | NCBI_Gene:626545:p | Trdv5    | T cell receptor delta variable 5                     | 54148662  | 54149294  | TC1400002049.mm.1 | -0.4 | 0.032028 |
| TC0400002414.mm.1 | XM_204772          | Gm5068   | predicted gene 5068                                  | 73949004  | 73961447  | TC0200000654.mm.1 | 0.1  | 0.032077 |
| TC0400002418.mm.1 | NM_026793          | Myct1    | myc target 1                                         | 5593728   | 5606791   | TC1000000035.mm.1 | 0.4  | 0.032097 |
| TC0400002425.mm.1 | NM_013738          | Plek2    | pleckstrin 2                                         | 78888691  | 78906964  | TC1200001972.mm.1 | -0.3 | 0.032111 |
| TC0400002431.mm.1 | XM_001004798       | Gm9178   | predicted gene 9178                                  | 20417704  | 20418441  | TC1200000176.mm.1 | -0.2 | 0.032123 |
| TC0400002432.mm.1 | NM_028986          | Gzf1     | GDNF-inducible zinc finger protein 1                 | 148681023 | 148692949 | TC0200002197.mm.1 | 0.2  | 0.032149 |
| TC0400002433.mm.1 | NM_001024955       | Pik3r1   | phosphatidylinositol 3-kinase, regulatory subunit    | 101680761 | 101768217 | TC1300002553.mm.1 | 0.5  | 0.032175 |
| TC0400002436.mm.1 | ENSMUST00000053686 | Uck2     | uridine-cytidine kinase 2                            | 167223827 | 167223919 | TC0100003477.mm.1 | -0.3 | 0.032186 |
| TC0400002437.mm.1 | NM_177603          | Frat2    | frequently rearranged in advanced T cell lymphoma    | 41845972  | 41848132  | TC1900001511.mm.1 | -0.2 | 0.032279 |
| TC0400002441.mm.1 | NM_001004156       | Plekhh5  | pleckstrin homology domain containing, family C      | 152072498 | 152115404 | TC0400002011.mm.1 | 0.1  | 0.032371 |
| TC0400002448.mm.1 | NM_001195090       | Tmc8     | transmembrane channel-like gene family 8             | 117782076 | 117793137 | TC1100001969.mm.1 | -0.3 | 0.032402 |
| TC0400002450.mm.1 | ENSMUST00000089430 | Uba52    | ubiquitin A-52 residue ribosomal protein fusion      | 3973092   | 3973595   | TC0400002134.mm.1 | -0.5 | 0.032482 |
| TC0400002451.mm.1 | NM_001111099       | Cdkn1a   | cyclin-dependent kinase inhibitor 1A (P21)           | 29090979  | 29100722  | TC1700000496.mm.1 | 0.7  | 0.032595 |
| TC0400002452.mm.1 | NM_183390          | Klhl6    | kelch-like 6                                         | 19946492  | 19983049  | TC1600001337.mm.1 | -0.8 | 0.032627 |
| TC0400002454.mm.1 | NM_207213          | Snx25    | sorting nexin 25                                     | 46033261  | 46152159  | TC0800002154.mm.1 | -0.2 | 0.032703 |
| TC0400002455.mm.1 | NM_023735          | Acr3     | ARP3 actin-related protein 3                         | 125392905 | 125435727 | TC0100002993.mm.1 | -0.4 | 0.032717 |
| TC0400002456.mm.1 | ENSMUST00000060640 | Gm7984   | predicted gene 7984                                  | 75398511  | 75399048  | TC0800000849.mm.1 | -0.3 | 0.032725 |
| TC0400002457.mm.1 | ENSMUST00000119822 | Gm13408  | predicted gene 13408                                 | 34564999  | 34565796  | TC0200000616.mm.1 | -0.7 | 0.032762 |
| TC0400002461.mm.1 | ENSMUST00000117232 | Gm8216   | predicted gene 8216                                  | 144847683 | 144848283 | TC0X00001429.mm.1 | -0.2 | 0.032844 |
| TC0400002462.mm.1 | NM_010658          | Mafb     | v-maf musculoaponeurotic fibrosarcoma oncogene       | 160363677 | 160367065 | TC0200005052.mm.1 | 0.3  | 0.032861 |
| TC0400002466.mm.1 | NM_145624          | Zfp709   | zinc finger protein 709                              | 71892068  | 71892565  | TC0800000803.mm.1 | -0.2 | 0.032928 |
| TC0400002469.mm.1 | NM_024219          | Hsbp1    | heat shock factor binding protein 1                  | 119344538 | 119348929 | TC0800001418.mm.1 | 0.6  | 0.032928 |
| TC0400002477.mm.1 | ENSMUST00000111976 | Cfh      | complement component factor h                        | 140085855 | 140183411 | TC0100003193.mm.1 | 1.0  | 0.032974 |
| TC0400002483.mm.1 | NM_177201          | Phf8     | PHD finger protein 8                                 | 151520672 | 151633859 | TC0X00001520.mm.1 | 0.2  | 0.032986 |
| TC0400002486.mm.1 | ENSMUST00000095633 | Gm5145   | predicted pseudogene 5145                            | 20570362  | 20571198  | TC1700000248.mm.1 | -0.2 | 0.033035 |
| TC0400002488.mm.1 | NM_026111          | Qpctl    | glutaminyl-peptide cyclotransferase-like             | 19140217  | 19149206  | TC0700002471.mm.1 | 0.4  | 0.03305  |
| TC0400002489.mm.1 | NM_181277          | Col14a1  | collagen, type XIV, alpha 1                          | 55307750  | 55520803  | TC1500000395.mm.1 | 0.4  | 0.033063 |
| TC0400002490.mm.1 | ENSMUST00000116755 | Gm23651  | predicted gene, 23651                                | 10482812  | 10482931  | TC0200000124.mm.1 | -0.2 | 0.033115 |
| TC0400002495.mm.1 | NR_028561          | Snord45  | small nucleolar RNA, C/D box 45B                     | 153910563 | 153910633 | TC0300003171.mm.1 | -1.4 | 0.033132 |
| TC0400002498.mm.1 | NM_013632          | Pnp      | purine-nucleoside phosphorylase                      | 50944302  | 50965237  | TC1400000574.mm.1 | 0.4  | 0.033185 |
| TC0400002500.mm.1 | NM_146162          | Tmem119  | transmembrane protein 119                            | 113793729 | 113800516 | TC0500003048.mm.1 | 0.2  | 0.03322  |
| TC0400002502.mm.1 | NM_033613          | Dom3z    | DOM-3 homolog Z (C. elegans)                         | 34837019  | 34839233  | TC1700000646.mm.1 | 0.1  | 0.033228 |
| TC0400002503.mm.1 | NM_001033284       | BC02658  | cDNA sequence BC026585                               | 157458580 | 157489062 | TC0100001433.mm.1 | 0.4  | 0.033231 |
| TC0400002506.mm.1 | NM_001013769       | Rsl1     | regulator of sex limited protein 1                   | 67173182  | 67183499  | TC1300000818.mm.1 | -0.3 | 0.033237 |
| TC0400002516.mm.1 | ENSMUST00000119744 | Psmb5-p  | proteasome (prosome, macropain) subunit, beta        | 102659128 | 102659925 | TC1100003850.mm.1 | -0.2 | 0.033272 |
| TC0400002518.mm.1 | NM_001081359       | Ubr5     | ubiquitin protein ligase E3 component n-recognin     | 37967328  | 38078854  | TC1500001403.mm.1 | 0.3  | 0.033321 |
| TC0400002522.mm.1 | ENSMUST00000117774 | Gm14107  | predicted gene 14107                                 | 147642848 | 147643177 | TC0200004797.mm.1 | -0.2 | 0.033371 |
| TC0400002529.mm.1 | NCBI_Gene:10012646 | Trav6-5  | T cell receptor alpha variable 6-5                   | 53491115  | 53491622  | TC1400000697.mm.1 | -0.6 | 0.033379 |
| TC0400002532.mm.1 | NM_201363          | Serpinb  | serine (or cysteine) peptidase inhibitor, clade B    | 107271201 | 107278371 | TC0100003885.mm.1 | -0.1 | 0.033436 |
| TC0400002544.mm.1 | ENSMUST00000182350 | Xcr1     | chemokine (C motif) receptor 1                       | 123852315 | 123862029 | TC0900003312.mm.1 | -0.2 | 0.033508 |
| TC0400002550.mm.1 | XR_140431          | Gm5526   | myosin, light polypeptide 6, alkali, smooth muscle   | 45857132  | 45857787  | TC0100002283.mm.1 | 0.5  | 0.03353  |
| TC0400002560.mm.1 | NM_001168240       | Irak1bp  | interleukin-1 receptor-associated kinase 1 binding   | 82829806  | 82847688  | TC0900001083.mm.1 | 0.2  | 0.033566 |
| TC0400002568.mm.1 | NM_009126          | Serpinb  | serine (or cysteine) peptidase inhibitor, clade B    | 107045587 | 107052337 | TC0100002903.mm.1 | -0.4 | 0.033585 |
| TC0400002570.mm.1 | NM_020561          | Smpd13a  | sphingomyelin phosphodiesterase, acid-like 3A        | 57794335  | 57811830  | TC1000000509.mm.1 | 0.6  | 0.033592 |
| TC0400002572.mm.1 | NM_011896          | Spry1    | sprouty homolog 1 (Drosophila)                       | 37639947  | 37644599  | TC0300000288.mm.1 | 0.2  | 0.033612 |
| TC0400002592.mm.1 | NR_002843          | Rnu3b4   | U3B small nuclear RNA 4                              | 0         | 0         | TSUnmapped0000013 | -0.9 | 0.033613 |
| TC0400002593.mm.1 | NM_001113355       | Vps26a   | vacuolar protein sorting 26 homolog A (yeast)        | 62454843  | 62486805  | TC1000002259.mm.1 | 0.2  | 0.033674 |
| TC0400002599.mm.1 | XM_001478256       | Gm3837   | predicted gene 3837                                  | 189277308 | 189277823 | TC0100003780.mm.1 | -0.4 | 0.033701 |
| TC0400002601.mm.1 | NM_008908          | Ppic     | peptidylprolyl isomerase C                           | 53406341  | 53418022  | TC1800001338.mm.1 | 0.7  | 0.033715 |
| TC0400002624.mm.1 | ENSMUST00000100510 | Gm16409  | predicted gene 16409                                 | 73796541  | 73797290  | TC1400002398.mm.1 | -0.9 | 0.03375  |
| TC0400002630.mm.1 | NM_026119          | Med4     | mediator of RNA polymerase II transcription, subunit | 73510049  | 73518545  | TC1400001035.mm.1 | -0.4 | 0.03376  |
| TC0400002631.mm.1 | NM_178201          | Hist1h2  | histone cluster 1, H2bn                              | 21754123  | 21754503  | TC1300000177.mm.1 | -1.2 | 0.033787 |
| TC0400002633.mm.1 | ENSMUST00000116999 | Gm26156  | predicted gene, 26156                                | 10499204  | 10499326  | TC0200000164.mm.1 | -0.2 | 0.033827 |
| TC0400002637.mm.1 | NM_053191          | Pi15     | peptidase inhibitor 15                               | 17601901  | 17630939  | TC1000000112.mm.1 | 0.2  | 0.033855 |
| TC0400002645.mm.1 | ENSMUST00000104431 | Gm25495  | predicted gene, 25495                                | 90356387  | 90356517  | TC1400001138.mm.1 | -0.2 | 0.034093 |
| TC0400002650.mm.1 | ENSMUST00000120241 | Rpl17-p  | ribosomal protein L17, pseudogene 4                  | 63895545  | 63896099  | TC0400002810.mm.1 | -0.7 | 0.034098 |
| TC0400002653.mm.1 | ENSMUST00000120962 | Gm13310  | predicted gene 13310                                 | 12082612  | 12084003  | TC0200002971.mm.1 | -0.3 | 0.034098 |
| TC0400002660.mm.1 | NM_019743          | Rybp     | RING1 and YY1 binding protein                        | 100228565 | 100287441 | TC0600002853.mm.1 | -0.1 | 0.034138 |

|                   |                    |         |                                                 |           |           |                    |      |          |
|-------------------|--------------------|---------|-------------------------------------------------|-----------|-----------|--------------------|------|----------|
| TC0400002683.mm.1 | NM_001170911       | Prr13   | proline rich 13                                 | 102459028 | 102462806 | TC1500001101.mm.1  | 0.3  | 0.034208 |
| TC0400002685.mm.1 | NM_023258          | Pycard  | PYD and CARD domain containing                  | 127993867 | 127993867 | TC0700004351.mm.1  | -0.2 | 0.034259 |
| TC0400002690.mm.1 | NR_037603          | Kat5    | K(lysine) acetyltransferase 5                   | 5603014   | 5610094   | TC1900000975.mm.1  | -0.3 | 0.03427  |
| TC0400002694.mm.1 | NM_009856          | Cd83    | CD83 antigen                                    | 43785107  | 43803132  | TC1300000498.mm.1  | -0.5 | 0.034278 |
| TC0400002701.mm.1 | NM_028784          | F13a1   | coagulation factor XIII, A1 subunit             | 36867178  | 37050244  | TC1300001814.mm.1  | 0.7  | 0.034343 |
| TC0400002711.mm.1 | ENSMUST00000178810 | Gm25314 | predicted gene, 25314                           | 59371975  | 59372053  | TC07000003146.mm.1 | -0.1 | 0.034348 |
| TC0400002722.mm.1 | ENSMUST00000104249 | n-R5s17 | nuclear encoded rRNA 5S 178                     | 134416239 | 134416352 | TC0500001554.mm.1  | 0.2  | 0.034371 |
| TC0400002727.mm.1 | NM_001163743       | NlrX1   | NLR family member X1                            | 44252713  | 44268599  | TC09000002152.mm.1 | 0.1  | 0.034412 |
| TC0400002728.mm.1 | ENSMUST00000122583 | n-R5s21 | nuclear encoded rRNA 5S 218                     | 149734750 | 149734858 | TC0100003232.mm.1  | 0.3  | 0.034491 |
| TC0400002731.mm.1 | ENSMUST00000184893 | CTO2558 | N/A                                             | 38899833  | 38899944  | TC1400001759.mm.1  | 0.2  | 0.034506 |
| TC0400002737.mm.1 | ENSMUST00000177872 | Gm24388 | predicted gene, 24388                           | 40421515  | 40421621  | TC1400000406.mm.1  | -0.3 | 0.034715 |
| TC0400002744.mm.1 | NM_023503          | Ing2    | inhibitor of growth family, member 2            | 47667178  | 47675556  | TC0800002178.mm.1  | -0.1 | 0.03475  |
| TC0400002749.mm.1 | NM_001159910       | Cdc85c  | coiled-coil domain containing 85C               | 108206345 | 108275417 | TC1200002346.mm.1  | -0.1 | 0.034785 |
| TC0400002756.mm.1 | NCBI_Gene:667441:p | Trav3-1 | T cell receptor alpha variable 3-1              | 52580665  | 52581217  | TC1400000616.mm.1  | -0.2 | 0.034793 |
| TC0400002765.mm.1 | NM_147155          | Tagap1  | T cell activation GTPase activating protein 1   | 6954965   | 6961156   | TC1700001395.mm.1  | -0.4 | 0.034806 |
| TC0400002766.mm.1 | ENSMUST00000161062 | Gm6428  | predicted pseudogene 6428                       | 36601802  | 36602146  | TC0100000251.mm.1  | -0.5 | 0.034858 |
| TC0400002768.mm.1 | NM_001113368       | Ceacam2 | carcinoembryonic antigen-related cell adhesion  | 25516042  | 25540004  | TC0700002636.mm.1  | 0.3  | 0.03487  |
| TC0400002769.mm.1 | NM_145975          | Ddx46   | DEAD (Asp-Glu-Ala-Asp) box polypeptide 46       | 55634999  | 55681267  | TC1300000671.mm.1  | -0.4 | 0.03494  |
| TC0400002770.mm.1 | ENSMUST00000119442 | Gm13369 | predicted gene 13369                            | 24993357  | 24994343  | TC0200003124.mm.1  | -0.3 | 0.034992 |
| TC0400002771.mm.1 | ENSMUST00000102083 | Gm22752 | predicted gene, 22752                           | 93433197  | 93433766  | TC0300002421.mm.1  | 0.1  | 0.035015 |
| TC0400002775.mm.1 | NCBI_Gene:10012436 | Traj29  | T cell receptor alpha joining 29                | 54190946  | 54191005  | TC1400000734.mm.1  | -0.3 | 0.035039 |
| TC0400002776.mm.1 | ENSMUST00000119516 | Gm15824 | predicted gene 15824                            | 64190032  | 64190989  | TC0500002465.mm.1  | -0.1 | 0.035066 |
| TC0400002778.mm.1 | XM_001003926       | Rps6-ps | ribosomal protein S6, pseudogene 4              | 75190997  | 75191854  | TC0200003782.mm.1  | -0.7 | 0.035148 |
| TC0400002779.mm.1 | NM_175423          | Orai1   | ORAI calcium release-activated calcium modulat  | 123015074 | 123030452 | TC0500001405.mm.1  | -0.1 | 0.035227 |
| TC0400002786.mm.1 | NM_178695          | Prrg4   | proline rich Gla (G-carboxyglutamic acid) 4 (tr | 104830741 | 104849876 | TC0200004251.mm.1  | -0.2 | 0.035267 |
| TC0400002788.mm.1 | NM_023740          | Zdhhc16 | zinc finger, DHHC domain containing 16          | 41933472  | 41944103  | TC1900000602.mm.1  | -0.3 | 0.035273 |
| TC0400002791.mm.1 | NM_015776          | Mfap5   | microfibrillar associated protein 5             | 122505845 | 122529290 | TC0600001384.mm.1  | 0.4  | 0.035334 |
| TC0400002796.mm.1 | NM_017461          | 1-Sep   | septin 1                                        | 127214442 | 127218498 | TC0700004318.mm.1  | -0.8 | 0.035364 |
| TC0400002797.mm.1 | NM_028932          | Eaf1    | ELL associated factor 1                         | 31495079  | 31509858  | TC1400000329.mm.1  | -0.2 | 0.035376 |
| TC0400002807.mm.1 | NM_133911          | Gpr125  | G protein-coupled receptor 125                  | 49959951  | 50058996  | TC0500002386.mm.1  | 0.3  | 0.03538  |
| TC0400002810.mm.1 | NM_030226          | 9130019 | RIKEN cDNA 9130019O22 gene                      | 127382260 | 127387166 | TC0700004662.mm.1  | -0.2 | 0.03548  |
| TC0400002812.mm.1 | NM_001159578       | Lnx1    | ligand of numb-protein X 1                      | 74592446  | 74702911  | TC0500002608.mm.1  | 0.1  | 0.035504 |
| TC0400002832.mm.1 | ENSMUST00000118646 | Gm1826  | predicted gene 1826                             | 87393483  | 87394644  | TC0200001290.mm.1  | -0.2 | 0.035543 |
| TC0400002833.mm.1 | XM_003688940       | LOC1008 | zinc finger protein 292-like                    | 64786675  | 64851652  | TC1600001839.mm.1  | -0.3 | 0.035558 |
| TC0400002845.mm.1 | ENSMUST00000117842 | Gm11652 | predicted gene 11652                            | 105773518 | 105774784 | TC1100001762.mm.1  | -0.5 | 0.035591 |
| TC0400002846.mm.1 | ENSMUST00000158560 | Gm22940 | predicted gene, 22940                           | 11279265  | 11279419  | TC0400002207.mm.1  | 0.2  | 0.035674 |
| TC0400002849.mm.1 | NM_001097979       | Hist1h2 | histone cluster 1, H2bq                         | 21806412  | 21810199  | TC1300001563.mm.1  | -0.2 | 0.035833 |
| TC0400002852.mm.1 | NM_001166477       | Hmga1-r | high mobility group AT-hook I, related sequence | 120762794 | 120764419 | TC1100002046.mm.1  | -0.5 | 0.035843 |
| TC0400002855.mm.1 | NM_001038627       | Smurf1  | SMAD specific E3 ubiquitin protein ligase 1     | 144876495 | 144965847 | TC0500003585.mm.1  | 0.2  | 0.0359   |
| TC0400002856.mm.1 | XR_035179          | A530021 | Riken cDNA A530021J07 gene                      | 83148470  | 83179438  | TC0700001196.mm.1  | 0.2  | 0.036045 |
| TC0400002859.mm.1 | NM_010696          | Lcp2    | lymphocyte cytosolic protein 2                  | 34046920  | 34092295  | TC0600003602.mm.1  | -0.9 | 0.036055 |
| TC0400002860.mm.1 | NM_001039186       | Ceacam1 | carcinoembryonic antigen-related cell adhesion  | 25461702  | 25489492  | TC0700002635.mm.1  | 0.5  | 0.036057 |
| TC0400002873.mm.1 | NM_001172104       | Zbtb25  | zinc finger and BTB domain containing 25        | 76347782  | 76369602  | TC1200001947.mm.1  | -0.1 | 0.036081 |
| TC0400002874.mm.1 | NM_021384          | Rsad2   | radical S-adenosyl methionine domain containin  | 26442743  | 26456452  | TC1200001552.mm.1  | 0.3  | 0.036088 |
| TC0400002895.mm.1 | NM_175378          | Clip4   | CAP-GLY domain containing linker protein family | 17169691  | 171864210 | TC1700001143.mm.1  | -0.3 | 0.036163 |
| TC0400002919.mm.1 | NM_133990          | Il13ra1 | interleukin 13 receptor, alpha 1                | 36112110  | 36171262  | TC0X00000316.mm.1  | -0.2 | 0.036197 |
| TC0400002920.mm.1 | ENSMUST00000119417 | Gm5844  | predicted gene 5844                             | 18008806  | 18010996  | TC0300000117.mm.1  | -0.5 | 0.036213 |
| TC0400002921.mm.1 | NM_010903          | Nfe2l3  | nuclear factor, erythroid derived 2, like 3     | 51432670  | 51458772  | TC0600000606.mm.1  | -0.1 | 0.036314 |
| TC0400002928.mm.1 | ENSMUST00000102085 | Gm22137 | predicted gene, 22137                           | 8623163   | 8623720   | TC1600001173.mm.1  | 0.3  | 0.036344 |
| TC0400002936.mm.1 | BC106857           | Mcoln3  | mucolipin 3                                     | 146117459 | 146141806 | TC0300001488.mm.1  | -0.3 | 0.036365 |
| TC0400002946.mm.1 | ENSMUST00000062429 | Gm16433 | predicted gene 16433                            | 108563445 | 108565693 | TC0600002885.mm.1  | -0.3 | 0.036369 |
| TC0400002953.mm.1 | ENSMUST00000175582 | Gm24970 | predicted gene, 24970                           | 31564962  | 31565043  | TC1700001821.mm.1  | -0.2 | 0.036391 |
| TC0400002969.mm.1 | NM_178683          | Depdc1b | DEP domain containing 1B                        | 108316332 | 108407782 | TC1300001205.mm.1  | -0.2 | 0.036441 |
| TC0400002973.mm.1 | ENSMUST00000075609 | Gm10043 | predicted pseudogene 10043                      | 10145453  | 10145965  | TC1800000971.mm.1  | -0.2 | 0.036504 |
| TC0400002978.mm.1 | ENSMUST00000117125 | Gm13303 | predicted gene 13303                            | 42025429  | 42026712  | TC0400002486.mm.1  | 0.3  | 0.036574 |
| TC0400002979.mm.1 | NR_037992          | Jmjd4   | jumonji domain containing 4                     | 59450045  | 59458567  | TC1100000722.mm.1  | -0.2 | 0.036594 |
| TC0400002980.mm.1 | NM_146900          | Olfr122 | olfactory receptor 1220                         | 89096938  | 89097963  | TC0200004040.mm.1  | 0.3  | 0.036686 |
| TC0400002986.mm.1 | ENSMUST00000120799 | Gm11786 | predicted gene 11786                            | 3327175   | 3327329   | TC0400000007.mm.1  | -0.3 | 0.036745 |
| TC0400003001.mm.1 | NM_007672          | Cdr2    | cerebellar degeneration-related 2               | 120957036 | 120982312 | TC0700004201.mm.1  | 0.4  | 0.036818 |
| TC0400003005.mm.1 | NM_027088          | Bra1    | Bra1 associated protein 1                       | 31251489  | 31259930  | TC1400000326.mm.1  | -0.2 | 0.036855 |
| TC0400003009.mm.1 | NM_181848          | Optn    | optineurin                                      | 5020642   | 5064051   | TC0200002872.mm.1  | 0.3  | 0.036893 |
| TC0400003011.mm.1 | NM_010651          | Klra9   | killer cell lectin-like receptor subfamily A, m | 130178682 | 130193112 | TC0600003611.mm.1  | -0.3 | 0.036907 |
| TC0400003012.mm.1 | ENSMUST00000116350 | Tpm3-rs | tropomyosin 3, related sequence 2               | 27996583  | 27996905  | TC0400002339.mm.1  | -0.8 | 0.036935 |
| TC0400003016.mm.1 | ENSMUST00000104059 | Gm24263 | predicted gene, 24263                           | 23296329  | 23296435  | TC1900000377.mm.1  | 0.3  | 0.036941 |
| TC0400003018.mm.1 | NM_016856          | Cpsf2   | cleavage and polyadenylation specific factor 2  | 101975974 | 102005993 | TC0X00001009.mm.1  | -0.3 | 0.036966 |
| TC0400003020.mm.1 | NM_029250          | Etnk1   | ethanolamine kinase 1                           | 143167230 | 143208547 | TC0600001696.mm.1  | -0.5 | 0.037028 |
| TC0400003027.mm.1 | NM_172713          | Sdad1   | SDA1 domain containing 1                        | 92284010  | 92310024  | TC0500002754.mm.1  | -0.2 | 0.037036 |
| TC0400003031.mm.1 | NCBI_Gene:780804:p | Ighv11- | immunoglobulin heavy variable 11-1              | 113981879 | 113982341 | TC1200002579.mm.1  | 1.3  | 0.037086 |
| TC0400003041.mm.1 | ENSMUST00000085340 | Gm10268 | predicted gene 10268                            | 38244828  | 38245382  | TC1800000393.mm.1  | -0.9 | 0.037091 |
| TC0400003047.mm.1 | ENSMUST00000118131 | Gm8503  | predicted gene 8503                             | 75155819  | 75156273  | TC0X00000739.mm.1  | -0.4 | 0.037092 |
| TC0400003048.mm.1 | OTTMUST00000054917 | AC11062 | ---                                             | 104821204 | 104822256 | TC0700001534.mm.1  | 0.3  | 0.037104 |
| TC0400003051.mm.1 | NM_026654          | Toe1    | target of EGR1, member 1 (nuclear)              | 116794310 | 116807640 | TC0400003351.mm.1  | -0.1 | 0.037138 |
| TC0400003055.mm.1 | ENSMUST00000158636 | Mir669n | microRNA 669n                                   | 115979902 | 115979955 | TC0300001184.mm.1  | 0.4  | 0.037275 |
| TC0400003059.mm.1 | ENSMUST00000166026 | Gm14387 | predicted gene 14387                            | 175086501 | 175089918 | TC0200002715.mm.1  | 0.6  | 0.037368 |
| TC0400003060.mm.1 | NM_025974          | Rpl14   | ribosomal protein L14                           | 120571517 | 120574653 | TC0900001605.mm.1  | -0.7 | 0.037372 |
| TC0400003062.mm.1 | NM_028015          | Cers5   | ceramide synthase 5                             | 99733506  | 99772885  | TC1500002221.mm.1  | 0.2  | 0.03738  |
| TC0400003071.mm.1 | NCBI_Gene:108022:p | Igkv6-1 | immunoglobulin kappa variable 6-15              | 70406469  | 70406992  | TC0600003595.mm.1  | -1.4 | 0.037399 |
| TC0400003074.mm.1 | ENSMUST00000079663 | Gm2174  | predicted gene 2174                             | 56447965  | 56448366  | TC0X00000518.mm.1  | -0.9 | 0.037411 |

|                   |                    |         |                                                 |           |           |                    |      |          |
|-------------------|--------------------|---------|-------------------------------------------------|-----------|-----------|--------------------|------|----------|
| TC0400003079.mm.1 | XM_001480943       | Gm9840  | predicted gene 9840                             | 35935462  | 35937997  | TC1700001988.mm.1  | -0.2 | 0.037449 |
| TC0400003085.mm.1 | NM_007693          | Chga    | chromogranin A                                  | 102554969 | 102565027 | TC1200001018.mm.1  | -0.2 | 0.03745  |
| TC0400003090.mm.1 | NM_011943          | Map2k6  | mitogen-activated protein kinase kinase 6       | 110399122 | 110525522 | TC1100001841.mm.1  | -0.2 | 0.03748  |
| TC0400003092.mm.1 | ENSMUST00000099936 | Gm10813 | predicted gene 10813                            | 36235604  | 36235697  | TC1600001568.mm.1  | 0.2  | 0.037646 |
| TC0400003094.mm.1 | ENSMUST00000097987 | Gm10582 | predicted gene 10582                            | 88761101  | 88761500  | TC0400003020.mm.1  | -0.1 | 0.037712 |
| TC0400003096.mm.1 | ENSMUST00000118873 | Gm6382  | predicted gene 6382                             | 142210884 | 142211825 | TC0X00001400.mm.1  | -0.5 | 0.037745 |
| TC0400003097.mm.1 | NM_008940          | Klk8    | kallikrein related-peptidase 8                  | 43797577  | 43803822  | TC0700000775.mm.1  | -0.1 | 0.037747 |
| TC0400003100.mm.1 | NR_035410          | Mir669k | microRNA 669k                                   | 10475300  | 10475426  | TC0200000107.mm.1  | -0.3 | 0.037792 |
| TC0400003101.mm.1 | NM_023343          | Ilkap   | integrin-linked kinase-associated serine/threon | 91373861  | 91398783  | TC0100002798.mm.1  | -0.1 | 0.037803 |
| TC0400003104.mm.1 | ENSMUST00000121149 | Gm12096 | predicted gene 12096                            | 30528295  | 30529401  | TC1100000312.mm.1  | -0.4 | 0.037812 |
| TC0400003117.mm.1 | NM_053069          | Atg5    | autophagy related 5                             | 44268358  | 44364291  | TC1000000413.mm.1  | -0.2 | 0.037841 |
| TC0400003118.mm.1 | ENSMUST00000117075 | Gm4913  | predicted gene 4913                             | 119966284 | 119967573 | TC0X00001174.mm.1  | -0.2 | 0.037859 |
| TC0400003119.mm.1 | ENSMUST00000158068 | Gm22330 | predicted gene, 22330                           | 31352980  | 31353094  | TC1300000345.mm.1  | 0.4  | 0.037925 |
| TC0400003126.mm.1 | NM_001081430       | Naa30   | N(alpha)-acetyltransferase 30, NatC catalytic s | 49172226  | 49191031  | TC1400000542.mm.1  | -0.2 | 0.037928 |
| TC0400003146.mm.1 | NM_007977          | F8      | coagulation factor VIII                         | 75172715  | 75382615  | TC0X00002472.mm.1  | 0.2  | 0.03809  |
| TC0400003149.mm.1 | ENSMUST00000083060 | Gm22422 | predicted gene, 22422                           | 56035753  | 56035887  | TC1600001748.mm.1  | -1.0 | 0.03812  |
| TC0400003153.mm.1 | NM_009331          | Tcf7    | transcription factor 7, T cell specific         | 52252295  | 52283014  | TC1100002715.mm.1  | -1.7 | 0.038123 |
| TC0400003163.mm.1 | ENSMUST00000119178 | Gm13065 | predicted gene 13065                            | 149793279 | 149793419 | TC0400004052.mm.1  | -0.3 | 0.038201 |
| TC0400003164.mm.1 | NCBI_Gene:10004327 | Trav9n- | T cell receptor alpha variable 9N-3             | 53231466  | 53233367  | TC1400002812.mm.1  | -0.5 | 0.038262 |
| TC0400003170.mm.1 | ENSMUST00000084199 | Gm6378  | predicted pseudogene 6378                       | 21076667  | 21077110  | TC1800001053.mm.1  | -0.2 | 0.038269 |
| TC0400003179.mm.1 | NM_029357          | Pcdh1   | protocadherin 1                                 | 38185915  | 38212053  | TC1800001227.mm.1  | 0.2  | 0.038277 |
| TC0400003184.mm.1 | NM_009911          | Cxcr4   | chemokine (C-X-C motif) receptor 4              | 128588199 | 128592299 | TC0100003029.mm.1  | -1.5 | 0.038278 |
| TC0400003196.mm.1 | NR_027863          | Rnu3b2  | U3B small nuclear RNA 2                         | 0         | 0         | TSUnmapped0000017  | -0.8 | 0.038313 |
| TC0400003220.mm.1 | NR_004416          | Rnu3b3  | U3B small nuclear RNA 3                         | 0         | 0         | TSUnmapped0000018  | -0.8 | 0.038313 |
| TC0400003225.mm.1 | NR_004415          | Rnu3b1  | U3B small nuclear RNA 1                         | 0         | 0         | TSUnmapped0000018  | -0.8 | 0.038313 |
| TC0400003226.mm.1 | NM_021552          | Nsa2    | NSA2 ribosome biogenesis homolog (S. cerevisia  | 97129427  | 97137926  | TC1300002479.mm.1  | -0.4 | 0.038343 |
| TC0400003230.mm.1 | NCBI_Gene:667924:p | Igkv3-1 | immunoglobulin kappa variable 3-10              | 70572633  | 70573230  | TC0600003527.mm.1  | -1.4 | 0.038354 |
| TC0400003244.mm.1 | NM_144921          | Atp1a3  | ATPase, Na+/K+ transporting, alpha 3 polypeptid | 24978167  | 25005957  | TC0700002617.mm.1  | 0.3  | 0.038424 |
| TC0400003246.mm.1 | ENSMUST00000104369 | Gm23706 | predicted gene, 23706                           | 8480660   | 8480741   | TC1600001172.mm.1  | -0.6 | 0.038458 |
| TC0400003256.mm.1 | ENSMUST00000112589 | Gm11099 | predicted gene 11099                            | 58859434  | 58907618  | TC0200000886.mm.1  | 0.4  | 0.038458 |
| TC0400003265.mm.1 | ENSMUST00000179471 | Gm22951 | predicted gene, 22951                           | 99368029  | 99368135  | TC1500002210.mm.1  | -0.5 | 0.038465 |
| TC0400003289.mm.1 | NR_028144          | Lrrc28  | leucine rich repeat containing 28               | 67513410  | 67645236  | TC0700003448.mm.1  | -0.2 | 0.038489 |
| TC0400003290.mm.1 | ENSMUST00000158843 | Gm24354 | predicted gene, 24354                           | 116478218 | 116478281 | TC1200002499.mm.1  | -0.1 | 0.038489 |
| TC0400003291.mm.1 | ENSMUST00000175292 | Gm23630 | predicted gene, 23630                           | 94184027  | 94184130  | TC02000004173.mm.1 | 0.3  | 0.038496 |
| TC0400003294.mm.1 | BC055316           | Pim1    | proviral integration site 1                     | 29490812  | 29495465  | TC1700000505.mm.1  | -0.4 | 0.038517 |
| TC0400003306.mm.1 | ENSMUST00000036712 | Tom1    | target of myb1 homolog (chicken)                | 128644838 | 128647096 | TC06000001514.mm.1 | 0.4  | 0.038542 |
| TC0400003307.mm.1 | NR_003363          | Gm6548  | eukaryotic translation elongation factor 1 alph | 78850505  | 78852544  | TC1700002557.mm.1  | -0.3 | 0.038552 |
| TC0400003315.mm.1 | ENSMUST00000119295 | Gm14098 | predicted gene 14098                            | 132678269 | 132679239 | TC0200002039.mm.1  | -0.2 | 0.038579 |
| TC0400003319.mm.1 | NM_023485          | Sync    | syncoilin                                       | 129287617 | 129308559 | TC0400001517.mm.1  | 0.1  | 0.038591 |
| TC0400003321.mm.1 | NM_178908          | Fam26e  | family with sequence similarity 26, member E    | 34091352  | 34096519  | TC1000001993.mm.1  | 0.2  | 0.038666 |
| TC0400003335.mm.1 | XM_001473957       | Gm10349 | predicted gene 10349                            | 10483083  | 10483545  | TC1800000975.mm.1  | -0.4 | 0.038691 |
| TC0400003349.mm.1 | ENSMUST00000117214 | Gm13870 | predicted gene 13870                            | 104537437 | 104538459 | TC0200001559.mm.1  | -0.2 | 0.038694 |
| TC0400003351.mm.1 | NM_153387          | Tubgcp4 | tubulin, gamma complex associated protein 4     | 121170654 | 121198770 | TC0200001808.mm.1  | -0.2 | 0.038711 |
| TC0400003353.mm.1 | NM_019814          | Higd1a  | HIG1 domain family, member 1A                   | 121848560 | 121858000 | TC0900003275.mm.1  | 0.2  | 0.038719 |
| TC0400003355.mm.1 | NCBI_Gene:780818:p | Ighv11- | immunoglobulin heavy variable V11-2             | 114048241 | 114054514 | TC1200002581.mm.1  | 1.2  | 0.038748 |
| TC0400003361.mm.1 | NCBI_Gene:547420:p | Trav7-3 | T cell receptor alpha variable 7-3              | 53443249  | 53443839  | TC1400000693.mm.1  | -0.4 | 0.038767 |
| TC0400003363.mm.1 | ENSMUST00000158365 | Gm22767 | predicted gene, 22767                           | 132838383 | 132838547 | TC0400003684.mm.1  | -1.2 | 0.038898 |
| TC0400003364.mm.1 | ENSMUST00000116793 | Gm25847 | predicted gene, 25847                           | 87034766  | 87034861  | TC1200000867.mm.1  | 0.3  | 0.038901 |
| TC0400003365.mm.1 | ENSMUST00000117051 | Gm14445 | predicted gene 14445                            | 175038121 | 175041036 | TC0200002713.mm.1  | 0.1  | 0.038911 |
| TC0400003369.mm.1 | NR_003568          | Gpr137b | G protein-coupled receptor 137B, pseudogene     | 12614065  | 12650395  | TC1300001451.mm.1  | 0.4  | 0.038964 |
| TC0400003374.mm.1 | NM_001252437       | Mgnr1   | mahogunin, ring finger 1                        | 4886100   | 4938296   | TC1400000038.mm.1  | 0.3  | 0.038998 |
| TC0400003380.mm.1 | ENSMUST00000175080 | Gm23163 | predicted gene, 23163                           | 109425644 | 109425744 | TC0800002900.mm.1  | 0.3  | 0.039065 |
| TC0400003383.mm.1 | NM_175113          | Trmt6   | tRNA methyltransferase 6                        | 132804207 | 132816055 | TC0200004681.mm.1  | -0.1 | 0.039119 |
| TC0400003386.mm.1 | NM_007649          | Cd48    | CD48 antigen                                    | 171682009 | 171705258 | TC0100001597.mm.1  | -0.5 | 0.039143 |
| TC0400003393.mm.1 | ENSMUST00000158022 | Gm26487 | predicted gene, 26487                           | 59190773  | 59190866  | TC0X00000544.mm.1  | 0.2  | 0.039199 |
| TC0400003394.mm.1 | NM_001290273       | 1-Mar   | mitochondrial amidoxime reducing component 1    | 0         | 0         | TSUnmapped0000000  | 0.5  | 0.039275 |
| TC0400003408.mm.1 | NM_016851          | Irf6    | interferon regulatory factor 6                  | 193153112 | 193172042 | TC0100003872.mm.1  | -0.1 | 0.039327 |
| TC0400003417.mm.1 | NM_138956          | Rassf3  | Ras association (RalGDS/AF-6) domain family me  | 121410350 | 121476305 | TC1000003047.mm.1  | 0.2  | 0.039338 |
| TC0400003418.mm.1 | XM_003085121       | Gm17748 | predicted gene, 17748                           | 9421940   | 9429394   | TC1700001422.mm.1  | -0.3 | 0.039358 |
| TC0400003422.mm.1 | NM_198937          | Hn1l    | hematological and neurological expressed 1-like | 24937419  | 24960652  | TC1700001648.mm.1  | 0.3  | 0.03936  |
| TC0400003433.mm.1 | NM_201361          | Rmdn2   | regulator of microtubule dynamics 2             | 79614900  | 79682152  | TC1700001197.mm.1  | 0.2  | 0.039439 |
| TC0400003441.mm.1 | ENSMUST00000073637 | Gm7331  | predicted gene 7331                             | 162566816 | 162567309 | TC0X00001645.mm.1  | -0.4 | 0.039442 |
| TC0400003445.mm.1 | ENSMUST00000175418 | Gm25037 | predicted gene, 25037                           | 4854314   | 4854423   | TC0500001901.mm.1  | 0.3  | 0.039521 |
| TC0400003446.mm.1 | NM_177864          | Skint9  | selection and upkeep of intraepithelial T cells | 112385969 | 112433985 | TC0400003290.mm.1  | -0.2 | 0.039531 |
| TC0400003448.mm.1 | NCBI_Gene:384419:p | Igkv8-3 | immunoglobulin kappa chain variable 8-30        | 70117061  | 70117617  | TC0600003586.mm.1  | -1.4 | 0.039683 |
| TC0400003452.mm.1 | NM_026472          | Mki67ip | Mki67 (FHA domain) interacting nucleolar phosph | 118321839 | 118333831 | TC0100001058.mm.1  | -0.4 | 0.039711 |
| TC0400003456.mm.1 | ENSMUST00000121348 | Gm7638  | predicted gene 7638                             | 11185133  | 11186099  | TC1600001211.mm.1  | -0.1 | 0.039729 |
| TC0400003465.mm.1 | NM_145467          | Iltgb1  | integrin, beta-like 1                           | 123659971 | 123975618 | TC1400001346.mm.1  | 0.1  | 0.039763 |
| TC0400003466.mm.1 | ENSMUST00000158370 | Gm22764 | predicted gene, 22764                           | 111965957 | 111966048 | TC1400002694.mm.1  | 0.3  | 0.039819 |
| TC0400003478.mm.1 | NM_026892          | Eif1b   | eukaryotic translation initiation factor 1B     | 120492606 | 120495330 | TC0900001603.mm.1  | -0.2 | 0.039849 |
| TC0400003488.mm.1 | NM_009422          | Traf2   | TNF receptor-associated factor 2                | 25517982  | 25546940  | TC0200003157.mm.1  | -0.2 | 0.039856 |
| TC0400003490.mm.1 | NM_009401          | Tnfrsf8 | tumor necrosis factor receptor superfamily, mem | 145267137 | 145315164 | TC0400003958.mm.1  | -0.2 | 0.039956 |
| TC0400003506.mm.1 | ENSMUST00000096481 | Gm14539 | predicted gene 14539                            | 20581138  | 20581314  | TC0X00001925.mm.1  | -0.6 | 0.039961 |
| TC0400003514.mm.1 | NM_009808          | Casp12  | caspase 12                                      | 5345430   | 5373034   | TC0900000033.mm.1  | 0.3  | 0.039967 |
| TC0400003516.mm.1 | ENSMUST00000121259 | Gm14845 | predicted gene 14845                            | 101691545 | 101691850 | TC0X00002725.mm.1  | 0.4  | 0.040046 |
| TC0400003522.mm.1 | NCBI_Gene:667604:p | Trav8d- | Trav8d-2 T cell receptor alpha variable 8D-2    | 53042428  | 53042891  | TC1400000654.mm.1  | -0.4 | 0.040059 |
| TC0400003526.mm.1 | NM_007725          | Cnn2    | calponin 2                                      | 79988584  | 79996062  | TC1000000834.mm.1  | -0.4 | 0.040077 |
| TC0400003529.mm.1 | NM_027249          | Tlcd2   | TLC domain containing 2                         | 75468079  | 75470899  | TC1100004270.mm.1  | 0.4  | 0.040124 |

|                   |                     |         |                                                            |           |           |                    |      |          |
|-------------------|---------------------|---------|------------------------------------------------------------|-----------|-----------|--------------------|------|----------|
| TC0400003532.mm.1 | NM_026991           | Sat2    | spermidine/spermine N1-acetyl transferase 2                | 69622024  | 69623870  | TC1100000917.mm.1  | 0.2  | 0.040128 |
| TC0400003542.mm.1 | NM_019680           | Elf4    | E74-like factor 4 (ets domain transcription fac            | 48411046  | 48463132  | TC0X00002161.mm.1  | -0.4 | 0.040149 |
| TC0400003543.mm.1 | NM_001033236        | Mettl21 | methyltransferase like 21D                                 | 69577628  | 69583110  | TC1200001868.mm.1  | -0.1 | 0.04015  |
| TC0400003544.mm.1 | NM_019912           | Ube2d2a | ubiquitin-conjugating enzyme E2D 2A                        | 35771559  | 35807172  | TC1800000318.mm.1  | -0.3 | 0.040205 |
| TC0400003549.mm.1 | ENSMUST00000170136  | Gm15710 | predicted gene 15710                                       | 92140256  | 92140960  | TC0500002749.mm.1  | -0.5 | 0.040253 |
| TC0400003567.mm.1 | NM_019454           | Dll4    | delta-like 4 (Drosophila)                                  | 119325784 | 119335962 | TC0200001769.mm.1  | 0.3  | 0.040265 |
| TC0400003577.mm.1 | ENSMUST00000118467  | Rap1a-p | RAS related protein-1a, pseudogene 2                       | 117240883 | 117241441 | TC0200001722.mm.1  | -0.3 | 0.04037  |
| TC0400003579.mm.1 | NM_027446           | Fam86   | family with sequence similarity 86                         | 5244152   | 5255983   | TC1600001158.mm.1  | 0.1  | 0.040377 |
| TC0400003589.mm.1 | ENSMUST00000097152  | Gm10356 | predicted gene 10356                                       | 47050382  | 47051641  | TC0300001924.mm.1  | -0.4 | 0.040446 |
| TC0400003593.mm.1 | NCBI_Gene:668389:p  | Ighv2-4 | immunoglobulin heavy variable V2-4                         | 113653291 | 113653724 | TC1200002559.mm.1  | -0.9 | 0.040452 |
| TC0400003611.mm.1 | NCBI_Gene:108004:p  | Igkv3-1 | immunoglobulin kappa variable 3-1                          | 70703578  | 70704177  | TC0600003531.mm.1  | -1.2 | 0.040475 |
| TC0400003616.mm.1 | NM_011738           | Ywhah   | tyrosine 3-monooxygenase/tryptophan 5-monoc                | 33018816  | 33027966  | TC0500000349.mm.1  | -0.2 | 0.040538 |
| TC0400003629.mm.1 | NM_145463           | Shisa2  | shisa homolog 2 (Xenopus laevis)                           | 59625281  | 59631660  | TC1400000837.mm.1  | -0.3 | 0.040554 |
| TC0400003655.mm.1 | NM_007802           | Ctsk    | cathepsin K                                                | 95499210  | 95509387  | TC0300000902.mm.1  | 0.4  | 0.040575 |
| TC0400003659.mm.1 | NM_001276315        | Cdkl2   | cyclin-dependent kinase-like 2 (CDC2-related ki            | 92006074  | 92043042  | TC0500002744.mm.1  | 0.2  | 0.040621 |
| TC0400003661.mm.1 | ENSMUST00000121238  | Gm11805 | predicted gene 11805                                       | 3720427   | 3721026   | TC0400002124.mm.1  | -0.3 | 0.040626 |
| TC0400003664.mm.1 | ENSMUST00000182930  | Gm9169  | predicted gene 9169                                        | 95144371  | 95144906  | TC0300000891.mm.1  | -0.1 | 0.040636 |
| TC0400003672.mm.1 | NM_009778           | C3      | complement component 3                                     | 57203970  | 57228136  | TC1700002352.mm.1  | 0.9  | 0.040719 |
| TC0400003676.mm.1 | OTTMUST00000017720  | RP23-27 | ---                                                        | 60818796  | 60819278  | TC1100002898.mm.1  | -0.5 | 0.040719 |
| TC0400003681.mm.1 | ENSMUST00000118935  | Gm15235 | predicted gene 15235                                       | 94589466  | 94589659  | TC0300000872.mm.1  | -0.6 | 0.040872 |
| TC0400003684.mm.1 | NM_033217           | Ngfr    | nerve growth factor receptor (TNFR superfamily,            | 95568818  | 95587735  | TC1100003593.mm.1  | -0.1 | 0.040874 |
| TC0400003685.mm.1 | NCBI_Gene:667899:p  | Igkv6-1 | immunoglobulin kappa variable 6-13                         | 70457501  | 70458036  | TC0600003597.mm.1  | -1.0 | 0.040914 |
| TC0400003687.mm.1 | NM_025884           | Zfp830  | zinc finger protein 830                                    | 82764345  | 82767622  | TC1100001231.mm.1  | -0.2 | 0.040983 |
| TC0400003688.mm.1 | NM_029077           | Trim14  | tripartite motif-containing 14                             | 46493781  | 46536144  | TC0400002601.mm.1  | 0.2  | 0.041006 |
| TC0400003695.mm.1 | ENSMUST00000182081  | Gm9162  | predicted gene 9162                                        | 33137119  | 33138109  | TC0700000608.mm.1  | 0.1  | 0.041037 |
| TC0400003706.mm.1 | NM_010900           | Nfatc2i | nuclear factor of activated T cells, cytoplasmic           | 126382854 | 126396737 | TC0700004276.mm.1  | -0.3 | 0.041106 |
| TC0400003707.mm.1 | NM_001166753        | Vmn1r15 | vomeranosal 1 receptor 155                                 | 20668918  | 20669841  | TC0700000322.mm.1  | 0.2  | 0.041121 |
| TC0400003709.mm.1 | NM_001166753        | Vmn1r15 | vomeranosal 1 receptor 155                                 | 22658018  | 22658941  | TC0700000343.mm.1  | 0.2  | 0.041121 |
| TC0400003716.mm.1 | ENSMUST00000165691  | Gm5529  | predicted pseudogene 5529                                  | 79922536  | 79923426  | TC0100002647.mm.1  | -0.3 | 0.041173 |
| TC0400003736.mm.1 | NM_007983           | Faf1    | Fas-associated factor 1                                    | 109676588 | 109963960 | TC0400001171.mm.1  | -0.2 | 0.041195 |
| TC0400003741.mm.1 | ENSMUST000000083701 | Gm24253 | predicted gene, 24253                                      | 56263165  | 56263240  | TC1100002793.mm.1  | -1.3 | 0.0412   |
| TC0400003742.mm.1 | ENSMUST00000082406  | mt-Tk   | mitochondrially encoded tRNA lysine                        | 7700      | 7764      | TC0M000000008.mm.1 | 0.6  | 0.041208 |
| TC0400003749.mm.1 | ENSMUST00000056452  | Gm11223 | predicted gene 11223                                       | 69925201  | 69926171  | TC0400002845.mm.1  | -1.3 | 0.041256 |
| TC0400003758.mm.1 | NM_001204281        | Hdac7   | histone deacetylase 7                                      | 97792664  | 97844502  | TC1500002158.mm.1  | -0.5 | 0.041263 |
| TC0400003761.mm.1 | NM_001142963_2      | Gm4767  | predicted gene 4767                                        | 81812186  | 81826490  | TC1000000909.mm.1  | -0.3 | 0.041326 |
| TC0400003763.mm.1 | ENSMUST00000086887  | Gm10197 | predicted gene 10197                                       | 53371566  | 53371766  | TC1900001670.mm.1  | -0.2 | 0.041343 |
| TC0400003765.mm.1 | ENSMUST00000178971  | Gm6900  | predicted gene 6900                                        | 10656479  | 10656820  | TC0700002316.mm.1  | -0.4 | 0.041361 |
| TC0400003771.mm.1 | ENSMUST00000084003  | Gm25627 | predicted gene, 25627                                      | 146116102 | 146116254 | TC0300003093.mm.1  | 0.2  | 0.041391 |
| TC0400003773.mm.1 | NM_178799           | Acad12  | acyl-Coenzyme A dehydrogenase family, membe                | 121598281 | 121618938 | TC0500003194.mm.1  | 0.2  | 0.041421 |
| TC0400003777.mm.1 | NM_029738           | Cluap1  | clusterin associated protein 1                             | 3908801   | 3941147   | TC1600002167.mm.1  | -0.1 | 0.041459 |
| TC0400003788.mm.1 | NM_020028           | Lpar2   | lysophosphatidic acid receptor 2                           | 69822429  | 69831102  | TC0800000726.mm.1  | -0.1 | 0.041468 |
| TC0400003792.mm.1 | NM_001166218        | Zfp712  | zinc finger protein 712                                    | 67038594  | 67061170  | TC1300002239.mm.1  | -0.2 | 0.041473 |
| TC0400003794.mm.1 | NM_021394           | Zbp1    | Z-DNA binding protein 1                                    | 173206612 | 173218923 | TC0200005290.mm.1  | -0.3 | 0.041486 |
| TC0400003821.mm.1 | ENSMUST00000135410  | Eif5a3  | eukaryotic translation initiation factor 5A-lik            | 90132229  | 90132675  | TC0500000831.mm.1  | -1.0 | 0.041553 |
| TC0400003827.mm.1 | ENSMUST00000157922  | Gm24965 | predicted gene, 24965                                      | 25940365  | 25940470  | TC0400000219.mm.1  | 0.2  | 0.041683 |
| TC0400003833.mm.1 | ENSMUST00000121781  | Gm12094 | predicted gene 12094                                       | 29840375  | 29840846  | TC110000306.mm.1   | -0.4 | 0.041784 |
| TC0400003834.mm.1 | ENSMUST00000184700  | RP24-22 | N/A                                                        | 72128587  | 72129391  | TC0900000956.mm.1  | -0.1 | 0.041827 |
| TC0400003836.mm.1 | NM_001004191        | Gm5617  | predicted gene 5617                                        | 48495343  | 48495975  | TC0900000586.mm.1  | 0.3  | 0.04185  |
| TC0400003848.mm.1 | NM_001013380        | Dync1li | dynein, cytoplasmic 1 light intermediate chain             | 104417674 | 104443047 | TC0800002802.mm.1  | 0.3  | 0.04185  |
| TC0400003851.mm.1 | ENSMUST00000121654  | Gm12372 | predicted gene 12372                                       | 37139107  | 37139874  | TC0400002418.mm.1  | -0.5 | 0.041883 |
| TC0400003880.mm.1 | ENSMUST00000163360  | D17H655 | DNA segment, Chr 17, human D6S56E 5                        | 34996736  | 35000958  | TC1700001938.mm.1  | -0.7 | 0.041887 |
| TC0400003894.mm.1 | NM_007679           | Cebpδ   | CCAAT/enhancer binding protein (C/EBP), delta              | 15887286  | 15889545  | TC1600000192.mm.1  | 0.3  | 0.041895 |
| TC0400003907.mm.1 | NM_021720           | Donson  | downstream neighbor of SON                                 | 91677268  | 91688765  | TC1600002182.mm.1  | -0.2 | 0.041937 |
| TC0400003914.mm.1 | NM_201641           | Ugt1a10 | UDP glycosyltransferase 1 family, polypeptide A            | 88055388  | 88220002  | TC0100000836.mm.1  | 0.5  | 0.042007 |
| TC0400003917.mm.1 | NM_001103367        | Rai2    | retinoic acid induced 2                                    | 161717036 | 161779496 | TC0X00001639.mm.1  | 0.1  | 0.042007 |
| TC0400003925.mm.1 | NM_138953           | ElI2    | elongation factor RNA polymerase II 2                      | 75707484  | 75772361  | TC1300000912.mm.1  | 0.4  | 0.042038 |
| TC0400003958.mm.1 | NM_019965           | Dnajb12 | Dnaj (Hsp40) homolog, subfamily B, member 12               | 59879556  | 59899302  | TC1000000540.mm.1  | 0.2  | 0.042083 |
| TC0400003965.mm.1 | NM_001039483        | Tmco1   | transmembrane and coiled-coil domains 1                    | 167308670 | 167333978 | TC0100001548.mm.1  | 0.3  | 0.042109 |
| TC0400003967.mm.1 | uc007ljs.1          | OTTMUSG | predicted gene, OTTMUSG00000002180, mRNA                   | 99798186  | 99809892  | TC1100001602.mm.1  | -0.2 | 0.042123 |
| TC0400003968.mm.1 | NM_011293           | Polr2j  | polymerase (RNA) II (DNA directed) polypeptide             | 136116631 | 136122947 | TC0500001598.mm.1  | -0.2 | 0.042227 |
| TC0400003969.mm.1 | ENSMUST00000157452  | Gm22814 | predicted gene, 22814                                      | 33004663  | 33004766  | TC1800001137.mm.1  | -0.2 | 0.042254 |
| TC0400003973.mm.1 | NM_025684           | Nepn    | nephrocan                                                  | 52388972  | 52404607  | TC1000000468.mm.1  | 0.2  | 0.042265 |
| TC0400003976.mm.1 | ENSMUST00000051437  | Hspe1-p | heat shock protein 1 (chaperonin 10), pseudoger            | 81399812  | 81400123  | TC1200000755.mm.1  | -0.2 | 0.042274 |
| TC0400003977.mm.1 | ENSMUST00000118681  | Gm2810  | predicted pseudogene 2810                                  | 40328438  | 40329427  | TC0500000450.mm.1  | -0.3 | 0.042297 |
| TC0400003982.mm.1 | NCBI_Gene:10012467  | Trbv13- | T cell receptor beta, variable 13-2                        | 41121396  | 41121832  | TC0600003498.mm.1  | -1.6 | 0.042305 |
| TC0400003983.mm.1 | NM_025372           | Tipin   | timeless interacting protein                               | 64281607  | 64304794  | TC0900000819.mm.1  | -0.5 | 0.042312 |
| TC0400003984.mm.1 | NM_008428           | Kcnj8   | potassium inwardly-rectifying channel, subfamil            | 142564839 | 142571357 | TC0600003378.mm.1  | 0.4  | 0.042371 |
| TC0400003995.mm.1 | ENSMUST00000114578  | Vma21-p | VMA21 vacuolar H <sup>+</sup> -ATPase homolog (S. cerevisi | 52496939  | 52497244  | TC0400002660.mm.1  | 0.4  | 0.042399 |
| TC0400003996.mm.1 | NM_023824           | Paqr4   | progesterin and adipoQ receptor family member I            | 23736186  | 23740330  | TC1700001602.mm.1  | 0.2  | 0.042413 |
| TC0400003999.mm.1 | NM_011186           | Psmb5   | proteasome (prosome, macropain) subunit, beta              | 54614119  | 54618003  | TC1400002061.mm.1  | -0.3 | 0.042471 |
| TC0400004000.mm.1 | ENSMUST00000079363  | Gm10093 | predicted pseudogene 10093                                 | 78491565  | 78493541  | TC1700001186.mm.1  | -0.6 | 0.042485 |
| TC0400004004.mm.1 | ENSMUST00000084813  | Gm10157 | predicted gene 10157                                       | 118837613 | 118837955 | TC0900003229.mm.1  | -0.4 | 0.042488 |
| TC0400004009.mm.1 | ENSMUST00000161442  | Gm16585 | predicted gene 16585                                       | 177786856 | 177787465 | TC0100001676.mm.1  | -0.6 | 0.042512 |
| TC0400004010.mm.1 | NM_177387           | Ust     | uronyl-2-sulfotransferase                                  | 8204753   | 8518825   | TC1000001708.mm.1  | 0.2  | 0.042517 |
| TC0400004014.mm.1 | NM_008204           | H2-M2   | histocompatibility 2, M region locus 2                     | 37480851  | 37483552  | TC1700002071.mm.1  | -0.4 | 0.042537 |
| TC0400004021.mm.1 | ENSMUST00000075768  | Gm6055  | predicted gene 6055                                        | 48079136  | 48079806  | TC1400001942.mm.1  | 0.5  | 0.042539 |
| TC0400004022.mm.1 | NM_183275           | Tefm    | transcription elongation factor, mitochondrial             | 80136678  | 80142175  | TC1100003340.mm.1  | -0.2 | 0.042639 |
| TC0400004023.mm.1 | NM_001114174        | Fam189a | family with sequence similarity 189, member A2             | 23972750  | 24031019  | TC1900001270.mm.1  | 0.2  | 0.042652 |

|                   |                    |         |                                                             |           |           |                    |      |          |
|-------------------|--------------------|---------|-------------------------------------------------------------|-----------|-----------|--------------------|------|----------|
| TC0400004024.mm.1 | NM_011968          | Psma6   | proteasome (prosome, macropain) subunit, alpha              | 55384222  | 55418459  | TC1200000467.mm.1  | -0.4 | 0.042656 |
| TC0400004033.mm.1 | ENSMUST00000116865 | Gm22196 | predicted gene, 22196                                       | 7888685   | 7888793   | TC0500000042.mm.1  | -0.4 | 0.042801 |
| TC0400004049.mm.1 | ENSMUST00000121060 | Gm14287 | predicted gene, 14287                                       | 157528869 | 157528985 | TC0200005021.mm.1  | -0.4 | 0.042808 |
| TC0400004052.mm.1 | ENSMUST00000072982 | Gm5513  | predicted pseudogene 5513                                   | 14959549  | 14960766  | TC1900001200.mm.1  | -0.4 | 0.042822 |
| TC0400004083.mm.1 | NCBI_Gene:10012645 | Trav7n- | T cell receptor alpha variable 7N-6                         | 53324632  | 53326266  | TC1400000685.mm.1  | -0.3 | 0.042843 |
| TC0400004091.mm.1 | ENSMUST00000178460 | Gm12989 | predicted gene 12989                                        | 135715868 | 135716598 | TC0400003771.mm.1  | -0.7 | 0.042856 |
| TC0400004092.mm.1 | NCBI_Gene:667626:p | Trav10n | T cell receptor alpha variable 10N                          | 53122114  | 53122611  | TC1400000661.mm.1  | -0.4 | 0.043044 |
| TC0400004099.mm.1 | NM_029509          | Gbp8    | guanylate-binding protein 8                                 | 105014153 | 105053561 | TC0500003729.mm.1  | -0.4 | 0.04308  |
| TC0400004100.mm.1 | NM_010258          | Gata6   | GATA binding protein 6                                      | 11052510  | 11085635  | TC1800000091.mm.1  | 0.2  | 0.043095 |
| TC0400004118.mm.1 | NM_029620          | Pcolce2 | procollagen C-endopeptidase enhancer 2                      | 95637601  | 95698096  | TC0900001200.mm.1  | 0.5  | 0.043138 |
| TC0400004127.mm.1 | NM_178646          | Tigd5   | tigger transposable element derived 5                       | 75909735  | 75914535  | TC1500000566.mm.1  | -0.2 | 0.04314  |
| TC0400004145.mm.1 | NM_201638          | Mettl14 | methyltransferase like 14                                   | 123364645 | 123385990 | TC0300002876.mm.1  | -0.2 | 0.043264 |
| TC0400004151.mm.1 | NM_028994          | Pck2    | phosphoenolpyruvate carboxykinase 2 (mitochondrial)         | 55540266  | 55550017  | TC1400000781.mm.1  | 0.1  | 0.043317 |
| TC0400004165.mm.1 | NM_178909          | Wdr92   | WD repeat domain 92                                         | 17211893  | 17235200  | TC1100004262.mm.1  | -0.2 | 0.043347 |
| TC0400004170.mm.1 | ENSMUST00000119005 | Gm11222 | predicted gene 11222                                        | 69853947  | 69854684  | TC0400000751.mm.1  | -0.2 | 0.043358 |
| TC0400004171.mm.1 | ENSMUST00000089689 | Gm10238 | predicted pseudogene 10238                                  | 75235649  | 75238768  | TC1500001733.mm.1  | 0.2  | 0.043387 |
| TC0400004174.mm.1 | XM_992869          | Gm8841  | predicted gene 8841                                         | 105585319 | 105586200 | TC0800002828.mm.1  | -0.5 | 0.043402 |
| TC0400004187.mm.1 | NM_029454          | Pibf1   | progesterone immunomodulatory binding factor                | 99099424  | 99254494  | TC1400001153.mm.1  | -0.1 | 0.043465 |
| TC0400004188.mm.1 | ENSMUST00000175130 | Gm22646 | predicted gene, 22646                                       | 43622446  | 43622560  | TC1900000631.mm.1  | 0.4  | 0.043558 |
| TC0400004190.mm.1 | NM_028138          | Thumpd2 | THUMP domain containing 2                                   | 81026327  | 81065085  | TC1700002595.mm.1  | -0.1 | 0.043578 |
| TC0400004202.mm.1 | NM_013541          | Gstp1   | glutathione S-transferase, pi 1                             | 4035407   | 4037921   | TC1900000896.mm.1  | 0.5  | 0.043585 |
| TC0400004205.mm.1 | NCBI_Gene:633457:p | Ighv3-5 | Ighv3-5 immunoglobulin heavy variable 3-5                   | 114262652 | 114262950 | TC1200002588.mm.1  | -0.4 | 0.043602 |
| TC0400004208.mm.1 | NM_001290125       | Rbm4    | RNA binding motif protein 4 (Rbm4), transcript              | 0         | 0         | TSUnmapped0000002  | -0.2 | 0.043635 |
| TC0400004210.mm.1 | NM_144933          | Med17   | mediator complex subunit 17                                 | 15260351  | 15279867  | TC0900001784.mm.1  | -0.2 | 0.043693 |
| TC0400004212.mm.1 | ENSMUST00000183259 | Gm8565  | predicted gene 8565                                         | 69566451  | 69567464  | TC03000002138.mm.1 | 0.2  | 0.043698 |
| TC0400004214.mm.1 | NM_027434          | Rprd1b  | regulation of nuclear pre-mRNA domain containing 1          | 158028497 | 158132297 | TC0200002421.mm.1  | -0.2 | 0.043701 |
| TC0400004215.mm.1 | ENSMUST00000157216 | Gm25623 | predicted gene, 25623                                       | 34086126  | 34086233  | TC0400000296.mm.1  | 0.2  | 0.043704 |
| TC0400004224.mm.1 | NM_021433          | Stx6    | syntaxin 6                                                  | 155158703 | 155208256 | TC0100001397.mm.1  | -0.5 | 0.043802 |
| TC0500000005.mm.1 | NCBI_Gene:279872:p | Trav9n- | T cell receptor alpha variable 9N-1                         | 53101693  | 53102401  | TC1400000659.mm.1  | -0.3 | 0.043857 |
| TC0500000016.mm.1 | NM_177364          | Sh3pxd2 | SH3 and PX domains 2B                                       | 32347811  | 32428183  | TC1100000341.mm.1  | 0.3  | 0.043876 |
| TC0500000027.mm.1 | ENSMUST00000091905 | Gm4950  | predicted pseudogene 4950                                   | 51865264  | 51865881  | TC1800001328.mm.1  | -0.2 | 0.043923 |
| TC0500000032.mm.1 | NM_020566          | Dnajc4  | Dnaj (Hsp40) homolog, subfamily C, member 4                 | 6987911   | 6992503   | TC0900001028.mm.1  | 0.3  | 0.044007 |
| TC0500000039.mm.1 | ENSMUST00000165229 | Gm10269 | predicted gene 10269                                        | 20682592  | 20682963  | TC1800001047.mm.1  | -0.8 | 0.04411  |
| TC0500000041.mm.1 | ENSMUST00000119735 | Gm11644 | predicted gene 11644                                        | 143349512 | 143349661 | TC0200002129.mm.1  | -0.3 | 0.044152 |
| TC0500000042.mm.1 | ENSMUST00000061772 | Rbm15   | RNA binding motif protein 15                                | 107326110 | 107333289 | TC0300002706.mm.1  | -0.3 | 0.044204 |
| TC0500000043.mm.1 | ENSMUST00000158371 | Gm22765 | predicted gene, 22765                                       | 9614314   | 9614441   | TC1800000061.mm.1  | -0.2 | 0.044208 |
| TC0500000045.mm.1 | ENSMUST00000145417 | Cd63-ps | CD63 antigen, pseudogene                                    | 50134726  | 50135600  | TC1800000510.mm.1  | 0.3  | 0.04439  |
| TC0500000047.mm.1 | NM_133740          | Prmt3   | protein arginine N-methyltransferase 3                      | 49778346  | 49858265  | TC0700000904.mm.1  | -0.1 | 0.044393 |
| TC0500000055.mm.1 | NM_001104927       | Cyp2j8  | cytochrome P450, family 2, subfamily j, polypeptide 8       | 96444588  | 96507386  | TC0400003096.mm.1  | 0.1  | 0.044427 |
| TC0500000058.mm.1 | NM_019992          | Stap1   | signal transducing adaptor family member 1                  | 86071746  | 86103993  | TC0500000785.mm.1  | -0.8 | 0.044447 |
| TC0500000070.mm.1 | ENSMUST00000157125 | Gm23468 | predicted gene, 23468                                       | 77569495  | 77569602  | TC0800002502.mm.1  | 0.2  | 0.044513 |
| TC0500000083.mm.1 | XM_195264          | Gm5058  | predicted gene 5058                                         | 32704473  | 32704940  | TC0700002801.mm.1  | -0.2 | 0.044574 |
| TC0500000107.mm.1 | XM_001001333       | Gm9156  | predicted gene 9156                                         | 32931370  | 32931837  | TC0700002804.mm.1  | -0.2 | 0.044574 |
| TC0500000108.mm.1 | ENSMUST00000104206 | Gm24339 | predicted gene, 24339                                       | 15326464  | 15326539  | TC0900001788.mm.1  | -0.9 | 0.04458  |
| TC0500000109.mm.1 | NCBI_Gene:10012645 | Trav6n- | T cell receptor alpha variable 6N-5                         | 53104871  | 53105369  | TC1400000660.mm.1  | -0.7 | 0.044651 |
| TC0500000152.mm.1 | ENSMUST00000180098 | Gm26139 | predicted gene, 26139                                       | 98624190  | 98624296  | TC1400001150.mm.1  | 0.2  | 0.044656 |
| TC0500000161.mm.1 | NM_001253804       | Slc12a4 | solute carrier family 12, member 4                          | 105943590 | 105966115 | TC0800002844.mm.1  | 0.2  | 0.044669 |
| TC0500000171.mm.1 | NM_001035228       | St3gal5 | ST3 beta-galactoside alpha-2,3-sialyltransferase 5          | 72097608  | 72154570  | TC0600000841.mm.1  | 0.2  | 0.044726 |
| TC0500000172.mm.1 | ENSMUST00000117205 | Gm13423 | predicted gene 13423                                        | 23202033  | 23203683  | TC0200000364.mm.1  | -0.2 | 0.044736 |
| TC0500000179.mm.1 | NM_001009573       | Unc13d  | unc-13 homolog D (C. elegans)                               | 116062095 | 116077961 | TC1100004101.mm.1  | -0.1 | 0.044757 |
| TC0500000200.mm.1 | NR_040440          | Alms1-p | Alstrom syndrome 1, pseudogene 2                            | 85774393  | 85804057  | TC0600000968.mm.1  | -0.1 | 0.04479  |
| TC0500000210.mm.1 | ENSMUST00000117401 | Gm9266  | predicted gene 9266                                         | 42951724  | 42952207  | TC0700000748.mm.1  | -0.1 | 0.044799 |
| TC0500000212.mm.1 | NM_020601          | Tbl1x   | transducin (beta)-like 1 X-linked                           | 77511013  | 77662983  | TC0X00000772.mm.1  | 0.3  | 0.044831 |
| TC0500000217.mm.1 | NR_035488          | Mir1962 | microRNA 1962                                               | 135566162 | 135566282 | TC0700001961.mm.1  | 0.2  | 0.044867 |
| TC0500000220.mm.1 | NM_178692          | C130074 | RIKEN cDNA C130074G19 gene                                  | 184871926 | 184883218 | TC0100003742.mm.1  | -0.2 | 0.044891 |
| TC0500000221.mm.1 | ENSMUST00000101630 | Ap3s1-p | adaptor-related protein complex 3, sigma 1 subunit          | 38685518  | 38686277  | TC0X00002088.mm.1  | -0.3 | 0.044896 |
| TC0500000233.mm.1 | NM_021476          | Cysl1r1 | cysteinyl leukotriene receptor 1                            | 106574346 | 106603679 | TC0X00002834.mm.1  | 0.2  | 0.044901 |
| TC0500000240.mm.1 | NM_144923          | Blvrb   | biliverdin reductase B (flavin reductase (NADPH-dependent)) | 27447978  | 27466144  | TC0700000458.mm.1  | 0.2  | 0.044907 |
| TC0500000260.mm.1 | NM_001040403       | Flot2   | flotillin 2                                                 | 78037931  | 78060434  | TC1100001140.mm.1  | 0.2  | 0.04491  |
| TC0500000273.mm.1 | NM_007684          | Cetn3   | centrin 3                                                   | 81783258  | 81797157  | TC1300000969.mm.1  | -0.3 | 0.044911 |
| TC0500000274.mm.1 | NM_027857          | Acy3    | aspartoacylase (aminoacylase) 3                             | 3986571   | 3990007   | TC1900000022.mm.1  | 0.6  | 0.04495  |
| TC0500000287.mm.1 | NM_008704          | Nme1    | NME/NM23 nucleoside diphosphate kinase 1                    | 93956979  | 93968521  | TC1100004296.mm.1  | -0.1 | 0.044983 |
| TC0500000295.mm.1 | NM_010807          | Marcks1 | MARCKS-like 1                                               | 129513581 | 129515985 | TC0400001525.mm.1  | -0.1 | 0.045046 |
| TC0500000301.mm.1 | NM_007534          | Bcl2a1b | B cell leukemia/lymphoma 2 related protein A1b              | 89199209  | 89207838  | TC0900003331.mm.1  | -0.2 | 0.045057 |
| TC0500000303.mm.1 | NM_001085390       | Dusp5   | dual specificity phosphatase 5                              | 53529109  | 53542431  | TC1900000756.mm.1  | -0.2 | 0.045106 |
| TC0500000316.mm.1 | ENSMUST00000079229 | Gm10323 | predicted gene 10323                                        | 66852174  | 66854872  | TC1300002235.mm.1  | -0.2 | 0.045113 |
| TC0500000321.mm.1 | ENSMUST00000104062 | Gm26075 | predicted gene, 26075                                       | 8501236   | 8501356   | TC0600001849.mm.1  | -0.2 | 0.045135 |
| TC0500000325.mm.1 | NM_053223          | V1ra8   | vomeronal 1 receptor, A8                                    | 90202793  | 90203682  | TC0600001065.mm.1  | 0.2  | 0.045159 |
| TC0500000334.mm.1 | NR_033574          | Nut2-p  | nuclear transport factor 2, pseudogene 1                    | 53588151  | 53589067  | TC1900001677.mm.1  | -0.9 | 0.045232 |
| TC0500000336.mm.1 | NM_001034851       | Fam134b | family with sequence similarity 134, member B               | 25843264  | 25973696  | TC1500000165.mm.1  | -0.2 | 0.045245 |
| TC0500000338.mm.1 | NCBI_Gene:10004327 | Trav12n | Trav12n-2 T cell receptor alpha variable 12N-2              | 53226773  | 53227405  | TC1400000673.mm.1  | -0.3 | 0.045257 |
| TC0500000339.mm.1 | ENSMUST00000180120 | Gm23569 | predicted gene, 23569                                       | 10492620  | 10492739  | TC0200000148.mm.1  | -0.2 | 0.045265 |
| TC0500000348.mm.1 | NM_029682          | Stambpl | STAM binding protein like 1                                 | 34192229  | 34240333  | TC1900000495.mm.1  | -0.3 | 0.045286 |
| TC0500000349.mm.1 | NM_016861          | Pdlim1  | PDZ and LIM domain 1 (elfin)                                | 40221173  | 40271842  | TC1900001484.mm.1  | -0.3 | 0.045315 |
| TC0500000352.mm.1 | NR_029963          | Mir450- | microRNA 450-1                                              | 53048154  | 53048244  | TC0X00002231.mm.1  | 0.2  | 0.045393 |
| TC0500000356.mm.1 | NM_021528          | Chst12  | carbohydrate sulfotransferase 12                            | 140505550 | 140525724 | TC0500001694.mm.1  | 0.1  | 0.045482 |
| TC0500000362.mm.1 | NM_020619          | Mogs    | mannosyl-oligosaccharide glucosidase                        | 83115496  | 83118898  | TC0600000922.mm.1  | -0.2 | 0.045573 |
| TC0500000369.mm.1 | ENSMUST00000166375 | Defa-ps | defensin, alpha, pseudogene 7                               | 21231327  | 21232233  | TC0800001840.mm.1  | -0.2 | 0.04559  |

|                   |                    |         |                                                 |           |           |                    |      |          |
|-------------------|--------------------|---------|-------------------------------------------------|-----------|-----------|--------------------|------|----------|
| TC0500000378.mm.1 | ENSMUST00000178243 | Gm4904  | predicted gene 4904                             | 3254679   | 3255873   | TC1400001360.mm.1  | -0.2 | 0.04564  |
| TC0500000379.mm.1 | NM_018883          | Camkk1  | calcium/calmodulin-dependent protein kinase ki  | 73019008  | 73042073  | TC1100001012.mm.1  | -0.2 | 0.045671 |
| TC0500000388.mm.1 | ENSMUST00000157169 | Gm25966 | predicted gene, 25966                           | 61798180  | 61798296  | TC0200000926.mm.1  | -0.3 | 0.045684 |
| TC0500000396.mm.1 | ENSMUST00000062156 | Gm9795  | predicted pseudogene 9795                       | 56655949  | 56656889  | TC1000000497.mm.1  | 0.2  | 0.045686 |
| TC0500000409.mm.1 | NM_018808          | Dnajb1  | Dnaj (Hsp40) homolog, subfamily B, member 1     | 83608175  | 83611903  | TC0800000929.mm.1  | -0.2 | 0.045707 |
| TC0500000413.mm.1 | NM_001199940       | Serpina | serine (or cysteine) peptidase inhibitor, clade | 104263122 | 104269372 | TC1200001041.mm.1  | -0.1 | 0.045708 |
| TC0500000425.mm.1 | ENSMUST00000082900 | Gm25696 | predicted gene, 25696                           | 35735373  | 35735477  | TC0300000257.mm.1  | 0.3  | 0.045721 |
| TC0500000434.mm.1 | ENSMUST00000082854 | Gm22683 | predicted gene, 22683                           | 102829878 | 102830014 | TC1100001699.mm.1  | -0.3 | 0.045727 |
| TC0500000436.mm.1 | ENSMUST00000158220 | Gm26355 | predicted gene, 26355                           | 116904637 | 116904741 | TC0400001271.mm.1  | 0.3  | 0.045738 |
| TC0500000441.mm.1 | NM_026506          | Snrpg   | small nuclear ribonucleoprotein polypeptide G   | 86371504  | 86378903  | TC0600000986.mm.1  | -0.2 | 0.045757 |
| TC0500000449.mm.1 | ENSMUST00000082580 | Gm22455 | predicted gene, 22455                           | 64177123  | 64177193  | TC0900000815.mm.1  | -0.5 | 0.045777 |
| TC0500000450.mm.1 | NM_008799          | Pdcd2   | programmed cell death 2                         | 15519208  | 15527301  | TC1700001500.mm.1  | -0.2 | 0.045794 |
| TC0500000462.mm.1 | ENSMUST00000120511 | Gm16053 | predicted gene 16053                            | 97406140  | 97406327  | TC0700001350.mm.1  | -0.4 | 0.045795 |
| TC0500000465.mm.1 | NM_133966          | Taf5l   | TAF5-like RNA polymerase II, p300/CBP-associat  | 123996310 | 124021309 | TC0800003164.mm.1  | -0.3 | 0.04582  |
| TC0500000468.mm.1 | ENSMUST00000178832 | Gm21958 | predicted gene, 21958                           | 54713176  | 54714353  | TC0300001986.mm.1  | 0.3  | 0.045826 |
| TC0500000470.mm.1 | NR_039597          | Mir5135 | microRNA 5135                                   | 76533134  | 76533212  | TC1200001951.mm.1  | -0.2 | 0.046124 |
| TC0500000505.mm.1 | NR_030153          | Mir470  | microRNA 470                                    | 66813951  | 66814025  | TC0X00002353.mm.1  | 0.2  | 0.046138 |
| TC0500000512.mm.1 | ENSMUST00000098479 | Zfp319  | zinc finger protein 319                         | 95323014  | 95325263  | TC0800002742.mm.1  | -0.2 | 0.046146 |
| TC0500000516.mm.1 | ENSMUST00000119371 | Gm9103  | predicted gene 9103                             | 102178194 | 102178657 | TC0X00002737.mm.1  | -0.8 | 0.046165 |
| TC0500000519.mm.1 | ENSMUST00000098864 | Gm10689 | predicted gene 10689                            | 25454260  | 25454704  | TC0800000320.mm.1  | -0.5 | 0.046189 |
| TC0500000527.mm.1 | ENSMUST00000122484 | Gm25945 | predicted gene, 25945                           | 88707158  | 88707292  | TC0300000735.mm.1  | -0.1 | 0.046247 |
| TC0500000531.mm.1 | NM_008187          | Gtl3    | gene trap locus 3                               | 95420249  | 95434869  | TC0800002744.mm.1  | -0.1 | 0.046266 |
| TC0500000542.mm.1 | ENSMUST00000174935 | Gm24104 | predicted gene, 24104                           | 10172022  | 10172099  | TC0600001856.mm.1  | -0.3 | 0.046281 |
| TC0500000547.mm.1 | NM_011606          | Clec3b  | C-type lectin domain family 3, member b         | 123150946 | 123157432 | TC0900001658.mm.1  | 0.3  | 0.046359 |
| TC0500000554.mm.1 | ENSMUST00000178959 | Gm7901  | predicted gene 7901                             | 75711462  | 75713288  | TC0800002488.mm.1  | 0.4  | 0.046377 |
| TC0500000560.mm.1 | NM_146230          | Acaa1b  | acetyl-Coenzyme A acyltransferase 1B            | 119148023 | 119157093 | TC0900003234.mm.1  | 0.3  | 0.046441 |
| TC0500000579.mm.1 | ENSMUST00000084009 | Gm23794 | predicted gene, 23794                           | 162114238 | 162114341 | TC0X00001642.mm.1  | 0.3  | 0.046445 |
| TC0500000580.mm.1 | NM_001079865       | Ces2f   | carboxylesterase 2F                             | 104947356 | 104958577 | TC0800001197.mm.1  | -0.1 | 0.046448 |
| TC0500000584.mm.1 | ENSMUST00000120026 | Gm13588 | predicted gene 13588                            | 38490104  | 38490238  | TC0200000700.mm.1  | -1.1 | 0.046525 |
| TC0500000589.mm.1 | NM_145428          | Dhrs7b  | dehydrogenase/reductase (SDR family) member     | 60830631  | 60860195  | TC1100000767.mm.1  | 0.3  | 0.046551 |
| TC0500000603.mm.1 | NM_008517          | Lta4h   | leukotriene A4 hydrolase                        | 93453396  | 93484896  | TC1000001131.mm.1  | -0.4 | 0.046586 |
| TC0500000605.mm.1 | NM_001162933       | Rpl10l  | ribosomal protein L10-like                      | 66283379  | 66284401  | TC1200001841.mm.1  | -0.2 | 0.046635 |
| TC0500000606.mm.1 | NM_007920          | Elf1    | E74-like factor 1                               | 79481194  | 79582491  | TC1400001105.mm.1  | -0.9 | 0.046646 |
| TC0500000609.mm.1 | ENSMUST00000117234 | Gm14400 | predicted gene 14400                            | 177225473 | 177228963 | TC0200005362.mm.1  | 0.6  | 0.046674 |
| TC0500000621.mm.1 | NM_144849          | Ankrd54 | ankyrin repeat domain 54                        | 79053094  | 79062893  | TC1500001859.mm.1  | -0.1 | 0.046697 |
| TC0500000624.mm.1 | NM_007381          | Acadl   | acyl-Coenzyme A dehydrogenase, long-chain       | 66830839  | 66863309  | TC0100002495.mm.1  | 0.7  | 0.046706 |
| TC0500000633.mm.1 | NM_001198949       | Ralbp1  | ralA binding protein 1                          | 65848415  | 65885755  | TC1700002416.mm.1  | -0.2 | 0.046805 |
| TC0500000643.mm.1 | NM_001113470       | Ctdsp2  | CTD (carboxy-terminal domain, RNA polymerase    | 126978717 | 126999975 | TC1000001542.mm.1  | 0.4  | 0.046828 |
| TC0500000660.mm.1 | NM_007405          | Adcy6   | adenylate cyclase 6                             | 98589978  | 98607633  | TC1500002181.mm.1  | 0.2  | 0.046902 |
| TC0500000662.mm.1 | ENSMUST00000160140 | Gm16165 | predicted gene 16165                            | 22669734  | 22670528  | TC0900001913.mm.1  | -0.3 | 0.046907 |
| TC0500000667.mm.1 | ENSMUST00000117071 | Gm11249 | predicted gene 11249                            | 67930881  | 67931739  | TC0400000745.mm.1  | -0.4 | 0.047101 |
| TC0500000675.mm.1 | ENSMUST00000183660 | AL59096 | N/A                                             | 100442395 | 100442475 | TC1100003772.mm.1  | -0.3 | 0.047116 |
| TC0500000707.mm.1 | NM_001042710       | Prss57  | protease, serine 57                             | 79781474  | 79790961  | TC1000002479.mm.1  | -0.1 | 0.047192 |
| TC0500000709.mm.1 | XM_003688879       | Gm20746 | predicted gene, 20746                           | 130592136 | 130594245 | TC1000003212.mm.1  | 0.7  | 0.047392 |
| TC0500000715.mm.1 | NCBI_Gene:243433:p | Igkv17- | immunoglobulin kappa variable 17-127            | 67861159  | 67861659  | TC06000003510.mm.1 | -1.0 | 0.047432 |
| TC0500000724.mm.1 | NM_026321          | Gm174a  | family with sequence similarity 174, member A   | 95313623  | 95335284  | TC0100000957.mm.1  | 0.2  | 0.047533 |
| TC0500000731.mm.1 | NM_178192          | Hist1h4 | histone cluster 1, H4a                          | 23760692  | 23761249  | TC1300001645.mm.1  | -0.3 | 0.047605 |
| TC0500000739.mm.1 | NM_010881          | Ncoa1   | nuclear receptor coactivator 1                  | 4247362   | 4477182   | TC1200001353.mm.1  | 0.3  | 0.047612 |
| TC0500000746.mm.1 | NM_001081034       | Fbxo11  | F-box protein 11                                | 87990859  | 88065291  | TC1700002701.mm.1  | -0.2 | 0.047624 |
| TC0500000747.mm.1 | NM_001081005       | 1500012 | RIKEN cDNA 1500012F01 gene                      | 167062934 | 167065862 | TC0200002580.mm.1  | -0.2 | 0.047634 |
| TC0500000748.mm.1 | NR_037282          | Mir3100 | microRNA 3100                                   | 19086828  | 19086892  | TC050000286.mm.1   | 0.2  | 0.047681 |
| TC0500000749.mm.1 | ENSMUST00000158610 | Gm23119 | predicted gene, 23119                           | 74778561  | 74778700  | TC1800001591.mm.1  | -0.6 | 0.047682 |
| TC0500000772.mm.1 | ENSMUST00000117806 | Gm15576 | predicted gene 15576                            | 100726234 | 100726760 | TC0600001155.mm.1  | -0.3 | 0.047883 |
| TC0500000783.mm.1 | XM_001480374       | Gm11686 | predicted gene 11686                            | 143877464 | 143881509 | TC0200002134.mm.1  | -0.2 | 0.047949 |
| TC0500000785.mm.1 | ENSMUST00000158924 | Gm25831 | predicted gene, 25831                           | 97967829  | 97967991  | TC1400002584.mm.1  | 0.2  | 0.048091 |
| TC0500000786.mm.1 | NM_026873          | Ptcd2   | pentatricopeptide repeat domain 2               | 99319649  | 99344678  | TC1300002517.mm.1  | -0.3 | 0.048238 |
| TC0500000796.mm.1 | NM_016905          | Galk1   | galactokinase 1                                 | 116008357 | 116012719 | TC1100004099.mm.1  | -0.2 | 0.048268 |
| TC0500000809.mm.1 | NR_028521          | Snord11 | small nucleolar RNA, C/D box 11                 | 59704790  | 59704873  | TC0100000460.mm.1  | -1.4 | 0.048269 |
| TC0500000813.mm.1 | NM_007795          | Ctf1    | cardiotrophin 1                                 | 127712736 | 127718192 | TC0700001860.mm.1  | -0.2 | 0.048273 |
| TC0500000830.mm.1 | ENSMUST00000075377 | Gm6564  | predicted pseudogene 6564                       | 22931390  | 22932034  | TC0500002043.mm.1  | -0.3 | 0.048311 |
| TC0500000831.mm.1 | NM_001081317       | Zfand4  | zinc finger, AN1-type domain 4                  | 116264222 | 116330298 | TC0600001294.mm.1  | -0.2 | 0.048437 |
| TC0500000834.mm.1 | ENSMUST00000154610 | Gm12906 | predicted gene 12906                            | 107760025 | 107760468 | TC0400003226.mm.1  | -0.2 | 0.048462 |
| TC0500000836.mm.1 | NM_033174          | Snurf   | SNRPN upstream reading frame                    | 59982495  | 60140219  | TC0700004652.mm.1  | 0.3  | 0.048466 |
| TC0500000842.mm.1 | ENSMUST00000182436 | Gm5864  | predicted gene 5864                             | 32420003  | 32420972  | TC0500000338.mm.1  | -0.3 | 0.048521 |
| TC0500000843.mm.1 | NM_021505          | Anapc5  | anaphase-promoting complex subunit 5            | 122787459 | 122821342 | TC0500003220.mm.1  | -0.5 | 0.048521 |
| TC0500000844.mm.1 | XM_003084682       | Gm15448 | predicted gene 15448                            | 3816781   | 3825687   | TC0700004633.mm.1  | 0.2  | 0.048522 |
| TC0500000868.mm.1 | ENSMUST00000092720 | 5430403 | RIKEN cDNA 5430403G16 gene                      | 109674545 | 109691041 | TC0500002971.mm.1  | -0.3 | 0.048583 |
| TC0500000869.mm.1 | NM_011332          | Ccl17   | chemokine (C-C motif) ligand 17                 | 94810453  | 94812036  | TC0800001121.mm.1  | -0.3 | 0.048588 |
| TC0500000901.mm.1 | NCBI_Gene:671927:p | Trav9d- | T cell receptor alpha variable 9D-1             | 52792208  | 52792913  | TC1400000628.mm.1  | -0.3 | 0.048624 |
| TC0500000920.mm.1 | NM_001110195       | Echdc1  | enoyl Coenzyme A hydratase domain containing    | 29313166  | 29346661  | TC1000000265.mm.1  | 0.3  | 0.048666 |
| TC0500000921.mm.1 | NM_020295          | Lmbr1   | limb region 1                                   | 29229802  | 29378390  | TC0500002139.mm.1  | 0.2  | 0.048676 |
| TC0500000922.mm.1 | ENSMUST00000117765 | Gm6226  | predicted gene 6226                             | 58836793  | 58837938  | TC0700003115.mm.1  | -0.3 | 0.048786 |
| TC0500000924.mm.1 | NM_008593          | Foxd2   | forkhead box D2                                 | 114906280 | 114908898 | TC0400003307.mm.1  | -0.2 | 0.048874 |
| TC0500000925.mm.1 | NM_001101472       | Serpina | serine (or cysteine) peptidase inhibitor, clade | 104314553 | 104320725 | TC1200001043.mm.1  | 0.1  | 0.048874 |
| TC0500000928.mm.1 | NM_181821          | Hcfc1r1 | host cell factor C1 regulator 1 (XPO1-dependent | 23673596  | 23675524  | TC1700000315.mm.1  | 0.2  | 0.048883 |
| TC0500000938.mm.1 | NM_019421          | Cd320   | CD320 antigen                                   | 33843091  | 33849774  | TC1700000595.mm.1  | 0.2  | 0.048947 |
| TC0500000946.mm.1 | ENSMUST00000114212 | Igkv12- | immunoglobulin kappa variable 12-47             | 69750856  | 69751310  | TC0600002444.mm.1  | -0.2 | 0.04902  |
| TC0500000948.mm.1 | ENSMUST00000120661 | Gm9159  | predicted gene 9159                             | 103597771 | 103598336 | TC0X00001035.mm.1  | -0.4 | 0.049104 |

|                   |                    |         |                                                                          |           |           |                    |      |          |
|-------------------|--------------------|---------|--------------------------------------------------------------------------|-----------|-----------|--------------------|------|----------|
| TC0500000951.mm.1 | NM_025658          | Ms4a4d  | membrane-spanning 4-domains, subfamily A, member 4                       | 11536801  | 11558467  | TC1900000226.mm.1  | 0.3  | 0.049119 |
| TC0500000952.mm.1 | NM_010059          | Dmc1    | DMC1 dosage suppressor of mck1 homolog, mei-1                            | 79561498  | 79605109  | TC1500001878.mm.1  | -0.1 | 0.049136 |
| TC0500000953.mm.1 | NM_015755          | Hunk    | horizontally upregulated Neu-associated kinase                           | 90386336  | 90499553  | TC1600000982.mm.1  | -0.1 | 0.04915  |
| TC0500000969.mm.1 | ENSMUST00000170101 | Gm17576 | predicted gene, 17576                                                    | 71042645  | 71043040  | TC0800002418.mm.1  | -0.3 | 0.049171 |
| TC0500000971.mm.1 | NM_134068          | Dusp22  | dual specificity phosphatase 22                                          | 30659999  | 30711232  | TC1300000336.mm.1  | 0.2  | 0.049185 |
| TC0500000976.mm.1 | NM_025543          | Mcts2   | malignant T cell amplified sequence 2                                    | 152687035 | 152687951 | TC02000002296.mm.1 | -0.2 | 0.049262 |
| TC0500000977.mm.1 | ENSMUST00000102084 | Gm22774 | predicted gene, 22774                                                    | 6131836   | 6132405   | TC1700001380.mm.1  | 0.7  | 0.049309 |
| TC0500000978.mm.1 | NM_023260          | Mrps34  | mitochondrial ribosomal protein S34                                      | 24895116  | 24896289  | TC1700002770.mm.1  | 0.1  | 0.049323 |
| TC0500000981.mm.1 | NCBI_Gene:10012647 | Trav4-3 | T cell receptor alpha variable 4-3                                       | 53598857  | 53599414  | TC1400002825.mm.1  | -0.4 | 0.049329 |
| TC0500000986.mm.1 | NCBI_Gene:10012429 | Traj57  | T cell receptor alpha joining 57                                         | 54158505  | 54158569  | TC1400000726.mm.1  | -0.5 | 0.04942  |
| TC0500001014.mm.1 | NM_001198955       | Gm7694  | predicted gene 7694                                                      | 170298193 | 170306332 | TC0100003886.mm.1  | 0.2  | 0.04953  |
| TC0500001017.mm.1 | NCBI_Gene:668597:p | Ighv1-8 | immunoglobulin heavy variable 1-85                                       | 116000028 | 116000461 | TC1200002664.mm.1  | -1.2 | 0.049614 |
| TC0500001022.mm.1 | NM_020590          | Gabarap | gamma-aminobutyric acid (GABA) A receptor-associated protein 1           | 129533192 | 129542331 | TC0600001536.mm.1  | 0.5  | 0.049727 |
| TC0500001024.mm.1 | ENSMUST00000178107 | Ap3s1-p | adaptor-related protein complex 3, sigma 1 subunit                       | 94405211  | 94405792  | TC0800001108.mm.1  | -0.7 | 0.04994  |
| TC0500001028.mm.1 | ENSMUST00000077516 | Gm10169 | predicted pseudogene 10169                                               | 29965100  | 29965640  | TC07000002739.mm.1 | -0.5 | 0.049989 |
| TC0500001034.mm.1 | NM_011277          | Rnf2    | ring finger protein 2                                                    | 151469406 | 151500823 | TC0100003254.mm.1  | -0.3 | 0.050004 |
| TC0500001035.mm.1 | NM_181344          | C1rl    | complement component 1, r subcomponent-like                              | 124493113 | 124510643 | TC0600001421.mm.1  | 0.2  | 0.050029 |
| TC0500001038.mm.1 | ENSMUST00000052440 | Oaz1-ps | ornithine decarboxylase antizyme 1, pseudogene                           | 17345456  | 17346140  | TC1700001512.mm.1  | -0.5 | 0.050137 |
| TC0500001062.mm.1 | NM_018738          | Igtp    | interferon gamma induced GTPase                                          | 58199556  | 58207592  | TC1100004265.mm.1  | -0.5 | 0.050144 |
| TC0500001063.mm.1 | ENSMUST00000119004 | Gm12565 | predicted gene 12565                                                     | 37599424  | 37600072  | TC0300001874.mm.1  | -0.3 | 0.050175 |
| TC0500001075.mm.1 | NM_198301          | Fam105a | family with sequence similarity 105, member A                            | 27655071  | 27681542  | TC1500001300.mm.1  | -0.3 | 0.050373 |
| TC0500001088.mm.1 | ENSMUST00000103739 | Traj1   | T cell receptor alpha joining 1                                          | 54218840  | 54218840  | TC1400000740.mm.1  | -0.6 | 0.050401 |
| TC0500001089.mm.1 | NM_019583          | Il17rb  | interleukin 17 receptor B                                                | 29996138  | 30008896  | TC1400001655.mm.1  | -0.2 | 0.05043  |
| TC0500001099.mm.1 | XR_141372          | Gm9938  | predicted gene 9938                                                      | 23722586  | 23725752  | TC1900000383.mm.1  | 0.2  | 0.050433 |
| TC0500001113.mm.1 | NM_001163794       | Pdk1l   | PDLIM1 interacting kinase 1 like                                         | 134275002 | 134287895 | TC04000003736.mm.1 | -0.2 | 0.05044  |
| TC0500001124.mm.1 | ENSMUST00000158804 | Gm26004 | predicted gene, 26004                                                    | 181840453 | 181840568 | TC0100003698.mm.1  | -0.4 | 0.050489 |
| TC0500001131.mm.1 | NM_013933          | Vapa    | vesicle-associated membrane protein, associated with vesicle trafficking | 65580053  | 65613555  | TC1700002411.mm.1  | -0.3 | 0.050491 |
| TC0500001136.mm.1 | ENSMUST00000082458 | Gm23626 | predicted gene, 23626                                                    | 84380449  | 84380581  | TC0800002581.mm.1  | -0.7 | 0.050515 |
| TC0500001149.mm.1 | ENSMUST00000170565 | Gm14416 | predicted gene 14416                                                     | 177138660 | 177142331 | TC02000005492.mm.1 | 0.6  | 0.050557 |
| TC0500001152.mm.1 | NM_025424          | Nenf    | neuron derived neurotrophic factor                                       | 191306789 | 191318194 | TC0100003805.mm.1  | 0.2  | 0.05057  |
| TC0500001155.mm.1 | ENSMUST00000158617 | Gm24056 | predicted gene, 24056                                                    | 77242406  | 77242551  | TC1500001803.mm.1  | 0.2  | 0.050596 |
| TC0500001162.mm.1 | ENSMUST00000121414 | Rps2-ps | ribosomal protein S2, pseudogene 9                                       | 27784427  | 27785243  | TC1700000466.mm.1  | -0.4 | 0.050597 |
| TC0500001170.mm.1 | NM_019547          | Rbm38   | RNA binding motif protein 38                                             | 173020498 | 173034734 | TC0200002678.mm.1  | -0.2 | 0.050695 |
| TC0500001180.mm.1 | NM_008331          | Ifit1   | interferon-induced protein with tetratricopeptide repeats                | 34640871  | 34650009  | TC1900000504.mm.1  | -0.3 | 0.050711 |
| TC0500001183.mm.1 | NM_145449          | Ifi27l2 | interferon, alpha-inducible protein 27 like 2B                           | 103450898 | 103457223 | TC1200002270.mm.1  | 0.1  | 0.050781 |
| TC0500001188.mm.1 | ENSMUST00000122422 | Rpl19-p | ribosomal protein L19, pseudogene 11                                     | 19492906  | 19493623  | TC0800000188.mm.1  | -0.8 | 0.050833 |
| TC0500001202.mm.1 | ENSMUST00000122385 | Gm15975 | predicted gene 15975                                                     | 55624188  | 55625593  | TC0500000554.mm.1  | -0.3 | 0.050909 |
| TC0500001210.mm.1 | NM_008012          | Akr1b8  | aldo-keto reductase family 1, member B8                                  | 34354119  | 34368463  | TC0600000324.mm.1  | 0.5  | 0.050911 |
| TC0500001217.mm.1 | NM_001166736       | Vmn1r91 | vomeronal 1 receptor 91                                                  | 20101158  | 20102081  | TC0700000317.mm.1  | 0.2  | 0.050964 |
| TC0500001219.mm.1 | NM_145484          | Zfp758  | zinc finger protein 758                                                  | 22361453  | 22377281  | TC1700000290.mm.1  | -0.2 | 0.051085 |
| TC0500001223.mm.1 | NM_007636          | Ct2     | chaperonin containing Tcp1, subunit 2 (beta)                             | 117050998 | 117063814 | TC1600002920.mm.1  | -0.5 | 0.051088 |
| TC0500001225.mm.1 | NM_028836          | Ctbs    | chitinase, di-N-acetyl-                                                  | 146450470 | 146465849 | TC0300001492.mm.1  | 0.3  | 0.051162 |
| TC0500001233.mm.1 | ENSMUST00000121374 | Gm12151 | predicted gene 12151                                                     | 43463196  | 43463485  | TC1100002568.mm.1  | -0.3 | 0.051265 |
| TC0500001237.mm.1 | XM_485792          | Gm5576  | predicted pseudogene 5576                                                | 78215878  | 78217113  | TC0600000873.mm.1  | -0.3 | 0.051315 |
| TC0500001252.mm.1 | ENSMUST00000082464 | Gm23628 | predicted gene, 23628                                                    | 20614523  | 20614695  | TC0X00001926.mm.1  | -0.2 | 0.051346 |
| TC0500001255.mm.1 | NM_010210          | Fhit    | fragile histidine triad gene                                             | 9550092   | 11162035  | TC1400001445.mm.1  | 0.1  | 0.051395 |
| TC0500001257.mm.1 | ENSMUST00000158968 | Gm26159 | predicted gene, 26159                                                    | 8336993   | 8337096   | TC1600000086.mm.1  | 0.3  | 0.051461 |
| TC0500001262.mm.1 | NM_030225          | Dlst    | dihydrolipoamide S-succinyltransferase (E2 component)                    | 85110833  | 85134845  | TC1200000828.mm.1  | 0.4  | 0.051463 |
| TC0500001263.mm.1 | NM_028151          | Skiv2l2 | superkiller viralicidic activity 2-like 2 (S. cerevisiae)                | 112867772 | 112927380 | TC1300002686.mm.1  | -0.3 | 0.051565 |
| TC0500001266.mm.1 | NM_009091          | Rps15   | ribosomal protein S15                                                    | 80292431  | 80294114  | TC1000000850.mm.1  | -0.4 | 0.051567 |
| TC0500001305.mm.1 | NM_198671          | Gse1    | genetic suppressor element 1                                             | 120230536 | 120581390 | TC0800001437.mm.1  | -0.2 | 0.051656 |
| TC0500001307.mm.1 | NM_019925          | Gpr132  | G protein-coupled receptor 132                                           | 112850876 | 112860916 | TC1200002440.mm.1  | -0.4 | 0.051763 |
| TC0500001308.mm.1 | NCBI_Gene:547329:p | Trav16d | T cell receptor alpha variable 16D-DV11                                  | 53047287  | 53047821  | TC1400000655.mm.1  | -0.9 | 0.051804 |
| TC0500001322.mm.1 | ENSMUST00000165448 | Gm8379  | predicted gene 8379                                                      | 7418908   | 7420099   | TC1400000066.mm.1  | -0.2 | 0.051954 |
| TC0500001327.mm.1 | NR_004418          | Rnu73b  | U73B small nuclear RNA                                                   | 86140617  | 86140688  | TC0300002265.mm.1  | -0.8 | 0.05197  |
| TC0500001331.mm.1 | ENSMUST00000079794 | Gm15732 | predicted gene 15732                                                     | 37404384  | 37404941  | TC0500002273.mm.1  | -0.2 | 0.052019 |
| TC0500001332.mm.1 | NM_001100606       | Adat3   | adenosine deaminase, tRNA-specific 3                                     | 80602880  | 80615784  | TC1000000864.mm.1  | 0.2  | 0.05204  |
| TC0500001334.mm.1 | XR_140718          | 2310040 | RIKEN cDNA 2310040G07 gene                                               | 76928368  | 76947758  | TC0500000731.mm.1  | 0.2  | 0.052076 |
| TC0500001338.mm.1 | NM_009982          | Ctsc    | cathepsin C                                                              | 88278085  | 88310888  | TC0700001258.mm.1  | 0.3  | 0.052107 |
| TC0500001342.mm.1 | ENSMUST00000121029 | Gm14776 | predicted gene 14776                                                     | 87771339  | 87772352  | TC0X00002581.mm.1  | -0.2 | 0.052152 |
| TC0500001354.mm.1 | NR_040256          | Gm14405 | predicted gene 14405                                                     | 176289943 | 176302568 | TC0200002736.mm.1  | 0.4  | 0.052196 |
| TC0500001382.mm.1 | NM_025415          | Cks2    | CDC28 protein kinase regulatory subunit 2                                | 51645232  | 51650662  | TC1300000599.mm.1  | -0.2 | 0.052231 |
| TC0500001388.mm.1 | ENSMUST00000026901 | Rpl14-p | ribosomal protein L14, pseudogene 1                                      | 45324941  | 45325651  | TC0700000839.mm.1  | -0.8 | 0.052305 |
| TC0500001390.mm.1 | NM_009606          | Acta1   | actin, alpha 1, skeletal muscle                                          | 123891758 | 123894775 | TC0800003161.mm.1  | 0.1  | 0.052316 |
| TC0500001394.mm.1 | NM_008889          | Ppp1r14 | protein phosphatase 1, regulatory (inhibitor) subunit 14                 | 6975048   | 6977324   | TC190000127.mm.1   | -0.4 | 0.052318 |
| TC0500001396.mm.1 | NM_153119          | Plekho2 | pleckstrin homology domain containing, family C member 2                 | 65552577  | 65580087  | TC0900002514.mm.1  | 0.2  | 0.05238  |
| TC0500001403.mm.1 | NR_038097          | Gm11696 | predicted gene 11696                                                     | 109354778 | 109363654 | TC1100003988.mm.1  | -0.1 | 0.052384 |
| TC0500001405.mm.1 | NM_018869          | Grk5    | G protein-coupled receptor kinase 5                                      | 60889749  | 61092556  | TC1900000866.mm.1  | 0.4  | 0.052388 |
| TC0500001407.mm.1 | NM_001085543       | Gm14347 | predicted gene 14347                                                     | 4196576   | 4198535   | TC0X00000018.mm.1  | 0.2  | 0.052399 |
| TC0500001408.mm.1 | ENSMUST00000157653 | Gm23121 | predicted gene, 23121                                                    | 77579487  | 77579659  | TC0X00000776.mm.1  | 0.2  | 0.052401 |
| TC0500001414.mm.1 | NM_017374          | Ppp2cb  | protein phosphatase 2 (formerly 2A), catalytic subunit B                 | 33599621  | 33619804  | TC0800000392.mm.1  | -0.3 | 0.052449 |
| TC0500001416.mm.1 | NR_035500          | Mir1983 | microRNA 1983                                                            | 21896918  | 21897049  | TC1300001568.mm.1  | -0.2 | 0.052454 |
| TC0500001420.mm.1 | NM_010742          | Ly6d    | lymphocyte antigen 6 complex, locus D                                    | 74762056  | 74763567  | TC1500001718.mm.1  | -1.3 | 0.052478 |
| TC0500001425.mm.1 | NM_145625          | Eif4b   | eukaryotic translation initiation factor 4B                              | 102073773 | 102097173 | TC1500001085.mm.1  | -0.4 | 0.05248  |
| TC0500001428.mm.1 | ENSMUST00000095364 | Gm17686 | predicted gene, 17686                                                    | 114630680 | 114630973 | TC1200001293.mm.1  | -0.2 | 0.052572 |
| TC0500001437.mm.1 | ENSMUST00000120751 | Gm11556 | predicted gene 11556                                                     | 99839973  | 99840260  | TC1100003742.mm.1  | -0.2 | 0.05261  |
| TC0500001445.mm.1 | NM_207255          | Zfp532  | zinc finger protein 532                                                  | 65580230  | 65689443  | TC1800000677.mm.1  | 0.1  | 0.052627 |
| TC0500001447.mm.1 | NM_009770          | Btg3    | B cell translocation gene 3                                              | 78359860  | 78377192  | TC1600001939.mm.1  | -0.2 | 0.052641 |

|                   |                    |          |                                                                           |           |           |                    |      |          |
|-------------------|--------------------|----------|---------------------------------------------------------------------------|-----------|-----------|--------------------|------|----------|
| TC0500001489.mm.1 | NM_001011862       | OlfR699  | olfactory receptor 699                                                    | 106790049 | 106790999 | TC0700004018.mm.1  | 0.2  | 0.0527   |
| TC0500001490.mm.1 | NM_008250          | Hlx      | H2.0-like homeobox                                                        | 184727140 | 184732619 | TC0100003736.mm.1  | 0.1  | 0.052719 |
| TC0500001491.mm.1 | ENSMUST00000158195 | Gm25224  | predicted gene, 25224                                                     | 109689477 | 109689544 | TC1200001164.mm.1  | 0.1  | 0.052731 |
| TC0500001508.mm.1 | NM_018822          | Sgsh     | N-sulfoglucosamine sulfohydrolase (sulfamidase)                           | 119343425 | 119355536 | TC1100004183.mm.1  | 0.3  | 0.05275  |
| TC0500001512.mm.1 | ENSMUST00000119218 | Gm13231  | predicted gene 13231                                                      | 145641357 | 145644399 | TC0400001868.mm.1  | -0.2 | 0.052775 |
| TC0500001513.mm.1 | NM_177161          | P4ha3    | procollagen-proline, 2-oxoglutarate 4-dioxygenase                         | 100285520 | 100319699 | TC0700001404.mm.1  | -0.2 | 0.052873 |
| TC0500001514.mm.1 | ENSMUST00000179126 | Rps16-p  | ribosomal protein S16, pseudogene 3                                       | 10808730  | 10809170  | TC0800001687.mm.1  | -0.2 | 0.052891 |
| TC0500001516.mm.1 | NM_001039522       | Leo1     | Leo1, Paf1/RNA polymerase II complex component                            | 75441524  | 75466432  | TC0900001016.mm.1  | -0.3 | 0.052896 |
| TC0500001521.mm.1 | NM_145585          | Thumpd1  | THUMP domain containing 1                                                 | 119715093 | 119720798 | TC0700004188.mm.1  | -0.1 | 0.052908 |
| TC0500001526.mm.1 | NR_039541          | Mir3096  | microRNA 3096b                                                            | 23852201  | 23852291  | TC0500000200.mm.1  | -0.7 | 0.052908 |
| TC0500001527.mm.1 | NM_025626          | Fam107b  | family with sequence similarity 107, member B                             | 3613758   | 3782142   | TC0200000013.mm.1  | -0.2 | 0.052924 |
| TC0500001530.mm.1 | NM_153592          | Erlin2   | ER lipid raft associated 2                                                | 27023799  | 27039473  | TC0800000345.mm.1  | 0.3  | 0.052935 |
| TC0500001544.mm.1 | NM_010819          | Clec4d   | C-type lectin domain family 4, member d                                   | 123262107 | 123275268 | TC0600001404.mm.1  | 0.2  | 0.052937 |
| TC0500001554.mm.1 | ENSMUST00000118911 | Gm11687  | predicted gene 11687                                                      | 144142488 | 144143373 | TC0200004752.mm.1  | -0.3 | 0.052999 |
| TC0500001555.mm.1 | ENSMUST00000117963 | Ccnd3-p  | cyclin D3, pseudogene                                                     | 139345300 | 139346180 | TC0400003848.mm.1  | -0.7 | 0.053052 |
| TC0500001560.mm.1 | NM_020024          | Taf10    | TAF10 RNA polymerase II, TATA box binding protein                         | 105739393 | 105744361 | TC0700003989.mm.1  | -0.2 | 0.05318  |
| TC0500001569.mm.1 | NM_023517          | Tnfrsf13 | tumor necrosis factor (ligand) superfamily, member 13                     | 69682577  | 69696098  | TC1100003059.mm.1  | 0.2  | 0.053236 |
| TC0500001571.mm.1 | NM_028009          | Rpusd1   | RNA pseudouridylylase synthase domain containing                          | 25727751  | 25731464  | TC1700000383.mm.1  | -0.1 | 0.053277 |
| TC0500001573.mm.1 | ENSMUST00000158301 | Gm22687  | predicted gene, 22687                                                     | 166189697 | 166189801 | TC0200002562.mm.1  | 0.2  | 0.053374 |
| TC0500001575.mm.1 | NM_023907          | Foxl1    | forkhead box I1                                                           | 34204338  | 34208089  | TC1100002496.mm.1  | -0.2 | 0.053378 |
| TC0500001589.mm.1 | ENSMUST00000130431 |          | 4930570 RIKEN cDNA 4930570D08 gene                                        | 133898699 | 133901213 | TC0X00002984.mm.1  | 0.2  | 0.053379 |
| TC0500001590.mm.1 | NM_009439          | PsmD3    | proteasome (prosome, macropain) 26S subunit, predicted gene               | 98682554  | 98695979  | TC1100001578.mm.1  | -0.2 | 0.053462 |
| TC0500001598.mm.1 | NM_133747          | Fam98a   | family with sequence similarity 98, member A                              | 75537086  | 75551946  | TC1700002541.mm.1  | -0.2 | 0.053475 |
| TC0500001599.mm.1 | NM_025856          | Sh3d21   | SH3 domain containing 21                                                  | 126150602 | 126163491 | TC0400003529.mm.1  | 0.1  | 0.053538 |
| TC0500001610.mm.1 | NM_023060          | Eefsec   | eukaryotic elongation factor, selenocysteine-tRNA                         | 88257334  | 88446539  | TC0600002681.mm.1  | -0.4 | 0.053553 |
| TC0500001614.mm.1 | XM_003688881       | Gm8738   | predicted gene 8738                                                       | 103879523 | 103880243 | TC1100003883.mm.1  | 0.4  | 0.053563 |
| TC0500001615.mm.1 | NM_027354          | Poc1a    | POC1 centriolar protein homolog A (Chlamydomonas)                         | 106281061 | 106349891 | TC0900001344.mm.1  | -0.1 | 0.053651 |
| TC0500001623.mm.1 | NM_026883          | Fam216a  | family with sequence similarity 216, member A                             | 122364580 | 122372364 | TC0500003208.mm.1  | -0.2 | 0.053699 |
| TC0500001638.mm.1 | ENSMUST00000179984 | Gm2871   | predicted gene 2871                                                       | 3713109   | 3714312   | TC1400000012.mm.1  | -0.2 | 0.053711 |
| TC0500001642.mm.1 | ENSMUST00000168436 | Gm8323   | predicted gene 8323                                                       | 3479745   | 3480945   | TC1400001363.mm.1  | -0.2 | 0.053711 |
| TC0500001643.mm.1 | NM_133703          | Fam220a  | family with sequence similarity 220, member A                             | 143548706 | 143564531 | TC0500001735.mm.1  | 0.1  | 0.05374  |
| TC0500001645.mm.1 | ENSMUST00000054760 | Gm7075   | predicted gene 7075                                                       | 63421401  | 63421739  | TC1000002282.mm.1  | -0.4 | 0.053743 |
| TC0500001647.mm.1 | ENSMUST00000097415 | Gm11585  | predicted gene 11585                                                      | 102124046 | 102124657 | TC1100001680.mm.1  | -0.4 | 0.05375  |
| TC0500001648.mm.1 | ENSMUST00000122562 | Gm22481  | predicted gene, 22481                                                     | 22595029  | 22595220  | TC1600000318.mm.1  | 0.1  | 0.053875 |
| TC0500001655.mm.1 | ENSMUST00000175265 | Gm24157  | predicted gene, 24157                                                     | 52099043  | 52099153  | TC1100002710.mm.1  | -0.7 | 0.053954 |
| TC0500001658.mm.1 | NM_001163525       | S100a14  | S100 calcium binding protein A14                                          | 90526849  | 90528837  | TC0300000801.mm.1  | -0.3 | 0.053998 |
| TC0500001659.mm.1 | ENSMUST00000121792 | Gm13797  | predicted gene 13797                                                      | 95697917  | 95698036  | TC0200004188.mm.1  | -0.7 | 0.05402  |
| TC0500001662.mm.1 | ENSMUST00000121899 | Gm14830  | predicted gene 14830                                                      | 94774978  | 94775677  | TC0X00002653.mm.1  | -0.2 | 0.054028 |
| TC0500001663.mm.1 | NCBI_Gene:638605:p | Ighv2-5  | immunoglobulin heavy variable 2-5                                         | 113685482 | 113685915 | TC1200002561.mm.1  | -0.6 | 0.054031 |
| TC0500001667.mm.1 | ENSMUST00000120048 | Gm11485  | predicted gene 11485                                                      | 73422145  | 73423319  | TC0400002859.mm.1  | -0.2 | 0.054069 |
| TC0500001670.mm.1 | ENSMUST00000120534 | Gm12599  | predicted gene 12599                                                      | 11436984  | 11437775  | TC1100001299.mm.1  | -0.2 | 0.054119 |
| TC0500001676.mm.1 | ENSMUST00000173086 | Mrpl23-  | mitochondrial ribosomal protein L23, pseudogene                           | 74591330  | 74591917  | TC0200003773.mm.1  | -0.4 | 0.054133 |
| TC0500001689.mm.1 | NM_016904          | Cks1b    | CDC28 protein kinase 1b                                                   | 89415472  | 89418383  | TC0300002352.mm.1  | -0.2 | 0.054152 |
| TC0500001692.mm.1 | NM_001081212       | Irs2     | insulin receptor substrate 2                                              | 10986961  | 11008458  | TC0800001694.mm.1  | 0.2  | 0.054159 |
| TC0500001694.mm.1 | NM_025642          | Mis18a   | MIS18 kinetochore protein homolog A (S. pombe)                            | 90719312  | 90727404  | TC1600002055.mm.1  | -0.2 | 0.054168 |
| TC0500001695.mm.1 | ENSMUST00000121323 | Gm8199   | predicted gene 8199                                                       | 144232759 | 144233581 | TC0X00003120.mm.1  | -0.4 | 0.054335 |
| TC0500001696.mm.1 | XM_884324          | Gm13770  | predicted gene 13770                                                      | 91523573  | 91523884  | TC0200004121.mm.1  | 0.2  | 0.054418 |
| TC0500001716.mm.1 | BC116857           | Hist1h2  | histone cluster 1, H2bb                                                   | 23746734  | 23747241  | TC1300000259.mm.1  | -0.4 | 0.054435 |
| TC0500001724.mm.1 | NM_025384          | Dnajc15  | Dnaj (Hsp40) homolog, subfamily C, member 15                              | 77826217  | 77874917  | TC1400002464.mm.1  | -0.4 | 0.054489 |
| TC0500001732.mm.1 | ENSMUST00000117504 | Gm6580   | predicted gene 6580                                                       | 46027428  | 46028784  | TC1400000493.mm.1  | -0.2 | 0.054541 |
| TC0500001735.mm.1 | NM_0050001735      | Was      | Wiskott-Aldrich syndrome homolog (human)                                  | 8081453   | 8090498   | TC0X00001795.mm.1  | -0.3 | 0.054548 |
| TC0500001737.mm.1 | ENSMUST00000117677 | Gm13386  | predicted gene 13386                                                      | 28807708  | 28807831  | TC0200003237.mm.1  | -0.3 | 0.05456  |
| TC0500001744.mm.1 | ENSMUST00000158375 | Gm23853  | predicted gene, 23853                                                     | 111879304 | 111879407 | TC0800001339.mm.1  | 0.2  | 0.05457  |
| TC0500001758.mm.1 | ENSMUST00000158651 | Gm24545  | predicted gene, 24545                                                     | 59626580  | 59626664  | TC0100000453.mm.1  | 0.2  | 0.054694 |
| TC0500001767.mm.1 | NM_008147          | Gp49a    | glycoprotein 49 A                                                         | 51480632  | 51486316  | TC1000003213.mm.1  | 0.4  | 0.054713 |
| TC0500001771.mm.1 | NM_009878          | Cdkn2d   | cyclin-dependent kinase inhibitor 2D (p19, inhibitory)                    | 21288463  | 21291209  | TC0900001867.mm.1  | -0.4 | 0.054852 |
| TC0500001782.mm.1 | NM_172530          | She      | src homology 2 domain-containing transforming                             | 89831370  | 89858846  | TC0300000772.mm.1  | 0.1  | 0.054919 |
| TC0500001792.mm.1 | ENSMUST00000122020 | Gm8163   | predicted gene 8163                                                       | 60726389  | 60727448  | TC0X00002316.mm.1  | -0.2 | 0.054933 |
| TC0500001796.mm.1 | NCBI_Gene:10077517 | Ighv1-7  | immunoglobulin heavy variable 1-76                                        | 115847881 | 115848174 | TC1200002656.mm.1  | -1.2 | 0.054995 |
| TC0500001798.mm.1 | NM_010629          | Kifap3   | kinesin-associated protein 3                                              | 163779583 | 163917109 | TC0100001491.mm.1  | 0.2  | 0.055008 |
| TC0500001799.mm.1 | NM_133953          | Sf3b3    | splicing factor 3b, subunit 3                                             | 110810492 | 110846803 | TC0800002927.mm.1  | -0.4 | 0.055024 |
| TC0500001806.mm.1 | ENSMUST00000180045 | Chn1     | chimerin (chimaerin) 1                                                    | 73610660  | 73775346  | TC0200003759.mm.1  | 0.1  | 0.055035 |
| TC0500001818.mm.1 | ENSMUST00000119095 | Gm14016  | predicted gene 14016                                                      | 118594079 | 118594564 | TC0200001740.mm.1  | -0.3 | 0.055063 |
| TC0500001823.mm.1 | ENSMUST00000083381 | Gm26064  | predicted gene, 26064                                                     | 43425742  | 43425850  | TC1300001883.mm.1  | -0.2 | 0.055082 |
| TC0500001830.mm.1 | ENSMUST00000158254 | Gm25867  | predicted gene, 25867                                                     | 79635311  | 79635413  | TC1100003328.mm.1  | 0.2  | 0.05512  |
| TC0500001832.mm.1 | ENSMUST00000175344 | Gm24325  | predicted gene, 24325                                                     | 48420769  | 48420842  | TC0600000552.mm.1  | -0.2 | 0.055133 |
| TC0500001841.mm.1 | ENSMUST00000102409 | Gm24049  | predicted gene, 24049                                                     | 27401852  | 27401951  | TC0200000470.mm.1  | 0.2  | 0.055148 |
| TC0500001844.mm.1 | ENSMUST00000117106 | Gm15151  | predicted gene 15151                                                      | 151758017 | 151758193 | TC0X000003182.mm.1 | -0.5 | 0.055152 |
| TC0500001865.mm.1 | NM_008156          | Gpld1    | glycosylphosphatidylinositol specific phospholipase                       | 24943152  | 24991936  | TC1300000284.mm.1  | 0.1  | 0.05518  |
| TC0500001870.mm.1 | XM_001474959       | Gm2790   | predicted gene 2790                                                       | 31253762  | 31255381  | TC0X00000273.mm.1  | 0.1  | 0.055215 |
| TC0500001876.mm.1 | ENSMUST00000177607 | Gm23864  | predicted gene, 23864                                                     | 35699203  | 35699309  | TC1700001977.mm.1  | 0.2  | 0.055311 |
| TC0500001894.mm.1 | ENSMUST00000119030 | Gm12020  | predicted gene 12020                                                      | 18325630  | 18327671  | TC1100002258.mm.1  | -0.2 | 0.055403 |
| TC0500001896.mm.1 | NM_001161731       | Ang      | angiogenin, ribonuclease, RNase A family, 5                               | 51091077  | 51106151  | TC1400000578.mm.1  | 0.3  | 0.055509 |
| TC0500001901.mm.1 | NM_019817          | Copz1    | coatamer protein complex, subunit zeta 1                                  | 103272909 | 103299869 | TC1500001128.mm.1  | 0.2  | 0.055539 |
| TC0500001903.mm.1 | NM_001004157       | Scar1    | scavenger receptor class F, member 1                                      | 75513540  | 75526582  | TC1100001071.mm.1  | 0.2  | 0.055583 |
| TC0500001915.mm.1 | ENSMUST00000095028 | Gm13436  | predicted gene 13436                                                      | 36807808  | 36808425  | TC0200003384.mm.1  | -0.5 | 0.055642 |
| TC0500001916.mm.1 | NM_028199          | Plxdc1   | plexin domain containing 1                                                | 97923237  | 97986446  | TC1100003659.mm.1  | -0.3 | 0.055664 |
| TC0500001917.mm.1 | NM_009532          | Xrcc1    | X-ray repair complementing defective repair in Chinese hamster ovary cell | 24546295  | 24573438  | TC0700000387.mm.1  | -0.1 | 0.05567  |

|                   |                    |          |                                                 |           |           |                    |      |          |
|-------------------|--------------------|----------|-------------------------------------------------|-----------|-----------|--------------------|------|----------|
| TC0500001920.mm.1 | ENSMUST00000090731 | Tmx2     | thioredoxin-related transmembrane protein 2     | 87078263  | 87080230  | TC1700001309.mm.1  | 0.5  | 0.055714 |
| TC0500001924.mm.1 | NM_030686          | Dhrs4    | dehydrogenase/reductase (SDR family) member     | 55478758  | 55490340  | TC1400000777.mm.1  | 0.4  | 0.055814 |
| TC0500001928.mm.1 | ENSMUST00000170267 | Taar8c   | trace amine-associated receptor 8C              | 24100843  | 24101951  | TC1000001885.mm.1  | 0.3  | 0.055835 |
| TC0500001931.mm.1 | NM_027890          | Susd2    | sushi domain containing 2                       | 75636619  | 75644008  | TC1000002380.mm.1  | 0.4  | 0.056008 |
| TC0500001936.mm.1 | NM_027924          | Pdgfd    | platelet-derived growth factor, D polypeptide   | 6168612   | 6378846   | TC0900000035.mm.1  | 0.4  | 0.056046 |
| TC0500001938.mm.1 | ENSMUST00000103474 | Ighv7-1  | immunoglobulin heavy variable 7-1               | 113896410 | 113896946 | TC1200002574.mm.1  | -0.7 | 0.056175 |
| TC0500001947.mm.1 | NM_028031          | Zdhhc13  | zinc finger, DHHC domain containing 13          | 48789003  | 48827440  | TC0700000894.mm.1  | -0.3 | 0.056201 |
| TC0500001962.mm.1 | ENSMUST00000122073 | Gm12551  | predicted gene 12551                            | 86627075  | 86631251  | TC0400002979.mm.1  | 0.4  | 0.056226 |
| TC0500001963.mm.1 | ENSMUST00000174919 | Gm22403  | predicted gene, 22403                           | 61762386  | 61762469  | TC0200003621.mm.1  | 0.4  | 0.056265 |
| TC0500001968.mm.1 | NM_001025309       | Pja2     | praja 2, RING-H2 motif containing               | 64281005  | 64331916  | TC1700002400.mm.1  | 0.3  | 0.05628  |
| TC0500001972.mm.1 | NM_023113          | Aspa     | aspartoacylase                                  | 73304988  | 73329596  | TC1100003161.mm.1  | 0.4  | 0.056281 |
| TC0500001975.mm.1 | ENSMUST00000164544 | Gm3526   | predicted gene 3526                             | 5253907   | 5260580   | TC1400002837.mm.1  | 0.1  | 0.056348 |
| TC0500001984.mm.1 | NM_145462          | Haus4    | HAUS augmin-like complex, subunit 4             | 54541785  | 54554361  | TC1400002058.mm.1  | -0.2 | 0.056353 |
| TC0500001986.mm.1 | NCBI_Gene:780884:p | Ighv1-2  | immunoglobulin heavy variable V1-23             | 114764450 | 114764874 | TC1200002615.mm.1  | -0.9 | 0.056354 |
| TC0500001988.mm.1 | NM_001008421       | Nol10    | nucleolar protein 10                            | 17348458  | 17430095  | TC1200000140.mm.1  | -0.2 | 0.056432 |
| TC0500001991.mm.1 | NM_016923          | Ly96     | lymphocyte antigen 96                           | 16688456  | 16709605  | TC0100000103.mm.1  | 0.7  | 0.056541 |
| TC0500002020.mm.1 | ENSMUST00000184987 | adapt33  | Adaptive response 33 conserved region 3         | 100429101 | 100429238 | TC0500000978.mm.1  | -0.2 | 0.05659  |
| TC0500002021.mm.1 | NM_175313          | Eogt     | EGF domain-specific O-linked N-acetylglucosami  | 97110024  | 97149182  | TC06000002796.mm.1 | 0.2  | 0.056642 |
| TC0500002035.mm.1 | ENSMUST00000122676 | Gm25544  | predicted gene, 25544                           | 22902388  | 22902507  | TC0200000355.mm.1  | -0.2 | 0.056724 |
| TC0500002038.mm.1 | ENSMUST00000157913 | Gm23276  | predicted gene, 23276                           | 97336495  | 97336632  | TC1400002577.mm.1  | 0.2  | 0.056884 |
| TC0500002039.mm.1 | ENSMUST00000120677 | Gm12583  | predicted gene 12583                            | 37108174  | 37109026  | TC0300000275.mm.1  | -0.3 | 0.056918 |
| TC0500002043.mm.1 | NM_145437          | Cd300ld  | CD300 molecule-like family member d             | 114982274 | 114989922 | TC1100004053.mm.1  | 0.5  | 0.056977 |
| TC0500002056.mm.1 | NM_010324          | Got1     | glutamate oxaloacetate transaminase 1, soluble  | 43499752  | 43524605  | TC1900001541.mm.1  | -0.2 | 0.056994 |
| TC0500002062.mm.1 | NCBI_Gene:385047:p | Trav6d-  | T cell receptor alpha variable 6D-7             | 53007626  | 53008098  | TC1400002804.mm.1  | -0.7 | 0.056999 |
| TC0500002064.mm.1 | ENSMUST00000102274 | Gm25594  | predicted gene, 25594                           | 74910152  | 74910233  | TC1800001594.mm.1  | -0.3 | 0.057008 |
| TC0500002065.mm.1 | ENSMUST00000122035 | Mkrrn1-p | makorin, ring finger protein 1, pseudogene 1    | 88838009  | 88839402  | TC0500002716.mm.1  | -0.2 | 0.057135 |
| TC0500002077.mm.1 | NM_016813          | Nxf1     | nuclear RNA export factor 1                     | 8757073   | 8772475   | TC0900000156.mm.1  | -0.4 | 0.057237 |
| TC0500002079.mm.1 | ENSMUST00000117952 | Gm11427  | predicted gene 11427                            | 83254196  | 83260534  | TC1100001244.mm.1  | -0.3 | 0.057246 |
| TC0500002085.mm.1 | ENSMUST00000051371 | Gm11993  | predicted gene 11993                            | 9149778   | 9150597   | TC1100002215.mm.1  | -0.5 | 0.057266 |
| TC0500002086.mm.1 | ENSMUST00000119952 | Gm15836  | predicted gene 15836                            | 57435721  | 57436513  | TC1400002144.mm.1  | -0.2 | 0.057269 |
| TC0500002093.mm.1 | ENSMUST00000117213 | Gm13142  | predicted gene 13142                            | 147102327 | 147103981 | TC0400001896.mm.1  | 0.3  | 0.057344 |
| TC0500002099.mm.1 | NM_029614          | Prss23   | protease, serine, 23                            | 89507785  | 89527175  | TC0700003714.mm.1  | 0.2  | 0.057347 |
| TC0500002101.mm.1 | XM_885368          | Gm6195   | predicted pseudogene 6195                       | 9802103   | 9802553   | TC0100001945.mm.1  | -0.2 | 0.057379 |
| TC0500002114.mm.1 | ENSMUST00000122417 | Gm14117  | predicted gene 14117                            | 146305547 | 146306389 | TC0200002174.mm.1  | -0.1 | 0.057413 |
| TC0500002117.mm.1 | NM_017366          | Acadvl   | acyl-Coenzyme A dehydrogenase, very long chain  | 70010183  | 70015428  | TC1100003083.mm.1  | 0.4  | 0.057429 |
| TC0500002118.mm.1 | ENSMUST00000118764 | Gm13831  | predicted gene 13831                            | 115263093 | 115263394 | TC0500001252.mm.1  | -0.4 | 0.057476 |
| TC0500002126.mm.1 | NM_023131          | Rce1     | RCE1 homolog, prenyl protein peptidase (S. cere | 4622551   | 4625617   | TC1900000926.mm.1  | -0.2 | 0.057905 |
| TC0500002139.mm.1 | ENSMUST00000083049 | Gm25258  | predicted gene, 25258                           | 133584315 | 133584421 | TC0200004689.mm.1  | -0.8 | 0.057937 |
| TC0500002141.mm.1 | NM_026553          | Yif1a    | Yip1 interacting factor homolog A (S. cerevisia | 5088538   | 5092879   | TC1900000056.mm.1  | 0.2  | 0.057943 |
| TC0500002143.mm.1 | NM_009053          | Rfng     | RFNG O-fucosylpeptide 3-beta-N-acetylglucosarr  | 120780745 | 120784207 | TC1100004231.mm.1  | 0.2  | 0.057967 |
| TC0500002152.mm.1 | NM_001004149       | Zfp366   | zinc finger protein 366                         | 99184823  | 99247037  | TC1000001128.mm.1  | 0.2  | 0.058022 |
| TC0500002153.mm.1 | ENSMUST00000157752 | Gm25183  | predicted gene, 25183                           | 99133067  | 99133172  | TC1500002204.mm.1  | -0.2 | 0.058057 |
| TC0500002159.mm.1 | NM_001024385       | Crls1    | cardiolipin synthase 1                          | 132846666 | 132866785 | TC0200002044.mm.1  | 0.2  | 0.058088 |
| TC0500002167.mm.1 | NM_001193645       | Galns    | galactosamine (N-acetyl)-6-sulfate sulfatase    | 122578237 | 122611487 | TC0800003077.mm.1  | 0.2  | 0.058108 |
| TC0500002168.mm.1 | NM_134084          | Ppif     | peptidylprolyl isomerase F (cyclophilin F)      | 25694154  | 25700468  | TC1400000246.mm.1  | -0.2 | 0.058131 |
| TC0500002170.mm.1 | NM_133940          | Fbx14    | F-box and leucine-rich repeat protein 14        | 119479668 | 119483886 | TC0600001336.mm.1  | -0.3 | 0.058155 |
| TC0500002172.mm.1 | NM_178392          | Snappc1  | small nuclear RNA activating complex, polypepti | 73964530  | 73984820  | TC1200000655.mm.1  | -0.2 | 0.058221 |
| TC0500002178.mm.1 | NM_025313          | Atp5d    | ATP synthase, H+ transporting, mitochondrial F1 | 80141457  | 80145818  | TC1000003218.mm.1  | 0.4  | 0.058285 |
| TC0500002182.mm.1 | ENSMUST00000179933 | Gm25235  | predicted gene, 25235                           | 170832765 | 170832871 | TC0100003516.mm.1  | -0.2 | 0.05831  |
| TC0500002214.mm.1 | NM_172693          | Galnt12  | UDP-N-acetyl-alpha-D-galactosamine:polypeptid   | 47091909  | 47123070  | TC0400000514.mm.1  | -0.2 | 0.05834  |
| TC0500002218.mm.1 | NCBI_Gene:780891:p | Ighv1-3  | immunoglobulin heavy variable 1-39              | 114914599 | 114915032 | TC1200002623.mm.1  | -1.0 | 0.058362 |
| TC0500002221.mm.1 | XR_104643          | Gm10851  | predicted gene 10851                            | 11521707  | 11530836  | TC0200000219.mm.1  | 0.2  | 0.058373 |
| TC0500002223.mm.1 | ENSMUST00000077976 | Rps23-p  | ribosomal protein S23, pseudogene               | 37714717  | 37715212  | TC0300000291.mm.1  | -0.4 | 0.058452 |
| TC0500002234.mm.1 | NM_008694          | Ngp      | neutrophilic granule protein                    | 110419750 | 110423012 | TC0900001461.mm.1  | -0.2 | 0.058458 |
| TC0500002237.mm.1 | NM_172894          | Ppp6r1   | protein phosphatase 6, regulatory subunit 1     | 4631495   | 4658950   | TC0700002166.mm.1  | -0.5 | 0.058561 |
| TC0500002240.mm.1 | NM_138592          | Usp39    | ubiquitin specific peptidase 39                 | 72318676  | 72345184  | TC0600002484.mm.1  | -0.2 | 0.05868  |
| TC0500002242.mm.1 | NM_152817          | Ttc27    | tetratricopeptide repeat domain 27              | 74717750  | 74863570  | TC1700001163.mm.1  | -0.2 | 0.058699 |
| TC0500002244.mm.1 | NM_007719          | Ccr7     | chemokine (C-C motif) receptor 7                | 99144196  | 99155077  | TC1100003696.mm.1  | -0.6 | 0.058763 |
| TC0500002252.mm.1 | ENSMUST00000083412 | Gm25582  | predicted gene, 25582                           | 95624502  | 95624611  | TC0900001198.mm.1  | -0.3 | 0.058769 |
| TC0500002253.mm.1 | NCBI_Gene:243420:p | Igkv1-1  | immunoglobulin kappa variable 1-135             | 67609745  | 67610508  | TC0600003505.mm.1  | -1.4 | 0.058793 |
| TC0500002258.mm.1 | ENSMUST00000158087 | Gm22728  | predicted gene, 22728                           | 92056064  | 92056192  | TC0500002746.mm.1  | -0.2 | 0.058836 |
| TC0500002260.mm.1 | NM_026737          | Phf5a    | PHD finger protein 5A                           | 81864516  | 81871911  | TC1500001932.mm.1  | -0.2 | 0.058909 |
| TC0500002263.mm.1 | NM_022430          | Ms4a8a   | membrane-spanning 4-domains, subfamily A, m     | 11067471  | 11081103  | TC1900001124.mm.1  | 0.2  | 0.059017 |
| TC0500002265.mm.1 | NM_016714          | Nup50    | nucleoporin 50                                  | 84923401  | 84942963  | TC1500000797.mm.1  | -0.4 | 0.059104 |
| TC0500002266.mm.1 | NM_001011865       | Olfr624  | olfactory receptor 624                          | 103418755 | 103671029 | TC0700003889.mm.1  | 0.2  | 0.059144 |
| TC0500002268.mm.1 | NM_028667          | D3Ert7   | DNA segment, Chr 3, ERATO Doi 751, expressed    | 41742611  | 41759389  | TC0300000323.mm.1  | 0.1  | 0.059164 |
| TC0500002270.mm.1 | NM_001271409       | Sorbs3   | sorbin and SH3 domain containing 3              | 70180468  | 70211989  | TC1400002334.mm.1  | 0.2  | 0.059222 |
| TC0500002273.mm.1 | ENSMUST00000095471 | Rps2-ps  | ribosomal protein S2, pseudogene 6              | 76236648  | 76237353  | TC1400002441.mm.1  | -0.4 | 0.059256 |
| TC0500002274.mm.1 | NCBI_Gene:671652:p | Trav7-1  | Trav7-1 T cell receptor alpha variable 7-1      | 52654817  | 52655329  | TC1400000619.mm.1  | -0.4 | 0.059373 |
| TC0500002280.mm.1 | NM_201639          | Synn     | synemin, intermediate filament protein          | 67730161  | 67759742  | TC0700003451.mm.1  | -0.3 | 0.059402 |
| TC0500002286.mm.1 | NM_001289920       | E2f3     | E2F transcription factor 3 (E2f3), transcript v | 0         | 0         | TSUnmapped0000004  | -0.2 | 0.059505 |
| TC0500002288.mm.1 | ENSMUST00000183949 | MESTIT1  | MEST intronic transcript 1, antisense RNA conse | 30734418  | 30734647  | TC0600000278.mm.1  | 0.2  | 0.059563 |
| TC0500002289.mm.1 | NM_153795          | Fermt3   | fermitin family homolog 3 (Drosophila)          | 6998958   | 7019469   | TC1900001030.mm.1  | -0.5 | 0.059627 |
| TC0500002302.mm.1 | NM_010591          | Jun      | Jun oncogene                                    | 95049034  | 95052222  | TC0400003079.mm.1  | 0.3  | 0.05978  |
| TC0500002306.mm.1 | XM_001004356       | Gm8842   | predicted gene 8842                             | 107084507 | 107085388 | TC0600002872.mm.1  | -0.3 | 0.05986  |
| TC0500002318.mm.1 | NCBI_Gene:777686:p | Ighv2-2  | immunoglobulin heavy variable 2-2               | 113588267 | 113588700 | TC1200002555.mm.1  | -0.9 | 0.059883 |
| TC0500002319.mm.1 | NM_172883          | Mfsd7a   | major facilitator superfamily domain containing | 108441054 | 108448891 | TC0500002945.mm.1  | 0.2  | 0.059943 |
| TC0500002320.mm.1 | ENSMUST00000082748 | Gm25813  | predicted gene, 25813                           | 52336915  | 52337105  | TC0800002233.mm.1  | -1.0 | 0.060016 |

|                   |                    |          |                                                 |           |           |                    |      |          |
|-------------------|--------------------|----------|-------------------------------------------------|-----------|-----------|--------------------|------|----------|
| TC0500002325.mm.1 | ENSMUST00000082403 | mt-Ts1   | mitochondrially encoded tRNA serine 1           | 6870      | 6938      | TC0M000000025.mm.1 | 1.1  | 0.060036 |
| TC0500002328.mm.1 | ENSMUST00000117028 | Gm23334  | predicted gene, 23334                           | 34068931  | 34069054  | TC1900000492.mm.1  | 0.2  | 0.060038 |
| TC0500002343.mm.1 | NM_013610          | Ninj1    | ninjurin 1                                      | 49187485  | 49196251  | TC1300000560.mm.1  | 0.1  | 0.060076 |
| TC0500002386.mm.1 | ENSMUST00000169678 | Gm6576   | predicted gene 6576                             | 27025386  | 27026207  | TC1500000174.mm.1  | -0.6 | 0.06008  |
| TC0500002389.mm.1 | NM_025722          | 4921524  | RIKEN cDNA 4921524J17 gene                      | 85408759  | 85432841  | TC0800002612.mm.1  | -0.2 | 0.060159 |
| TC0500002411.mm.1 | OTTMUST00000090515 | RP23-28  | ---                                             | 69209762  | 69213098  | TC1000002338.mm.1  | 0.1  | 0.06025  |
| TC0500002416.mm.1 | NM_020003          | 610031   | RIKEN cDNA 0610031J06 gene                      | 88325023  | 88331313  | TC0300000722.mm.1  | 0.2  | 0.060259 |
| TC0500002428.mm.1 | NM_026107          | Zkscan6  | zinc finger with KRAB and SCAN domains 6        | 65807175  | 65829239  | TC1100000839.mm.1  | -0.1 | 0.060355 |
| TC0500002432.mm.1 | ENSMUST00000121800 | Gm8880   | predicted gene 8880                             | 88959217  | 88959670  | TC0X00000856.mm.1  | -0.5 | 0.060365 |
| TC0500002434.mm.1 | NM_001033158       | Ras12    | RAS-like, family 12                             | 65398488  | 65414853  | TC0900000842.mm.1  | 0.2  | 0.060487 |
| TC0500002435.mm.1 | NM_019712          | Rbx1     | ring-box 1                                      | 81466316  | 81476369  | TC1500000721.mm.1  | -0.1 | 0.060501 |
| TC0500002439.mm.1 | ENSMUST00000183778 | AC10275  | N/A                                             | 115172273 | 115172352 | TC0700001677.mm.1  | -1.0 | 0.060503 |
| TC0500002446.mm.1 | NCBI_Gene:243439:p | Igkv14-  | immunoglobulin kappa chain variable 14-100      | 68519012  | 68519477  | TC0600003521.mm.1  | -0.8 | 0.060506 |
| TC0500002450.mm.1 | NM_025449          | Nicn1    | nicotin 1                                       | 108290448 | 108296498 | TC0900001398.mm.1  | 0.3  | 0.060509 |
| TC0500002457.mm.1 | NCBI_Gene:791089:p | Ighv2-9  | immunoglobulin heavy variable 2-9-1             | 113769850 | 113770283 | TC1200002566.mm.1  | -0.8 | 0.060515 |
| TC0500002462.mm.1 | NM_001165930       | Glt8d1   | glycosyltransferase 8 domain containing 1       | 31001393  | 31012441  | TC1400000319.mm.1  | 0.2  | 0.060622 |
| TC0500002463.mm.1 | ENSMUST00000119431 | Gm14227  | predicted gene 14227                            | 155198632 | 155199260 | TC0200004956.mm.1  | -0.3 | 0.060654 |
| TC0500002464.mm.1 | NM_026301          | Rnf125   | ring finger protein 125                         | 20944625  | 20983848  | TC1800000160.mm.1  | 0.4  | 0.060672 |
| TC0500002465.mm.1 | NM_027879          | Cdc40    | cell division cycle 40                          | 40831621  | 40883143  | TC1000002046.mm.1  | -0.3 | 0.060736 |
| TC0500002480.mm.1 | NR_035493          | Mir1967  | microRNA 1967                                   | 124022641 | 124022722 | TC0800001542.mm.1  | -0.3 | 0.060772 |
| TC0500002483.mm.1 | ENSMUST00000117339 | Gm12626  | predicted gene 12626                            | 60631047  | 60633029  | TC1100002886.mm.1  | -0.2 | 0.060778 |
| TC0500002486.mm.1 | NM_011487          | Stat4    | signal transducer and activator of transcriptio | 51987148  | 52107188  | TC010000374.mm.1   | -0.5 | 0.060859 |
| TC0500002507.mm.1 | ENSMUST00000177586 | Gm5814   | predicted pseudogene 5814                       | 47410363  | 47410740  | TC1700000914.mm.1  | -0.2 | 0.060897 |
| TC0500002529.mm.1 | ENSMUST00000104692 | Gm24557  | predicted gene, 24557                           | 188519353 | 188519443 | TC0100003773.mm.1  | 0.6  | 0.060929 |
| TC0500002533.mm.1 | NM_023049          | Asb2     | ankyrin repeat and SOCS box-containing 2        | 103321142 | 103356001 | TC1200002263.mm.1  | -0.1 | 0.060933 |
| TC0500002548.mm.1 | NM_001039138       | Camk2g   | calcium/calmodulin-dependent protein kinase II  | 20734873  | 20794088  | TC1400001551.mm.1  | -0.4 | 0.060987 |
| TC0500002552.mm.1 | ENSMUST00000118924 | Gm14934  | predicted gene 14934                            | 96484859  | 96485479  | TC0X00000920.mm.1  | -0.7 | 0.060989 |
| TC0500002554.mm.1 | ENSMUST00000121014 | Vmn1r-p  | vomeronasal 1 receptor, pseudogene 111          | 22690970  | 22691966  | TC1300001598.mm.1  | 0.3  | 0.061032 |
| TC0500002555.mm.1 | ENSMUST00000157472 | Gm23671  | predicted gene, 23671                           | 82897397  | 82897499  | TC0X00002549.mm.1  | 0.1  | 0.061074 |
| TC0500002556.mm.1 | ENSMUST00000158455 | Gm24003  | predicted gene, 24003                           | 32913631  | 32913730  | TC0500000348.mm.1  | -0.1 | 0.061095 |
| TC0500002567.mm.1 | ENSMUST00000117186 | Gm5228   | predicted gene 5228                             | 47936090  | 47936446  | TC1700000927.mm.1  | -0.2 | 0.061135 |
| TC0500002571.mm.1 | NM_009696          | ApoE     | apolipoprotein E                                | 19699166  | 19699166  | TC0700002497.mm.1  | 0.5  | 0.061146 |
| TC0500002576.mm.1 | NM_001025575       | Cfhr2    | complement factor H-related 2                   | 139810292 | 140018921 | TC0100003191.mm.1  | 0.4  | 0.061157 |
| TC0500002578.mm.1 | ENSMUST00000104487 | Gm24469  | predicted gene, 24469                           | 18512515  | 18512645  | TC0800001792.mm.1  | 0.2  | 0.061185 |
| TC0500002583.mm.1 | NM_019772          | 1110004  | RIKEN cDNA 1110004F10 gene                      | 116093301 | 116105210 | TC0700001681.mm.1  | -0.2 | 0.061323 |
| TC0500002584.mm.1 | NM_181075          | 2610524  | RIKEN cDNA 2610524H06 gene                      | 114821935 | 114823468 | TC0200003735.mm.1  | -0.2 | 0.061377 |
| TC0500002593.mm.1 | ENSMUST00000116714 | Gm25777  | predicted gene, 25777                           | 18240717  | 18240842  | TC1600001309.mm.1  | -0.6 | 0.061388 |
| TC0500002608.mm.1 | NM_133993          | Pwp1     | PWP1 homolog (S. cerevisiae)                    | 85871831  | 85889103  | TC1000001038.mm.1  | -0.2 | 0.061408 |
| TC0500002620.mm.1 | NM_010227          | Flna     | filamin, alpha                                  | 74223461  | 74249820  | TC0X00002447.mm.1  | 0.3  | 0.061545 |
| TC0500002623.mm.1 | NM_018749          | Eif3d    | eukaryotic translation initiation factor 3, sub | 77958998  | 77970824  | TC1500001824.mm.1  | -0.3 | 0.06156  |
| TC0500002624.mm.1 | ENSMUST00000180333 | Gm14176  | predicted gene 14176                            | 157901469 | 157902522 | TC0200002417.mm.1  | -0.4 | 0.061664 |
| TC0500002627.mm.1 | NM_026382          | Snrnp48  | small nuclear ribonucleoprotein 48 (U11/U12)    | 38204939  | 38227663  | TC1300000443.mm.1  | -0.2 | 0.061673 |
| TC0500002628.mm.1 | NCBI_Gene:619994:p | Ighv1-7  | immunoglobulin heavy variable 1-77              | 115861867 | 115862160 | TC1200002657.mm.1  | -1.2 | 0.061688 |
| TC0500002642.mm.1 | NM_020012          | Rnf14    | ring finger protein 14                          | 38296635  | 38317849  | TC1800000396.mm.1  | 0.2  | 0.061704 |
| TC0500002651.mm.1 | ENSMUST00000077208 | LOC1000  | 40S ribosomal protein S26-like // ribosomal pr  | 107439176 | 107439585 | TC0800002879.mm.1  | -0.5 | 0.061753 |
| TC0500002656.mm.1 | ENSMUST00000183571 | CTS5303  | N/A                                             | 34770579  | 34770645  | TC1700001926.mm.1  | 0.2  | 0.061809 |
| TC0500002665.mm.1 | NM_009423          | Traf4    | TNF receptor associated factor 4                | 78158423  | 78165589  | TC1100003285.mm.1  | -0.2 | 0.061832 |
| TC0500002669.mm.1 | NM_029227          | Tomm20l  | translocase of outer mitochondrial membrane 2l  | 71111428  | 71123222  | TC1200000605.mm.1  | -0.1 | 0.061842 |
| TC0500002679.mm.1 | NM_025997          | Fam103a  | family with sequence similarity 103, member A1  | 81762925  | 81769491  | TC0700001177.mm.1  | -0.1 | 0.061863 |
| TC0500002688.mm.1 | NM_025768          | Grtp1    | GH regulated TBC protein 1                      | 13176869  | 13200624  | TC0800001728.mm.1  | 0.2  | 0.061886 |
| TC0500002689.mm.1 | NM_010240          | Ftl1     | ferritin light chain 1                          | 45457944  | 45459886  | TC0700003006.mm.1  | 0.4  | 0.062114 |
| TC0500002691.mm.1 | OTTMUST00000021432 | RP23-27  | ---                                             | 116200563 | 116200952 | TC0400003335.mm.1  | -0.3 | 0.062206 |
| TC0500002693.mm.1 | ENSMUST00000175562 | Gm23800  | predicted gene, 23800                           | 39007026  | 39007089  | TC1900001474.mm.1  | 0.2  | 0.062246 |
| TC0500002694.mm.1 | ENSMUST00000119405 | Gm13302  | predicted gene 13302                            | 41893388  | 41895236  | TC0400000387.mm.1  | 0.2  | 0.06236  |
| TC0500002696.mm.1 | ENSMUST00000118720 | Gm11599  | predicted gene 11599                            | 62660839  | 62661716  | TC0100000508.mm.1  | -0.3 | 0.062454 |
| TC0500002699.mm.1 | NCBI_Gene:634132:p | Trav7-2  | T cell receptor alpha variable 7-2              | 53390570  | 53391142  | TC1400000690.mm.1  | -0.3 | 0.062544 |
| TC0500002700.mm.1 | NR_028566          | Snord11  | small nucleolar RNA, C/D box 118                | 7478518   | 7478561   | TC1900000139.mm.1  | -0.2 | 0.062579 |
| TC0500002709.mm.1 | NM_178644          | Oaf      | OAF homolog (Drosophila)                        | 43221278  | 43239821  | TC0900002128.mm.1  | 0.2  | 0.062642 |
| TC0500002712.mm.1 | NM_030701          | Niacr1   | niacin receptor 1                               | 123863570 | 123865516 | TC0500003243.mm.1  | 0.2  | 0.062747 |
| TC0500002715.mm.1 | ENSMUST00000122207 | Gm12864  | predicted gene 12864                            | 118987014 | 118988019 | TC0400001324.mm.1  | 0.1  | 0.062753 |
| TC0500002716.mm.1 | ENSMUST00000171857 | Rpl10a-  | ribosomal protein L10A, pseudogene 1            | 64993924  | 64994631  | TC0100002472.mm.1  | -0.6 | 0.062783 |
| TC0500002717.mm.1 | NCBI_Gene:780793:p | Ighv2-7  | immunoglobulin heavy variable 2-7               | 113807314 | 113807747 | TC1200002569.mm.1  | -0.3 | 0.062864 |
| TC0500002732.mm.1 | NM_146767          | Olfrr110 | olfactory receptor 1104                         | 87021610  | 87022542  | TC0200003966.mm.1  | 0.2  | 0.062943 |
| TC0500002735.mm.1 | ENSMUST00000102076 | Gm22750  | predicted gene, 22750                           | 8921336   | 8921438   | TC1300001413.mm.1  | 0.2  | 0.062999 |
| TC0500002738.mm.1 | NM_001039951       | Zfp606   | zinc finger protein 606                         | 12478293  | 12496235  | TC0700000138.mm.1  | -0.1 | 0.063086 |
| TC0500002740.mm.1 | NM_026347          | Iah1     | isoamyl acetate-hydrolyzing esterase 1 homolog  | 21316389  | 21323607  | TC1200000183.mm.1  | 0.2  | 0.063142 |
| TC0500002744.mm.1 | NM_029005          | Mlkl     | mixed lineage kinase domain-like                | 111311797 | 111338177 | TC0800002947.mm.1  | 0.2  | 0.063146 |
| TC0500002746.mm.1 | NM_016763          | Hsd17b1  | hydroxysteroid (17-beta) dehydrogenase 10       | 152001845 | 152004442 | TC0X00001533.mm.1  | 0.2  | 0.063416 |
| TC0500002747.mm.1 | ENSMUST00000121776 | Gm14078  | predicted gene 14078                            | 140955765 | 140956249 | TC0200004734.mm.1  | 0.3  | 0.063494 |
| TC0500002749.mm.1 | ENSMUST00000082947 | Gm22265  | predicted gene, 22265                           | 192745571 | 192745686 | TC0100001865.mm.1  | -1.1 | 0.063524 |
| TC0500002754.mm.1 | NM_001254946       | BC03504  | cDNA sequence BC035044                          | 128848044 | 128891126 | TC0600003216.mm.1  | -0.3 | 0.063572 |
| TC0500002755.mm.1 | NM_138669          | Eif4a3   | eukaryotic translation initiation factor 4A3    | 119288363 | 119300089 | TC1100004182.mm.1  | -0.3 | 0.06363  |
| TC0500002760.mm.1 | ENSMUST00000082501 | Gm25588  | predicted gene, 25588                           | 153440079 | 153440218 | TC0100001378.mm.1  | -0.3 | 0.063636 |
| TC0500002775.mm.1 | NM_183250          | Tma7     | translational machinery associated 7 homolog (S | 109077988 | 109082381 | TC0900003074.mm.1  | -0.5 | 0.063646 |
| TC0500002777.mm.1 | ENSMUST00000157414 | Gm24994  | predicted gene, 24994                           | 78165546  | 78165666  | TC1200000697.mm.1  | 0.2  | 0.063848 |
| TC0500002812.mm.1 | NM_001081429       | Ccdc15   | coiled-coil domain containing 15                | 37275835  | 37348392  | TC0900002047.mm.1  | -0.2 | 0.063882 |
| TC0500002815.mm.1 | NR_028091          | Snord72  | small nucleolar RNA, C/D box 72                 | 5118404   | 5118484   | TC1500000020.mm.1  | -1.0 | 0.063929 |
| TC0500002825.mm.1 | NM_053129          | Pcdhb4   | protocadherin beta 4                            | 37307455  | 37311173  | TC1800000358.mm.1  | 0.2  | 0.064017 |

|                   |                    |         |                                                 |           |           |                   |      |          |
|-------------------|--------------------|---------|-------------------------------------------------|-----------|-----------|-------------------|------|----------|
| TC0500002836.mm.1 | NM_026904          | Anapc10 | anaphase promoting complex subunit 10           | 79711820  | 79777321  | TC0800000885.mm.1 | -0.2 | 0.06402  |
| TC0500002838.mm.1 | ENSMUST00000166589 | Gm17581 | predicted gene, 17581                           | 155735810 | 155735866 | TC0200004971.mm.1 | 0.2  | 0.064106 |
| TC0500002842.mm.1 | ENSMUST00000161562 | Gm5822  | predicted gene 5822                             | 2886330   | 28863707  | TC1900001332.mm.1 | -0.3 | 0.064161 |
| TC0500002843.mm.1 | ENSMUST00000104646 | Gm26052 | predicted gene, 26052                           | 113336553 | 113336641 | TC1100001856.mm.1 | 0.5  | 0.06417  |
| TC0500002856.mm.1 | NM_008220          | Hbb-bt  | hemoglobin, beta adult t chain                  | 103812524 | 103813996 | TC0700003908.mm.1 | 0.9  | 0.064183 |
| TC0500002875.mm.1 | ENSMUST00000175519 | Gm23415 | predicted gene, 23415                           | 10592484  | 10592566  | TC1300001435.mm.1 | 0.5  | 0.064296 |
| TC0500002879.mm.1 | NM_011526          | Tagln   | transgelin                                      | 45929628  | 45936058  | TC0900002212.mm.1 | 0.3  | 0.064316 |
| TC0500002885.mm.1 | NM_028725          | Sdr42e1 | short chain dehydrogenase/reductase family 42f  | 117661399 | 117673689 | TC0800003011.mm.1 | 0.1  | 0.064365 |
| TC0500002887.mm.1 | ENSMUST00000179958 | Gm25253 | predicted gene, 25253                           | 10555554  | 10555660  | TC0100001960.mm.1 | -0.2 | 0.064387 |
| TC0500002893.mm.1 | NM_001201391       | Hbb-bs  | hemoglobin, beta adult s chain                  | 103826523 | 103828096 | TC0700003909.mm.1 | 0.5  | 0.064394 |
| TC0500002895.mm.1 | NM_013834          | Sfrp1   | secreted frizzled-related protein 1             | 23411502  | 23449632  | TC0800000297.mm.1 | 0.4  | 0.064399 |
| TC0500002896.mm.1 | NM_026528          | 2700060 | RIKEN cDNA 2700060E02 gene                      | 19811402  | 19823823  | TC1400001523.mm.1 | -0.4 | 0.06459  |
| TC0500002904.mm.1 | ENSMUST00000122523 | n-R5s23 | nuclear encoded rRNA 5S 23                      | 24686168  | 24686282  | TC1800001085.mm.1 | 0.2  | 0.064643 |
| TC0500002906.mm.1 | NM_016767          | Batf    | basic leucine zipper transcription factor, ATF- | 85686669  | 85709087  | TC1200000838.mm.1 | -0.1 | 0.064758 |
| TC0500002908.mm.1 | ENSMUST00000120692 | Gm8545  | predicted gene 8545                             | 74006702  | 74007502  | TC0X00000699.mm.1 | -0.2 | 0.064771 |
| TC0500002910.mm.1 | NM_013532          | Lilrb4  | leukocyte immunoglobulin-like receptor, subfam  | 51490970  | 51496613  | TC1000003214.mm.1 | 0.6  | 0.064797 |
| TC0500002923.mm.1 | NM_172967          | 4930503 | RIKEN cDNA 4930503L19 gene                      | 70453140  | 70472480  | TC1800001539.mm.1 | -0.2 | 0.064904 |
| TC0500002926.mm.1 | ENSMUST00000165994 | Gm13241 | predicted gene 13241                            | 146475329 | 146476111 | TC0400001885.mm.1 | -0.1 | 0.064915 |
| TC0500002932.mm.1 | ENSMUST00000163646 | Gm5263  | predicted gene 5263                             | 146420434 | 146420874 | TC0100001329.mm.1 | -0.2 | 0.06493  |
| TC0500002936.mm.1 | ENSMUST00000158566 | Gm25770 | predicted gene, 25770                           | 137093612 | 137093726 | TC0X00003044.mm.1 | -0.1 | 0.06497  |
| TC0500002945.mm.1 | ENSMUST00000122024 | Gm11581 | predicted gene 11581                            | 60809116  | 60809942  | TC0100000482.mm.1 | 0.2  | 0.064988 |
| TC0500002947.mm.1 | ENSMUST00000121667 | Gm6039  | predicted gene 6039                             | 75233063  | 75234312  | TC0X00000740.mm.1 | -0.2 | 0.065116 |
| TC0500002961.mm.1 | ENSMUST00000083096 | n-R5s16 | nuclear encoded rRNA 5S 160                     | 12742899  | 12743018  | TC0600000089.mm.1 | 0.1  | 0.065155 |
| TC0500002971.mm.1 | ENSMUST00000157780 | Gm25886 | predicted gene, 25886                           | 89393076  | 89393189  | TC1400001134.mm.1 | -0.1 | 0.065254 |
| TC0500002974.mm.1 | NM_178650          | Tbc1d10 | TBC1 domain family, member 10c                  | 4184357   | 4191047   | TC1900000907.mm.1 | -0.4 | 0.065263 |
| TC0500002982.mm.1 | ENSMUST00000158129 | Gm24905 | predicted gene, 24905                           | 34916250  | 34916353  | TC0200000628.mm.1 | 0.1  | 0.065347 |
| TC0500002985.mm.1 | NM_001024474       | Diras2  | DIRAS family, GTP-binding RAS-like 2            | 52504375  | 52530836  | TC1300002006.mm.1 | -0.2 | 0.065355 |
| TC0500002989.mm.1 | ENSMUST00000165508 | Gm8340  | predicted gene 8340                             | 6358497   | 6359687   | TC1400000061.mm.1 | -0.2 | 0.06541  |
| TC0500002993.mm.1 | ENSMUST00000177317 | Gm25591 | predicted gene, 25591                           | 108428067 | 108428160 | TC1000001273.mm.1 | -0.4 | 0.065479 |
| TC0500002996.mm.1 | NM_178184          | Hist1h2 | histone cluster 1, H2an                         | 21786826  | 21787218  | TC1300001562.mm.1 | -0.9 | 0.065487 |
| TC0500003001.mm.1 | NM_009705          | Arg2    | arginase type II                                | 79130777  | 79156301  | TC1200000715.mm.1 | -0.1 | 0.065568 |
| TC0500003004.mm.1 | ENSMUST00000117514 | Gm7856  | predicted gene 7856                             | 91513141  | 91514633  | TC1600002077.mm.1 | -0.2 | 0.065577 |
| TC0500003047.mm.1 | ENSMUST00000175168 | Gm25732 | predicted gene, 25732                           | 139338206 | 139338265 | TC0400001745.mm.1 | -0.5 | 0.065592 |
| TC0500003048.mm.1 | NM_001146196       | Scin    | scinderin                                       | 40059769  | 40134228  | TC1200001660.mm.1 | -0.2 | 0.065664 |
| TC0500003053.mm.1 | ENSMUST00000169322 | Gm17404 | predicted gene, 17404                           | 66851343  | 66851513  | TC1300002233.mm.1 | -0.2 | 0.065714 |
| TC0500003058.mm.1 | NR_002865          | Rnu11   | U11 small nuclear RNA                           | 132270079 | 132270213 | TC0400003664.mm.1 | -0.9 | 0.065716 |
| TC0500003060.mm.1 | NCBI_Gene:692165:p | Igkv10- | immunoglobulin kappa variable 10-96             | 68631950  | 68704996  | TC0600003544.mm.1 | -1.1 | 0.065847 |
| TC0500003061.mm.1 | ENSMUST00000118476 | Gm12220 | predicted gene 12220                            | 53929305  | 53929476  | TC1100002750.mm.1 | 0.5  | 0.065911 |
| TC0500003063.mm.1 | ENSMUST00000158108 | Gm23895 | predicted gene, 23895                           | 78648128  | 78648287  | TC1800000841.mm.1 | 0.2  | 0.066103 |
| TC0500003064.mm.1 | NM_029998          | 6030458 | RIKEN cDNA 6030458C11 gene                      | 12808177  | 12824657  | TC1500001234.mm.1 | -0.1 | 0.066132 |
| TC0500003072.mm.1 | XR_141229          | BC00551 | cDNA sequence BC005512                          | 114094905 | 114106953 | TC1400002697.mm.1 | 0.2  | 0.066189 |
| TC0500003085.mm.1 | NM_175646          | Txn14b  | thioredoxin-like 4B                             | 109565892 | 109574051 | TC0800001297.mm.1 | 0.2  | 0.066204 |
| TC0500003086.mm.1 | NM_021542          | Kcnk5   | potassium channel, subfamily K, member 5        | 20140057  | 20181784  | TC1400001528.mm.1 | -0.2 | 0.06633  |
| TC0500003088.mm.1 | XM_001472641       | Gm6158  | predicted gene 6158                             | 24069924  | 24070637  | TC1400000218.mm.1 | -0.6 | 0.066442 |
| TC0500003089.mm.1 | ENSMUST00000059524 | LOC1010 | adenosylhomocysteinase-like // S-adenosylhom    | 46152997  | 46155077  | TC1600001677.mm.1 | -0.3 | 0.066454 |
| TC0500003094.mm.1 | ENSMUST00000182353 | Gm5597  | predicted gene 5597                             | 76244746  | 76245938  | TC0700003536.mm.1 | -0.3 | 0.066485 |
| TC0500003110.mm.1 | NM_001099217       | Ly6c2   | lymphocyte antigen 6 complex, locus C2          | 75108160  | 75111949  | TC1500001730.mm.1 | 0.6  | 0.066517 |
| TC0500003126.mm.1 | NM_133238          | Cd209a  | CD209a antigen                                  | 3743395   | 3748984   | TC0800001619.mm.1 | 0.2  | 0.066522 |
| TC0500003133.mm.1 | NM_010261          | Rabac1  | Rab acceptor 1 (prenylated)                     | 24969750  | 24972728  | TC0700002615.mm.1 | 0.3  | 0.066528 |
| TC0500003136.mm.1 | NM_011840          | Map2k5  | mitogen-activated protein kinase kinase 5       | 63163768  | 63377902  | TC0900002472.mm.1 | -0.2 | 0.066543 |
| TC0500003138.mm.1 | NM_153583          | Atg4d   | autophagy related 4D, cysteine peptidase        | 21265285  | 21274837  | TC0900000191.mm.1 | -0.1 | 0.066718 |
| TC0500003168.mm.1 | NM_183175          | C1qtnf9 | C1q and tumor necrosis factor related protein 9 | 60768134  | 60780869  | TC1400000853.mm.1 | 0.4  | 0.066792 |
| TC0500003179.mm.1 | ENSMUST00000077435 | Gm6807  | predicted gene 6807                             | 45450308  | 45451195  | TC1900001581.mm.1 | -0.6 | 0.067118 |
| TC0500003180.mm.1 | ENSMUST00000071101 | Gm10010 | predicted gene 10010                            | 128187818 | 128200623 | TC0600003194.mm.1 | 0.1  | 0.067181 |
| TC0500003181.mm.1 | NM_001007460       | Zdhc23  | zinc finger, DHHC domain containing 23          | 43969078  | 43979788  | TC1600001638.mm.1 | -0.1 | 0.067232 |
| TC0500003188.mm.1 | NCBI_Gene:434031:p | Igkv10- | immunoglobulin kappa variable 10-95             | 68680379  | 68680848  | TC0600000800.mm.1 | -1.0 | 0.067254 |
| TC0500003189.mm.1 | NM_146103          | Tmem185 | transmembrane protein 185B                      | 119526154 | 119528983 | TC0100001076.mm.1 | -0.1 | 0.06731  |
| TC0500003193.mm.1 | NM_175036          | Leprot  | leptin receptor overlapping transcript          | 101647718 | 101659364 | TC0400001038.mm.1 | 0.2  | 0.067322 |
| TC0500003194.mm.1 | ENSMUST00000103503 | Ighv1-3 | immunoglobulin heavy variable 1-30              | 114817099 | 114817390 | TC1200002618.mm.1 | -1.1 | 0.067375 |
| TC0500003195.mm.1 | NM_009164          | Sh3bp1  | SH3-domain binding protein 1                    | 78899768  | 78912052  | TC1200002333.mm.1 | -0.2 | 0.067428 |
| TC0500003198.mm.1 | NM_177700          | Atmin   | ATM interactor                                  | 116943393 | 116960445 | TC0800001392.mm.1 | -0.3 | 0.067502 |
| TC0500003208.mm.1 | NM_025281          | Lyar    | Ly1 antibody reactive clone                     | 38220470  | 38234306  | TC0500000434.mm.1 | -0.2 | 0.06752  |
| TC0500003218.mm.1 | NM_172707          | Ppp1cb  | protein phosphatase 1, catalytic subunit, beta  | 32458970  | 32517433  | TC0500000339.mm.1 | -0.2 | 0.06753  |
| TC0500003220.mm.1 | NM_028077          | 1810055 | RIKEN cDNA 1810055G02 gene                      | 3708333   | 3717881   | TC1900000015.mm.1 | 0.1  | 0.06762  |
| TC0500003225.mm.1 | NCBI_Gene:213570:p | Ighv1-7 | immunoglobulin heavy variable 1-78              | 115868773 | 115869066 | TC1200002658.mm.1 | -0.9 | 0.067624 |
| TC0500003229.mm.1 | NM_177628          | Fam167a | family with sequence similarity 167, member A   | 63436394  | 63465502  | TC1400000899.mm.1 | -0.1 | 0.067684 |
| TC0500003236.mm.1 | NM_009858          | Cd8b1   | CD8 antigen, beta chain 1                       | 71322812  | 71337477  | TC0600000826.mm.1 | -1.7 | 0.067701 |
| TC0500003240.mm.1 | XM_888439          | Gm6462  | predicted gene 6462                             | 28938035  | 28938340  | TC0100000184.mm.1 | -0.4 | 0.067744 |
| TC0500003243.mm.1 | NM_001110517       | Gm14446 | predicted gene 14446                            | 34592888  | 34662419  | TC1900001422.mm.1 | -0.2 | 0.067831 |
| TC0500003244.mm.1 | ENSMUST00000122405 | Gm13602 | predicted gene 13602                            | 66942558  | 66943050  | TC0900000964.mm.1 | -0.3 | 0.067841 |
| TC0500003247.mm.1 | NCBI_Gene:382180:p | Trav7d- | T cell receptor alpha variable 7D-4             | 52769753  | 52770392  | TC1400000626.mm.1 | -0.5 | 0.067843 |
| TC0500003253.mm.1 | NM_009632          | Parp2   | poly (ADP-ribose) polymerase family, member 2   | 50807946  | 50821300  | TC1400000569.mm.1 | -0.2 | 0.067891 |
| TC0500003256.mm.1 | ENSMUST00000099961 | Gm6043  | predicted gene 6043                             | 29217639  | 29218130  | TC1400000293.mm.1 | -0.2 | 0.067939 |
| TC0500003258.mm.1 | NM_033526          | Ubqln4  | ubiquilin 4                                     | 88553716  | 88569725  | TC0300000730.mm.1 | 0.1  | 0.06798  |
| TC0500003261.mm.1 | NM_019676          | Plcd1   | phospholipase C, delta 1                        | 119071527 | 119093496 | TC0900003233.mm.1 | 0.2  | 0.067987 |
| TC0500003264.mm.1 | ENSMUST00000105805 | Gm13030 | predicted gene 13030                            | 138870992 | 138873964 | TC0400003834.mm.1 | 0.1  | 0.067991 |
| TC0500003273.mm.1 | ENSMUST00000104029 | Gm23951 | predicted gene, 23951                           | 83366870  | 83367001  | TC1100003392.mm.1 | 0.2  | 0.067998 |
| TC0500003274.mm.1 | ENSMUST00000083119 | Gm25705 | predicted gene, 25705                           | 31174909  | 31175012  | TC0400002350.mm.1 | 0.2  | 0.068077 |

|                   |                    |         |                                                   |           |           |                   |      |          |
|-------------------|--------------------|---------|---------------------------------------------------|-----------|-----------|-------------------|------|----------|
| TC0500003277.mm.1 | NCBI_Gene:436467:p | Trav14- | Trav14-1 T cell receptor alpha variable 14-1      | 53554022  | 53554749  | TC1400002829.mm.1 | -0.4 | 0.068103 |
| TC0500003279.mm.1 | ENSMUST00000105060 | Gm14188 | predicted gene 14188                              | 99763933  | 99764100  | TC1100003734.mm.1 | -0.4 | 0.068115 |
| TC0500003284.mm.1 | ENSMUST00000157085 | Gm22235 | predicted gene, 22235                             | 86703298  | 86703407  | TC1700002674.mm.1 | 0.2  | 0.068181 |
| TC0500003300.mm.1 | NM_001007575       | Zfp58   | zinc finger protein 58                            | 67490167  | 67500555  | TC1300002775.mm.1 | -0.2 | 0.068181 |
| TC0500003304.mm.1 | NCBI_Gene:380824:p | Ighv1-6 | immunoglobulin heavy variable 1-66                | 115593110 | 115593543 | TC1200002644.mm.1 | -1.0 | 0.068183 |
| TC0500003305.mm.1 | BC115617           | Ddrgk1  | DDRKG domain containing 1                         | 130653960 | 130664659 | TC0200004634.mm.1 | 0.1  | 0.068226 |
| TC0500003316.mm.1 | XM_487135          | Gm5174  | predicted gene 5174                               | 86655939  | 86657411  | TC1000001048.mm.1 | 0.2  | 0.068257 |
| TC0500003318.mm.1 | NM_001112700       | Cyth1   | cytohesin 1                                       | 118132019 | 118248592 | TC1100004152.mm.1 | -0.2 | 0.068306 |
| TC0500003371.mm.1 | NM_027892          | Ppp1r12 | protein phosphatase 1, regulatory (inhibitor) s   | 108162193 | 108277575 | TC1000001266.mm.1 | -0.2 | 0.068321 |
| TC0500003373.mm.1 | ENSMUST00000082684 | n-R5s95 | nuclear encoded rRNA 5S 95                        | 9568132   | 9568249   | TC0800001674.mm.1 | 0.2  | 0.068326 |
| TC0500003376.mm.1 | NM_029638          | Abp1    | amiloride binding protein 1 (amine oxidase, cop   | 48895254  | 48909188  | TC0600000572.mm.1 | -0.1 | 0.068363 |
| TC0500003378.mm.1 | NR_002172          | Snord15 | small nucleolar RNA, C/D box 15A                  | 99482785  | 99482932  | TC0700003799.mm.1 | -1.3 | 0.068377 |
| TC0500003384.mm.1 | NM_001163378       | 2700049 | RIKEN cDNA 2700049A03 gene                        | 71136848  | 71243303  | TC1200000606.mm.1 | -0.2 | 0.068397 |
| TC0500003389.mm.1 | ENSMUST00000175498 | Gm24106 | predicted gene, 24106                             | 64225523  | 64225649  | TC0900000817.mm.1 | 0.2  | 0.068398 |
| TC0500003390.mm.1 | NM_144835          | Heatr1  | HEAT repeat containing 1                          | 12395375  | 12440289  | TC1300000070.mm.1 | -0.2 | 0.068469 |
| TC0500003391.mm.1 | NM_025666          | Ubr7    | ubiquitin protein ligase E3 component n-recogni   | 102757975 | 102777707 | TC1200001021.mm.1 | -0.2 | 0.068491 |
| TC0500003399.mm.1 | NM_027455          | Qpct    | glutaminyln-peptide cyclotransferase (glutaminyln | 79051906  | 79090353  | TC1700001194.mm.1 | 0.2  | 0.068603 |
| TC0500003401.mm.1 | XR_140488          | Gm10855 | predicted gene 10855                              | 6932541   | 6935081   | TC0200002911.mm.1 | 0.2  | 0.068625 |
| TC0500003404.mm.1 | NM_001033178       | Tmem181 | transmembrane protein 181A                        | 6270470   | 6308314   | TC1700000055.mm.1 | 0.2  | 0.068635 |
| TC0500003407.mm.1 | NM_009144          | Sfrp2   | secreted frizzled-related protein 2               | 83766321  | 83774316  | TC0300000647.mm.1 | 0.2  | 0.068701 |
| TC0500003412.mm.1 | NM_021345          | Ptplad1 | protein tyrosine phosphatase-like A domain cont   | 64986983  | 65021717  | TC0900002503.mm.1 | -0.2 | 0.068771 |
| TC0500003415.mm.1 | ENSMUST00000120561 | Gm12991 | predicted gene 12991                              | 135377158 | 135377235 | TC0400001655.mm.1 | -0.3 | 0.068958 |
| TC0500003417.mm.1 | NM_001198839       | Bcar1   | breast cancer anti-estrogen resistance 1          | 111710474 | 111743849 | TC0800002953.mm.1 | 0.1  | 0.068972 |
| TC0500003420.mm.1 | BC119090           | Plp2    | proteolipid protein 2                             | 7667941   | 7671390   | TC0X00001780.mm.1 | 0.3  | 0.069002 |
| TC0500003429.mm.1 | NM_173424          | Zbtb37  | zinc finger and BTB domain containing 37          | 161008794 | 161034849 | TC0100003370.mm.1 | 0.1  | 0.069006 |
| TC0500003430.mm.1 | NM_010423          | Hey1    | hairly/enhancer-of-split related with YRPW motif  | 8663359   | 8667039   | TC0300001616.mm.1 | -0.4 | 0.069048 |
| TC0500003431.mm.1 | ENSMUST00000079706 | Gm5417  | predicted gene 5417                               | 83405612  | 83406105  | TC1500001975.mm.1 | 0.2  | 0.069058 |
| TC0500003439.mm.1 | NM_019410          | Pfn2    | profilin 2                                        | 57841895  | 57847757  | TC0300002035.mm.1 | -0.1 | 0.069072 |
| TC0500003441.mm.1 | BC094644           | Rpl38   | ribosomal protein L38                             | 114668524 | 114672331 | TC1100001874.mm.1 | -0.3 | 0.069076 |
| TC0500003448.mm.1 | NM_001083320       | Magi1   | membrane associated guanylate kinase, WW an       | 93675453  | 94283917  | TC0600002763.mm.1 | 0.2  | 0.069088 |
| TC0500003451.mm.1 | NM_183027          | Ap1s3   | adaptor-related protein complex AP-1, sigma 3     | 79606876  | 79671972  | TC0100002642.mm.1 | -0.2 | 0.069123 |
| TC0500003460.mm.1 | NM_001252458       | Prkd2   | protein kinase D2                                 | 16842902  | 16870461  | TC0700000239.mm.1 | -0.7 | 0.06913  |
| TC0500003463.mm.1 | NM_028982          | 8430419 | RIKEN cDNA 8430419L09 gene                        | 135197977 | 135244955 | TC0600001605.mm.1 | -0.2 | 0.069198 |
| TC0500003464.mm.1 | NM_011380          | Six2    | sine oculis-related homeobox 2                    | 85684268  | 85688274  | TC1700002662.mm.1 | -0.1 | 0.069253 |
| TC0500003465.mm.1 | NCBI_Gene:668549:p | Ighv1-6 | Ighv1-62-3 immunoglobulin heavy variable 1-62-    | 115460999 | 115461431 | TC1200002641.mm.1 | -1.0 | 0.069258 |
| TC0500003474.mm.1 | ENSMUST00000118988 | Gm5385  | predicted gene 5385                               | 41248575  | 41250133  | TC0X00000386.mm.1 | 0.1  | 0.069308 |
| TC0500003476.mm.1 | NM_177030          | Dock6   | dedicator of cytokinesis 6                        | 21800180  | 21852635  | TC0900001885.mm.1 | 0.1  | 0.069339 |
| TC0500003479.mm.1 | ENSMUST00000122140 | Gm9575  | predicted gene 9575                               | 50665008  | 50666346  | TC1600001712.mm.1 | -0.3 | 0.06937  |
| TC0500003490.mm.1 | ENSMUST00000116949 | Gm24640 | predicted gene, 24640                             | 10489971  | 10490096  | TC0200000141.mm.1 | -0.1 | 0.069469 |
| TC0500003497.mm.1 | ENSMUST00000116990 | Gm22626 | predicted gene, 22626                             | 10497352  | 10497477  | TC0200000159.mm.1 | -0.1 | 0.069469 |
| TC0500003506.mm.1 | NM_153554          | Aldh18a | aldehyde dehydrogenase 18 family, member A1       | 40550257  | 40588463  | TC0900001490.mm.1 | -0.2 | 0.069494 |
| TC0500003507.mm.1 | ENSMUST00000158431 | Gm23016 | predicted gene, 23016                             | 64728066  | 64728127  | TC1800000664.mm.1 | 0.2  | 0.069516 |
| TC0500003509.mm.1 | NM_172748          | Fbxl19  | F-box and leucine-rich repeat protein 19          | 127746775 | 127768928 | TC0700001861.mm.1 | -0.1 | 0.069542 |
| TC0500003516.mm.1 | ENSMUST00000126680 | Gm5834  | predicted pseudogene 5834                         | 139939601 | 139994205 | TC0100003192.mm.1 | 0.4  | 0.06967  |
| TC0500003518.mm.1 | NM_206816          | Olfr128 | olfactory receptor 128                            | 37923516  | 37924555  | TC1700000790.mm.1 | 0.2  | 0.069684 |
| TC0500003521.mm.1 | NM_024173          | Atp6v1g | ATPase, H+ transporting, lysosomal V1 subunit G   | 63544765  | 63550750  | TC0400000725.mm.1 | -0.1 | 0.069706 |
| TC0500003524.mm.1 | NM_009009          | Rad21   | RAD21 homolog (S. pombe)                          | 51962604  | 51991760  | TC1500001506.mm.1 | -0.6 | 0.06971  |
| TC0500003535.mm.1 | NM_138589          | Ubfd1   | ubiquitin family domain containing 1              | 122067175 | 122082199 | TC0700001749.mm.1 | -0.1 | 0.069731 |
| TC0500003538.mm.1 | NM_016674          | Cldn1   | claudin 1                                         | 26356642  | 26371841  | TC1600001419.mm.1 | -0.3 | 0.069762 |
| TC0500003549.mm.1 | NCBI_Gene:674098:p | Trav8-1 | T cell receptor alpha variable 8-1                | 53469756  | 53470231  | TC1400000695.mm.1 | -0.3 | 0.069787 |
| TC0500003566.mm.1 | NM_016847          | Avpr1a  | arginine vasopressin receptor 1A                  | 122448499 | 122453453 | TC1000001506.mm.1 | 0.3  | 0.069799 |
| TC0500003568.mm.1 | ENSMUST00000164855 | A730015 | RIKEN cDNA A730015C16 gene                        | 108847399 | 108848619 | TC0400003256.mm.1 | -0.2 | 0.069915 |
| TC0500003576.mm.1 | ENSMUST00000083414 | Gm25577 | predicted gene, 25577                             | 118504928 | 118505034 | TC1200002508.mm.1 | -0.8 | 0.069978 |
| TC0500003581.mm.1 | NM_029720          | Crelid2 | cysteine-rich with EGF-like domains 2             | 88819646  | 88826683  | TC1500000852.mm.1 | -0.3 | 0.07     |
| TC0500003585.mm.1 | NM_011804          | Creg1   | cellular repressor of E1A-stimulated genes 1      | 165763746 | 165775308 | TC0100001526.mm.1 | 0.4  | 0.070012 |
| TC0500003590.mm.1 | NR_029800          | Mir219- | microRNA 219-1                                    | 34024966  | 34025092  | TC1700001894.mm.1 | -0.3 | 0.070094 |
| TC0500003592.mm.1 | NM_020623          | Pth     | parathyroid hormone                               | 113385576 | 113388573 | TC0700004128.mm.1 | -0.5 | 0.070177 |
| TC0500003599.mm.1 | NM_011095          | Lilrb3  | leukocyte immunoglobulin-like receptor, subfam    | 3711409   | 3720391   | TC0700004631.mm.1 | 0.2  | 0.070237 |
| TC0500003615.mm.1 | ENSMUST00000122492 | Gm26255 | predicted gene, 26255                             | 110732036 | 110732138 | TC1400001232.mm.1 | 0.3  | 0.070252 |
| TC0500003617.mm.1 | ENSMUST00000119332 | Gm13604 | predicted gene 13604                              | 67707290  | 67707771  | TC0200003688.mm.1 | -0.5 | 0.070355 |
| TC0500003621.mm.1 | XM_001476757       | Gm10144 | predicted pseudogene 10144                        | 65600067  | 65600273  | TC0900002515.mm.1 | -0.2 | 0.070366 |
| TC0500003635.mm.1 | ENSMUST00000122782 | Gm25806 | predicted gene, 25806                             | 83690004  | 83690125  | TC0500002669.mm.1 | 0.2  | 0.070517 |
| TC0500003638.mm.1 | ENSMUST00000158207 | Gm23543 | predicted gene, 23543                             | 65864171  | 65864276  | TC0600002409.mm.1 | 0.1  | 0.070591 |
| TC0500003643.mm.1 | NM_001177902       | Zfp518b | zinc finger protein 518B                          | 38668484  | 38684826  | TC0500002288.mm.1 | 0.1  | 0.070602 |
| TC0500003651.mm.1 | ENSMUST00000132939 | Gm9013  | predicted gene 9013                               | 60039610  | 60040491  | TC1400002170.mm.1 | -0.5 | 0.070681 |
| TC0500003655.mm.1 | NM_008910          | Ppm1a   | protein phosphatase 1A, magnesium dependent       | 72761211  | 72794940  | TC1200000626.mm.1 | 0.2  | 0.070729 |
| TC0500003660.mm.1 | NM_028061          | Cyb561d | cytochrome b-561 domain containing 1              | 108195687 | 108201212 | TC0300002734.mm.1 | -0.1 | 0.070741 |
| TC0500003661.mm.1 | ENSMUST00000120849 | Gm13578 | predicted gene 13578                              | 64867999  | 64868588  | TC0200003653.mm.1 | -0.3 | 0.070797 |
| TC0500003682.mm.1 | NR_045522          | 2-Mar   | membrane-associated ring finger (C3HC4) 2         | 33685692  | 33718677  | TC1700002809.mm.1 | 0.2  | 0.070811 |
| TC0500003692.mm.1 | NM_026341          | Nudt13  | nudix (nucleoside diphosphate linked moiety X)-   | 20294690  | 20317575  | TC1400000163.mm.1 | 0.2  | 0.070852 |
| TC0500003706.mm.1 | NM_026474          | Sugt1   | SGT1, suppressor of G2 allele of SKP1 (S. cerev   | 79587691  | 79629755  | TC1400001107.mm.1 | -0.2 | 0.070904 |
| TC0500003707.mm.1 | ENSMUST00000119327 | Gm13382 | predicted gene 13382                              | 23876030  | 23876161  | TC0200003107.mm.1 | 0.1  | 0.071016 |
| TC0500003715.mm.1 | OTTMUST00000030075 | Bloc1s2 | ---                                               | 52619732  | 52620601  | TC0200000829.mm.1 | -0.1 | 0.071057 |
| TC0500003722.mm.1 | ENSMUST00000122799 | Gm25289 | predicted gene, 25289                             | 12163438  | 12163556  | TC1800000099.mm.1 | 0.1  | 0.071202 |
| TC0500003723.mm.1 | ENSMUST00000075602 | Gm7931  | predicted pseudogene 7931 // predicted gene 9     | 72304118  | 72305276  | TC0800002456.mm.1 | -0.7 | 0.071202 |
| TC0500003725.mm.1 | ENSMUST00000157583 | Gm23751 | predicted gene, 23751                             | 125121724 | 125121859 | TC0600001447.mm.1 | -0.6 | 0.071243 |
| TC0500003729.mm.1 | NM_013777          | Akr1c12 | aldo-keto reductase family 1, member C12          | 4268172   | 4279433   | TC1300001378.mm.1 | 0.1  | 0.071284 |
| TC0500003730.mm.1 | ENSMUST00000104685 | Gm23961 | predicted gene, 23961                             | 22768106  | 22768202  | TC0600001924.mm.1 | 0.3  | 0.071511 |

|                   |                    |          |                                                                 |           |           |                   |      |          |
|-------------------|--------------------|----------|-----------------------------------------------------------------|-----------|-----------|-------------------|------|----------|
| TC0500003731.mm.1 | ENSMUST00000052902 | LOC1010  | mitochondrial import inner membrane translocase                 | 11609257  | 11610438  | TC1000000084.mm.1 | -0.2 | 0.071574 |
| TC0500003734.mm.1 | NCBI_Gene:667542;p | Trav12d  | T cell receptor alpha variable 12D-3                            | 52929789  | 52930282  | TC1400000646.mm.1 | -0.4 | 0.071622 |
| TC0500003735.mm.1 | ENSMUST00000120584 | Gm15610  | predicted gene 15610                                            | 8971948   | 8972142   | TC0500000055.mm.1 | -0.5 | 0.071633 |
| TC0500003740.mm.1 | ENSMUST00000119840 | Gm13140  | predicted gene 13140                                            | 146942476 | 146945825 | TC0400001892.mm.1 | -0.4 | 0.07166  |
| TC0500003744.mm.1 | NM_027218          | Clec4b1  | C-type lectin domain family 4, member b1                        | 123049962 | 123071555 | TC0600001400.mm.1 | 0.2  | 0.071706 |
| TC0500003745.mm.1 | NM_144932          | Acsf3    | acyl-CoA synthetase family member 3                             | 122775505 | 122817881 | TC0800001497.mm.1 | 0.1  | 0.071871 |
| TC0600000001.mm.1 | ENSMUST00000076828 | Gm5265   | predicted pseudogene 5265                                       | 169453528 | 169453869 | TC0100003498.mm.1 | -0.3 | 0.071894 |
| TC0600000004.mm.1 | NM_054093          | Ube3b    | ubiquitin protein ligase E3B                                    | 114421168 | 114421168 | TC0500001223.mm.1 | 0.3  | 0.071916 |
| TC0600000007.mm.1 | NCBI_Gene:633568;p | Ighv5-1  | immunoglobulin heavy variable 5-16                              | 113838526 | 113838983 | TC1200002571.mm.1 | -0.7 | 0.071944 |
| TC0600000008.mm.1 | NM_144854          | Map3k7c  | Map3k7 C-terminal like                                          | 87553330  | 87595336  | TC1600000957.mm.1 | 0.2  | 0.071994 |
| TC0600000014.mm.1 | ENSMUST00000162199 | Gm8429   | predicted gene 8429                                             | 11179793  | 11180618  | TC1400000092.mm.1 | -0.2 | 0.072014 |
| TC0600000041.mm.1 | NR_028551          | Snord53  | small nucleolar RNA, C/D box 53                                 | 71640879  | 71641659  | TC1700001140.mm.1 | -0.5 | 0.072018 |
| TC0600000087.mm.1 | NM_011349          | Sema3f   | sema domain, immunoglobulin domain (Ig), short                  | 107681502 | 107710475 | TC0900003042.mm.1 | 0.2  | 0.072024 |
| TC0600000089.mm.1 | NM_007961          | Etv6     | ets variant gene 6 (TEL oncogene)                               | 134035700 | 134270158 | TC0600001579.mm.1 | -0.2 | 0.072175 |
| TC0600000093.mm.1 | NM_008610          | Mmp2     | matrix metalloproteinase 2                                      | 92827328  | 92853420  | TC0800001077.mm.1 | 0.5  | 0.072207 |
| TC0600000097.mm.1 | NM_001033484       | Iqgap3   | IQ motif containing GTPase activating protein 3                 | 88081971  | 88121048  | TC0300000714.mm.1 | -0.1 | 0.072247 |
| TC0600000102.mm.1 | NM_001110234       | Ngrap1   | nerve growth factor receptor (TNFRSF16) associated              | 136270253 | 136271978 | TC0X00001323.mm.1 | -0.1 | 0.072256 |
| TC0600000113.mm.1 | NM_001042659       | Fzd5     | frizzled homolog 5 (Drosophila)                                 | 64730558  | 64737750  | TC0100002470.mm.1 | 0.2  | 0.072257 |
| TC0600000127.mm.1 | ENSMUST00000179221 | Gm23002  | predicted gene, 23002                                           | 112592967 | 112593073 | TC0600002902.mm.1 | 0.2  | 0.072283 |
| TC0600000130.mm.1 | XM_485592          | Gm5553   | predicted gene 5553                                             | 34306715  | 34307176  | TC0500002234.mm.1 | -0.2 | 0.072297 |
| TC0600000136.mm.1 | NM_001159599       | Nol9     | nucleolar protein 9                                             | 152039321 | 152061494 | TC0400002010.mm.1 | -0.2 | 0.072343 |
| TC0600000138.mm.1 | ENSMUST00000118010 | Rps6-ps  | ribosomal protein S6, pseudogene 3                              | 53689534  | 53690283  | TC0900002311.mm.1 | -0.7 | 0.072363 |
| TC0600000139.mm.1 | ENSMUST00000184667 | AC11871  | N/A                                                             | 82612887  | 82612946  | TC1500001951.mm.1 | -0.2 | 0.072372 |
| TC0600000141.mm.1 | ENSMUST00000171662 | Gm9613   | predicted gene 9613                                             | 35561923  | 35562118  | TC1700001970.mm.1 | -0.4 | 0.072457 |
| TC0600000144.mm.1 | NM_001033464       | Efcab4b  | EF-hand calcium binding domain 4B                               | 127577897 | 127630033 | TC0600001483.mm.1 | -0.1 | 0.072502 |
| TC0600000148.mm.1 | NCBI_Gene:667681;p | Trav12n  | T cell receptor alpha variable 12N-3                            | 53240751  | 53241244  | TC1400000677.mm.1 | -0.4 | 0.07255  |
| TC0600000149.mm.1 | NM_021296          | Grpel2   | GrpE-like 2, mitochondrial                                      | 61710346  | 61726331  | TC1800001429.mm.1 | -0.1 | 0.072622 |
| TC0600000155.mm.1 | ENSMUST00000086958 | Gm7027   | predicted gene 7027                                             | 101573460 | 101574321 | TC0700003840.mm.1 | -0.6 | 0.072793 |
| TC0600000192.mm.1 | NM_001146174       | Rangap1  | RAN GTPase activating protein 1                                 | 81704248  | 81729919  | TC1500001927.mm.1 | -0.3 | 0.072896 |
| TC0600000193.mm.1 | ENSMUST00000104642 | Gm26051  | predicted gene, 26051                                           | 25168372  | 25168464  | TC0500002099.mm.1 | 0.3  | 0.072938 |
| TC0600000196.mm.1 | ENSMUST00000119578 | Gm11643  | predicted gene 11643                                            | 103600242 | 103601105 | TC1100003876.mm.1 | -0.2 | 0.072957 |
| TC0600000198.mm.1 | NM_026864          | Ras11a   | RAS-like, family 11, member A                                   | 146844245 | 146847726 | TC0500001796.mm.1 | 0.1  | 0.073028 |
| TC0600000212.mm.1 | NM_001243067       | Zfp433   | RIKEN cDNA 1700123A16 gene                                      | 81704825  | 81721976  | TC1000000908.mm.1 | -0.3 | 0.073037 |
| TC0600000213.mm.1 | NM_028922          | Ppapdc2  | phosphatidic acid phosphatase type 2 domain containing          | 28963920  | 28966811  | TC1900000427.mm.1 | 0.3  | 0.073043 |
| TC0600000222.mm.1 | NM_026880          | Pink1    | PTEN induced putative kinase 1                                  | 138313409 | 138326307 | TC0400003821.mm.1 | 0.3  | 0.073079 |
| TC0600000225.mm.1 | NCBI_Gene:692187;p | Igkv2-1  | immunoglobulin kappa chain variable 2-137                       | 67555636  | 67556216  | TC0600003504.mm.1 | -0.9 | 0.073121 |
| TC0600000226.mm.1 | NM_001085374       | Mcc      | mutated in colorectal cancers                                   | 44425060  | 44421282  | TC1800001280.mm.1 | 0.2  | 0.073152 |
| TC0600000227.mm.1 | NM_009841          | Cd14     | CD14 antigen                                                    | 36725067  | 36726736  | TC1800001197.mm.1 | 0.2  | 0.073212 |
| TC0600000232.mm.1 | NM_013533          | Gpr162   | G protein-coupled receptor 162                                  | 124858444 | 124863917 | TC0600003123.mm.1 | -0.3 | 0.07323  |
| TC0600000233.mm.1 | NM_175654          | Hist1h4  | histone cluster 1, H4d                                          | 23581598  | 23581990  | TC1300000250.mm.1 | -0.8 | 0.07331  |
| TC0600000240.mm.1 | ENSMUST00000119885 | Gm12727  | predicted gene 12727                                            | 106098924 | 106099282 | TC0400001101.mm.1 | 0.5  | 0.07345  |
| TC0600000244.mm.1 | NM_010104          | Edn1     | endothelin 1                                                    | 42301270  | 42307990  | TC1300000481.mm.1 | 0.1  | 0.073534 |
| TC0600000256.mm.1 | NM_177692          | Bloc1s3  | biogenesis of lysosome-related organelles complex 3             | 19505804  | 19508331  | TC0700002486.mm.1 | -0.2 | 0.073554 |
| TC0600000264.mm.1 | NM_001080386       | Clta     | clathrin, light polypeptide (Lca)                               | 44004452  | 44032846  | TC0400000460.mm.1 | -0.2 | 0.073727 |
| TC0600000278.mm.1 | ENSMUST00000182774 | Gm6085   | predicted gene 6085                                             | 4687934   | 4689403   | TC0100001907.mm.1 | -0.2 | 0.073788 |
| TC0600000279.mm.1 | NM_031182          | Tfap4    | transcription factor AP4                                        | 4544661   | 4559720   | TC1600001131.mm.1 | -0.1 | 0.073793 |
| TC0600000280.mm.1 | ENSMUST00000119242 | Gm14115  | predicted gene 14115                                            | 147280603 | 147281084 | TC0200004793.mm.1 | -0.5 | 0.073849 |
| TC0600000324.mm.1 | NM_153143          | Kctd11   | potassium channel tetramerisation domain containing             | 69878261  | 69881406  | TC1100003072.mm.1 | 0.1  | 0.073856 |
| TC0600000338.mm.1 | NM_001163269       | Lpar5    | lysophosphatidic acid receptor 5                                | 125067920 | 125082472 | TC0600001443.mm.1 | -0.1 | 0.073936 |
| TC0600000345.mm.1 | ENSMUST00000178481 | Gm5644   | predicted gene 5644                                             | 145601811 | 145602301 | TC0X00003135.mm.1 | -0.3 | 0.073954 |
| TC0600000349.mm.1 | ENSMUST00000157969 | Gm23965  | predicted gene, 23965                                           | 103236626 | 103236767 | TC0100002880.mm.1 | 0.2  | 0.073958 |
| TC0600000353.mm.1 | NM_022422          | Gng13    | guanine nucleotide binding protein (G protein), gamma 13        | 25717171  | 25719406  | TC1700000382.mm.1 | 0.1  | 0.074008 |
| TC0600000356.mm.1 | ENSMUST00000184218 | AL59385  | N/A                                                             | 174247928 | 174247995 | TC0200002699.mm.1 | 0.2  | 0.074038 |
| TC0600000360.mm.1 | ENSMUST00000118633 | Gm8802   | predicted gene 8802                                             | 7857108   | 7857847   | TC0500000041.mm.1 | -0.2 | 0.074193 |
| TC0600000373.mm.1 | NM_011681          | Scgb1a1  | secretoglobulin, family 1A, member 1 (uteroglobulin)            | 9083636   | 9087958   | TC1900001080.mm.1 | 0.2  | 0.074313 |
| TC0600000415.mm.1 | NM_010493          | Icam1    | intercellular adhesion molecule 1                               | 21015960  | 21028814  | TC0900000184.mm.1 | -0.2 | 0.074347 |
| TC0600000416.mm.1 | ENSMUST00000120741 | Gm13720  | predicted gene 13720                                            | 85816013  | 85816208  | TC0200003907.mm.1 | -0.3 | 0.074419 |
| TC0600000417.mm.1 | BC158101           | Gm6133   | 60S ribosomal protein L17 pseudogene                            | 78349754  | 78350701  | TC1800000838.mm.1 | -0.2 | 0.074507 |
| TC0600000419.mm.1 | NM_001164177       | Psmid10  | proteasome (prosome, macropain) 26S subunit, delta              | 140948425 | 140956728 | TC0X00003082.mm.1 | -0.2 | 0.074522 |
| TC0600000420.mm.1 | NCBI_Gene:667583;p | Trav5d-1 | T cell receptor alpha variable 5D-4                             | 53001713  | 53002232  | TC1400000651.mm.1 | -0.4 | 0.074524 |
| TC0600000423.mm.1 | ENSMUST00000164699 | Gm6245   | predicted gene 6245                                             | 40778040  | 40778807  | TC1300000459.mm.1 | 0.4  | 0.074547 |
| TC0600000425.mm.1 | NCBI_Gene:628056;p | Igkv1-1  | Igkv1-131 immunoglobulin kappa variable 1-131                   | 67766036  | 67766772  | TC0600002431.mm.1 | -0.4 | 0.074617 |
| TC0600000426.mm.1 | NM_013745          | Nufip1   | nuclear fragile X mental retardation protein in Drosophila      | 76110891  | 76137379  | TC1400001067.mm.1 | -0.2 | 0.074623 |
| TC0600000427.mm.1 | NM_025454          | Ing5     | inhibitor of growth family, member 5                            | 93803965  | 93822101  | TC0100000946.mm.1 | -0.2 | 0.07466  |
| TC0600000428.mm.1 | NM_023371          | Pin1     | protein (peptidyl-prolyl cis/trans isomerase) N-terminal domain | 20652130  | 20666584  | TC0900000177.mm.1 | -0.1 | 0.074795 |
| TC0600000429.mm.1 | ENSMUST00000180022 | Gm8305   | predicted gene 8305                                             | 4922785   | 4923979   | TC1400001384.mm.1 | -0.2 | 0.074795 |
| TC0600000430.mm.1 | ENSMUST00000122790 | Gm22067  | predicted gene, 22067                                           | 81592093  | 81592199  | TC1500000724.mm.1 | -0.4 | 0.074861 |
| TC0600000431.mm.1 | NM_016876          | Eif3g    | eukaryotic translation initiation factor 3, subunit gamma       | 20894349  | 20898600  | TC0900001850.mm.1 | -0.3 | 0.074877 |
| TC0600000432.mm.1 | NR_030491          | Mir710   | microRNA 710                                                    | 64514332  | 64514441  | TC0800002309.mm.1 | 0.1  | 0.07518  |
| TC0600000434.mm.1 | NM_172621          | Clic5    | chloride intracellular channel 5                                | 44188572  | 44280168  | TC1700000846.mm.1 | -0.4 | 0.075282 |
| TC0600000444.mm.1 | ENSMUST00000158018 | Gm26484  | predicted gene, 26484                                           | 29487717  | 29487822  | TC0600001982.mm.1 | 0.2  | 0.075314 |
| TC0600000445.mm.1 | NM_001081471       | Mettl7a  | methyltransferase like 7A3                                      | 100334929 | 100340341 | TC1500001041.mm.1 | 0.2  | 0.075333 |
| TC0600000446.mm.1 | NM_001011736       | Olfr205  | olfactory receptor 205                                          | 59328543  | 59329532  | TC1600001800.mm.1 | 0.1  | 0.075349 |
| TC0600000454.mm.1 | ENSMUST00000158486 | Gm25907  | predicted gene, 25907                                           | 81965710  | 81965834  | TC0700001180.mm.1 | -0.3 | 0.075421 |
| TC0600000457.mm.1 | ENSMUST00000121997 | Gm15167  | predicted gene 15167                                            | 147733154 | 147733481 | TC0X00001461.mm.1 | -0.1 | 0.075468 |
| TC0600000459.mm.1 | NM_026720          | Ankrd13  | ankyrin repeat domain 13 family, member D                       | 4270180   | 4283137   | TC1900000915.mm.1 | -0.1 | 0.075475 |
| TC0600000469.mm.1 | NM_011622          | Tom1     | target of myb1 homolog (chicken)                                | 75033686  | 75070121  | TC0800000844.mm.1 | 0.2  | 0.075557 |
| TC0600000470.mm.1 | ENSMUST00000175097 | Gm24824  | predicted gene, 24824                                           | 20823737  | 20823814  | TC0X00001929.mm.1 | -0.3 | 0.075638 |

|                   |                    |         |                                                 |           |           |                   |      |          |
|-------------------|--------------------|---------|-------------------------------------------------|-----------|-----------|-------------------|------|----------|
| TC0600000479.mm.1 | ENSMUST00000052877 | Gm12663 | predicted gene 12663                            | 16634962  | 16636140  | TC1100002241.mm.1 | -0.2 | 0.075653 |
| TC0600000481.mm.1 | NM_009742          | Bcl2a1a | B cell leukemia/lymphoma 2 related protein A1a  | 88956920  | 88962416  | TC0900001142.mm.1 | -0.2 | 0.075656 |
| TC0600000486.mm.1 | ENSMUST00000117821 | Gm15528 | predicted gene 15528                            | 75929465  | 75930328  | TC1300002337.mm.1 | -0.1 | 0.075757 |
| TC0600000532.mm.1 | ENSMUST00000083775 | Gm22341 | predicted gene, 22341                           | 99113155  | 99113283  | TC0300002569.mm.1 | -0.2 | 0.075851 |
| TC0600000534.mm.1 | NCBI_Gene:627324:p | Trav9-1 | T cell receptor alpha variable 9-1              | 53487998  | 53488703  | TC1400000696.mm.1 | -0.4 | 0.075876 |
| TC0600000536.mm.1 | NCBI_Gene:628027:p | Igkv1-1 | immunoglobulin kappa variable 1-133             | 67724914  | 67725661  | TC0600003506.mm.1 | -1.1 | 0.075887 |
| TC0600000540.mm.1 | NM_181590          | Shq1    | SHQ1 homolog (S. cerevisiae)                    | 100573081 | 100671157 | TC0600002858.mm.1 | -0.1 | 0.075906 |
| TC0600000542.mm.1 | NM_001081280       | Nlr3    | NLR family, CARD domain containing 3            | 3945007   | 3976632   | TC1600001111.mm.1 | -0.2 | 0.075907 |
| TC0600000546.mm.1 | NM_026316          | Aldh3b1 | aldehyde dehydrogenase 3 family, member B1      | 3913491   | 3929761   | TC1900000890.mm.1 | 0.2  | 0.075916 |
| TC0600000552.mm.1 | ENSMUST00000118119 | Gm14388 | predicted gene 14388                            | 122442023 | 122442499 | TC0700001759.mm.1 | -0.2 | 0.075932 |
| TC0600000555.mm.1 | NM_010637          | Klf4    | Kruppel-like factor 4 (gut)                     | 55527137  | 55532475  | TC0400002694.mm.1 | 0.2  | 0.075955 |
| TC0600000556.mm.1 | NM_010515          | Igf2r   | insulin-like growth factor 2 receptor           | 12682406  | 12769706  | TC1700001451.mm.1 | 0.2  | 0.075982 |
| TC0600000562.mm.1 | NM_025445          | Arfgap3 | ADP-ribosylation factor GTPase activating prote | 83299739  | 83350247  | TC1600001971.mm.1 | 0.3  | 0.075993 |
| TC0600000564.mm.1 | ENSMUST00000175621 | Gm22802 | predicted gene, 22802                           | 111282046 | 111282134 | TC1400001234.mm.1 | 0.6  | 0.075998 |
| TC0600000565.mm.1 | NM_013527          | Gdf7    | growth differentiation factor 7                 | 8297918   | 8301954   | TC1200001393.mm.1 | -0.1 | 0.076003 |
| TC0600000566.mm.1 | NR_029725          | Mirlet7 | microRNA let7a-1                                | 48538171  | 48538272  | TC1300001943.mm.1 | 0.2  | 0.076057 |
| TC0600000570.mm.1 | NM_026345          | Mancs1  | MANSC domain containing 1                       | 134609207 | 134632488 | TC0600003305.mm.1 | 0.1  | 0.076074 |
| TC0600000572.mm.1 | NM_001290279       | Rcor3   | REST corepressor 3 (Rcor3), transcript variant  | 0         | 0         | TSUnmapped0000000 | 0.1  | 0.076089 |
| TC0600000578.mm.1 | NM_027194          | Tm2d2   | TM2 domain containing 2                         | 25017211  | 25023260  | TC0800000312.mm.1 | 0.2  | 0.076192 |
| TC0600000588.mm.1 | NM_011175          | Lgmn    | legumain                                        | 102394084 | 102439813 | TC1200002251.mm.1 | 0.6  | 0.076242 |
| TC0600000591.mm.1 | NCBI_Gene:627171:p | Trav1   | T cell receptor alpha variable 1                | 52427928  | 52428876  | TC1400000613.mm.1 | -0.1 | 0.076259 |
| TC0600000606.mm.1 | NR_030252          | Mir484  | microRNA 484                                    | 14159626  | 14159692  | TC1600000175.mm.1 | 0.3  | 0.076314 |
| TC0600000612.mm.1 | NM_026845          | Ppil1   | peptidylprolyl isomerase (cyclophilin)-like 1   | 29250803  | 29264158  | TC1700001781.mm.1 | -0.1 | 0.076378 |
| TC0600000624.mm.1 | NM_009212          | Ighmbp2 | immunoglobulin mu binding protein 2             | 3259076   | 3283017   | TC1900000878.mm.1 | -0.1 | 0.076475 |
| TC0600000639.mm.1 | NM_029344          | Acp2    | acylphosphatase 2, muscle type                  | 30505991  | 30649587  | TC1100002438.mm.1 | 0.3  | 0.076489 |
| TC0600000645.mm.1 | ENSMUST00000120791 | Gm6823  | predicted gene 6823                             | 70420716  | 70422554  | TC0X00002388.mm.1 | -0.3 | 0.076547 |
| TC0600000659.mm.1 | NM_019570          | Rev1    | REV1 homolog (S. cerevisiae)                    | 38052786  | 38129662  | TC0100002214.mm.1 | -0.1 | 0.076642 |
| TC0600000661.mm.1 | NM_010421          | Hexa    | hexosaminidase A                                | 59539667  | 59565110  | TC0900000748.mm.1 | 0.4  | 0.076762 |
| TC0600000664.mm.1 | ENSMUST00000171515 | Gm17268 | predicted gene, 17268                           | 82028224  | 82038562  | TC1100003361.mm.1 | 0.1  | 0.076784 |
| TC0600000678.mm.1 | NM_023121          | Gngt2   | guanine nucleotide binding protein (G protein), | 95837216  | 95845734  | TC1100001474.mm.1 | -0.1 | 0.07682  |
| TC0600000681.mm.1 | NM_024499          | Sgta    | small glutamine-rich tetratricopeptide repeat ( | 81044073  | 81060178  | TC1000002524.mm.1 | 0.4  | 0.076823 |
| TC0600000685.mm.1 | NM_001168472       | Dynl12  | dynein light chain LC8-type 2                   | 87979525  | 87998298  | TC1100003491.mm.1 | 0.1  | 0.076829 |
| TC0600000695.mm.1 | NM_134028          | Tubg2   | tubulin, gamma 2                                | 101155884 | 101161787 | TC1100001643.mm.1 | -0.3 | 0.076855 |
| TC0600000697.mm.1 | XM_357752          | Gm5331  | predicted gene 5331                             | 46832464  | 46839328  | TC0700000880.mm.1 | 0.1  | 0.076916 |
| TC0600000698.mm.1 | NM_011213          | Ptpfr   | protein tyrosine phosphatase, receptor type, F  | 118208213 | 118291405 | TC0400003386.mm.1 | -0.3 | 0.076948 |
| TC0600000701.mm.1 | NCBI_Gene:381777:p | Igkv1-1 | immunoglobulin kappa variable 1-110             | 68270495  | 68271267  | TC0600003517.mm.1 | -1.2 | 0.076971 |
| TC0600000702.mm.1 | ENSMUST00000183908 | AC16460 | N/A                                             | 115499019 | 115499094 | TC1200002485.mm.1 | 0.2  | 0.076988 |
| TC0600000706.mm.1 | NM_001039720       | 9030619 | RIKEN cDNA 9030619P08 gene                      | 75427606  | 75431829  | TC1500001736.mm.1 | 0.3  | 0.077116 |
| TC0600000722.mm.1 | NM_008620          | Gbp4    | guanylate binding protein 4                     | 105115767 | 105139586 | TC0500003731.mm.1 | -0.4 | 0.07714  |
| TC0600000753.mm.1 | ENSMUST00000121031 | Gm13136 | predicted gene 13136                            | 147735477 | 147738426 | TC0400003996.mm.1 | -0.3 | 0.07715  |
| TC0600000757.mm.1 | ENSMUST00000184712 | AC15899 | N/A                                             | 73005211  | 73005316  | TC0900000986.mm.1 | -0.3 | 0.077183 |
| TC0600000778.mm.1 | NM_025378          | Ifitm3  | interferon induced transmembrane protein 3      | 141009586 | 141010770 | TC0700004515.mm.1 | 0.4  | 0.077225 |
| TC0600000779.mm.1 | NM_021440          | BC10045 | cDNA sequence BC100451                          | 118332360 | 118342542 | TC1100004158.mm.1 | 0.1  | 0.077241 |
| TC0600000786.mm.1 | NM_026405          | Rab32   | RAB32, member RAS oncogene family               | 10545011  | 10558233  | TC1000001744.mm.1 | 0.2  | 0.077256 |
| TC0600000793.mm.1 | NM_008784          | Igbb1   | immunoglobulin (CD79A) binding protein 1        | 100494291 | 100516125 | TC0X00000951.mm.1 | -0.2 | 0.077292 |
| TC0600000794.mm.1 | NM_029640          | Trappc9 | trafficking protein particle complex 9          | 72589620  | 73061204  | TC1500001684.mm.1 | 0.2  | 0.07731  |
| TC0600000799.mm.1 | NM_023322          | Zkscan1 | zinc finger with KRAB and SCAN domains 14       | 145194946 | 145201882 | TC0500003592.mm.1 | -0.1 | 0.077321 |
| TC0600000800.mm.1 | NM_019419          | Arl6ip1 | ADP-ribosylation factor-like 6 interacting prot | 118118890 | 118129625 | TC0700004165.mm.1 | -0.4 | 0.077408 |
| TC0600000802.mm.1 | NM_007533          | Bckdha  | branched chain ketoacid dehydrogenase E1, alpt  | 25629852  | 25658761  | TC0700002639.mm.1 | 0.3  | 0.077509 |
| TC0600000807.mm.1 | NM_146032          | Srp68   | signal recognition particle 68                  | 116245166 | 116274217 | TC1100004110.mm.1 | -0.3 | 0.077522 |
| TC0600000811.mm.1 | NM_019883          | Uba52   | ubiquitin A-52 residue ribosomal protein fusion | 70508263  | 70510801  | TC0800003244.mm.1 | -0.1 | 0.077599 |
| TC0600000821.mm.1 | NM_144824          | Wrap53  | WD repeat containing, antisense to TP53         | 69561754  | 69580256  | TC1100003047.mm.1 | -0.1 | 0.077657 |
| TC0600000826.mm.1 | NM_013559          | Hsph1   | heat shock 105kDa/110kDa protein 1              | 149614287 | 149636376 | TC0500003660.mm.1 | -0.2 | 0.077697 |
| TC0600000827.mm.1 | NM_019805          | Anapc7  | anaphase promoting complex subunit 7            | 122421693 | 122444912 | TC0500001394.mm.1 | -0.1 | 0.077827 |
| TC0600000834.mm.1 | XM_001478911       | Gm10294 | predicted pseudogene 10294                      | 72648757  | 72669596  | TC0700003486.mm.1 | -0.1 | 0.077829 |
| TC0600000841.mm.1 | BC016578           | Gm20274 | predicted gene, 20274                           | 122995348 | 122995918 | TC0700001767.mm.1 | -0.2 | 0.078    |
| TC0600000849.mm.1 | ENSMUST00000118579 | Gm11624 | predicted gene 11624                            | 105033034 | 105034074 | TC1100003904.mm.1 | -0.2 | 0.078007 |
| TC0600000854.mm.1 | NM_022015          | Taf8    | TAF8 RNA polymerase II, TATA box binding prote  | 47488050  | 47502287  | TC1700002207.mm.1 | -0.2 | 0.07809  |
| TC0600000867.mm.1 | NM_201406          | Pigs    | phosphatidylinositol glycan anchor biosynthesis | 78328415  | 78343010  | TC1100001157.mm.1 | 0.2  | 0.078147 |
| TC0600000873.mm.1 | NCBI_Gene:628268:p | Igkv2-1 | immunoglobulin kappa variable 2-109             | 68302439  | 68303160  | TC0600003518.mm.1 | -0.6 | 0.078192 |
| TC0600000880.mm.1 | NM_080463          | Pofut1  | protein O-fucosyltransferase 1                  | 153241532 | 153270253 | TC0200002312.mm.1 | 0.1  | 0.078298 |
| TC0600000884.mm.1 | NCBI_Gene:545847:p | Igkv14- | immunoglobulin kappa variable 14-111            | 68256404  | 68256869  | TC0600003516.mm.1 | -0.7 | 0.078319 |
| TC0600000898.mm.1 | NM_007426          | Angpt2  | angiopoietin 2                                  | 18690263  | 18741562  | TC0800001797.mm.1 | 0.1  | 0.078379 |
| TC0600000899.mm.1 | NM_011760          | Zfp54   | zinc finger protein 54                          | 21423227  | 21435640  | TC1700000270.mm.1 | -0.1 | 0.078387 |
| TC0600000916.mm.1 | NM_175659          | Hist1h2 | histone cluster 1, H2ah                         | 22035113  | 22035643  | TC1300001574.mm.1 | -0.3 | 0.078412 |
| TC0600000922.mm.1 | NM_009183          | St8sia4 | ST8 alpha-N-acetyl-neuraminide alpha-2,8-sialyl | 95587682  | 95667594  | TC0100002844.mm.1 | -0.3 | 0.078458 |
| TC0600000934.mm.1 | NM_028044          | Cnn3    | calponin 3, acidic                              | 121426540 | 121458205 | TC0300001232.mm.1 | -0.5 | 0.078499 |
| TC0600000936.mm.1 | NCBI_Gene:630061:p | Trav7-5 | Trav7-5 T cell receptor alpha variable 7-5      | 53530783  | 53531313  | TC1400000699.mm.1 | -0.5 | 0.07861  |
| TC0600000937.mm.1 | NM_030729          | Nckipsd | NCK interacting protein with SH3 domain         | 108808380 | 108818450 | TC0900001423.mm.1 | 0.1  | 0.078682 |
| TC0600000952.mm.1 | XM_003688896       | Gm21559 | predicted gene, 21559                           | 87765371  | 87766300  | TC1200002129.mm.1 | -0.1 | 0.078702 |
| TC0600000954.mm.1 | NM_001048206       | Traf3   | TNF receptor-associated factor 3                | 111166370 | 111267155 | TC1200001231.mm.1 | -0.1 | 0.07872  |
| TC0600000956.mm.1 | NM_178246          | Smg5    | Smg-5 homolog, nonsense mediated mRNA decã      | 88336260  | 88362337  | TC0300000724.mm.1 | -0.1 | 0.078721 |
| TC0600000957.mm.1 | NM_172756          | Ankle1  | ankyrin repeat and LEM domain containing 1      | 71406010  | 71409904  | TC0800000787.mm.1 | -0.1 | 0.078779 |
| TC0600000958.mm.1 | NM_029857          | Tmco4   | transmembrane and coiled-coil domains 4         | 138972888 | 139059171 | TC0400001738.mm.1 | -0.1 | 0.078831 |
| TC0600000963.mm.1 | ENSMUST00000180307 | Gm23190 | predicted gene, 23190                           | 116242504 | 116242567 | TC1200002494.mm.1 | 0.4  | 0.078861 |
| TC0600000967.mm.1 | ENSMUST00000104192 | Gm22661 | predicted gene, 22661                           | 95332618  | 95332749  | TC1300001077.mm.1 | -0.3 | 0.078875 |
| TC0600000968.mm.1 | NM_029999          | Lbh     | limb-bud and heart                              | 72918305  | 72941946  | TC1700001147.mm.1 | -0.5 | 0.078961 |
| TC0600000980.mm.1 | NM_025531          | Slmo2   | slowmo homolog 2 (Drosophila)                   | 174465067 | 174473081 | TC0200005317.mm.1 | -0.2 | 0.079047 |

|                   |                    |         |                                                 |           |           |                    |      |          |
|-------------------|--------------------|---------|-------------------------------------------------|-----------|-----------|--------------------|------|----------|
| TC0600000982.mm.1 | NCBI_Gene:629897:p | Ighv1-3 | immunoglobulin heavy variable 1-36              | 114879888 | 114880321 | TC1200002621.mm.1  | -0.8 | 0.079059 |
| TC0600000985.mm.1 | NM_008843          | Pip     | prolactin induced protein                       | 41847549  | 41852065  | TC0600000446.mm.1  | -0.7 | 0.079072 |
| TC0600000986.mm.1 | NM_146218          | Rfwd3   | ring finger and WD repeat domain 3              | 111270944 | 111300222 | TC0800002945.mm.1  | -0.3 | 0.07921  |
| TC0600001014.mm.1 | ENSMUST00000116917 | Gm25680 | predicted gene, 25680                           | 10485051  | 10485176  | TC0200000129.mm.1  | -0.2 | 0.079338 |
| TC0600001016.mm.1 | ENSMUST00000116962 | Gm22635 | predicted gene, 22635                           | 10492421  | 10492546  | TC0200000147.mm.1  | -0.2 | 0.079338 |
| TC0600001027.mm.1 | ENSMUST00000118168 | Gm11336 | predicted gene 11336                            | 23746166  | 23746499  | TC1300001643.mm.1  | -0.4 | 0.079347 |
| TC0600001033.mm.1 | BC119204           | Chp2    | calcineurin-like EF hand protein 2              | 122219496 | 122222824 | TC0700001754.mm.1  | 0.2  | 0.079545 |
| TC0600001051.mm.1 | ENSMUST00000178853 | Gm8034  | predicted gene 8034                             | 6044691   | 60444822  | TC1900000997.mm.1  | -0.8 | 0.079626 |
| TC0600001055.mm.1 | NM_173032          | Tbck    | TBC1 domain containing kinase                   | 132684144 | 132838506 | TC0300001347.mm.1  | 0.2  | 0.079708 |
| TC0600001061.mm.1 | NM_025674          | Tcf19   | transcription factor 19                         | 35512734  | 35516824  | TC1700001969.mm.1  | -0.2 | 0.079734 |
| TC0600001065.mm.1 | NM_026832          | Cgrrf1  | cell growth regulator with ring finger domain 1 | 46832134  | 46854198  | TC1400000502.mm.1  | 0.2  | 0.079738 |
| TC0600001072.mm.1 | NM_146043          | Spin1   | spindlin 1                                      | 51100880  | 51152562  | TC1300000594.mm.1  | -0.2 | 0.079739 |
| TC0600001074.mm.1 | NM_001033988       | Ncoa4   | nuclear receptor coactivator 4                  | 32159865  | 32179855  | TC1400000340.mm.1  | 0.3  | 0.079751 |
| TC0600001076.mm.1 | NM_027295          | Rab28   | RAB28, member RAS oncogene family               | 41624976  | 41708155  | TC0500002302.mm.1  | 0.2  | 0.079797 |
| TC0600001078.mm.1 | NM_181419          | Zfp599  | zinc finger protein 599                         | 22247430  | 22259895  | TC0900001903.mm.1  | -0.2 | 0.080031 |
| TC0600001080.mm.1 | NM_007508          | Atp6v1a | ATPase, H+ transporting, lysosomal V1 subunit A | 44085402  | 44139705  | TC1600001641.mm.1  | 0.3  | 0.080057 |
| TC0600001085.mm.1 | NM_001033320       | Rltpr   | RGD motif, leucine rich repeats, tropomodulin d | 105690906 | 105698178 | TC0800001226.mm.1  | -0.3 | 0.080106 |
| TC0600001092.mm.1 | NM_019986          | Habp4   | hyaluronic acid binding protein 4               | 64161866  | 64186537  | TC1300000778.mm.1  | 0.1  | 0.080162 |
| TC0600001108.mm.1 | NM_026229          | Gpr89   | G protein-coupled receptor 89                   | 96868281  | 96905346  | TC0300002531.mm.1  | 0.1  | 0.080326 |
| TC0600001110.mm.1 | ENSMUST00000104170 | Gm26293 | predicted gene, 26293                           | 59692509  | 59692592  | TC0100000458.mm.1  | -0.9 | 0.08048  |
| TC0600001119.mm.1 | NCBI_Gene:328483:p | Trav6-3 | T cell receptor alpha variable 6-3              | 53428711  | 53430377  | TC1400000692.mm.1  | -0.2 | 0.08055  |
| TC0600001120.mm.1 | NM_198424          | Orai3   | ORAI calcium release-activated calcium modulat  | 127769815 | 127775150 | TC0700001862.mm.1  | 0.2  | 0.080558 |
| TC0600001129.mm.1 | NM_172775          | Plxnb1  | plexin B1                                       | 109095436 | 109119915 | TC0900001434.mm.1  | -0.1 | 0.080575 |
| TC0600001134.mm.1 | ENSMUST00000052867 | Fau     | Finkel-Biskis-Reilly murine sarcoma virus (FBR- | 76403209  | 76403712  | TC1600001925.mm.1  | -0.6 | 0.080645 |
| TC0600001146.mm.1 | NM_009114          | S100a9  | S100 calcium binding protein A9 (calgranulin B) | 90692630  | 90695721  | TC0300002376.mm.1  | -0.2 | 0.080654 |
| TC0600001154.mm.1 | NM_008791          | Pcp4    | Purkinje cell protein 4                         | 96467606  | 96525793  | TC1600002175.mm.1  | -0.3 | 0.080704 |
| TC0600001155.mm.1 | ENSMUST00000120617 | Gm13396 | predicted gene 13396                            | 29093835  | 29094105  | TC0200003243.mm.1  | -0.3 | 0.080722 |
| TC0600001174.mm.1 | ENSMUST00000109187 | Hsp25-p | heat shock protein 25, pseudogene 1             | 45078498  | 45079127  | TC1300001906.mm.1  | 0.4  | 0.080748 |
| TC0600001177.mm.1 | NR_000003          | Snord35 | small nucleolar RNA, C/D box 35A                | 45126346  | 45126435  | TC0700002993.mm.1  | -1.0 | 0.080753 |
| TC0600001178.mm.1 | NM_009665          | Amd1    | S-adenosylmethionine decarboxylase 1            | 40287458  | 40302188  | TC1000002043.mm.1  | -1.0 | 0.08076  |
| TC0600001188.mm.1 | NCBI_Gene:385277:p | Igkv4-6 | Igkv4-60 immunoglobulin kappa variable 4-60     | 69463288  | 69463725  | TC0600003567.mm.1  | -1.0 | 0.080764 |
| TC0600001192.mm.1 | NR_000004          | Snord35 | small nucleolar RNA, C/D box 35B                | 45123025  | 45123111  | TC0700002991.mm.1  | -1.0 | 0.080819 |
| TC0600001203.mm.1 | NR_030534          | Mir181d | microRNA 181d                                   | 84178716  | 84178787  | TC0800002572.mm.1  | 0.2  | 0.080829 |
| TC0600001207.mm.1 | NR_035502          | Mir1981 | microRNA 1981                                   | 184822407 | 184822488 | TC0100003740.mm.1  | 0.1  | 0.08099  |
| TC0600001209.mm.1 | NM_028658          | Ppp1r21 | protein phosphatase 1, regulatory subunit 21    | 88530124  | 88588367  | TC1700001322.mm.1  | -0.2 | 0.081019 |
| TC0600001214.mm.1 | NR_037920          | Zfa-ps  | zinc finger protein, autosomal, pseudogene      | 52542318  | 52545739  | TC0200002160.mm.1  | -0.2 | 0.081058 |
| TC0600001234.mm.1 | NM_001010837       | Taar8b  | trace amine-associated receptor 8B              | 24091195  | 24092320  | TC1000001884.mm.1  | 0.2  | 0.081073 |
| TC0600001235.mm.1 | NM_001002239       | Rpl17   | ribosomal protein L17                           | 75000477  | 75003381  | TC1800000797.mm.1  | -0.5 | 0.081129 |
| TC0600001237.mm.1 | XM_003084766       | Gm10015 | predicted gene 10015                            | 61364019  | 61364483  | TC0800002295.mm.1  | -0.3 | 0.081199 |
| TC0600001243.mm.1 | ENSMUST00000157135 | Gm23980 | predicted gene, 23980                           | 23646420  | 23646577  | TC1500001264.mm.1  | 0.2  | 0.081242 |
| TC0600001246.mm.1 | ENSMUST00000156439 | Gm6182  | predicted gene 6182                             | 176201042 | 176203572 | TC0200002734.mm.1  | 0.1  | 0.081374 |
| TC0600001250.mm.1 | ENSMUST00000166096 | Gm17257 | predicted gene, 17257                           | 80507787  | 80508254  | TC0700001156.mm.1  | 0.3  | 0.081385 |
| TC0600001253.mm.1 | NM_183017          | Ttll12  | tubulin tyrosine ligase-like family, member 12  | 83575094  | 83595157  | TC1500001979.mm.1  | -0.3 | 0.081565 |
| TC0600001257.mm.1 | NM_025441          | Nemf    | nuclear export mediator factor                  | 69311543  | 69357176  | TC1200001863.mm.1  | -0.3 | 0.081786 |
| TC0600001259.mm.1 | NM_029575          | Tgfbr2  | transforming growth factor, beta receptor II    | 116087695 | 116175363 | TC0900003199.mm.1  | 0.3  | 0.081881 |
| TC0600001269.mm.1 | ENSMUST00000118511 | Gm11977 | predicted gene 11977                            | 6781678   | 6783138   | TC1100002187.mm.1  | -0.2 | 0.081927 |
| TC0600001274.mm.1 | NM_001199308       | Gm14440 | predicted gene 14440                            | 175785502 | 175801093 | TC0200005342.mm.1  | 0.5  | 0.081997 |
| TC0600001278.mm.1 | ENSMUST00000120174 | Gm8566  | predicted pseudogene 8566                       | 67205619  | 67206083  | TC0600000786.mm.1  | 0.5  | 0.082051 |
| TC0600001279.mm.1 | NM_023906          | Asb3    | ankyrin repeat and SOCS box-containing 3        | 30954395  | 31102704  | TC1100000316.mm.1  | -0.1 | 0.082272 |
| TC0600001283.mm.1 | NM_177815          | Rft1    | RFT1 homolog (S. cerevisiae)                    | 30654360  | 30691317  | TC1400000309.mm.1  | 0.2  | 0.082288 |
| TC0600001285.mm.1 | ENSMUST00000082896 | Gm25699 | predicted gene, 25699                           | 73422793  | 73422959  | TC1600001883.mm.1  | 0.2  | 0.082309 |
| TC0600001287.mm.1 | NM_001160043       | Exo5    | exonuclease 5                                   | 120921196 | 120925017 | TC0400003445.mm.1  | -0.2 | 0.082317 |
| TC0600001293.mm.1 | NM_001013787       | Vmn1r20 | vomeronasal 1 receptor 209                      | 22805580  | 22806518  | TC1300001603.mm.1  | 0.2  | 0.082332 |
| TC0600001294.mm.1 | ENSMUST00000082975 | Gm25401 | predicted gene, 25401                           | 41339436  | 41339541  | TC0900002108.mm.1  | -0.3 | 0.082345 |
| TC0600001305.mm.1 | NM_009096          | Rps6    | ribosomal protein S6                            | 86854099  | 86857412  | TC0400002986.mm.1  | -0.2 | 0.082406 |
| TC0600001308.mm.1 | NCBI_Gene:668517:p | Ighv1-3 | immunoglobulin heavy variable 1-37              | 114896238 | 114896671 | TC1200002622.mm.1  | -0.9 | 0.08242  |
| TC0600001313.mm.1 | NM_198617          | Tspsy13 | TSPY-like 3                                     | 153222370 | 153225441 | TC0200004925.mm.1  | -0.1 | 0.082438 |
| TC0600001318.mm.1 | NM_145591          | Zfp958  | zinc finger protein 958                         | 4613167   | 4630231   | TC0800000039.mm.1  | -0.1 | 0.082451 |
| TC0600001322.mm.1 | ENSMUST00000158625 | Gm25713 | predicted gene, 25713                           | 12158333  | 12158441  | TC1500001220.mm.1  | 0.1  | 0.082509 |
| TC0600001325.mm.1 | NM_001081419       | Dip2a   | DIP2 disco-interacting protein 2 homolog A (Dro | 76259429  | 76345291  | TC1000002399.mm.1  | 0.1  | 0.082513 |
| TC0600001331.mm.1 | NM_011517          | Sycp3   | synaptonemal complex protein 3                  | 88459569  | 88473236  | TC1000001081.mm.1  | 0.6  | 0.082514 |
| TC0600001336.mm.1 | XM_003688933       | Gm21162 | predicted gene, 21162                           | 43513408  | 43517178  | TC1400001858.mm.1  | 0.2  | 0.082522 |
| TC0600001341.mm.1 | NCBI_Gene:780883:p | Ighv1-2 | immunoglobulin heavy variable 1-22              | 114746273 | 114746706 | TC1200002614.mm.1  | -0.9 | 0.082525 |
| TC0600001342.mm.1 | NCBI_Gene:435331:p | Ighv1-7 | Ighv1-79 immunoglobulin heavy variable 1-79     | 115888096 | 115888389 | TC1200002488.mm.1  | -0.5 | 0.082559 |
| TC0600001347.mm.1 | XM_484880          | Gm5528  | predicted gene 5528                             | 72004286  | 72004470  | TC0100000594.mm.1  | -0.4 | 0.082587 |
| TC0600001350.mm.1 | ENSMUST00000165071 | Traj54  | T cell receptor alpha joining 54                | 54161990  | 54162043  | TC1400000728.mm.1  | -0.4 | 0.082688 |
| TC0600001366.mm.1 | NM_028728          | Nfam1   | Nfat activating molecule with ITAM motif 1      | 82996736  | 83033397  | TC1500001963.mm.1  | 0.1  | 0.082759 |
| TC0600001368.mm.1 | ENSMUST00000083865 | Gm25517 | predicted gene, 25517                           | 75972486  | 75972619  | TC1400002436.mm.1  | -0.3 | 0.082813 |
| TC0600001369.mm.1 | ENSMUST00000118327 | Gm7199  | predicted gene 7199                             | 163477652 | 163479136 | TC0X00001657.mm.1  | -0.1 | 0.082817 |
| TC0600001370.mm.1 | NR_028273          | Snord14 | small nucleolar RNA, C/D box 14A                | 116333171 | 116333257 | TC07000004156.mm.1 | -0.6 | 0.082841 |
| TC0600001371.mm.1 | NM_010188          | Fcgr3   | Fc receptor, IgG, low affinity III              | 171051169 | 171064935 | TC0100003524.mm.1  | 0.3  | 0.082854 |
| TC0600001373.mm.1 | NM_001164604       | Nsmce2  | non-SMC element 2 homolog (MMS21, S. cerevi:    | 59374198  | 59601684  | TC1500000433.mm.1  | -0.3 | 0.082882 |
| TC0600001377.mm.1 | NM_023732          | Abcb6   | ATP-binding cassette, sub-family B (MDR/TAP), n | 75171640  | 75180392  | TC0100002601.mm.1  | 0.1  | 0.08296  |
| TC0600001380.mm.1 | NM_173764          | Tapt1   | transmembrane anterior posterior transformatic  | 44175159  | 44226606  | TC0500002325.mm.1  | -0.8 | 0.083017 |
| TC0600001381.mm.1 | NM_153806          | Dnttip2 | deoxynucleotidyltransferase, terminal, interact | 122274414 | 122285271 | TC0300001245.mm.1  | -0.3 | 0.083044 |
| TC0600001383.mm.1 | NM_178791          | Vstm4   | V-set and transmembrane domain containing 4     | 32856756  | 32939489  | TC1400000352.mm.1  | 0.2  | 0.083058 |
| TC0600001384.mm.1 | NCBI_Gene:386450:p | Trav7-4 | Trav7-4 T cell receptor alpha variable 7-4      | 53461099  | 53461738  | TC1400002811.mm.1  | -0.5 | 0.083084 |
| TC0600001387.mm.1 | NCBI_Gene:692154:p | Igkv1-8 | immunoglobulin kappa chain variable 1-88        | 68862265  | 68863031  | TC0600003550.mm.1  | -0.7 | 0.08311  |

|                   |                    |          |                                                 |           |           |                    |      |          |
|-------------------|--------------------|----------|-------------------------------------------------|-----------|-----------|--------------------|------|----------|
| TC0600001390.mm.1 | NR_004414          | Rnu2-10  | U2 small nuclear RNA 10                         | 101658238 | 101658428 | TC1100001667.mm.1  | -1.1 | 0.083214 |
| TC0600001394.mm.1 | NM_030198          | Gins3    | GIN5 complex subunit 3 (Psf3 homolog)           | 95633559  | 95645059  | TC0800001142.mm.1  | -0.2 | 0.083218 |
| TC0600001397.mm.1 | NM_028117          | Chst14   | carbohydrate (N-acetylglactosamine 4-O) sulfot  | 118926496 | 118928585 | TC0200001751.mm.1  | 0.1  | 0.083241 |
| TC0600001398.mm.1 | ENSMUST00000173648 | Gm20478  | predicted gene 20478                            | 36167982  | 36171805  | TC1700000724.mm.1  | -0.1 | 0.083315 |
| TC0600001400.mm.1 | NM_026040          | Srfbp1   | serum response factor binding protein 1         | 52465693  | 52491267  | TC1800000523.mm.1  | -0.2 | 0.083326 |
| TC0600001401.mm.1 | ENSMUST00000158806 | Gm23196  | predicted gene, 23196                           | 132939870 | 132939976 | TC0300001351.mm.1  | 0.2  | 0.083418 |
| TC0600001404.mm.1 | ENSMUST00000082633 | Gm24143  | predicted gene, 24143                           | 72616006  | 72616150  | TC1100003150.mm.1  | -0.5 | 0.083427 |
| TC0600001413.mm.1 | NM_023173          | Dusp12   | dual specificity phosphatase 12                 | 170873498 | 170885540 | TC0100003518.mm.1  | -0.1 | 0.083433 |
| TC0600001418.mm.1 | ENSMUST00000083866 | Gm23042  | predicted gene, 23042                           | 66119303  | 66119403  | TC0700003433.mm.1  | 0.1  | 0.083454 |
| TC0600001421.mm.1 | ENSMUST00000109069 | Gm14444  | predicted gene 14444                            | 175010241 | 175019248 | TC0200002712.mm.1  | 0.3  | 0.0835   |
| TC0600001422.mm.1 | ENSMUST00000179149 | Gm6660   | predicted gene 6660                             | 55311386  | 55326515  | TC0X00000503.mm.1  | 0.1  | 0.083515 |
| TC0600001424.mm.1 | NM_172993          | Zfp512   | zinc finger protein 512                         | 31452436  | 31481754  | TC0500000321.mm.1  | -0.2 | 0.083557 |
| TC0600001435.mm.1 | NM_024212          | Rpl4     | ribosomal protein L4                            | 64173387  | 64178562  | TC0900000810.mm.1  | -0.4 | 0.083812 |
| TC0600001436.mm.1 | NM_153791          | Flywch1  | FLYWCH-type zinc finger 1                       | 23752797  | 23771591  | TC1700001604.mm.1  | 0.1  | 0.08392  |
| TC0600001437.mm.1 | NM_144897          | Apoa1bp  | apolipoprotein A-I binding protein              | 88056520  | 88058495  | TC0300002297.mm.1  | 0.2  | 0.083962 |
| TC0600001443.mm.1 | ENSMUST00000082996 | Gm23723  | predicted gene, 23723                           | 90126535  | 90126666  | TC03000000781.mm.1 | -0.5 | 0.084033 |
| TC0600001447.mm.1 | ENSMUST00000129517 | Gm16373  | predicted pseudogene 16373                      | 116886881 | 116887183 | TC0X00001161.mm.1  | -0.8 | 0.084085 |
| TC0600001448.mm.1 | ENSMUST00000122611 | Gm26478  | predicted gene, 26478                           | 11087781  | 11087913  | TC0200002951.mm.1  | 0.2  | 0.084136 |
| TC0600001449.mm.1 | NM_025841          | Kdelr2   | KDEL (Lys-Asp-Glu-Leu) endoplasmic reticulum p  | 143403820 | 143421904 | TC0500001732.mm.1  | 0.3  | 0.084172 |
| TC0600001451.mm.1 | NM_001164679       | Ano8     | anoctamin 8                                     | 71476019  | 71486067  | TC0800002428.mm.1  | 0.1  | 0.084187 |
| TC0600001458.mm.1 | NM_001199309       | Gm4559   | predicted gene 4559                             | 142273764 | 142274363 | TC0700004561.mm.1  | -0.2 | 0.084263 |
| TC0600001464.mm.1 | NM_007480          | Arf5     | ADP-ribosylation factor 5                       | 28423560  | 28426602  | TC0600000213.mm.1  | -0.2 | 0.084272 |
| TC0600001465.mm.1 | ENSMUST00000120762 | Gm8172   | predicted pseudogene 8172                       | 69605496  | 69606245  | TC0X00002380.mm.1  | -0.7 | 0.084272 |
| TC0600001480.mm.1 | NM_023514          | Mrps9    | mitochondrial ribosomal protein S9              | 42851233  | 42905683  | TC0100000315.mm.1  | -0.1 | 0.084489 |
| TC0600001483.mm.1 | ENSMUST00000122236 | Gm13776  | predicted gene 13776                            | 91716159  | 91717419  | TC0200004127.mm.1  | -0.1 | 0.084507 |
| TC0600001514.mm.1 | ENSMUST00000101619 | Gm10483  | predicted gene 10483                            | 42526585  | 42529330  | TC0X00000406.mm.1  | -0.3 | 0.084604 |
| TC0600001525.mm.1 | NM_019761          | Nxt1     | NTF2-related export protein 1                   | 148672601 | 148676027 | TC0200002196.mm.1  | -0.1 | 0.084746 |
| TC0600001530.mm.1 | NR_015476          | 1500011  | RIKEN cDNA 1500011K16 gene                      | 127791377 | 127792488 | TC0200004567.mm.1  | 0.2  | 0.084808 |
| TC0600001534.mm.1 | NCBI_Gene:380823:p | Ighv1-6  | immunoglobulin heavy variable 1-64              | 115507545 | 115507977 | TC1200002643.mm.1  | -1.3 | 0.084817 |
| TC0600001536.mm.1 | NM_010669          | Krt6b    | keratin 6B                                      | 101676023 | 101694307 | TC1500002268.mm.1  | -0.3 | 0.084824 |
| TC0600001539.mm.1 | NM_011185          | Psmb1    | proteasome (prosome, macropain) subunit, beta   | 15475721  | 15498277  | TC1700001499.mm.1  | -0.3 | 0.084902 |
| TC0600001540.mm.1 | NM_013603          | Mt3      | metallothionein 3                               | 94152607  | 94154148  | TC0800001093.mm.1  | -0.1 | 0.08496  |
| TC0600001541.mm.1 | ENSMUST00000082983 | Gm22574  | predicted gene, 22574                           | 86044989  | 86045048  | TC1300002383.mm.1  | -0.1 | 0.084962 |
| TC0600001542.mm.1 | ENSMUST00000157618 | Gm25914  | predicted gene, 25914                           | 20173087  | 20173239  | TC0900000162.mm.1  | 0.1  | 0.084996 |
| TC0600001543.mm.1 | NM_178189          | Hist1h2  | histone cluster 1, H2ac                         | 23681467  | 23683959  | TC1300001638.mm.1  | -0.2 | 0.085006 |
| TC0600001544.mm.1 | ENSMUST00000083886 | Gm26316  | predicted gene, 26316                           | 101604850 | 101605040 | TC1100001662.mm.1  | -1.0 | 0.085043 |
| TC0600001545.mm.1 | ENSMUST00000152173 | Gm15692  | predicted gene 15692                            | 78964114  | 78964465  | TC1600000907.mm.1  | -0.2 | 0.085208 |
| TC0600001546.mm.1 | NM_024227          | Mrpl28   | mitochondrial ribosomal protein L28             | 26123503  | 26126613  | TC1700000403.mm.1  | -0.1 | 0.085209 |
| TC0600001547.mm.1 | ENSMUST00000175230 | Gm25931  | predicted gene, 25931                           | 40850320  | 40850402  | TC0400002452.mm.1  | 0.5  | 0.085257 |
| TC0600001552.mm.1 | NM_026609          | Leptrol1 | leptin receptor overlapping transcript-like 1   | 34135572  | 34147033  | TC0800002023.mm.1  | -0.3 | 0.08544  |
| TC0600001556.mm.1 | NCBI_Gene:629884:p | Ighv1-2  | immunoglobulin heavy variable 1-26              | 114788805 | 114788805 | TC1000002617.mm.1  | -1.1 | 0.085543 |
| TC0600001558.mm.1 | NR_039559          | Mir5100  | microRNA 5100                                   | 60728663  | 60728726  | TC1100000761.mm.1  | -0.2 | 0.085549 |
| TC0600001563.mm.1 | NCBI_Gene:277146:p | Trav6d-  | T cell receptor alpha variable 6D-4             | 52753367  | 52753846  | TC1400000625.mm.1  | -0.2 | 0.08555  |
| TC0600001574.mm.1 | ENSMUST00000174907 | Gm23566  | predicted gene, 23566                           | 51765294  | 51765401  | TC1300000606.mm.1  | 0.5  | 0.085616 |
| TC0600001579.mm.1 | NR_028545          | Scarna8  | small Cajal body-specific RNA 8                 | 86586453  | 86586583  | TC0400002978.mm.1  | -0.4 | 0.085877 |
| TC0600001589.mm.1 | ENSMUST00000175387 | Gm24369  | predicted gene, 24369                           | 109951399 | 109951494 | TC1400001230.mm.1  | 0.5  | 0.085896 |
| TC0600001595.mm.1 | ENSMUST00000118050 | Gm15264  | predicted gene 15264                            | 94720023  | 94758116  | TC0300002452.mm.1  | -0.3 | 0.085958 |
| TC0600001602.mm.1 | NM_001113374       | Mocs2    | molybdenum cofactor synthesis 2                 | 114818236 | 114832275 | TC1300001318.mm.1  | 0.1  | 0.086024 |
| TC0600001603.mm.1 | ENSMUST00000169624 | Gm19840  | predicted gene, 19840                           | 22935487  | 22937241  | TC1500000145.mm.1  | -0.2 | 0.08604  |
| TC0600001605.mm.1 | NM_009681          | Ap3s1    | adaptor-related protein complex 3, sigma 1 subu | 46741917  | 46790826  | TC1800000484.mm.1  | -0.5 | 0.086058 |
| TC0600001606.mm.1 | NM_011970          | Psmb2    | proteasome (prosome, macropain) subunit, beta   | 126677630 | 126709715 | TC0400001469.mm.1  | -0.1 | 0.086078 |
| TC0600001607.mm.1 | ENSMUST00000122149 | Gm13050  | predicted gene 13050                            | 143242024 | 143243368 | TC0400003914.mm.1  | -0.5 | 0.086087 |
| TC0600001611.mm.1 | NCBI_Gene:654838:p | Traj2    | T cell receptor alpha joining 2                 | 54217836  | 54217901  | TC1400000739.mm.1  | -0.8 | 0.086194 |
| TC0600001617.mm.1 | ENSMUST00000159498 | Alms1-p  | Alstrom syndrome 1, pseudogene 1                | 85721925  | 85756526  | TC0600000967.mm.1  | -0.1 | 0.086248 |
| TC0600001628.mm.1 | ENSMUST00000116787 | Gm24274  | predicted gene, 24274                           | 67213296  | 67213419  | TC0800002335.mm.1  | 0.2  | 0.086283 |
| TC0600001634.mm.1 | NM_177909          | Slc9a9   | solute carrier family 9 (sodium/hydrogen exchan | 94669892  | 95230452  | TC0900001182.mm.1  | -0.5 | 0.086423 |
| TC0600001639.mm.1 | NM_030262          | Pofut2   | protein O-fucosyltransferase 2                  | 77259233  | 77269586  | TC1000000753.mm.1  | 0.2  | 0.086473 |
| TC0600001647.mm.1 | ENSMUST00000110798 | Gm4204   | predicted gene 4204                             | 135232045 | 135233404 | TC0100001247.mm.1  | -0.3 | 0.086544 |
| TC0600001648.mm.1 | ENSMUST00000157813 | Gm25387  | predicted gene, 25387                           | 27318847  | 27318978  | TC1100002400.mm.1  | 0.2  | 0.086664 |
| TC0600001650.mm.1 | NCBI_Gene:667946:p | Igkv3-3  | immunoglobulin kappa variable 3-3               | 70686946  | 70687534  | TC0600003529.mm.1  | -0.7 | 0.086686 |
| TC0600001652.mm.1 | NM_201359          | Tmem106  | transmembrane protein 106C                      | 97964229  | 97970286  | TC1500000967.mm.1  | 0.1  | 0.086687 |
| TC0600001659.mm.1 | NM_145943          | Sde2     | SDE2 telomere maintenance homolog (S. pombe     | 180851151 | 180868114 | TC0100001720.mm.1  | -0.3 | 0.086733 |
| TC0600001664.mm.1 | NR_029728          | Mirlet7  | microRNA let7c-1                                | 77599652  | 77599759  | TC1600000878.mm.1  | 0.2  | 0.086746 |
| TC0600001696.mm.1 | NM_001099634       | Myof     | myoferlin                                       | 37899036  | 38043577  | TC1900001461.mm.1  | 0.3  | 0.086879 |
| TC0600001717.mm.1 | ENSMUST00000121648 | Gm6067   | predicted gene 6067                             | 142405951 | 142406441 | TC0X00003101.mm.1  | -0.3 | 0.086941 |
| TC0600001721.mm.1 | ENSMUST00000116740 | Gm23784  | predicted gene, 23784                           | 93052583  | 93052672  | TC0300000840.mm.1  | 0.4  | 0.086951 |
| TC0600001729.mm.1 | ENSMUST00000158779 | Gm24877  | predicted gene, 24877                           | 94958778  | 94958893  | TC1100001449.mm.1  | 0.2  | 0.087084 |
| TC0600001736.mm.1 | ENSMUST00000083889 | n-R5s18  | nuclear encoded rRNA 5S 182                     | 12812706  | 12812812  | TC0400000113.mm.1  | 0.3  | 0.087225 |
| TC0600001741.mm.1 | NM_015781          | Nap1l1   | nucleosome assembly protein 1-like 1            | 111473192 | 111498150 | TC1000001298.mm.1  | -0.2 | 0.087239 |
| TC0600001744.mm.1 | NM_026330          | Nsmce1   | non-SMC element 1 homolog (S. cerevisiae)       | 125467640 | 125491596 | TC0700004258.mm.1  | -0.2 | 0.087239 |
| TC0600001745.mm.1 | ENSMUST00000158208 | Gm23542  | predicted gene, 23542                           | 10511370  | 10511465  | TC0200000191.mm.1  | 0.2  | 0.087311 |
| TC0600001747.mm.1 | NM_007557          | Bmp7     | bone morphogenetic protein 7                    | 172868012 | 172940321 | TC0200005281.mm.1  | -0.2 | 0.087349 |
| TC0600001754.mm.1 | NM_001081049       | Kmt2a    | lysine (K)-specific methyltransferase 2A        | 44803355  | 44881296  | TC0900002181.mm.1  | -0.3 | 0.087449 |
| TC0600001767.mm.1 | NM_194339          | Bms1     | BMS1 homolog, ribosome assembly protein (yea    | 118383381 | 118419417 | TC0600003000.mm.1  | -0.2 | 0.087585 |
| TC0600001768.mm.1 | ENSMUST00000103960 | Gm22935  | predicted gene, 22935                           | 89097910  | 89098013  | TC0300002335.mm.1  | -0.2 | 0.087587 |
| TC0600001772.mm.1 | NM_148926          | Zfand3   | zinc finger, AN1-type domain 3                  | 30005087  | 30210020  | TC1700000513.mm.1  | 0.2  | 0.087641 |
| TC0600001778.mm.1 | NM_009663          | Alox5ap  | arachidonate 5-lipoxygenase activating protein  | 149265058 | 149288047 | TC0500001844.mm.1  | 0.4  | 0.08775  |
| TC0600001779.mm.1 | ENSMUST00000178786 | Gm25360  | predicted gene, 25360                           | 72226240  | 72226430  | TC0100000596.mm.1  | -1.0 | 0.087825 |

|                   |                    |         |                                                 |           |           |                   |      |          |
|-------------------|--------------------|---------|-------------------------------------------------|-----------|-----------|-------------------|------|----------|
| TC0600001787.mm.1 | ENSMUST00000118650 | Gm6767  | predicted gene 6767                             | 51362452  | 51363832  | TC1600001716.mm.1 | -0.5 | 0.087869 |
| TC0600001788.mm.1 | NM_026539          | Chd1l   | chromodomain helicase DNA binding protein 1-l   | 97560740  | 97610203  | TC0300002541.mm.1 | -0.2 | 0.087872 |
| TC0600001813.mm.1 | NM_010764          | Man2b1  | mannosidase 2, alpha B1                         | 85083269  | 85098739  | TC0800000983.mm.1 | 0.4  | 0.087954 |
| TC0600001819.mm.1 | NM_023721          | Atp6v1d | ATPase, H+ transporting, lysosomal V1 subunit D | 78842982  | 78861638  | TC1200001971.mm.1 | -0.3 | 0.087961 |
| TC0600001821.mm.1 | NM_007680          | Ephb6   | Eph receptor B6                                 | 41605482  | 41620509  | TC0600000444.mm.1 | -0.3 | 0.087991 |
| TC0600001824.mm.1 | ENSMUST00000175075 | Gm23637 | predicted gene, 23637                           | 9827026   | 9827119   | TC1800000967.mm.1 | 0.5  | 0.087993 |
| TC0600001834.mm.1 | NM_025525          | Rnf113a | ring finger protein 113A2                       | 84417194  | 84418578  | TC1200000811.mm.1 | -0.1 | 0.088335 |
| TC0600001835.mm.1 | NCBI_Gene:668474:p | Ighv1-7 | immunoglobulin heavy variable V1-7              | 114538495 | 114538928 | TC1200002604.mm.1 | -0.9 | 0.088433 |
| TC0600001837.mm.1 | NM_010617          | Kif13a  | kinesin family member 13A                       | 46749087  | 46929718  | TC1300001922.mm.1 | 0.1  | 0.088474 |
| TC0600001842.mm.1 | NM_206869          | Vmn1r18 | vomeronasal 1 receptor 180                      | 23952387  | 23953356  | TC0700000362.mm.1 | 0.2  | 0.088492 |
| TC0600001849.mm.1 | ENSMUST00000178432 | Gm11008 | predicted gene 11008                            | 176097450 | 176100706 | TC0200002732.mm.1 | 0.6  | 0.088512 |
| TC0600001852.mm.1 | ENSMUST00000120170 | Gm11526 | predicted gene 11526                            | 95761491  | 95761665  | TC1100001473.mm.1 | -0.3 | 0.08853  |
| TC0600001856.mm.1 | ENSMUST00000158435 | Gm22361 | predicted gene, 22361                           | 116448389 | 116448564 | TC0300002805.mm.1 | 0.1  | 0.088631 |
| TC0600001859.mm.1 | NM_001146708       | Fas     | Fas (TNF receptor superfamily member 6)         | 34290659  | 34327770  | TC1900000497.mm.1 | -0.4 | 0.088759 |
| TC0600001862.mm.1 | NM_001101598       | Isoc2a  | isochorismatase domain containing 2a            | 4877053   | 4895717   | TC0700000047.mm.1 | 0.4  | 0.08877  |
| TC0600001871.mm.1 | XM_003689120       | Gm21111 | predicted gene, 21111                           | 75539578  | 75541911  | TC0Y00000473.mm.1 | 0.2  | 0.088831 |
| TC0600001897.mm.1 | NM_001162506       | Troap   | trophinin associated protein                    | 99074575  | 99083409  | TC1500001005.mm.1 | -0.2 | 0.088854 |
| TC0600001909.mm.1 | NM_024460          | Ost4    | oligosaccharyltransferase 4 homolog (S. cerevis | 30905885  | 30907788  | TC0500002167.mm.1 | 0.3  | 0.088877 |
| TC0600001924.mm.1 | ENSMUST00000121511 | Gm14460 | predicted gene 14460                            | 78512698  | 78513336  | TC0200003820.mm.1 | -0.4 | 0.088888 |
| TC0600001926.mm.1 | NM_009985          | Ctsw    | cathepsin W                                     | 5465240   | 5468498   | TC1900000967.mm.1 | -0.2 | 0.088931 |
| TC0600001927.mm.1 | NM_016742          | Cdc37   | cell division cycle 37                          | 21138541  | 21149929  | TC0900001859.mm.1 | -0.2 | 0.088977 |
| TC0600001928.mm.1 | NM_001177400       | Etoh1l  | ethanol induced 1                               | 178023284 | 178035859 | TC0200002755.mm.1 | 0.6  | 0.089046 |
| TC0600001938.mm.1 | NM_001162884       | Igsf10  | immunoglobulin superfamily, member 10           | 59316735  | 59344256  | TC0300002056.mm.1 | 0.3  | 0.08905  |
| TC0600001940.mm.1 | NM_001039353       | Nolc1   | nucleolar and coiled-body phosphoprotein 1      | 46075847  | 46085543  | TC1900000683.mm.1 | -0.3 | 0.089082 |
| TC0600001948.mm.1 | ENSMUST00000121678 | Gm13356 | predicted gene 13356                            | 22762744  | 22763078  | TC0200003094.mm.1 | -0.2 | 0.089111 |
| TC0600001950.mm.1 | ENSMUST00000169120 | Gm8164  | predicted gene 8164                             | 4577811   | 4579002   | TC1400001379.mm.1 | -0.2 | 0.089201 |
| TC0600001966.mm.1 | NM_020520          | Slc25a2 | solute carrier family 25 (mitochondrial carniti | 108662098 | 108684641 | TC0900001418.mm.1 | 0.5  | 0.089361 |
| TC0600001969.mm.1 | NM_001081077       | Cwf19l1 | CWF19-like 1, cell cycle control (S. pombe)     | 44108637  | 44135876  | TC1900001553.mm.1 | -0.2 | 0.089367 |
| TC0600001971.mm.1 | NM_030074          | Zfp687  | zinc finger protein 687                         | 95006590  | 95015448  | TC0300002460.mm.1 | -0.1 | 0.089413 |
| TC0600001974.mm.1 | NM_010273          | Gdi1    | guanosine diphosphate (GDP) dissociation inhibi | 74304998  | 74311867  | TC0X00000709.mm.1 | 0.3  | 0.089414 |
| TC0600001982.mm.1 | XM_889722          | Gm5621  | predicted gene 5621                             | 105560061 | 105560797 | TC0900002993.mm.1 | -0.4 | 0.089421 |
| TC0600002015.mm.1 | NM_020270          | Scamp5  | secretory carrier membrane protein 5            | 57441327  | 57468024  | TC0900002369.mm.1 | 0.2  | 0.08949  |
| TC0600002020.mm.1 | BC115520           | Fam57a  | family with sequence similarity 57, member A    | 76179671  | 76215293  | TC1100001095.mm.1 | -0.1 | 0.089563 |
| TC0600002044.mm.1 | NM_010145          | Ephx1   | epoxide hydrolase 1, microsomal                 | 180976155 | 181020904 | TC0100003679.mm.1 | 0.4  | 0.089568 |
| TC0600002053.mm.1 | NM_011862          | Pacsin2 | protein kinase C and casein kinase substrate in | 83375607  | 83464606  | TC1500001973.mm.1 | 0.2  | 0.089689 |
| TC0600002066.mm.1 | ENSMUST00000120467 | Gm13537 | predicted gene 13537                            | 33323171  | 33323437  | TC0200000604.mm.1 | -0.4 | 0.08972  |
| TC0600002071.mm.1 | NM_026634          | A930018 | RIKEN cDNA A930018P22 gene                      | 104122769 | 104124749 | TC0200001553.mm.1 | 0.1  | 0.089778 |
| TC0600002119.mm.1 | NM_018739          | Rp9     | retinitis pigmentosa 9 (human)                  | 22448311  | 22468356  | TC0900001910.mm.1 | -0.3 | 0.089838 |
| TC0600002121.mm.1 | NM_019668          | Ube2a   | ubiquitin-conjugating enzyme E2A                | 36874358  | 36884222  | TC0X00000329.mm.1 | -0.2 | 0.089907 |
| TC0600002133.mm.1 | ENSMUST00000109141 | Gm15427 | predicted pseudogene 15427                      | 95498584  | 95499187  | TC0100000959.mm.1 | -0.6 | 0.089927 |
| TC0600002137.mm.1 | NM_009178          | St3gal4 | ST3 beta-galactoside alpha-2,3-sialyltransferas | 35046579  | 35116810  | TC0900002003.mm.1 | 0.1  | 0.090051 |
| TC0600002140.mm.1 | NM_007781          | Csf2rb2 | colony stimulating factor 2 receptor, beta 2, l | 78282508  | 78305721  | TC1500001828.mm.1 | 0.2  | 0.090135 |
| TC0600002151.mm.1 | ENSMUST00000175183 | Gm24560 | predicted gene, 24560                           | 46195379  | 46195486  | TC0400002592.mm.1 | 0.3  | 0.090163 |
| TC0600002154.mm.1 | ENSMUST00000157700 | Gm25668 | predicted gene, 25668                           | 98069752  | 98069880  | TC1500000968.mm.1 | 0.2  | 0.090166 |
| TC0600002157.mm.1 | NCBI_Gene:628144:p | Igkv9-1 | immunoglobulin kappa variable 9-123             | 67954228  | 67954690  | TC0600003543.mm.1 | -0.4 | 0.090242 |
| TC0600002168.mm.1 | NM_008716          | Notch3  | notch 3                                         | 32120820  | 32166880  | TC1700001834.mm.1 | 0.1  | 0.090272 |
| TC0600002173.mm.1 | ENSMUST00000059546 | Rpsa-ps | ribosomal protein SA, pseudogene 2              | 128776742 | 128777251 | TC1000003162.mm.1 | -0.6 | 0.090281 |
| TC0600002181.mm.1 | NM_008764          | Tnfrsf1 | tumor necrosis factor receptor superfamily, men | 54250619  | 54278484  | TC1500001528.mm.1 | 0.1  | 0.090285 |
| TC0600002183.mm.1 | ENSMUST00000038304 | Gm6781  | predicted gene 6781                             | 18531363  | 18532460  | TC1400000145.mm.1 | 0.3  | 0.090327 |
| TC0600002193.mm.1 | NM_133800          | Nol12   | nucleolar protein 12                            | 78934933  | 78943634  | TC1500000659.mm.1 | -0.1 | 0.090352 |
| TC0600002194.mm.1 | ENSMUST00000116776 | Gm24834 | predicted gene, 24834                           | 68698201  | 68698288  | TC1500001669.mm.1 | 0.5  | 0.090382 |
| TC0600002210.mm.1 | NCBI_Gene:780960:p | Ighv8-1 | immunoglobulin heavy variable V8-12             | 115647945 | 115648361 | TC1200002647.mm.1 | -1.0 | 0.090498 |
| TC0600002211.mm.1 | NM_001160304       | Gm4788  | predicted gene 4788                             | 139697635 | 139781239 | TC0100003190.mm.1 | 0.4  | 0.090612 |
| TC0600002212.mm.1 | NCBI_Gene:193587:p | Trav8-2 | Trav8-2 T-cell receptor alpha variable 8-2      | 53738302  | 53741038  | TC1400002828.mm.1 | -0.2 | 0.09062  |
| TC0600002213.mm.1 | NM_024221          | Pdhb    | pyruvate dehydrogenase (lipoamide) beta         | 8165991   | 8172992   | TC1400001436.mm.1 | 0.4  | 0.090648 |
| TC0600002216.mm.1 | ENSMUST00000103862 | Gm24544 | predicted gene, 24544                           | 73146849  | 73146958  | TC0300000599.mm.1 | -0.1 | 0.09065  |
| TC0600002223.mm.1 | NM_029976          | Cdkn2ai | CDKN2A interacting protein N-terminal like      | 51967631  | 51977336  | TC1100000582.mm.1 | -0.4 | 0.090711 |
| TC0600002225.mm.1 | NM_030557          | Mynn    | myoneurin                                       | 30602087  | 30619873  | TC0300000199.mm.1 | -0.1 | 0.090764 |
| TC0600002233.mm.1 | ENSMUST00000158313 | Gm22989 | predicted gene, 22989                           | 49788284  | 49788369  | TC1400000547.mm.1 | 0.3  | 0.090801 |
| TC0600002237.mm.1 | ENSMUST00000119956 | Gm11573 | predicted gene 11573                            | 97096933  | 97097326  | TC1100001532.mm.1 | -0.1 | 0.090802 |
| TC0600002243.mm.1 | ENSMUST00000121383 | Gm12870 | predicted gene 12870                            | 107327484 | 107328499 | TC0400003220.mm.1 | -0.2 | 0.09086  |
| TC0600002253.mm.1 | NM_008043          | Frat1   | frequently rearranged in advanced T cell lympho | 41829970  | 41832583  | TC1900000598.mm.1 | -0.1 | 0.090865 |
| TC0600002269.mm.1 | ENSMUST00000121864 | Gm14048 | predicted gene 14048                            | 130880866 | 130882133 | TC0200001997.mm.1 | -0.3 | 0.090885 |
| TC0600002279.mm.1 | NM_025827          | Lonp2   | lon peptidase 2, peroxisomal                    | 86624043  | 86723873  | TC0800001003.mm.1 | 0.3  | 0.090899 |
| TC0600002280.mm.1 | NM_001113478       | Frrs1   | ferric-chelate reductase 1                      | 116859567 | 116903750 | TC0300001198.mm.1 | 0.3  | 0.090978 |
| TC0600002307.mm.1 | ENSMUST00000082395 | mt-Tm   | mitochondrially encoded tRNA methionine         | 3845      | 5016      | TC0M00000005.mm.1 | 0.4  | 0.090989 |
| TC0600002323.mm.1 | NM_172685          | Slc25a2 | solute carrier family 25 (mitochondrial carrier | 109123149 | 109168457 | TC0300001159.mm.1 | 0.3  | 0.091219 |
| TC0600002326.mm.1 | NM_001081353       | 2210408 | RIKEN cDNA 2210408I21 gene                      | 77135536  | 77613679  | TC1300000934.mm.1 | 0.1  | 0.091261 |
| TC0600002328.mm.1 | NM_007383          | Acads   | acyl-Coenzyme A dehydrogenase, short chain      | 115110299 | 115119346 | TC0500003088.mm.1 | 0.2  | 0.091354 |
| TC0600002335.mm.1 | NR_029555          | Mir142  | microRNA 142                                    | 87756864  | 87756927  | TC1100001351.mm.1 | -0.4 | 0.091407 |
| TC0600002336.mm.1 | NM_080558          | Ssfa2   | sperm specific antigen 2                        | 79635352  | 79672966  | TC0200001164.mm.1 | 0.2  | 0.091606 |
| TC0600002346.mm.1 | NM_001081984       | Popdc2  | popeye domain containing 2                      | 38362173  | 38378216  | TC1600002171.mm.1 | 0.1  | 0.091688 |
| TC0600002355.mm.1 | ENSMUST00000158917 | Gm25835 | predicted gene, 25835                           | 69668852  | 69668995  | TC1100003057.mm.1 | -1.1 | 0.091726 |
| TC0600002356.mm.1 | NM_026441          | Pef1    | penta-EF hand domain containing 1               | 130102558 | 130128138 | TC0400001541.mm.1 | 0.2  | 0.091748 |
| TC0600002357.mm.1 | NM_016978          | Oat     | ornithine aminotransferase                      | 132557475 | 132576398 | TC0700004409.mm.1 | 0.4  | 0.091795 |
| TC0600002358.mm.1 | ENSMUST00000086606 | Gm10713 | predicted pseudogene 10713                      | 40006220  | 40006555  | TC1400000404.mm.1 | -0.3 | 0.091855 |
| TC0600002362.mm.1 | ENSMUST00000019980 | Amd-ps4 | S-adenosylmethionine decarboxylase, pseudoge    | 51253025  | 51254145  | TC0400002650.mm.1 | -1.0 | 0.091857 |
| TC0600002365.mm.1 | NM_007930          | Enc1    | ectodermal-neural cortex 1                      | 97241105  | 97253040  | TC1300001100.mm.1 | 0.1  | 0.091909 |

|                   |                     |         |                                                  |           |           |                    |      |          |
|-------------------|---------------------|---------|--------------------------------------------------|-----------|-----------|--------------------|------|----------|
| TC0600002380.mm.1 | ENSMUST00000110441  | Gm11042 | predicted gene 11042                             | 74315110  | 74316394  | TC1200001926.mm.1  | 0.5  | 0.091929 |
| TC0600002385.mm.1 | ENSMUST00000157599  | Gm25406 | predicted gene, 25406                            | 73193912  | 73194016  | TC1700001151.mm.1  | 0.2  | 0.091959 |
| TC0600002388.mm.1 | NM_001172136        | Exog    | endo/exonuclease (5-3), endonuclease G-like      | 119444923 | 119465518 | TC0900001582.mm.1  | -0.1 | 0.092007 |
| TC0600002390.mm.1 | NM_009593           | Abcg1   | ATP-binding cassette, sub-family G (WHITE), mer  | 31057694  | 31117984  | TC1700000528.mm.1  | -0.4 | 0.092092 |
| TC0600002409.mm.1 | NM_153405           | Rbm45   | RNA binding motif protein 45                     | 76369984  | 76383768  | TC0200001125.mm.1  | -0.2 | 0.092215 |
| TC0600002410.mm.1 | NM_011326           | Scnn1g  | sodium channel, nonvoltage-gated 1 gamma         | 121734479 | 121768477 | TC0700001746.mm.1  | -0.2 | 0.092246 |
| TC0600002420.mm.1 | NM_139143           | Slc39a6 | solute carrier family 39 (metal ion transporter) | 24579881  | 24603817  | TC1800001083.mm.1  | -0.3 | 0.092265 |
| TC0600002422.mm.1 | ENSMUST000000091117 | Gm5537  | predicted gene 5537                              | 58102609  | 58104269  | TC0300002040.mm.1  | -0.4 | 0.092335 |
| TC0600002423.mm.1 | ENSMUST00000119791  | Gm12620 | predicted gene 12620                             | 60682179  | 60684164  | TC1100002892.mm.1  | -0.1 | 0.092363 |
| TC0600002424.mm.1 | ENSMUST00000119837  | Gm11539 | predicted gene 11539                             | 96248633  | 96249189  | TC1100001489.mm.1  | -0.8 | 0.09241  |
| TC0600002425.mm.1 | NM_153505           | Nckap1l | NCK associated protein 1 like                    | 103453825 | 103498800 | TC1500001131.mm.1  | -0.6 | 0.092587 |
| TC0600002427.mm.1 | NM_029578           | Tgds    | TDP-glucose 4,6-dehydratase                      | 118111911 | 118132765 | TC1400002711.mm.1  | -0.1 | 0.092622 |
| TC0600002430.mm.1 | NM_175362           | Card11  | caspase recruitment domain family, member 11     | 140872990 | 141000596 | TC0500003518.mm.1  | -0.4 | 0.092734 |
| TC0600002431.mm.1 | ENSMUST00000150411  | Gm10167 | predicted pseudogene 10167                       | 148182899 | 148184377 | TC0500003635.mm.1  | -0.3 | 0.092918 |
| TC0600002432.mm.1 | NM_001101516        | Gpr25   | G protein-coupled receptor 25                    | 136258914 | 136260873 | TC0100003145.mm.1  | -0.1 | 0.092931 |
| TC0600002442.mm.1 | NM_199308           | Mast3   | microtubule associated serine/threonine kinase   | 70778117  | 70796988  | TC0800002405.mm.1  | -0.2 | 0.093103 |
| TC0600002444.mm.1 | NM_176993           | Mpz13   | myelin protein zero-like 3                       | 45055181  | 45077437  | TC0900000532.mm.1  | -0.1 | 0.093117 |
| TC0600002445.mm.1 | NR_028556           | Snord92 | small nucleolar RNA, C/D box 92                  | 71631279  | 71631365  | TC1700001139.mm.1  | -0.4 | 0.093119 |
| TC0600002446.mm.1 | NM_026298           | lft172  | intraflagellar transport 172                     | 31253279  | 31291114  | TC0500002182.mm.1  | 0.1  | 0.093235 |
| TC0600002447.mm.1 | NM_013765           | Rps26   | ribosomal protein S26                            | 128624529 | 128626506 | TC1000003155.mm.1  | -0.6 | 0.093249 |
| TC0600002448.mm.1 | ENSMUST00000169610  | Gm3344  | predicted gene 3344                              | 5610194   | 5613188   | TC1400001398.mm.1  | 0.1  | 0.093262 |
| TC0600002449.mm.1 | ENSMUST00000157759  | Gm24690 | predicted gene, 24690                            | 38356578  | 38356674  | TC1800000400.mm.1  | 0.2  | 0.093278 |
| TC0600002450.mm.1 | NM_145395           | Duoxa1  | dual oxidase maturation factor 1                 | 122302191 | 122313730 | TC0200004507.mm.1  | 0.2  | 0.093382 |
| TC0600002452.mm.1 | ENSMUST00000105073  | Gm14190 | predicted gene 14190                             | 99690588  | 99690740  | TC1100003731.mm.1  | -0.3 | 0.093408 |
| TC0600002458.mm.1 | NM_011330           | Ccl11   | chemokine (C-C motif) ligand 11                  | 82057823  | 82062955  | TC1100001221.mm.1  | 0.5  | 0.093547 |
| TC0600002460.mm.1 | NCBI_Gene:619916:p  | Ighv1-7 | immunoglobulin heavy variable 1-72               | 115757984 | 115758416 | TC1200002650.mm.1  | -0.9 | 0.09355  |
| TC0600002472.mm.1 | ENSMUST00000174978  | Gm22859 | predicted gene, 22859                            | 128925571 | 128925692 | TC0200004585.mm.1  | 0.3  | 0.093558 |
| TC0600002475.mm.1 | ENSMUST00000120607  | Gm13525 | predicted gene 13525                             | 49680499  | 49680976  | TC0200000802.mm.1  | -0.4 | 0.093603 |
| TC0600002480.mm.1 | NM_134218           | Vmn1r20 | vomeronasal 1 receptor 208                       | 22772327  | 22773325  | TC1300001602.mm.1  | 0.2  | 0.093739 |
| TC0600002484.mm.1 | ENSMUST00000090043  | Gm9864  | predicted gene 9864                              | 107595630 | 107600539 | TC0200004287.mm.1  | -0.6 | 0.09387  |
| TC0600002487.mm.1 | ENSMUST00000083229  | Gm22169 | predicted gene, 22169                            | 68461339  | 68461445  | TC0900002569.mm.1  | -0.7 | 0.094    |
| TC0600002492.mm.1 | NR_030269           | Mir494  | microRNA 494                                     | 109715318 | 109715402 | TC1200001174.mm.1  | 0.3  | 0.094057 |
| TC0600002504.mm.1 | NM_177622           | Zfp595  | zinc finger protein 595                          | 67312998  | 67332560  | TC1300002772.mm.1  | -0.1 | 0.094078 |
| TC0600002506.mm.1 | ENSMUST00000071842  | Gm5828  | predicted gene 5828                              | 16768270  | 16770138  | TC0100002011.mm.1  | -0.1 | 0.094155 |
| TC0600002511.mm.1 | ENSMUST00000116751  | Gm23653 | predicted gene, 23653                            | 48506964  | 48507060  | TC0900002238.mm.1  | 0.2  | 0.094232 |
| TC0600002512.mm.1 | NM_138952           | Ripk2   | receptor (TNFRSF)-interacting serine-threonine   | 16122733  | 16163647  | TC0400002251.mm.1  | 0.1  | 0.094281 |
| TC0600002517.mm.1 | ENSMUST00000158640  | Gm22888 | predicted gene, 22888                            | 41203057  | 41203133  | TC0400002461.mm.1  | -0.3 | 0.094337 |
| TC0600002518.mm.1 | NM_001168334        | Gm2799  | predicted gene 2799                              | 32278394  | 32562009  | TC0X00000279.mm.1  | 0.1  | 0.094345 |
| TC0600002536.mm.1 | NM_001177406        | Gm14431 | predicted gene 14431                             | 176521004 | 176533821 | TC0200002738.mm.1  | 0.6  | 0.094546 |
| TC0600002543.mm.1 | OTTMUST00000086224  | RP23-29 | ---                                              | 175690881 | 175703698 | TC0200005341.mm.1  | 0.6  | 0.094546 |
| TC0600002554.mm.1 | NM_011093           | Pira6   | paired-Ig-like receptor A6                       | 4274143   | 4282928   | TC07000003030.mm.1 | 0.3  | 0.094561 |
| TC0600002555.mm.1 | ENSMUST00000121152  | Gm14633 | predicted gene 14633                             | 56447888  | 56448357  | TC0X00002263.mm.1  | -0.5 | 0.094565 |
| TC0600002558.mm.1 | NM_001242944        | Gm14306 | predicted gene 14306                             | 176670522 | 176681090 | TC0200005489.mm.1  | 0.5  | 0.094571 |
| TC0600002561.mm.1 | ENSMUST00000180137  | Gm23143 | predicted gene, 23143                            | 117202528 | 117202643 | TC0400001283.mm.1  | -1.1 | 0.094606 |
| TC0600002573.mm.1 | ENSMUST00000104671  | Gm25567 | predicted gene, 25567                            | 16168953  | 16169041  | TC1800001022.mm.1  | 0.4  | 0.094649 |
| TC0600002581.mm.1 | NM_146240           | Rassf9  | Ras association (RalGDS/AF-6) domain family (N-  | 102512222 | 102546560 | TC1000001239.mm.1  | 0.2  | 0.094695 |
| TC0600002585.mm.1 | ENSMUST00000158334  | Gm24947 | predicted gene, 24947                            | 125884415 | 125884524 | TC0600001465.mm.1  | -0.1 | 0.094819 |
| TC0600002586.mm.1 | NM_009082           | Rpl29   | ribosomal protein L29                            | 106429454 | 106431568 | TC0900001347.mm.1  | -0.4 | 0.09484  |
| TC0600002592.mm.1 | NM_001205188        | Ppp2r2a | protein phosphatase 2 (formerly 2A), regulatory  | 67014056  | 67072471  | TC1400002283.mm.1  | -0.3 | 0.094871 |
| TC0600002605.mm.1 | ENSMUST00000175212  | Gm26217 | predicted gene, 26217                            | 5127632   | 5127715   | TC0700002187.mm.1  | -0.2 | 0.094888 |
| TC0600002615.mm.1 | NM_001017959        | Lamp2   | lysosomal-associated membrane protein 2          | 38401357  | 38456455  | TC0X00002085.mm.1  | 0.3  | 0.095002 |
| TC0600002616.mm.1 | NCBI_Gene:546213:p  | Igkv4-5 | immunoglobulin kappa variable 4-53               | 69648824  | 69649354  | TC0600003573.mm.1  | -1.0 | 0.095198 |
| TC0600002627.mm.1 | ENSMUST00000120348  | Gm12123 | predicted gene 12123                             | 35323199  | 35323670  | TC1100002508.mm.1  | -0.4 | 0.095385 |
| TC0600002639.mm.1 | NM_010588           | Jag2    | jagged 2                                         | 112908590 | 112929495 | TC1200002443.mm.1  | -0.1 | 0.095394 |
| TC0600002640.mm.1 | ENSMUST00000069552  | Gm5160  | predicted gene 5160                              | 14424868  | 14425311  | TC1800000119.mm.1  | -0.2 | 0.095407 |
| TC0600002644.mm.1 | ENSMUST00000174973  | Gm22854 | predicted gene, 22854                            | 18460210  | 18460293  | TC0900001803.mm.1  | 0.5  | 0.095526 |
| TC0600002656.mm.1 | NM_007665           | Cdh3    | cadherin 3                                       | 106510852 | 106556911 | TC0800001253.mm.1  | -0.1 | 0.095623 |
| TC0600002658.mm.1 | NM_025933           | Higd2a  | HIG1 domain family, member 2A                    | 54590207  | 54591158  | TC1300000633.mm.1  | 0.5  | 0.09567  |
| TC0600002662.mm.1 | NM_139063           | Bloc1s5 | biogenesis of organelles complex-1, subunit 5,   | 38602698  | 38635109  | TC1300001836.mm.1  | 0.1  | 0.095759 |
| TC0600002666.mm.1 | NM_001146120        | Psap    | prosaposin                                       | 60277627  | 60302600  | TC1000000547.mm.1  | 0.5  | 0.09576  |
| TC0600002670.mm.1 | NM_138598           | Fam104a | family with sequence similarity 104, member A    | 113661329 | 113684155 | TC1100004035.mm.1  | -0.1 | 0.095949 |
| TC0600002680.mm.1 | NM_010635           | Klf1    | Kruppel-like factor 1 (erythroid)                | 84901928  | 84905295  | TC0800000971.mm.1  | 0.1  | 0.096004 |
| TC0600002681.mm.1 | ENSMUST00000158782  | Gm24878 | predicted gene, 24878                            | 36666409  | 36666512  | TC0500002260.mm.1  | 0.2  | 0.096031 |
| TC0600002688.mm.1 | NM_010295           | Gclc    | glutamate-cysteine ligase, catalytic subunit     | 77754535  | 77794489  | TC0900001038.mm.1  | -0.2 | 0.096054 |
| TC0600002690.mm.1 | ENSMUST00000158325  | Gm24939 | predicted gene, 24939                            | 59813137  | 59813273  | TC1100000737.mm.1  | 0.2  | 0.096146 |
| TC0600002694.mm.1 | ENSMUST00000172589  | Vmn2r-p | vomeronasal 2, receptor, pseudogene 36           | 7417668   | 7441299   | TC0700002232.mm.1  | 0.1  | 0.096195 |
| TC0600002698.mm.1 | NM_001290011        | Pemt    | phosphatidylethanolamine N-methyltransferase     | 0         | 0         | TSUnmapped0000003  | 0.2  | 0.096234 |
| TC0600002705.mm.1 | ENSMUST00000175232  | Gm25071 | predicted gene, 25071                            | 80925736  | 80925805  | TC1800001669.mm.1  | 0.5  | 0.096315 |
| TC0600002719.mm.1 | ENSMUST00000117628  | Gm13135 | predicted gene 13135                             | 147275976 | 147279096 | TC0400001903.mm.1  | -0.2 | 0.096319 |
| TC0600002721.mm.1 | ENSMUST00000082788  | Gm25857 | predicted gene, 25857                            | 119740828 | 119740956 | TC0000004445.mm.1  | -0.4 | 0.096397 |
| TC0600002728.mm.1 | BC058537            | Ikzf5   | IKAROS family zinc finger 5                      | 131388649 | 131410521 | TC0700004399.mm.1  | -0.2 | 0.096413 |
| TC0600002730.mm.1 | NM_001198833        | Ddr1    | discoordin domain receptor family, member 1      | 35681567  | 35704621  | TC1700001976.mm.1  | 0.1  | 0.096542 |
| TC0600002757.mm.1 | NM_001025312        | Dclre1b | DNA cross-link repair 1B, PSO2 homolog (S. cere  | 103800605 | 103809444 | TC0300002633.mm.1  | -0.2 | 0.09659  |
| TC0600002759.mm.1 | NM_175092           | Rhof    | ras homolog gene family, member f                | 123103044 | 123132692 | TC0500003225.mm.1  | -0.1 | 0.096592 |
| TC0600002763.mm.1 | NM_153570           | Noc4l   | nucleolar complex associated 4 homolog (S. cere  | 110648418 | 110653417 | TC0500002993.mm.1  | -0.1 | 0.096645 |
| TC0600002773.mm.1 | ENSMUST00000122157  | Gm12634 | predicted gene 12634                             | 90368731  | 90369722  | TC0400000921.mm.1  | -0.2 | 0.096713 |
| TC0600002776.mm.1 | NM_020026           | B3galnt | UDP-GalNAc:betaGlcNAc beta 1,3-galactosaminy     | 69573919  | 69598960  | TC0300002139.mm.1  | 0.1  | 0.096723 |
| TC0600002780.mm.1 | NM_153088           | Ctdsp1  | CTD (carboxy-terminal domain, RNA polymerase     | 74391509  | 74397285  | TC0100000633.mm.1  | 0.2  | 0.096938 |

|                   |                     |         |                                                 |           |           |                   |      |          |
|-------------------|---------------------|---------|-------------------------------------------------|-----------|-----------|-------------------|------|----------|
| TC0600002783.mm.1 | NR_035412           | Mir466i | microRNA 466i                                   | 17747473  | 17747593  | TC1300000124.mm.1 | 0.3  | 0.096968 |
| TC0600002793.mm.1 | ENSMUST00000118921  | Gm11877 | predicted gene 11877                            | 19298333  | 19299184  | TC0400000163.mm.1 | -0.2 | 0.097026 |
| TC0600002796.mm.1 | NM_001166634        | Gm4302  | predicted gene 4302                             | 100340836 | 100341762 | TC1000001223.mm.1 | -0.2 | 0.097062 |
| TC0600002798.mm.1 | NM_172694           | Megf9   | multiple EGF-like-domains 9                     | 70427065  | 70534995  | TC0400002849.mm.1 | 0.3  | 0.097094 |
| TC0600002806.mm.1 | NM_025928           | Pmf1    | polyamine-modulated factor 1                    | 88394138  | 88410316  | TC0300002310.mm.1 | -0.2 | 0.097155 |
| TC0600002807.mm.1 | NM_019696           | Cpxm1   | carboxypeptidase X 1 (M14 family)               | 130390775 | 130397629 | TC0200004623.mm.1 | 0.3  | 0.097199 |
| TC0600002811.mm.1 | NM_025370           | Aaed1   | AhpC/TSA antioxidant enzyme domain containin    | 64291836  | 64312710  | TC1300002201.mm.1 | 0.2  | 0.097341 |
| TC0600002813.mm.1 | NM_010422           | Hexb    | hexosaminidase B                                | 97176331  | 97183357  | TC1300002481.mm.1 | -0.3 | 0.097357 |
| TC0600002823.mm.1 | NM_011309           | S100a1  | S100 calcium binding protein A1                 | 90511034  | 90514392  | TC0300002374.mm.1 | 0.4  | 0.097403 |
| TC0600002837.mm.1 | NM_020205           | Slc5a7  | solute carrier family 5 (choline transporter),  | 54273590  | 54299034  | TC1700002293.mm.1 | 0.4  | 0.097415 |
| TC0600002845.mm.1 | ENSMUST00000157737  | Gm23498 | predicted gene, 23498                           | 145366858 | 145366944 | TC0600001717.mm.1 | 0.2  | 0.097417 |
| TC0600002853.mm.1 | ENSMUST00000106581  | Cd300lb | CD300 antigen like family member B              | 114922781 | 114934386 | TC1100004051.mm.1 | 0.2  | 0.097432 |
| TC0600002858.mm.1 | ENSMUST00000104829  | Gm26429 | predicted gene, 26429                           | 39460330  | 39460439  | TC1700002098.mm.1 | -0.2 | 0.097516 |
| TC0600002877.mm.1 | NM_020022           | Rfc2    | replication factor C (activator 1) 2            | 134582690 | 134598328 | TC0500001560.mm.1 | -0.3 | 0.09761  |
| TC0600002879.mm.1 | NM_023737           | Ehhadh  | enoyl-Coenzyme A, hydratase/3-hydroxyacyl Co    | 21761285  | 21787844  | TC1600001368.mm.1 | 0.6  | 0.097649 |
| TC0600002882.mm.1 | NCBI_Gene:629871:p  | Ighv1-1 | immunoglobulin heavy variable V1-18             | 114682632 | 114683065 | TC1200002610.mm.1 | -1.0 | 0.097675 |
| TC0600002885.mm.1 | NM_031254           | Trem2   | triggering receptor expressed on myeloid cells  | 48346401  | 48354147  | TC1700000937.mm.1 | 0.2  | 0.097757 |
| TC0600002897.mm.1 | ENSMUST00000180085  | Gm24657 | predicted gene, 24657                           | 59366366  | 59366444  | TC0700003143.mm.1 | -0.2 | 0.097763 |
| TC0600002901.mm.1 | ENSMUST00000178792  | Gm23922 | predicted gene, 23922                           | 59370106  | 59370184  | TC0700003145.mm.1 | -0.2 | 0.097763 |
| TC0600002902.mm.1 | ENSMUST00000180236  | Gm22996 | predicted gene, 22996                           | 59375713  | 59375791  | TC0700003148.mm.1 | -0.2 | 0.097763 |
| TC0600002909.mm.1 | ENSMUST00000157263  | U7      | U7 small nuclear RNA                            | 7886444   | 7886505   | TC1100002200.mm.1 | 0.2  | 0.097916 |
| TC0600002918.mm.1 | NM_001042592        | Arrdc4  | arrestin domain containing 4                    | 68736994  | 68749241  | TC0700003464.mm.1 | 0.1  | 0.097934 |
| TC0600002920.mm.1 | XM_003689058        | Gm21268 | predicted gene, 21268                           | 53050773  | 53051486  | TC0Y00000370.mm.1 | 0.2  | 0.097948 |
| TC0600002925.mm.1 | XM_001478251        | Gm20936 | predicted gene, 20936                           | 65648471  | 65649184  | TC0Y00000429.mm.1 | 0.2  | 0.097948 |
| TC0600002955.mm.1 | NM_030257           | Lysmd3  | LysM, putative peptidoglycan-binding, domain c  | 81657806  | 81671892  | TC1300000965.mm.1 | -0.2 | 0.097961 |
| TC0600002956.mm.1 | NM_183145           | Zfp748  | zinc finger protein 748                         | 67538641  | 67553152  | TC1300002252.mm.1 | -0.3 | 0.09801  |
| TC0600002958.mm.1 | NM_018864           | Impa1   | inositol (myo)-1(or 4)-monophosphatase 1        | 10313540  | 10331439  | TC0300001643.mm.1 | -0.2 | 0.098024 |
| TC0600002959.mm.1 | NM_007915           | Ei24    | etoposide induced 2.4 mRNA                      | 36779153  | 36797393  | TC0900002038.mm.1 | 0.2  | 0.098115 |
| TC0600002960.mm.1 | NM_001081431        | Zscan25 | zinc finger and SCAN domain containing 25       | 145283343 | 145291469 | TC0500001771.mm.1 | -0.1 | 0.098153 |
| TC0600002961.mm.1 | NM_146289           | Olfr113 | olfactory receptor 113                          | 37574454  | 37575448  | TC1700002074.mm.1 | 0.2  | 0.098161 |
| TC0600002974.mm.1 | ENSMUST00000158851  | Gm25364 | predicted gene, 25364                           | 115601656 | 115601762 | TC1100001900.mm.1 | 0.2  | 0.098176 |
| TC0600002975.mm.1 | ENSMUST00000083310  | Gm22296 | predicted gene, 22296                           | 55910821  | 55910923  | TC1200001775.mm.1 | 0.2  | 0.09818  |
| TC0600002978.mm.1 | ENSMUST00000099009  | 2210418 | RIKEN cDNA 2210418O10 gene                      | 176226569 | 176261852 | TC0200002735.mm.1 | 0.3  | 0.098438 |
| TC0600002980.mm.1 | NM_198011           | E430018 | RIKEN cDNA E430018J23 gene                      | 127389673 | 127393629 | TC0700004663.mm.1 | -0.1 | 0.098456 |
| TC0600002983.mm.1 | NM_017396           | Cyp3a41 | cytochrome P450, family 3, subfamily a, polypep | 145694049 | 145720136 | TC0500003745.mm.1 | -0.1 | 0.09853  |
| TC0600002993.mm.1 | NM_026032           | Lsm1    | LSM1 homolog, U6 small nuclear RNA associat     | 25785317  | 25803975  | TC0800000330.mm.1 | -0.1 | 0.098559 |
| TC0600002994.mm.1 | ENSMUST00000119495  | Gm14311 | predicted gene 14311                            | 60361639  | 60361786  | TC0400000667.mm.1 | 0.1  | 0.098806 |
| TC0600002995.mm.1 | ENSMUST00000158331  | Gm24945 | predicted gene, 24945                           | 60804578  | 60804703  | TC1100000765.mm.1 | -0.2 | 0.098818 |
| TC0600003000.mm.1 | NM_025652           | Gtf3a   | general transcription factor III A              | 146948657 | 146955614 | TC0500001798.mm.1 | -0.2 | 0.098852 |
| TC0600003002.mm.1 | ENSMUST00000178873  | Gm21869 | predicted gene, 21869                           | 74950655  | 74951338  | TC0Y00000469.mm.1 | 0.1  | 0.099124 |
| TC0600003003.mm.1 | ENSMUST00000146939  | Gm10186 | predicted gene 10186                            | 3583799   | 3584233   | TC0800001611.mm.1 | -0.4 | 0.099188 |
| TC0600003037.mm.1 | ENSMUST00000122345  | Gm14126 | predicted gene 14126                            | 150378878 | 150379272 | TC0200004835.mm.1 | -0.2 | 0.099313 |
| TC0600003040.mm.1 | NM_001112744        | Arhgef1 | Rho guanine nucleotide exchange factor (GEF) 1  | 154278470 | 154301676 | TC0400004118.mm.1 | -0.1 | 0.099392 |
| TC0600003045.mm.1 | ENSMUST00000175136  | Gm23053 | predicted gene, 23053                           | 35524543  | 35524638  | TC0600002071.mm.1 | 0.5  | 0.099437 |
| TC0600003046.mm.1 | ENSMUST00000118291  | Gm16166 | predicted gene 16166                            | 120928186 | 120928972 | TC1000001489.mm.1 | -0.1 | 0.09944  |
| TC0600003063.mm.1 | NM_026331           | Slc25a3 | solute carrier family 25, member 37             | 69241848  | 69285112  | TC1400002310.mm.1 | -0.2 | 0.09951  |
| TC0600003069.mm.1 | NM_009418           | Tpp2    | tripeptidyl peptidase II                        | 43934002  | 44002999  | TC0100000332.mm.1 | -0.3 | 0.099575 |
| TC0600003073.mm.1 | NM_177250           | Lingo4  | leucine rich repeat and Ig domain containing 4  | 94398517  | 94404501  | TC0300000865.mm.1 | -0.1 | 0.099721 |
| TC0600003076.mm.1 | NCBI_Gene:10004241  | Trav7d- | T cell receptor alpha variable 7D-3             | 52744249  | 53022049  | TC1400000624.mm.1 | -0.2 | 0.099768 |
| TC0600003079.mm.1 | NM_001001806        | Zfp36l2 | zinc finger protein 36, C3H type-like 2         | 84183924  | 84187947  | TC1700002647.mm.1 | 0.3  | 0.099861 |
| TC0600003083.mm.1 | NM_145512           | SFT2d2  | SFT2 domain containing 2                        | 165174341 | 165194433 | TC0100003439.mm.1 | 0.3  | 0.100024 |
| TC0600003091.mm.1 | ENSMUST00000127327  | Gm11749 | predicted gene 11749                            | 118866257 | 118867220 | TC1100004168.mm.1 | -0.2 | 0.100076 |
| TC0600003092.mm.1 | NR_028558           | Snora41 | small nucleolar RNA, H/ACA box 41               | 63179004  | 63179135  | TC0100000521.mm.1 | -0.8 | 0.100154 |
| TC0600003102.mm.1 | ENSMUST00000179745  | Gm8266  | predicted gene 8266                             | 5566713   | 5567904   | TC1400001397.mm.1 | -0.2 | 0.100177 |
| TC0600003108.mm.1 | XM_001473737        | Gm2483  | predicted gene 2483                             | 42489691  | 42491983  | TC0X00000404.mm.1 | -0.2 | 0.100183 |
| TC0600003109.mm.1 | ENSMUST00000121361  | Gm12009 | predicted gene 12009                            | 15049158  | 15050257  | TC1100000149.mm.1 | -0.4 | 0.100314 |
| TC0600003110.mm.1 | NCBI_Gene:382692:p  | Ighv1-1 | immunoglobulin heavy variable V1-19             | 114708648 | 114709081 | TC1200002612.mm.1 | -1.0 | 0.100315 |
| TC0600003123.mm.1 | NM_001081247        | Polr3a  | polymerase (RNA) III (DNA directed) polypeptide | 24448694  | 24487046  | TC1400001579.mm.1 | -0.1 | 0.100333 |
| TC0600003136.mm.1 | NM_010281           | Ggh     | gamma-glutamyl hydrolase                        | 20042052  | 20066750  | TC0400000169.mm.1 | 0.2  | 0.100343 |
| TC0600003139.mm.1 | NM_178214           | Hist2h2 | histone cluster 2, H2be                         | 96221119  | 96223740  | TC0300000930.mm.1 | -0.4 | 0.10036  |
| TC0600003144.mm.1 | ENSMUST00000158509  | Gm24767 | predicted gene, 24767                           | 115099554 | 115099648 | TC0600001274.mm.1 | 0.2  | 0.100532 |
| TC0600003159.mm.1 | ENSMUST00000175081  | Gm23162 | predicted gene, 23162                           | 13622643  | 13622763  | TC0400002227.mm.1 | 0.4  | 0.100628 |
| TC0600003165.mm.1 | ENSMUST000000083181 | Gm23298 | predicted gene, 23298                           | 80911477  | 80911583  | TC1200000749.mm.1 | -0.9 | 0.100681 |
| TC0600003168.mm.1 | NM_001166635        | Mid1ip1 | Mid1 interacting protein 1 (gastrulation specif | 10715013  | 10719702  | TC0X00000131.mm.1 | 0.1  | 0.100864 |
| TC0600003170.mm.1 | NM_027726           | Dlg5    | discs, large homolog 5 (Drosophila)             | 24133953  | 24245920  | TC1400001573.mm.1 | 0.1  | 0.100921 |
| TC0600003189.mm.1 | NR_029781           | Mir1a-2 | microRNA 1a-2                                   | 10785481  | 10785552  | TC1800000983.mm.1 | 0.2  | 0.100926 |
| TC0600003194.mm.1 | XR_105587           | Gm10736 | predicted gene 10736                            | 111588072 | 111593652 | TC1300002665.mm.1 | -0.6 | 0.101078 |
| TC0600003195.mm.1 | BC119609            | Phxr1   | per-hexamer repeat gene 1                       | 3431868   | 3432385   | TC0200000007.mm.1 | -0.2 | 0.101219 |
| TC0600003196.mm.1 | NM_177778           | Armc7   | armadillo repeat containing 7                   | 115475667 | 115490467 | TC1100001896.mm.1 | -0.1 | 0.101253 |
| TC0600003205.mm.1 | ENSMUST00000183692  | AC14219 | N/A                                             | 129189015 | 129189124 | TC0600003226.mm.1 | 0.2  | 0.101275 |
| TC0600003212.mm.1 | NM_021499           | Wrap73  | WD repeat containing, antisense to Trp73        | 154142372 | 154168263 | TC0400002041.mm.1 | -0.1 | 0.10135  |
| TC0600003216.mm.1 | ENSMUST00000083833  | Gm23849 | predicted gene, 23849                           | 101627366 | 101627556 | TC1100001665.mm.1 | -1.0 | 0.101381 |
| TC0600003222.mm.1 | ENSMUST00000083317  | Gm23971 | predicted gene, 23971                           | 101645740 | 101645930 | TC1100003811.mm.1 | -1.0 | 0.101381 |
| TC0600003226.mm.1 | NM_033398           | Jmjd6   | jumonji domain containing 6                     | 116837432 | 116843449 | TC1100004127.mm.1 | -0.1 | 0.101409 |
| TC0600003229.mm.1 | ENSMUST00000104461  | Gm24989 | predicted gene, 24989                           | 77244928  | 77245015  | TC1100003264.mm.1 | -0.9 | 0.101602 |
| TC0600003236.mm.1 | NM_025404           | Arl4d   | ADP-ribosylation factor-like 4D                 | 101665541 | 101667832 | TC1100001668.mm.1 | -0.1 | 0.10165  |
| TC0600003265.mm.1 | ENSMUST00000104485  | Gm24471 | predicted gene, 24471                           | 99692399  | 99692529  | TC1300002524.mm.1 | 0.2  | 0.101714 |
| TC0600003268.mm.1 | ENSMUST00000184220  | MESTIT1 | MEST intronic transcript 1, antisense RNA conse | 30735964  | 30736062  | TC0600000279.mm.1 | 0.1  | 0.10178  |

|                   |                    |         |                                                 |           |           |                    |      |          |
|-------------------|--------------------|---------|-------------------------------------------------|-----------|-----------|--------------------|------|----------|
| TC0600003269.mm.1 | NM_175507          | Slc35g1 | solute carrier family 35, member G1             | 38395969  | 38405607  | TC1900000549.mm.1  | 0.1  | 0.101817 |
| TC0600003270.mm.1 | ENSMUST00000104384 | Gm24886 | predicted gene, 24886                           | 21794933  | 21795055  | TC0200003089.mm.1  | 0.3  | 0.101832 |
| TC0600003293.mm.1 | NR_028547          | Snord11 | small nucleolar RNA, C/D box 110                | 130275506 | 130275573 | TC0200001973.mm.1  | -1.1 | 0.102066 |
| TC0600003295.mm.1 | ENSMUST00000101582 | Gm3944  | predicted gene 3944                             | 18853872  | 18854207  | TC1200000156.mm.1  | 0.1  | 0.102201 |
| TC0600003305.mm.1 | XR_106365          | Gm11709 | predicted gene 11709                            | 115010335 | 115016193 | TC1100004056.mm.1  | 0.3  | 0.102202 |
| TC0600003307.mm.1 | ENSMUST00000117621 | Gm13750 | predicted gene 13750                            | 64150201  | 64150665  | TC0100000532.mm.1  | -0.2 | 0.102223 |
| TC0600003314.mm.1 | ENSMUST00000177756 | Gm22114 | predicted gene, 22114                           | 169799450 | 169799556 | TC0100003503.mm.1  | -0.6 | 0.10244  |
| TC0600003319.mm.1 | ENSMUST00000104625 | Gm24387 | predicted gene, 24387                           | 98558739  | 98558831  | TC0600002813.mm.1  | 0.4  | 0.102449 |
| TC0600003327.mm.1 | NR_027465          | Wac     | WW domain containing adaptor with coiled-coil   | 7868832   | 7973547   | TC1800000052.mm.1  | -0.2 | 0.102528 |
| TC0600003329.mm.1 | ENSMUST00000104238 | Gm26387 | predicted gene, 26387                           | 107907345 | 107907476 | TC0500001089.mm.1  | -0.7 | 0.102543 |
| TC0600003335.mm.1 | NM_001081149       | Kat6a   | K(lysine) acetyltransferase 6A                  | 22859535  | 22943262  | TC0800000288.mm.1  | -0.3 | 0.102588 |
| TC0600003336.mm.1 | ENSMUST00000104840 | Gm24683 | predicted gene, 24683                           | 116123900 | 116123987 | TC0X00001155.mm.1  | 0.5  | 0.102689 |
| TC0600003337.mm.1 | NM_001164059       | Sell    | selectin, lymphocyte                            | 164062076 | 164080785 | TC0100001496.mm.1  | -1.1 | 0.102775 |
| TC0600003354.mm.1 | NM_001007581       | 2810408 | RIKEN cDNA 2810408M09 gene                      | 165490110 | 165493324 | TC0200005151.mm.1  | -0.1 | 0.10279  |
| TC0600003365.mm.1 | ENSMUST00000103310 | Igkv14- | immunoglobulin kappa variable 14-126            | 67896172  | 67896642  | TC0600003511.mm.1  | 0.8  | 0.103005 |
| TC0600003369.mm.1 | NM_009950          | Cradd   | CASP2 and RIPK1 domain containing adaptor wit   | 95174740  | 95324133  | TC1000002721.mm.1  | 0.1  | 0.103153 |
| TC0600003375.mm.1 | ENSMUST00000120258 | Gm16420 | predicted gene 16420                            | 120114974 | 120115829 | TC0X00001175.mm.1  | -0.2 | 0.103369 |
| TC0600003378.mm.1 | NM_008872          | Plat    | plasminogen activator, tissue                   | 22757744  | 22782848  | TC0800000286.mm.1  | 0.3  | 0.103424 |
| TC0600003379.mm.1 | ENSMUST00000179815 | Gm25352 | predicted gene, 25352                           | 5881041   | 5881150   | TC0300000027.mm.1  | 0.2  | 0.103445 |
| TC0600003394.mm.1 | ENSMUST00000179561 | Gm25144 | predicted gene, 25144                           | 5885595   | 5885704   | TC0300000028.mm.1  | 0.2  | 0.103445 |
| TC0600003412.mm.1 | NM_130876          | Krtap19 | keratin associated protein 19-1                 | 88868918  | 88869410  | TC1600002016.mm.1  | -0.1 | 0.103451 |
| TC0600003420.mm.1 | NM_001025388       | Gm5506  | predicted gene 5506                             | 48045335  | 48048383  | TC1800000498.mm.1  | 0.2  | 0.103477 |
| TC0600003441.mm.1 | ENSMUST00000127465 | Vmn1r23 | vomeronasal 1 receptor 239, pseudogene          | 147452748 | 147453710 | TC0X00003145.mm.1  | 0.3  | 0.103597 |
| TC0600003465.mm.1 | ENSMUST00000083753 | Gm23734 | predicted gene, 23734                           | 127375131 | 127375239 | TC0100001119.mm.1  | -1.1 | 0.103602 |
| TC0600003469.mm.1 | NM_028440          | Abracl  | ABRA C-terminal like                            | 18011260  | 18023252  | TC1000001802.mm.1  | -0.2 | 0.103706 |
| TC0600003472.mm.1 | NM_010306          | Gnai3   | guanine nucleotide binding protein (G protein), | 108107275 | 108146152 | TC03000002731.mm.1 | -0.2 | 0.103779 |
| TC0600003479.mm.1 | NM_080638          | Mvp     | major vault protein                             | 126986860 | 127014621 | TC0700004660.mm.1  | 0.2  | 0.103885 |
| TC0600003492.mm.1 | ENSMUST00000118382 | Gm12604 | predicted gene 12604                            | 87580789  | 87581560  | TC0400000877.mm.1  | -0.1 | 0.103891 |
| TC0600003493.mm.1 | NM_011758          | Zfp39   | zinc finger protein 39                          | 58888153  | 58904225  | TC1100002835.mm.1  | -0.2 | 0.103955 |
| TC0600003494.mm.1 | ENSMUST00000137642 | Gm15534 | predicted gene 15534                            | 64990955  | 64991508  | TC0600000757.mm.1  | 0.1  | 0.10397  |
| TC0600003495.mm.1 | ENSMUST00000165968 | Serpina | serine (or cysteine) peptidase inhibitor, clade | 104189517 | 104192926 | TC1200002291.mm.1  | 0.2  | 0.104056 |
| TC0600003496.mm.1 | XM_001472376       | Gm20783 | predicted gene, 20783                           | 124428076 | 124440899 | TC09000003319.mm.1 | -0.1 | 0.104064 |
| TC0600003497.mm.1 | NCBI_Gene:692245:p | Igkv12- | immunoglobulin kappa variable 12-46             | 69764523  | 69764992  | TC0600003577.mm.1  | -0.8 | 0.104113 |
| TC0600003498.mm.1 | ENSMUST00000104292 | Gm23439 | predicted gene, 23439                           | 107886508 | 107886639 | TC0200004288.mm.1  | 0.2  | 0.104172 |
| TC0600003504.mm.1 | NM_174875          | Atg4a   | autophagy related 4A, cysteine peptidase        | 103643953 | 103646069 | TC03000002627.mm.1 | -0.1 | 0.104236 |
| TC0600003505.mm.1 | NM_178758          | Acsm5   | acyl-CoA synthetase medium-chain memt           | 119526265 | 119543793 | TC0700001709.mm.1  | 0.2  | 0.104282 |
| TC0600003506.mm.1 | NM_019645          | Pkp1    | plakophilin 1                                   | 135871395 | 135919207 | TC0100003138.mm.1  | -0.2 | 0.104353 |
| TC0600003507.mm.1 | NM_015786          | Hist1h1 | histone cluster 1, H1c                          | 23738807  | 23740367  | TC1300000258.mm.1  | 0.3  | 0.104355 |
| TC0600003508.mm.1 | ENSMUST00000158712 | Gm24346 | predicted gene, 24346                           | 65777014  | 65777207  | TC0500000624.mm.1  | -0.1 | 0.104398 |
| TC0600003509.mm.1 | ENSMUST00000175084 | Gm23164 | predicted gene, 23164                           | 76479219  | 76479329  | TC0200001130.mm.1  | 0.3  | 0.104533 |
| TC0600003510.mm.1 | NM_008771          | P2rx1   | purinergic receptor P2X, ligand-gated ion chann | 72999103  | 73015200  | TC1000010111.mm.1  | -0.1 | 0.104603 |
| TC0600003511.mm.1 | NM_011181          | Cyth2   | cytohesin 2                                     | 45806637  | 45814581  | TC0700003022.mm.1  | -0.1 | 0.104651 |
| TC0600003514.mm.1 | ENSMUST00000158141 | Gm24394 | predicted gene, 24394                           | 36612117  | 36612239  | TC1400000389.mm.1  | -0.2 | 0.104699 |
| TC0600003515.mm.1 | NM_133763          | Dnttip1 | deoxynucleotidyltransferase, terminal, interact | 164745983 | 164768607 | TC0200002530.mm.1  | -0.1 | 0.104954 |
| TC0600003516.mm.1 | ENSMUST00000158392 | Gm25519 | predicted gene, 25519                           | 112198915 | 112199041 | TC03000002776.mm.1 | 0.2  | 0.104971 |
| TC0600003517.mm.1 | ENSMUST00000116986 | Gm25510 | predicted gene, 25510                           | 115382099 | 115382221 | TC09000001534.mm.1 | 0.2  | 0.105003 |
| TC0600003518.mm.1 | NM_026908          | Cab39l  | calcium binding protein 39-like                 | 59440965  | 59548903  | TC1400000835.mm.1  | 0.4  | 0.105092 |
| TC0600003519.mm.1 | ENSMUST00000082423 | mt-Tp   | mitochondrially encoded tRNA proline            | 15356     | 15422     | TC0M000000029.mm.1 | 0.8  | 0.105232 |
| TC0600003520.mm.1 | ENSMUST00000183549 | RP23-34 | N/A                                             | 14856953  | 14857340  | TC0700002393.mm.1  | -0.2 | 0.105278 |
| TC0600003521.mm.1 | NM_030601          | Clca2   | chloride channel calcium activated 2            | 144796559 | 144819494 | TC0300003252.mm.1  | -0.1 | 0.105309 |
| TC0600003522.mm.1 | ENSMUST00000119050 | Gm12186 | predicted gene 12186                            | 48996687  | 48997713  | TC1100002646.mm.1  | -0.3 | 0.105324 |
| TC0600003524.mm.1 | ENSMUST00000083135 | Gm26072 | predicted gene, 26072                           | 70550841  | 70550947  | TC0500002556.mm.1  | 0.2  | 0.105326 |
| TC0600003525.mm.1 | ENSMUST00000119777 | Gm12848 | predicted gene 12848                            | 115652389 | 115653480 | TC0400001230.mm.1  | -0.2 | 0.105343 |
| TC0600003526.mm.1 | XM_001480560       | Gm5633  | predicted gene 5633                             | 21776099  | 21776836  | TC1200001499.mm.1  | -0.2 | 0.105372 |
| TC0600003527.mm.1 | ENSMUST00000102183 | Gm26384 | predicted gene, 26384                           | 21284103  | 21284212  | TC1700001553.mm.1  | -0.3 | 0.105398 |
| TC0600003528.mm.1 | NM_178215          | Hist2h3 | histone cluster 2, H3b                          | 96268654  | 96269141  | TC0300000934.mm.1  | -0.2 | 0.105476 |
| TC0600003529.mm.1 | NCBI_Gene:674018:p | Ighv1-6 | immunoglobulin heavy variable 1-61              | 115359140 | 115359572 | TC1200002638.mm.1  | -1.1 | 0.105481 |
| TC0600003530.mm.1 | NM_009624          | Adcy9   | adenylate cyclase 9                             | 4287529   | 4420498   | TC1600001124.mm.1  | 0.1  | 0.105522 |
| TC0600003531.mm.1 | ENSMUST00000178723 | CR97458 | N/A                                             | 85974     | 120530    | TC4_JH584293_rand  | 0.1  | 0.105534 |
| TC0600003534.mm.1 | ENSMUST00000121666 | Gm13505 | predicted gene 13505                            | 54240569  | 54241385  | TC0200000848.mm.1  | -0.2 | 0.105553 |
| TC0600003536.mm.1 | NM_026369          | Arpc5   | actin related protein 2/3 complex, subunit 5    | 152766542 | 152775597 | TC0100001369.mm.1  | -0.3 | 0.105558 |
| TC0600003540.mm.1 | NM_001122851       | Faim    | Fas apoptotic inhibitory molecule               | 98986373  | 99002019  | TC0900001243.mm.1  | -0.1 | 0.105653 |
| TC0600003542.mm.1 | ENSMUST00000118596 | Gm12235 | predicted gene 12235                            | 55463840  | 55464009  | TC1100002786.mm.1  | -0.1 | 0.105709 |
| TC0600003543.mm.1 | ENSMUST00000121169 | Gm13534 | predicted gene 13534                            | 58108060  | 58108572  | TC0200000874.mm.1  | -0.1 | 0.105751 |
| TC0600003544.mm.1 | NM_145422          | D10Wsu5 | DNA segment, Chr 10, Wayne State University 5:  | 85938637  | 85957223  | TC1000002612.mm.1  | -0.2 | 0.10581  |
| TC0600003545.mm.1 | NM_177682          | Ccz1    | CCZ1 vacuolar protein trafficking and biogenesi | 143987909 | 144014853 | TC0500003568.mm.1  | -0.2 | 0.106009 |
| TC0600003546.mm.1 | NM_011394          | Slc20a2 | solute carrier family 20, member 2              | 22476700  | 22569616  | TC0800000277.mm.1  | 0.1  | 0.106028 |
| TC0600003547.mm.1 | NM_021430          | Rilp1   | Rab interacting lysosomal protein-like 1        | 124493080 | 124531391 | TC0500003258.mm.1  | 0.1  | 0.106059 |
| TC0600003548.mm.1 | NM_178708          | Pcid2   | PCI domain containing 2                         | 13077189  | 13105459  | TC0800001727.mm.1  | -0.2 | 0.106087 |
| TC0600003549.mm.1 | NM_007747          | Cox5a   | cytochrome c oxidase subunit Va                 | 57521232  | 57532427  | TC0900000705.mm.1  | -0.2 | 0.106128 |
| TC0600003550.mm.1 | ENSMUST00000119414 | Gm15575 | predicted gene 15575                            | 38748729  | 38750309  | TC1600001615.mm.1  | -0.1 | 0.106158 |
| TC0600003551.mm.1 | ENSMUST00000178194 | Gm13910 | predicted gene 13910                            | 108948780 | 108950727 | TC0200001617.mm.1  | 0.5  | 0.106224 |
| TC0600003552.mm.1 | NM_010241          | Aktip   | thymoma viral proto-oncogene 1 interacting pro  | 91112041  | 91135496  | TC0800002680.mm.1  | 0.2  | 0.106239 |
| TC0600003553.mm.1 | NR_035417          | Mir669i | microRNA 669i                                   | 10517604  | 10517730  | TC0200000204.mm.1  | -0.1 | 0.106341 |
| TC0600003554.mm.1 | NM_175358          | Zdhc15  | zinc finger, DHHC domain containing 15          | 104536969 | 104671064 | TC0X00002803.mm.1  | -0.2 | 0.106347 |
| TC0600003555.mm.1 | NM_001167743       | Slnf8   | schlafen 8                                      | 83002158  | 83020810  | TC1100003382.mm.1  | -0.3 | 0.106347 |
| TC0600003557.mm.1 | ENSMUST00000118061 | Gm13812 | predicted gene 13812                            | 100460188 | 100461534 | TC0200004200.mm.1  | -0.2 | 0.106499 |
| TC0600003558.mm.1 | NM_001289927       | Egr3    | early growth response 3 (Egr3), transcript vari | 0         | 0         | TSUnmapped0000004  | -0.1 | 0.106527 |

|                   |                    |         |                                                 |           |           |                   |      |          |
|-------------------|--------------------|---------|-------------------------------------------------|-----------|-----------|-------------------|------|----------|
| TC0600003559.mm.1 | NCBI_Gene:692161:p | Igkv19- | immunoglobulin kappa chain variable 19-93       | 68736297  | 68736764  | TC0600003545.mm.1 | -1.2 | 0.106567 |
| TC0600003560.mm.1 | NM_007783          | Csk     | c-src tyrosine kinase                           | 57626646  | 57653631  | TC0900002377.mm.1 | -0.4 | 0.106628 |
| TC0600003561.mm.1 | NM_001001488       | AtP8b1  | ATPase, class I, type 8B, member 1              | 64528979  | 64661000  | TC1800001463.mm.1 | 0.2  | 0.106832 |
| TC0600003562.mm.1 | NM_176840          | Osbpl11 | oxysterol binding protein-like 11               | 33185071  | 33243312  | TC1600000464.mm.1 | 0.3  | 0.107033 |
| TC0600003563.mm.1 | ENSMUST00000158861 | Gm24737 | predicted gene, 24737                           | 93956310  | 93956409  | TC1300001054.mm.1 | 0.2  | 0.107074 |
| TC0600003564.mm.1 | NCBI_Gene:668577:p | Ighv1-7 | immunoglobulin heavy variable 1-73              | 115790593 | 115790887 | TC1200002652.mm.1 | -1.0 | 0.107104 |
| TC0600003565.mm.1 | NM_029282          | Tti1    | TELO2 interacting protein 1                     | 157981803 | 158028433 | TC0200005028.mm.1 | -0.2 | 0.10711  |
| TC0600003566.mm.1 | NCBI_Gene:622728:p | Ighv1-7 | immunoglobulin heavy variable 1-75              | 115833950 | 115834396 | TC1200002655.mm.1 | -1.2 | 0.107144 |
| TC0600003567.mm.1 | NM_173761          | Ythdf1  | YTH domain family 1                             | 180904377 | 180920949 | TC0200005425.mm.1 | -0.2 | 0.107292 |
| TC0600003568.mm.1 | NCBI_Gene:629908:p | Ighv1-4 | immunoglobulin heavy variable V1-43             | 114945950 | 114946243 | TC1200002625.mm.1 | -1.3 | 0.107336 |
| TC0600003569.mm.1 | ENSMUST00000179897 | Gm24870 | predicted gene, 24870                           | 103641926 | 103642032 | TC1300001165.mm.1 | -0.8 | 0.107358 |
| TC0600003570.mm.1 | NM_025380          | Eef1e1  | eukaryotic translation elongation factor 1 epsi | 38645689  | 38659028  | TC1300001837.mm.1 | -0.3 | 0.107426 |
| TC0600003571.mm.1 | NM_030692          | Sacm1l  | SAC1 (suppressor of actin mutations 1, homolog  | 123529882 | 123592598 | TC0900001666.mm.1 | 0.2  | 0.107491 |
| TC0600003572.mm.1 | XM_988334          | Gm13570 | predicted gene 13570                            | 60098346  | 60099088  | TC0200003597.mm.1 | -0.2 | 0.107678 |
| TC0600003573.mm.1 | NM_009055          | Rfx1    | regulatory factor X, 1 (influences HLA class II | 84066836  | 84096992  | TC0800000945.mm.1 | -0.1 | 0.10768  |
| TC0600003574.mm.1 | ENSMUST00000119249 | Gm15358 | predicted gene 15358                            | 19513878  | 19514397  | TC0800001810.mm.1 | 0.2  | 0.10773  |
| TC0600003575.mm.1 | NM_001105159       | Cyp3a41 | cytochrome P450, family 3, subfamily a, polypep | 145558664 | 145584730 | TC0500003744.mm.1 | -0.1 | 0.107739 |
| TC0600003576.mm.1 | NM_146436          | Olfr998 | olfactory receptor 998                          | 85590510  | 85591521  | TC0200001241.mm.1 | 0.2  | 0.107747 |
| TC0600003577.mm.1 | NM_130905          | Cd209e  | CD209e antigen                                  | 3847965   | 3854309   | TC0800001622.mm.1 | -0.1 | 0.107802 |
| TC0600003578.mm.1 | ENSMUST00000104806 | Gm23135 | predicted gene, 23135                           | 167626315 | 167626403 | TC0200005194.mm.1 | 0.6  | 0.107862 |
| TC0600003579.mm.1 | NCBI_Gene:780932:p | Ighv1-5 | immunoglobulin heavy variable 1-55              | 115208095 | 115208527 | TC1200002632.mm.1 | -1.3 | 0.107909 |
| TC0600003580.mm.1 | NM_019984          | Tgm1    | transglutaminase 1, K polypeptide               | 55700009  | 55713492  | TC1400002098.mm.1 | -0.1 | 0.107983 |
| TC0600003581.mm.1 | NM_026370          | Kat8    | K(lysine) acetyltransferase 8                   | 127912517 | 127925832 | TC0700001870.mm.1 | -0.1 | 0.108045 |
| TC0600003582.mm.1 | ENSMUST00000082608 | Gm22980 | predicted gene, 22980                           | 117154093 | 117154162 | TC0400003363.mm.1 | -1.1 | 0.10807  |
| TC0600003584.mm.1 | NM_144959          | Hltf    | helicase-like transcription factor              | 20057811  | 20118491  | TC0300000139.mm.1 | -0.1 | 0.10808  |
| TC0600003585.mm.1 | ENSMUST00000182254 | Gm9146  | predicted gene 9146                             | 32473252  | 32474257  | TC0700000598.mm.1 | -0.1 | 0.108085 |
| TC0600003586.mm.1 | ENSMUST00000061679 | 4921508 | RIKEN cDNA 4921508M14 gene                      | 34873730  | 34874828  | TC1200001632.mm.1 | 0.1  | 0.108178 |
| TC0600003587.mm.1 | NM_146748          | Olfr661 | olfactory receptor 661                          | 104688013 | 104688976 | TC0700001532.mm.1 | -0.2 | 0.108252 |
| TC0600003588.mm.1 | XM_893730          | Gm6934  | predicted gene 6934                             | 51832160  | 51864780  | TC1700000957.mm.1 | -0.2 | 0.108298 |
| TC0600003589.mm.1 | ENSMUST00000083339 | Gm25128 | predicted gene, 25128                           | 35247175  | 35247250  | TC1700000679.mm.1 | -1.1 | 0.108411 |
| TC0600003590.mm.1 | ENSMUST00000118187 | Gm11875 | predicted gene 11875                            | 21626380  | 21627178  | TC0400000175.mm.1 | -0.2 | 0.108448 |
| TC0600003591.mm.1 | ENSMUST00000083445 | Gm22743 | predicted gene, 22743                           | 104251012 | 104251144 | TC1100003888.mm.1 | -0.2 | 0.108453 |
| TC0600003592.mm.1 | NCBI_Gene:620240:p | Igkv8-2 | immunoglobulin kappa variable 8-26              | 70193225  | 70740554  | TC0600003525.mm.1 | -0.7 | 0.10846  |
| TC0600003593.mm.1 | ENSMUST00000080330 | Gm10916 | predicted gene 10916                            | 50769248  | 50769730  | TC1400000566.mm.1 | -0.4 | 0.108484 |
| TC0600003594.mm.1 | ENSMUST00000158284 | Gm25432 | predicted gene, 25432                           | 5435900   | 5435965   | TC1900000066.mm.1 | -0.3 | 0.108591 |
| TC0600003595.mm.1 | NM_029612          | Slamf9  | SLAM family member 9                            | 172475358 | 172478575 | TC0100001615.mm.1 | 0.3  | 0.108648 |
| TC0600003596.mm.1 | NM_021339          | Cdon    | cell adhesion molecule-related/down-regulated   | 35421124  | 35507652  | TC0900000336.mm.1 | 0.3  | 0.10874  |
| TC0600003597.mm.1 | ENSMUST00000120022 | Gm12821 | predicted gene 12821                            | 112537061 | 112537660 | TC0400001198.mm.1 | -0.1 | 0.108748 |
| TC0600003599.mm.1 | NM_001100596_2     | Gm13305 | predicted gene 13305                            | 42655275  | 42665763  | TC0400002503.mm.1 | 0.1  | 0.108777 |
| TC0600003600.mm.1 | NM_001100596_3     | Gm13305 | predicted gene 13305                            | 7078      | 17566     | TC4_JH584293_rand | 0.1  | 0.108777 |
| TC0600003602.mm.1 | NM_001100596_4     | Gm13305 | predicted gene 13305                            | 3084      | 13572     | TC4_JH584294_rand | 0.1  | 0.108777 |
| TC0600003604.mm.1 | NM_177305          | Arl4c   | ADP-ribosylation factor-like 4C                 | 88673125  | 88702221  | TC0100002776.mm.1 | -0.1 | 0.10888  |
| TC0600003606.mm.1 | ENSMUST00000118265 | Anp32-p | acidic (leucine-rich) nuclear phosphoprotein 32 | 33394879  | 33395266  | TC1100002491.mm.1 | -0.4 | 0.108941 |
| TC0600003610.mm.1 | NM_026775          | Tmed10  | transmembrane emp24-like trafficking protein 1  | 85340614  | 85374717  | TC1200002094.mm.1 | 0.3  | 0.108955 |
| TC0600003611.mm.1 | NM_001160143       | Gm20823 | predicted gene, 20823                           | 62462510  | 62464845  | TC0Y00000415.mm.1 | -0.2 | 0.109088 |
| TC0600003612.mm.1 | NM_027420          | 2610034 | RIKEN cDNA 2610034B18 gene                      | 79935359  | 79935359  | TC0700003574.mm.1 | 0.1  | 0.109128 |
| TC0600003613.mm.1 | ENSMUST00000118260 | Gm14415 | predicted gene 14415                            | 177103564 | 177106488 | TC0200005359.mm.1 | 0.1  | 0.10915  |
| TC0700000001.mm.1 | NM_181325          | Slc25a1 | solute carrier family 25 (mitochondrial carrier | 22375550  | 22398621  | TC0800001867.mm.1 | 0.2  | 0.109218 |
| TC0700000003.mm.1 | NM_007984          | Fscn1   | fascin homolog 1, actin bundling protein (Stron | 142960343 | 142973189 | TC0500001724.mm.1 | 0.2  | 0.109316 |
| TC0700000005.mm.1 | ENSMUST00000082906 | Gm26204 | predicted gene, 26204                           | 85908353  | 85908459  | TC0300002259.mm.1 | -0.8 | 0.109387 |
| TC0700000007.mm.1 | ENSMUST00000178453 | Got2-ps | glutamate oxaloacetate transaminase 2, mitochr  | 138364173 | 138365580 | TC0500003479.mm.1 | -0.4 | 0.109435 |
| TC0700000013.mm.1 | NM_011914          | Nelfa   | negative elongation factor complex member A, \  | 33896936  | 33936413  | TC0500002223.mm.1 | -0.2 | 0.109471 |
| TC0700000015.mm.1 | ENSMUST00000082663 | Gm22299 | predicted gene, 22299                           | 58041516  | 58041651  | TC1500001566.mm.1 | -0.2 | 0.109492 |
| TC0700000018.mm.1 | ENSMUST00000158138 | Gm24391 | predicted gene, 24391                           | 120524897 | 120524998 | TC0600001350.mm.1 | 0.2  | 0.109534 |
| TC0700000022.mm.1 | ENSMUST00000083170 | Gm26128 | predicted gene, 26128                           | 65626394  | 65626503  | TC1100000838.mm.1 | -0.7 | 0.109592 |
| TC0700000030.mm.1 | XM_003688788       | LOC1008 | c-C motif chemokine 19-like                     | 41920842  | 41923020  | TC0400000389.mm.1 | -0.1 | 0.109605 |
| TC0700000040.mm.1 | NM_007780          | Csf2rb  | colony stimulating factor 2 receptor, beta, low | 78325798  | 78353847  | TC1500000641.mm.1 | 0.2  | 0.109723 |
| TC0700000047.mm.1 | NCBI_Gene:627813:p | Trdv1   | T cell receptor delta variable 1                | 53881532  | 53882217  | TC1400000712.mm.1 | -0.2 | 0.109828 |
| TC0700000048.mm.1 | NCBI_Gene:668599:p | Ighv1-8 | Ighv1-86 immunoglobulin heavy variable 1-86     | 116009659 | 116009954 | TC1200002665.mm.1 | -0.7 | 0.109847 |
| TC0700000049.mm.1 | NM_011408          | Slnf2   | schlafen 2                                      | 83065112  | 83070678  | TC1100001238.mm.1 | -0.4 | 0.109873 |
| TC0700000051.mm.1 | ENSMUST00000119397 | Gm5913  | predicted gene 5913                             | 97427712  | 97429110  | TC0800002763.mm.1 | -0.4 | 0.10988  |
| TC0700000052.mm.1 | ENSMUST00000120657 | Gm12201 | predicted gene 12201                            | 51106631  | 51107869  | TC1100000562.mm.1 | -0.3 | 0.109948 |
| TC0700000057.mm.1 | NM_010023          | Eci1    | enoyl-Coenzyme A delta isomerase 1              | 24426683  | 24439318  | TC1700000337.mm.1 | 0.3  | 0.109976 |
| TC0700000063.mm.1 | NM_013468          | Ankrd1  | ankyrin repeat domain 1 (cardiac muscle)        | 36111965  | 36119844  | TC1900001437.mm.1 | -0.2 | 0.110008 |
| TC0700000064.mm.1 | ENSMUST00000120641 | Gm15925 | predicted gene 15925                            | 3795904   | 3799631   | TC0700002139.mm.1 | 0.3  | 0.110206 |
| TC0700000075.mm.1 | ENSMUST00000104130 | Gm24173 | predicted gene, 24173                           | 11134111  | 11134238  | TC0100001963.mm.1 | -0.1 | 0.110219 |
| TC0700000082.mm.1 | XM_001473255       | Gm5471  | predicted pseudogene 5471                       | 44971794  | 44972135  | TC1500001469.mm.1 | -0.4 | 0.110395 |
| TC0700000084.mm.1 | NM_001190371       | Ankrd29 | ankyrin repeat domain 29                        | 12252357  | 12305720  | TC1800000995.mm.1 | 0.2  | 0.110441 |
| TC0700000099.mm.1 | NM_178193          | Hist1h4 | histone cluster 1, H4b                          | 23756937  | 23757427  | TC1300000261.mm.1 | -0.2 | 0.110497 |
| TC0700000107.mm.1 | NM_020557          | Cmpk2   | cytidine monophosphate (UMP-CMP) kinase 2, n    | 26469204  | 26479837  | TC1200000225.mm.1 | 0.1  | 0.110559 |
| TC0700000138.mm.1 | NM_010340          | Gpr50   | G-protein-coupled receptor 50                   | 71663667  | 71669257  | TC0X00000653.mm.1 | 0.6  | 0.110612 |
| TC0700000142.mm.1 | ENSMUST00000120353 | Gm14240 | predicted gene 14240                            | 156056128 | 156056673 | TC0200002382.mm.1 | -0.1 | 0.110645 |
| TC0700000149.mm.1 | ENSMUST00000117893 | Gm12251 | predicted gene 12251                            | 58392769  | 58393563  | TC1100002815.mm.1 | 0.3  | 0.110737 |
| TC0700000150.mm.1 | NM_001085546       | Gm14393 | predicted gene 14393                            | 175061549 | 175067781 | TC0200005328.mm.1 | 0.4  | 0.110737 |
| TC0700000152.mm.1 | ENSMUST00000075147 | Gm9770  | predicted gene 9770                             | 130412499 | 130413312 | TC1000001664.mm.1 | 0.3  | 0.110767 |
| TC0700000153.mm.1 | NM_011124          | Ccl21a  | chemokine (C-C motif) ligand 21A (serine)       | 42772860  | 42773993  | TC0400002506.mm.1 | -1.0 | 0.110779 |
| TC0700000158.mm.1 | ENSMUST00000117005 | Gm24482 | predicted gene, 24482                           | 3425023   | 3425115   | TC1000000004.mm.1 | 0.3  | 0.110793 |
| TC0700000171.mm.1 | NM_001033375       | A230046 | RIKEN cDNA A230046K03 gene                      | 83543941  | 83596473  | TC1000001010.mm.1 | -0.2 | 0.110796 |

|                   |                    |         |                                                 |           |           |                    |      |          |
|-------------------|--------------------|---------|-------------------------------------------------|-----------|-----------|--------------------|------|----------|
| TC0700000181.mm.1 | NM_018857          | Msln    | mesothelin                                      | 25748613  | 25754378  | TC1700001671.mm.1  | 0.1  | 0.110807 |
| TC0700000185.mm.1 | NM_001005421       | Amica1  | adhesion molecule, interacts with CXADR antigen | 45079183  | 45108531  | TC0900000533.mm.1  | -0.1 | 0.110943 |
| TC0700000208.mm.1 | ENSMUST00000157633 | Gm24291 | predicted gene, 24291                           | 113528510 | 113528671 | TC0800002969.mm.1  | 0.1  | 0.111008 |
| TC0700000210.mm.1 | ENSMUST00000120400 | Gm14650 | predicted gene 14650                            | 58630400  | 58631288  | TC0X00002287.mm.1  | -0.2 | 0.111148 |
| TC0700000225.mm.1 | NM_010481          | Hspa9   | heat shock protein 9                            | 34937414  | 34954357  | TC1800001163.mm.1  | 0.3  | 0.111181 |
| TC0700000228.mm.1 | NM_133240          | Acot8   | acyl-CoA thioesterase 8                         | 164792768 | 164804882 | TC02000005132.mm.1 | -0.1 | 0.111182 |
| TC0700000229.mm.1 | ENSMUST00000168236 | Gm17538 | predicted gene, 17538                           | 77674376  | 77674702  | TC1700002546.mm.1  | 0.2  | 0.111247 |
| TC0700000233.mm.1 | NR_002868          | Gm5476  | type II keratin Kb17P pseudogene                | 101587317 | 101588572 | TC1500002265.mm.1  | -0.1 | 0.111252 |
| TC0700000234.mm.1 | NCBI_Gene:629906:p | Ighv1-4 | immunoglobulin heavy variable V1-42             | 114937113 | 114937544 | TC1200002624.mm.1  | -1.3 | 0.111301 |
| TC0700000239.mm.1 | NM_028041          | Ddx54   | DEAD (Asp-Glu-Ala-Asp) box polypeptide 54       | 120613130 | 120628592 | TC0500001342.mm.1  | -0.3 | 0.111431 |
| TC0700000254.mm.1 | ENSMUST00000171531 | Gm2431  | predicted gene 2431                             | 142257647 | 142258354 | TC0700004560.mm.1  | -0.3 | 0.111542 |
| TC0700000258.mm.1 | NM_011829          | Impdh1  | inosine 5-phosphate dehydrogenase 1             | 29200434  | 29216364  | TC0600001974.mm.1  | -0.2 | 0.1116   |
| TC0700000261.mm.1 | NM_009733          | Axin1   | axin 1                                          | 26138686  | 26195811  | TC1700000404.mm.1  | -0.1 | 0.111622 |
| TC0700000266.mm.1 | ENSMUST00000112062 | Gm11084 | predicted gene 11084                            | 72971548  | 72986716  | TC0200003747.mm.1  | -0.4 | 0.111714 |
| TC0700000275.mm.1 | NM_181316          | Bbs9    | Bardet-Biedl syndrome 9 (human)                 | 22475715  | 22888280  | TC0900000223.mm.1  | -0.2 | 0.111743 |
| TC0700000280.mm.1 | XM_001477705       | Lipo4   | lipase, member O4                               | 33498037  | 33517780  | TC1900001773.mm.1  | 0.1  | 0.111795 |
| TC0700000281.mm.1 | NR_028531          | Snord69 | small nucleolar RNA, C/D box 69                 | 31014287  | 31014366  | TC1400001666.mm.1  | -0.9 | 0.111833 |
| TC0700000286.mm.1 | ENSMUST00000175375 | Gm22698 | predicted gene, 22698                           | 98560354  | 98560461  | TC1300001119.mm.1  | 0.3  | 0.111905 |
| TC0700000287.mm.1 | NCBI_Gene:619806:p | Igkv4-5 | Igkv4-51 immunoglobulin kappa chain variable 4  | 69681406  | 69681939  | TC0600003574.mm.1  | -0.7 | 0.112015 |
| TC0700000290.mm.1 | ENSMUST00000104352 | Gm24079 | predicted gene, 24079                           | 62523408  | 62523539  | TC0500002457.mm.1  | -0.2 | 0.112031 |
| TC0700000292.mm.1 | NM_011087          | Pira1   | paired-Ig-like receptor A1                      | 3731630   | 3739889   | TC0700004632.mm.1  | 0.3  | 0.112088 |
| TC0700000294.mm.1 | ENSMUST00000158962 | Gm23339 | predicted gene, 23339                           | 105232605 | 105232743 | TC0600001177.mm.1  | -0.2 | 0.112089 |
| TC0700000296.mm.1 | NM_183358          | Gadd45g | growth arrest and DNA-damage-inducible, gamma   | 84831522  | 84835482  | TC0800000962.mm.1  | -0.1 | 0.112154 |
| TC0700000314.mm.1 | NM_010738          | Ly6a    | lymphocyte antigen 6 complex, locus A           | 74994877  | 74998031  | TC1500001728.mm.1  | 0.6  | 0.112202 |
| TC0700000317.mm.1 | NM_178856          | Gins2   | GINS complex subunit 2 (Psf2 homolog)           | 120578633 | 120589304 | TC0800003037.mm.1  | -0.1 | 0.112203 |
| TC0700000322.mm.1 | ENSMUST00000158045 | Gm23663 | predicted gene, 23663                           | 119746401 | 119746480 | TC1100002009.mm.1  | 0.4  | 0.112238 |
| TC0700000323.mm.1 | NR_030532          | Mir743  | microRNA 743                                    | 66776757  | 66776818  | TC0X00002341.mm.1  | 0.2  | 0.112351 |
| TC0700000325.mm.1 | NM_153136          | Nudt18  | nudix (nucleoside diphosphate linked moiety X)- | 70577847  | 70582571  | TC1400001002.mm.1  | 0.1  | 0.112401 |
| TC0700000327.mm.1 | ENSMUST00000175172 | Gm24085 | predicted gene, 24085                           | 12865125  | 12865240  | TC1700001455.mm.1  | 0.3  | 0.112402 |
| TC0700000328.mm.1 | NR_028548          | Snord16 | small nucleolar RNA, C/D box 16A                | 64175423  | 64175522  | TC0900000812.mm.1  | -1.1 | 0.112461 |
| TC0700000338.mm.1 | NM_172790          | Ankrd52 | ankyrin repeat domain 52                        | 128377115 | 128408704 | TC1000001601.mm.1  | -0.1 | 0.112477 |
| TC0700000343.mm.1 | ENSMUST00000117152 | Gm14086 | predicted gene 14086                            | 122427194 | 122427469 | TC0200001850.mm.1  | -0.2 | 0.112538 |
| TC0700000344.mm.1 | NCBI_Gene:436539:p | Trav6-2 | T cell receptor alpha variable 6-2              | 52667411  | 52667864  | TC1400000620.mm.1  | -0.2 | 0.112579 |
| TC0700000345.mm.1 | NCBI_Gene:628614:p | Ighv1-3 | immunoglobulin heavy variable 1-34              | 114851190 | 114851623 | TC1200002620.mm.1  | -1.2 | 0.112598 |
| TC0700000352.mm.1 | NM_172911          | D8Ertd8 | DNA segment, Chr 8, ERATO Doi 82, expressed     | 36094828  | 36147787  | TC0800000441.mm.1  | 0.1  | 0.112626 |
| TC0700000362.mm.1 | NM_001039170       | Eif4e2  | eukaryotic translation initiation factor 4E mem | 87213914  | 87240488  | TC0100000811.mm.1  | -0.1 | 0.112799 |
| TC0700000364.mm.1 | ENSMUST00000120422 | Gm13787 | predicted gene 13787                            | 91344022  | 91344189  | TC0200004118.mm.1  | -0.1 | 0.112834 |
| TC0700000366.mm.1 | ENSMUST00000074205 | Rps6-ps | ribosomal protein S6, pseudogene 1              | 76337616  | 76338365  | TC1500000586.mm.1  | -0.6 | 0.112993 |
| TC0700000371.mm.1 | ENSMUST00000121855 | Gm12834 | predicted gene 12834                            | 115238754 | 115241582 | TC04000003315.mm.1 | -0.3 | 0.113232 |
| TC0700000374.mm.1 | ENSMUST00000063197 | Gm5867  | predicted gene 5867                             | 69461151  | 69461741  | TC0500000660.mm.1  | -0.2 | 0.113233 |
| TC0700000381.mm.1 | ENSMUST00000179641 | Gm22450 | predicted gene, 22450                           | 135875657 | 135875763 | TC0500001589.mm.1  | -0.8 | 0.11325  |
| TC0700000383.mm.1 | NM_010911          | Nfs1    | nitrogen fixation gene 1 (S. cerevisiae)        | 156123637 | 156144186 | TC02000005512.mm.1 | 0.2  | 0.11326  |
| TC0700000384.mm.1 | ENSMUST00000104359 | Gm22019 | predicted gene, 22019                           | 141181216 | 141181311 | TC0700004524.mm.1  | 0.2  | 0.113276 |
| TC0700000386.mm.1 | NM_001163246       | AA98716 | expressed sequence AA987161                     | 67589439  | 67609707  | TC1300002253.mm.1  | -0.3 | 0.113302 |
| TC0700000387.mm.1 | NM_181401          | Tmem64  | transmembrane protein 64                        | 15265820  | 15286753  | TC0400000133.mm.1  | 0.2  | 0.113316 |
| TC0700000388.mm.1 | ENSMUST00000157988 | Gm23411 | predicted gene, 23411                           | 34188878  | 34188939  | TC0800001145.mm.1  | 0.2  | 0.113364 |
| TC0700000399.mm.1 | NCBI_Gene:633740:p | Trav5-1 | Trav5-1 T cell receptor alpha variable 5-1      | 52622566  | 52623082  | TC1400000617.mm.1  | -0.2 | 0.113397 |
| TC0700000402.mm.1 | ENSMUST00000157876 | Gm22788 | predicted gene, 22788                           | 34024220  | 34024280  | TC1800001143.mm.1  | 0.2  | 0.113459 |
| TC0700000405.mm.1 | ENSMUST00000169025 | Gm4202  | predicted gene 4202                             | 92689425  | 92690163  | TC0300000833.mm.1  | -0.3 | 0.1137   |
| TC0700000407.mm.1 | NM_008644          | Pro1    | proline rich, lacrimal 1                        | 88317312  | 88328817  | TC0500000809.mm.1  | -0.9 | 0.113728 |
| TC0700000410.mm.1 | NCBI_Gene:238448:p | Ighv1-6 | immunoglobulin heavy variable 1-62-2            | 115446409 | 115446710 | TC0200002640.mm.1  | -1.1 | 0.113735 |
| TC0700000413.mm.1 | NCBI_Gene:619886:p | Ighv1-7 | immunoglobulin heavy variable 1-71              | 115742205 | 115742506 | TC1200002649.mm.1  | -1.1 | 0.113735 |
| TC0700000421.mm.1 | ENSMUST00000121131 | Gm14922 | predicted gene 14922                            | 112773953 | 112774115 | TC0X00002874.mm.1  | -0.2 | 0.113739 |
| TC0700000423.mm.1 | ENSMUST00000082499 | Gm25586 | predicted gene, 25586                           | 29280964  | 29281075  | TC0100002109.mm.1  | 0.1  | 0.11383  |
| TC0700000424.mm.1 | NM_028870          | Cltb    | clathrin, light polypeptide (Lcb)               | 54592401  | 54611344  | TC1300002037.mm.1  | 0.2  | 0.113834 |
| TC0700000429.mm.1 | NM_001083891       | Ndufv3  | NADH dehydrogenase (ubiquinone) flavoprotein    | 31520115  | 31531326  | TC1700000539.mm.1  | 0.3  | 0.11398  |
| TC0700000439.mm.1 | ENSMUST00000175135 | mmu-mir | mmu-mir-9-1                                     | 88215589  | 88215696  | TC0300002303.mm.1  | 0.2  | 0.113988 |
| TC0700000445.mm.1 | NM_172148          | B9d2    | B9 protein domain 2                             | 25680780  | 25686558  | TC0700000423.mm.1  | -0.2 | 0.114135 |
| TC0700000447.mm.1 | NM_181818          | Olfr141 | olfactory receptor 141                          | 86806021  | 86806997  | TC0200003957.mm.1  | 0.1  | 0.114224 |
| TC0700000457.mm.1 | ENSMUST00000104402 | Gm26015 | predicted gene, 26015                           | 65405846  | 65405970  | TC1200001836.mm.1  | 0.1  | 0.114232 |
| TC0700000458.mm.1 | NR_037682          | Snord42 | small nucleolar RNA, C/D box 42A                | 78181299  | 78181363  | TC1100003289.mm.1  | -0.9 | 0.11424  |
| TC0700000460.mm.1 | ENSMUST00000082713 | Gm23301 | predicted gene, 23301                           | 75001455  | 75001519  | TC1800000799.mm.1  | -0.8 | 0.1143   |
| TC0700000476.mm.1 | NM_011419          | Kdm5d   | lysine (K)-specific demethylase 5D              | 897788    | 956781    | TC0Y00000005.mm.1  | -0.1 | 0.114329 |
| TC0700000484.mm.1 | NM_138747          | Nop2    | NOP2 nucleolar protein                          | 125131883 | 125144753 | TC0600001448.mm.1  | -0.2 | 0.114424 |
| TC0700000485.mm.1 | NM_199465          | Nexn    | nexilin                                         | 152236982 | 152266320 | TC0300003140.mm.1  | 0.1  | 0.114456 |
| TC0700000488.mm.1 | ENSMUST00000182354 | Gm9578  | predicted gene 9578                             | 80341733  | 80342485  | TC1400002498.mm.1  | -0.1 | 0.114495 |
| TC0700000494.mm.1 | ENSMUST00000104780 | Gm26260 | predicted gene, 26260                           | 119558303 | 119558394 | TC1000001471.mm.1  | 0.5  | 0.114597 |
| TC0700000495.mm.1 | ENSMUST00000103811 | Gm22426 | predicted gene, 22426                           | 105574687 | 105574782 | TC0100001006.mm.1  | -0.3 | 0.114687 |
| TC0700000496.mm.1 | NM_011089          | Pira2   | paired-Ig-like receptor A2                      | 3836810   | 3898125   | TC0700004634.mm.1  | 0.2  | 0.114697 |
| TC0700000501.mm.1 | NM_172760          | Elmo3   | engulfment and cell motility 3                  | 105305601 | 105310623 | TC0800001213.mm.1  | 0.1  | 0.114781 |
| TC0700000504.mm.1 | ENSMUST00000120952 | Gm13998 | predicted gene 13998                            | 119878069 | 119878403 | TC0200004450.mm.1  | -0.5 | 0.114836 |
| TC0700000509.mm.1 | ENSMUST00000104497 | Gm22498 | predicted gene, 22498                           | 56837071  | 56837156  | TC1400002134.mm.1  | -0.2 | 0.114921 |
| TC0700000510.mm.1 | NR_028552          | Snord58 | small nucleolar RNA, C/D box 58B                | 75001058  | 75001123  | TC1800000798.mm.1  | -1.2 | 0.114937 |
| TC0700000512.mm.1 | NM_015816          | Lsm4    | LSM4 homolog, U6 small nuclear RNA associat     | 70673231  | 70678752  | TC0800000759.mm.1  | -0.2 | 0.114973 |
| TC0700000519.mm.1 | NM_023331          | Mrp146  | mitochondrial ribosomal protein L46             | 78775236  | 78783531  | TC07000003547.mm.1 | -0.1 | 0.115067 |
| TC0700000525.mm.1 | ENSMUST00000119046 | Gm15808 | predicted gene 15808                            | 14067403  | 14068006  | TC1600000172.mm.1  | -0.2 | 0.115094 |
| TC0700000526.mm.1 | ENSMUST00000158006 | Gm22311 | predicted gene, 22311                           | 83764638  | 83764747  | TC1100003403.mm.1  | 0.2  | 0.115229 |
| TC0700000539.mm.1 | NM_011882          | Rnasel  | ribonuclease L (2, 5-oligoadenylate syntheta    | 153749426 | 153764221 | TC0100001382.mm.1  | 0.2  | 0.115262 |

|                   |                    |         |                                                 |           |           |                    |      |          |
|-------------------|--------------------|---------|-------------------------------------------------|-----------|-----------|--------------------|------|----------|
| TC0700000548.mm.1 | ENSMUST00000120372 | Gm12990 | predicted gene 12990                            | 135403189 | 135403656 | TC0400003763.mm.1  | -0.4 | 0.115265 |
| TC0700000551.mm.1 | ENSMUST00000121496 | Gm12779 | predicted gene 12779                            | 34068555  | 34068746  | TC0700002824.mm.1  | -0.2 | 0.115551 |
| TC0700000552.mm.1 | NM_199317          | Phf16   | PHD finger protein 16                           | 20425688  | 20519939  | TC0X00000207.mm.1  | -0.2 | 0.115581 |
| TC0700000555.mm.1 | NM_001033534       | Layn    | layilin                                         | 51054640  | 51077094  | TC0900002283.mm.1  | 0.2  | 0.115763 |
| TC0700000561.mm.1 | NM_172590          | Wdr41   | WD repeat domain 41                             | 94976344  | 95023316  | TC1300001069.mm.1  | 0.2  | 0.115766 |
| TC0700000562.mm.1 | NM_178706          | Siglech | sialic acid binding Ig-like lectin H            | 55768178  | 55778925  | TC0700000931.mm.1  | -0.1 | 0.11613  |
| TC0700000572.mm.1 | ENSMUST00000158750 | Snord10 | small nucleolar RNA, C/D box 107                | 59980876  | 59980945  | TC0700003347.mm.1  | 0.2  | 0.11613  |
| TC0700000576.mm.1 | NR_027357          | Slc25a4 | solute carrier family 25, member 44             | 88410494  | 88425141  | TC0300002311.mm.1  | 0.3  | 0.116155 |
| TC0700000591.mm.1 | NM_178385          | Tbcc    | tubulin-specific chaperone C                    | 46890621  | 46892463  | TC1700000904.mm.1  | -0.2 | 0.116158 |
| TC0700000595.mm.1 | NCBI_Gene:629925:p | Ighv1-4 | immunoglobulin heavy variable 1-49              | 115055223 | 115055516 | TC1200002481.mm.1  | -0.3 | 0.11617  |
| TC0700000596.mm.1 | NM_008132          | Glrp1   | glutamine repeat protein 1                      | 88499871  | 88510066  | TC0100002775.mm.1  | 0.1  | 0.116252 |
| TC0700000597.mm.1 | ENSMUST00000177868 | Gm24497 | predicted gene, 24497                           | 72244213  | 72244403  | TC0100000599.mm.1  | -1.0 | 0.116304 |
| TC0700000598.mm.1 | ENSMUST00000101806 | Gm23472 | predicted gene, 23472                           | 72236946  | 72237136  | TC0100000598.mm.1  | -1.0 | 0.116488 |
| TC0700000600.mm.1 | ENSMUST00000082922 | Gm23444 | predicted gene, 23444                           | 83271498  | 83271688  | TC1100001245.mm.1  | -1.0 | 0.116488 |
| TC0700000601.mm.1 | ENSMUST00000089101 | Gm6358  | predicted gene 6358                             | 89140944  | 89141099  | TC1600000971.mm.1  | -0.4 | 0.116519 |
| TC0700000602.mm.1 | ENSMUST00000185141 | RP23-26 | N/A                                             | 14991920  | 14992298  | TC0700002397.mm.1  | -0.1 | 0.116593 |
| TC0700000603.mm.1 | ENSMUST00000118450 | Gm11516 | predicted gene 11516                            | 90859767  | 90861348  | TC1100003541.mm.1  | -0.2 | 0.116594 |
| TC0700000604.mm.1 | XR_140969          | Gm10615 | predicted gene 10615                            | 110117703 | 110120335 | TC0900001452.mm.1  | -0.1 | 0.116672 |
| TC0700000606.mm.1 | NM_027264          | Zfp715  | zinc finger protein 715                         | 43296197  | 43313294  | TC0700002944.mm.1  | -0.1 | 0.116811 |
| TC0700000608.mm.1 | ENSMUST00000157811 | Gm25382 | predicted gene, 25382                           | 17116804  | 17116900  | TC1000000119.mm.1  | 0.2  | 0.116836 |
| TC0700000611.mm.1 | NM_030749          | Sil1    | endoplasmic reticulum chaperone SIL1 homolog    | 35266396  | 35498925  | TC1800001171.mm.1  | 0.2  | 0.116885 |
| TC0700000613.mm.1 | ENSMUST00000083370 | Gm23245 | predicted gene, 23245                           | 129789539 | 129789673 | TC0500001513.mm.1  | -0.8 | 0.116908 |
| TC0700000621.mm.1 | NR_039584          | Mir5123 | microRNA 5123                                   | 40850056  | 40850138  | TC0400002450.mm.1  | 0.4  | 0.117068 |
| TC0700000623.mm.1 | NM_080553          | Itpr3   | inositol 1,4,5-triphosphate receptor 3          | 27057304  | 27122223  | TC1700000431.mm.1  | -0.2 | 0.117074 |
| TC0700000628.mm.1 | NM_019649          | Clptm1  | cleft lip and palate associated transmembrane p | 19631580  | 19665030  | TC0700002492.mm.1  | 0.2  | 0.117129 |
| TC0700000629.mm.1 | NM_001146047       | Lrrc49  | leucine rich repeat containing 49               | 60568859  | 60688158  | TC0900002435.mm.1  | 0.1  | 0.117189 |
| TC0700000630.mm.1 | NM_001164205       | Tsen34  | tRNA splicing endonuclease 34 homolog (S. cere' | 3693375   | 3701035   | TC0700000018.mm.1  | 0.1  | 0.117307 |
| TC0700000635.mm.1 | NM_023277          | Jam3    | junction adhesion molecule 3                    | 27097384  | 27155421  | TC0900001946.mm.1  | 0.1  | 0.117403 |
| TC0700000649.mm.1 | ENSMUST00000119949 | Gm3788  | predicted gene 3788                             | 86672033  | 86672168  | TC0300002269.mm.1  | -0.8 | 0.117405 |
| TC0700000656.mm.1 | NM_052835          | Rpl10   | ribosomal protein L10                           | 74270812  | 74273135  | TC0X00000704.mm.1  | -0.1 | 0.117424 |
| TC0700000663.mm.1 | NM_146075          | Lemd2   | LEM domain containing 2                         | 27189600  | 27204438  | TC1700001718.mm.1  | -0.1 | 0.117432 |
| TC0700000671.mm.1 | ENSMUST00000104805 | Mir466f | microRNA 466f-2                                 | 10468675  | 10468768  | TC0200000097.mm.1  | 0.3  | 0.117516 |
| TC0700000674.mm.1 | ENSMUST00000083804 | Gm24494 | predicted gene, 24494                           | 153911610 | 153911690 | TC0300003172.mm.1  | -0.7 | 0.117553 |
| TC0700000675.mm.1 | ENSMUST00000082422 | mt-Tt   | mitochondrially encoded tRNA threonine          | 15289     | 15355     | TC0M000000017.mm.1 | 0.5  | 0.117573 |
| TC0700000676.mm.1 | ENSMUST00000176094 | Vmn2r-p | vomeronasal 2, receptor, pseudogene 131         | 23147806  | 23150676  | TC1700000308.mm.1  | -0.2 | 0.117626 |
| TC0700000695.mm.1 | NM_009117          | Saa1    | serum amyloid A 1                               | 46740499  | 46742980  | TC0700003041.mm.1  | -0.3 | 0.117626 |
| TC0700000696.mm.1 | NM_013589          | Ltbp2   | latent transforming growth factor beta binding  | 84783212  | 84876532  | TC1200002082.mm.1  | 0.1  | 0.117831 |
| TC0700000697.mm.1 | NM_028419          | Glrx5   | glutaredoxin 5 homolog (S. cerevisiae)          | 105032669 | 105040910 | TC1200001051.mm.1  | 0.2  | 0.117949 |
| TC0700000698.mm.1 | ENSMUST00000118143 | Gm16425 | predicted gene 16425                            | 19535904  | 19538583  | TC0800000190.mm.1  | -0.1 | 0.118029 |
| TC0700000701.mm.1 | NM_025673          | Golph3  | golgi phosphoprotein 3                          | 12321496  | 12351594  | TC1500000104.mm.1  | -0.1 | 0.118103 |
| TC0700000702.mm.1 | NR_004414          | Rnu2-10 | U2 small nuclear RNA 10                         | 0         | 0         | TSUnmapped0000018  | -1.0 | 0.118268 |
| TC0700000708.mm.1 | NM_025596          | Prelid1 | PRELI domain containing 1                       | 55322055  | 55325272  | TC1300000655.mm.1  | -0.3 | 0.118411 |
| TC0700000718.mm.1 | ENSMUST00000082399 | mt-Tn   | mitochondrially encoded tRNA asparagine         | 5089      | 5159      | TC0M000000022.mm.1 | -0.8 | 0.11848  |
| TC0700000720.mm.1 | NM_025620          | Rep15   | RAB15 effector protein                          | 147032537 | 147033518 | TC0600001741.mm.1  | -0.2 | 0.118681 |
| TC0700000724.mm.1 | NM_007861          | Dld     | dihydrolipoamide dehydrogenase                  | 31331562  | 31351471  | TC1200001593.mm.1  | 0.3  | 0.118784 |
| TC0700000731.mm.1 | ENSMUST00000120114 | Olfr137 | olfactory receptor 1374, pseudogene 1           | 51142532  | 51143467  | TC1100000563.mm.1  | 0.1  | 0.118819 |
| TC0700000733.mm.1 | NCBI_Gene:620140:p | Ighv1-8 | immunoglobulin heavy variable 1-83              | 115963793 | 115964196 | TC1200002662.mm.1  | -1.1 | 0.118963 |
| TC0700000735.mm.1 | ENSMUST00000099947 | Gm13691 | predicted gene 13691                            | 83990553  | 83993045  | TC0200001212.mm.1  | -0.3 | 0.118969 |
| TC0700000745.mm.1 | ENSMUST00000082838 | Gm25202 | predicted gene, 25202                           | 14315401  | 14315591  | TC0X00001881.mm.1  | -0.7 | 0.119146 |
| TC0700000748.mm.1 | NM_175436          | Zfp526  | zinc finger protein 526                         | 25221451  | 25227507  | TC0700000407.mm.1  | -0.1 | 0.119166 |
| TC0700000749.mm.1 | NM_145519          | Farp2   | FERM, RhoGEF and pleckstrin domain protein 2    | 93512079  | 93621976  | TC0100000937.mm.1  | 0.1  | 0.119173 |
| TC0700000753.mm.1 | NM_011919          | Ing1    | inhibitor of growth family, member 1            | 11555855  | 11563250  | TC0800000091.mm.1  | -0.2 | 0.119354 |
| TC0700000754.mm.1 | XR_140755          | Gm15753 | predicted gene 15753                            | 137720333 | 137721740 | TC0500003460.mm.1  | -0.5 | 0.119429 |
| TC0700000755.mm.1 | NM_138603          | Ccdc22  | coiled-coil domain containing 22                | 7593809   | 7605517   | TC0X00003412.mm.1  | -0.1 | 0.119505 |
| TC0700000759.mm.1 | NM_029632          | Ppp1r11 | protein phosphatase 1, regulatory (inhibitor) s | 36948355  | 36951792  | TC1700002041.mm.1  | -0.1 | 0.119679 |
| TC0700000768.mm.1 | NM_001033238       | Cblb    | Casitas B-lineage lymphoma b                    | 52031549  | 52208047  | TC1600000726.mm.1  | 0.2  | 0.119703 |
| TC0700000771.mm.1 | NM_009390          | Tll1    | tolloid-like                                    | 64014770  | 64205993  | TC0800002307.mm.1  | 0.1  | 0.119802 |
| TC0700000775.mm.1 | NM_001044741       | Cacnb3  | calcium channel, voltage-dependent, beta 3 subu | 98632220  | 98644536  | TC1500000982.mm.1  | -0.1 | 0.119815 |
| TC0700000782.mm.1 | NM_011149          | Ppiib   | peptidylprolyl isomerase B                      | 66060169  | 66066629  | TC0900000862.mm.1  | -0.2 | 0.119877 |
| TC0700000783.mm.1 | NM_133976          | Imp3    | IMP3, U3 small nucleolar ribonucleoprotein, hon | 56937475  | 56938398  | TC0900000689.mm.1  | -0.3 | 0.119927 |
| TC0700000784.mm.1 | NM_172393          | Aim1    | absent in melanoma 1                            | 43950307  | 44004846  | TC1000002093.mm.1  | -0.1 | 0.120291 |
| TC0700000785.mm.1 | ENSMUST00000179708 | Gm22286 | predicted gene, 22286                           | 47525616  | 47525722  | TC0900002230.mm.1  | -0.7 | 0.120322 |
| TC0700000786.mm.1 | NM_024465          | Abhd12  | abhydrolase domain containing 12                | 150832493 | 150904741 | TC0200004848.mm.1  | 0.2  | 0.120334 |
| TC0700000787.mm.1 | ENSMUST00000109711 | Ighv1-2 | immunoglobulin heavy variable 1-2               | 114469105 | 114469227 | TC1200002598.mm.1  | -1.1 | 0.120458 |
| TC0700000788.mm.1 | ENSMUST00000182391 | Gm26913 | predicted gene, 26913                           | 84690210  | 84690941  | TC1300002377.mm.1  | -0.1 | 0.120495 |
| TC0700000789.mm.1 | NM_001290013       | Pemt    | phosphatidylethanolamine N-methyltransferase    | 0         | 0         | TSUnmapped0000003  | 0.2  | 0.120543 |
| TC0700000790.mm.1 | ENSMUST00000120788 | Gm12791 | predicted gene 12791                            | 101875347 | 101876001 | TC0400001041.mm.1  | -0.3 | 0.120548 |
| TC0700000791.mm.1 | NM_001167891       | Nrg2    | neuregulin 2                                    | 36017649  | 36197380  | TC1800001186.mm.1  | -0.1 | 0.120566 |
| TC0700000792.mm.1 | XM_357202          | Gm13637 | predicted gene 13637                            | 72570451  | 72570822  | TC0200003740.mm.1  | -0.3 | 0.120726 |
| TC0700000793.mm.1 | ENSMUST00000119463 | Gm12844 | predicted gene 12844                            | 117728718 | 117729299 | TC0400003374.mm.1  | -0.2 | 0.120958 |
| TC0700000794.mm.1 | ENSMUST00000178572 | Gm5225  | predicted gene 5225                             | 24023859  | 24024182  | TC1700000331.mm.1  | -0.2 | 0.121336 |
| TC0700000795.mm.1 | NM_025947          | Dynlrb1 | dynein light chain roadblock-type 1             | 155236533 | 155250277 | TC0200002362.mm.1  | 0.3  | 0.12134  |
| TC0700000796.mm.1 | ENSMUST00000083973 | Gm26108 | predicted gene, 26108                           | 110622832 | 110623022 | TC0X00002861.mm.1  | -0.3 | 0.12134  |
| TC0700000799.mm.1 | NM_021501          | Pias4   | protein inhibitor of activated STAT 4           | 81153266  | 81167923  | TC1000002527.mm.1  | -0.1 | 0.121473 |
| TC0700000810.mm.1 | NM_015736          | Galnt3  | UDP-N-acetyl-alpha-D-galactosamine:polypeptid   | 66082766  | 66124994  | TC0200003670.mm.1  | -0.2 | 0.121497 |
| TC0700000811.mm.1 | NM_026604          | Fam135a | family with sequence similarity 135, member A   | 24010758  | 24100341  | TC0100002071.mm.1  | 0.2  | 0.121537 |
| TC0700000819.mm.1 | NR_002702          | Npm3-ps | nucleoplamin 3, pseudogene 1                    | 85076141  | 85077126  | TC0600000954.mm.1  | -0.2 | 0.121546 |
| TC0700000839.mm.1 | NM_001169131       | Papd7   | PAP associated domain containing 7              | 69497959  | 69533864  | TC1300002274.mm.1  | -0.2 | 0.121616 |

|                   |                    |         |                                                 |           |           |                   |      |          |
|-------------------|--------------------|---------|-------------------------------------------------|-----------|-----------|-------------------|------|----------|
| TC0700000840.mm.1 | NM_019990          | Stard10 | START domain containing 10                      | 101317086 | 101346626 | TC0700001430.mm.1 | -0.1 | 0.121653 |
| TC0700000860.mm.1 | NCBI_Gene:620050:p | Igkv12- | immunoglobulin kappa chain variable 12-38       | 69943186  | 69943648  | TC0600002445.mm.1 | -0.2 | 0.121751 |
| TC0700000861.mm.1 | ENSMUST00000122737 | Gm22027 | predicted gene, 22027                           | 96176361  | 96176487  | TC0300000927.mm.1 | -0.3 | 0.121789 |
| TC0700000876.mm.1 | NM_001122675       | Zcchc2  | zinc finger, CCHC domain containing 2           | 105990406 | 106034079 | TC0100001016.mm.1 | -0.1 | 0.121827 |
| TC0700000878.mm.1 | XR_140947          | Gm19279 | predicted gene, 19279                           | 66885918  | 66886948  | TC0900002535.mm.1 | -0.1 | 0.121827 |
| TC0700000879.mm.1 | ENSMUST00000056948 | Gm7887  | predicted gene 7887                             | 48524372  | 48525105  | TC0600002223.mm.1 | -0.1 | 0.121831 |
| TC0700000880.mm.1 | BC099486           | Gm19924 | predicted gene, 19924                           | 20451675  | 20459211  | TC1200000177.mm.1 | -0.2 | 0.121851 |
| TC0700000886.mm.1 | ENSMUST00000178454 | Gm10590 | predicted gene 10590                            | 42714926  | 42719893  | TC0400000416.mm.1 | 0.2  | 0.121949 |
| TC0700000888.mm.1 | NM_012001          | Cops4   | COP9 (constitutive photomorphogenic) homolog    | 100518309 | 100547803 | TC0500000981.mm.1 | -0.1 | 0.122474 |
| TC0700000894.mm.1 | NM_008020          | Fkbp2   | FK506 binding protein 2                         | 6977739   | 6980461   | TC1900001026.mm.1 | 0.2  | 0.122515 |
| TC0700000903.mm.1 | BC147450           | Gm6899  | predicted gene 6899                             | 26593241  | 26593862  | TC1100000266.mm.1 | 0.1  | 0.122751 |
| TC0700000904.mm.1 | ENSMUST00000153140 | Gm16060 | predicted pseudogene 16060                      | 138828685 | 138829162 | TC0300003022.mm.1 | -0.5 | 0.122765 |
| TC0700000916.mm.1 | NR_004412          | Rnu1b1  | U1b1 small nuclear RNA                          | 96359953  | 96360117  | TC0300002508.mm.1 | -0.7 | 0.122843 |
| TC0700000918.mm.1 | ENSMUST00000158921 | Gm25839 | predicted gene, 25839                           | 61470441  | 61470543  | TC0100000495.mm.1 | 0.3  | 0.122845 |
| TC0700000920.mm.1 | NCBI_Gene:629826:p | Ighv14- | immunoglobulin heavy variable 14-4              | 114176438 | 114176867 | TC1200002586.mm.1 | -1.0 | 0.122874 |
| TC0700000931.mm.1 | NM_009728          | Atp10a  | ATPase, class V, type 10A                       | 58658202  | 58829426  | TC0700000946.mm.1 | -0.3 | 0.123154 |
| TC0700000935.mm.1 | NM_207631          | Olfr132 | olfactory receptor 1321                         | 49726944  | 49727999  | TC0X00002176.mm.1 | -0.1 | 0.123181 |
| TC0700000936.mm.1 | NM_001037925       | BC14752 | cDNA sequence BC147527                          | 120300392 | 120308843 | TC1300001366.mm.1 | -0.2 | 0.123183 |
| TC0700000939.mm.1 | NR_024200          | Rnu1b2  | U1b2 small nuclear RNA                          | 0         | 0         | TSUnmapped0000017 | -0.7 | 0.123183 |
| TC0700000945.mm.1 | NR_004412          | Rnu1b1  | U1b1 small nuclear RNA                          | 0         | 0         | TSUnmapped0000018 | -0.7 | 0.123183 |
| TC0700000946.mm.1 | NM_025319          | 610009  | RIKEN cDNA 0610009B22 gene                      | 51685384  | 51688874  | TC1100002698.mm.1 | 0.2  | 0.123198 |
| TC0700000954.mm.1 | ENSMUST00000083448 | Gm23097 | predicted gene, 23097                           | 6706342   | 6706446   | TC0900001714.mm.1 | 0.1  | 0.123242 |
| TC0700000961.mm.1 | NM_001113248       | Sin3b   | transcriptional regulator, SIN3B (yeast)        | 72723270  | 72758203  | TC0800000834.mm.1 | -0.2 | 0.123277 |
| TC0700000963.mm.1 | ENSMUST00000178300 | Gm22614 | predicted gene, 22614                           | 96488729  | 96488893  | TC0300000947.mm.1 | -0.6 | 0.123476 |
| TC0700000964.mm.1 | ENSMUST00000177643 | Gm25890 | predicted gene, 25890                           | 96486555  | 96486719  | TC0300002518.mm.1 | -0.6 | 0.123476 |
| TC0700000967.mm.1 | ENSMUST00000104569 | Gm23532 | predicted gene, 23532                           | 52959351  | 52959462  | TC0500002416.mm.1 | -0.2 | 0.123498 |
| TC0700000969.mm.1 | ENSMUST00000122018 | Gm13719 | predicted gene 13719                            | 86325641  | 86328569  | TC0200003928.mm.1 | -0.1 | 0.123566 |
| TC0700000979.mm.1 | NM_008009          | Fgfbp1  | fibroblast growth factor binding protein 1      | 43978858  | 43981799  | TC0500002319.mm.1 | 0.2  | 0.123568 |
| TC0700000986.mm.1 | ENSMUST00000118840 | Gm14933 | predicted gene 14933                            | 96358704  | 96359681  | TC0X00002678.mm.1 | -0.4 | 0.123584 |
| TC0700000990.mm.1 | ENSMUST00000062591 | Gm7204  | predicted pseudogene 7204                       | 48218605  | 48219204  | TC1600000691.mm.1 | -0.3 | 0.12363  |
| TC0700000991.mm.1 | ENSMUST00000056409 | Cflar   | CASP8 and FADD-like apoptosis regulator         | 39357394  | 39359128  | TC0300001892.mm.1 | 0.3  | 0.123657 |
| TC0700000995.mm.1 | NM_175111          | Hspbap1 | Hspb associated protein 1                       | 35770386  | 35828462  | TC1600000494.mm.1 | -0.1 | 0.123681 |
| TC0700000997.mm.1 | NM_031249          | Cstf2t  | cleavage stimulation factor, 3 pre-RNA subunit  | 31082841  | 31086592  | TC1900000460.mm.1 | -0.2 | 0.123714 |
| TC0700001045.mm.1 | ENSMUST00000158973 | Gm26158 | predicted gene, 26158                           | 60775521  | 60775639  | TC1900001751.mm.1 | -0.3 | 0.123723 |
| TC0700001056.mm.1 | NR_027677          | E2f6    | E2F transcription factor 6                      | 16810965  | 16839742  | TC1200000132.mm.1 | 0.1  | 0.12373  |
| TC0700001064.mm.1 | ENSMUST00000119037 | Gm12986 | predicted gene 12986                            | 136608840 | 136609864 | TC0400003788.mm.1 | -0.2 | 0.12377  |
| TC0700001075.mm.1 | ENSMUST00000053212 | Gm4895  | predicted gene 4895                             | 22153280  | 22154416  | TC1000001853.mm.1 | 0.2  | 0.123861 |
| TC0700001093.mm.1 | NM_007535          | Bcl2a1c | B cell leukemia/lymphoma 2 related protein A1c  | 114330135 | 114330578 | TC0900001511.mm.1 | -0.1 | 0.123884 |
| TC0700001098.mm.1 | ENSMUST00000116946 | Gm22032 | predicted gene, 22032                           | 17591566  | 17591681  | TC1500001251.mm.1 | 0.3  | 0.123933 |
| TC0700001116.mm.1 | NM_146009          | Cep290  | centrosomal protein 290                         | 100488289 | 100573655 | TC1000001224.mm.1 | -0.1 | 0.124002 |
| TC0700001122.mm.1 | NM_026473          | Tubb6   | tubulin, beta 6 class V                         | 67390717  | 67402749  | TC1600000704.mm.1 | -0.2 | 0.124045 |
| TC0700001131.mm.1 | NM_153804          | Plekhh3 | pleckstrin homology domain containing, family C | 76533560  | 76579042  | TC1200000682.mm.1 | 0.1  | 0.124056 |
| TC0700001140.mm.1 | ENSMUST00000174580 | Gm20411 | predicted gene 20411                            | 9156853   | 9158528   | TC0700002282.mm.1 | 0.2  | 0.124094 |
| TC0700001141.mm.1 | NM_001134646       | Tomm5   | translocase of outer mitochondrial membrane 5   | 45105208  | 45108114  | TC0400002572.mm.1 | -0.2 | 0.124097 |
| TC0700001145.mm.1 | ENSMUST00000119934 | Gm13800 | predicted gene 13800                            | 96071529  | 96071694  | TC0200001469.mm.1 | 0.3  | 0.124249 |
| TC0700001149.mm.1 | ENSMUST00000175175 | Gm24082 | predicted gene, 24082                           | 138606699 | 138606781 | TC0500003659.mm.1 | -0.2 | 0.124402 |
| TC0700001152.mm.1 | ENSMUST00000158481 | Gm23116 | predicted gene, 23116                           | 14382807  | 14382873  | TC1600000180.mm.1 | -0.7 | 0.124449 |
| TC0700001156.mm.1 | NM_001162989       | Phax    | phosphorylated adaptor for RNA export           | 56562443  | 56587712  | TC1800000566.mm.1 | -0.1 | 0.124511 |
| TC0700001160.mm.1 | NM_134100          | Mfsd5   | major facilitator superfamily domain containing | 102279456 | 102281754 | TC1500001093.mm.1 | 0.2  | 0.12456  |
| TC0700001169.mm.1 | ENSMUST00000104203 | Gm24336 | predicted gene, 24336                           | 44113979  | 44114124  | TC1900001554.mm.1 | -0.7 | 0.124644 |
| TC0700001177.mm.1 | ENSMUST00000165702 | Gm17138 | predicted gene 17138                            | 86714986  | 86715444  | TC1200000857.mm.1 | -0.3 | 0.124715 |
| TC0700001180.mm.1 | NM_134024          | Tubg1   | tubulin, gamma 1                                | 101119938 | 101126419 | TC1100001642.mm.1 | -0.3 | 0.124734 |
| TC0700001194.mm.1 | ENSMUST00000122572 | Gm24183 | predicted gene, 24183                           | 55085565  | 55085657  | TC1800001352.mm.1 | -0.2 | 0.124794 |
| TC0700001196.mm.1 | NM_080556          | Tm9sf2  | transmembrane 9 superfamily member 2            | 122107038 | 122159604 | TC1400001327.mm.1 | 0.2  | 0.124823 |
| TC0700001201.mm.1 | NM_011314          | Saa2    | serum amyloid A 2                               | 46751833  | 46754314  | TC0700000878.mm.1 | -0.1 | 0.124937 |
| TC0700001258.mm.1 | ENSMUST00000122364 | Gm10156 | predicted gene 10156                            | 107863039 | 107863500 | TC0700001584.mm.1 | -0.6 | 0.124969 |
| TC0700001262.mm.1 | ENSMUST00000058881 | Gm5341  | predicted pseudogene 5341                       | 90107477  | 90107968  | TC0700003721.mm.1 | -0.2 | 0.125018 |
| TC0700001264.mm.1 | ENSMUST00000119540 | Gm12432 | predicted gene 12432                            | 98846339  | 98846524  | TC0300002564.mm.1 | -0.2 | 0.125047 |
| TC0700001268.mm.1 | ENSMUST00000104420 | Gm22671 | predicted gene, 22671                           | 163054818 | 163054951 | TC0100003408.mm.1 | 0.1  | 0.125075 |
| TC0700001279.mm.1 | ENSMUST00000121895 | Gm15989 | predicted gene 15989                            | 110905244 | 110905741 | TC0500001155.mm.1 | -0.3 | 0.125121 |
| TC0700001291.mm.1 | ENSMUST00000174965 | Gm24510 | predicted gene, 24510                           | 90262552  | 90262645  | TC1700001330.mm.1 | 0.3  | 0.125206 |
| TC0700001317.mm.1 | NCBI_Gene:668497:p | Ighv1-2 | immunoglobulin heavy variable V1-20             | 114723772 | 114724205 | TC1200002613.mm.1 | -0.8 | 0.125237 |
| TC0700001325.mm.1 | NM_023154          | Ethe1   | ethylmalonic encephalopathy 1                   | 24587543  | 24608926  | TC0700000388.mm.1 | -0.2 | 0.12528  |
| TC0700001347.mm.1 | NCBI_Gene:780801:p | Ighv14- | immunoglobulin heavy variable 14-1              | 113931953 | 113932382 | TC1200002576.mm.1 | -1.0 | 0.125328 |
| TC0700001349.mm.1 | ENSMUST00000179093 | Gm26378 | predicted gene, 26378                           | 32820693  | 32820799  | TC1800000264.mm.1 | -0.7 | 0.125366 |
| TC0700001350.mm.1 | ENSMUST00000117365 | Gm4784  | predicted gene 4784                             | 109388744 | 109392165 | TC0X00002860.mm.1 | -0.3 | 0.125392 |
| TC0700001354.mm.1 | NM_011124          | Ccl21a  | chemokine (C-C motif) ligand 21A (serine)       | 120655    | 121788    | TC4_JH584294_rand | -0.9 | 0.1254   |
| TC0700001355.mm.1 | NM_019393          | Exosc9  | exosome component 9                             | 36552606  | 36566028  | TC0300000269.mm.1 | -0.1 | 0.125491 |
| TC0700001361.mm.1 | NM_007651          | Cd53    | CD53 antigen                                    | 106758861 | 106790149 | TC0300002695.mm.1 | -0.6 | 0.125648 |
| TC0700001368.mm.1 | NM_001166727       | Vmn1r17 | vomerol nasal 1 receptor 175                    | 23808286  | 23809200  | TC0400002585.mm.1 | 0.1  | 0.125908 |
| TC0700001369.mm.1 | ENSMUST00000102024 | Gm24830 | predicted gene, 24830                           | 96328425  | 96328590  | TC0300000936.mm.1 | -0.6 | 0.125986 |
| TC0700001372.mm.1 | ENSMUST00000083360 | Gm26232 | predicted gene, 26232                           | 96450446  | 96450611  | TC0300000942.mm.1 | -0.6 | 0.125986 |
| TC0700001377.mm.1 | NR_004413          | Rnu1b6  | U1b6 small nuclear RNA                          | 96460024  | 96460189  | TC0300002517.mm.1 | -0.6 | 0.125986 |
| TC0700001388.mm.1 | NR_004413          | Rnu1b6  | U1b6 small nuclear RNA                          | 0         | 0         | TSUnmapped0000017 | -0.6 | 0.125986 |
| TC0700001400.mm.1 | NM_023465          | Ctnnbip | catenin beta interacting protein 1              | 149518236 | 149566437 | TC0400001953.mm.1 | 0.1  | 0.126093 |
| TC0700001402.mm.1 | NM_001010930       | Mrps33  | mitochondrial ribosomal protein S33             | 39801804  | 39810988  | TC0600002133.mm.1 | -0.2 | 0.126102 |
| TC0700001404.mm.1 | NM_001033040       | Gm166   | predicted gene 166                              | 127582383 | 127588595 | TC0700004332.mm.1 | 0.1  | 0.126171 |
| TC0700001408.mm.1 | NM_153778          | Atoh8   | atonal homolog 8 (Drosophila)                   | 72206177  | 72235577  | TC0600002480.mm.1 | 0.1  | 0.126255 |

|                   |                    |         |                                                  |           |           |                    |      |          |
|-------------------|--------------------|---------|--------------------------------------------------|-----------|-----------|--------------------|------|----------|
| TC0700001410.mm.1 | NM_177632          | Fam43a  | family with sequence similarity 43, member A     | 30599723  | 30602797  | TC1600000397.mm.1  | 0.1  | 0.126302 |
| TC0700001428.mm.1 | NM_001144988       | Spg20   | spastic paraplegia 20, spartin (Troyer syndrome) | 55112108  | 55137332  | TC0300000416.mm.1  | 0.1  | 0.126528 |
| TC0700001430.mm.1 | NM_183221          | Fat4    | FAT tumor suppressor homolog 4 (Drosophila)      | 38886940  | 39011985  | TC0300000299.mm.1  | 0.1  | 0.126552 |
| TC0700001432.mm.1 | NM_133840          | Clp1    | CLP1, cleavage and polyadenylation factor I sub  | 84722104  | 84727350  | TC0200003876.mm.1  | -0.1 | 0.126581 |
| TC0700001433.mm.1 | ENSMUST00000122504 | Gm24596 | predicted gene, 24596                            | 126563874 | 126563980 | TC0700004283.mm.1  | -0.8 | 0.126586 |
| TC0700001437.mm.1 | NR_046118          | n-R5s10 | nuclear encoded rRNA 5S 100                      | 123538784 | 123538904 | TC0800003104.mm.1  | -0.6 | 0.126676 |
| TC0700001441.mm.1 | NR_046119          | n-R5s10 | nuclear encoded rRNA 5S 103                      | 123543871 | 123543991 | TC0800003107.mm.1  | -0.6 | 0.126676 |
| TC0700001444.mm.1 | NR_046120          | n-R5s10 | nuclear encoded rRNA 5S 104                      | 123545576 | 123545696 | TC0800003108.mm.1  | -0.6 | 0.126676 |
| TC0700001455.mm.1 | NR_046122          | n-R5s10 | nuclear encoded rRNA 5S 105                      | 123547263 | 123547383 | TC0800003109.mm.1  | -0.6 | 0.126676 |
| TC0700001459.mm.1 | ENSMUST00000179704 | n-R5s10 | nuclear encoded rRNA 5S 107                      | 123550667 | 123550785 | TC0800003111.mm.1  | -0.6 | 0.126676 |
| TC0700001475.mm.1 | NR_046123          | n-R5s10 | nuclear encoded rRNA 5S 108                      | 123552362 | 123552482 | TC0800003112.mm.1  | -0.6 | 0.126676 |
| TC0700001493.mm.1 | NR_046124          | n-R5s11 | nuclear encoded rRNA 5S 110                      | 123555761 | 123555881 | TC0800003114.mm.1  | -0.6 | 0.126676 |
| TC0700001499.mm.1 | NR_046125          | n-R5s11 | nuclear encoded rRNA 5S 111                      | 123557488 | 123557608 | TC0800003115.mm.1  | -0.6 | 0.126676 |
| TC0700001520.mm.1 | NR_046126          | n-R5s11 | nuclear encoded rRNA 5S 113                      | 123560886 | 123561006 | TC0800003117.mm.1  | -0.6 | 0.126676 |
| TC0700001522.mm.1 | NR_046127          | Rn5s10  | 5S RNA 10                                        | 123565967 | 123566087 | TC0800003120.mm.1  | -0.6 | 0.126676 |
| TC0700001526.mm.1 | NR_046128          | n-R5s11 | nuclear encoded rRNA 5S 117                      | 123567635 | 123567755 | TC0800003121.mm.1  | -0.6 | 0.126676 |
| TC0700001528.mm.1 | NR_046129          | n-R5s12 | nuclear encoded rRNA 5S 121                      | 123574395 | 123574515 | TC0800003125.mm.1  | -0.6 | 0.126676 |
| TC0700001532.mm.1 | NR_046130          | n-R5s12 | nuclear encoded rRNA 5S 122                      | 123576074 | 123576194 | TC0800003126.mm.1  | -0.6 | 0.126676 |
| TC0700001534.mm.1 | NR_046132          | n-R5s12 | nuclear encoded rRNA 5S 123                      | 123577753 | 123577873 | TC0800003127.mm.1  | -0.6 | 0.126676 |
| TC0700001548.mm.1 | NR_046133          | n-R5s12 | nuclear encoded rRNA 5S 124                      | 123579448 | 123579568 | TC0800003128.mm.1  | -0.6 | 0.126676 |
| TC0700001554.mm.1 | NR_046134          | n-R5s12 | nuclear encoded rRNA 5S 128                      | 123586240 | 123586360 | TC0800003132.mm.1  | -0.6 | 0.126676 |
| TC0700001561.mm.1 | NR_046140          | Rn5s17  | 5S RNA 17                                        | 123593069 | 123593189 | TC0800003136.mm.1  | -0.6 | 0.126676 |
| TC0700001563.mm.1 | NR_046141          | n-R5s13 | nuclear encoded rRNA 5S 133                      | 123594752 | 123594872 | TC0800003137.mm.1  | -0.6 | 0.126676 |
| TC0700001580.mm.1 | NR_046143          | n-R5s13 | nuclear encoded rRNA 5S 134                      | 123596455 | 123596575 | TC0800003138.mm.1  | -0.6 | 0.126676 |
| TC0700001581.mm.1 | NR_030686          | Rn5s    | 5S RNA                                           | 123598156 | 123598276 | TC0800003139.mm.1  | -0.6 | 0.126676 |
| TC0700001584.mm.1 | NR_046145          | n-R5s13 | nuclear encoded rRNA 5S 138                      | 123603245 | 123603365 | TC0800003142.mm.1  | -0.6 | 0.126676 |
| TC0700001585.mm.1 | NR_046146          | n-R5s13 | nuclear encoded rRNA 5S 139                      | 123604946 | 123605066 | TC0800003143.mm.1  | -0.6 | 0.126676 |
| TC0700001596.mm.1 | NR_046147          | Rn5s23  | 5S RNA 23                                        | 123606611 | 123606731 | TC0800003144.mm.1  | -0.6 | 0.126676 |
| TC0700001604.mm.1 | NR_046148          | n-R5s14 | nuclear encoded rRNA 5S 141                      | 123608318 | 123608438 | TC0800003145.mm.1  | -0.6 | 0.126676 |
| TC0700001613.mm.1 | NR_046149          | n-R5s14 | nuclear encoded rRNA 5S 142                      | 123610015 | 123610135 | TC0800003146.mm.1  | -0.6 | 0.126676 |
| TC0700001618.mm.1 | NR_046150          | n-R5s14 | nuclear encoded rRNA 5S 143                      | 123611713 | 123611833 | TC0800003147.mm.1  | -0.6 | 0.126676 |
| TC0700001619.mm.1 | NR_046151          | n-R5s14 | nuclear encoded rRNA 5S 144                      | 123613412 | 123613532 | TC0800003148.mm.1  | -0.6 | 0.126676 |
| TC0700001621.mm.1 | NR_046152          | Rn5s28  | 5S RNA 28                                        | 123615097 | 123615217 | TC0800003149.mm.1  | -0.6 | 0.126676 |
| TC0700001623.mm.1 | NR_046153          | n-R5s14 | nuclear encoded rRNA 5S 146                      | 123616808 | 123616928 | TC0800003150.mm.1  | -0.6 | 0.126676 |
| TC0700001630.mm.1 | NR_046154          | Rn5s30  | 5S RNA 30                                        | 123618534 | 123618654 | TC0800003151.mm.1  | -0.6 | 0.126676 |
| TC0700001631.mm.1 | NR_046155          | Rn5s31  | 5S RNA 31                                        | 123620239 | 123620359 | TC0800003152.mm.1  | -0.6 | 0.126676 |
| TC0700001640.mm.1 | NR_046156          | n-R5s14 | nuclear encoded rRNA 5S 149                      | 123621926 | 123622046 | TC0800003153.mm.1  | -0.6 | 0.126676 |
| TC0700001659.mm.1 | ENSMUST00000121639 | Gm13508 | predicted gene 13508                             | 49327377  | 49328151  | TC0200003496.mm.1  | -0.2 | 0.126786 |
| TC0700001660.mm.1 | ENSMUST00000183442 | mmu-mir | mmu-mir-7669                                     | 90011153  | 90011210  | TC0300002363.mm.1  | -0.1 | 0.126902 |
| TC0700001666.mm.1 | NM_001033362       | Gm614   | predicted gene 614                               | 101261376 | 101263992 | TC0X00003436.mm.1  | -0.2 | 0.127074 |
| TC0700001677.mm.1 | XR_104698          | Gm10912 | predicted gene 10912                             | 104065797 | 104067486 | TC0200001550.mm.1  | 0.2  | 0.127494 |
| TC0700001681.mm.1 | ENSMUST00000157970 | Gm24601 | predicted gene, 24601                            | 94826781  | 94826923  | TC0600002776.mm.1  | 0.2  | 0.127541 |
| TC0700001689.mm.1 | NM_001252081       | Zswim8  | zinc finger SWIM-type containing 8               | 20707552  | 20723619  | TC1400000174.mm.1  | 0.1  | 0.12755  |
| TC0700001691.mm.1 | NM_172288          | Nup133  | nucleoporin 133                                  | 123897123 | 123949265 | TC0800003162.mm.1  | -0.2 | 0.127624 |
| TC0700001692.mm.1 | NR_034044          | Snora36 | small nucleolar RNA, H/ACA box 36B               | 185242907 | 185243043 | TC0100001781.mm.1  | 0.6  | 0.127628 |
| TC0700001694.mm.1 | NM_015818          | Hs6st1  | heparan sulfate 6-O-sulfotransferase 1           | 361064400 | 361064446 | TC0100000237.mm.1  | -0.3 | 0.127652 |
| TC0700001705.mm.1 | NM_180588          | Reep4   | receptor accessory protein 4                     | 70545251  | 70548935  | TC1400001000.mm.1  | -0.3 | 0.127727 |
| TC0700001709.mm.1 | ENSMUST00000088080 | Gm10217 | predicted gene 10217                             | 9864251   | 9870315   | TC0800000072.mm.1  | 0.5  | 0.127743 |
| TC0700001711.mm.1 | NM_183183          | Gprin3  | GPRIN family member 3                            | 59352461  | 59426290  | TC0600002385.mm.1  | 0.2  | 0.12782  |
| TC0700001714.mm.1 | NM_001033540       | Gm5113  | predicted gene 5113                              | 30169875  | 30180209  | TC0700000551.mm.1  | 0.1  | 0.127861 |
| TC0700001716.mm.1 | ENSMUST00000175238 | Gm25069 | predicted gene, 25069                            | 78302661  | 78302746  | TC1700001180.mm.1  | 0.3  | 0.127945 |
| TC0700001746.mm.1 | NCBI_Gene:382695:p | Ighv1-5 | immunoglobulin heavy variable 1-56               | 115242802 | 115243095 | TC1200002633.mm.1  | -1.0 | 0.128028 |
| TC0700001747.mm.1 | NCBI_Gene:243423:p | Igkv1-1 | immunoglobulin kappa variable 1-132              | 67759700  | 67760413  | TC0600003507.mm.1  | -0.6 | 0.128057 |
| TC0700001749.mm.1 | ENSMUST00000175541 | Gm22566 | predicted gene, 22566                            | 25054140  | 25054224  | TC1000000220.mm.1  | -1.7 | 0.128129 |
| TC0700001754.mm.1 | ENSMUST00000121737 | Gm12815 | predicted gene 12815                             | 112146098 | 112146232 | TC0400003289.mm.1  | -0.2 | 0.128135 |
| TC0700001755.mm.1 | NM_153802          | Zfp128  | zinc finger protein 128                          | 12881177  | 12893422  | TC0700000149.mm.1  | -0.1 | 0.128191 |
| TC0700001759.mm.1 | ENSMUST00000117001 | Gm24483 | predicted gene, 24483                            | 22395371  | 22395458  | TC1800000172.mm.1  | 0.5  | 0.128287 |
| TC0700001764.mm.1 | NM_023162          | Znrd1   | zinc ribbon domain containing, 1                 | 36954356  | 36958559  | TC1700002042.mm.1  | -0.1 | 0.128338 |
| TC0700001767.mm.1 | NM_021429          | Hslb1p3 | HCLS1 binding protein 3                          | 8313433   | 8343824   | TC1200000061.mm.1  | 0.1  | 0.128355 |
| TC0700001773.mm.1 | NM_001163430       | Sirt6   | sirtuin 6 (silent mating type information regul  | 81621785  | 81627797  | TC1000002551.mm.1  | -0.1 | 0.128398 |
| TC0700001777.mm.1 | ENSMUST00000083912 | Gm25937 | predicted gene, 25937                            | 95867334  | 95867440  | TC0500000921.mm.1  | -0.4 | 0.128401 |
| TC0700001781.mm.1 | ENSMUST00000119412 | Gm6500  | predicted gene 6500                              | 117886441 | 117886891 | TC0X00002899.mm.1  | -0.1 | 0.128409 |
| TC0700001793.mm.1 | ENSMUST00000122531 | n-R5s15 | nuclear encoded rRNA 5S 155                      | 90293734  | 90293846  | TC0700001279.mm.1  | 0.3  | 0.128444 |
| TC0700001794.mm.1 | ENSMUST00000117332 | Gm13731 | predicted gene 13731                             | 87333802  | 87333997  | TC0200001286.mm.1  | -0.1 | 0.128538 |
| TC0700001804.mm.1 | NM_011382          | Six4    | sine oculis-related homeobox 4                   | 73099609  | 73114037  | TC1200001913.mm.1  | -0.1 | 0.128581 |
| TC0700001814.mm.1 | ENSMUST00000180065 | Gm25448 | predicted gene, 25448                            | 62791507  | 62791613  | TC1300000762.mm.1  | -0.8 | 0.128609 |
| TC0700001823.mm.1 | ENSMUST00000178850 | Gm24713 | predicted gene, 24713                            | 18009263  | 18009369  | TC1500001252.mm.1  | -0.8 | 0.128609 |
| TC0700001832.mm.1 | NM_025359          | Tspan13 | tetraspanin 13                                   | 36014555  | 36042500  | TC1200001643.mm.1  | -0.3 | 0.128618 |
| TC0700001833.mm.1 | ENSMUST00000120182 | Gm15794 | predicted gene 15794                             | 66197906  | 66198423  | TC0500002507.mm.1  | -0.1 | 0.128733 |
| TC0700001838.mm.1 | NR_039585          | Mir5124 | microRNA 5124                                    | 40865791  | 40865862  | TC1300000461.mm.1  | 0.1  | 0.128787 |
| TC0700001841.mm.1 | ENSMUST00000104810 | Gm22008 | predicted gene, 22008                            | 117999336 | 117999430 | TC0900001554.mm.1  | 0.3  | 0.128855 |
| TC0700001844.mm.1 | ENSMUST00000174983 | Gm25677 | predicted gene, 25677                            | 9669279   | 9669350   | TC0400000067.mm.1  | -0.2 | 0.128909 |
| TC0700001845.mm.1 | NR_030579          | Mir92b  | microRNA 92b                                     | 89227116  | 89227198  | TC03000002341.mm.1 | 0.1  | 0.128931 |
| TC0700001847.mm.1 | NM_172403          | 2810021 | RIKEN cDNA 2810021J22 gene                       | 58867216  | 58884338  | TC1100000708.mm.1  | -0.1 | 0.128975 |
| TC0700001851.mm.1 | ENSMUST00000083940 | Gm25683 | predicted gene, 25683                            | 118153480 | 118153610 | TC0100001692.mm.1  | -0.3 | 0.129005 |
| TC0700001853.mm.1 | ENSMUST00000082558 | Gm22060 | predicted gene, 22060                            | 32446822  | 32446928  | TC0900001988.mm.1  | -0.9 | 0.129032 |
| TC0700001855.mm.1 | ENSMUST00000057611 | Gm7367  | predicted pseudogene 7367                        | 60155538  | 60156170  | TC0700000954.mm.1  | -0.1 | 0.12928  |
| TC0700001860.mm.1 | NM_033612          | Cela1   | chymotrypsin-like elastase family, member 1      | 100674421 | 100687920 | TC1500002249.mm.1  | 0.1  | 0.129304 |

|                   |                    |         |                                                 |           |           |                   |      |          |
|-------------------|--------------------|---------|-------------------------------------------------|-----------|-----------|-------------------|------|----------|
| TC0700001861.mm.1 | ENSMUST00000178061 | Gm23151 | predicted gene, 23151                           | 126389548 | 126389654 | TC0500003277.mm.1 | -0.7 | 0.129414 |
| TC0700001862.mm.1 | NM_153566          | Yrdc    | yrnC domain containing (E.coli)                 | 124850679 | 124855242 | TC0400001430.mm.1 | -0.1 | 0.129509 |
| TC0700001870.mm.1 | NM_001161816       | Gm15455 | predicted gene 15455                            | 33835899  | 33838914  | TC0100002142.mm.1 | -0.1 | 0.129615 |
| TC0700001872.mm.1 | NM_001077411       | Gba     | glucosidase, beta, acid                         | 89202928  | 89208681  | TC0300000750.mm.1 | 0.3  | 0.129657 |
| TC0700001875.mm.1 | ENSMUST00000083917 | Gm22352 | predicted gene, 22352                           | 125105009 | 125105115 | TC0200001876.mm.1 | -0.7 | 0.129812 |
| TC0700001876.mm.1 | ENSMUST00000157972 | Gm24584 | predicted gene, 24584                           | 83702252  | 83702358  | TC0300000646.mm.1 | -0.7 | 0.129812 |
| TC0700001877.mm.1 | NM_033268          | Actn2   | actinin alpha 2                                 | 12269426  | 12340760  | TC1300001447.mm.1 | -0.1 | 0.129823 |
| TC0700001878.mm.1 | ENSMUST00000082989 | Gm22042 | predicted gene, 22042                           | 51812483  | 51812647  | TC0400002653.mm.1 | -0.6 | 0.129876 |
| TC0700001886.mm.1 | NM_001034862       | Erich1  | glutamate rich 1                                | 14027565  | 14090327  | TC0800001752.mm.1 | -0.1 | 0.129968 |
| TC0700001888.mm.1 | ENSMUST00000083084 | Gm23511 | predicted gene, 23511                           | 48954722  | 48954885  | TC0300000343.mm.1 | -0.6 | 0.129997 |
| TC0700001892.mm.1 | ENSMUST00000178878 | Gm5117  | predicted gene 5117                             | 31737054  | 31739763  | TC0800001982.mm.1 | -0.1 | 0.130019 |
| TC0700001893.mm.1 | NR_028549          | Snord37 | small nucleolar RNA, C/D box 37                 | 81178950  | 81179013  | TC1000000885.mm.1 | -0.3 | 0.130154 |
| TC0700001894.mm.1 | NM_025859          | Arl1    | ADP-ribosylation factor-like 1                  | 88730858  | 88744094  | TC0400001084.mm.1 | 0.2  | 0.130171 |
| TC0700001902.mm.1 | ENSMUST00000083002 | Gm23722 | predicted gene, 23722                           | 39573746  | 39573875  | TC0100002239.mm.1 | -0.1 | 0.130186 |
| TC0700001926.mm.1 | ENSMUST00000072359 | Tpm3-rs | tropomyosin 3, related sequence 7               | 113314608 | 113316713 | TC1400001242.mm.1 | -0.4 | 0.130501 |
| TC0700001927.mm.1 | NM_033218          | Sreb2   | sterol regulatory element binding factor 2      | 82147266  | 82205376  | TC1500000742.mm.1 | -0.3 | 0.130551 |
| TC0700001951.mm.1 | ENSMUST00000104326 | Gm25877 | predicted gene, 25877                           | 103586272 | 103586400 | TC0400003179.mm.1 | -0.3 | 0.13056  |
| TC0700001961.mm.1 | NM_145509          | 5430435 | RIKEN cDNA 5430435G22 gene                      | 131688695 | 131715439 | TC0100001173.mm.1 | 0.2  | 0.13062  |
| TC0700001974.mm.1 | ENSMUST00000104232 | Gm24282 | predicted gene, 24282                           | 51297179  | 51297244  | TC0300000357.mm.1 | 0.2  | 0.130726 |
| TC0700001980.mm.1 | ENSMUST00000083868 | Gm23041 | predicted gene, 23041                           | 109368088 | 109368193 | TC1000002845.mm.1 | -0.5 | 0.130799 |
| TC0700001985.mm.1 | ENSMUST00000105564 | Gm10944 | predicted gene 10944                            | 10681348  | 10681858  | TC1000000077.mm.1 | -0.3 | 0.130826 |
| TC0700001994.mm.1 | NM_178798          | Slc7a6  | solute carrier family 7 (cationic amino acid tr | 106168875 | 106198704 | TC0800001245.mm.1 | -0.1 | 0.130873 |
| TC0700002000.mm.1 | ENSMUST00000179699 | Gm26229 | predicted gene, 26229                           | 10487704  | 10487824  | TC0200000136.mm.1 | -0.2 | 0.130921 |
| TC0700002002.mm.1 | ENSMUST00000177681 | Gm25158 | predicted gene, 25158                           | 10495079  | 10495199  | TC0200000154.mm.1 | -0.2 | 0.130921 |
| TC0700002009.mm.1 | ENSMUST00000160298 | Gm8113  | predicted gene 8113                             | 43925390  | 43933411  | TC1400000453.mm.1 | -0.2 | 0.131008 |
| TC0700002011.mm.1 | NM_001081054       | Qrs1    | glutaminyln-tRNA synthase (glutamine-hydrolyzin | 43874188  | 43901745  | TC1000002092.mm.1 | -0.1 | 0.131096 |
| TC0700002015.mm.1 | NR_046156          | Rn5s14  | nuclear encoded rRNA 5S 149                     | 0         | 0         | TSUnmapped0000013 | -0.6 | 0.131241 |
| TC0700002023.mm.1 | NR_046155          | Rn5s31  | 5S RNA 31                                       | 0         | 0         | TSUnmapped0000014 | -0.6 | 0.131241 |
| TC0700002029.mm.1 | NR_046154          | Rn5s30  | 5S RNA 30                                       | 0         | 0         | TSUnmapped0000014 | -0.6 | 0.131241 |
| TC0700002034.mm.1 | NR_046153          | n-R5s14 | nuclear encoded rRNA 5S 146                     | 0         | 0         | TSUnmapped0000014 | -0.6 | 0.131241 |
| TC0700002036.mm.1 | NR_046152          | Rn5s28  | 5S RNA 28                                       | 0         | 0         | TSUnmapped0000014 | -0.6 | 0.131241 |
| TC0700002045.mm.1 | NR_046151          | n-R5s14 | nuclear encoded rRNA 5S 144                     | 0         | 0         | TSUnmapped0000014 | -0.6 | 0.131241 |
| TC0700002050.mm.1 | NR_046150          | n-R5s14 | nuclear encoded rRNA 5S 143                     | 0         | 0         | TSUnmapped0000014 | -0.6 | 0.131241 |
| TC0700002053.mm.1 | NR_046149          | n-R5s14 | nuclear encoded rRNA 5S 142                     | 0         | 0         | TSUnmapped0000014 | -0.6 | 0.131241 |
| TC0700002055.mm.1 | NR_046148          | n-R5s14 | nuclear encoded rRNA 5S 141                     | 0         | 0         | TSUnmapped0000014 | -0.6 | 0.131241 |
| TC0700002068.mm.1 | NR_046147          | Rn5s23  | 5S RNA 23                                       | 0         | 0         | TSUnmapped0000014 | -0.6 | 0.131241 |
| TC0700002069.mm.1 | NR_046146          | n-R5s13 | nuclear encoded rRNA 5S 139                     | 0         | 0         | TSUnmapped0000014 | -0.6 | 0.131241 |
| TC0700002070.mm.1 | NR_046145          | n-R5s13 | nuclear encoded rRNA 5S 138                     | 0         | 0         | TSUnmapped0000015 | -0.6 | 0.131241 |
| TC0700002073.mm.1 | NR_046143          | n-R5s13 | nuclear encoded rRNA 5S 134                     | 0         | 0         | TSUnmapped0000015 | -0.6 | 0.131241 |
| TC0700002074.mm.1 | NR_046141          | n-R5s13 | nuclear encoded rRNA 5S 133                     | 0         | 0         | TSUnmapped0000015 | -0.6 | 0.131241 |
| TC0700002115.mm.1 | NR_046140          | Rn5s17  | 5S RNA 17                                       | 0         | 0         | TSUnmapped0000015 | -0.6 | 0.131241 |
| TC0700002128.mm.1 | NR_046134          | n-R5s12 | nuclear encoded rRNA 5S 128                     | 0         | 0         | TSUnmapped0000015 | -0.6 | 0.131241 |
| TC0700002132.mm.1 | NR_046133          | n-R5s12 | nuclear encoded rRNA 5S 124                     | 0         | 0         | TSUnmapped0000015 | -0.6 | 0.131241 |
| TC0700002138.mm.1 | NR_046132          | n-R5s12 | nuclear encoded rRNA 5S 123                     | 0         | 0         | TSUnmapped0000015 | -0.6 | 0.131241 |
| TC0700002139.mm.1 | NR_046130          | n-R5s12 | nuclear encoded rRNA 5S 122                     | 0         | 0         | TSUnmapped0000015 | -0.6 | 0.131241 |
| TC0700002140.mm.1 | NR_046129          | n-R5s12 | nuclear encoded rRNA 5S 121                     | 0         | 0         | TSUnmapped0000015 | -0.6 | 0.131241 |
| TC0700002150.mm.1 | NR_046128          | n-R5s11 | nuclear encoded rRNA 5S 117                     | 0         | 0         | TSUnmapped0000015 | -0.6 | 0.131241 |
| TC0700002154.mm.1 | NR_046127          | Rn5s10  | 5S RNA 10                                       | 0         | 0         | TSUnmapped0000016 | -0.6 | 0.131241 |
| TC0700002155.mm.1 | NR_046126          | n-R5s11 | nuclear encoded rRNA 5S 113                     | 0         | 0         | TSUnmapped0000016 | -0.6 | 0.131241 |
| TC0700002162.mm.1 | NR_046125          | n-R5s11 | nuclear encoded rRNA 5S 111                     | 0         | 0         | TSUnmapped0000016 | -0.6 | 0.131241 |
| TC0700002164.mm.1 | NR_046124          | n-R5s11 | nuclear encoded rRNA 5S 110                     | 0         | 0         | TSUnmapped0000016 | -0.6 | 0.131241 |
| TC0700002166.mm.1 | NR_046123          | n-R5s10 | nuclear encoded rRNA 5S 108                     | 0         | 0         | TSUnmapped0000016 | -0.6 | 0.131241 |
| TC0700002167.mm.1 | NR_046122          | n-R5s10 | nuclear encoded rRNA 5S 105                     | 0         | 0         | TSUnmapped0000016 | -0.6 | 0.131241 |
| TC0700002173.mm.1 | NR_046120          | n-R5s10 | nuclear encoded rRNA 5S 104                     | 0         | 0         | TSUnmapped0000016 | -0.6 | 0.131241 |
| TC0700002181.mm.1 | NR_046119          | n-R5s10 | nuclear encoded rRNA 5S 103                     | 0         | 0         | TSUnmapped0000016 | -0.6 | 0.131241 |
| TC0700002186.mm.1 | NR_046118          | n-R5s10 | nuclear encoded rRNA 5S 100                     | 0         | 0         | TSUnmapped0000016 | -0.6 | 0.131241 |
| TC0700002187.mm.1 | NR_030686          | Rn5s    | 5S RNA                                          | 0         | 0         | TSUnmapped0000017 | -0.6 | 0.131241 |
| TC0700002190.mm.1 | NM_153564          | Gbp5    | guanylate binding protein 5                     | 142496900 | 142619179 | TC0300001444.mm.1 | 0.1  | 0.131249 |
| TC0700002221.mm.1 | ENSMUST00000179589 | Gm24761 | predicted gene, 24761                           | 10482612  | 10482738  | TC0200000123.mm.1 | -0.2 | 0.131298 |
| TC0700002223.mm.1 | ENSMUST00000116759 | Mir467h | microRNA 467h                                   | 115381819 | 115381939 | TC0900001532.mm.1 | 0.3  | 0.131326 |
| TC0700002230.mm.1 | NM_007415          | Parp1   | poly (ADP-ribose) polymerase family, member 1   | 180568955 | 180601254 | TC0100001711.mm.1 | -0.3 | 0.131542 |
| TC0700002232.mm.1 | ENSMUST00000122543 | n-R5s15 | nuclear encoded rRNA 5S 157                     | 116625122 | 116625242 | TC0700004160.mm.1 | 0.2  | 0.131577 |
| TC0700002238.mm.1 | ENSMUST00000083818 | Gm23344 | predicted gene, 23344                           | 64175048  | 64175115  | TC0900000811.mm.1 | -0.8 | 0.131579 |
| TC0700002248.mm.1 | NM_009034          | Rbp2    | retinol binding protein 2, cellular             | 98490537  | 98509771  | TC0900001234.mm.1 | 0.1  | 0.131681 |
| TC0700002268.mm.1 | ENSMUST00000104630 | Gm23051 | predicted gene, 23051                           | 24193472  | 24193564  | TC0800001888.mm.1 | 0.4  | 0.131683 |
| TC0700002270.mm.1 | BC055438           | Atp6v1e | ATPase, H+ transporting, lysosomal V1 subunit E | 120795244 | 120822685 | TC0600003045.mm.1 | 0.4  | 0.131724 |
| TC0700002282.mm.1 | ENSMUST00000083971 | Gm26110 | predicted gene, 26110                           | 171027965 | 171028129 | TC0100001575.mm.1 | -0.6 | 0.131895 |
| TC0700002283.mm.1 | NM_001164600       | Puf60   | poly-U binding splicing factor 60               | 76070182  | 76080946  | TC1500001762.mm.1 | -0.2 | 0.132052 |
| TC0700002290.mm.1 | NM_133831          | Gltscr2 | glioma tumor suppressor candidate region gene   | 15937835  | 15946108  | TC0700002415.mm.1 | -0.2 | 0.132087 |
| TC0700002292.mm.1 | ENSMUST00000183717 | DAOA-AS | DAOA antisense RNA 1 conserved region 1         | 7521636   | 7521834   | TC0800000051.mm.1 | 0.2  | 0.132147 |
| TC0700002316.mm.1 | NM_029956          | Mmab    | methylmalonic aciduria (cobalamin deficiency) t | 114431034 | 114444059 | TC0500003061.mm.1 | 0.1  | 0.132254 |
| TC0700002321.mm.1 | NCBI_Gene:10010194 | Trdv2-1 | T cell receptor delta variable 2-1              | 53946073  | 53946660  | TC1400000713.mm.1 | -0.2 | 0.132298 |
| TC0700002324.mm.1 | NM_029083          | Ddit4   | DNA-damage-inducible transcript 4               | 59949675  | 59951770  | TC1000002224.mm.1 | -0.2 | 0.132468 |
| TC0700002326.mm.1 | NM_011777          | Zyx     | zyxin                                           | 42349828  | 42360213  | TC0600000459.mm.1 | 0.1  | 0.132553 |
| TC0700002332.mm.1 | ENSMUST00000101946 | Gm24701 | predicted gene, 24701                           | 14912358  | 14912462  | TC0700000185.mm.1 | 0.3  | 0.132589 |
| TC0700002334.mm.1 | ENSMUST00000167847 | Gm21655 | predicted gene, 21655                           | 25923498  | 25926215  | TC0500002114.mm.1 | -0.2 | 0.132603 |
| TC0700002337.mm.1 | ENSMUST00000158582 | Gm26213 | predicted gene, 26213                           | 13969348  | 13969457  | TC1600001239.mm.1 | 0.2  | 0.132918 |
| TC0700002359.mm.1 | NR_002903          | Snord61 | small nucleolar RNA, C/D box 61                 | 57391448  | 57391519  | TC0X00002273.mm.1 | -0.9 | 0.132952 |

|                   |                    |         |                                                             |           |           |                   |      |          |
|-------------------|--------------------|---------|-------------------------------------------------------------|-----------|-----------|-------------------|------|----------|
| TC0700002368.mm.1 | ENSMUST00000157682 | Gm24505 | predicted gene, 24505                                       | 35217235  | 35217360  | TC0700000656.mm.1 | 0.3  | 0.132967 |
| TC0700002385.mm.1 | ENSMUST00000118553 | Gm8534  | predicted gene 8534                                         | 153656606 | 153657371 | TC0X00001563.mm.1 | -0.2 | 0.132988 |
| TC0700002386.mm.1 | ENSMUST00000104567 | Gm23531 | predicted gene, 23531                                       | 42522136  | 42522203  | TC0800002127.mm.1 | -0.2 | 0.133093 |
| TC0700002390.mm.1 | ENSMUST00000121409 | Osbpl5  | oxysterol binding protein-like 5                            | 143688762 | 143756985 | TC0700004595.mm.1 | 0.1  | 0.133097 |
| TC0700002392.mm.1 | NM_010799          | Minpp1  | multiple inositol polyphosphate histidine phosphatase       | 32485769  | 32515370  | TC1900000465.mm.1 | -0.2 | 0.133106 |
| TC0700002393.mm.1 | NM_009596          | Scgb1b2 | secretoglobulin, family 1B, member 27                       | 34021483  | 34022881  | TC0700000628.mm.1 | -0.2 | 0.133158 |
| TC0700002394.mm.1 | NM_133185          | Rogdi   | rogdi homolog (Drosophila)                                  | 5008729   | 5013553   | TC1600001150.mm.1 | 0.1  | 0.133187 |
| TC0700002396.mm.1 | NM_133228          | Zfp87   | zinc finger protein 87                                      | 67515781  | 67526231  | TC1300002776.mm.1 | -0.2 | 0.133412 |
| TC0700002397.mm.1 | ENSMUST00000083269 | Gm24614 | predicted gene, 24614                                       | 8429158   | 8429264   | TC0300000041.mm.1 | -0.8 | 0.133543 |
| TC0700002399.mm.1 | ENSMUST00000179660 | Gm16416 | predicted gene 16416                                        | 103397109 | 103397591 | TC1300001161.mm.1 | -0.6 | 0.133612 |
| TC0700002400.mm.1 | NCBI_Gene:238447:p | Igha    | Igha immunoglobulin heavy constant alpha                    | 113254899 | 113429833 | TC1200002537.mm.1 | -0.4 | 0.133619 |
| TC0700002401.mm.1 | ENSMUST00000116848 | Gm26302 | predicted gene, 26302                                       | 26229983  | 26230064  | TC0X00000250.mm.1 | 0.5  | 0.133629 |
| TC0700002404.mm.1 | ENSMUST00000104817 | Gm23489 | predicted gene, 23489                                       | 30353443  | 30353527  | TC0200003270.mm.1 | 0.5  | 0.133721 |
| TC0700002405.mm.1 | ENSMUST00000175536 | Gm26236 | predicted gene, 26236                                       | 32675109  | 32675245  | TC0200000590.mm.1 | -0.5 | 0.133788 |
| TC0700002406.mm.1 | NM_001164742       | Serpina | serine (or cysteine) peptidase inhibitor, clade 1, member 1 | 103688044 | 103695529 | TC1200002274.mm.1 | 0.4  | 0.13379  |
| TC0700002409.mm.1 | NM_025789          | Rsph3a  | radial spoke 3A homolog (Chlamydomonas)                     | 7945614   | 7979824   | TC1700000078.mm.1 | 0.2  | 0.133909 |
| TC0700002410.mm.1 | ENSMUST00000175473 | Gm52248 | predicted gene, 52248                                       | 42281716  | 42281813  | TC1200000383.mm.1 | 0.3  | 0.134161 |
| TC0700002414.mm.1 | XM_003084522       | LOC1005 | zinc finger protein 64-like                                 | 168893331 | 168955587 | TC0200005225.mm.1 | -0.1 | 0.134252 |
| TC0700002415.mm.1 | XM_893519          | Gm6910  | predicted gene 6910                                         | 66007615  | 66009240  | TC1300000802.mm.1 | -0.1 | 0.134306 |
| TC0700002416.mm.1 | NCBI_Gene:434041:p | Igkv8-2 | immunoglobulin kappa chain variable 8-27                    | 70171809  | 70172270  | TC0600003588.mm.1 | -0.4 | 0.134306 |
| TC0700002417.mm.1 | NM_030084          | Gpr108  | G protein-coupled receptor 108                              | 57234914  | 57247641  | TC1700002354.mm.1 | 0.2  | 0.13433  |
| TC0700002421.mm.1 | NM_001145900       | Btdb6   | BTB (POZ) domain containing 6                               | 112976482 | 112978940 | TC1200001275.mm.1 | -0.1 | 0.134432 |
| TC0700002422.mm.1 | ENSMUST00000083425 | Gm23136 | predicted gene, 23136                                       | 64176661  | 64176759  | TC0900000814.mm.1 | -1.1 | 0.134491 |
| TC0700002433.mm.1 | NR_029412          | Snora16 | small nucleolar RNA, H/ACA box 16A                          | 132309465 | 132309600 | TC0400001583.mm.1 | -0.9 | 0.134518 |
| TC0700002435.mm.1 | ENSMUST00000104161 | Gm24867 | predicted gene, 24867                                       | 13675376  | 13675482  | TC1700000158.mm.1 | 0.2  | 0.134572 |
| TC0700002437.mm.1 | NR_034051          | Snora34 | small nucleolar RNA, H/ACA box 34                           | 98519716  | 98519878  | TC1500002177.mm.1 | -1.0 | 0.134657 |
| TC0700002442.mm.1 | NM_207220          | Gpr137  | G protein-coupled receptor 137                              | 6938069   | 6942450   | TC1900001023.mm.1 | 0.1  | 0.134661 |
| TC0700002448.mm.1 | XR_105147          | 9130208 | RIKEN cDNA 9130208D14 gene                                  | 105823257 | 105831515 | TC0700003993.mm.1 | 0.1  | 0.134697 |
| TC0700002451.mm.1 | NM_024450          | Scd3    | stearyl-coenzyme A desaturase 3                             | 44203288  | 44244016  | TC1900000645.mm.1 | 0.1  | 0.134795 |
| TC0700002459.mm.1 | NM_019420          | B3galt4 | UDP-Gal:betaGlcNAc beta 1,3-galactosyltransferase 4         | 33949909  | 33951488  | TC1700001887.mm.1 | -0.1 | 0.134828 |
| TC0700002462.mm.1 | ENSMUST00000082805 | Gm23055 | predicted gene, 23055                                       | 132442034 | 132442127 | TC0400001587.mm.1 | -0.2 | 0.134852 |
| TC0700002468.mm.1 | ENSMUST00000121098 | Gm12642 | predicted gene 12642                                        | 93265413  | 93266288  | TC0400003055.mm.1 | -0.1 | 0.134877 |
| TC0700002471.mm.1 | ENSMUST00000117993 | Gm13641 | predicted gene 13641                                        | 71319783  | 71320255  | TC0200001034.mm.1 | -0.6 | 0.134917 |
| TC0700002481.mm.1 | NM_144845          | Ugt3a2  | UDP glycosyltransferases 3 family, polypeptide 2            | 9335550   | 9370955   | TC1500000073.mm.1 | 0.7  | 0.134941 |
| TC0700002483.mm.1 | NM_009977          | Cst7    | cystatin F (leukocystatin)                                  | 150570415 | 150578944 | TC0200002223.mm.1 | -0.1 | 0.135003 |
| TC0700002486.mm.1 | ENSMUST00000104660 | Gm25062 | predicted gene, 25062                                       | 37580335  | 37580427  | TC0600000360.mm.1 | 0.4  | 0.135057 |
| TC0700002487.mm.1 | NM_008057          | Fzd7    | frizzled homolog 7 (Drosophila)                             | 59482147  | 59486959  | TC0100000450.mm.1 | 0.1  | 0.135086 |
| TC0700002489.mm.1 | ENSMUST00000174990 | Gm24026 | predicted gene, 24026                                       | 30967197  | 30967294  | TC1700000527.mm.1 | 0.4  | 0.135155 |
| TC0700002491.mm.1 | ENSMUST00000118146 | Gm11511 | predicted gene 11511                                        | 90516777  | 90517316  | TC1100003534.mm.1 | 0.1  | 0.135224 |
| TC0700002492.mm.1 | NM_008494          | Lfng    | LFNG O-fucosylpeptide 3-beta-N-acetylglucosaminase          | 140607320 | 140615545 | TC0500001695.mm.1 | 0.1  | 0.135242 |
| TC0700002496.mm.1 | NM_001290012       | Pemt    | phosphatidylethanolamine N-methyltransferase                | 0         | 0         | TSUnmapped0000003 | 0.2  | 0.135283 |
| TC0700002497.mm.1 | NM_028874          | Snx19   | sorting nexin 19                                            | 30427329  | 30466726  | TC0900000271.mm.1 | 0.1  | 0.13549  |
| TC0700002499.mm.1 | NM_025517          | Rtca    | RNA 3-terminal phosphate cyclase                            | 116488963 | 116508208 | TC0300002807.mm.1 | -0.1 | 0.13552  |
| TC0700002510.mm.1 | NCBI_Gene:629866:p | Ighv1-1 | Ighv1-16 immunoglobulin heavy variable 1-16                 | 114665872 | 114666165 | TC1200002479.mm.1 | -0.2 | 0.135527 |
| TC0700002530.mm.1 | ENSMUST00000104748 | Mir466h | microRNA 466h                                               | 10514891  | 10514971  | TC0200000199.mm.1 | 0.4  | 0.135557 |
| TC0700002531.mm.1 | ENSMUST00000175436 | Gm23869 | predicted gene, 23869                                       | 121230260 | 121230330 | TC0300001228.mm.1 | 0.3  | 0.135665 |
| TC0700002585.mm.1 | NM_027318          | Znhit1  | zinc finger, HIT domain containing 1                        | 136982164 | 136988021 | TC0500003429.mm.1 | 0.1  | 0.135665 |
| TC0700002588.mm.1 | ENSMUST00000119135 | Gm15470 | predicted gene 15470                                        | 41490351  | 41491721  | TC0700000731.mm.1 | -0.2 | 0.135677 |
| TC0700002593.mm.1 | ENSMUST00000104755 | Gm23438 | predicted gene, 23438                                       | 10458178  | 10458271  | TC1400000089.mm.1 | 0.4  | 0.135681 |
| TC0700002596.mm.1 | NR_029574          | Mir188  | microRNA 188                                                | 7247989   | 7248056   | TC0X00001770.mm.1 | 0.1  | 0.135695 |
| TC0700002598.mm.1 | ENSMUST00000104415 | Gm22673 | predicted gene, 22673                                       | 59672990  | 59673120  | TC1200000507.mm.1 | -0.5 | 0.135723 |
| TC0700002615.mm.1 | NR_028078          | Snora21 | small nucleolar RNA, H/ACA box 21                           | 97781639  | 97781775  | TC1100003657.mm.1 | -0.9 | 0.135765 |
| TC0700002617.mm.1 | ENSMUST00000119275 | Gm8261  | predicted gene 8261                                         | 146599751 | 146600958 | TC0X00003139.mm.1 | -0.1 | 0.13577  |
| TC0700002627.mm.1 | NR_030465          | Mir692- | microRNA 692-1                                              | 6895229   | 6895337   | TC1700001393.mm.1 | 0.5  | 0.135787 |
| TC0700002628.mm.1 | ENSMUST00000083744 | Gm24261 | predicted gene, 24261                                       | 100604359 | 100604462 | TC1300001138.mm.1 | -0.3 | 0.135805 |
| TC0700002635.mm.1 | NM_198647          | Tbc1d22 | TBC1 domain family, member 22B                              | 29549788  | 29606895  | TC1700002772.mm.1 | -0.1 | 0.135916 |
| TC0700002636.mm.1 | ENSMUST00000120974 | Gm12983 | predicted gene 12983                                        | 135290366 | 135290675 | TC0400003758.mm.1 | -0.1 | 0.135943 |
| TC0700002639.mm.1 | NM_178202          | Hist1h2 | histone cluster 1, H2bp                                     | 21787461  | 21789213  | TC1300000179.mm.1 | -0.2 | 0.136063 |
| TC0700002646.mm.1 | XM_001473986       | Gm2564  | predicted gene 2564                                         | 42629332  | 42631714  | TC0400000412.mm.1 | -0.1 | 0.136077 |
| TC0700002648.mm.1 | ENSMUST00000158959 | Gm23337 | predicted gene, 23337                                       | 45978578  | 45978695  | TC0300000340.mm.1 | 0.1  | 0.136198 |
| TC0700002682.mm.1 | NCBI_Gene:780931:p | Ighv1-5 | immunoglobulin heavy variable 1-53                          | 115158403 | 115158835 | TC1200002630.mm.1 | -1.2 | 0.13621  |
| TC0700002685.mm.1 | NM_013754          | InsI6   | insulin-like 6                                              | 29321344  | 29325356  | TC1900001340.mm.1 | -0.2 | 0.136281 |
| TC0700002694.mm.1 | NM_010510          | Ifnb1   | interferon beta 1, fibroblast                               | 88522025  | 88522794  | TC0400003001.mm.1 | -0.1 | 0.136293 |
| TC0700002696.mm.1 | NM_013495          | Cpt1a   | carnitine palmitoyltransferase 1a, liver                    | 3323301   | 3385733   | TC1900000008.mm.1 | 0.4  | 0.136305 |
| TC0700002697.mm.1 | NR_030451          | Mir682  | microRNA 682                                                | 75644864  | 75645226  | TC1300000910.mm.1 | -0.5 | 0.136341 |
| TC0700002699.mm.1 | NM_001159603       | Pum1    | pumilio 1 (Drosophila)                                      | 130663321 | 130781565 | TC0400001547.mm.1 | -0.2 | 0.136342 |
| TC0700002705.mm.1 | ENSMUST00000157232 | Gm22791 | predicted gene, 22791                                       | 46985337  | 46985481  | TC1800001311.mm.1 | 0.2  | 0.136353 |
| TC0700002714.mm.1 | NM_080446          | Helb    | helicase (DNA) B                                            | 120083608 | 120112987 | TC1000003018.mm.1 | -0.2 | 0.136378 |
| TC0700002716.mm.1 | NM_009774          | Bub3    | budding uninhibited by benzimidazoles 3 homolog A           | 131560379 | 131571898 | TC0700001927.mm.1 | -0.4 | 0.136488 |
| TC0700002718.mm.1 | NR_028522          | Snord13 | small nucleolar RNA, C/D box 13                             | 0         | 0         | TSUnmapped0000017 | -0.7 | 0.136663 |
| TC0700002728.mm.1 | NM_181594          | Edc4    | enhancer of mRNA decapping 4                                | 105880881 | 105895023 | TC0800001232.mm.1 | -0.1 | 0.13682  |
| TC0700002733.mm.1 | ENSMUST00000101903 | Gm25326 | predicted gene, 25326                                       | 47413834  | 47413940  | TC0700000888.mm.1 | -0.9 | 0.137413 |
| TC0700002739.mm.1 | NM_001013806       | Ankrd13 | ankyrin repeat domain 13c                                   | 157947414 | 158006837 | TC0300001581.mm.1 | 0.2  | 0.137436 |
| TC0700002740.mm.1 | NM_144870          | Ndufs8  | NADH dehydrogenase (ubiquinone) Fe-S protein 8              | 3908863   | 3912774   | TC1900000889.mm.1 | -0.3 | 0.137627 |
| TC0700002742.mm.1 | NM_001038651       | Zfp953  | zinc finger protein 953                                     | 67339307  | 67360605  | TC1300002773.mm.1 | -0.2 | 0.137757 |
| TC0700002747.mm.1 | ENSMUST00000083071 | n-R5s79 | nuclear encoded rRNA 5S 79                                  | 88710008  | 88710127  | TC1000002648.mm.1 | 0.1  | 0.137826 |
| TC0700002758.mm.1 | ENSMUST00000182329 | Gm7611  | predicted gene 7611                                         | 20704383  | 20705382  | TC1300001529.mm.1 | -0.2 | 0.137951 |
| TC0700002765.mm.1 | NM_009765          | Bra2    | breast cancer 2                                             | 150522621 | 150570146 | TC0500001865.mm.1 | -0.1 | 0.138014 |

|                   |                    |         |                                                 |           |           |                    |      |          |
|-------------------|--------------------|---------|-------------------------------------------------|-----------|-----------|--------------------|------|----------|
| TC0700002766.mm.1 | ENSMUST00000177614 | Gm23355 | predicted gene, 23355                           | 82543229  | 82543335  | TC1600000929.mm.1  | -0.8 | 0.138189 |
| TC0700002775.mm.1 | NM_021434          | Gpr180  | G protein-coupled receptor 180                  | 118137127 | 118164232 | TC1400001275.mm.1  | 0.1  | 0.13831  |
| TC0700002776.mm.1 | ENSMUST00000082836 | n-R5s29 | nuclear encoded rRNA 5S 29                      | 78858934  | 78859052  | TC1700001189.mm.1  | 0.3  | 0.138339 |
| TC0700002778.mm.1 | XM_884867          | Gm6155  | predicted pseudogene 6155                       | 84834539  | 84841692  | TC0700003660.mm.1  | -0.2 | 0.138432 |
| TC0700002779.mm.1 | NM_053172          | Mepe    | matrix extracellular phosphoglycoprotein with A | 104325329 | 104338611 | TC0500001024.mm.1  | -0.1 | 0.13846  |
| TC0700002781.mm.1 | ENSMUST00000122482 | n-R5s48 | nuclear encoded rRNA 5S 48                      | 77530398  | 77530507  | TC1400001085.mm.1  | 0.1  | 0.138536 |
| TC0700002783.mm.1 | ENSMUST00000102350 | Gm23063 | predicted gene, 23063                           | 17891959  | 17892051  | TC1900001226.mm.1  | 0.2  | 0.138581 |
| TC0700002784.mm.1 | ENSMUST00000178199 | AC13244 | N/A                                             | 30394     | 32306     | TC1_GL456221_rand  | -0.7 | 0.138774 |
| TC0700002787.mm.1 | ENSMUST00000083911 | Gm25189 | predicted gene, 25189                           | 117248271 | 117248434 | TC0200001723.mm.1  | -0.5 | 0.139009 |
| TC0700002791.mm.1 | NM_174849          | Agbl5   | ATP/GTP binding protein-like 5                  | 30888694  | 30906965  | TC0500000303.mm.1  | -0.1 | 0.139038 |
| TC0700002792.mm.1 | ENSMUST00000083193 | Gm26127 | predicted gene, 26127                           | 39027777  | 39027883  | TC0200000720.mm.1  | -0.8 | 0.13913  |
| TC0700002796.mm.1 | NR_037228          | Mir3068 | microRNA 3068                                   | 87437679  | 87437817  | TC1200002126.mm.1  | -0.1 | 0.139301 |
| TC0700002798.mm.1 | NCBI_Gene:10004312 | Gm4242  | Gm4242 predicted gene 4242                      | 61232397  | 61232935  | TC1900001763.mm.1  | -1.0 | 0.139348 |
| TC0700002801.mm.1 | ENSMUST00000122083 | Gm15757 | predicted gene 15757                            | 135006577 | 135006748 | TC0500001571.mm.1  | -0.4 | 0.139453 |
| TC0700002804.mm.1 | NM_001077698       | Fmnl1   | formin-like 1                                   | 103171107 | 103198901 | TC1100001708.mm.1  | -0.4 | 0.139453 |
| TC0700002810.mm.1 | XR_140632          | Gm2163  | predicted gene 2163                             | 42466752  | 42590045  | TC0400000409.mm.1  | 0.1  | 0.139478 |
| TC0700002813.mm.1 | NM_001033496       | Zfp213  | zinc finger protein 213                         | 25566767  | 23564226  | TC1700001593.mm.1  | -0.1 | 0.139486 |
| TC0700002820.mm.1 | ENSMUST00000178455 | Gm6686  | predicted pseudogene 6686                       | 15566161  | 155666421 | TC1700001502.mm.1  | -0.2 | 0.139531 |
| TC0700002821.mm.1 | NM_007750          | Cox8a   | cytochrome c oxidase subunit VIIIa              | 7215158   | 7217616   | TC1900001036.mm.1  | 0.4  | 0.139551 |
| TC0700002824.mm.1 | ENSMUST00000083241 | Gm23686 | predicted gene, 23686                           | 18177462  | 18177625  | TC0300001690.mm.1  | -0.5 | 0.139576 |
| TC0700002828.mm.1 | NR_029727          | Mirlet7 | microRNA let7b                                  | 85707319  | 85707403  | TC1500000819.mm.1  | 0.2  | 0.139785 |
| TC0700002841.mm.1 | ENSMUST00000157787 | Gm24241 | predicted gene, 24241                           | 92688864  | 92689008  | TC1000002687.mm.1  | -0.2 | 0.139879 |
| TC0700002842.mm.1 | NM_001170332       | Clec4a2 | C-type lectin domain family 4, member a2        | 123106428 | 123143999 | TC0600001401.mm.1  | 0.2  | 0.139952 |
| TC0700002849.mm.1 | ENSMUST00000180367 | Gm23148 | predicted gene, 23148                           | 62264314  | 62264420  | TC0400000697.mm.1  | -0.8 | 0.140019 |
| TC0700002872.mm.1 | NR_030459          | Mir687  | microRNA 687                                    | 73206763  | 73206851  | TC1400002384.mm.1  | -0.2 | 0.140107 |
| TC0700002877.mm.1 | NM_011831          | InsI5   | insulin-like 5                                  | 103017872 | 103026842 | TC0400003170.mm.1  | -0.2 | 0.140119 |
| TC0700002880.mm.1 | ENSMUST00000121818 | Gm12920 | predicted gene 12920                            | 10813543  | 10814728  | TC0400000074.mm.1  | -0.1 | 0.14022  |
| TC0700002885.mm.1 | NM_001080390       | Mark2   | MAP/microtubule affinity-regulating kinase 2    | 7275396   | 7341860   | TC1900001039.mm.1  | -0.1 | 0.140256 |
| TC0700002887.mm.1 | NM_175145          | Tmem127 | transmembrane protein 127                       | 127247908 | 127261107 | TC0200001910.mm.1  | 0.1  | 0.140273 |
| TC0700002911.mm.1 | ENSMUST00000096092 | Gm5301  | predicted pseudogene 5301                       | 23165338  | 23167413  | TC0600001928.mm.1  | -0.1 | 0.140375 |
| TC0700002912.mm.1 | ENSMUST00000082985 | Gm22572 | predicted gene, 22572                           | 25208623  | 25208727  | TC0200000400.mm.1  | -0.2 | 0.140382 |
| TC0700002918.mm.1 | NM_009463          | Ucp1    | uncoupling protein 1 (mitochondrial, proton car | 83290348  | 83298456  | TC0800000919.mm.1  | -0.9 | 0.140494 |
| TC0700002919.mm.1 | ENSMUST00000083157 | Gm23678 | predicted gene, 23678                           | 19762668  | 19762774  | TC0X00001917.mm.1  | -0.5 | 0.140559 |
| TC0700002927.mm.1 | NM_138601          | D10Jhu8 | DNA segment, Chr 10, Johns Hopkins University   | 78162067  | 78169768  | TC1000002442.mm.1  | 0.4  | 0.140668 |
| TC0700002930.mm.1 | ENSMUST00000104067 | Gm26078 | predicted gene, 26078                           | 96762031  | 96762158  | TC0100000965.mm.1  | 0.1  | 0.140695 |
| TC0700002938.mm.1 | NM_194350          | Mafa    | v-maf musculoaponeurotic fibrosarcoma oncoge    | 75746843  | 75747922  | TC1500001743.mm.1  | -0.1 | 0.140737 |
| TC0700002939.mm.1 | ENSMUST00000120893 | Gm5389  | predicted gene 5389                             | 57659732  | 57660907  | TC0X00000535.mm.1  | 0.1  | 0.14078  |
| TC0700002944.mm.1 | NM_019553          | Ddx21   | DEAD (Asp-Glu-Ala-Asp) box polypeptide 21       | 62580247  | 62602298  | TC1000002264.mm.1  | -0.3 | 0.140798 |
| TC0700002950.mm.1 | NM_026393          | Nmral1  | Nmra-like family domain containing 1            | 4710059   | 4719356   | TC1600001135.mm.1  | -0.1 | 0.140868 |
| TC0700002967.mm.1 | XM_001474822       | Gm2808  | predicted gene 2808                             | 6509483   | 6583118   | TC1700001385.mm.1  | -0.2 | 0.140943 |
| TC0700002974.mm.1 | XM_003688870       | LOC2158 | uncharacterized LOC215866                       | 25902398  | 25903940  | TC1000000229.mm.1  | -0.2 | 0.141001 |
| TC0700002984.mm.1 | NM_023633          | 2410016 | RIKEN cDNA 2410016O06 gene                      | 83950608  | 83952953  | TC1200000796.mm.1  | -0.2 | 0.141044 |
| TC0700002988.mm.1 | NM_029852          | Ccdc41  | coiled-coil domain containing 41                | 94688790  | 94790336  | TC1000001153.mm.1  | -0.2 | 0.14118  |
| TC0700002990.mm.1 | NM_028283          | Uaca    | uveal autoantigen with coiled-coil domains and  | 60794548  | 60880370  | TC0900000769.mm.1  | 0.2  | 0.141267 |
| TC0700002991.mm.1 | NCBI_Gene:629859:p | Ighv1-1 | Ighv1-11 immunoglobulin heavy variable V1-11    | 114612244 | 114612536 | TC1200002606.mm.1  | -0.7 | 0.141348 |
| TC0700002993.mm.1 | NM_029690          | Actrt3  | actin related protein T3                        | 30599703  | 30599939  | TC0300001786.mm.1  | -0.2 | 0.141375 |
| TC0700003000.mm.1 | ENSMUST00000179499 | Gm24863 | predicted gene, 24863                           | 79454970  | 79455076  | TC1300000956.mm.1  | -0.7 | 0.141507 |
| TC0700003005.mm.1 | NM_019742          | Tusc2   | tumor suppressor candidate 2                    | 107563255 | 107566108 | TC0900001374.mm.1  | 0.1  | 0.141515 |
| TC0700003006.mm.1 | ENSMUST00000083261 | Gm26071 | predicted gene, 26071                           | 35441190  | 35441296  | TC1200000308.mm.1  | -0.8 | 0.141559 |
| TC0700003007.mm.1 | ENSMUST00000083372 | Gm23264 | predicted gene, 23264                           | 66086094  | 66086200  | TC1700001082.mm.1  | -0.7 | 0.141776 |
| TC0700003017.mm.1 | ENSMUST00000175017 | Gm25026 | predicted gene, 25026                           | 145878286 | 145878473 | TC0200002168.mm.1  | 0.2  | 0.141798 |
| TC0700003022.mm.1 | ENSMUST00000082845 | Gm22997 | predicted gene, 22997                           | 110218003 | 110218109 | TC0200001630.mm.1  | -0.8 | 0.141832 |
| TC0700003023.mm.1 | NM_013818          | Gtpbp1  | GTP binding protein 1                           | 79690895  | 79721479  | TC1500000679.mm.1  | -0.3 | 0.1423   |
| TC0700003024.mm.1 | NM_145391          | Tapbp1  | TAP binding protein-like                        | 125223933 | 125231860 | TC0600003139.mm.1  | -0.2 | 0.142322 |
| TC0700003026.mm.1 | ENSMUST00000104034 | Gm22270 | predicted gene, 22270                           | 107905177 | 107905308 | TC0500001088.mm.1  | -1.1 | 0.142449 |
| TC0700003028.mm.1 | NM_015751          | Abce1   | ATP-binding cassette, sub-family E (OABP), mem  | 79683442  | 79711740  | TC0800002523.mm.1  | -0.2 | 0.142487 |
| TC0700003030.mm.1 | ENSMUST00000179018 | Gm22969 | predicted gene, 22969                           | 46450413  | 46450519  | TC0700000876.mm.1  | -0.8 | 0.142495 |
| TC0700003041.mm.1 | NM_183146          | A530054 | RIKEN cDNA A530054K11 gene                      | 67617001  | 67637791  | TC1300002255.mm.1  | -0.4 | 0.142499 |
| TC0700003043.mm.1 | NM_008477          | Ktn1    | kinectin 1                                      | 47649311  | 47736564  | TC1400000517.mm.1  | -0.2 | 0.142531 |
| TC0700003059.mm.1 | NM_011876          | Twf2    | twinfilin, actin-binding protein, homolog 2 (Dr | 106203108 | 106215389 | TC0900001337.mm.1  | -0.3 | 0.142541 |
| TC0700003061.mm.1 | ENSMUST00000097218 | Gm9008  | predicted pseudogene 9008                       | 76495475  | 76497784  | TC0600002518.mm.1  | -0.3 | 0.142642 |
| TC0700003066.mm.1 | ENSMUST00000120905 | Gm12180 | predicted gene 12180                            | 48568355  | 48569015  | TC1100000490.mm.1  | -0.1 | 0.142687 |
| TC0700003089.mm.1 | NM_011653          | Tuba1a  | tubulin, alpha 1A                               | 98949839  | 98953551  | TC1500002200.mm.1  | 0.3  | 0.142735 |
| TC0700003092.mm.1 | NM_146211          | Glt25d1 | glycosyltransferase 25 domain containing 1      | 71610998  | 71624911  | TC0800000798.mm.1  | 0.1  | 0.14282  |
| TC0700003113.mm.1 | NM_001099327       | Gm14305 | predicted gene 14305                            | 176708328 | 176721813 | TC02000005490.mm.1 | 0.5  | 0.142835 |
| TC0700003115.mm.1 | NM_145360          | Idi1    | isopentenyl-diphosphate delta isomerase         | 8885501   | 8892451   | TC1300000045.mm.1  | -0.1 | 0.142897 |
| TC0700003135.mm.1 | ENSMUST00000116893 | Gm22709 | predicted gene, 22709                           | 5614473   | 5614583   | TC1800000030.mm.1  | -0.2 | 0.143121 |
| TC0700003136.mm.1 | NM_012021          | Prdx5   | peroxiredoxin 5                                 | 6906697   | 6910106   | TC1900001019.mm.1  | 0.2  | 0.143125 |
| TC0700003142.mm.1 | ENSMUST00000116760 | Gm26472 | predicted gene, 26472                           | 159331796 | 159331878 | TC0100003343.mm.1  | 0.4  | 0.1432   |
| TC0700003143.mm.1 | NM_172938          | Scml4   | sex comb on midleg-like 4 (Drosophila)          | 42860370  | 42960782  | TC1000000388.mm.1  | -0.1 | 0.1432   |
| TC0700003145.mm.1 | ENSMUST00000116695 | Gm24586 | predicted gene, 24586                           | 96266851  | 96266941  | TC0100002852.mm.1  | 0.5  | 0.143202 |
| TC0700003146.mm.1 | OTTMUST00000062943 | AC16411 | ---                                             | 144723627 | 144723812 | TC0500003581.mm.1  | -0.3 | 0.143232 |
| TC0700003148.mm.1 | NR_030566          | Mir466f | microRNA 466f-1                                 | 12071790  | 12413554  | TC1900000238.mm.1  | 0.5  | 0.143274 |
| TC0700003151.mm.1 | ENSMUST00000116799 | Gm25738 | predicted gene, 25738                           | 83508654  | 83508745  | TC0600002573.mm.1  | 0.5  | 0.143488 |
| TC0700003154.mm.1 | NR_030571          | Mir467c | microRNA 467c                                   | 10473931  | 10474027  | TC0200000104.mm.1  | 0.2  | 0.143507 |
| TC0700003156.mm.1 | ENSMUST00000179876 | Gm25939 | predicted gene, 25939                           | 72255008  | 72255198  | TC0100000600.mm.1  | -0.9 | 0.143525 |
| TC0700003157.mm.1 | ENSMUST00000179159 | Gm24112 | predicted gene, 24112                           | 40850144  | 40850226  | TC0400002451.mm.1  | 0.4  | 0.143536 |
| TC0700003160.mm.1 | ENSMUST00000104867 | Gm22824 | predicted gene, 22824                           | 28608195  | 28608286  | TC0200000489.mm.1  | 0.4  | 0.143555 |

|                   |                     |         |                                                 |           |           |                    |      |          |
|-------------------|---------------------|---------|-------------------------------------------------|-----------|-----------|--------------------|------|----------|
| TC0700003161.mm.1 | NM_023670           | Igf2bp3 | insulin-like growth factor 2 mRNA binding prote | 49085218  | 49214954  | TC0600002237.mm.1  | -0.2 | 0.143556 |
| TC0700003162.mm.1 | NM_146035           | Mgat2   | mannoside acetylglucosaminyltransferase 2       | 69184157  | 69186773  | TC1200000563.mm.1  | -0.2 | 0.143562 |
| TC0700003164.mm.1 | NR_030500           | Mir721  | microRNA 721                                    | 136375716 | 136375803 | TC0500003420.mm.1  | -0.2 | 0.143634 |
| TC0700003165.mm.1 | ENSMUST00000163472  | Gm17349 | predicted gene, 17349                           | 99702176  | 99705490  | TC1500002219.mm.1  | -0.1 | 0.143687 |
| TC0700003166.mm.1 | ENSMUST00000103887  | Gm23358 | predicted gene, 23358                           | 8588615   | 8588724   | TC0100001935.mm.1  | -0.2 | 0.143806 |
| TC0700003167.mm.1 | XR_141374           | LOC1008 | uncharacterized LOC100861913                    | 41005013  | 41013815  | TC1900001500.mm.1  | -0.1 | 0.14385  |
| TC0700003168.mm.1 | NM_198012           | Trim68  | tripartite motif-containing 68                  | 102677579 | 102687326 | TC0700003865.mm.1  | 0.1  | 0.143875 |
| TC0700003172.mm.1 | NM_028427           | Tmem192 | transmembrane protein 192                       | 64947185  | 64969037  | TC0800000674.mm.1  | 0.1  | 0.143894 |
| TC0700003173.mm.1 | ENSMUST00000160079  | Gm3355  | predicted gene 3355                             | 13862317  | 13862803  | TC1700001478.mm.1  | -0.5 | 0.143934 |
| TC0700003175.mm.1 | ENSMUST00000055613  | Gm7327  | predicted gene 7327                             | 61785381  | 61786032  | TC0X00000568.mm.1  | -0.3 | 0.144019 |
| TC0700003177.mm.1 | NM_144901           | Csde1   | cold shock domain containing E1, RNA binding    | 103020546 | 103058189 | TC0300001040.mm.1  | 0.2  | 0.144081 |
| TC0700003180.mm.1 | ENSMUST00000158652  | Gm24546 | predicted gene, 24546                           | 18679128  | 18679229  | TC0900000138.mm.1  | 0.2  | 0.144128 |
| TC0700003183.mm.1 | NM_001110515        | Psmg4   | proteasome (prosome, macropain) assembly ch     | 34162964  | 34178172  | TC1300000392.mm.1  | -0.1 | 0.14415  |
| TC0700003186.mm.1 | ENSMUST00000089098  | Gm7735  | predicted gene 7735                             | 89169490  | 89169648  | TC1600000974.mm.1  | -0.3 | 0.144333 |
| TC0700003187.mm.1 | ENSMUST00000179935  | LOC1010 | protein FAM205A-like // protein FAM205A-like    | 23801     | 25222     | TC4_GL456350_rand  | 0.2  | 0.144378 |
| TC0700003188.mm.1 | ENSMUST00000140182  | Gm12612 | predicted gene 12612                            | 60669140  | 60671125  | TC1100002890.mm.1  | -0.1 | 0.144455 |
| TC0700003189.mm.1 | NM_145156           | Slc25a2 | solute carrier family 25, member 28             | 43663801  | 43674881  | TC1900001544.mm.1  | 0.1  | 0.14447  |
| TC0700003190.mm.1 | XR_106143           | G430095 | RIKEN cDNA G430095P16 gene                      | 84723007  | 84726846  | TC0800000960.mm.1  | 0.1  | 0.144479 |
| TC0700003192.mm.1 | ENSMUST00000082827  | Gm23514 | predicted gene, 23514                           | 25685140  | 25685269  | TC1100000262.mm.1  | -0.3 | 0.144534 |
| TC0700003193.mm.1 | ENSMUST00000180171  | Gm25196 | predicted gene, 25196                           | 23406996  | 23407105  | TC0700000352.mm.1  | -0.1 | 0.144555 |
| TC0700003195.mm.1 | NM_001161730        | Tap1    | transporter 1, ATP-binding cassette, sub-family | 34187553  | 34197225  | TC1700000621.mm.1  | -0.3 | 0.144705 |
| TC0700003196.mm.1 | NM_053164           | Mrpl43  | mitochondrial ribosomal protein L43             | 45005014  | 45006442  | TC1900001569.mm.1  | -0.2 | 0.144786 |
| TC0700003197.mm.1 | NM_021518           | Rab2a   | RAB2A, member RAS oncogene family               | 8535644   | 8607778   | TC0400000052.mm.1  | 0.2  | 0.144827 |
| TC0700003198.mm.1 | ENSMUST00000120406  | Gm15554 | predicted gene 15554                            | 75772159  | 75773071  | TC1600001918.mm.1  | -0.1 | 0.145089 |
| TC0700003200.mm.1 | NM_130864           | Acaa1a  | acetyl-Coenzyme A acyltransferase 1A            | 119339676 | 119350299 | TC0900001576.mm.1  | 0.1  | 0.145097 |
| TC0700003202.mm.1 | ENSMUST000000083459 | Gm24861 | predicted gene, 24861                           | 78624747  | 78624853  | TC1600000902.mm.1  | -0.3 | 0.145172 |
| TC0700003203.mm.1 | NM_018798           | Ubqln2  | ubiquilin 2                                     | 153498227 | 153501570 | TC0X00001558.mm.1  | 0.3  | 0.145312 |
| TC0700003204.mm.1 | NM_027181           | Pin4    | protein (peptidyl-prolyl cis/trans isomerase) N | 102119447 | 102127673 | TC0X00000990.mm.1  | -0.2 | 0.145507 |
| TC0700003206.mm.1 | ENSMUST00000179057  | Gm25101 | predicted gene, 25101                           | 21114369  | 21114475  | TC1500000140.mm.1  | -0.6 | 0.145543 |
| TC0700003207.mm.1 | NR_039564           | Mir5105 | microRNA 5105                                   | 146261003 | 146261084 | TC0500001782.mm.1  | 0.4  | 0.145583 |
| TC0700003208.mm.1 | NM_011894           | Sh3bp5  | SH3-domain binding protein 5 (BTK-associated)   | 31359880  | 31436078  | TC1400001676.mm.1  | 0.4  | 0.145595 |
| TC0700003209.mm.1 | ENSMUST00000104115  | Gm22472 | predicted gene, 22472                           | 101242738 | 101242871 | TC0X00000969.mm.1  | -0.1 | 0.145663 |
| TC0700003211.mm.1 | ENSMUST00000098035  | Gm21286 | predicted gene, 21286                           | 60838256  | 60839649  | TC0400000679.mm.1  | 0.2  | 0.145749 |
| TC0700003212.mm.1 | ENSMUST00000175077  | Gm22695 | predicted gene, 22695                           | 117546972 | 117547026 | TC0800003010.mm.1  | 0.3  | 0.145861 |
| TC0700003213.mm.1 | NR_035469           | Mir1947 | microRNA 1947                                   | 33105361  | 33105445  | TC1600000463.mm.1  | -0.2 | 0.145868 |
| TC0700003214.mm.1 | NM_001195097        | 3425401 | RIKEN cDNA 3425401B19 gene                      | 32659119  | 32685272  | TC1400001708.mm.1  | 0.1  | 0.145908 |
| TC0700003215.mm.1 | ENSMUST00000180226  | Gm23144 | predicted gene, 23144                           | 88835300  | 88835406  | TC1500000853.mm.1  | -0.8 | 0.145921 |
| TC0700003216.mm.1 | ENSMUST00000095940  | Rpl21-p | ribosomal protein L21, pseudogene 5             | 83371251  | 83371733  | TC1600001957.mm.1  | -0.6 | 0.145943 |
| TC0700003217.mm.1 | ENSMUST00000117265  | Gm6134  | predicted pseudogene 6134                       | 112976213 | 112976383 | TC0600001237.mm.1  | -0.6 | 0.146014 |
| TC0700003218.mm.1 | ENSMUST00000082908  | Gm26206 | predicted gene, 26206                           | 3102016   | 3102125   | TC0100000003.mm.1  | -0.2 | 0.146189 |
| TC0700003219.mm.1 | NM_001163729        | Klhdc3  | kelch domain containing 3                       | 46674550  | 46680930  | TC1700002185.mm.1  | -0.2 | 0.146219 |
| TC0700003220.mm.1 | NM_019518           | Grasp   | GRP1 (general receptor for phosphoinositides 1) | 101224207 | 101232756 | TC1500001065.mm.1  | 0.2  | 0.146246 |
| TC0700003221.mm.1 | NM_134229           | Vmn1r67 | vomer nasal 1 receptor 67                       | 10446789  | 10447787  | TC0700000107.mm.1  | 0.1  | 0.146284 |
| TC0700003222.mm.1 | NM_001002898        | Sirpb1a | signal-regulatory protein beta 1A               | 15371827  | 15575065  | TC0300001674.mm.1  | 0.1  | 0.146348 |
| TC0700003223.mm.1 | XM_001472546        | Gm12693 | predicted gene 12693                            | 94929401  | 94936269  | TC0400000954.mm.1  | -0.2 | 0.146366 |
| TC0700003224.mm.1 | NM_010748           | Lyst    | lysosomal trafficking regulator                 | 13590409  | 13777440  | TC1300000089.mm.1  | -0.3 | 0.14646  |
| TC0700003225.mm.1 | NM_019930           | Ranbp9  | RAN binding protein 9                           | 43402673  | 43480973  | TC1300001882.mm.1  | -0.2 | 0.146466 |
| TC0700003226.mm.1 | ENSMUST00000173935  | Skiv2l- | superkiller viralicidic activity 2-like (S. cer | 34769833  | 34771228  | TC1700001925.mm.1  | -0.1 | 0.146531 |
| TC0700003227.mm.1 | ENSMUST00000184975  | AC12361 | N/A                                             | 7975328   | 7975407   | TC1500000052.mm.1  | -0.8 | 0.146571 |
| TC0700003228.mm.1 | NM_025851           | 1700010 | RIKEN cDNA 1700010I14 gene                      | 8988333   | 9008319   | TC1700000096.mm.1  | -0.1 | 0.146715 |
| TC0700003229.mm.1 | ENSMUST00000052897  | Tmsb10  | thymosin, beta 10                               | 24862202  | 24862697  | TC0700000399.mm.1  | -0.4 | 0.146748 |
| TC0700003232.mm.1 | ENSMUST00000119322  | Gm13198 | predicted gene 13198                            | 5156392   | 5157217   | TC0200000049.mm.1  | -0.1 | 0.146781 |
| TC0700003233.mm.1 | NM_007761           | Crcp    | calcitonin gene-related peptide-receptor compo  | 130029290 | 130060790 | TC0500001521.mm.1  | -0.2 | 0.146795 |
| TC0700003236.mm.1 | NM_009749           | Bex2    | brain expressed X-linked 2                      | 136066564 | 136068236 | TC0X000003018.mm.1 | -0.1 | 0.146828 |
| TC0700003257.mm.1 | ENSMUST000000082638 | Gm25801 | predicted gene, 25801                           | 100769023 | 100769128 | TC1200002234.mm.1  | -0.8 | 0.146838 |
| TC0700003258.mm.1 | NM_001168497        | Plscr3  | phospholipid scramblase 3                       | 69846372  | 69852058  | TC1100000926.mm.1  | 0.1  | 0.146991 |
| TC0700003259.mm.1 | ENSMUST00000083426  | Gm24412 | predicted gene, 24412                           | 97521808  | 97521916  | TC0700001355.mm.1  | -0.4 | 0.147095 |
| TC0700003260.mm.1 | ENSMUST00000157924  | Gm24959 | predicted gene, 24959                           | 20844447  | 20844592  | TC1800001050.mm.1  | -0.2 | 0.147257 |
| TC0700003262.mm.1 | ENSMUST00000082950  | Gm24204 | predicted gene, 24204                           | 80088447  | 80088553  | TC1500001900.mm.1  | -0.7 | 0.14737  |
| TC0700003263.mm.1 | ENSMUST00000170118  | Gm17113 | predicted gene 17113                            | 29183036  | 29183383  | TC0700000525.mm.1  | -0.1 | 0.147554 |
| TC0700003264.mm.1 | ENSMUST00000116935  | Gm23086 | predicted gene, 23086                           | 49637682  | 49637774  | TC1300000570.mm.1  | 0.4  | 0.14765  |
| TC0700003265.mm.1 | NCBI_Gene:626583:p  | Igkv3-2 | immunoglobulin kappa variable 3-2               | 70698468  | 70699067  | TC0600003530.mm.1  | -1.4 | 0.147993 |
| TC0700003266.mm.1 | NCBI_Gene:626347:p  | Igkv3-4 | immunoglobulin kappa variable 3-4               | 70671789  | 70672377  | TC0600003528.mm.1  | -0.8 | 0.148041 |
| TC0700003267.mm.1 | NM_001081975        | Mfap1b  | microfibrillar-associated protein 1B            | 121460235 | 121474067 | TC0200004491.mm.1  | -0.3 | 0.14814  |
| TC0700003268.mm.1 | NR_028513           | Snora73 | small nucleolar RNA, H/ACA box 73b              | 0         | 0         | TSUnmapped0000017  | -0.8 | 0.148176 |
| TC0700003269.mm.1 | ENSMUST00000157563  | Gm22214 | predicted gene, 22214                           | 136096260 | 136096431 | TC0500003412.mm.1  | 0.1  | 0.148182 |
| TC0700003272.mm.1 | ENSMUST00000104700  | Gm22901 | predicted gene, 22901                           | 146399134 | 146399217 | TC0300003098.mm.1  | 0.3  | 0.148208 |
| TC0700003273.mm.1 | NM_010555           | Il1r2   | interleukin 1 receptor, type II                 | 40084768  | 40125227  | TC0100000292.mm.1  | -0.1 | 0.148217 |
| TC0700003274.mm.1 | NM_146097           | Cbwd1   | COBW domain containing 1                        | 24919916  | 24961616  | TC1900001289.mm.1  | -0.1 | 0.148256 |
| TC0700003275.mm.1 | NR_029572           | Mir186  | microRNA 186                                    | 157544279 | 157544349 | TC0300001577.mm.1  | -0.2 | 0.148308 |
| TC0700003276.mm.1 | NM_010431           | Hif1a   | hypoxia inducible factor 1, alpha subunit       | 73901375  | 73947530  | TC1200000652.mm.1  | -0.2 | 0.148337 |
| TC0700003277.mm.1 | ENSMUST00000158453  | Gm24502 | predicted gene, 24502                           | 75561046  | 75561150  | TC0500002620.mm.1  | -0.2 | 0.148339 |
| TC0700003278.mm.1 | ENSMUST00000083809  | Gm25008 | predicted gene, 25008                           | 45620679  | 45620759  | TC1700000867.mm.1  | -0.8 | 0.148384 |
| TC0700003279.mm.1 | NM_134158           | AF25170 | cDNA sequence AF251705                          | 114996721 | 115001880 | TC1100004054.mm.1  | 0.1  | 0.14844  |
| TC0700003280.mm.1 | NM_001193666        | Gm13304 | predicted gene 13304                            | 42114787  | 42115917  | TC0400000394.mm.1  | -0.8 | 0.148513 |
| TC0700003281.mm.1 | ENSMUST00000183020  | Gm5710  | predicted gene 5710                             | 121180103 | 121181097 | TC0300002837.mm.1  | -0.1 | 0.148532 |
| TC0700003282.mm.1 | NM_001024560        | Snx32   | sorting nexin 32                                | 5494848   | 5510489   | TC1900000971.mm.1  | 0.1  | 0.148674 |
| TC0700003283.mm.1 | NM_007756           | Cplx1   | complexin 1                                     | 108518554 | 108550027 | TC0500002947.mm.1  | -0.1 | 0.148754 |

|                   |                    |         |                                                 |           |           |                    |      |          |
|-------------------|--------------------|---------|-------------------------------------------------|-----------|-----------|--------------------|------|----------|
| TC0700003284.mm.1 | ENSMUST00000083005 | Gm23721 | predicted gene, 23721                           | 61936446  | 61936552  | TC1100002928.mm.1  | -0.8 | 0.148783 |
| TC0700003285.mm.1 | ENSMUST00000158667 | Gm23209 | predicted gene, 23209                           | 150321193 | 150321302 | TC0400001977.mm.1  | 0.2  | 0.148824 |
| TC0700003286.mm.1 | NM_019729          | Usp8    | ubiquitin specific peptidase 8                  | 126707328 | 126759314 | TC0200001900.mm.1  | 0.2  | 0.148922 |
| TC0700003287.mm.1 | ENSMUST00000116897 | Gm22712 | predicted gene, 22712                           | 60954060  | 60954133  | TC0200003616.mm.1  | 0.2  | 0.148932 |
| TC0700003288.mm.1 | NM_148947          | Ly6g5c  | lymphocyte antigen 6 complex, locus G5C         | 35108279  | 35111991  | TC1700000667.mm.1  | -0.1 | 0.149091 |
| TC0700003289.mm.1 | NM_025503          | 1700029 | RIKEN cDNA 1700029P11 gene                      | 81980540  | 81981563  | TC1500000735.mm.1  | -0.1 | 0.149226 |
| TC0700003290.mm.1 | NM_175406          | Atp6v0d | ATPase, H+ transporting, lysosomal V0 subunit D | 19876838  | 19922605  | TC0400002275.mm.1  | 0.5  | 0.149259 |
| TC0700003291.mm.1 | NR_029419          | Tmem161 | transmembrane protein 161B                      | 84222296  | 84295966  | TC1300000983.mm.1  | -0.1 | 0.149328 |
| TC0700003292.mm.1 | ENSMUST00000071781 | Gm9234  | predicted pseudogene 9234 // peptidylprolyl is  | 96895617  | 96896352  | TC0900001219.mm.1  | -0.4 | 0.149334 |
| TC0700003293.mm.1 | ENSMUST00000144091 | Gm16357 | predicted gene 16357                            | 176116023 | 176117866 | TC0200005345.mm.1  | 0.3  | 0.149376 |
| TC0700003294.mm.1 | NM_028976          | Gorasp1 | golgi reassembly stacking protein 1             | 119925673 | 119937558 | TC0900003249.mm.1  | 0.1  | 0.149471 |
| TC0700003295.mm.1 | NM_001253386       | Serinc2 | serine incorporator 2                           | 130253495 | 130279205 | TC0400003629.mm.1  | -0.1 | 0.149473 |
| TC0700003296.mm.1 | NM_001013369       | Pfdn4   | prefoldin 4                                     | 170496428 | 170519123 | TC0200002645.mm.1  | -0.1 | 0.149499 |
| TC0700003297.mm.1 | NM_025584          | Cd99    | CD99 antigen                                    | 0         | 0         | TSUnmapped0000003  | 0.2  | 0.14963  |
| TC0700003298.mm.1 | ENSMUST00000104774 | Gm24603 | predicted gene, 24603                           | 121970552 | 121970637 | TC0200001831.mm.1  | 0.4  | 0.149653 |
| TC0700003299.mm.1 | ENSMUST00000082730 | Gm24459 | predicted gene, 24459                           | 124357238 | 124357323 | TC0800001543.mm.1  | -0.2 | 0.149823 |
| TC0700003300.mm.1 | NM_011774          | Slc30a4 | solute carrier family 30 (zinc transporter), me | 122681233 | 122702663 | TC0200004512.mm.1  | -0.2 | 0.150102 |
| TC0700003301.mm.1 | NM_008592          | Foxc1   | forkhead box C1                                 | 31806646  | 31810643  | TC1300000353.mm.1  | 0.1  | 0.150347 |
| TC0700003302.mm.1 | NM_197993          | Tut1    | terminal uridylyl transferase 1, U6 snRNA-speci | 8953847   | 8966210   | TC1900000169.mm.1  | -0.1 | 0.150384 |
| TC0700003303.mm.1 | NR_027817          | 1500011 | RIKEN cDNA 1500011B03 gene                      | 114808196 | 114813976 | TC0500003734.mm.1  | -0.1 | 0.150599 |
| TC0700003304.mm.1 | ENSMUST00000175101 | Gm24333 | predicted gene, 24333                           | 65093831  | 65093914  | TC0800002323.mm.1  | -0.3 | 0.150867 |
| TC0700003305.mm.1 | NM_022328          | Mllt1   | myeloid/lymphoid or mixed-lineage leukemia (tr  | 56892611  | 56935388  | TC1700002339.mm.1  | -0.1 | 0.150932 |
| TC0700003306.mm.1 | NM_028543          | Zfp763  | zinc finger protein 763                         | 33016863  | 33033402  | TC1700001860.mm.1  | -0.1 | 0.150963 |
| TC0700003307.mm.1 | NM_026156          | Xab2    | XPA binding protein 2                           | 3608421   | 3621316   | TC0800001612.mm.1  | -0.2 | 0.151033 |
| TC0700003308.mm.1 | NM_026383          | Pnrc2   | proline-rich nuclear receptor coactivator 2     | 135870918 | 135873850 | TC0400003773.mm.1  | -0.3 | 0.151102 |
| TC0700003309.mm.1 | ENSMUST00000157640 | Gm24784 | predicted gene, 24784                           | 103588704 | 103588765 | TC0600001174.mm.1  | -0.2 | 0.15112  |
| TC0700003310.mm.1 | ENSMUST00000184408 | Vax2os1 | Vax2os1 conserved region 3                      | 83710739  | 83710932  | TC18000000934.mm.1 | -0.1 | 0.151218 |
| TC0700003311.mm.1 | ENSMUST00000118492 | Gm15913 | predicted gene 15913                            | 13353876  | 13354007  | TC1400001465.mm.1  | -0.2 | 0.151316 |
| TC0700003312.mm.1 | NM_133357          | Krt75   | keratin 75                                      | 101563343 | 101573904 | TC1500002264.mm.1  | -0.1 | 0.15132  |
| TC0700003313.mm.1 | ENSMUST00000176889 | Gm20691 | predicted gene 20691                            | 68903820  | 68904152  | TC0300002125.mm.1  | -0.1 | 0.15133  |
| TC0700003314.mm.1 | NR_030475          | Mir695  | microRNA 695                                    | 155356817 | 155356925 | TC0200002364.mm.1  | -0.1 | 0.151416 |
| TC0700003315.mm.1 | ENSMUST00000072582 | Fabp5l2 | fatty acid binding protein 5-like 2             | 7581516   | 7581517   | TC1800000050.mm.1  | -0.4 | 0.151468 |
| TC0700003316.mm.1 | NM_008750          | Nxn     | nucleoredoxin                                   | 76257198  | 76399141  | TC1100003240.mm.1  | -0.1 | 0.151495 |
| TC0700003317.mm.1 | NM_013566          | Itgb7   | integrin beta 7                                 | 102215995 | 102231935 | TC1500002288.mm.1  | -0.1 | 0.151705 |
| TC0700003318.mm.1 | NM_178648          | Ubxn8   | UBX domain protein 8                            | 33619586  | 33641976  | TC0800002008.mm.1  | 0.2  | 0.151988 |
| TC0700003319.mm.1 | NM_025683          | Rpe     | ribulose-5-phosphate-3-epimerase                | 66700831  | 66719805  | TC0100000561.mm.1  | 0.2  | 0.152026 |
| TC0700003320.mm.1 | NM_134136          | Fbxo38  | F-box protein 38                                | 62504059  | 62548743  | TC1800001441.mm.1  | -0.2 | 0.152067 |
| TC0700003321.mm.1 | ENSMUST00000101915 | Gm26002 | predicted gene, 26002                           | 128650997 | 128651103 | TC0800001597.mm.1  | -0.3 | 0.152092 |
| TC0700003322.mm.1 | ENSMUST00000119257 | Gm11598 | predicted gene 11598                            | 100243273 | 100243629 | TC1100001619.mm.1  | -0.3 | 0.152118 |
| TC0700003323.mm.1 | NM_028576          | Camkmt  | calmodulin-lysine N-methyltransferase           | 85090552  | 85458580  | TC1700001270.mm.1  | 0.1  | 0.152142 |
| TC0700003324.mm.1 | ENSMUST00000139800 | Gm5353  | predicted gene 5353                             | 76862256  | 76863048  | TC0800002494.mm.1  | -0.1 | 0.152217 |
| TC0700003325.mm.1 | ENSMUST00000120761 | Gm7823  | predicted gene 7823                             | 133093940 | 133095562 | TC0X00002979.mm.1  | -0.2 | 0.152242 |
| TC0700003326.mm.1 | NM_177003          | 9630033 | RIKEN cDNA 9630033F20 gene                      | 127085116 | 127109552 | TC0600003168.mm.1  | 0.1  | 0.152398 |
| TC0700003327.mm.1 | NM_001101475       | F830016 | RIKEN cDNA F830016B08 gene                      | 60293380  | 60303016  | TC1800000609.mm.1  | -0.2 | 0.152431 |
| TC0700003328.mm.1 | ENSMUST00000157256 | Gm22442 | predicted gene, 22442                           | 69350518  | 69350661  | TC1100003038.mm.1  | -0.3 | 0.152543 |
| TC0700003329.mm.1 | ENSMUST00000173587 | Vmn2r-p | vomeronasal 2, receptor, pseudogene 41          | 9176976   | 9180099   | TC0700002283.mm.1  | 0.1  | 0.15263  |
| TC0700003330.mm.1 | NM_009295          | Stxbp1  | syntaxin binding protein 1                      | 32787602  | 32847239  | TC0200003313.mm.1  | 0.1  | 0.152633 |
| TC0700003331.mm.1 | ENSMUST00000104868 | Gm25172 | predicted gene, 25172                           | 70039104  | 70039190  | TC0800000731.mm.1  | 0.4  | 0.152652 |
| TC0700003333.mm.1 | NR_046144          | n-R5s13 | nuclear encoded rRNA 5S 136                     | 123599859 | 123599979 | TC0800003140.mm.1  | -0.7 | 0.152719 |
| TC0700003334.mm.1 | ENSMUST00000055871 | Gm4989  | predicted pseudogene 4989                       | 74566925  | 74567706  | TC0X00000719.mm.1  | 0.1  | 0.152787 |
| TC0700003335.mm.1 | NM_028812          | Gtf2e1  | general transcription factor II E, polypeptide  | 37590790  | 37539789  | TC1600001592.mm.1  | -0.1 | 0.152797 |
| TC0700003336.mm.1 | NM_001029933       | Zfp114  | zinc finger protein 114                         | 24175045  | 24182879  | TC0700000371.mm.1  | -0.1 | 0.152866 |
| TC0700003337.mm.1 | ENSMUST00000120343 | Gm14984 | predicted gene 14984                            | 130400957 | 130402219 | TC0X00002964.mm.1  | -0.1 | 0.152936 |
| TC0700003338.mm.1 | NM_026403          | Nop9    | NOP9 nucleolar protein                          | 55745693  | 55755634  | TC1400000791.mm.1  | -0.2 | 0.152975 |
| TC0700003339.mm.1 | NM_019773          | Rab9    | RAB9, member RAS oncogene family                | 166457252 | 166479867 | TC0X00003346.mm.1  | 0.2  | 0.152982 |
| TC0700003340.mm.1 | NM_025597          | Ndufb3  | NADH dehydrogenase (ubiquinone) 1 beta subcc    | 58586384  | 58595964  | TC0100000436.mm.1  | 0.3  | 0.153025 |
| TC0700003341.mm.1 | NM_172944          | Itgae   | integrin alpha E, epithelial-associated         | 73090583  | 73147449  | TC1100001015.mm.1  | -0.1 | 0.153033 |
| TC0700003343.mm.1 | ENSMUST00000119389 | Gm14046 | predicted gene 14046                            | 129749901 | 129750409 | TC0200001962.mm.1  | -0.2 | 0.153087 |
| TC0700003347.mm.1 | ENSMUST00000082801 | Gm23057 | predicted gene, 23057                           | 72633447  | 72633553  | TC0900000975.mm.1  | -0.6 | 0.153231 |
| TC0700003365.mm.1 | ENSMUST00000122796 | Gm25290 | predicted gene, 25290                           | 92193322  | 92193465  | TC0500000869.mm.1  | -0.1 | 0.153389 |
| TC0700003366.mm.1 | NM_031392          | Wdr6    | WD repeat domain 6                              | 108572311 | 108578670 | TC0900003064.mm.1  | -0.2 | 0.153429 |
| TC0700003369.mm.1 | NM_178647          | Cggbp1  | CGG triplet repeat binding protein 1            | 64851996  | 64859507  | TC1600000790.mm.1  | -0.1 | 0.153496 |
| TC0700003377.mm.1 | ENSMUST00000106074 | Krtap5- | keratin associated protein 5-1                  | 142280268 | 142280939 | TC0700004562.mm.1  | -0.2 | 0.153561 |
| TC0700003412.mm.1 | NCBI_Gene:692182:p | Igkv9-1 | immunoglobulin kappa variable 9-129             | 67839793  | 67840266  | TC0600003509.mm.1  | -0.4 | 0.153565 |
| TC0700003413.mm.1 | NM_019771          | Dstn    | desprin                                         | 143915320 | 143943324 | TC0700002136.mm.1  | 0.2  | 0.153634 |
| TC0700003416.mm.1 | NM_134097          | Topors  | topoisomerase I binding, arginine/serine-rich   | 40259601  | 40269850  | TC0400002436.mm.1  | -0.1 | 0.153642 |
| TC0700003420.mm.1 | ENSMUST00000083407 | Gm25579 | predicted gene, 25579                           | 126567044 | 126567149 | TC0700004284.mm.1  | 0.2  | 0.153667 |
| TC0700003433.mm.1 | NM_025421          | Acpy1   | acylphosphatase 1, erythrocyte (common) type    | 85272398  | 85288438  | TC1200002092.mm.1  | -0.1 | 0.153681 |
| TC0700003435.mm.1 | NM_146055          | 2610301 | RIKEN cDNA 2610301G19 gene                      | 70138168  | 70153811  | TC1400002331.mm.1  | -0.2 | 0.153684 |
| TC0700003448.mm.1 | NM_010613          | Khsrp   | KH-type splicing regulatory protein             | 57021049  | 57031507  | TC0700002344.mm.1  | -0.3 | 0.153788 |
| TC0700003451.mm.1 | ENSMUST00000179807 | Gm24638 | predicted gene, 24638                           | 101392979 | 101393110 | TC0900002950.mm.1  | 0.2  | 0.153871 |
| TC0700003452.mm.1 | NM_001105060       | Vmn2r63 | vomeronasal 2, receptor 63                      | 42903251  | 42933789  | TC0700002938.mm.1  | 0.1  | 0.15388  |
| TC0700003453.mm.1 | NCBI_Gene:434039:p | Igkv6-3 | immunoglobulin kappa variable 6-32              | 70074024  | 70074584  | TC0600003585.mm.1  | -0.8 | 0.153901 |
| TC0700003464.mm.1 | NM_172631          | Ldlrad4 | low density lipoprotein receptor class A domain | 67933257  | 68255551  | TC1800000714.mm.1  | -0.2 | 0.153903 |
| TC0700003466.mm.1 | NM_013760          | Dnajb9  | Dnaj (Hsp40) homolog, subfamily B, member 9     | 44205895  | 44210068  | TC1200001685.mm.1  | 0.2  | 0.153986 |
| TC0700003469.mm.1 | XM_001476155       | Gm12508 | predicted gene 12508                            | 55254652  | 55255335  | TC0400000610.mm.1  | -0.4 | 0.154131 |
| TC0700003470.mm.1 | NM_026039          | Med18   | mediator of RNA polymerase II transcription, su | 132458729 | 132463921 | TC0400003672.mm.1  | -0.1 | 0.154168 |
| TC0700003473.mm.1 | NM_025536          | Comm5   | COMM domain containing 5                        | 76899910  | 76901305  | TC1500000613.mm.1  | -0.2 | 0.154223 |

|                   |                    |         |                                                 |           |           |                    |      |          |
|-------------------|--------------------|---------|-------------------------------------------------|-----------|-----------|--------------------|------|----------|
| TC0700003486.mm.1 | NM_025285          | Stmn2   | stathmin-like 2                                 | 8509527   | 8561606   | TC0300000043.mm.1  | 0.1  | 0.154337 |
| TC0700003487.mm.1 | NM_009085          | Polr1c  | polymerase (RNA) I polypeptide C                | 46243920  | 46248054  | TC1700002170.mm.1  | -0.1 | 0.154361 |
| TC0700003488.mm.1 | NM_009912          | Ccr1    | chemokine (C-C motif) receptor 1                | 123962126 | 123968692 | TC0900003313.mm.1  | 0.1  | 0.154594 |
| TC0700003521.mm.1 | ENSMUST00000122442 | Gm15335 | predicted gene 15335                            | 38717528  | 38718128  | TC1800001235.mm.1  | -0.1 | 0.154881 |
| TC0700003529.mm.1 | NM_213733          | Npepl1  | aminopeptidase-like 1                           | 174110349 | 174123070 | TC0200002698.mm.1  | 0.1  | 0.154944 |
| TC0700003530.mm.1 | NR_028515          | Snora78 | small nucleolar RNA, H/ACA box 7                | 24719676  | 24719832  | TC1700001641.mm.1  | -0.3 | 0.155093 |
| TC0700003536.mm.1 | ENSMUST00000158572 | Gm25767 | predicted gene, 25767                           | 36671658  | 36671781  | TC0500000413.mm.1  | 0.2  | 0.155124 |
| TC0700003538.mm.1 | NM_001003913       | Mars    | methionine-tRNA synthetase                      | 127296221 | 127311786 | TC1000003112.mm.1  | -0.1 | 0.155203 |
| TC0700003547.mm.1 | ENSMUST00000175383 | Gm24366 | predicted gene, 24366                           | 122471627 | 122471712 | TC0800003073.mm.1  | 0.5  | 0.155302 |
| TC0700003552.mm.1 | ENSMUST00000104307 | Gm23594 | predicted gene, 23594                           | 99943709  | 99943842  | TC0900001256.mm.1  | 0.1  | 0.155393 |
| TC0700003564.mm.1 | ENSMUST00000066794 | Gm8935  | predicted pseudogene 8935                       | 12855836  | 12858633  | TC0300000077.mm.1  | -0.2 | 0.155446 |
| TC0700003566.mm.1 | ENSMUST00000122635 | n-R5s15 | nuclear encoded rRNA 5S 15                      | 152304001 | 152304111 | TC0X00001544.mm.1  | 0.2  | 0.155533 |
| TC0700003567.mm.1 | ENSMUST00000120640 | Gm11792 | predicted gene 11792                            | 121092392 | 121092559 | TC1100004243.mm.1  | -0.2 | 0.155562 |
| TC0700003570.mm.1 | NM_008772          | P2ry1   | purinergic receptor P2Y, G-protein coupled 1    | 61002785  | 61008982  | TC0300000491.mm.1  | 0.1  | 0.155621 |
| TC0700003572.mm.1 | ENSMUST00000173594 | Gm18737 | predicted gene, 18737                           | 37860807  | 37861743  | TC1700000788.mm.1  | -0.1 | 0.155737 |
| TC0700003574.mm.1 | ENSMUST00000178731 | Gm22006 | predicted gene, 22006                           | 135384915 | 135385028 | TC0X00003009.mm.1  | -0.2 | 0.155776 |
| TC0700003575.mm.1 | ENSMUST00000178874 | Gm24416 | predicted gene, 24416                           | 135445519 | 135445632 | TC0X00003010.mm.1  | -0.2 | 0.155776 |
| TC0700003584.mm.1 | NM_026725          | Dusp23  | dual specificity phosphatase 23                 | 172630769 | 172632974 | TC0100003577.mm.1  | 0.2  | 0.155957 |
| TC0700003593.mm.1 | XR_104542          | D1Ert4  | DNA segment, Chr 1, ERATO Doi 448, expressed    | 34445790  | 34449348  | TC0100000223.mm.1  | -0.2 | 0.156001 |
| TC0700003604.mm.1 | NM_199027          | Zfp335  | zinc finger protein 335                         | 164891882 | 164911757 | TC02000005139.mm.1 | -0.1 | 0.156298 |
| TC0700003606.mm.1 | ENSMUST00000104114 | Gm22473 | predicted gene, 22473                           | 6634164   | 6634295   | TC0400002158.mm.1  | 0.1  | 0.156328 |
| TC0700003613.mm.1 | NM_028312          | Ccdc12  | coiled-coil domain containing 12                | 110656503 | 110711593 | TC0900001467.mm.1  | -0.1 | 0.156393 |
| TC0700003618.mm.1 | ENSMUST00000158960 | Gm23338 | predicted gene, 23338                           | 40458939  | 40459033  | TC0400002441.mm.1  | -0.1 | 0.1565   |
| TC0700003620.mm.1 | NM_001174078       | Smarca4 | SWI/SNF related, matrix associated, actin depen | 21616169  | 21704230  | TC0900000203.mm.1  | -0.3 | 0.156516 |
| TC0700003625.mm.1 | NM_009450          | Tubb2a  | tubulin, beta 2A class IIA                      | 34074278  | 34078008  | TC1300001779.mm.1  | -0.4 | 0.156552 |
| TC0700003653.mm.1 | ENSMUST00000104773 | Gm24604 | predicted gene, 24604                           | 24448064  | 24448158  | TC0200003113.mm.1  | 0.4  | 0.15657  |
| TC0700003658.mm.1 | NM_028288          | Cul4b   | cullin 4B                                       | 38531616  | 38576196  | TC0X00003425.mm.1  | -0.1 | 0.156635 |
| TC0700003660.mm.1 | NR_037297          | Mir3110 | microRNA 3110                                   | 38210441  | 38210520  | TC0X00000364.mm.1  | -0.1 | 0.156715 |
| TC0700003689.mm.1 | NM_001029872       | Itgad   | integrin, alpha D                               | 128154376 | 128223816 | TC0700001877.mm.1  | -0.1 | 0.15678  |
| TC0700003693.mm.1 | NM_133744          | Ccdc71  | coiled-coil domain containing 71                | 108460518 | 108465945 | TC0900001406.mm.1  | -0.1 | 0.156834 |
| TC0700003695.mm.1 | NM_172300          | Ube2z   | ubiquitin-conjugating enzyme E2Z (putative)     | 96047431  | 96065388  | TC1100003609.mm.1  | -0.1 | 0.157034 |
| TC0700003699.mm.1 | ENSMUST00000179794 | Gm25173 | predicted gene, 25173                           | 27700671  | 27700777  | TC0400000223.mm.1  | -0.7 | 0.157057 |
| TC0700003704.mm.1 | ENSMUST00000177553 | Gm25211 | predicted gene, 25211                           | 86916216  | 86916322  | TC0500002689.mm.1  | -0.7 | 0.157057 |
| TC0700003708.mm.1 | ENSMUST00000083073 | Gm26324 | predicted gene, 26324                           | 99856308  | 99856414  | TC1100001603.mm.1  | -0.7 | 0.157057 |
| TC0700003711.mm.1 | ENSMUST00000083751 | Gm23732 | predicted gene, 23732                           | 116173313 | 116173419 | TC1200001300.mm.1  | -0.7 | 0.157057 |
| TC0700003712.mm.1 | ENSMUST00000119733 | Gm13509 | predicted gene 13509                            | 49308155  | 49309462  | TC0200000797.mm.1  | -0.2 | 0.157102 |
| TC0700003714.mm.1 | NM_009045          | Rela    | v-rel reticuloendotheliosis viral oncogene homo | 5637483   | 5648130   | TC1900000078.mm.1  | 0.3  | 0.157254 |
| TC0700003721.mm.1 | NM_007421          | Adssl1  | adenylosuccinate synthetase like 1              | 112620045 | 112641358 | TC1200001262.mm.1  | -0.1 | 0.157261 |
| TC0700003730.mm.1 | NM_009812          | Casp8   | caspase 8                                       | 58795374  | 58847503  | TC0100000440.mm.1  | 0.4  | 0.157284 |
| TC0700003733.mm.1 | NM_019437          | Rfk     | riboflavin kinase                               | 17394043  | 17401349  | TC1900000317.mm.1  | 0.2  | 0.157536 |
| TC0700003737.mm.1 | NM_130456          | Nphs2   | nephrosis 2 homolog, podocin (human)            | 156310727 | 156328035 | TC0100001412.mm.1  | -0.1 | 0.157556 |
| TC0700003743.mm.1 | NM_001163266       | Lsm10   | U7 snRNP-specific Sm-like protein LSM10         | 126096623 | 126098584 | TC0400001452.mm.1  | 0.1  | 0.157556 |
| TC0700003746.mm.1 | ENSMUST00000083236 | Gm23730 | predicted gene, 23730                           | 70521598  | 70521704  | TC0900002597.mm.1  | -0.6 | 0.157767 |
| TC0700003747.mm.1 | ENSMUST00000082870 | Gm22622 | predicted gene, 22622                           | 59705746  | 59705874  | TC0600002388.mm.1  | -0.1 | 0.157862 |
| TC0700003751.mm.1 | ENSMUST00000157438 | Gm24477 | predicted gene, 24477                           | 166768745 | 166768847 | TC0200002573.mm.1  | 0.1  | 0.157884 |
| TC0700003761.mm.1 | NM_001159948       | Als2    | amyotrophic lateral sclerosis 2 (juvenile)      | 59162756  | 59237231  | TC0100003879.mm.1  | -0.1 | 0.158031 |
| TC0700003764.mm.1 | NM_023556          | Mvk     | mevalonate kinase                               | 114444269 | 114460591 | TC0500001225.mm.1  | 0.2  | 0.158039 |
| TC0700003790.mm.1 | ENSMUST00000082824 | Gm26331 | predicted gene, 26331                           | 89589435  | 89589541  | TC0800002672.mm.1  | -0.7 | 0.158113 |
| TC0700003797.mm.1 | NM_001162974       | Lrrc51  | leucine rich repeat containing 51               | 101912984 | 101933895 | TC0700003848.mm.1  | 0.1  | 0.158186 |
| TC0700003798.mm.1 | ENSMUST00000121000 | Gm13937 | predicted gene 13937                            | 110209178 | 110210165 | TC0200004307.mm.1  | 0.1  | 0.158361 |
| TC0700003799.mm.1 | ENSMUST00000167167 | Rpl17-p | ribosomal protein L17, pseudogene 5             | 22612591  | 22613217  | TC0500002039.mm.1  | -0.4 | 0.158383 |
| TC0700003804.mm.1 | NM_001024928       | Zfp667  | zinc finger protein 667                         | 6286579   | 6307883   | TC0700000075.mm.1  | -0.1 | 0.158495 |
| TC0700003806.mm.1 | NM_198024          | Ranbp3l | RAN binding protein 3-like                      | 8967949   | 9067333   | TC1500000062.mm.1  | 0.2  | 0.158581 |
| TC0700003807.mm.1 | NM_001252473       | Tjap1   | tight junction associated protein 1             | 46257851  | 46283026  | TC1700002171.mm.1  | -0.1 | 0.158591 |
| TC0700003815.mm.1 | NCBI_Gene:10004247 | Trav3d- | Trav3d-2 T cell receptor alpha variable 3D-2    | 52887587  | 52888808  | TC1400000639.mm.1  | -0.2 | 0.158672 |
| TC0700003818.mm.1 | NR_028522          | Snord13 | small nucleolar RNA, C/D box 13                 | 31149861  | 31149967  | TC0800001976.mm.1  | -0.7 | 0.158732 |
| TC0700003822.mm.1 | ENSMUST00000121199 | Gm12466 | predicted gene 12466                            | 52240903  | 52241522  | TC0400000565.mm.1  | -0.2 | 0.158902 |
| TC0700003825.mm.1 | ENSMUST00000077309 | Gm4953  | predicted pseudogene 4953                       | 159168157 | 159168642 | TC0100003342.mm.1  | -0.2 | 0.158945 |
| TC0700003826.mm.1 | NM_001033448       | Ap5b1   | adaptor-related protein complex 5, beta 1 subur | 5568025   | 5571261   | TC1900000075.mm.1  | -0.1 | 0.159113 |
| TC0700003827.mm.1 | ENSMUST00000179288 | Gm22821 | predicted gene, 22821                           | 109295542 | 109295648 | TC0900003081.mm.1  | -0.8 | 0.159165 |
| TC0700003831.mm.1 | ENSMUST00000178217 | Gm25484 | predicted gene, 25484                           | 109347524 | 109347630 | TC0900003083.mm.1  | -0.8 | 0.159165 |
| TC0700003840.mm.1 | ENSMUST00000178055 | Gm24641 | predicted gene, 24641                           | 109358229 | 109358335 | TC0900003084.mm.1  | -0.8 | 0.159165 |
| TC0700003842.mm.1 | ENSMUST00000117121 | Gm7785  | predicted gene 7785                             | 91296045  | 91296936  | TC0100000891.mm.1  | -0.2 | 0.159184 |
| TC0700003844.mm.1 | NM_145393          | Ythdf2  | YTH domain family 2                             | 132184912 | 132212303 | TC0400003659.mm.1  | -0.2 | 0.15922  |
| TC0700003845.mm.1 | ENSMUST00000104336 | n-R5s67 | nuclear encoded rRNA 5S 67                      | 6273311   | 6273424   | TC1100000092.mm.1  | 0.2  | 0.159223 |
| TC0700003848.mm.1 | NM_008279          | Map4k1  | mitogen-activated protein kinase kinase kinase  | 28982050  | 29003279  | TC0700000519.mm.1  | -0.4 | 0.159227 |
| TC0700003857.mm.1 | NR_028275          | Snord14 | small nucleolar RNA, C/D box 14E                | 0         | 0         | TSUnmapped0000017  | -0.9 | 0.159386 |
| TC0700003860.mm.1 | ENSMUST00000101968 | n-R5s2  | nuclear encoded rRNA 5S 2                       | 6106891   | 6107009   | TC0X00000046.mm.1  | -0.5 | 0.159388 |
| TC0700003861.mm.1 | XM_483949          | Gm5428  | predicted gene 5428                             | 111125851 | 111126780 | TC1000001285.mm.1  | -0.3 | 0.159398 |
| TC0700003862.mm.1 | NM_007922          | Elk1    | ELK1, member of ETS oncogene family             | 20933395  | 20950608  | TC0X00003419.mm.1  | 0.1  | 0.159507 |
| TC0700003865.mm.1 | BC058415           | Rnf220  | ring finger protein 220                         | 117271463 | 117497052 | TC0400003369.mm.1  | -0.1 | 0.159588 |
| TC0700003882.mm.1 | NM_175334          | Maml1   | mastermind like 1 (Drosophila)                  | 50255634  | 50292336  | TC1100002667.mm.1  | -0.1 | 0.159749 |
| TC0700003883.mm.1 | ENSMUST00000157896 | Gm26088 | predicted gene, 26088                           | 77676821  | 77676951  | TC1300000937.mm.1  | 0.2  | 0.159816 |
| TC0700003885.mm.1 | NCBI_Gene:667449:p | Trav6-1 | T cell receptor alpha variable 6-1              | 52638515  | 52638962  | TC1400000618.mm.1  | -0.1 | 0.159824 |
| TC0700003887.mm.1 | NM_008608          | Mmp14   | matrix metalloproteinase 14 (membrane-insertec  | 54431604  | 54441264  | TC1400000745.mm.1  | 0.3  | 0.159839 |
| TC0700003889.mm.1 | ENSMUST00000101833 | Gm24265 | predicted gene, 24265                           | 115489459 | 115489599 | TC0500001262.mm.1  | -0.6 | 0.159902 |
| TC0700003903.mm.1 | NM_029884          | Hgsnat  | heparan-alpha-glucosaminide N-acetyltransferas  | 25944459  | 25976744  | TC0800001925.mm.1  | 0.2  | 0.159945 |
| TC0700003904.mm.1 | NCBI_Gene:629863:p | Ighv1-1 | immunoglobulin heavy variable 1-14              | 114646572 | 114646865 | TC1200002608.mm.1  | -1.0 | 0.16041  |

|                   |                    |         |                                                 |           |           |                    |      |          |
|-------------------|--------------------|---------|-------------------------------------------------|-----------|-----------|--------------------|------|----------|
| TC0700003908.mm.1 | ENSMUST00000103850 | Mir669f | microRNA 669f                                   | 10467229  | 10467349  | TC0200000092.mm.1  | 0.2  | 0.160436 |
| TC0700003909.mm.1 | ENSMUST00000116715 | Gm25776 | predicted gene, 25776                           | 91573430  | 91573572  | TC1200002153.mm.1  | -0.4 | 0.160511 |
| TC0700003916.mm.1 | NM_007890          | Dyrk1a  | dual-specificity tyrosine-(Y)-phosphorylation r | 94570010  | 94695519  | TC1600001064.mm.1  | -0.2 | 0.160515 |
| TC0700003940.mm.1 | ENSMUST00000178688 | Gm23092 | predicted gene, 23092                           | 91217898  | 91218004  | TC0500002735.mm.1  | -0.7 | 0.160545 |
| TC0700003946.mm.1 | ENSMUST00000179440 | Gm24242 | predicted gene, 24242                           | 151700202 | 151700308 | TC0500003706.mm.1  | -0.7 | 0.160545 |
| TC0700003948.mm.1 | NM_026220          | Mfap1a  | microfibrillar-associated protein 1A            | 121491911 | 121506665 | TC0200004492.mm.1  | -0.3 | 0.160576 |
| TC0700003953.mm.1 | ENSMUST00000158574 | Gm25772 | predicted gene, 25772                           | 137325559 | 137325614 | TC0400001702.mm.1  | -0.7 | 0.16065  |
| TC0700003960.mm.1 | NR_028555          | Snord89 | small nucleolar RNA, C/D box 89                 | 39548745  | 39548854  | TC0100002238.mm.1  | -0.7 | 0.160935 |
| TC0700003972.mm.1 | NM_027748          | Taf3    | TAF3 RNA polymerase II, TATA box binding prote  | 9914552   | 10048609  | TC0200002937.mm.1  | -0.1 | 0.160939 |
| TC0700003978.mm.1 | NM_024248          | Cars2   | cysteinyl-tRNA synthetase 2 (mitochondrial)(put | 11514017  | 11550771  | TC0800001700.mm.1  | -0.1 | 0.16096  |
| TC0700003986.mm.1 | NM_009413          | Tpd52l1 | tumor protein D52-like 1                        | 31332380  | 31445921  | TC1000001955.mm.1  | -0.2 | 0.161096 |
| TC0700003989.mm.1 | ENSMUST00000054148 | Gm9790  | predicted gene 9790                             | 85915722  | 85916163  | TC0300000673.mm.1  | 0.3  | 0.161124 |
| TC0700003990.mm.1 | NM_173376          | Rbmx2   | RNA binding motif protein, X-linked 2           | 48695004  | 48710723  | TC0X00000439.mm.1  | -0.1 | 0.161278 |
| TC0700003993.mm.1 | ENSMUST00000178689 | Gm21767 | predicted gene, 21767                           | 13941738  | 13942280  | TC0Y00000036.mm.1  | 0.1  | 0.161296 |
| TC0700003999.mm.1 | ENSMUST00000179302 | Gm21822 | predicted gene, 21822                           | 18654482  | 18655024  | TC0Y00000051.mm.1  | 0.1  | 0.161296 |
| TC0700004002.mm.1 | ENSMUST00000107276 | Gm10972 | predicted gene 10972                            | 94643112  | 94643600  | TC0300000873.mm.1  | -0.2 | 0.161328 |
| TC0700004003.mm.1 | ENSMUST00000178491 | Gm26245 | predicted gene, 26245                           | 96617099  | 96617205  | TC0100000964.mm.1  | -0.5 | 0.16134  |
| TC0700004007.mm.1 | NM_201376          | Serpinb | serine (or cysteine) peptidase inhibitor, clade | 107078167 | 107083506 | TC0100002904.mm.1  | -0.1 | 0.161467 |
| TC0700004008.mm.1 | NM_025273          | Pcbd1   | pterin 4 alpha carbinolamine dehydratase/dimer  | 61089331  | 61094329  | TC1000000558.mm.1  | 0.5  | 0.161508 |
| TC0700004009.mm.1 | NM_028036          | Tmco6   | transmembrane and coiled-coil domains 6         | 36735068  | 36742395  | TC1800000342.mm.1  | -0.1 | 0.161515 |
| TC0700004015.mm.1 | ENSMUST00000122527 | Gm25781 | predicted gene, 25781                           | 120798853 | 120798936 | TC1400001312.mm.1  | -0.8 | 0.161579 |
| TC0700004018.mm.1 | ENSMUST00000175393 | Gm25996 | predicted gene, 25996                           | 43797417  | 43797533  | TC1600000645.mm.1  | 0.2  | 0.161854 |
| TC0700004035.mm.1 | NM_026490          | Mrpl19  | mitochondrial ribosomal protein L19             | 81957826  | 81965958  | TC0600002543.mm.1  | -0.1 | 0.161898 |
| TC0700004045.mm.1 | ENSMUST00000121555 | Rpl18-p | ribosomal protein L18, pseudogene 1             | 60900898  | 60901422  | TC0100000486.mm.1  | -0.5 | 0.161906 |
| TC0700004047.mm.1 | ENSMUST00000121172 | Gm11952 | predicted gene 11952                            | 3872955   | 3873775   | TC1100000024.mm.1  | -0.1 | 0.16192  |
| TC0700004048.mm.1 | NM_009938          | Copa    | coatamer protein complex subunit alpha          | 172082529 | 172122332 | TC0100001605.mm.1  | 0.2  | 0.162033 |
| TC0700004069.mm.1 | NM_027346          | Taco1   | translational activator of mitochondrially enco | 106066061 | 106073612 | TC1000001771.mm.1  | -0.1 | 0.162103 |
| TC0700004074.mm.1 | NM_027052          | Slc38a4 | solute carrier family 38, member 4              | 96994823  | 97055956  | TC1500002147.mm.1  | -0.1 | 0.162199 |
| TC0700004076.mm.1 | NM_001081349       | Slc43a1 | solute carrier family 43, member 1              | 84838850  | 84863594  | TC0200001224.mm.1  | -0.2 | 0.162212 |
| TC0700004078.mm.1 | NCBI_Gene:780885:p | Ighv1-2 | immunoglobulin heavy variable V1-24             | 114772928 | 114773221 | TC1200002616.mm.1  | -0.2 | 0.162241 |
| TC0700004080.mm.1 | XM_001479065       | Gm8526  | predicted gene 8526                             | 88467543  | 88479056  | TC1300000996.mm.1  | -0.3 | 0.162362 |
| TC0700004082.mm.1 | ENSMUST00000119381 | Gm14828 | predicted gene 14828                            | 100337514 | 100338668 | TC0X00000947.mm.1  | 0.1  | 0.162429 |
| TC0700004088.mm.1 | ENSMUST00000158489 | Gm25906 | predicted gene, 25906                           | 70123028  | 70123153  | TC0800002384.mm.1  | 0.1  | 0.162491 |
| TC0700004104.mm.1 | ENSMUST00000179177 | Gm26365 | predicted gene, 26365                           | 59693220  | 59693313  | TC0700003276.mm.1  | 0.1  | 0.162582 |
| TC0700004114.mm.1 | NM_010626          | Kif7    | kinesin family member 7                         | 79698098  | 79715720  | TC0700003566.mm.1  | -0.1 | 0.162729 |
| TC0700004116.mm.1 | NM_001081366       | Vps8    | vacuolar protein sorting 8 homolog (S. cerevisi | 21423123  | 21644487  | TC1600000301.mm.1  | 0.1  | 0.162784 |
| TC0700004119.mm.1 | NR_029547          | Mir133a | microRNA 133a-1                                 | 10782899  | 10782985  | TC1800000982.mm.1  | 0.1  | 0.163133 |
| TC0700004123.mm.1 | NM_026719          | Lmbrd1  | LMBR1 domain containing 1                       | 24678544  | 24766301  | TC0100000171.mm.1  | 0.2  | 0.163159 |
| TC0700004128.mm.1 | NM_001128634       | Tppp2   | tubulin polymerization-promoting protein family | 51918425  | 51920700  | TC1400000596.mm.1  | 0.2  | 0.163222 |
| TC0700004130.mm.1 | NR_004410          | Snord87 | small nucleolar RNA, C/D box 87                 | 9942463   | 9942549   | TC0100001948.mm.1  | -0.5 | 0.16347  |
| TC0700004132.mm.1 | NM_029092          | Trmt10c | tRNA methyltransferase 10C                      | 56032609  | 56037819  | TC1600001747.mm.1  | -0.1 | 0.163542 |
| TC0700004143.mm.1 | NM_153783          | Paox    | polyamine oxidase (exo-N4-amino)                | 140115899 | 140134334 | TC0700002002.mm.1  | 0.1  | 0.163666 |
| TC0700004144.mm.1 | NM_021409          | Pard6b  | par-6 (partitioning defective 6) homolog beta ( | 168081004 | 168101203 | TC0200002606.mm.1  | -0.1 | 0.163675 |
| TC0700004148.mm.1 | NM_023523          | Pecr    | peroxisomal trans-2-enoyl-CoA reductase         | 72259167  | 72284314  | TC0100002554.mm.1  | 0.3  | 0.163701 |
| TC0700004152.mm.1 | ENSMUST00000083234 | Gm25987 | predicted gene, 25987                           | 68671416  | 68671522  | TC1500000499.mm.1  | -0.5 | 0.163729 |
| TC0700004155.mm.1 | NM_178687          | Cd226   | CD226 antigen                                   | 89176969  | 89270327  | TC1800000909.mm.1  | -0.2 | 0.163735 |
| TC0700004156.mm.1 | NM_023637          | Sars2   | seryl-aminoacyl-tRNA synthetase 2               | 28741968  | 28753879  | TC0700000509.mm.1  | -0.1 | 0.163737 |
| TC0700004160.mm.1 | ENSMUST00000117207 | Itpa-ps | inosine triphosphatase (nucleoside triphosphate | 94384502  | 94385098  | TC02000004179.mm.1 | -0.2 | 0.163805 |
| TC0700004163.mm.1 | ENSMUST00000083111 | Gm24046 | predicted gene, 24046                           | 89967999  | 89968163  | TC0300002359.mm.1  | -0.4 | 0.163808 |
| TC0700004165.mm.1 | ENSMUST00000083792 | Gm26163 | predicted gene, 26163                           | 30052379  | 30052556  | TC1500001316.mm.1  | -0.2 | 0.163855 |
| TC0700004176.mm.1 | ENSMUST00000178139 | Gm25245 | predicted gene, 25245                           | 91921309  | 91921415  | TC1600002086.mm.1  | -0.7 | 0.16388  |
| TC0700004179.mm.1 | NM_134090          | Kdelr3  | KDEL (Lys-Asp-Glu-Leu) endoplasmic reticulum p  | 79516408  | 79527739  | TC1500000676.mm.1  | 0.1  | 0.164084 |
| TC0700004181.mm.1 | NM_018771          | Gipc1   | GIPC PDZ domain containing family, member 1     | 83652678  | 83664789  | TC0800000930.mm.1  | -0.1 | 0.164132 |
| TC0700004182.mm.1 | NM_175143          | Qrich1  | glutamine-rich 1                                | 108517087 | 108560167 | TC0900001411.mm.1  | -0.2 | 0.164266 |
| TC0700004188.mm.1 | NCBI_Gene:384417:p | Igkv5-3 | immunoglobulin kappa variable 5-37              | 69963312  | 69963861  | TC0600003582.mm.1  | -0.2 | 0.164318 |
| TC0700004201.mm.1 | ENSMUST00000119858 | Gm6829  | predicted pseudogene 6829                       | 9327749   | 9328108   | TC0X00001827.mm.1  | -0.1 | 0.164388 |
| TC0700004202.mm.1 | NM_030100          | Wibg    | within bgcn homolog (Drosophila)                | 128747879 | 128766568 | TC1000001620.mm.1  | -0.2 | 0.1644   |
| TC0700004203.mm.1 | ENSMUST00000103358 | Igkv4-5 | immunoglobulin kappa chain variable 4-56        | 69587295  | 69587580  | TC0600002442.mm.1  | -0.5 | 0.1644   |
| TC0700004205.mm.1 | ENSMUST00000178754 | Gm22243 | predicted gene, 22243                           | 115411234 | 115411353 | TC0900003188.mm.1  | 0.3  | 0.164552 |
| TC0700004207.mm.1 | NM_144509          | Arl6ip4 | ADP-ribosylation factor-like 6 interacting prot | 124116089 | 124118196 | TC0500001437.mm.1  | -0.2 | 0.164561 |
| TC0700004219.mm.1 | NM_001039084       | Mrpl1   | mitochondrial ribosomal protein L1              | 96209493  | 96266727  | TC0500000925.mm.1  | -0.1 | 0.164595 |
| TC0700004220.mm.1 | NM_026401          | Mrp63   | mitochondrial ribosomal protein 63              | 57826239  | 57828745  | TC1400000827.mm.1  | -0.1 | 0.164624 |
| TC0700004233.mm.1 | NM_016720          | Neu3    | neuraminidase 3                                 | 99811439  | 99828417  | TC0700003806.mm.1  | -0.2 | 0.164705 |
| TC0700004252.mm.1 | ENSMUST00000083406 | Gm25578 | predicted gene, 25578                           | 124490856 | 124490959 | TC0100001107.mm.1  | -0.2 | 0.164815 |
| TC0700004258.mm.1 | ENSMUST00000130905 | Gm6689  | predicted gene 6689                             | 21091366  | 21091846  | TC0800000216.mm.1  | -0.3 | 0.16486  |
| TC0700004261.mm.1 | NM_178050          | Atl2    | atlastin GTPase 2                               | 79848390  | 79896123  | TC1700002573.mm.1  | -0.4 | 0.165024 |
| TC0700004269.mm.1 | ENSMUST00000082784 | Gm25929 | predicted gene, 25929                           | 61334761  | 61334867  | TC1100000778.mm.1  | -0.5 | 0.165062 |
| TC0700004273.mm.1 | ENSMUST00000179713 | Gm23712 | predicted gene, 23712                           | 72418713  | 72418819  | TC0500002571.mm.1  | -0.6 | 0.165072 |
| TC0700004276.mm.1 | NM_025390          | Pop4    | processing of precursor 4, ribonuclease P/MRP f | 38262816  | 38271369  | TC0700002880.mm.1  | -0.4 | 0.165098 |
| TC0700004277.mm.1 | ENSMUST00000120438 | Gm15368 | predicted gene 15368                            | 88186662  | 88187519  | TC0100000843.mm.1  | 0.1  | 0.165176 |
| TC0700004281.mm.1 | NM_0011111304      | Tbc1d9  | TBC1 domain family, member 9                    | 83165352  | 83272940  | TC0800000916.mm.1  | -0.1 | 0.165262 |
| TC0700004282.mm.1 | NM_001040686       | Zfp692  | zinc finger protein 692                         | 58307069  | 58314627  | TC1100000686.mm.1  | -0.1 | 0.165393 |
| TC0700004283.mm.1 | ENSMUST00000083739 | Gm24258 | predicted gene, 24258                           | 66970452  | 66970584  | TC1400000953.mm.1  | 0.1  | 0.165421 |
| TC0700004284.mm.1 | ENSMUST00000175540 | Gm22565 | predicted gene, 22565                           | 5705427   | 5705495   | TC0800000046.mm.1  | 0.2  | 0.1657   |
| TC0700004291.mm.1 | XR_140551          | Gm14399 | predicted gene 14399                            | 175129099 | 175142012 | TC0200005331.mm.1  | 0.5  | 0.165738 |
| TC0700004293.mm.1 | ENSMUST00000180129 | Gm23805 | predicted gene, 23805                           | 175904545 | 175904651 | TC0100001657.mm.1  | -0.6 | 0.165777 |
| TC0700004295.mm.1 | NM_025431          | Ilph    | LLP homolog, long-term synaptic facilitation (A | 120227060 | 120232582 | TC1000001480.mm.1  | -0.1 | 0.165816 |
| TC0700004296.mm.1 | ENSMUST00000083788 | Gm26166 | predicted gene, 26166                           | 58290251  | 58290357  | TC0300002041.mm.1  | -0.3 | 0.165831 |

|                   |                    |         |                                                 |           |           |                    |      |          |
|-------------------|--------------------|---------|-------------------------------------------------|-----------|-----------|--------------------|------|----------|
| TC0700004300.mm.1 | ENSMUST00000181006 | Gm26875 | predicted gene, 26875                           | 67699082  | 67700031  | TC1300000827.mm.1  | -0.1 | 0.165946 |
| TC0700004305.mm.1 | ENSMUST00000178643 | Gm22260 | predicted gene, 22260                           | 25279445  | 25279551  | TC0100002083.mm.1  | -0.6 | 0.166095 |
| TC0700004309.mm.1 | ENSMUST00000105311 | Gm6712  | predicted gene 6712                             | 17294443  | 17319511  | TC1700000200.mm.1  | -0.3 | 0.166165 |
| TC0700004310.mm.1 | ENSMUST00000068987 | Fam136b | family with sequence similarity 136, member B,  | 31276491  | 31276907  | TC1500000201.mm.1  | -0.2 | 0.166289 |
| TC0700004315.mm.1 | BC056433           | Shpk    | sedoheptulokinase                               | 73199460  | 73224511  | TC1100001018.mm.1  | 0.1  | 0.166403 |
| TC0700004318.mm.1 | NM_001173459       | LOC1000 | signal-regulatory protein beta 1-like           | 15795145  | 15848528  | TC03000003225.mm.1 | 0.2  | 0.166435 |
| TC0700004320.mm.1 | ENSMUST00000082775 | Gm22509 | predicted gene, 22509                           | 76274344  | 76274450  | TC0800002490.mm.1  | -0.2 | 0.16645  |
| TC0700004321.mm.1 | XR_141226          | Gm19422 | predicted gene, 19422                           | 101467121 | 101469892 | TC1400002622.mm.1  | -0.2 | 0.166458 |
| TC0700004323.mm.1 | ENSMUST00000157513 | Gm22894 | predicted gene, 22894                           | 102373118 | 102373220 | TC0900001287.mm.1  | 0.1  | 0.16651  |
| TC0700004324.mm.1 | NM_008044          | Fxn     | frataxin                                        | 24261453  | 24280605  | TC1900001276.mm.1  | -0.1 | 0.166514 |
| TC0700004326.mm.1 | NM_177717          | 4732456 | RIKEN cDNA 4732456N10 gene                      | 101552356 | 101562950 | TC1500002263.mm.1  | -0.2 | 0.166568 |
| TC0700004332.mm.1 | ENSMUST00000119105 | Gm12263 | predicted gene 12263                            | 59474284  | 59475765  | TC1100002853.mm.1  | -0.1 | 0.166763 |
| TC0700004346.mm.1 | ENSMUST00000117547 | Gm13803 | predicted gene 13803                            | 97949191  | 97949679  | TC1000004194.mm.1  | -0.3 | 0.166784 |
| TC0700004351.mm.1 | NM_018879          | Nprl2   | nitrogen permease regulator-like 2              | 107542209 | 107545706 | TC0900001371.mm.1  | -0.1 | 0.166809 |
| TC0700004353.mm.1 | ENSMUST00000175313 | Gm24811 | predicted gene, 24811                           | 117848553 | 117848652 | TC0300002823.mm.1  | 0.4  | 0.167012 |
| TC0700004354.mm.1 | NM_010478          | Hspa1b  | heat shock protein 1B                           | 34956429  | 34959422  | TC1700001935.mm.1  | -0.1 | 0.167206 |
| TC0700004358.mm.1 | NM_019932          | Pf4     | platelet factor 4                               | 90772435  | 90773383  | TC0500000843.mm.1  | 0.4  | 0.16721  |
| TC0700004360.mm.1 | NR_046144          | n-R5s13 | nuclear encoded rRNA 5S 136                     | 0         | 0         | TSUnmapped0000013  | -0.6 | 0.167227 |
| TC0700004363.mm.1 | NM_029600          | Abcc3   | ATP-binding cassette, sub-family C (CFTR/MRP),  | 94343295  | 94392997  | TC1100003561.mm.1  | 0.1  | 0.167315 |
| TC0700004367.mm.1 | NM_033616          | Csprs   | component of Sp100-rs                           | 111558    | 163011    | TC1_GL456221_rand  | 0.2  | 0.167522 |
| TC0700004370.mm.1 | NM_022418          | Tmub1   | transmembrane and ubiquitin-like domain conta   | 24445458  | 24447854  | TC0500002079.mm.1  | -0.1 | 0.1676   |
| TC0700004372.mm.1 | NM_008787          | Pcnt    | pericentrin (kendrin)                           | 76351254  | 76442912  | TC1000002400.mm.1  | -0.1 | 0.167672 |
| TC0700004382.mm.1 | NM_028617          | Mvb12a  | multivesicular body subunit 12A                 | 71542930  | 71548026  | TC0800000795.mm.1  | -0.1 | 0.167684 |
| TC0700004384.mm.1 | NM_175383          | B3gnt1  | UDP-GlcNAc:betaGal beta-1,3-N-acetylglucosam    | 5038826   | 5049917   | TC1900000052.mm.1  | -0.1 | 0.167705 |
| TC0700004392.mm.1 | NM_011929          | Clcn6   | chloride channel 6                              | 148004259 | 148038821 | TC0400004009.mm.1  | 0.1  | 0.167788 |
| TC0700004397.mm.1 | NM_030165          | Csgalna | chondroitin sulfate N-acetylglactosaminyltrans  | 118107452 | 118139140 | TC0600002994.mm.1  | 0.1  | 0.168029 |
| TC0700004399.mm.1 | NM_138684          | Wfdc12  | WAP four-disulfide core domain 12               | 164189231 | 164190608 | TC0200005106.mm.1  | -0.2 | 0.168052 |
| TC0700004401.mm.1 | ENSMUST00000083367 | Gm23248 | predicted gene, 23248                           | 65900201  | 65900308  | TC0900000856.mm.1  | -0.4 | 0.168252 |
| TC0700004403.mm.1 | NM_016798          | Pdlim3  | PDZ and LIM domain 3                            | 45885485  | 45919548  | TC0800000521.mm.1  | 0.1  | 0.168268 |
| TC0700004409.mm.1 | NM_008410          | Itm2b   | integral membrane protein 2B                    | 73362231  | 73385280  | TC1400002392.mm.1  | 0.3  | 0.168307 |
| TC0700004428.mm.1 | ENSMUST00000085262 | Gm10163 | predicted pseudogene 10163                      | 88390807  | 88391351  | TC0900001129.mm.1  | -0.4 | 0.168356 |
| TC0700004430.mm.1 | ENSMUST00000158972 | Gm24976 | predicted gene, 24976                           | 29459194  | 29459328  | TC0200000505.mm.1  | 0.1  | 0.16838  |
| TC0700004433.mm.1 | ENSMUST00000085379 | Rpl26-p | ribosomal protein L26, pseudogene 2             | 57632578  | 57633015  | TC1200001806.mm.1  | -0.1 | 0.168515 |
| TC0700004445.mm.1 | NM_146126          | Sord    | sorbitol dehydrogenase                          | 122234749 | 122265340 | TC0200001843.mm.1  | 0.4  | 0.168554 |
| TC0700004449.mm.1 | NM_139001          | Cspg4   | chondroitin sulfate proteoglycan 4              | 56865104  | 56899870  | TC0900000686.mm.1  | 0.1  | 0.168563 |
| TC0700004469.mm.1 | ENSMUST00000185045 | 5S_rRNA | 5S ribosomal RNA                                | 76619155  | 76619282  | TC0800002493.mm.1  | 0.1  | 0.168635 |
| TC0700004473.mm.1 | NM_178757          | lrf2bp1 | interferon regulatory factor 2 binding protein  | 19004065  | 19006763  | TC0700000281.mm.1  | -0.1 | 0.168864 |
| TC0700004481.mm.1 | ENSMUST00000179211 | AC13310 | N/A                                             | 30483     | 32396     | TC1_GL456211_rand  | -0.6 | 0.168894 |
| TC0700004484.mm.1 | NM_001085383       | Anxa9   | annexin A9                                      | 95296093  | 95307176  | TC0300002473.mm.1  | 0.1  | 0.168932 |
| TC0700004489.mm.1 | NM_001145881       | Zfp212  | Zinc finger protein 212                         | 47920476  | 47932639  | TC0600000542.mm.1  | -0.1 | 0.168974 |
| TC0700004496.mm.1 | NM_007702          | Cidea   | cell death-inducing DNA fragmentation factor, a | 67343564  | 67367794  | TC1800000702.mm.1  | -0.3 | 0.168996 |
| TC0700004508.mm.1 | NM_011783          | Agr2    | anterior gradient 2 (Xenopus laevis)            | 35992907  | 36004087  | TC1200000316.mm.1  | -0.2 | 0.168998 |
| TC0700004510.mm.1 | ENSMUST00000184547 | AC13286 | N/A                                             | 162674158 | 162674220 | TC0100003398.mm.1  | -0.3 | 0.169012 |
| TC0700004513.mm.1 | ENSMUST00000108959 | Gm14412 | predicted gene 14412                            | 177314520 | 177324307 | TC0200005364.mm.1  | 0.4  | 0.169131 |
| TC0700004515.mm.1 | NM_028173          | Tram1   | translocating chain-associating membrane prote  | 13564702  | 13589864  | TC0100001978.mm.1  | -0.3 | 0.169163 |
| TC0700004519.mm.1 | XM_003688779       | Gm14419 | predicted gene 14419                            | 177000951 | 177035267 | TC0200005491.mm.1  | 0.4  | 0.169172 |
| TC0700004524.mm.1 | NM_172738          | Zfp954  | zinc finger protein 954                         | 7114683   | 7121476   | TC0700002221.mm.1  | -0.1 | 0.16936  |
| TC0700004525.mm.1 | ENSMUST00000117000 | Gm22048 | predicted gene, 22048                           | 81735918  | 81736011  | TC0500000772.mm.1  | 0.3  | 0.169444 |
| TC0700004531.mm.1 | NM_173751          | Ilvbl   | ilvB (bacterial acetolactate synthase)-like     | 78574500  | 78584502  | TC1000000789.mm.1  | -0.1 | 0.169451 |
| TC0700004535.mm.1 | NM_019993          | Aldh9a1 | aldehyde dehydrogenase 9, subfamily A1          | 167349991 | 167368530 | TC0100001550.mm.1  | 0.2  | 0.169468 |
| TC0700004542.mm.1 | ENSMUST00000179244 | Gm26263 | predicted gene, 22623                           | 30493942  | 30494048  | TC1000000275.mm.1  | -0.8 | 0.169609 |
| TC0700004548.mm.1 | ENSMUST00000157702 | Gm25666 | predicted gene, 25666                           | 30514578  | 30514684  | TC0500002159.mm.1  | 0.1  | 0.169688 |
| TC0700004556.mm.1 | ENSMUST00000179110 | Gm25354 | predicted gene, 25354                           | 15593231  | 15593335  | TC0700000208.mm.1  | 0.2  | 0.169878 |
| TC0700004557.mm.1 | NM_027328          | Prpf31  | PRP31 pre-mRNA processing factor 31 homolog     | 3629985   | 3642486   | TC0700000015.mm.1  | -0.2 | 0.169919 |
| TC0700004560.mm.1 | ENSMUST00000120855 | Gm15190 | predicted gene 15190                            | 159584783 | 159585058 | TC0X00003267.mm.1  | -0.6 | 0.169944 |
| TC0700004561.mm.1 | NM_008933          | Prm2    | protamine 2                                     | 10791380  | 10792105  | TC1600001201.mm.1  | 0.5  | 0.170106 |
| TC0700004562.mm.1 | NM_010260          | Gbp2    | guanylate binding protein 2                     | 142620602 | 142638008 | TC0300001447.mm.1  | 0.3  | 0.170398 |
| TC0700004563.mm.1 | ENSMUST00000158530 | Gm23582 | predicted gene, 23582                           | 21249422  | 21249560  | TC1100002322.mm.1  | -0.1 | 0.170687 |
| TC0700004572.mm.1 | ENSMUST00000158199 | Gm25222 | predicted gene, 25222                           | 64894471  | 64894596  | TC0300002091.mm.1  | 0.2  | 0.170747 |
| TC0700004574.mm.1 | ENSMUST00000121734 | Gm12770 | predicted gene 12770                            | 33567253  | 33567714  | TC07000002813.mm.1 | -0.1 | 0.170966 |
| TC0700004585.mm.1 | NM_025358          | Ndufa9  | NADH dehydrogenase (ubiquinone) 1 alpha subc    | 126821863 | 126849144 | TC0600003165.mm.1  | 0.3  | 0.17108  |
| TC0700004586.mm.1 | NR_030484          | Mir703  | microRNA 703                                    | 98475556  | 98475664  | TC0500002812.mm.1  | -0.5 | 0.17109  |
| TC0700004588.mm.1 | ENSMUST00000143807 | Cep110  | centrosomal protein 110                         | 35109492  | 35178822  | TC0200000634.mm.1  | -0.3 | 0.171195 |
| TC0700004591.mm.1 | NR_035474          | Mir669m | microRNA 669m-1                                 | 10512790  | 10512887  | TC0200000194.mm.1  | 0.2  | 0.171356 |
| TC0700004593.mm.1 | ENSMUST00000116734 | Gm22105 | predicted gene, 22105                           | 39749317  | 39749432  | TC1000000333.mm.1  | -0.2 | 0.171417 |
| TC0700004595.mm.1 | NM_020006          | Cdc42ep | CDC42 effector protein (Rho GTPase binding) 4   | 113726850 | 113751881 | TC1100004039.mm.1  | 0.1  | 0.171431 |
| TC0700004596.mm.1 | NM_025324          | Zfp524  | zinc finger protein 524                         | 5015501   | 5018488   | TC0700000051.mm.1  | -0.1 | 0.171438 |
| TC0700004601.mm.1 | ENSMUST00000083232 | Gm24018 | predicted gene, 24018                           | 17809591  | 17809697  | TC1300001507.mm.1  | -0.8 | 0.171578 |
| TC0700004607.mm.1 | ENSMUST00000177960 | Gm23568 | predicted gene, 23568                           | 21456090  | 21456181  | TC0800001845.mm.1  | 0.2  | 0.171708 |
| TC0700004610.mm.1 | ENSMUST00000179245 | Gm24829 | predicted gene, 24829                           | 21594038  | 21594129  | TC0800001849.mm.1  | 0.2  | 0.171708 |
| TC0700004620.mm.1 | NR_030469          | Mir669b | microRNA 669b                                   | 10467790  | 10467886  | TC0200000094.mm.1  | 0.2  | 0.171759 |
| TC0700004621.mm.1 | ENSMUST00000158762 | Gm24679 | predicted gene, 24679                           | 66549935  | 66550045  | TC1800001483.mm.1  | 0.3  | 0.171797 |
| TC0700004622.mm.1 | NM_027201          | Zfp511  | zinc finger protein 511                         | 140036391 | 140040605 | TC0700002000.mm.1  | -0.2 | 0.171826 |
| TC0700004623.mm.1 | ENSMUST00000181162 | Gm7389  | predicted gene 7389                             | 3994628   | 3997505   | TC0800000025.mm.1  | -0.1 | 0.171827 |
| TC0700004624.mm.1 | ENSMUST00000050717 | Gm5422  | predicted pseudogene 5422                       | 31248140  | 31251045  | TC1000000278.mm.1  | -0.2 | 0.17183  |
| TC0700004629.mm.1 | ENSMUST00000175410 | Gm23617 | predicted gene, 23617                           | 67631825  | 67631919  | TC0500002529.mm.1  | 0.3  | 0.171851 |
| TC0700004630.mm.1 | ENSMUST00000178232 | Ppp1r2- | protein phosphatase 1, regulatory (inhibitor) s | 6324022   | 6324642   | TC1700001382.mm.1  | 0.2  | 0.171877 |
| TC0700004631.mm.1 | NM_172564          | Tns4    | tensin 4                                        | 99065678  | 99089306  | TC1100003694.mm.1  | -0.1 | 0.171961 |

|                   |                    |         |                                                 |           |           |                   |      |          |
|-------------------|--------------------|---------|-------------------------------------------------|-----------|-----------|-------------------|------|----------|
| TC0700004632.mm.1 | NM_178380          | Dhx38   | DEAH (Asp-Glu-Ala-His) box polypeptide 38       | 109548011 | 109565601 | TC0800002904.mm.1 | -0.1 | 0.172015 |
| TC0700004633.mm.1 | NM_172142          | Nfkbid  | nuclear factor of kappa light polypeptide gene  | 30421732  | 30428746  | TC0700000562.mm.1 | -0.2 | 0.172108 |
| TC0700004634.mm.1 | ENSMUST00000160554 | Gm15662 | predicted gene 15662                            | 105238134 | 105238292 | TC1000001252.mm.1 | 0.3  | 0.172162 |
| TC0700004635.mm.1 | ENSMUST00000118151 | Gm12799 | predicted gene 12799                            | 102046568 | 102049127 | TC0400003164.mm.1 | -0.1 | 0.17219  |
| TC0700004642.mm.1 | NM_133705          | Pycr2   | pyrroline-5-carboxylate reductase family, memb  | 180904274 | 180908088 | TC0100001722.mm.1 | -0.1 | 0.172194 |
| TC0700004648.mm.1 | ENSMUST00000104234 | Gm24281 | predicted gene, 24281                           | 157430604 | 157430739 | TC0X00001595.mm.1 | 0.2  | 0.172396 |
| TC0700004652.mm.1 | NM_008492          | Ldhb    | lactate dehydrogenase B                         | 142490249 | 142507957 | TC0600003375.mm.1 | -0.4 | 0.172425 |
| TC0700004660.mm.1 | ENSMUST00000178659 | Gm23610 | predicted gene, 23610                           | 46900801  | 46900907  | TC1800000489.mm.1 | -0.6 | 0.172612 |
| TC0700004662.mm.1 | NM_027206          | Tnfaip8 | tumor necrosis factor, alpha-induced protein 8- | 95139521  | 95142360  | TC0300002467.mm.1 | -0.3 | 0.172684 |
| TC0700004663.mm.1 | NM_001114663       | Plcl1   | phospholipase C-like 1                          | 55405946  | 55754285  | TC0100000404.mm.1 | -0.1 | 0.172719 |
| TC0700004665.mm.1 | ENSMUST00000083078 | Gm23507 | predicted gene, 23507                           | 88905121  | 88905227  | TC1100001383.mm.1 | -0.8 | 0.172877 |
| TC0800000001.mm.1 | NM_029231          | Pelp1   | proline, glutamic acid and leucine rich protein | 70392881  | 70410031  | TC1100003095.mm.1 | 0.1  | 0.172899 |
| TC0800000009.mm.1 | ENSMUST00000156603 | Gm15930 | predicted gene 15930                            | 3756905   | 3764030   | TC0700002138.mm.1 | 0.2  | 0.172927 |
| TC0800000011.mm.1 | ENSMUST00000158310 | Gm25924 | predicted gene, 25924                           | 121024360 | 121024462 | TC0700004203.mm.1 | 0.1  | 0.172945 |
| TC0800000019.mm.1 | XM_003688781       | LOC1008 | ubiquitin-conjugating enzyme E2 L3-like         | 74242264  | 74257336  | TC0300002161.mm.1 | -0.3 | 0.173041 |
| TC0800000022.mm.1 | NM_001081185       | Flnc    | filamin C, gamma                                | 29433153  | 29461888  | TC0600000232.mm.1 | 0.1  | 0.173055 |
| TC0800000024.mm.1 | ENSMUST00000158649 | Gm24547 | predicted gene, 24547                           | 122510549 | 122510697 | TC0100001101.mm.1 | 0.2  | 0.173142 |
| TC0800000025.mm.1 | NM_177708          | Rtn4r1  | reticulon 4 receptor-like 1                     | 75193783  | 75267769  | TC1100001063.mm.1 | 0.1  | 0.173233 |
| TC0800000026.mm.1 | NM_027715          | Otud1   | OTU domain containing 1                         | 19657752  | 19660590  | TC0200000316.mm.1 | -0.1 | 0.17326  |
| TC0800000027.mm.1 | XM_003688827       | Gm21135 | predicted gene, 21135                           | 32622259  | 32622699  | TC0700000602.mm.1 | -0.1 | 0.17331  |
| TC0800000032.mm.1 | NM_001161419       | Atp5g1  | ATP synthase, H+ transporting, mitochondrial FO | 96068852  | 96075694  | TC1100003610.mm.1 | -0.1 | 0.173331 |
| TC0800000039.mm.1 | NM_027134          | Mtfmt   | mitochondrial methionyl-tRNA formyltransferase  | 65453782  | 65453054  | TC0900000844.mm.1 | -0.1 | 0.173332 |
| TC0800000043.mm.1 | ENSMUST00000102332 | Gm24273 | predicted gene, 24273                           | 131498639 | 131498802 | TC0100003062.mm.1 | 0.1  | 0.173443 |
| TC0800000045.mm.1 | ENSMUST00000179578 | Gm24390 | predicted gene, 24390                           | 72490958  | 72491019  | TC1500001680.mm.1 | -0.2 | 0.173466 |
| TC0800000046.mm.1 | NM_178245          | Bsx     | brain specific homeobox                         | 40874127  | 40877972  | TC0900000461.mm.1 | -0.1 | 0.173519 |
| TC0800000051.mm.1 | ENSMUST00000157194 | Gm25117 | predicted gene, 25117                           | 111481493 | 111481636 | TC1000001299.mm.1 | -0.3 | 0.173546 |
| TC0800000064.mm.1 | XR_140429          | Gm10567 | predicted gene 10567                            | 9967163   | 9967932   | TC0100001949.mm.1 | 0.1  | 0.173554 |
| TC0800000072.mm.1 | ENSMUST00000179333 | Ppp1r2- | protein phosphatase 1, regulatory (inhibitor) s | 6253903   | 6254523   | TC1700000053.mm.1 | 0.2  | 0.173753 |
| TC0800000091.mm.1 | ENSMUST00000119271 | Gm15285 | predicted gene 15285                            | 111361203 | 111361675 | TC1300002658.mm.1 | 0.3  | 0.173773 |
| TC0800000109.mm.1 | ENSMUST00000083209 | Gm25644 | predicted gene, 25644                           | 51239690  | 51239796  | TC1900001660.mm.1 | -0.2 | 0.173795 |
| TC0800000123.mm.1 | NM_009077          | Arhgap6 | Rho GTPase activating protein 6                 | 168795099 | 169304440 | TC0X00001700.mm.1 | 0.1  | 0.17382  |
| TC0800000124.mm.1 | ENSMUST00000082898 | n-R5s16 | nuclear encoded rRNA 5S 166                     | 132564972 | 132565092 | TC0600001556.mm.1 | 0.3  | 0.173853 |
| TC0800000126.mm.1 | NR_028526          | Snord49 | small nucleolar RNA, C/D box 49B                | 62603079  | 62603150  | TC1100000804.mm.1 | -0.7 | 0.173889 |
| TC0800000128.mm.1 | NM_011835          | Katna1  | katanin p60 (ATPase-containing) subunit A1      | 7726000   | 7763150   | TC1000000050.mm.1 | -0.1 | 0.174022 |
| TC0800000130.mm.1 | NM_028230          | Shmt2   | serine hydroxymethyltransferase 2 (mitochondri  | 127517123 | 127522444 | TC1000003117.mm.1 | -0.2 | 0.174028 |
| TC0800000132.mm.1 | NR_037277          | Mir3094 | microRNA 3094                                   | 40993695  | 40993758  | TC0400000355.mm.1 | 0.1  | 0.174156 |
| TC0800000135.mm.1 | ENSMUST00000121016 | Gm5898  | predicted gene 5898                             | 63542479  | 63544549  | TC0700000967.mm.1 | -0.4 | 0.174175 |
| TC0800000137.mm.1 | NM_019953          | Cnpy2   | canopy 2 homolog (zebrafish)                    | 128322459 | 128327187 | TC1000001598.mm.1 | -0.2 | 0.174199 |
| TC0800000142.mm.1 | ENSMUST00000120513 | Gm15842 | predicted gene 15842                            | 122302422 | 122303039 | TC0500001388.mm.1 | -0.2 | 0.174354 |
| TC0800000157.mm.1 | ENSMUST00000082963 | Gm22504 | predicted gene, 22504                           | 105642338 | 105642476 | TC0700003986.mm.1 | -0.1 | 0.174388 |
| TC0800000158.mm.1 | NM_024182          | RioK3   | RIO kinase 3                                    | 12128812  | 12157367  | TC1800000098.mm.1 | 0.2  | 0.174615 |
| TC0800000164.mm.1 | ENSMUST00000104678 | Gm23914 | predicted gene, 23914                           | 46255928  | 46256019  | TC1800000476.mm.1 | 0.4  | 0.174631 |
| TC0800000176.mm.1 | ENSMUST00000085735 | Pgk1    | phosphoglycerate kinase 1                       | 10898566  | 10900296  | TC1200001415.mm.1 | -0.3 | 0.174689 |
| TC0800000179.mm.1 | NM_026445          | Sumf2   | sulfatase modifying factor 2                    | 129846990 | 129864050 | TC0500001514.mm.1 | 0.1  | 0.174792 |
| TC0800000180.mm.1 | OTTMUST00000071811 | RP23-73 | ---                                             | 29308138  | 29308620  | TC1700000501.mm.1 | -0.4 | 0.174818 |
| TC0800000182.mm.1 | NM_178670          | 8030462 | RIKEN cDNA 8030462N17 gene                      | 77633281  | 77714486  | TC1800001628.mm.1 | -0.1 | 0.174876 |
| TC0800000183.mm.1 | NR_028554          | Snord70 | small nucleolar RNA, C/D box 70                 | 59691934  | 59692020  | TC0100000457.mm.1 | -0.9 | 0.1749   |
| TC0800000184.mm.1 | NM_001081382       | Zfp777  | zinc finger protein 777                         | 48024188  | 48048911  | TC0600002216.mm.1 | -0.1 | 0.174919 |
| TC0800000185.mm.1 | NM_001033256       | Spat5l  | spermatogenesis associated 5-like 1             | 122630625 | 122636477 | TC0200001853.mm.1 | -0.1 | 0.174924 |
| TC0800000188.mm.1 | XR_141220          | Gm20290 | predicted gene, 20290                           | 73372861  | 73375780  | TC1400002393.mm.1 | -0.2 | 0.175388 |
| TC0800000190.mm.1 | ENSMUST00000093696 | Gm24089 | predicted gene, 24089                           | 123601572 | 123601680 | TC0800003141.mm.1 | -0.7 | 0.175509 |
| TC0800000208.mm.1 | ENSMUST00000175042 | Gm23647 | predicted gene, 23647                           | 123623637 | 123623745 | TC0800003154.mm.1 | -0.7 | 0.175509 |
| TC0800000209.mm.1 | NM_001122818       | Pnpla6  | patatin-like phospholipase domain containing 6  | 3515384   | 3544267   | TC0800000011.mm.1 | 0.1  | 0.175512 |
| TC0800000211.mm.1 | ENSMUST00000104730 | Gm22441 | predicted gene, 22441                           | 76333424  | 76333516  | TC1000000738.mm.1 | 0.4  | 0.175592 |
| TC0800000212.mm.1 | NM_177158          | Rinl    | Ras and Rab interactor-like                     | 28788969  | 28798966  | TC0700000512.mm.1 | -0.1 | 0.17598  |
| TC0800000213.mm.1 | NM_028820          | 1700017 | RIKEN cDNA 1700017B05 gene                      | 57252322  | 57262599  | TC0800003141.mm.1 | -0.1 | 0.176013 |
| TC0800000216.mm.1 | ENSMUST00000116945 | Gm22031 | predicted gene, 22031                           | 3603272   | 3603397   | TC1500001142.mm.1 | 0.2  | 0.176069 |
| TC0800000218.mm.1 | NM_009206          | Slc4a1a | solute carrier family 4 (anion exchanger), memb | 31526995  | 31554042  | TC0500000325.mm.1 | -0.1 | 0.176085 |
| TC0800000219.mm.1 | OTTMUST00000060650 | RP23-21 | ---                                             | 122391379 | 122392687 | TC0600001381.mm.1 | 0.1  | 0.17622  |
| TC0800000226.mm.1 | NR_028421          | D430020 | RIKEN cDNA D430020J02 gene                      | 116401947 | 116405161 | TC1200002497.mm.1 | -0.1 | 0.1764   |
| TC0800000227.mm.1 | ENSMUST00000174923 | Gm22406 | predicted gene, 22406                           | 105816908 | 105817000 | TC1400001208.mm.1 | 0.4  | 0.176522 |
| TC0800000231.mm.1 | NM_033144          | 8-Sep   | septin 8                                        | 53519257  | 53549565  | TC1100000608.mm.1 | 0.2  | 0.176666 |
| TC0800000232.mm.1 | NM_001244617       | B4galnt | beta-1,4-N-acetyl-galactosaminyl transferase 1  | 127165156 | 127172340 | TC1000001551.mm.1 | -0.3 | 0.177069 |
| TC0800000234.mm.1 | XM_484215          | Gm5445  | predicted gene 5445                             | 12378158  | 12378640  | TC1300000069.mm.1 | -0.4 | 0.177093 |
| TC0800000238.mm.1 | ENSMUST00000120659 | Gm12459 | predicted gene 12459                            | 49746731  | 49747246  | TC0400002645.mm.1 | -0.1 | 0.177364 |
| TC0800000241.mm.1 | ENSMUST00000101848 | Gm23142 | predicted gene, 23142                           | 21040256  | 21040360  | TC0800001836.mm.1 | 0.1  | 0.177493 |
| TC0800000242.mm.1 | XR_033816          | Gm7072  | predicted gene 7072                             | 22286590  | 22314946  | TC1700001572.mm.1 | -0.1 | 0.177524 |
| TC0800000243.mm.1 | ENSMUST00000118084 | Gm14801 | predicted gene 14801                            | 98009245  | 98009691  | TC0X00002686.mm.1 | 0.3  | 0.177652 |
| TC0800000249.mm.1 | NM_008518          | Ltb     | lymphotoxin B                                   | 35194439  | 35196320  | TC1700000673.mm.1 | -0.5 | 0.177814 |
| TC0800000254.mm.1 | NM_011025          | Oxt     | oxytocin                                        | 130576169 | 130577054 | TC0200001991.mm.1 | -0.1 | 0.177887 |
| TC0800000256.mm.1 | ENSMUST00000158532 | Gm22425 | predicted gene, 22425                           | 67792439  | 67792576  | TC0600002432.mm.1 | 0.1  | 0.177894 |
| TC0800000257.mm.1 | NM_001146049       | Htatip2 | HIV-1 tat interactive protein 2, homolog (human | 49759106  | 49774000  | TC0700000903.mm.1 | 0.1  | 0.178069 |
| TC0800000259.mm.1 | ENSMUST00000122376 | Gm11452 | predicted gene 11452                            | 162907924 | 162908613 | TC0200002473.mm.1 | -0.1 | 0.17815  |
| TC0800000260.mm.1 | NR_030545          | Mir876  | microRNA 876                                    | 36645373  | 36645453  | TC0400002414.mm.1 | 0.1  | 0.178152 |
| TC0800000261.mm.1 | ENSMUST00000181063 | Gm11960 | predicted gene 11960                            | 4561780   | 4564637   | TC1100000045.mm.1 | 0.2  | 0.178163 |
| TC0800000262.mm.1 | ENSMUST00000098127 | Gm10594 | predicted gene 10594                            | 42035113  | 42035538  | TC0400000393.mm.1 | 0.1  | 0.178229 |
| TC0800000276.mm.1 | ENSMUST00000098118 | Gm10594 | predicted gene 10594                            | 42458751  | 42459176  | TC0400002500.mm.1 | 0.1  | 0.178229 |
| TC0800000277.mm.1 | ENSMUST00000178800 | Gm10594 | predicted gene 10594                            | 80399     | 80824     | TC4_GL456350_rand | 0.1  | 0.178229 |

|                   |                    |         |                                                 |           |           |                    |      |          |
|-------------------|--------------------|---------|-------------------------------------------------|-----------|-----------|--------------------|------|----------|
| TC0800000278.mm.1 | ENSMUST00000179681 | Gm10594 | predicted gene 10594                            | 140144    | 140569    | TC4_JH584293_rand  | 0.1  | 0.178229 |
| TC0800000286.mm.1 | ENSMUST00000183599 | AC16429 | N/A                                             | 66586810  | 66586916  | TC1300002232.mm.1  | 0.5  | 0.178355 |
| TC0800000288.mm.1 | ENSMUST00000068960 | D830050 | RIKEN cDNA D830050J10 gene                      | 115675995 | 115677136 | TC0600001285.mm.1  | 0.1  | 0.178534 |
| TC0800000293.mm.1 | ENSMUST00000118176 | Gm11633 | predicted gene 11633                            | 97968792  | 97969235  | TC1100001554.mm.1  | -0.2 | 0.178548 |
| TC0800000297.mm.1 | NM_001012330       | Zbtb18  | zinc finger and BTB domain containing 18        | 177442407 | 177450764 | TC0100001671.mm.1  | -0.1 | 0.178612 |
| TC0800000309.mm.1 | ENSMUST00000102349 | Gm23062 | predicted gene, 23062                           | 94169302  | 94169411  | TC16000002116.mm.1 | 0.1  | 0.178769 |
| TC0800000312.mm.1 | NCBI_Gene:432708:p | Ighv1-5 | immunoglobulin heavy variable V1-59             | 115335057 | 115335514 | TC1200002636.mm.1  | -0.5 | 0.178777 |
| TC0800000320.mm.1 | NM_009547          | Zbtb14  | zinc finger and BTB domain containing 14        | 69383050  | 69390750  | TC1700001110.mm.1  | -0.1 | 0.178903 |
| TC0800000330.mm.1 | ENSMUST00000143083 | Gm10721 | predicted gene 10721                            | 3013140   | 3014344   | TC0900000003.mm.1  | 0.3  | 0.178929 |
| TC0800000336.mm.1 | NM_001012638       | Acd     | adrenocortical dysplasia                        | 105695860 | 105701095 | TC0800002831.mm.1  | -0.2 | 0.179039 |
| TC0800000345.mm.1 | ENSMUST00000118257 | Gm4875  | predicted gene 4875                             | 117997207 | 117997992 | TC0600001325.mm.1  | 0.2  | 0.179292 |
| TC0800000346.mm.1 | NM_025442          | Alg5    | asparagine-linked glycosylation 5 (dolichyl-pho | 54735539  | 54751127  | TC0300000412.mm.1  | 0.1  | 0.179308 |
| TC0800000353.mm.1 | ENSMUST00000157426 | Gm26150 | predicted gene, 26150                           | 36406094  | 36406244  | TC0800002063.mm.1  | -0.1 | 0.179429 |
| TC0800000370.mm.1 | NM_011335          | Ccl21b  | chemokine (C-C motif) ligand 21B (leucine)      | 1         | 1131      | TC4_GL456350_rand  | -0.8 | 0.179611 |
| TC0800000382.mm.1 | NR_029650          | Mir299  | microRNA 299                                    | 109710638 | 109710700 | TC1200001168.mm.1  | 0.1  | 0.179702 |
| TC0800000384.mm.1 | NM_019868          | Hnrnp2  | heterogeneous nuclear ribonucleoprotein H2      | 134601179 | 134607060 | TC0X00001283.mm.1  | -0.1 | 0.179706 |
| TC0800000389.mm.1 | ENSMUST00000103898 | Hmr69o  | microRNA 669o                                   | 10514300  | 10514395  | TC0200000197.mm.1  | 0.2  | 0.179896 |
| TC0800000392.mm.1 | NM_008874          | Plcb3   | phospholipase C, beta 3                         | 6952325   | 6969759   | TC1900001025.mm.1  | 0.1  | 0.180002 |
| TC0800000394.mm.1 | ENSMUST00000120626 | Gm12922 | predicted gene 12922                            | 123709219 | 123710027 | TC0400003488.mm.1  | -0.2 | 0.180161 |
| TC0800000395.mm.1 | NM_001040399       | Larp1b  | La ribonucleoprotein domain family, member 1B   | 40950631  | 40977793  | TC0300000312.mm.1  | 0.1  | 0.18044  |
| TC0800000396.mm.1 | NM_001014981       | Wdr7    | WD repeat domain 7                              | 63708695  | 63989760  | TC1800000655.mm.1  | 0.2  | 0.18051  |
| TC0800000403.mm.1 | ENSMUST00000118124 | Gm11771 | predicted gene 11771                            | 120765310 | 120767365 | TC1100002047.mm.1  | -0.1 | 0.180555 |
| TC0800000406.mm.1 | NM_197989          | Fam58b  | family with sequence similarity 58, member B    | 78750506  | 78751729  | TC1100003310.mm.1  | -0.2 | 0.180592 |
| TC0800000416.mm.1 | ENSMUST00000157978 | Gm24192 | predicted gene, 24192                           | 39830656  | 39830800  | TC1100000400.mm.1  | 0.1  | 0.180601 |
| TC0800000424.mm.1 | NM_023547          | Ino80b  | INO80 complex subunit B                         | 83121765  | 83125431  | TC0600002561.mm.1  | -0.1 | 0.180685 |
| TC0800000440.mm.1 | ENSMUST00000175391 | Gm25993 | predicted gene, 25993                           | 176879834 | 176879913 | TC0100001664.mm.1  | -0.1 | 0.180748 |
| TC0800000441.mm.1 | NM_019405          | Cetn2   | centrin 2                                       | 72913532  | 72918411  | TC1000002415.mm.1  | -0.1 | 0.180956 |
| TC0800000463.mm.1 | NM_001081465       | Gtf2ird | general transcription factor II I repeat domain | 134357661 | 134456716 | TC0500003371.mm.1  | -0.2 | 0.181011 |
| TC0800000498.mm.1 | NM_024440          | Derl3   | Der1-like domain family, member 3               | 75893398  | 75895941  | TC1000000726.mm.1  | -0.1 | 0.181058 |
| TC0800000506.mm.1 | NM_145836          | Irf2bpl | interferon regulatory factor 2 binding protein- | 86880703  | 86884814  | TC12000002110.mm.1 | 0.1  | 0.181122 |
| TC0800000509.mm.1 | NM_020614          | Taf1b   | TATA box binding protein (Tbp)-associated facto | 24498581  | 24558571  | TC1200000197.mm.1  | -0.2 | 0.181151 |
| TC0800000521.mm.1 | NM_145508          | Dyrk3   | dual-specificity tyrosine-(Y)-phosphorylation r | 131128441 | 131138234 | TC01000003055.mm.1 | 0.1  | 0.181383 |
| TC0800000523.mm.1 | ENSMUST00000121574 | Gm13502 | predicted gene 13502                            | 53696121  | 53696804  | TC0200003548.mm.1  | -0.3 | 0.181395 |
| TC0800000527.mm.1 | ENSMUST00000104653 | Gm24093 | predicted gene, 24093                           | 86845811  | 86845908  | TC1000001053.mm.1  | 0.3  | 0.181435 |
| TC0800000533.mm.1 | NM_027868          | Slc41a3 | solute carrier family 41, member 3              | 90604725  | 90646412  | TC0600001078.mm.1  | 0.1  | 0.181558 |
| TC0800000534.mm.1 | ENSMUST00000179621 | Gm22513 | predicted gene, 22513                           | 54696782  | 54696945  | TC1200000450.mm.1  | -0.3 | 0.181582 |
| TC0800000535.mm.1 | ENSMUST00000082474 | Gm23924 | predicted gene, 23924                           | 74451797  | 74451904  | TC06000002511.mm.1 | -0.8 | 0.181648 |
| TC0800000557.mm.1 | NM_001081116       | Arhgef1 | Rho guanine nucleotide exchange factor (GEF) 1  | 100869746 | 100932161 | TC0700003827.mm.1  | 0.1  | 0.181719 |
| TC0800000561.mm.1 | NM_172437          | Pus7l   | pseudouridylyl synthase 7 homolog (S. cerevisi  | 94522640  | 94543547  | TC15000002110.mm.1 | -0.1 | 0.182005 |
| TC0800000564.mm.1 | XM_891048          | Gm6676  | predicted gene 6676                             | 7116798   | 7125412   | TC1400001420.mm.1  | 0.1  | 0.182168 |
| TC0800000565.mm.1 | XM_001477839       | Gm16434 | predicted gene 16434                            | 7185927   | 7194540   | TC0X00001421.mm.1  | 0.1  | 0.182168 |
| TC0800000585.mm.1 | ENSMUST00000083161 | Gm23679 | predicted gene, 23679                           | 137150815 | 137150933 | TC0X00001354.mm.1  | -0.2 | 0.182308 |
| TC0800000587.mm.1 | NM_175417          | Adtrp   | androgen dependent TFPI regulating protein      | 41763148  | 41847684  | TC1300001868.mm.1  | 0.2  | 0.18231  |
| TC0800000594.mm.1 | NM_146202          | Zfp768  | zinc finger protein 768                         | 127342795 | 127345314 | TC0700000323.mm.1  | 0.1  | 0.182555 |
| TC0800000624.mm.1 | ENSMUST00000119542 | Gm15921 | predicted gene 15921                            | 130208080 | 130208562 | TC0500003316.mm.1  | -0.4 | 0.182721 |
| TC0800000629.mm.1 | NM_198680          | Serpinb | serine (or cysteine) peptidase inhibitor, clade | 107153940 | 107161114 | TC0100003884.mm.1  | -0.1 | 0.182758 |
| TC0800000631.mm.1 | XM_003085585       | LOC1005 | eukaryotic translation initiation factor 1A, X- | 88323832  | 88329682  | TC1200000894.mm.1  | -0.2 | 0.182982 |
| TC0800000641.mm.1 | ENSMUST00000118750 | Gm4459  | predicted gene 4459                             | 139659688 | 139660155 | TC0700004484.mm.1  | 0.3  | 0.182996 |
| TC0800000643.mm.1 | ENSMUST00000174952 | Gm22923 | predicted gene, 22923                           | 75764322  | 75764431  | TC1600000852.mm.1  | 0.2  | 0.183346 |
| TC0800000645.mm.1 | ENSMUST00000103834 | Gm22707 | predicted gene, 22707                           | 43204352  | 43204461  | TC0700000754.mm.1  | -0.1 | 0.183426 |
| TC0800000648.mm.1 | NM_053232          | Vmn1r29 | vomeronal 1 receptor 29                         | 58307268  | 58308290  | TC0600000706.mm.1  | -0.1 | 0.183544 |
| TC0800000653.mm.1 | NM_007995          | Fcna    | ficolin A                                       | 25624666  | 25628030  | TC0200003165.mm.1  | 0.2  | 0.183669 |
| TC0800000669.mm.1 | ENSMUST00000160287 | Gm3555  | predicted pseudogene 3555                       | 98457768  | 98459162  | TC0100000978.mm.1  | -0.1 | 0.183692 |
| TC0800000670.mm.1 | NM_011879          | Ik      | IK cytokine                                     | 36744656  | 36757639  | TC1800000343.mm.1  | -0.2 | 0.183795 |
| TC0800000674.mm.1 | NM_172964          | Arhgap2 | Rho GTPase activating protein 28                | 67842706  | 68004120  | TC1700002454.mm.1  | 0.1  | 0.183922 |
| TC0800000678.mm.1 | NM_001253716       | Msra    | methionine sulfoxide reductase A                | 64122621  | 64455903  | TC1400002231.mm.1  | 0.1  | 0.183992 |
| TC0800000682.mm.1 | ENSMUST00000118577 | Gm16418 | predicted pseudogene 16418                      | 166431705 | 166431875 | TC0100003469.mm.1  | 0.3  | 0.184102 |
| TC0800000691.mm.1 | ENSMUST00000175054 | Gm22690 | predicted gene, 22690                           | 16129566  | 16129675  | TC0400002252.mm.1  | 0.4  | 0.184206 |
| TC0800000694.mm.1 | ENSMUST00000083231 | Gm23815 | predicted gene, 23815                           | 69498579  | 69498685  | TC0700003469.mm.1  | -0.7 | 0.184256 |
| TC0800000698.mm.1 | NM_199305          | Tmem39b | transmembrane protein 39b                       | 129676355 | 129696838 | TC0400003611.mm.1  | -0.1 | 0.184369 |
| TC0800000700.mm.1 | ENSMUST00000102075 | Gm24098 | predicted gene, 24098                           | 38238572  | 38238680  | TC1500000289.mm.1  | 0.3  | 0.18438  |
| TC0800000714.mm.1 | ENSMUST00000102078 | Gm25381 | predicted gene, 25381                           | 39308470  | 39308578  | TC1500001429.mm.1  | 0.3  | 0.18438  |
| TC0800000726.mm.1 | ENSMUST00000179111 | Gm23934 | predicted gene, 23934                           | 80135466  | 80135572  | TC0100000691.mm.1  | -0.7 | 0.184412 |
| TC0800000731.mm.1 | ENSMUST00000179419 | Gm24182 | predicted gene, 24182                           | 167349025 | 167349131 | TC0100001549.mm.1  | -0.7 | 0.184412 |
| TC0800000732.mm.1 | ENSMUST00000178275 | Gm25829 | predicted gene, 25829                           | 54249102  | 54249208  | TC0100002347.mm.1  | -0.7 | 0.184412 |
| TC0800000744.mm.1 | ENSMUST00000179775 | Gm22360 | predicted gene, 22360                           | 95832129  | 95832235  | TC0100002849.mm.1  | -0.7 | 0.184412 |
| TC0800000754.mm.1 | ENSMUST00000083413 | Gm25583 | predicted gene, 25583                           | 141640490 | 141640596 | TC0200002116.mm.1  | -0.7 | 0.184412 |
| TC0800000756.mm.1 | ENSMUST00000083150 | Gm26496 | predicted gene, 26496                           | 126109908 | 126110014 | TC0200004534.mm.1  | -0.7 | 0.184412 |
| TC0800000759.mm.1 | ENSMUST00000083311 | Gm22295 | predicted gene, 22295                           | 67055958  | 67056064  | TC0300000539.mm.1  | -0.7 | 0.184412 |
| TC0800000773.mm.1 | ENSMUST00000083855 | Gm25869 | predicted gene, 25869                           | 103427437 | 103427543 | TC0300001052.mm.1  | -0.7 | 0.184412 |
| TC0800000774.mm.1 | ENSMUST00000083854 | Gm22682 | predicted gene, 22682                           | 130205465 | 130205571 | TC0300001319.mm.1  | -0.7 | 0.184412 |
| TC0800000780.mm.1 | ENSMUST00000083336 | Gm25127 | predicted gene, 25127                           | 149028932 | 149029038 | TC0300001510.mm.1  | -0.7 | 0.184412 |
| TC0800000782.mm.1 | ENSMUST00000083204 | Gm24458 | predicted gene, 24458                           | 151608343 | 151608449 | TC0300001522.mm.1  | -0.7 | 0.184412 |
| TC0800000786.mm.1 | ENSMUST00000083992 | Gm22798 | predicted gene, 22798                           | 52722649  | 52722755  | TC0300001975.mm.1  | -0.7 | 0.184412 |
| TC0800000787.mm.1 | ENSMUST00000083741 | Gm24260 | predicted gene, 24260                           | 139417757 | 139417863 | TC03000003030.mm.1 | -0.7 | 0.184412 |
| TC0800000790.mm.1 | ENSMUST00000179782 | Gm24978 | predicted gene, 24978                           | 16675923  | 16676029  | TC0400000147.mm.1  | -0.7 | 0.184412 |
| TC0800000795.mm.1 | ENSMUST00000179791 | Gm24967 | predicted gene, 24967                           | 108466944 | 108467050 | TC0400003244.mm.1  | -0.7 | 0.184412 |
| TC0800000796.mm.1 | ENSMUST00000178290 | Gm22092 | predicted gene, 22092                           | 116922384 | 116922490 | TC0400003355.mm.1  | -0.7 | 0.184412 |

|                   |                    |         |                                                 |           |           |                    |      |          |
|-------------------|--------------------|---------|-------------------------------------------------|-----------|-----------|--------------------|------|----------|
| TC0800000798.mm.1 | ENSMUST00000179274 | Gm25737 | predicted gene, 25737                           | 13549506  | 13549612  | TC0600000097.mm.1  | -0.7 | 0.184412 |
| TC0800000800.mm.1 | ENSMUST00000180294 | Gm26058 | predicted gene, 26058                           | 10840587  | 10840693  | TC0600001859.mm.1  | -0.7 | 0.184412 |
| TC0800000803.mm.1 | ENSMUST00000082973 | Gm25405 | predicted gene, 25405                           | 104423274 | 104423380 | TC0700001522.mm.1  | -0.7 | 0.184412 |
| TC0800000813.mm.1 | ENSMUST00000083434 | Gm24414 | predicted gene, 24414                           | 11967150  | 11967256  | TC0700002332.mm.1  | -0.7 | 0.184412 |
| TC0800000817.mm.1 | ENSMUST00000083293 | Gm25790 | predicted gene, 25790                           | 84323309  | 84323415  | TC0700003653.mm.1  | -0.7 | 0.184412 |
| TC0800000818.mm.1 | ENSMUST00000177941 | Gm22822 | predicted gene, 22822                           | 109774612 | 109774718 | TC0700004082.mm.1  | -0.7 | 0.184412 |
| TC0800000823.mm.1 | ENSMUST00000083885 | Gm24693 | predicted gene, 24693                           | 99072463  | 99072569  | TC0800001160.mm.1  | -0.7 | 0.184412 |
| TC0800000832.mm.1 | ENSMUST00000093648 | Gm26427 | predicted gene, 26427                           | 7428222   | 7428328   | TC0800001649.mm.1  | -0.7 | 0.184412 |
| TC0800000834.mm.1 | ENSMUST00000082953 | Gm24205 | predicted gene, 24205                           | 66002346  | 66002452  | TC0800002326.mm.1  | -0.7 | 0.184412 |
| TC0800000840.mm.1 | ENSMUST00000179535 | Gm25064 | predicted gene, 25064                           | 63133283  | 63133389  | TC0900000797.mm.1  | -0.7 | 0.184412 |
| TC0800000844.mm.1 | ENSMUST00000179904 | Gm22288 | predicted gene, 22288                           | 50405813  | 50405919  | TC0X00000451.mm.1  | -0.7 | 0.184412 |
| TC0800000846.mm.1 | ENSMUST00000083727 | Gm22580 | predicted gene, 22580                           | 83536031  | 83536137  | TC0X00000814.mm.1  | -0.7 | 0.184412 |
| TC0800000849.mm.1 | ENSMUST00000083894 | Gm26317 | predicted gene, 26317                           | 162069457 | 162069562 | TC0X00001641.mm.1  | -0.7 | 0.184412 |
| TC0800000852.mm.1 | ENSMUST00000177746 | Gm25256 | predicted gene, 25256                           | 19782854  | 19782960  | TC1000000146.mm.1  | -0.7 | 0.184412 |
| TC0800000868.mm.1 | ENSMUST00000178420 | Gm24486 | predicted gene, 24486                           | 70882104  | 70882210  | TC1000000683.mm.1  | -0.7 | 0.184412 |
| TC0800000885.mm.1 | ENSMUST00000178620 | Gm24019 | predicted gene, 24019                           | 79909195  | 79909301  | TC1000000826.mm.1  | -0.7 | 0.184412 |
| TC0800000891.mm.1 | ENSMUST00000179260 | Gm26243 | predicted gene, 26243                           | 79985506  | 79985612  | TC1000000832.mm.1  | -0.7 | 0.184412 |
| TC0800000895.mm.1 | ENSMUST00000178844 | Gm25709 | predicted gene, 25709                           | 117662282 | 117662388 | TC1000002939.mm.1  | -0.7 | 0.184412 |
| TC0800000910.mm.1 | ENSMUST00000083693 | Gm24803 | predicted gene, 24803                           | 4324149   | 4324255   | TC1100002111.mm.1  | -0.7 | 0.184412 |
| TC0800000916.mm.1 | ENSMUST00000082729 | Gm24859 | predicted gene, 24859                           | 52603788  | 52603894  | TC1200000429.mm.1  | -0.7 | 0.184412 |
| TC0800000919.mm.1 | ENSMUST00000082478 | Gm22246 | predicted gene, 22246                           | 95619818  | 95619924  | TC1200000950.mm.1  | -0.7 | 0.184412 |
| TC0800000929.mm.1 | ENSMUST00000097247 | Gm22170 | predicted gene, 22170                           | 13507862  | 13507968  | TC1200001440.mm.1  | -0.7 | 0.184412 |
| TC0800000930.mm.1 | ENSMUST00000082555 | Gm23296 | predicted gene, 23296                           | 52604485  | 52604591  | TC1200001734.mm.1  | -0.7 | 0.184412 |
| TC0800000931.mm.1 | ENSMUST00000179101 | Gm24873 | predicted gene, 24873                           | 17440790  | 17440896  | TC1300000119.mm.1  | -0.7 | 0.184412 |
| TC0800000932.mm.1 | ENSMUST00000179754 | Gm22823 | predicted gene, 22823                           | 41247686  | 41247792  | TC1400000414.mm.1  | -0.7 | 0.184412 |
| TC0800000937.mm.1 | ENSMUST00000177627 | Gm24540 | predicted gene, 24540                           | 73767862  | 73767968  | TC1400002397.mm.1  | -0.7 | 0.184412 |
| TC0800000941.mm.1 | ENSMUST00000178183 | Gm24753 | predicted gene, 24753                           | 77067791  | 77067897  | TC1500000618.mm.1  | -0.7 | 0.184412 |
| TC0800000945.mm.1 | ENSMUST00000178482 | Gm23217 | predicted gene, 23217                           | 72255350  | 72255456  | TC1500001678.mm.1  | -0.7 | 0.184412 |
| TC0800000949.mm.1 | ENSMUST00000179690 | Gm26295 | predicted gene, 26295                           | 30814162  | 30814268  | TC1600000399.mm.1  | -0.7 | 0.184412 |
| TC0800000951.mm.1 | ENSMUST00000178877 | Gm25547 | predicted gene, 25547                           | 14807163  | 14807269  | TC1600001250.mm.1  | -0.7 | 0.184412 |
| TC0800000959.mm.1 | ENSMUST00000179017 | Gm24722 | predicted gene, 24722                           | 84391429  | 84391535  | TC1700001261.mm.1  | -0.7 | 0.184412 |
| TC0800000960.mm.1 | NR_003027          | Rnu6    | U6 small nuclear RNA                            | 13432033  | 13432139  | TC1700001471.mm.1  | -0.7 | 0.184412 |
| TC0800000962.mm.1 | ENSMUST00000180237 | Gm23512 | predicted gene, 23512                           | 67174885  | 67174991  | TC1800001498.mm.1  | -0.7 | 0.184412 |
| TC0800000965.mm.1 | NM_144945          | Lgi2    | leucine-rich repeat LGI family, member 2        | 52537864  | 52566303  | TC0500002411.mm.1  | 0.1  | 0.184483 |
| TC0800000971.mm.1 | NM_026585          | Fam21   | family with sequence similarity 21              | 116208033 | 116262671 | TC0600001293.mm.1  | 0.2  | 0.184587 |
| TC0800000975.mm.1 | NM_029891          | Nkrf    | NF-kappaB repressing factor                     | 36887540  | 36902899  | TC0X00002052.mm.1  | -0.2 | 0.18459  |
| TC0800000976.mm.1 | ENSMUST00000083869 | Gm23040 | predicted gene, 23040                           | 98506954  | 98507116  | TC0700001369.mm.1  | 0.1  | 0.184783 |
| TC0800000977.mm.1 | ENSMUST00000032981 | Gm9755  | predicted pseudogene 9755                       | 67514000  | 67515606  | TC0800002338.mm.1  | -0.2 | 0.184896 |
| TC0800000978.mm.1 | NR_028480          | Gm12238 | predicted gene 12238                            | 55482694  | 55482833  | TC1100000648.mm.1  | -0.9 | 0.184914 |
| TC0800000983.mm.1 | ENSMUST00000122785 | Gm25804 | predicted gene, 25804                           | 13329484  | 13329671  | TC1300000084.mm.1  | -0.1 | 0.18495  |
| TC0800000991.mm.1 | ENSMUST00000083785 | n-R5s12 | nuclear encoded rRNA 5S 12                      | 136277505 | 136277623 | TC0X00001324.mm.1  | 0.1  | 0.185211 |
| TC0800001002.mm.1 | NM_009087          | Polr1d  | polymerase (RNA) I polypeptide D                | 147077050 | 147111361 | TC0500001799.mm.1  | -0.1 | 0.185222 |
| TC0800001003.mm.1 | NM_009853          | Cd68    | CD68 antigen                                    | 69664213  | 69666153  | TC1100003055.mm.1  | 0.5  | 0.185229 |
| TC0800001012.mm.1 | XM_485703          | Gm5566  | predicted pseudogene 5566                       | 149660652 | 149668937 | TC0500003661.mm.1  | -0.2 | 0.185402 |
| TC0800001016.mm.1 | NCBI_Gene:668493:p | Ighv1-1 | Ighv1-19-1 immunoglobulin heavy variable 1-19-  | 114704147 | 114704440 | TC1200002611.mm.1  | -0.6 | 0.185559 |
| TC0800001031.mm.1 | ENSMUST00000093411 | Gm8054  | predicted pseudogene 8054                       | 78869401  | 78869868  | TC0800002513.mm.1  | -0.4 | 0.185637 |
| TC0800001039.mm.1 | ENSMUST00000175594 | Gm22119 | predicted gene, 22119                           | 2446010   | 2446108   | TC0Y00000239.mm.1  | 0.2  | 0.185675 |
| TC0800001069.mm.1 | NM_011564          | Sry     | sex determining region of Chr Y                 | 2662471   | 2663658   | TC0Y00000240.mm.1  | -0.4 | 0.185851 |
| TC0800001077.mm.1 | ENSMUST00000183616 | RP23-93 | N/A                                             | 32709652  | 32711171  | TC0900001996.mm.1  | -0.2 | 0.185973 |
| TC0800001092.mm.1 | ENSMUST00000122502 | Gm24594 | predicted gene, 24594                           | 60928086  | 60928184  | TC1300000740.mm.1  | 0.1  | 0.186107 |
| TC0800001093.mm.1 | NM_019966          | Mlycd   | malonyl-CoA decarboxylase                       | 119394878 | 119411102 | TC0800001419.mm.1  | 0.1  | 0.186358 |
| TC0800001094.mm.1 | NM_010922          | Mrpl40  | mitochondrial ribosomal protein L40             | 18872018  | 18876767  | TC1600001322.mm.1  | -0.1 | 0.186524 |
| TC0800001095.mm.1 | NM_028182          | Sh2d4a  | SH2 domain containing 4A                        | 68276528  | 68347704  | TC0800000700.mm.1  | 0.1  | 0.186534 |
| TC0800001097.mm.1 | NM_029841          | 2510039 | RIKEN cDNA 2510039018 gene                      | 147940895 | 147947314 | TC0400001920.mm.1  | -0.2 | 0.186641 |
| TC0800001103.mm.1 | NCBI_Gene:629893:p | Ighv1-3 | immunoglobulin heavy variable 1-31              | 114829264 | 114829557 | TC1200002619.mm.1  | -0.9 | 0.186847 |
| TC0800001108.mm.1 | NM_024233          | Rexo2   | REX2, RNA exonuclease 2 homolog (S. cerevisiae) | 48468512  | 48480611  | TC0900002235.mm.1  | 0.2  | 0.186885 |
| TC0800001112.mm.1 | OTTMUST00000062119 | AC16053 | ---                                             | 88739247  | 88739729  | TC0500002715.mm.1  | -0.5 | 0.186983 |
| TC0800001121.mm.1 | ENSMUST00000083108 | Gm24043 | predicted gene, 24043                           | 96444955  | 96445070  | TC1400001145.mm.1  | -0.4 | 0.187066 |
| TC0800001122.mm.1 | NM_001025589       | Rfxank  | regulatory factor X-associated ankyrin-containi | 70130806  | 70139197  | TC0800002385.mm.1  | -0.2 | 0.187234 |
| TC0800001124.mm.1 | ENSMUST00000083981 | Gm24445 | predicted gene, 24445                           | 122982837 | 122982943 | TC0800003088.mm.1  | -0.5 | 0.187351 |
| TC0800001126.mm.1 | ENSMUST00000180256 | Rpl28-p | ribosomal protein L28, pseudogene 1             | 128038527 | 128039022 | TC0100001128.mm.1  | -0.4 | 0.187383 |
| TC0800001142.mm.1 | ENSMUST00000091520 | Zfp85-r | zinc finger protein 85, related sequence 1      | 67747800  | 67755228  | TC1300002260.mm.1  | -0.2 | 0.187393 |
| TC0800001147.mm.1 | NM_001162903       | Ccdc71l | coiled-coil domain containing 71 like           | 32378704  | 32382943  | TC1200000278.mm.1  | -0.1 | 0.187498 |
| TC0800001152.mm.1 | NM_001164107       | Ripk3   | receptor-interacting serine-threonine kinase 3  | 55784995  | 55788857  | TC1400002103.mm.1  | -0.2 | 0.187503 |
| TC0800001155.mm.1 | ENSMUST00000179317 | Gm7258  | predicted gene 7258                             | 128595973 | 128596278 | TC07000004370.mm.1 | 0.1  | 0.187546 |
| TC0800001156.mm.1 | NM_008856          | Prkch   | protein kinase C, eta                           | 73584797  | 73778185  | TC1200000647.mm.1  | -0.3 | 0.187572 |
| TC0800001157.mm.1 | NM_011156          | Prep    | prolyl endopeptidase                            | 45067206  | 45158997  | TC1000000422.mm.1  | -0.4 | 0.187583 |
| TC0800001160.mm.1 | ENSMUST00000183151 | Gm26977 | predicted gene, 26977                           | 79875587  | 79876582  | TC1800001649.mm.1  | -0.1 | 0.187691 |
| TC0800001164.mm.1 | NM_001101486       | Fam71f2 | family with sequence similarity 71, member F2   | 29279593  | 29290680  | TC0600000227.mm.1  | 0.1  | 0.187704 |
| TC0800001169.mm.1 | NM_133362          | Erd1r   | erythroid differentiation regulator 1           | 90784610  | 90816465  | TC0Y00000223.mm.1  | -0.3 | 0.187734 |
| TC0800001176.mm.1 | NM_172281          | Rnf40   | ring finger protein 40                          | 127588698 | 127603605 | TC0700001855.mm.1  | -0.1 | 0.187774 |
| TC0800001182.mm.1 | NM_022325          | Ctsz    | cathepsin Z                                     | 174427493 | 174439039 | TC0200005314.mm.1  | 0.3  | 0.187819 |
| TC0800001195.mm.1 | ENSMUST00000083950 | Gm22864 | predicted gene, 22864                           | 75280626  | 75280755  | TC0400002874.mm.1  | -0.3 | 0.187839 |
| TC0800001197.mm.1 | NM_175245          | Mzt1    | mitotic spindle organizing protein 1            | 99034544  | 99046136  | TC1400002598.mm.1  | -0.2 | 0.18797  |
| TC0800001204.mm.1 | NM_008965          | Ptger4  | prostaglandin E receptor 4 (subtype EP4)        | 5206661   | 5244187   | TC1500001155.mm.1  | -0.2 | 0.188053 |
| TC0800001205.mm.1 | NM_001037711       | Cgn     | cingulin                                        | 94760069  | 94786515  | TC0300002453.mm.1  | -0.1 | 0.188099 |
| TC0800001206.mm.1 | ENSMUST00000185094 | CTO3064 | N/A                                             | 61336455  | 61336561  | TC1300000742.mm.1  | 0.5  | 0.188128 |
| TC0800001207.mm.1 | NM_175168          | Ptk7    | PTK7 protein tyrosine kinase 7                  | 46564451  | 46629504  | TC1700002181.mm.1  | -0.1 | 0.188149 |

|                   |                    |         |                                                 |           |           |                   |      |          |
|-------------------|--------------------|---------|-------------------------------------------------|-----------|-----------|-------------------|------|----------|
| TC0800001210.mm.1 | NM_153151          | Acat3   | acetyl-Coenzyme A acetyltransferase 3           | 12923833  | 12940402  | TC1700001458.mm.1 | 0.1  | 0.188196 |
| TC0800001213.mm.1 | ENSMUST00000157990 | Gm22485 | predicted gene, 22485                           | 27489269  | 27489377  | TC1400000279.mm.1 | 0.1  | 0.188224 |
| TC0800001219.mm.1 | NM_146089          | Haus1   | HAUS augmin-like complex, subunit 1             | 77757567  | 77767780  | TC1800001632.mm.1 | -0.2 | 0.188336 |
| TC0800001221.mm.1 | NM_001081128       | Mtr     | 5-methyltetrahydrofolate-homocysteine methyl    | 12186538  | 12258113  | TC1300001445.mm.1 | -0.1 | 0.188499 |
| TC0800001226.mm.1 | NCBI_Gene:238418:p | Ighv14- | immunoglobulin heavy variable V14-3             | 114059844 | 114060321 | TC1200002582.mm.1 | -0.5 | 0.188667 |
| TC0800001230.mm.1 | NM_001001181       | BC03118 | cDNA sequence BC031181                          | 75005868  | 75009934  | TC1800000801.mm.1 | 0.2  | 0.188792 |
| TC0800001231.mm.1 | NM_009553          | Zscan2  | zinc finger and SCAN domain containing 2        | 80860920  | 80876516  | TC0700001160.mm.1 | -0.1 | 0.18894  |
| TC0800001232.mm.1 | NM_011998          | Chst4   | carbohydrate (chondroitin 6/keratan) sulfotrans | 110029075 | 110039354 | TC0800002918.mm.1 | 0.1  | 0.188982 |
| TC0800001233.mm.1 | ENSMUST00000077420 | Rpl21-p | ribosomal protein L21, pseudogene 7             | 83288546  | 83289028  | TC1700001238.mm.1 | -0.5 | 0.189075 |
| TC0800001236.mm.1 | BC092139           | Rpl31   | ribosomal protein L31                           | 101790292 | 101790881 | TC0700001437.mm.1 | -0.1 | 0.1893   |
| TC0800001244.mm.1 | NM_133229          | Ripply3 | rippy3 homolog (zebrafish)                      | 94328420  | 94336935  | TC1600001054.mm.1 | 0.1  | 0.189403 |
| TC0800001245.mm.1 | ENSMUST00000083225 | Gm25482 | predicted gene, 25482                           | 44945022  | 44945128  | TC1900000657.mm.1 | 0.2  | 0.189505 |
| TC0800001251.mm.1 | NM_025989          | Gp2     | glycoprotein 2 (zymogen granule membrane)       | 119442544 | 119459272 | TC0700004182.mm.1 | -0.1 | 0.189582 |
| TC0800001253.mm.1 | ENSMUST00000120088 | Gm15519 | predicted gene 15519                            | 112563642 | 112565207 | TC0600001234.mm.1 | 0.3  | 0.189767 |
| TC0800001255.mm.1 | NM_011392          | Slc34a1 | solute carrier family 34 (sodium phosphate), me | 55399648  | 55414695  | TC1300000658.mm.1 | 0.8  | 0.18978  |
| TC0800001256.mm.1 | NM_008838          | Pigf    | phosphatidylinositol glycan anchor biosynthesis | 86997256  | 87025406  | TC1700002680.mm.1 | -0.1 | 0.189981 |
| TC0800001258.mm.1 | NM_028228          | Pinx1   | PIN2/TERF1 interacting, telomerase inhibitor 1  | 63860312  | 63919859  | TC1400000910.mm.1 | -0.2 | 0.190105 |
| TC0800001265.mm.1 | NM_009359          | Tex9    | testis expressed gene 9                         | 72450394  | 72510922  | TC0900002640.mm.1 | -0.1 | 0.190222 |
| TC0800001279.mm.1 | ENSMUST00000083453 | n-R5s85 | nuclear encoded rRNA 5S 85                      | 65836353  | 65836465  | TC0900000852.mm.1 | 0.3  | 0.190276 |
| TC0800001280.mm.1 | ENSMUST00000179236 | Gm26138 | predicted gene, 26138                           | 57877389  | 57877495  | TC0400002728.mm.1 | -0.7 | 0.190296 |
| TC0800001281.mm.1 | ENSMUST00000082660 | Gm23330 | predicted gene, 23330                           | 19560253  | 19560416  | TC0300000130.mm.1 | -0.3 | 0.190318 |
| TC0800001297.mm.1 | ENSMUST00000117826 | Gm5510  | predicted pseudogene 5510                       | 6152715   | 6153200   | TC1900000104.mm.1 | 0.1  | 0.190396 |
| TC0800001300.mm.1 | ENSMUST00000116952 | Gm23842 | predicted gene, 23842                           | 59815975  | 59816064  | TC0200003589.mm.1 | 0.4  | 0.190562 |
| TC0800001302.mm.1 | NM_012048          | Polk    | polymerase (DNA directed), kappa                | 96480689  | 96542546  | TC1300002471.mm.1 | -0.1 | 0.190614 |
| TC0800001316.mm.1 | ENSMUST00000178604 | Gm5472  | predicted gene 5472                             | 45978358  | 45980037  | TC1500001472.mm.1 | -0.1 | 0.190627 |
| TC0800001325.mm.1 | NCBI_Gene:110785:p | Igk1    | Igk1 immunoglobulin lambda constant 1           | 19061382  | 19260844  | TC1600001324.mm.1 | -0.8 | 0.190645 |
| TC0800001329.mm.1 | ENSMUST00000120352 | Gm5555  | predicted pseudogene 5555                       | 49552257  | 49553270  | TC0900000512.mm.1 | -0.2 | 0.190742 |
| TC0800001336.mm.1 | NCBI_Gene:382696:p | Ighv1-5 | immunoglobulin heavy variable 1-52              | 115145487 | 115145919 | TC1200002629.mm.1 | -1.0 | 0.19108  |
| TC0800001339.mm.1 | ENSMUST00000121801 | Rpl13-p | ribosomal protein L13, pseudogene 1             | 85111126  | 85111793  | TC1100003425.mm.1 | -0.2 | 0.191082 |
| TC0800001343.mm.1 | NR_028512          | Snora73 | small nucleolar RNA, H/ACA box 73a              | 0         | 0         | TSUnmapped0000017 | -0.7 | 0.191108 |
| TC0800001344.mm.1 | ENSMUST00000117029 | Gm23488 | predicted gene, 23488                           | 60241709  | 60241799  | TC1000000546.mm.1 | 0.4  | 0.191212 |
| TC0800001345.mm.1 | ENSMUST00000078232 | Gm10129 | predicted gene 10129                            | 38151433  | 38151439  | TC1300001831.mm.1 | -0.1 | 0.191325 |
| TC0800001358.mm.1 | NM_011216          | Ptpro   | protein tyrosine phosphatase, receptor type, O  | 137252299 | 137464634 | TC0600001634.mm.1 | 0.1  | 0.191398 |
| TC0800001390.mm.1 | NM_011224          | Pygm    | muscle glycogen phosphorylase                   | 6384399   | 6398459   | TC1900000117.mm.1 | 0.1  | 0.191525 |
| TC0800001392.mm.1 | ENSMUST00000100617 | Gm6740  | predicted gene 6740                             | 52861767  | 52862630  | TC1400002041.mm.1 | 0.1  | 0.191531 |
| TC0800001398.mm.1 | ENSMUST00000100598 | Gm6755  | predicted gene 6755                             | 53172727  | 53173590  | TC1400002043.mm.1 | 0.1  | 0.191531 |
| TC0800001407.mm.1 | NM_001081112       | Ankrd26 | ankyrin repeat domain 26                        | 118502564 | 118562256 | TC0600003003.mm.1 | -0.1 | 0.191589 |
| TC0800001413.mm.1 | ENSMUST00000180276 | Gm22347 | predicted gene, 22347                           | 102329530 | 102329661 | TC1400002628.mm.1 | 0.2  | 0.191646 |
| TC0800001414.mm.1 | NM_145413          | Fam20b  | family with sequence similarity 20, member B    | 156678545 | 156719001 | TC0100003321.mm.1 | 0.2  | 0.191658 |
| TC0800001416.mm.1 | NM_029627          | Ly6k    | lymphocyte antigen 6 complex, locus K           | 74796874  | 74799986  | TC1500001720.mm.1 | -0.1 | 0.192039 |
| TC0800001418.mm.1 | NM_133755          | Tubgcp2 | tubulin, gamma complex associated protein 2     | 139995955 | 140036674 | TC0700004489.mm.1 | -0.2 | 0.192155 |
| TC0800001419.mm.1 | NM_145953          | Cth     | cystathionase (cystathionine gamma-lyase)       | 157894248 | 157925077 | TC0300003194.mm.1 | 0.3  | 0.192542 |
| TC0800001429.mm.1 | NM_133673          | Tor1b   | torsin family 1, member B                       | 30952959  | 30959015  | TC0200000545.mm.1 | 0.1  | 0.192635 |
| TC0800001436.mm.1 | ENSMUST00000158291 | Gm22607 | predicted gene, 22607                           | 9834498   | 9834602   | TC0100001946.mm.1 | 0.2  | 0.192659 |
| TC0800001437.mm.1 | ENSMUST00000116782 | Gm23178 | predicted gene, 23178                           | 67274869  | 67274963  | TC1400002285.mm.1 | 0.3  | 0.19276  |
| TC0800001451.mm.1 | NM_134007          | Cisd1   | CDGSH iron sulfur domain 1                      | 71330480  | 71344954  | TC1000002358.mm.1 | 0.2  | 0.19283  |
| TC0800001464.mm.1 | ENSMUST00000083972 | Gm26107 | predicted gene, 26107                           | 137067892 | 137067998 | TC0300001390.mm.1 | -0.6 | 0.19285  |
| TC0800001472.mm.1 | ENSMUST00000080726 | Gm10040 | predicted gene 10040                            | 68733137  | 68738077  | TC0300000568.mm.1 | -0.4 | 0.192928 |
| TC0800001487.mm.1 | ENSMUST00000104684 | Gm23913 | predicted gene, 23913                           | 17949458  | 17949548  | TC1200001476.mm.1 | 0.3  | 0.192935 |
| TC0800001494.mm.1 | ENSMUST00000178090 | Gm5808  | predicted gene 5808                             | 99555836  | 99556192  | TC1500002215.mm.1 | -0.2 | 0.192965 |
| TC0800001497.mm.1 | NM_001160135       | Gm20806 | predicted gene, 20806                           | 78835721  | 78836719  | TC0Y00000485.mm.1 | 0.2  | 0.192968 |
| TC0800001500.mm.1 | XM_001474425       | Gm20841 | predicted gene, 20841                           | 80756212  | 80757210  | TC0Y00000495.mm.1 | 0.2  | 0.192968 |
| TC0800001511.mm.1 | NM_147007          | Olf394  | olfactory receptor 394                          | 73887438  | 73888370  | TC1100003181.mm.1 | 0.1  | 0.193015 |
| TC0800001512.mm.1 | NM_019434          | Mcm3ap  | minichromosome maintenance deficient 3 (S. ce   | 76468971  | 76515857  | TC1000000743.mm.1 | -0.1 | 0.193187 |
| TC0800001514.mm.1 | ENSMUST00000082868 | Gm24036 | predicted gene, 24036                           | 12054148  | 12054303  | TC1100002231.mm.1 | 0.1  | 0.193432 |
| TC0800001518.mm.1 | ENSMUST00000082560 | Gm22063 | predicted gene, 22063                           | 105172496 | 105172602 | TC0800001205.mm.1 | -0.7 | 0.193591 |
| TC0800001522.mm.1 | ENSMUST00000082490 | Gm22749 | predicted gene, 22749                           | 101223592 | 101223698 | TC1200002240.mm.1 | -0.6 | 0.193654 |
| TC0800001525.mm.1 | ENSMUST00000103461 | Ighv7-3 | immunoglobulin heavy variable 7-3               | 114153184 | 114153644 | TC1200002585.mm.1 | -0.8 | 0.19376  |
| TC0800001528.mm.1 | NM_170599          | Igsf11  | immunoglobulin superfamily, member 11           | 38901471  | 39027159  | TC1600000564.mm.1 | 0.1  | 0.193786 |
| TC0800001531.mm.1 | ENSMUST00000082790 | Gm25852 | predicted gene, 25852                           | 97547438  | 97547567  | TC0600002806.mm.1 | -0.2 | 0.193788 |
| TC0800001533.mm.1 | ENSMUST00000117498 | Gm15770 | predicted gene 15770                            | 142852616 | 142853199 | TC0500003535.mm.1 | -0.1 | 0.193995 |
| TC0800001542.mm.1 | ENSMUST00000104647 | Gm23401 | predicted gene, 23401                           | 87727241  | 87727333  | TC0600001014.mm.1 | 0.4  | 0.194113 |
| TC0800001543.mm.1 | NR_029732          | Mirlet7 | microRNA let7f-2                                | 151912346 | 151912428 | TC0X00001529.mm.1 | 0.1  | 0.194183 |
| TC0800001547.mm.1 | ENSMUST00000071118 | Plp2    | proteolipid protein 2                           | 97098237  | 97099296  | TC1300002477.mm.1 | 0.3  | 0.194392 |
| TC0800001551.mm.1 | NM_009022          | Aldh1a2 | aldehyde dehydrogenase family 1, subfamily A2   | 71215789  | 71296243  | TC0900000950.mm.1 | 0.2  | 0.194424 |
| TC0800001556.mm.1 | NR_028557          | Snord98 | small nucleolar RNA, C/D box 98                 | 62765576  | 62765640  | TC1000002268.mm.1 | -0.4 | 0.194474 |
| TC0800001572.mm.1 | NR_029740          | Mir23a  | microRNA 23a                                    | 84208518  | 84208592  | TC0800000951.mm.1 | 0.1  | 0.194591 |
| TC0800001577.mm.1 | ENSMUST00000175310 | Gm24813 | predicted gene, 24813                           | 63347671  | 63347754  | TC1700001051.mm.1 | -0.8 | 0.194656 |
| TC0800001585.mm.1 | NCBI_Gene:434025:p | Igkv9-1 | immunoglobulin kappa chain variable 9-120       | 68049983  | 68050456  | TC0600003515.mm.1 | -0.8 | 0.19479  |
| TC0800001597.mm.1 | NM_026876          | Trmt1l  | tRNA methyltransferase 1 like                   | 151428648 | 151458183 | TC0100001353.mm.1 | -0.1 | 0.194945 |
| TC0800001602.mm.1 | ENSMUST00000121408 | Gm15329 | predicted gene 15329                            | 34521750  | 34521904  | TC1700001915.mm.1 | -0.2 | 0.195128 |
| TC0800001604.mm.1 | NM_199008          | Cox11   | cytochrome c oxidase assembly protein 11        | 90638173  | 90645977  | TC1100001400.mm.1 | -0.1 | 0.1952   |
| TC0800001606.mm.1 | NR_035494          | Mir1968 | microRNA 1968                                   | 13189031  | 13189098  | TC0800001729.mm.1 | -0.1 | 0.195253 |
| TC0800001611.mm.1 | NM_001162910       | Gm3604  | predicted gene 3604                             | 62367716  | 62383174  | TC1300002161.mm.1 | -0.2 | 0.19531  |
| TC0800001612.mm.1 | ENSMUST00000178898 | Gm21830 | predicted gene, 21830                           | 67413725  | 67433086  | TC0200000967.mm.1 | 0.2  | 0.195639 |
| TC0800001613.mm.1 | ENSMUST00000183509 | SMAD5-A | SMAD5 antisense RNA 1 conserved region 4        | 56704030  | 56704199  | TC1300000696.mm.1 | -0.2 | 0.195663 |
| TC0800001619.mm.1 | NCBI_Gene:10004257 | Trav3n- | Trav3n-2 T cell receptor alpha variable 3N-2    | 53198525  | 53199018  | TC1400000669.mm.1 | -0.1 | 0.195861 |
| TC0800001622.mm.1 | NM_008949          | Psmc3ip | proteasome (prosome, macropain) 26S subunit,    | 101091823 | 101095436 | TC1100003792.mm.1 | -0.1 | 0.195889 |

|                   |                    |         |                                                 |           |           |                   |      |          |
|-------------------|--------------------|---------|-------------------------------------------------|-----------|-----------|-------------------|------|----------|
| TC0800001623.mm.1 | NM_001166413       | Arhgef2 | Rho guanine nucleotide exchange factor (GEF) 2! | 127182521 | 127190054 | TC1000003103.mm.1 | 0.0  | 0.196003 |
| TC0800001632.mm.1 | NM_001166581       | BC00556 | cDNA sequence BC005561                          | 104508352 | 104522383 | TC0500001028.mm.1 | -0.1 | 0.196153 |
| TC0800001633.mm.1 | ENSMUST00000064995 | Gm13835 | predicted gene 13835                            | 31141979  | 31142663  | TC0600002015.mm.1 | -0.3 | 0.196235 |
| TC0800001641.mm.1 | NM_001160251       | Zfp281  | zinc finger protein 281                         | 136624901 | 136630391 | TC0100001274.mm.1 | -0.1 | 0.19629  |
| TC0800001643.mm.1 | ENSMUST00000158430 | Gm22675 | predicted gene, 22675                           | 28595127  | 28595230  | TC0200000488.mm.1 | 0.2  | 0.196352 |
| TC0800001647.mm.1 | NM_011801          | Cfdp1   | craniofacial development protein 1              | 111768473 | 111854310 | TC0800002955.mm.1 | -0.2 | 0.196446 |
| TC0800001649.mm.1 | NM_025873          | Trit1   | tRNA isopentenyltransferase 1                   | 123016597 | 123054949 | TC0400001387.mm.1 | -0.2 | 0.196573 |
| TC0800001654.mm.1 | ENSMUST00000180191 | Gm25473 | predicted gene, 25473                           | 86236855  | 86236961  | TC0500002679.mm.1 | -0.7 | 0.19658  |
| TC0800001674.mm.1 | ENSMUST00000157272 | Gm25283 | predicted gene, 25283                           | 47637143  | 47637219  | TC0600000532.mm.1 | 0.2  | 0.196595 |
| TC0800001687.mm.1 | NM_011734          | Siae    | sialic acid acetyltransferase                   | 37613847  | 37648318  | TC0900000370.mm.1 | 0.2  | 0.196757 |
| TC0800001694.mm.1 | ENSMUST00000106916 | Gm12790 | predicted gene 12790                            | 101967453 | 101981049 | TC0400003163.mm.1 | 0.1  | 0.19685  |
| TC0800001700.mm.1 | ENSMUST00000104709 | Gm25787 | predicted gene, 25787                           | 111792920 | 111793011 | TC0700004114.mm.1 | 0.3  | 0.196924 |
| TC0800001701.mm.1 | NM_018775          | Tbc1d8  | TBC1 domain family, member 8                    | 39371495  | 39478747  | TC0100002236.mm.1 | -0.1 | 0.196928 |
| TC0800001705.mm.1 | NM_001166390       | Ptp4a3  | protein tyrosine phosphatase 4a3                | 73723145  | 73758766  | TC1500000524.mm.1 | -0.3 | 0.197053 |
| TC0800001727.mm.1 | NR_028129          | AF35739 | snoRNA AF357399                                 | 28351508  | 28351633  | TC0700000496.mm.1 | -0.7 | 0.197056 |
| TC0800001728.mm.1 | ENSMUST00000144172 | Gm12226 | predicted pseudogene 12226                      | 54401092  | 54401967  | TC1100000623.mm.1 | -0.2 | 0.197057 |
| TC0800001729.mm.1 | NM_174249          | Smndc1  | survival motor neuron domain containing 1       | 53379214  | 53390573  | TC1900001671.mm.1 | -0.1 | 0.197152 |
| TC0800001734.mm.1 | NM_144549          | Trih1   | tribbles homolog 1 (Drosophila)                 | 59648350  | 59657099  | TC1500000439.mm.1 | 0.1  | 0.197156 |
| TC0800001737.mm.1 | NM_027193          | Dph5    | DPH5 homolog (S. cerevisiae)                    | 115888165 | 115934361 | TC0300001181.mm.1 | -0.1 | 0.197232 |
| TC0800001745.mm.1 | ENSMUST00000082933 | Gm25039 | predicted gene, 25039                           | 86384247  | 86384353  | TC0300000685.mm.1 | -0.6 | 0.197259 |
| TC0800001752.mm.1 | ENSMUST00000157801 | Gm22555 | predicted gene, 22555                           | 130011837 | 130011898 | TC0600001542.mm.1 | 0.2  | 0.197266 |
| TC0800001766.mm.1 | ENSMUST00000120888 | Gm15267 | predicted gene 15267                            | 152043049 | 152043512 | TC0X00003186.mm.1 | -0.3 | 0.197343 |
| TC0800001790.mm.1 | NM_001008700       | Il4ra   | interleukin 4 receptor, alpha                   | 125552282 | 125579474 | TC0700001793.mm.1 | -0.3 | 0.197423 |
| TC0800001792.mm.1 | ENSMUST00000082719 | Gm26129 | predicted gene, 26129                           | 14087439  | 14087545  | TC1300000096.mm.1 | -0.6 | 0.197449 |
| TC0800001794.mm.1 | NM_026784          | Pmvk    | phosphomevalonate kinase                        | 89454541  | 89469013  | TC0300000766.mm.1 | 0.1  | 0.197545 |
| TC0800001796.mm.1 | NM_207253          | Olfr137 | olfactory receptor 1371                         | 52213052  | 52213987  | TC1100002714.mm.1 | 0.1  | 0.197605 |
| TC0800001797.mm.1 | NM_007913          | Egr1    | early growth response 1                         | 34859823  | 34864984  | TC1800000301.mm.1 | -0.1 | 0.197724 |
| TC0800001808.mm.1 | NM_001013792       | Fam105b | family with sequence similarity 105, member B   | 27605919  | 27630693  | TC1500001299.mm.1 | -0.1 | 0.197764 |
| TC0800001810.mm.1 | NM_020625          | Zbtb22  | zinc finger and BTB domain containing 22        | 33915904  | 33919325  | TC1700002777.mm.1 | 0.1  | 0.197845 |
| TC0800001827.mm.1 | NM_001243048       | Arntl   | aryl hydrocarbon receptor nuclear translocator- | 113207465 | 113314126 | TC0700001660.mm.1 | -0.3 | 0.197883 |
| TC0800001836.mm.1 | NCBI_Gene:384514:p | Igkv4-5 | immunoglobulin kappa variable 4-57-1            | 69544359  | 69544892  | TC0600003569.mm.1 | -0.7 | 0.197886 |
| TC0800001838.mm.1 | NM_178417          | Zfp867  | zinc finger protein 867                         | 59461197  | 59472474  | TC1100002852.mm.1 | -0.1 | 0.198021 |
| TC0800001840.mm.1 | NCBI_Gene:627394:p | Trav6d- | T cell receptor alpha variable 6D-3             | 52725299  | 52726920  | TC1400000623.mm.1 | -0.2 | 0.198066 |
| TC0800001843.mm.1 | NM_025649          | Mad2l1b | MAD2L1 binding protein                          | 46147385  | 46153553  | TC1700002165.mm.1 | -0.1 | 0.198089 |
| TC0800001845.mm.1 | ENSMUST00000103760 | Mir467e | microRNA 467e                                   | 10505721  | 10505807  | TC0200000177.mm.1 | 0.2  | 0.198097 |
| TC0800001847.mm.1 | ENSMUST00000182253 | Gm5205  | predicted gene 5205                             | 40557238  | 40558240  | TC1400000408.mm.1 | -0.1 | 0.198187 |
| TC0800001849.mm.1 | NM_175381          | 2700081 | RIKEN cDNA 2700081O15 gene                      | 7417625   | 7425904   | TC1900000137.mm.1 | -0.1 | 0.198348 |
| TC0800001851.mm.1 | NR_002852          | Rnu5g   | RNA, U5G small nuclear                          | 65201726  | 65201841  | TC0900002506.mm.1 | -0.7 | 0.198352 |
| TC0800001852.mm.1 | NR_002852          | Rnu5g   | RNA, U5G small nuclear                          | 0         | 0         | TSUnmapped0000017 | -0.7 | 0.198352 |
| TC0800001855.mm.1 | NM_133661          | Slc6a12 | solute carrier family 6 (neurotransmitter trans | 121343076 | 121365775 | TC0600001371.mm.1 | 0.1  | 0.198606 |
| TC0800001856.mm.1 | ENSMUST00000119404 | Gm13603 | predicted gene 13603                            | 67765977  | 67766059  | TC0200000977.mm.1 | -0.2 | 0.198646 |
| TC0800001857.mm.1 | NM_001039546       | Myo6    | myosin VI                                       | 80165031  | 80311729  | TC0900001070.mm.1 | 0.3  | 0.198672 |
| TC0800001863.mm.1 | ENSMUST00000179774 | Gm22550 | predicted gene, 22550                           | 54118995  | 54119101  | TC0X00000488.mm.1 | -0.7 | 0.198889 |
| TC0800001865.mm.1 | NM_007917          | Elf4e   | eukaryotic translation initiation factor 4E     | 138526191 | 138557599 | TC0300001416.mm.1 | -0.2 | 0.198921 |
| TC0800001867.mm.1 | ENSMUST00000082971 | Gm25403 | predicted gene, 25403                           | 65367301  | 65367443  | TC0800000678.mm.1 | 0.3  | 0.198944 |
| TC0800001870.mm.1 | NM_001252456       | Ptpns   | protein tyrosine phosphatase, receptor type, S  | 56412426  | 56476483  | TC1700002324.mm.1 | 0.1  | 0.199017 |
| TC0800001871.mm.1 | NM_001033481       | Myrf    | myelin regulatory factor                        | 10208271  | 10240748  | TC1900001097.mm.1 | 0.2  | 0.19904  |
| TC0800001875.mm.1 | ENSMUST00000080279 | Rpl21-p | ribosomal protein L21, pseudogene 14            | 4861169   | 4861651   | TC0800000043.mm.1 | -0.4 | 0.199124 |
| TC0800001878.mm.1 | ENSMUST00000083259 | Gm23459 | predicted gene, 23459                           | 106261123 | 106261253 | TC1400002671.mm.1 | -0.1 | 0.19924  |
| TC0800001881.mm.1 | ENSMUST00000104721 | Gm22976 | predicted gene, 22976                           | 51223587  | 51223680  | TC0500000519.mm.1 | 0.3  | 0.199255 |
| TC0800001883.mm.1 | NM_182782          | Klhl25  | kelch-like 25                                   | 75848338  | 75874130  | TC0700001098.mm.1 | -0.1 | 0.199314 |
| TC0800001884.mm.1 | ENSMUST00000179460 | TUBB5   | ---                                             | 7179365   | 7180699   | TC0500000039.mm.1 | -0.2 | 0.199321 |
| TC0800001886.mm.1 | ENSMUST00000184721 | AC16681 | N/A                                             | 45160695  | 45160801  | TC0300000333.mm.1 | 0.4  | 0.199323 |
| TC0800001891.mm.1 | ENSMUST00000118301 | Gm12230 | predicted gene 12230                            | 54947435  | 54947888  | TC1100000639.mm.1 | -0.1 | 0.199324 |
| TC0800001901.mm.1 | NM_001033765       | 1700071 | RIKEN cDNA 1700071K01 gene                      | 81572502  | 81573539  | TC1100003356.mm.1 | 0.1  | 0.199435 |
| TC0800001902.mm.1 | NM_023054          | Utp3    | UTP3, small subunit (SSU) processome compone    | 88554469  | 88556083  | TC0500000813.mm.1 | -0.2 | 0.199629 |
| TC0800001903.mm.1 | NM_010648          | Klra3   | killer cell lectin-like receptor, subfamily A,  | 130323287 | 130337626 | TC0600003613.mm.1 | -0.1 | 0.19966  |
| TC0800001919.mm.1 | ENSMUST00000103318 | Igkv2-1 | immunoglobulin kappa variable 2-116             | 68151885  | 68152619  | TC0600000793.mm.1 | -0.3 | 0.199688 |
| TC0800001925.mm.1 | ENSMUST00000104460 | Gm24988 | predicted gene, 24988                           | 160876202 | 160876322 | TC0100003367.mm.1 | -0.4 | 0.199869 |
| TC0800001926.mm.1 | NCBI_Gene:629865:p | Ighv1-1 | immunoglobulin heavy variable 1-15              | 114657353 | 114657777 | TC1200002609.mm.1 | -0.5 | 0.199875 |
| TC0800001927.mm.1 | ENSMUST00000181698 | Gm5421  | predicted gene 5421                             | 22343439  | 22345792  | TC1000000179.mm.1 | 0.2  | 0.199927 |
| TC0800001951.mm.1 | NM_025644          | Exosc1  | exosome component 1                             | 41922980  | 41933314  | TC1900001514.mm.1 | -0.2 | 0.200101 |
| TC0800001955.mm.1 | NM_133884          | Gpn2    | GPN-loop GTPase 2                               | 133584362 | 133591735 | TC0400001615.mm.1 | -0.1 | 0.200111 |
| TC0800001960.mm.1 | NM_001043322       | Fmn1    | formin 1                                        | 113327736 | 113716767 | TC0200001681.mm.1 | 0.1  | 0.2002   |
| TC0800001961.mm.1 | ENSMUST00000120427 | Gm11448 | predicted gene 11448                            | 161287220 | 161287669 | TC0200002464.mm.1 | -0.2 | 0.200279 |
| TC0800001963.mm.1 | ENSMUST00000072532 | Rpl21-p | ribosomal protein L21-ps13                      | 139719399 | 139719881 | TC0700001994.mm.1 | -0.5 | 0.200334 |
| TC0800001976.mm.1 | BC128266           | Olfr545 | olfactory receptor 545                          | 102493823 | 102494773 | TC0700003861.mm.1 | 0.1  | 0.20035  |
| TC0800001977.mm.1 | NR_102282          | Cops5   | COP9 (constitutive photomorphogenic) homolog    | 10024600  | 10038159  | TC0100001952.mm.1 | -0.1 | 0.20036  |
| TC0800001981.mm.1 | ENSMUST00000167577 | Gm7352  | predicted gene 7352                             | 19511367  | 19512558  | TC1400000154.mm.1 | -0.2 | 0.200414 |
| TC0800001982.mm.1 | NM_011313          | S100a6  | S100 calcium binding protein A6 (calcyclin)     | 90612894  | 90614415  | TC0300000809.mm.1 | 0.2  | 0.20043  |
| TC0800001994.mm.1 | ENSMUST00000177864 | Gm24407 | predicted gene, 24407                           | 115490254 | 115490394 | TC0500001263.mm.1 | -0.4 | 0.200464 |
| TC0800002003.mm.1 | ENSMUST00000175512 | Gm22930 | predicted gene, 22930                           | 24423394  | 24423492  | TC0X00001963.mm.1 | 0.3  | 0.200499 |
| TC0800002004.mm.1 | NM_025700          | Pgm1    | phosphoglucomutase 1                            | 64092936  | 64128355  | TC0500000589.mm.1 | -0.1 | 0.20059  |
| TC0800002008.mm.1 | NM_146699          | Olfr144 | olfactory receptor 1445                         | 12883855  | 12884855  | TC1900000258.mm.1 | 0.1  | 0.200994 |
| TC0800002021.mm.1 | NM_146201          | Zfp553  | zinc finger protein 553                         | 127233061 | 127508184 | TC0700001838.mm.1 | 0.0  | 0.201046 |
| TC0800002022.mm.1 | NR_003547          | Zf12    | Zf12 pseudogene                                 | 268799    | 270075    | TCX_GL456233_rand | -0.2 | 0.201223 |
| TC0800002023.mm.1 | NM_019832          | Gkap1   | G kinase anchoring protein 1                    | 58233351  | 58274188  | TC1300002096.mm.1 | 0.2  | 0.20136  |
| TC0800002026.mm.1 | NM_178876          | Ints3   | integrator complex subunit 3                    | 90391380  | 90433636  | TC0300002370.mm.1 | -0.1 | 0.20139  |

|                   |                    |         |                                                 |           |           |                    |      |          |
|-------------------|--------------------|---------|-------------------------------------------------|-----------|-----------|--------------------|------|----------|
| TC0800002027.mm.1 | NCBI_Gene:668478:p | lghv1-9 | immunoglobulin heavy variable V1-9              | 114583569 | 114584002 | TC1200002605.mm.1  | -0.7 | 0.201435 |
| TC0800002043.mm.1 | XM_001476571       | Gm3244  | predicted pseudogene 3244                       | 73809458  | 73809911  | TC1500001702.mm.1  | 0.3  | 0.201436 |
| TC0800002058.mm.1 | ENSMUST00000119107 | Pgam1-p | phosphoglycerate mutase 1, pseudogene 1         | 21683308  | 21684056  | TC1100002331.mm.1  | -0.1 | 0.201475 |
| TC0800002062.mm.1 | ENSMUST00000140484 | Gm11382 | predicted pseudogene 11382                      | 32938524  | 32938691  | TC1300001765.mm.1  | 0.1  | 0.201536 |
| TC0800002063.mm.1 | NM_172540          | Trmt2b  | TRM2 tRNA methyltransferase 2B                  | 134222339 | 134276984 | TC0X00002990.mm.1  | -0.1 | 0.201569 |
| TC0800002086.mm.1 | ENSMUST00000120059 | Gm5388  | predicted gene 5388                             | 51218877  | 51219993  | TC0X000002197.mm.1 | -0.1 | 0.201661 |
| TC0800002089.mm.1 | ENSMUST00000118705 | Gm14039 | predicted gene 14039                            | 129362759 | 129362859 | TC0200004601.mm.1  | -0.2 | 0.201777 |
| TC0800002091.mm.1 | NM_027381          | Cactin  | cactin, spliceosome C complex subunit           | 81321103  | 81326251  | TC1000000893.mm.1  | -0.1 | 0.201839 |
| TC0800002100.mm.1 | ENSMUST00000175176 | Mir3472 | microRNA 3472                                   | 145039344 | 145039414 | TC0X00001433.mm.1  | 0.2  | 0.201863 |
| TC0800002101.mm.1 | NR_037309          | Mir3472 | microRNA 3472                                   | 0         | 0         | TSUnmapped0000012  | 0.2  | 0.201863 |
| TC0800002110.mm.1 | ENSMUST00000109160 | Gm11011 | predicted gene 11011                            | 169582845 | 169587745 | TC0200005235.mm.1  | 0.2  | 0.201909 |
| TC0800002121.mm.1 | ENSMUST00000104459 | Gm24981 | predicted gene, 24981                           | 67566850  | 67566981  | TC1400000961.mm.1  | 0.2  | 0.202055 |
| TC0800002122.mm.1 | NM_011755          | Zfp35   | zinc finger protein 35                          | 23989632  | 24005376  | TC1800000190.mm.1  | -0.1 | 0.202134 |
| TC0800002123.mm.1 | NM_025295          | Btd     | biotinidase                                     | 31641028  | 31668579  | TC1400000331.mm.1  | 0.1  | 0.2022   |
| TC0800002127.mm.1 | NM_198608          | Aars2   | alanyl-tRNA synthetase 2, mitochondrial (putati | 45506841  | 45520843  | TC1700000862.mm.1  | -0.1 | 0.202243 |
| TC0800002130.mm.1 | ENSMUST00000104266 | Gm25918 | predicted gene, 25918                           | 34162324  | 34162426  | TC0500000369.mm.1  | -0.1 | 0.202299 |
| TC0800002131.mm.1 | NR_033580          | 4933401 | GLE1 RNA export mediator pseudogene             | 107542479 | 107543800 | TC0X00001089.mm.1  | 0.1  | 0.202448 |
| TC0800002136.mm.1 | ENSMUST00000083386 | Gm22056 | predicted gene, 22056                           | 113928724 | 113928804 | TC0500003053.mm.1  | -0.3 | 0.202474 |
| TC0800002144.mm.1 | ENSMUST00000178517 | Gm26465 | predicted gene, 26465                           | 88970623  | 88970729  | TC0300002331.mm.1  | -0.7 | 0.202556 |
| TC0800002145.mm.1 | ENSMUST00000179184 | Gm25021 | predicted gene, 25021                           | 17436306  | 17436412  | TC0600000130.mm.1  | -0.7 | 0.202556 |
| TC0800002146.mm.1 | ENSMUST00000178706 | Gm24864 | predicted gene, 24864                           | 83938369  | 83938475  | TC0900002769.mm.1  | -0.7 | 0.202556 |
| TC0800002148.mm.1 | ENSMUST00000179714 | Gm24424 | predicted gene, 24424                           | 54449958  | 54450064  | TC1400002056.mm.1  | -0.7 | 0.202556 |
| TC0800002154.mm.1 | ENSMUST00000179962 | Gm24389 | predicted gene, 24389                           | 34687696  | 34687802  | TC1700001921.mm.1  | -0.7 | 0.202556 |
| TC0800002156.mm.1 | ENSMUST00000179703 | Gm14675 | predicted gene 14675                            | 65103824  | 65104270  | TC0X00000589.mm.1  | 0.2  | 0.202598 |
| TC0800002157.mm.1 | ENSMUST00000118619 | Gm8644  | predicted gene 8644                             | 157650704 | 157651299 | TC0X000003254.mm.1 | -0.1 | 0.20276  |
| TC0800002178.mm.1 | NM_019786          | Tbk1    | TANK-binding kinase 1                           | 121546455 | 121586794 | TC1000003049.mm.1  | -0.2 | 0.202787 |
| TC0800002180.mm.1 | NR_029731          | Mirlet7 | microRNA let7f-1                                | 48537829  | 48537917  | TC1300001942.mm.1  | 0.2  | 0.20281  |
| TC0800002233.mm.1 | ENSMUST00000120972 | Defa-ps | defensin, alpha, pseudogene 8                   | 21270693  | 21271997  | TC0800000227.mm.1  | -0.2 | 0.202946 |
| TC0800002235.mm.1 | NM_001011776       | Olfr527 | olfactory receptor 527                          | 140335843 | 140336820 | TC0700002011.mm.1  | -0.2 | 0.203043 |
| TC0800002236.mm.1 | NM_177140          | Tmem251 | transmembrane protein 251                       | 102743740 | 102747561 | TC1200001020.mm.1  | -0.1 | 0.203137 |
| TC0800002243.mm.1 | ENSMUST00000175443 | Gm25693 | predicted gene, 25693                           | 38037179  | 38037263  | TC1100002537.mm.1  | 0.3  | 0.203139 |
| TC0800002252.mm.1 | ENSMUST00000116867 | Gm23109 | predicted gene, 23109                           | 29334934  | 29335059  | TC1100000292.mm.1  | 0.1  | 0.203218 |
| TC0800002256.mm.1 | ENSMUST00000158346 | Gm23764 | predicted gene, 23764                           | 102806099 | 102806146 | TC1400001179.mm.1  | -0.5 | 0.203218 |
| TC0800002261.mm.1 | ENSMUST00000054322 | Gm15163 | predicted gene 15163                            | 157015331 | 157120545 | TC0X000003245.mm.1 | 0.1  | 0.203324 |
| TC0800002287.mm.1 | ENSMUST00000120915 | Gm12400 | predicted gene 12400                            | 98680832  | 98688182  | TC0300002557.mm.1  | -0.2 | 0.203337 |
| TC0800002292.mm.1 | NM_028347          | Neil1   | nei endonuclease VIII-like 1 (E. coli)          | 57142798  | 57148212  | TC0900002365.mm.1  | -0.2 | 0.203351 |
| TC0800002295.mm.1 | NM_001171739       | Bag1    | BCL2-associated athanogene 1                    | 40936398  | 40948294  | TC0400002454.mm.1  | 0.3  | 0.203496 |
| TC0800002307.mm.1 | ENSMUST00000098955 | Gm16589 | predicted gene 16589                            | 4087543   | 4089900   | TC0800000026.mm.1  | 0.2  | 0.203524 |
| TC0800002309.mm.1 | NM_001112729       | Tti2    | TEL02 interacting protein 2                     | 31150316  | 31164703  | TC0800000370.mm.1  | -0.1 | 0.203566 |
| TC0800002310.mm.1 | ENSMUST00000117838 | Gm13226 | predicted gene 13226                            | 145576889 | 145577292 | TC0400003965.mm.1  | -0.3 | 0.20358  |
| TC0800002323.mm.1 | ENSMUST00000117320 | Gm15578 | predicted gene 15578                            | 156816037 | 156816511 | TC0300001570.mm.1  | -0.1 | 0.203587 |
| TC0800002324.mm.1 | XR_104842          | Gm19451 | predicted gene, 19451                           | 88138135  | 88139656  | TC0300002300.mm.1  | 0.1  | 0.203626 |
| TC0800002326.mm.1 | ENSMUST00000122573 | Gm25819 | predicted gene, 25819                           | 68996002  | 68996085  | TC1100000889.mm.1  | 0.2  | 0.203644 |
| TC0800002335.mm.1 | NM_175439          | Mars2   | methionine-tRNA synthetase 2 (mitochondrial)    | 55237124  | 55240058  | TC0100000399.mm.1  | -0.1 | 0.20377  |
| TC0800002336.mm.1 | NM_134178          | Vmn1r22 | vomeronasal 1 receptor 22                       | 57899959  | 57901054  | TC0600002358.mm.1  | 0.1  | 0.203855 |
| TC0800002338.mm.1 | ENSMUST00000104214 | Gm25418 | predicted gene, 25418                           | 90504615  | 90504743  | TC1800000915.mm.1  | 0.2  | 0.203969 |
| TC0800002339.mm.1 | ENSMUST00000178461 | Gm22549 | predicted gene, 22549                           | 87341455  | 87341561  | TC0100002761.mm.1  | -0.3 | 0.204102 |
| TC0800002376.mm.1 | NM_029037          | 4930444 | RIKEN cDNA 4930444A02 gene                      | 25980604  | 25994121  | TC0800001926.mm.1  | 0.2  | 0.204129 |
| TC0800002384.mm.1 | NM_001243307       | Ccdc85b | coiled-coil domain containing 85B               | 5453163   | 5457563   | TC1900000965.mm.1  | -0.1 | 0.20415  |
| TC0800002385.mm.1 | ENSMUST00000122493 | Gm26253 | predicted gene, 26253                           | 20194633  | 20194735  | TC1100002295.mm.1  | -0.2 | 0.204288 |
| TC0800002390.mm.1 | NCBI_Gene:195180:p | lghv9-1 | immunoglobulin heavy variable 9-1               | 114093928 | 114141163 | TC1200002583.mm.1  | -0.7 | 0.204304 |
| TC0800002392.mm.1 | NM_025432          | Trappc2 | trafficking protein particle complex 2          | 166440574 | 166453140 | TC0X00001684.mm.1  | 0.1  | 0.204345 |
| TC0800002398.mm.1 | ENSMUST00000178565 | Gm25633 | predicted gene, 25633                           | 49825869  | 49825975  | TC0900002259.mm.1  | -0.6 | 0.204387 |
| TC0800002401.mm.1 | ENSMUST00000157630 | Gm24288 | predicted gene, 24288                           | 6223819   | 6223962   | TC0800001647.mm.1  | -0.1 | 0.204543 |
| TC0800002402.mm.1 | NM_024442          | Cyp4f16 | cytochrome P450, family 4, subfamily f, polypep | 32536558  | 32551798  | TC1700000564.mm.1  | 0.1  | 0.204605 |
| TC0800002403.mm.1 | NM_0027123         | Fastkd3 | FAST kinase domains 3                           | 68582248  | 68592338  | TC1300000838.mm.1  | -0.1 | 0.204618 |
| TC0800002405.mm.1 | OTTMUST00000042178 | RP23-3G | ---                                             | 53882343  | 53884556  | TC0X00002250.mm.1  | -0.2 | 0.204716 |
| TC0800002410.mm.1 | NM_001142943       | Zfp949  | zinc finger protein 949                         | 88548020  | 88571086  | TC0900001132.mm.1  | -0.1 | 0.2049   |
| TC0800002412.mm.1 | NM_013607          | Myh11   | myosin, heavy polypeptide 11, smooth muscle     | 14194527  | 14291408  | TC1600001247.mm.1  | 0.2  | 0.204918 |
| TC0800002414.mm.1 | ENSMUST00000103972 | Gm24118 | predicted gene, 24118                           | 56240560  | 56240685  | TC1400000802.mm.1  | 0.1  | 0.204958 |
| TC0800002418.mm.1 | ENSMUST00000080237 | Rpl21-p | ribosomal protein L21, pseudogene 4             | 11227552  | 11227992  | TC1400000093.mm.1  | -0.5 | 0.205619 |
| TC0800002425.mm.1 | NM_009090          | Polr2c  | polymerase (RNA) II (DNA directed) polypeptide  | 94857450  | 94864242  | TC0800001124.mm.1  | -0.3 | 0.205755 |
| TC0800002428.mm.1 | NM_030133          | Srbd1   | S1 RNA binding domain 1                         | 85984665  | 86145175  | TC1700002665.mm.1  | -0.1 | 0.20594  |
| TC0800002429.mm.1 | ENSMUST00000098889 | Defa-ps | defensin, alpha, pseudogene 18                  | 21445069  | 21446004  | TC0800000238.mm.1  | -0.1 | 0.206208 |
| TC0800002431.mm.1 | ENSMUST00000077493 | Gm8412  | predicted gene 8412                             | 27858058  | 27858497  | TC1800000421.mm.1  | -0.4 | 0.206211 |
| TC0800002432.mm.1 | NM_001033929       | Thnsl2  | threonine synthase-like 2 (bacterial)           | 71128166  | 71144380  | TC0600002460.mm.1  | 0.2  | 0.206417 |
| TC0800002440.mm.1 | ENSMUST00000178587 | Gm25229 | predicted gene, 25229                           | 59414091  | 59414169  | TC0700003164.mm.1  | -0.1 | 0.206509 |
| TC0800002447.mm.1 | NM_001081282       | Iltk    | inhibitor of Bruton agammaglobulinemia tyrosin  | 85687360  | 85749334  | TC0900002772.mm.1  | -0.1 | 0.206581 |
| TC0800002453.mm.1 | XR_140554          | LOC6281 | zinc finger protein 709-like                    | 176140919 | 176153422 | TC0200005346.mm.1  | 0.4  | 0.206713 |
| TC0800002456.mm.1 | NR_030448          | Mir680- | microRNA 680-2                                  | 22057713  | 22379223  | TC0900001896.mm.1  | -0.1 | 0.206797 |
| TC0800002462.mm.1 | ENSMUST00000157109 | Gm24646 | predicted gene, 24646                           | 45879550  | 45879648  | TC0900002210.mm.1  | -0.2 | 0.207088 |
| TC0800002463.mm.1 | NM_008224          | Hcfc1   | host cell factor C1                             | 73942792  | 73966357  | TC0X00002441.mm.1  | -0.3 | 0.207263 |
| TC0800002466.mm.1 | NM_201358          | Lymr4   | LYR motif containing 4                          | 35978797  | 36117357  | TC1300001806.mm.1  | -0.1 | 0.207311 |
| TC0800002468.mm.1 | ENSMUST00000122596 | n-R5s80 | nuclear encoded rRNA 5S 80                      | 105804087 | 105804197 | TC1000002807.mm.1  | 0.2  | 0.207354 |
| TC0800002471.mm.1 | ENSMUST00000111862 | Gm6490  | predicted gene 6490                             | 41517217  | 41519215  | TC1400000417.mm.1  | -0.1 | 0.207424 |
| TC0800002481.mm.1 | NM_010454          | Hoxa6   | homeobox A6                                     | 52205431  | 52208722  | TC0600002280.mm.1  | 0.1  | 0.207437 |
| TC0800002486.mm.1 | NM_015732          | Axin2   | axin2                                           | 108920349 | 108950783 | TC1100001820.mm.1  | 0.1  | 0.207495 |
| TC0800002488.mm.1 | NM_026849          | Mtmr14  | myotubularin related protein 14                 | 113237843 | 113281392 | TC0600001243.mm.1  | -0.1 | 0.207594 |

|                   |                    |                |                                                                          |           |           |                    |      |          |
|-------------------|--------------------|----------------|--------------------------------------------------------------------------|-----------|-----------|--------------------|------|----------|
| TC0800002490.mm.1 | ENSMUST00000184465 | AC12532        | N/A                                                                      | 22274070  | 22274176  | TC1500000141.mm.1  | 0.4  | 0.207716 |
| TC0800002493.mm.1 | NCBI_Gene:780939:p | Ighv1-5        | immunoglobulin heavy variable 1-58                                       | 115312166 | 115312599 | TC1200002635.mm.1  | -0.5 | 0.207888 |
| TC0800002494.mm.1 | ENSMUST00000121346 | Gm11383        | predicted gene 11383                                                     | 33120516  | 33121322  | TC1300001768.mm.1  | -0.1 | 0.208144 |
| TC0800002495.mm.1 | ENSMUST00000116718 | Gm25773        | predicted gene, 25773                                                    | 26626185  | 26626311  | TC0300001755.mm.1  | 0.2  | 0.208319 |
| TC0800002497.mm.1 | NM_172630          | Mppe1          | metallophosphoesterase 1                                                 | 67225047  | 67245830  | TC1800001500.mm.1  | -0.1 | 0.208436 |
| TC0800002502.mm.1 | ENSMUST00000104584 | Gm22373        | predicted gene, 22373                                                    | 59923034  | 59923122  | TC0700003343.mm.1  | 0.2  | 0.208503 |
| TC0800002505.mm.1 | NM_001113486       | 9-Sep septin 9 |                                                                          | 117199661 | 117362325 | TC1100001956.mm.1  | -0.2 | 0.208662 |
| TC0800002510.mm.1 | NM_001198985       | Tjp2           | tight junction protein 2                                                 | 24094502  | 24225026  | TC1900001273.mm.1  | 0.1  | 0.208736 |
| TC0800002513.mm.1 | ENSMUST00000177609 | Gm22308        | predicted gene, 22308                                                    | 59214946  | 59215052  | TC0500002446.mm.1  | -0.7 | 0.209068 |
| TC0800002514.mm.1 | ENSMUST00000117016 | Gm25000        | predicted gene, 25000                                                    | 60529296  | 60529409  | TC1300002136.mm.1  | 0.4  | 0.209079 |
| TC0800002516.mm.1 | ENSMUST00000104827 | Gm23029        | predicted gene, 23029                                                    | 112893734 | 112893825 | TC0X00001133.mm.1  | 0.3  | 0.209188 |
| TC0800002518.mm.1 | ENSMUST00000179427 | Gm23287        | predicted gene, 23287                                                    | 117210844 | 117210959 | TC0400001284.mm.1  | -0.8 | 0.209324 |
| TC0800002522.mm.1 | NM_025807          | Slc16a9        | solute carrier family 16 (monocarboxylic acid t                          | 70245100  | 70285968  | TC1000000674.mm.1  | 0.1  | 0.209327 |
| TC0800002523.mm.1 | NM_023900          | Plekhlj1       | pleckstrin homology domain containing, family J                          | 80796099  | 80798626  | TC1000002514.mm.1  | 0.1  | 0.209417 |
| TC0800002526.mm.1 | NR_028263          | B130006        | RIKEN cDNA B130006D01 gene                                               | 95723586  | 95726773  | TC1100001470.mm.1  | -0.1 | 0.209448 |
| TC0800002535.mm.1 | ENSMUST00000168078 | Gm17046        | predicted gene 17046                                                     | 5877076   | 5877925   | TC1400000052.mm.1  | 0.2  | 0.209475 |
| TC0800002537.mm.1 | ENSMUST00000157835 | Gm24747        | predicted gene, 24747                                                    | 72111234  | 72111320  | TC0800000813.mm.1  | 0.1  | 0.209497 |
| TC0800002542.mm.1 | NM_020010          | Cyp51          | cytochrome P450, family 51                                               | 4080674   | 4104746   | TC0500001894.mm.1  | 0.2  | 0.20964  |
| TC0800002544.mm.1 | ENSMUST00000083942 | Gm25682        | predicted gene, 25682                                                    | 10100953  | 10101116  | TC1000000070.mm.1  | -0.3 | 0.209666 |
| TC0800002553.mm.1 | NM_013640          | Psmb10         | proteasome (prosome, macropain) subunit, beta                            | 105935728 | 105938392 | TC0800002842.mm.1  | -0.3 | 0.209691 |
| TC0800002561.mm.1 | NM_172660          | D2Wsu81        | DNA segment, Chr 2, Wayne State University 81,                           | 30173447  | 30178459  | TC0200003264.mm.1  | -0.1 | 0.20975  |
| TC0800002565.mm.1 | ENSMUST00000108961 | Gm11009        | predicted gene 11009                                                     | 176317638 | 176319494 | TC0200005347.mm.1  | 0.2  | 0.209802 |
| TC0800002567.mm.1 | NM_001163748       | Pde9a          | phosphodiesterase 9A                                                     | 31386234  | 31476310  | TC1700000535.mm.1  | 0.1  | 0.210021 |
| TC0800002569.mm.1 | ENSMUST00000082828 | Gm23738        | predicted gene, 23738                                                    | 68182532  | 68182702  | TC0400000748.mm.1  | -0.1 | 0.210048 |
| TC0800002572.mm.1 | XM_003689046       | Gm21661        | predicted gene, 21661                                                    | 23097865  | 23098578  | TC0Y00000062.mm.1  | 0.2  | 0.210129 |
| TC0800002576.mm.1 | XM_001477562       | Gm20919        | predicted gene, 20919                                                    | 79074227  | 79074940  | TC0Y000000486.mm.1 | 0.2  | 0.210129 |
| TC0800002578.mm.1 | NM_009398          | Tnfaip6        | tumor necrosis factor alpha induced protein 6                            | 52038009  | 52056686  | TC0200000819.mm.1  | 0.1  | 0.210141 |
| TC0800002579.mm.1 | NM_008214          | Hars           | histidyl-tRNA synthetase                                                 | 36766528  | 36783205  | TC1800001200.mm.1  | -0.2 | 0.210148 |
| TC0800002581.mm.1 | NM_024262          | Smg8           | smg-8 homolog, nonsense mediated mRNA deca                               | 87077732  | 87086777  | TC1100003469.mm.1  | -0.2 | 0.210202 |
| TC0800002585.mm.1 | ENSMUST00000119849 | Gm12623        | predicted gene 12623                                                     | 60573567  | 60575549  | TC1100002880.mm.1  | -0.2 | 0.210259 |
| TC0800002599.mm.1 | ENSMUST00000122726 | Gm26026        | predicted gene, 26026                                                    | 14718358  | 14718480  | TC1900001199.mm.1  | -0.2 | 0.210356 |
| TC0800002603.mm.1 | NM_001145209       | Hbs1l          | Hbs1-like (S. cerevisiae)                                                | 21295979  | 21368889  | TC1000000165.mm.1  | -0.1 | 0.210567 |
| TC0800002605.mm.1 | NM_010194          | Fes            | feline sarcoma oncogene                                                  | 80377758  | 80387946  | TC0700003593.mm.1  | 0.1  | 0.21066  |
| TC0800002608.mm.1 | NM_028794          | Nudt9          | nudix (nucleoside diphosphate linked moiety X)-                          | 104046306 | 104065379 | TC0500001017.mm.1  | 0.1  | 0.210672 |
| TC0800002612.mm.1 | NR_030254          | Mir486         | microRNA 486                                                             | 23142555  | 23142682  | TC0800000293.mm.1  | -0.1 | 0.210804 |
| TC0800002617.mm.1 | NM_145501          | Pi4k2a         | phosphatidylinositol 4-kinase type 2 alpha                               | 42090435  | 42122218  | TC1900000609.mm.1  | 0.1  | 0.210859 |
| TC0800002629.mm.1 | ENSMUST00000104639 | Gm23237        | predicted gene, 23237                                                    | 3555465   | 3555556   | TC0300000006.mm.1  | 0.3  | 0.210865 |
| TC0800002630.mm.1 | NM_024172          | Hspbp1         | HSPA (heat shock 70kDa) binding protein, cytopl                          | 4660521   | 4684963   | TC0700002167.mm.1  | -0.1 | 0.21091  |
| TC0800002658.mm.1 | NM_011590          | Timm17a        | translocase of inner mitochondrial membrane 17                           | 135301532 | 135313778 | TC0100003125.mm.1  | 0.2  | 0.210918 |
| TC0800002665.mm.1 | ENSMUST00000083156 | Gm23677        | predicted gene, 23677                                                    | 115591170 | 115591273 | TC0800002990.mm.1  | 0.1  | 0.210943 |
| TC0800002669.mm.1 | ENSMUST00000157269 | Gm25280        | predicted gene, 25280                                                    | 138827476 | 138827476 | TC04000003833.mm.1 | 0.1  | 0.211017 |
| TC0800002670.mm.1 | NM_152821          | Purg           | purine-rich element binding protein G                                    | 33386325  | 33417469  | TC0800000384.mm.1  | -0.1 | 0.211162 |
| TC0800002672.mm.1 | ENSMUST00000157209 | Gm23957        | predicted gene, 23957                                                    | 66370392  | 66370481  | TC0700003435.mm.1  | 0.2  | 0.211213 |
| TC0800002678.mm.1 | NM_023172          | Ndufb9         | NADH dehydrogenase (ubiquinone) 1 beta subcc                             | 58933810  | 58939489  | TC1500000423.mm.1  | 0.4  | 0.21137  |
| TC0800002680.mm.1 | NM_033074          | Tars           | threonyl-tRNA synthetase                                                 | 11383663  | 11399658  | TC1500001214.mm.1  | -0.2 | 0.211435 |
| TC0800002690.mm.1 | ENSMUST00000157481 | Gm22378        | predicted gene, 22378                                                    | 109499714 | 109499824 | TC1100003991.mm.1  | -0.2 | 0.211435 |
| TC0800002696.mm.1 | ENSMUST00000180104 | Gm24508        | predicted gene, 24508                                                    | 84294535  | 84294641  | TC1600000931.mm.1  | -0.7 | 0.211491 |
| TC0800002697.mm.1 | NM_019490          | Uso1           | USO1 vesicle docking factor                                              | 92137938  | 92202795  | TC0500000868.mm.1  | 0.2  | 0.211636 |
| TC0800002700.mm.1 | ENSMUST00000080223 | Rpl21-p        | ribosomal protein L21, pseudogene 3                                      | 59094055  | 59094537  | TC1200001815.mm.1  | -0.5 | 0.211852 |
| TC0800002701.mm.1 | ENSMUST00000158836 | Gm23698        | predicted gene, 23698                                                    | 110796173 | 110796300 | TC1000001283.mm.1  | -0.1 | 0.212066 |
| TC0800002704.mm.1 | ENSMUST00000117011 | Gm25003        | predicted gene, 25003                                                    | 104744670 | 104744759 | TC0100000998.mm.1  | 0.3  | 0.21218  |
| TC0800002721.mm.1 | NM_133716          | Smap2          | stromal membrane-associated GTPase-activating                            | 120968317 | 121017247 | TC0400003448.mm.1  | -0.3 | 0.212268 |
| TC0800002725.mm.1 | NM_028003          | Rpap3          | RNA polymerase II associated protein 3                                   | 97675097  | 97705825  | TC1500002154.mm.1  | -0.1 | 0.212373 |
| TC0800002739.mm.1 | ENSMUST00000083230 | Gm23814        | predicted gene, 23814                                                    | 119793942 | 119794043 | TC0200004448.mm.1  | -0.6 | 0.212393 |
| TC0800002742.mm.1 | NM_026983          | Erp27          | endoplasmic reticulum protein 27                                         | 136907311 | 136922180 | TC0600003336.mm.1  | -0.1 | 0.212484 |
| TC0800002743.mm.1 | NR_028575          | Snord12        | small nucleolar RNA, C/D box 123                                         | 32241845  | 32241932  | TC1500001329.mm.1  | 0.5  | 0.212505 |
| TC0800002744.mm.1 | NM_153414          | Ints9          | integrator complex subunit 9                                             | 64950045  | 65039835  | TC1400000930.mm.1  | -0.2 | 0.212586 |
| TC0800002751.mm.1 | NM_007502          | Atp1b3         | ATPase, Na <sup>+</sup> /K <sup>+</sup> transporting, beta 3 polypeptide | 96332657  | 96364304  | TC0900002875.mm.1  | 0.2  | 0.212837 |
| TC0800002753.mm.1 | NM_199199          | Tmem199        | transmembrane protein 199                                                | 78507055  | 78512172  | TC1100003298.mm.1  | 0.0  | 0.212841 |
| TC0800002760.mm.1 | NM_001205214       | Rxb1           | retinoid X receptor beta                                                 | 34031812  | 34038403  | TC1700000611.mm.1  | -0.1 | 0.213029 |
| TC0800002763.mm.1 | NM_001045524       | AK12934        | cDNA sequence AK129341                                                   | 8076632   | 8134294   | TC0900001726.mm.1  | -0.1 | 0.213133 |
| TC0800002764.mm.1 | NR_029802          | Mir320         | microRNA 320                                                             | 70443510  | 70443591  | TC1400000997.mm.1  | 0.2  | 0.213177 |
| TC0800002782.mm.1 | ENSMUST00000106431 | Gm10959        | predicted gene 10959                                                     | 122913070 | 122919360 | TC0300002867.mm.1  | 0.2  | 0.213229 |
| TC0800002783.mm.1 | NM_008598          | Mgmt           | O-6-methylguanine-DNA methyltransferase                                  | 136894611 | 137128188 | TC0700001974.mm.1  | 0.1  | 0.213339 |
| TC0800002787.mm.1 | ENSMUST00000084006 | Gm23795        | predicted gene, 23795                                                    | 68952100  | 68952236  | TC0700003466.mm.1  | -0.7 | 0.213342 |
| TC0800002790.mm.1 | XR_141007          | Gm19337        | predicted gene, 19337                                                    | 63250932  | 63252515  | TC1000000599.mm.1  | -0.1 | 0.213353 |
| TC0800002797.mm.1 | ENSMUST00000110100 | Gm11035        | predicted gene 11035                                                     | 64979544  | 65014904  | TC1500001642.mm.1  | 0.3  | 0.21336  |
| TC0800002802.mm.1 | ENSMUST00000104449 | Gm22771        | predicted gene, 22771                                                    | 74906109  | 74906199  | TC1100001053.mm.1  | -0.1 | 0.213524 |
| TC0800002804.mm.1 | ENSMUST00000104632 | Gm23235        | predicted gene, 23235                                                    | 15178139  | 15178231  | TC0900000115.mm.1  | 0.3  | 0.213551 |
| TC0800002806.mm.1 | ENSMUST00000093626 | Gm23087        | predicted gene, 23087                                                    | 11350450  | 11350525  | TC0700002326.mm.1  | 0.1  | 0.213721 |
| TC0800002807.mm.1 | NM_181650          | Prdm4          | PR domain containing 4                                                   | 85891966  | 85917142  | TC1000002611.mm.1  | -0.1 | 0.213735 |
| TC0800002808.mm.1 | NM_001168538       | Cdad1          | cytidine and dCMP deaminase domain containin                             | 59559388  | 59597959  | TC1400002165.mm.1  | 0.1  | 0.213829 |
| TC0800002822.mm.1 | NM_007485          | Rhod           | ras homolog gene family, member D                                        | 4425457   | 4439433   | TC1900000921.mm.1  | 0.1  | 0.213862 |
| TC0800002823.mm.1 | NM_008390          | Irf1           | interferon regulatory factor 1                                           | 53770014  | 53778374  | TC1100000614.mm.1  | -0.1 | 0.214074 |
| TC0800002824.mm.1 | NM_016804          | Mtx2           | metaxin 2                                                                | 74825803  | 74878431  | TC0200001102.mm.1  | 0.1  | 0.214359 |
| TC0800002828.mm.1 | NM_013571          | Ksr1           | kinase suppressor of ras 1                                               | 79013440  | 79146407  | TC1100003315.mm.1  | 0.1  | 0.214512 |
| TC0800002830.mm.1 | NM_183149          | Zfp598         | zinc finger protein 598                                                  | 24669752  | 24682016  | TC1700000347.mm.1  | 0.1  | 0.214554 |
| TC0800002831.mm.1 | ENSMUST00000083140 | Gm24535        | predicted gene, 24535                                                    | 21901732  | 21901838  | TC0X00001947.mm.1  | -0.7 | 0.214727 |

|                   |                     |         |                                                 |           |           |                    |      |          |
|-------------------|---------------------|---------|-------------------------------------------------|-----------|-----------|--------------------|------|----------|
| TC0800002842.mm.1 | ENSMUST00000104628  | Gm22735 | predicted gene, 22735                           | 128435255 | 128435347 | TC0500001491.mm.1  | 0.3  | 0.214755 |
| TC0800002844.mm.1 | ENSMUST00000179147  | Gm23191 | predicted gene, 23191                           | 87364040  | 87364146  | TC1000002631.mm.1  | -0.7 | 0.214779 |
| TC0800002848.mm.1 | ENSMUST00000082755  | Gm25815 | predicted gene, 25815                           | 16953395  | 16953501  | TC0700002442.mm.1  | -0.3 | 0.214835 |
| TC0800002850.mm.1 | ENSMUST00000158200  | Gm25223 | predicted gene, 25223                           | 49906771  | 49906880  | TC0200003503.mm.1  | -0.2 | 0.214853 |
| TC0800002854.mm.1 | NM_020577           | As3mt   | arsenic (+3 oxidation state) methyltransferase  | 46707443  | 46741095  | TC1900000709.mm.1  | -0.2 | 0.214983 |
| TC0800002858.mm.1 | NM_001007582        | AY76118 | cDNA sequence AY761184                          | 21702519  | 21703647  | TC0800001851.mm.1  | -0.1 | 0.215287 |
| TC0800002863.mm.1 | ENSMUST00000118660  | Gm12099 | predicted gene 12099                            | 30705152  | 30705091  | TC1100002441.mm.1  | -0.1 | 0.215589 |
| TC0800002869.mm.1 | NM_178605           | Nop16   | NOP16 nucleolar protein                         | 54584185  | 54590090  | TC1300002036.mm.1  | -0.1 | 0.215591 |
| TC0800002872.mm.1 | NM_008553           | Ascl1   | achaete-scute complex homolog 1 (Drosophila)    | 87490819  | 87493660  | TC1000002632.mm.1  | -0.1 | 0.215684 |
| TC0800002875.mm.1 | NM_138586           | Exosc5  | exosome component 5                             | 25659153  | 25668032  | TC0700000421.mm.1  | -0.1 | 0.21569  |
| TC0800002877.mm.1 | ENSMUST00000091481  | Zfp72   | zinc finger protein 72                          | 74371426  | 74376566  | TC1300002321.mm.1  | 0.1  | 0.215725 |
| TC0800002879.mm.1 | NR_002851           | Snord82 | small nucleolar RNA, C/D box 82                 | 86356260  | 86356330  | TC0100002742.mm.1  | -0.3 | 0.215726 |
| TC0800002881.mm.1 | NM_138745           | Mthfd1  | methylene tetrahydrofolate dehydrogenase (NAD   | 76255232  | 76319820  | TC1200000675.mm.1  | -0.2 | 0.215746 |
| TC0800002898.mm.1 | NM_001109747        | Cenpw   | centromere protein W                            | 30194580  | 30200540  | TC1000001941.mm.1  | -0.1 | 0.215783 |
| TC0800002900.mm.1 | NM_178635           | Uvrag   | UV radiation resistance associated gene         | 98886743  | 99141144  | TC0700003790.mm.1  | -0.2 | 0.215865 |
| TC0800002904.mm.1 | NM_008302           | Hsp90ab | heat shock protein 90 alpha (cytosolic), class  | 45567775  | 45573271  | TC1700002151.mm.1  | -0.2 | 0.215886 |
| TC0800002905.mm.1 | ENSMUST00000157210  | Gm24481 | predicted gene, 24481                           | 92949158  | 92949259  | TC0300002416.mm.1  | 0.2  | 0.215897 |
| TC0800002913.mm.1 | ENSMUST00000116795  | Gm25850 | predicted gene, 25850                           | 107605337 | 107605434 | TC0800001279.mm.1  | 0.3  | 0.21613  |
| TC0800002918.mm.1 | ENSMUST00000119086  | Gm13651 | predicted gene 13651                            | 77291331  | 77292440  | TC0200001137.mm.1  | -0.2 | 0.216141 |
| TC0800002922.mm.1 | NM_023596           | Slc29a3 | solute carrier family 29 (nucleoside transporte | 60712072  | 60752794  | TC1000002234.mm.1  | 0.2  | 0.216232 |
| TC0800002927.mm.1 | NM_146467           | Olfr138 | olfactory receptor 1388                         | 49443853  | 49444788  | TC1100000510.mm.1  | 0.1  | 0.216378 |
| TC0800002928.mm.1 | ENSMUST00000175471  | Gm25249 | predicted gene, 25249                           | 64956499  | 64956576  | TC0700003416.mm.1  | 0.2  | 0.216507 |
| TC0800002929.mm.1 | XR_140584           | Gm9916  | predicted gene 9916                             | 118434721 | 118435997 | TC0300001214.mm.1  | -0.1 | 0.216533 |
| TC0800002935.mm.1 | NM_001142322        | Myo9b   | myosin IXb                                      | 71272714  | 71360712  | TC0800000782.mm.1  | -0.2 | 0.216629 |
| TC0800002936.mm.1 | NM_031199           | Tgfa    | transforming growth factor alpha                | 86195251  | 86275449  | TC0600000980.mm.1  | 0.0  | 0.216816 |
| TC0800002937.mm.1 | NM_010501           | Ifit3   | interferon-induced protein with tetratricopepti | 34583529  | 34588982  | TC1900000501.mm.1  | 0.1  | 0.216864 |
| TC0800002945.mm.1 | ENSMUST00000177706  | Gm26178 | predicted gene, 26178                           | 57239007  | 57239113  | TC1500001551.mm.1  | -0.6 | 0.216872 |
| TC0800002947.mm.1 | ENSMUST00000105067  | Gm14193 | predicted gene 14193                            | 99730175  | 99730327  | TC1100001599.mm.1  | -0.2 | 0.216935 |
| TC0800002953.mm.1 | NM_011474           | Spr2h   | small proline-rich protein 2H                   | 92385685  | 92387324  | TC0300000828.mm.1  | -0.1 | 0.217111 |
| TC0800002955.mm.1 | ENSMUST00000175373  | Gm22696 | predicted gene, 22696                           | 77116365  | 77116432  | TC1200001963.mm.1  | 0.2  | 0.217119 |
| TC0800002957.mm.1 | NM_023912           | Scyl1   | SCY1-like 1 (S. cerevisiae)                     | 5758427   | 5771401   | TC1900000983.mm.1  | 0.1  | 0.217167 |
| TC0800002961.mm.1 | NM_001083114        | Pphln1  | periphrilin 1                                   | 93398350  | 93491913  | TC1500000921.mm.1  | -0.2 | 0.217349 |
| TC0800002962.mm.1 | ENSMUST00000094035  | Gm13597 | predicted gene 13597                            | 68554501  | 68555750  | TC0200000988.mm.1  | 0.2  | 0.21751  |
| TC0800002968.mm.1 | ENSMUST00000083947  | Gm22866 | predicted gene, 22866                           | 90351995  | 90352171  | TC0900001160.mm.1  | -0.5 | 0.217513 |
| TC0800002969.mm.1 | ENSMUST00000122739  | n-R5s43 | nuclear encoded rRNA 5S 43                      | 100449684 | 100449793 | TC1500001046.mm.1  | 0.1  | 0.217596 |
| TC0800002983.mm.1 | NM_023056           | Tmem176 | transmembrane protein 176B                      | 48843381  | 48841374  | TC0600002233.mm.1  | 0.3  | 0.217618 |
| TC0800002990.mm.1 | ENSMUST00000082598  | Gm23614 | predicted gene, 23614                           | 122265094 | 122265200 | TC0700001755.mm.1  | -0.5 | 0.217664 |
| TC0800003007.mm.1 | ENSMUST00000178536  | Gm24317 | predicted gene, 24317                           | 15383148  | 15383254  | TC0400000134.mm.1  | -0.5 | 0.217675 |
| TC0800003010.mm.1 | ENSMUST00000158449  | Gm23817 | predicted gene, 23817                           | 80622830  | 80622933  | TC1200002001.mm.1  | -0.1 | 0.217835 |
| TC0800003011.mm.1 | NM_011171           | Procr   | protein C receptor, endothelial                 | 155751117 | 155755478 | TC0200002374.mm.1  | 0.1  | 0.218124 |
| TC0800003015.mm.1 | NM_172549           | Cabin1  | calcineurin binding protein 1                   | 75646110  | 75764357  | TC0000002381.mm.1  | -0.1 | 0.218142 |
| TC0800003017.mm.1 | ENSMUST00000178377  | Rab11b- | RAB11b, member RAS oncogene family, pseudo      | 7398421   | 7399077   | TC1900001044.mm.1  | 0.4  | 0.218259 |
| TC0800003026.mm.1 | ENSMUST00000137730  | Gm16196 | predicted gene 16196                            | 29014642  | 29015897  | TC1700001775.mm.1  | 0.1  | 0.2183   |
| TC0800003037.mm.1 | XR_141217           | Gm10002 | predicted gene 10002                            | 69654835  | 69658661  | TC1400002323.mm.1  | -0.1 | 0.218356 |
| TC0800003045.mm.1 | ENSMUST00000122308  | Gm12443 | predicted gene 12443                            | 46419980  | 46420302  | TC0400002599.mm.1  | -0.2 | 0.218392 |
| TC0800003064.mm.1 | NM_001077638        | Prmt2   | protein arginine N-methyltransferase 2          | 76207222  | 76237865  | TC0500002398.mm.1  | 0.1  | 0.218473 |
| TC0800003069.mm.1 | NM_001142916        | Plod2   | procollagen lysine, 2-oxoglutarate 5-dioxygenas | 92542223  | 92608428  | TC0900001175.mm.1  | -0.1 | 0.218528 |
| TC0800003073.mm.1 | ENSMUST00000179834  | Gm22633 | predicted gene, 22633                           | 12374936  | 12375042  | TC0100000059.mm.1  | -0.8 | 0.218937 |
| TC0800003076.mm.1 | NM_134089           | Scrib   | scribbled homolog (Drosophila)                  | 76047158  | 76069784  | TC1500001760.mm.1  | -0.1 | 0.218938 |
| TC0800003077.mm.1 | ENSMUST000000096145 | Gm10337 | predicted gene 10337                            | 102503722 | 102503886 | TC1500001103.mm.1  | -0.2 | 0.218959 |
| TC0800003088.mm.1 | NM_028037           | Acad10  | acyl-Coenzyme A dehydrogenase family, membe     | 121621026 | 121660514 | TC13000003195.mm.1 | 0.1  | 0.219003 |
| TC0800003104.mm.1 | ENSMUST00000118490  | Gm14519 | predicted gene 14519                            | 15365179  | 15365490  | TC0X00000176.mm.1  | -0.5 | 0.219066 |
| TC0800003105.mm.1 | NCBI_Gene:638634:p  | Ighv1-7 | Ighv1-70 immunoglobulin heavy variable 1-70     | 115691889 | 115692182 | TC1200002648.mm.1  | -0.7 | 0.219165 |
| TC0800003106.mm.1 | NM_026861           | Ubac2   | ubiquitin associated domain containing 2        | 121878606 | 122021035 | TC1400001321.mm.1  | -0.1 | 0.219188 |
| TC0800003107.mm.1 | ENSMUST00000082595  | Gm26437 | predicted gene, 26437                           | 39305377  | 39305481  | TC0X00002094.mm.1  | -0.2 | 0.219248 |
| TC0800003108.mm.1 | NM_011078           | Phf2    | PHD finger protein 2                            | 48801750  | 48870885  | TC1300001949.mm.1  | -0.3 | 0.2193   |
| TC0800003109.mm.1 | NM_001033318        | Cog7    | component of oligomeric golgi complex 7         | 121922839 | 121981711 | TC0700004219.mm.1  | 0.1  | 0.219373 |
| TC0800003110.mm.1 | NM_177596           | Zfp947  | zinc finger protein 947                         | 22144359  | 22166190  | TC1700001570.mm.1  | -0.1 | 0.219386 |
| TC0800003111.mm.1 | ENSMUST00000179192  | Gm13698 | predicted gene 13698                            | 83955693  | 83958185  | TC0200001206.mm.1  | -0.3 | 0.219405 |
| TC0800003112.mm.1 | ENSMUST00000178960  | Gm13693 | predicted gene 13693                            | 83961503  | 83963995  | TC0200001207.mm.1  | -0.3 | 0.219405 |
| TC0800003113.mm.1 | ENSMUST00000180347  | Gm13696 | predicted gene 13696                            | 83973123  | 83975615  | TC0200001209.mm.1  | -0.3 | 0.219405 |
| TC0800003114.mm.1 | ENSMUST00000178533  | Gm13694 | predicted gene 13694                            | 83978933  | 83981425  | TC0200001210.mm.1  | -0.3 | 0.219405 |
| TC0800003115.mm.1 | ENSMUST00000099948  | Gm13697 | predicted gene 13697                            | 83984743  | 83987235  | TC0200001211.mm.1  | -0.3 | 0.219405 |
| TC0800003116.mm.1 | ENSMUST00000104719  | n-R5s19 | nuclear encoded rRNA 5S 194                     | 4338998   | 4339116   | TC0300000011.mm.1  | -0.5 | 0.219599 |
| TC0800003117.mm.1 | NM_145986           | Fam83f  | family with sequence similarity 83, member F    | 80671847  | 80700425  | TC1500000704.mm.1  | -0.1 | 0.219619 |
| TC0800003118.mm.1 | NM_178883           | Gorab   | golgin, RAB6-interacting                        | 163384909 | 163403641 | TC0100003412.mm.1  | -0.1 | 0.219642 |
| TC0800003119.mm.1 | XR_140471           | Gm10521 | predicted gene 10521                            | 171895664 | 171898237 | TC0100001603.mm.1  | 0.1  | 0.21967  |
| TC0800003120.mm.1 | ENSMUST00000111844  | Gm11077 | predicted gene 11077                            | 140729284 | 140756053 | TC0600001659.mm.1  | -0.1 | 0.219764 |
| TC0800003121.mm.1 | NM_001123367        | Gm3448  | predicted gene 3448                             | 14995783  | 15010184  | TC1700002795.mm.1  | 0.1  | 0.219788 |
| TC0800003122.mm.1 | ENSMUST00000180326  | Gm22418 | predicted gene, 22418                           | 107001452 | 107001558 | TC0600001188.mm.1  | -0.6 | 0.219888 |
| TC0800003123.mm.1 | NM_134059           | Ddx41   | DEAD (Asp-Glu-Ala-Asp) box polypeptide 41       | 55530410  | 55536658  | TC1300002063.mm.1  | -0.2 | 0.219945 |
| TC0800003124.mm.1 | NCBI_Gene:10011490  | Trdv4   | T cell receptor delta variable 4                | 54072412  | 54075515  | TC1400000715.mm.1  | -0.1 | 0.220119 |
| TC0800003125.mm.1 | ENSMUST00000117793  | Gm15289 | predicted gene 15289                            | 111361676 | 111361919 | TC1300001249.mm.1  | -0.4 | 0.220152 |
| TC0800003126.mm.1 | ENSMUST00000122498  | Gm26251 | predicted gene, 26251                           | 78603710  | 78603831  | TC1400001090.mm.1  | 0.1  | 0.220276 |
| TC0800003127.mm.1 | ENSMUST00000170469  | Gm3317  | predicted gene 3317                             | 5630281   | 5633028   | TC1400001399.mm.1  | 0.1  | 0.220732 |
| TC0800003128.mm.1 | ENSMUST00000117747  | Gm14060 | predicted gene 14060                            | 138453878 | 138454324 | TC0200004717.mm.1  | 0.4  | 0.220741 |
| TC0800003129.mm.1 | NM_178045           | Rassf4  | Ras association (RalGDS/AF-6) domain family me  | 116633008 | 116673836 | TC0600002978.mm.1  | 0.2  | 0.220757 |
| TC0800003130.mm.1 | ENSMUST00000179268  | Gm26491 | predicted gene, 26491                           | 10475500  | 10475620  | TC0200000108.mm.1  | 0.2  | 0.220788 |

|                   |                    |         |                                                 |           |           |                   |      |          |
|-------------------|--------------------|---------|-------------------------------------------------|-----------|-----------|-------------------|------|----------|
| TC0800003131.mm.1 | ENSMUST00000157938 | Gm23779 | predicted gene, 23779                           | 21486338  | 21486401  | TC1300001543.mm.1 | 0.1  | 0.220941 |
| TC0800003132.mm.1 | NM_183136          | Spink8  | serine peptidase inhibitor, Kazal type 8        | 109812280 | 109826633 | TC0900001440.mm.1 | 0.2  | 0.220996 |
| TC0800003133.mm.1 | NM_013785          | lp6k1   | inositol hexaphosphate kinase 1                 | 108002501 | 108048782 | TC0900003337.mm.1 | -0.1 | 0.221044 |
| TC0800003134.mm.1 | XR_105121          | AU02020 | expressed sequence AU020206                     | 75769039  | 75782099  | TC0700003530.mm.1 | -0.2 | 0.221307 |
| TC0800003135.mm.1 | NM_008142          | Gnb1    | guanine nucleotide binding protein (G protein), | 155491361 | 155559269 | TC0400002077.mm.1 | 0.2  | 0.221349 |
| TC0800003136.mm.1 | ENSMUST00000117335 | Gm11821 | predicted gene 11821                            | 11400346  | 11401324  | TC0400000089.mm.1 | -0.1 | 0.221393 |
| TC0800003137.mm.1 | ENSMUST00000115928 | AC12514 | N/A                                             | 147792    | 149707    | TC1_GL456210_rand | -0.6 | 0.221424 |
| TC0800003138.mm.1 | ENSMUST00000083253 | Gm25136 | predicted gene, 25136                           | 135584192 | 135584306 | TC0600001607.mm.1 | -0.2 | 0.221426 |
| TC0800003139.mm.1 | ENSMUST00000183076 | Gm5345  | predicted gene 5345                             | 40853828  | 40855027  | TC0800002110.mm.1 | -0.1 | 0.221502 |
| TC0800003140.mm.1 | ENSMUST00000104548 | Gm24555 | predicted gene, 24555                           | 83921918  | 83922041  | TC0100000723.mm.1 | 0.2  | 0.221598 |
| TC0800003141.mm.1 | ENSMUST00000077278 | Rpl21-p | ribosomal protein L21, pseudogene 11            | 96666515  | 96666982  | TC0300002524.mm.1 | -0.4 | 0.221714 |
| TC0800003142.mm.1 | XR_105947          | 3222401 | RIKEN cDNA 3222401L13 gene                      | 37655690  | 37659137  | TC1800000380.mm.1 | 0.1  | 0.221814 |
| TC0800003143.mm.1 | ENSMUST00000083860 | Gm25514 | predicted gene, 25514                           | 116968039 | 116968173 | TC0200004393.mm.1 | -0.5 | 0.221882 |
| TC0800003144.mm.1 | NM_001195437       | Gm590   | predicted gene 590                              | 110914739 | 110916861 | TC0900003120.mm.1 | -0.1 | 0.222005 |
| TC0800003145.mm.1 | NM_146405          | Olfr228 | olfactory receptor 228                          | 86482799  | 86483767  | TC0200003942.mm.1 | 0.1  | 0.222081 |
| TC0800003146.mm.1 | NM_010516          | Cyr61   | cysteine rich protein 61                        | 145646971 | 145649985 | TC0300003087.mm.1 | 0.3  | 0.222174 |
| TC0800003147.mm.1 | NM_011827          | Hcst    | hematopoietic cell signal transducer            | 30417712  | 30419854  | TC0700002758.mm.1 | -0.1 | 0.222218 |
| TC0800003148.mm.1 | ENSMUST00000148614 | Gm5125  | predicted gene 5125                             | 102106603 | 102107226 | TC0X00002735.mm.1 | -0.1 | 0.222253 |
| TC0800003149.mm.1 | ENSMUST00000122677 | Gm25985 | predicted gene, 25985                           | 115116127 | 115116233 | TC1300001320.mm.1 | 0.1  | 0.222282 |
| TC0800003150.mm.1 | ENSMUST00000083791 | Gm26165 | predicted gene, 26165                           | 144261589 | 144261726 | TC0200004758.mm.1 | -0.6 | 0.222531 |
| TC0800003151.mm.1 | NM_011908          | Ubl3    | ubiquitin-like 3                                | 148504631 | 148552789 | TC0500003638.mm.1 | 0.2  | 0.222624 |
| TC0800003152.mm.1 | NM_001081288       | Taf2    | TAFF2 RNA polymerase II, TATA box binding prote | 55071529  | 55072152  | TC1500001533.mm.1 | -0.1 | 0.222668 |
| TC0800003153.mm.1 | NM_152804          | Plk2    | polo-like kinase 2                              | 110395044 | 110400844 | TC1300001242.mm.1 | 0.3  | 0.222714 |
| TC0800003154.mm.1 | ENSMUST00000172431 | Gm3512  | predicted gene 3512                             | 7144121   | 7244706   | TC1400002850.mm.1 | 0.1  | 0.222883 |
| TC0800003161.mm.1 | ENSMUST00000184627 | AC13836 | N/A                                             | 8690181   | 8690233   | TC0800000064.mm.1 | -0.1 | 0.222938 |
| TC0800003162.mm.1 | NM_009256          | Serpinb | serine (or cysteine) peptidase inhibitor, clade | 33003250  | 33017957  | TC1300000364.mm.1 | 0.1  | 0.223028 |
| TC0800003164.mm.1 | ENSMUST00000082806 | Gm24706 | predicted gene, 24706                           | 82401091  | 82401227  | TC0X00002544.mm.1 | -0.1 | 0.223134 |
| TC0800003171.mm.1 | NM_009269          | Sptlc1  | serine palmitoyltransferase, long chain base su | 53332716  | 53377365  | TC1300002017.mm.1 | 0.1  | 0.223181 |
| TC0800003172.mm.1 | NM_001142539       | Gm9992  | predicted gene 9992                             | 7363712   | 7385305   | TC1700001400.mm.1 | 0.1  | 0.223196 |
| TC0800003184.mm.1 | ENSMUST00000104783 | Gm26258 | predicted gene, 26258                           | 82976323  | 82976414  | TC1800000877.mm.1 | 0.4  | 0.223257 |
| TC0800003190.mm.1 | ENSMUST00000180301 | Gm23648 | predicted gene, 23648                           | 18727292  | 18727398  | TC0600000148.mm.1 | -0.7 | 0.22336  |
| TC0800003201.mm.1 | NM_027909          | C2cd2l  | C2 calcium-dependent domain containing 2-like   | 44309237  | 44320282  | TC0900002156.mm.1 | 0.1  | 0.223412 |
| TC0800003212.mm.1 | ENSMUST00000104093 | Gm26396 | predicted gene, 26396                           | 94792205  | 94792336  | TC0200004184.mm.1 | 0.1  | 0.223412 |
| TC0800003213.mm.1 | NCBI_Gene:619833:p | Ighv1-6 | immunoglobulin heavy variable 1-69              | 115623161 | 115623595 | TC1200002646.mm.1 | -1.0 | 0.223506 |
| TC0800003217.mm.1 | ENSMUST00000104129 | Gm25785 | predicted gene, 25785                           | 51607544  | 51607668  | TC1800001327.mm.1 | -0.4 | 0.223701 |
| TC0800003221.mm.1 | ENSMUST00000104454 | Gm24984 | predicted gene, 24984                           | 72527550  | 72527682  | TC1000000692.mm.1 | 0.1  | 0.223792 |
| TC0800003228.mm.1 | XM_001477137       | Gm3552  | predicted gene 3552                             | 48695517  | 48732770  | TC1400001950.mm.1 | -0.1 | 0.223812 |
| TC0800003231.mm.1 | ENSMUST00000082578 | Gm22456 | predicted gene, 22456                           | 94919709  | 94919833  | TC1100001447.mm.1 | -0.3 | 0.22384  |
| TC0800003244.mm.1 | NM_001163751       | Spsb3   | splA/ryanodine receptor domain and SOCS box c   | 24886643  | 24892152  | TC1700000356.mm.1 | -0.1 | 0.22385  |
| TC0800003245.mm.1 | NM_028260          | Immp1l  | IMP1 inner mitochondrial membrane peptidase-    | 105904638 | 105965558 | TC0200001586.mm.1 | -0.2 | 0.223886 |
| TC0900000002.mm.1 | NM_172570          | Trim47  | tripartite motif-containing 47                  | 116105750 | 116110246 | TC1100004301.mm.1 | 0.1  | 0.224013 |
| TC0900000003.mm.1 | NM_177075          | Fndc9   | fibronectin type III domain containing 9        | 46235531  | 46239872  | TC1100000469.mm.1 | -0.1 | 0.224033 |
| TC0900000004.mm.1 | XR_105872          | Gm19773 | predicted gene, 19773                           | 86970372  | 86974882  | TC1700001304.mm.1 | 0.2  | 0.224149 |
| TC0900000005.mm.1 | NM_207147          | Olfr813 | olfactory receptor 813                          | 129856520 | 129857452 | TC1000001656.mm.1 | 0.1  | 0.224177 |
| TC0900000006.mm.1 | ENSMUST00000116888 | Gm25541 | predicted gene, 25541                           | 27539805  | 27539930  | TC0200003219.mm.1 | -0.5 | 0.224448 |
| TC0900000007.mm.1 | NM_145500          | Ubtcl1  | ubiquitin domain containing 1                   | 41981763  | 42034643  | TC1900000604.mm.1 | 0.1  | 0.2245   |
| TC0900000008.mm.1 | ENSMUST00000172151 | Gm8046  | predicted gene 8046                             | 43635674  | 43638776  | TC1400000444.mm.1 | -0.1 | 0.224527 |
| TC0900000014.mm.1 | NM_178919          | Lmf2    | lipase maturation factor 2                      | 89351004  | 89355659  | TC1500002050.mm.1 | 0.2  | 0.224537 |
| TC0900000016.mm.1 | ENSMUST00000104959 | Cdk2ap1 | CDK2 (cyclin-dependent kinase 2)-associated pro | 48825346  | 48826655  | TC1100002638.mm.1 | -0.1 | 0.224577 |
| TC0900000025.mm.1 | NM_010390          | H2-Q1   | histocompatibility 2, Q region locus 1          | 35320405  | 35325099  | TC1700002791.mm.1 | -0.1 | 0.224645 |
| TC0900000031.mm.1 | ENSMUST00000101982 | Gm24423 | predicted gene, 24423                           | 21548060  | 21548165  | TC0800001847.mm.1 | 0.1  | 0.224898 |
| TC0900000033.mm.1 | NM_212449          | AU01982 | expressed sequence AU019823                     | 50605240  | 50617464  | TC0900002272.mm.1 | -0.1 | 0.22497  |
| TC0900000035.mm.1 | ENSMUST00000179533 | Gm26366 | predicted gene, 26366                           | 59486818  | 59486896  | TC0700003203.mm.1 | -0.1 | 0.225015 |
| TC0900000040.mm.1 | uc029sxx.1         | LOC4328 | non-coding RNA, oocyte_clustered_small_RNA4.    | 48541237  | 50335509  | TC1600000695.mm.1 | 0.4  | 0.225031 |
| TC0900000054.mm.1 | ENSMUST00000083725 | Gm23103 | predicted gene, 23103                           | 29737318  | 29737424  | TC0700002728.mm.1 | -0.7 | 0.225092 |
| TC0900000055.mm.1 | NM_019924          | Rps6ka4 | ribosomal protein S6 kinase, polypeptide 4      | 6829084   | 6840627   | TC1900001017.mm.1 | 0.0  | 0.225139 |
| TC0900000069.mm.1 | NCBI_Gene:243453:p | Igkv4-8 | immunoglobulin kappa variable 4-81              | 68990758  | 68991294  | TC0600003553.mm.1 | -0.4 | 0.225246 |
| TC0900000075.mm.1 | NM_009777          | C1qb    | complement component 1, q subcomponent, be      | 136880129 | 136886187 | TC0400003792.mm.1 | 0.5  | 0.2253   |
| TC0900000082.mm.1 | NM_177256          | Prdx6b  | peroxiredoxin 6B                                | 80292470  | 80295358  | TC0200001170.mm.1 | 0.1  | 0.225329 |
| TC0900000086.mm.1 | NM_007910          | EfnA4   | efrin A4                                        | 89333390  | 89338028  | TC0800002347.mm.1 | -0.1 | 0.225459 |
| TC0900000111.mm.1 | NM_001135112       | Dnaja3  | DnaJ (Hsp40) homolog, subfamily A, member 3     | 4684070   | 4707695   | TC1600002169.mm.1 | 0.1  | 0.225588 |
| TC0900000115.mm.1 | ENSMUST00000178101 | Gm23729 | predicted gene, 23729                           | 29732942  | 29733036  | TC1300000321.mm.1 | 0.2  | 0.225668 |
| TC0900000118.mm.1 | NM_011113          | Plaur   | plasminogen activator, urokinase receptor       | 24462500  | 24475873  | TC0700000383.mm.1 | 0.1  | 0.225717 |
| TC0900000119.mm.1 | ENSMUST00000122762 | Gm24629 | predicted gene, 24629                           | 105203993 | 105204081 | TC0800001206.mm.1 | 0.1  | 0.225885 |
| TC0900000124.mm.1 | NM_027103          | 1700030 | RIKEN cDNA 1700030J22 gene                      | 116969599 | 116978959 | TC1600003007.mm.1 | -0.1 | 0.22591  |
| TC0900000131.mm.1 | NM_025326          | Tmem176 | transmembrane protein 176A                      | 48841483  | 48845858  | TC0600000570.mm.1 | 0.2  | 0.22592  |
| TC0900000132.mm.1 | NM_001111272       | Stau2   | staufen (RNA binding protein) homolog 2 (Droso  | 16228674  | 16520112  | TC0100001999.mm.1 | 0.1  | 0.225949 |
| TC0900000133.mm.1 | ENSMUST00000179063 | Gm13443 | predicted gene 13443                            | 35340361  | 35341316  | TC0200000638.mm.1 | 0.3  | 0.226092 |
| TC0900000134.mm.1 | ENSMUST00000117047 | Gm12165 | predicted gene 12165                            | 46036440  | 46036781  | TC1100000463.mm.1 | -0.1 | 0.226182 |
| TC0900000135.mm.1 | NM_001199270       | Aldoart | aldolase 1 A, retrogene 1                       | 72850583  | 72852634  | TC0800002855.mm.1 | 0.2  | 0.226341 |
| TC0900000138.mm.1 | NR_038122          | Elmo1   | engulfment and cell motility 1                  | 20090507  | 20608356  | TC1300000148.mm.1 | -0.3 | 0.226528 |
| TC0900000146.mm.1 | ENSMUST00000081668 | Rpl21-p | ribosomal protein L21, pseudogene 12            | 90844978  | 90845460  | TC0600002721.mm.1 | -0.5 | 0.226557 |
| TC0900000149.mm.1 | NCBI_Gene:668544:p | Ighv1-6 | Ighv1-62-1 immunoglobulin heavy variable 1-62-  | 115386707 | 115386988 | TC1200002639.mm.1 | -0.7 | 0.226587 |
| TC0900000159.mm.1 | NM_001081433       | Ankrd44 | ankyrin repeat domain 44                        | 54645340  | 54926387  | TC0100002350.mm.1 | -0.2 | 0.226596 |
| TC0900000162.mm.1 | ENSMUST00000104624 | Gm22734 | predicted gene, 22734                           | 92402197  | 92402280  | TC0700003737.mm.1 | 0.3  | 0.226616 |
| TC0900000170.mm.1 | NM_001199059       | Rabgef1 | RAB guanine nucleotide exchange factor (GEF) 1  | 130171798 | 130214342 | TC0500001526.mm.1 | 0.1  | 0.226627 |
| TC0900000177.mm.1 | NCBI_Gene:434034:p | Igkv4-9 | immunoglobulin kappa chain variable 4-90        | 68807180  | 68807708  | TC0600003548.mm.1 | -0.3 | 0.226699 |
| TC0900000183.mm.1 | ENSMUST00000179599 | Gm12183 | predicted gene 12183                            | 48751760  | 48753770  | TC1100002631.mm.1 | -0.4 | 0.226834 |

|                   |                        |          |                                                 |           |           |                   |      |          |
|-------------------|------------------------|----------|-------------------------------------------------|-----------|-----------|-------------------|------|----------|
| TC0900000184.mm.1 | ENSMUST00000157977     | Gm24191  | predicted gene, 24191                           | 106669999 | 106670120 | TC0500001063.mm.1 | -0.1 | 0.226908 |
| TC0900000191.mm.1 | NM_009796              | Capn7    | calpain 7                                       | 31336638  | 31371986  | TC1400000327.mm.1 | -0.1 | 0.227132 |
| TC0900000196.mm.1 | ENSMUST00000178423     | Gm25670  | predicted gene, 25670                           | 110597722 | 110597722 | TC1400002688.mm.1 | -0.7 | 0.227167 |
| TC0900000199.mm.1 | ENSMUST00000169818     | Gm17606  | predicted gene, 17606                           | 54640952  | 54648293  | TC1400000755.mm.1 | -0.2 | 0.227245 |
| TC0900000202.mm.1 | NM_001081687           | Gm5150   | predicted gene 5150                             | 15948070  | 16006332  | TC0300003226.mm.1 | 0.1  | 0.227401 |
| TC0900000203.mm.1 | ENSMUST00000157559     | Gm23137  | predicted gene, 23137                           | 87444474  | 87444580  | TC1100003479.mm.1 | -0.7 | 0.227446 |
| TC0900000204.mm.1 | NM_153548              | E430025  | RIKEN cDNA E430025E21 gene                      | 59331997  | 59374167  | TC1500001596.mm.1 | 0.2  | 0.227554 |
| TC0900000210.mm.1 | NM_001033978           | H2-Eb2   | histocompatibility 2, class II antigen E beta2  | 34325665  | 34341410  | TC1700000628.mm.1 | -0.4 | 0.227901 |
| TC0900000214.mm.1 | NCBI_Gene:668421:p     | Ighv14-  | immunoglobulin heavy variable 14-2              | 113994469 | 113994898 | TC1200002580.mm.1 | -0.7 | 0.228014 |
| TC0900000216.mm.1 | NM_172121              | Zc3h3    | zinc finger CCCH type containing 3              | 75754432  | 75841915  | TC1500001744.mm.1 | 0.0  | 0.228017 |
| TC0900000223.mm.1 | NM_020583              | Isg20    | interferon-stimulated protein                   | 78913424  | 78920396  | TC0700001116.mm.1 | -0.1 | 0.228132 |
| TC0900000234.mm.1 | NM_010833              | Msn      | moesin                                          | 96096042  | 96168553  | TC0X00000916.mm.1 | 0.2  | 0.228209 |
| TC0900000240.mm.1 | NM_010302              | Gna12    | guanine nucleotide binding protein, alpha 12    | 140758408 | 140830431 | TC0500003516.mm.1 | 0.2  | 0.22822  |
| TC0900000244.mm.1 | NM_001135568           | 1190007  | RIKEN cDNA 1190007I07 gene                      | 82619851  | 82623228  | TC1000002570.mm.1 | -0.1 | 0.228298 |
| TC0900000247.mm.1 | NM_008349              | Il10rb   | interleukin 10 receptor, beta                   | 91406164  | 91425834  | TC1600002173.mm.1 | 0.2  | 0.228382 |
| TC0900000254.mm.1 | NM_010361              | Gstt2    | glutathione S-transferase, theta 2              | 75831845  | 75834881  | TC1000002385.mm.1 | 0.2  | 0.228386 |
| TC0900000255.mm.1 | ENSMUST00000179942     | Gm26180  | predicted gene, 26180                           | 89821340  | 89821446  | TC1000002662.mm.1 | -0.7 | 0.228411 |
| TC0900000271.mm.1 | ENSMUST0000083298      | Gm22973  | predicted gene, 22973                           | 59040335  | 59040525  | TC1200000499.mm.1 | -0.6 | 0.228428 |
| TC0900000274.mm.1 | NM_013664              | Sh3gl1   | SH3-domain GRB2-like 1                          | 56016750  | 56036637  | TC1700002311.mm.1 | -0.1 | 0.228861 |
| TC0900000279.mm.1 | NM_020289              | Olfir544 | olfactory receptor 544                          | 102484114 | 102488307 | TC0700003860.mm.1 | 0.1  | 0.228972 |
| TC0900000289.mm.1 | ENSMUST00000175608     | Gm26120  | predicted gene, 26120                           | 89534871  | 89534975  | TC1300002390.mm.1 | 0.1  | 0.228994 |
| TC0900000291.mm.1 | NM_176933              | Dusp4    | dual specificity phosphatase 4                  | 34807297  | 34819894  | TC0800000416.mm.1 | 0.1  | 0.229901 |
| TC0900000307.mm.1 | NM_026276              | Aasdhpp  | aminoadipate-semialdehyde dehydrogenase-phc     | 4294793   | 4309494   | TC0900001692.mm.1 | 0.1  | 0.229025 |
| TC0900000309.mm.1 | XM_001473924           | Gm10051  | predicted pseudogene 10051                      | 133475091 | 133475647 | TC0500001544.mm.1 | -0.4 | 0.229106 |
| TC0900000325.mm.1 | ENSMUST00000183977     | Pinc     | Pregnancy induced noncoding RNA                 | 73392246  | 73392399  | TC0100000617.mm.1 | 0.1  | 0.229171 |
| TC0900000329.mm.1 | ENSMUST00000108963     | LOC1000  | zinc finger protein 120-like                    | 177264654 | 177267036 | TC0200005363.mm.1 | 0.3  | 0.22923  |
| TC0900000336.mm.1 | ENSMUST00000157111     | Gm24648  | predicted gene, 24648                           | 87053694  | 87053825  | TC1700002682.mm.1 | -0.1 | 0.229416 |
| TC0900000338.mm.1 | ENSMUST00000121608     | 4930595  | RIKEN cDNA 4930595D18 gene                      | 111159850 | 111184491 | TC1200002401.mm.1 | 0.1  | 0.229459 |
| TC0900000344.mm.1 | ENSMUST00000116876     | Mir466j  | microRNA 466j                                   | 60960723  | 60960844  | TC1000000556.mm.1 | 0.3  | 0.229628 |
| TC0900000345.mm.1 | NM_028863              | Isca2    | iron-sulfur cluster assembly 2 homolog (S. cere | 84773270  | 84775089  | TC1200000819.mm.1 | 0.1  | 0.229702 |
| TC0900000346.mm.1 | ENSMUST00000074615     | Gm5426   | predicted pseudogene 5426                       | 96136603  | 96136914  | TC1000001174.mm.1 | -0.2 | 0.229733 |
| TC0900000354.mm.1 | ENSMUST00000175360     | Gm25533  | predicted gene, 25533                           | 61673829  | 61673907  | TC0700003366.mm.1 | 0.3  | 0.229766 |
| TC0900000358.mm.1 | ENSMUST00000118685     | Gm13172  | predicted gene 13172                            | 152677748 | 152678003 | TC0400004099.mm.1 | -0.1 | 0.22982  |
| TC0900000360.mm.1 | NM_001199331           | Gm20822  | predicted gene, 20822                           | 11197162  | 11197848  | TC0Y00000266.mm.1 | 0.1  | 0.230005 |
| TC0900000365.mm.1 | NM_001199331           | Gm20822  | predicted gene, 20822                           | 15882559  | 15883245  | TC0Y00000274.mm.1 | 0.1  | 0.230005 |
| TC0900000370.mm.1 | NM_172518              | Fbxo42   | F-box protein 42                                | 141147913 | 141204062 | TC0400001780.mm.1 | -0.2 | 0.230081 |
| TC0900000371.mm.1 | ENSMUST00000059329     | Gm17449  | predicted gene, 17449                           | 66851847  | 66852017  | TC1300002234.mm.1 | -0.2 | 0.230085 |
| TC0900000372.mm.1 | ENSMUST0000082698      | Gm25142  | predicted gene, 25142                           | 5251850   | 5251956   | TC1100000065.mm.1 | -0.6 | 0.230126 |
| TC0900000383.mm.1 | NM_028121              | Adpgk    | ADP-dependent glucokinase                       | 59291572  | 59316200  | TC0900000746.mm.1 | 0.1  | 0.230265 |
| TC0900000388.mm.1 | ENSMUST0000083964      | Gm24522  | predicted gene, 24522                           | 128700546 | 128700653 | TC0X00001251.mm.1 | -0.5 | 0.230594 |
| TC0900000403.mm.1 | NM_010661              | Krt12    | keratin 12                                      | 99415664  | 99422259  | TC1100003707.mm.1 | -0.1 | 0.230596 |
| TC0900000405.mm.1 | NR_035475              | Mir669m  | microRNA 669m-2                                 | 77164403  | 77475936  | TC0X00002497.mm.1 | 0.3  | 0.230654 |
| TC0900000415.mm.1 | NM_026748              | Ints1    | integrator complex subunit 1                    | 139751282 | 139775678 | TC0500003497.mm.1 | -0.1 | 0.230903 |
| TC0900000423.mm.1 | NM_026377              | Sfr1     | SWI5 dependent recombination repair 1           | 47731756  | 47735588  | TC1900000725.mm.1 | 0.3  | 0.231063 |
| TC0900000424.mm.1 | NM_020262              | Zfp109   | zinc finger protein 109                         | 24227795  | 24237598  | TC0700002593.mm.1 | -0.1 | 0.231298 |
| TC0900000430.mm.1 | NM_013651              | Sf3a2    | splicing factor 3a, subunit 2                   | 80798198  | 80804924  | TC1000000871.mm.1 | -0.2 | 0.231327 |
| TC0900000438.mm.1 | NR_035420              | Mir467f  | microRNA 467f                                   | 52822108  | 52902647  | TC1800001336.mm.1 | 0.5  | 0.231366 |
| TC0900000461.mm.1 | ENSMUST00000122262     | Gm6298   | predicted gene 6298                             | 140084480 | 140085460 | TC0X00003070.mm.1 | -0.1 | 0.23155  |
| TC0900000470.mm.1 | NM_025417              | Comm4    | COMM domain containing 4                        | 57155039  | 57158299  | TC0900002366.mm.1 | -0.2 | 0.231698 |
| TC0900000492.mm.1 | NCBI_Gene:629915:p     | Ighv1-4  | immunoglobulin heavy variable 1-47              | 114991108 | 114991401 | TC1200002626.mm.1 | -0.4 | 0.231705 |
| TC0900000500.mm.1 | NM_027481              | Supg1    | SURP and G patch domain containing 1            | 70042813  | 70071957  | TC0800000732.mm.1 | -0.2 | 0.231778 |
| TC0900000503.mm.1 | NM_178071              | Nme7     | NME/NM23 family member 7                        | 164307301 | 164437300 | TC0100001502.mm.1 | -0.1 | 0.232051 |
| TC0900000504.mm.1 | ENSMUST00000103877     | Gm25040  | predicted gene, 25040                           | 118852723 | 118852788 | TC1100004167.mm.1 | 0.3  | 0.232085 |
| TC0900000505.mm.1 | ENSMUST00000180099     | Gm24565  | predicted gene, 24565                           | 97730439  | 97730545  | TC0600001134.mm.1 | -0.7 | 0.232122 |
| TC0900000509.mm.1 | NR_002842 // NR_028310 | Rnu3a    | U3A small nuclear RNA // U3A small nuclear RN   | 0         | 0         | TSUnmapped0000018 | -0.7 | 0.232215 |
| TC0900000511.mm.1 | NM_175134              | 4930503  | eukaryotic translation initiation factor 3, sub | 124469074 | 124524488 | TC1000001526.mm.1 | -0.1 | 0.232391 |
| TC0900000512.mm.1 | ENSMUST0000082984      | Ankrd46  | ankyrin repeat domain 46                        | 36477668  | 36496791  | TC1500001376.mm.1 | 0.1  | 0.232411 |
| TC0900000529.mm.1 | ENSMUST00000184836     | Gm22571  | predicted gene, 22571                           | 64175873  | 64175942  | TC0900000813.mm.1 | -0.2 | 0.232601 |
| TC0900000532.mm.1 | ENSMUST00000158646     | AC15358  | N/A                                             | 122200137 | 122200246 | TC0600001377.mm.1 | 0.2  | 0.232729 |
| TC0900000533.mm.1 | ENSMUST00000104387     | Gm24888  | predicted gene, 24888                           | 109521280 | 109521409 | TC0700001613.mm.1 | -0.9 | 0.232822 |
| TC0900000541.mm.1 | NM_053272              | Dhcr24   | 24-dehydrocholesterol reductase                 | 106561038 | 106589113 | TC0400001107.mm.1 | -0.2 | 0.232926 |
| TC0900000559.mm.1 | NM_021557              | Rdh11    | retinol dehydrogenase 11                        | 79174335  | 79192293  | TC1200001981.mm.1 | -0.2 | 0.233045 |
| TC0900000566.mm.1 | NM_018736              | Mre11a   | meiotic recombination 11 homolog A (S. cerevisi | 14784654  | 14837123  | TC0900000111.mm.1 | -0.1 | 0.233059 |
| TC0900000586.mm.1 | NM_013757              | Syt14    | synaptotagmin-like 4                            | 133936385 | 133981812 | TC0X00002985.mm.1 | 0.1  | 0.233106 |
| TC0900000589.mm.1 | NM_015783              | Isg15    | ISG15 ubiquitin-like modifier                   | 156199424 | 156200818 | TC0400004171.mm.1 | -0.1 | 0.233261 |
| TC0900000590.mm.1 | NM_009884              | Cebpg    | CCAAT/enhancer binding protein (C/EBP), gamm    | 35046422  | 35056566  | TC0700002842.mm.1 | 0.1  | 0.23341  |
| TC0900000598.mm.1 | NM_028959              | Cep72    | centrosomal protein 72                          | 74036495  | 74062285  | TC1300002311.mm.1 | -0.1 | 0.233439 |
| TC0900000601.mm.1 | NM_009876              | Cdkn1c   | cyclin-dependent kinase inhibitor 1C (P57)      | 143458339 | 143461050 | TC0700004585.mm.1 | 0.1  | 0.233525 |
| TC0900000611.mm.1 | ENSMUST00000104215     | Gm25419  | predicted gene, 25419                           | 55299655  | 55299845  | TC0400002683.mm.1 | -0.4 | 0.233652 |
| TC0900000615.mm.1 | NM_181596              | Retnlg   | resistin like gamma                             | 48872608  | 48874498  | TC1600000699.mm.1 | 0.2  | 0.23407  |
| TC0900000630.mm.1 | NM_001005847           | Aga      | aspartylglucosaminidase                         | 53511702  | 53523422  | TC0800000585.mm.1 | 0.1  | 0.234098 |
| TC0900000634.mm.1 | NM_013638              | Prm3     | protamine 3                                     | 10790505  | 10790914  | TC1600001200.mm.1 | -0.1 | 0.234141 |
| TC0900000645.mm.1 | ENSMUST00000158343     | Gm22113  | predicted gene, 22113                           | 7246709   | 7246812   | TC1900000132.mm.1 | -0.5 | 0.23421  |
| TC0900000647.mm.1 | NM_017404              | Mirp139  | mitochondrial ribosomal protein L39             | 84717576  | 84735742  | TC1600001961.mm.1 | -0.1 | 0.234257 |
| TC0900000648.mm.1 | ENSMUST00000171257     | Gm9894   | predicted gene 9894                             | 67763798  | 67773629  | TC1300002261.mm.1 | -0.1 | 0.23428  |
| TC0900000649.mm.1 | ENSMUST00000158287     | Gm22610  | predicted gene, 22610                           | 123095384 | 123095443 | TC0100001105.mm.1 | 0.2  | 0.234529 |
| TC0900000660.mm.1 | ENSMUST00000158820     | Gm22530  | predicted gene, 22530                           | 81806791  | 81806908  | TC0600000899.mm.1 | -0.1 | 0.234618 |

|                   |                    |             |                                                 |           |           |                   |      |          |
|-------------------|--------------------|-------------|-------------------------------------------------|-----------|-----------|-------------------|------|----------|
| TC0900000686.mm.1 | NM_011066          | Per2        | period circadian clock 2                        | 91415982  | 91459330  | TC0100002801.mm.1 | 0.1  | 0.234697 |
| TC0900000689.mm.1 | ENSMUST00000082919 | Gm23442     | predicted gene, 23442                           | 35162563  | 35162696  | TC1700001951.mm.1 | -0.3 | 0.234737 |
| TC0900000690.mm.1 | NM_007429          | Agtr2       | angiotensin II receptor, type 2                 | 21484544  | 21489164  | TC0X00000226.mm.1 | 0.1  | 0.234906 |
| TC0900000700.mm.1 | NM_181403          | Vps37c      | vacuolar protein sorting 37C (yeast)            | 10688735  | 10714419  | TC1900000208.mm.1 | 0.1  | 0.234941 |
| TC0900000702.mm.1 | NR_028559          | Snord11     | small nucleolar RNA, C/D box 111                | 110838528 | 110838616 | TC0800002928.mm.1 | -0.6 | 0.235087 |
| TC0900000705.mm.1 | NM_025332          | Gtpbp8      | GTP-binding protein 8 (putative)                | 44736768  | 44746363  | TC1600001648.mm.1 | 0.1  | 0.235106 |
| TC0900000709.mm.1 | NM_001164426       | Kcnk13      | potassium channel, subfamily K, member 13       | 99964499  | 100062682 | TC1200000989.mm.1 | -0.1 | 0.235324 |
| TC0900000711.mm.1 | ENSMUST00000181450 | 4921514 --- |                                                 | 141115660 | 141118087 | TC0400001779.mm.1 | -0.1 | 0.235366 |
| TC0900000714.mm.1 | ENSMUST00000155376 | Gm16354     | predicted gene 16354                            | 175023354 | 175023503 | TC0200005327.mm.1 | 0.4  | 0.235502 |
| TC0900000719.mm.1 | NM_177472          | Slx4        | SLX4 structure-specific endonuclease subunit ho | 3979105   | 4003770   | TC1600001112.mm.1 | -0.1 | 0.235678 |
| TC0900000730.mm.1 | NCBI_Gene:243431:p | Igkv9-1     | immunoglobulin kappa chain variable 9-124       | 67942074  | 67942540  | TC0600003542.mm.1 | -0.6 | 0.23572  |
| TC0900000746.mm.1 | ENSMUST00000083399 | Gm24928     | predicted gene, 24928                           | 25702642  | 25702748  | TC1600001411.mm.1 | -0.7 | 0.235794 |
| TC0900000748.mm.1 | ENSMUST00000179144 | Gm25450     | predicted gene, 25450                           | 109076136 | 109076242 | TC0700004069.mm.1 | -0.7 | 0.235823 |
| TC0900000750.mm.1 | ENSMUST00000184201 | AC10273     | N/A                                             | 153313713 | 153313824 | TC0300001540.mm.1 | -0.1 | 0.235825 |
| TC0900000763.mm.1 | NM_025854          | Cir1        | corepressor interacting with RBPJ, 1            | 73283105  | 73312701  | TC0200003752.mm.1 | -0.2 | 0.235865 |
| TC0900000769.mm.1 | NCBI_Gene:636260:p | Ighv9-4     | Ighv9-4 immunoglobulin heavy variable 9-4       | 114299961 | 114300254 | TC1200002591.mm.1 | -0.5 | 0.235911 |
| TC0900000776.mm.1 | NM_001024731       | Gm20939     | predicted gene, 20939                           | 94864918  | 94878321  | TC1700001345.mm.1 | -0.1 | 0.235971 |
| TC0900000781.mm.1 | NM_009075          | Rpia        | ribose 5-phosphate isomerase A                  | 70765720  | 70792232  | TC0600002452.mm.1 | -0.1 | 0.236272 |
| TC0900000795.mm.1 | NM_001081151       | Gan         | giant axonal neuropathy                         | 117158135 | 117205834 | TC0800001398.mm.1 | 0.0  | 0.236379 |
| TC0900000797.mm.1 | NM_016859          | Bysl        | bystin-like                                     | 47599331  | 47611492  | TC1700002208.mm.1 | -0.2 | 0.236502 |
| TC0900000802.mm.1 | NM_013699          | Ubp1        | upstream binding protein 1                      | 113930934 | 113977202 | TC0900001507.mm.1 | -0.1 | 0.236683 |
| TC0900000804.mm.1 | ENSMUST00000179060 | n-R5s10     | nuclear encoded rRNA 5S 106                     | 123548956 | 123549074 | TC0800003110.mm.1 | -0.4 | 0.236831 |
| TC0900000810.mm.1 | ENSMUST00000179887 | n-R5s11     | nuclear encoded rRNA 5S 118                     | 123569328 | 123569446 | TC0800003122.mm.1 | -0.4 | 0.236831 |
| TC0900000811.mm.1 | ENSMUST00000178677 | Gm24312     | predicted gene, 24312                           | 123582850 | 123582968 | TC0800003130.mm.1 | -0.4 | 0.236831 |
| TC0900000812.mm.1 | ENSMUST00000178128 | n-R5s13     | nuclear encoded rRNA 5S 130                     | 123589654 | 123589772 | TC0800003134.mm.1 | -0.4 | 0.236831 |
| TC0900000813.mm.1 | ENSMUST00000116868 | Gm22193     | predicted gene, 22193                           | 110842383 | 110842458 | TC0800002929.mm.1 | -0.3 | 0.236856 |
| TC0900000814.mm.1 | XM_003688809       | Gm21698     | predicted gene, 21698                           | 25988150  | 25988579  | TC0500002118.mm.1 | -0.1 | 0.236887 |
| TC0900000815.mm.1 | ENSMUST00000122165 | Gm11895     | predicted gene 11895                            | 25867989  | 25868455  | TC0400002328.mm.1 | -0.1 | 0.236977 |
| TC0900000817.mm.1 | NM_011414          | Slpi        | secretory leukocyte peptidase inhibitor         | 164354070 | 164389095 | TC0200005112.mm.1 | 0.1  | 0.237017 |
| TC0900000818.mm.1 | ENSMUST00000104191 | Gm25170     | predicted gene, 25170                           | 130915299 | 130915427 | TC0X00002968.mm.1 | 0.1  | 0.237031 |
| TC0900000819.mm.1 | ENSMUST00000099666 | Gm10799     | predicted gene 10799                            | 104068047 | 104068550 | TC0200004236.mm.1 | 0.1  | 0.237153 |
| TC0900000820.mm.1 | ENSMUST00000158999 | Gm25444     | predicted gene, 25444                           | 14628619  | 14628731  | TC1300001480.mm.1 | 0.1  | 0.237172 |
| TC0900000826.mm.1 | NM_008259          | Foxa1       | forkhead box A1                                 | 57540631  | 57546121  | TC1200001803.mm.1 | -0.3 | 0.237219 |
| TC0900000833.mm.1 | ENSMUST00000170205 | LOC1010     | protein transport protein Sec61 subunit beta-li | 98489348  | 98492001  | TC1300002503.mm.1 | -0.1 | 0.237226 |
| TC0900000834.mm.1 | ENSMUST00000120192 | Gm9115      | predicted gene 9115                             | 102724402 | 102725749 | TC0X00002757.mm.1 | -0.2 | 0.237835 |
| TC0900000842.mm.1 | NM_029278          | Nop14       | NOP14 nucleolar protein                         | 34638532  | 34660148  | TC0500002240.mm.1 | -0.2 | 0.237841 |
| TC0900000844.mm.1 | NM_001003667       | Krt77       | keratin 77                                      | 101858732 | 101869705 | TC1500002276.mm.1 | -0.1 | 0.238066 |
| TC0900000845.mm.1 | ENSMUST00000122560 | Gm24517     | predicted gene, 24517                           | 134280885 | 134280991 | TC0100003106.mm.1 | -0.4 | 0.238147 |
| TC0900000848.mm.1 | ENSMUST00000115902 | AC08755     | N/A                                             | 26214     | 60779     | TC4_GL456350_rand | 0.1  | 0.238397 |
| TC0900000852.mm.1 | NM_025341          | Abhd6       | abhydrolase domain containing 6                 | 8002902   | 8056555   | TC1400000072.mm.1 | 0.2  | 0.238493 |
| TC0900000853.mm.1 | NM_001033326       | Dhrsx       | dehydrogenase/reductase (SDR family) X chromo   | 15881     | 36213     | TC4_GL456216_rand | 0.0  | 0.238622 |
| TC0900000856.mm.1 | ENSMUST00000119539 | Gm14234     | predicted gene 14234                            | 168417730 | 168418574 | TC0200005217.mm.1 | -0.1 | 0.23902  |
| TC0900000862.mm.1 | XR_105488          | Spanxn4     | SPANX family, member N4                         | 62687804  | 62688324  | TC1200000516.mm.1 | 0.1  | 0.239159 |
| TC0900000863.mm.1 | ENSMUST00000121389 | Gm11662     | predicted gene 11662                            | 104679105 | 104680655 | TC1100003902.mm.1 | -0.1 | 0.239196 |
| TC0900000890.mm.1 | NR_037275          | Mir3092     | microRNA 3092                                   | 27584900  | 27584995  | TC0300001763.mm.1 | 0.1  | 0.239621 |
| TC0900000920.mm.1 | ENSMUST00000115149 | Tm4s19      | transmembrane 4 L six family member 19          | 32400506  | 32408227  | TC1600000440.mm.1 | 0.2  | 0.239714 |
| TC0900000927.mm.1 | ENSMUST00000179879 | Gm26189     | predicted gene, 26189                           | 13275516  | 13275622  | TC0900000082.mm.1 | -0.7 | 0.239781 |
| TC0900000937.mm.1 | NM_153594          | Pcmt2       | protein-L-isoaspartate (D-aspartate) O-methyltr | 181837854 | 181857461 | TC0200002836.mm.1 | -0.2 | 0.239878 |
| TC0900000942.mm.1 | ENSMUST00000157494 | Gm24060     | predicted gene, 24060                           | 118180941 | 118181035 | TC1100004153.mm.1 | -0.3 | 0.239889 |
| TC0900000946.mm.1 | NM_011834          | Aadat       | aminoadipate aminotransferase                   | 60506124  | 60545677  | TC0800000645.mm.1 | 0.8  | 0.23989  |
| TC0900000950.mm.1 | ENSMUST00000083437 | Gm22739     | predicted gene, 22739                           | 4484234   | 4484393   | TC1000000029.mm.1 | -0.3 | 0.24027  |
| TC0900000951.mm.1 | NM_007933          | Eno3        | enolase 3, beta muscle                          | 70657176  | 70662513  | TC1100000964.mm.1 | 0.0  | 0.240415 |
| TC0900000952.mm.1 | NM_025402          | Ogfd3       | 2-oxoglutarate and iron-dependent oxygenase d   | 121177591 | 121204711 | TC1100004248.mm.1 | 0.1  | 0.240592 |
| TC0900000954.mm.1 | ENSMUST00000169443 | Rpl21-p     | ribosomal protein L21, pseudogene 15            | 151215135 | 151215687 | TC0X00003176.mm.1 | -0.3 | 0.240987 |
| TC0900000956.mm.1 | XM_001475449       | Gm10145     | predicted gene 10145                            | 27936344  | 27936828  | TC1000000244.mm.1 | -0.3 | 0.241095 |
| TC0900000958.mm.1 | NM_019774          | Akap8       | A kinase (PKA) anchor protein 8                 | 32303676  | 32321153  | TC1700001838.mm.1 | -0.3 | 0.24136  |
| TC0900000961.mm.1 | ENSMUST00000127246 | Gm8778      | predicted gene 8778                             | 128976866 | 128977972 | TC0600003222.mm.1 | -0.1 | 0.241492 |
| TC0900000965.mm.1 | ENSMUST00000157769 | Gm26312     | predicted gene, 26312                           | 56725073  | 56725237  | TC0X00000524.mm.1 | 0.1  | 0.24167  |
| TC0900000966.mm.1 | NR_030645          | Mir467e     | microRNA 467e                                   | 10708387  | 10865874  | TC0100001961.mm.1 | 0.2  | 0.241827 |
| TC0900000972.mm.1 | NM_029353          | Malsu1      | mitochondrial assembly of ribosomal large subu  | 49073795  | 49086751  | TC0600000578.mm.1 | -0.1 | 0.241848 |
| TC0900000975.mm.1 | NR_030578          | Mir654      | microRNA 654                                    | 109723218 | 109723301 | TC1200001183.mm.1 | -0.1 | 0.241957 |
| TC0900000978.mm.1 | NM_016899          | Rab25       | RAB25, member RAS oncogene family               | 88542029  | 88548300  | TC0300002316.mm.1 | -0.1 | 0.24197  |
| TC0900000982.mm.1 | ENSMUST00000083303 | Gm22975     | predicted gene, 22975                           | 74624642  | 74624748  | TC0200001089.mm.1 | -0.1 | 0.242044 |
| TC0900000984.mm.1 | NM_023363          | Zfp788      | zinc finger protein 788                         | 41633203  | 41651534  | TC0700000733.mm.1 | -0.1 | 0.242069 |
| TC0900000986.mm.1 | ENSMUST00000082495 | Gm22747     | predicted gene, 22747                           | 127079481 | 127079587 | TC0700001832.mm.1 | -0.6 | 0.242326 |
| TC0900000996.mm.1 | ENSMUST00000158003 | Gm23315     | predicted gene, 23315                           | 53700847  | 53700955  | TC0200003549.mm.1 | 0.1  | 0.242374 |
| TC0900000999.mm.1 | ENSMUST00000157089 | Gm25827     | predicted gene, 25827                           | 108521924 | 108522030 | TC0400003246.mm.1 | -0.1 | 0.242515 |
| TC0900001005.mm.1 | XR_141136          | Gm20235     | predicted gene, 20235                           | 73910555  | 73914501  | TC1200000653.mm.1 | -0.1 | 0.242804 |
| TC0900001008.mm.1 | NM_026960          | Gsdmd       | gasdermin D                                     | 75862339  | 75867408  | TC1500000565.mm.1 | -0.1 | 0.243162 |
| TC0900001012.mm.1 | ENSMUST00000095268 | Rpl21-p     | ribosomal protein L21, pseudogene 7             | 45466788  | 45466720  | TC1700000860.mm.1 | -0.4 | 0.243303 |
| TC0900001016.mm.1 | NM_015735          | Ddb1        | damage specific DNA binding protein 1           | 10605625  | 10629822  | TC1900000205.mm.1 | 0.2  | 0.243436 |
| TC0900001028.mm.1 | ENSMUST00000083251 | Gm25137     | predicted gene, 25137                           | 116674153 | 116674262 | TC0400001258.mm.1 | -0.5 | 0.243568 |
| TC0900001036.mm.1 | ENSMUST00000104354 | Gm22023     | predicted gene, 22023                           | 164283096 | 164283225 | TC0X00001666.mm.1 | 0.2  | 0.243821 |
| TC0900001038.mm.1 | NM_001039647       | Gbp11       | guanylate binding protein 11                    | 105323026 | 105346472 | TC0500002896.mm.1 | -0.2 | 0.243956 |
| TC0900001049.mm.1 | NM_176917          | Mettl4      | methyltransferase like 4                        | 94727080  | 94750019  | TC1700002755.mm.1 | -0.1 | 0.244054 |
| TC0900001050.mm.1 | NM_026436          | Tmem86a     | transmembrane protein 86A                       | 47050640  | 47054776  | TC0700000886.mm.1 | 0.1  | 0.244258 |
| TC0900001070.mm.1 | NM_010813          | Mnt         | max binding protein                             | 74830920  | 74845725  | TC1100001050.mm.1 | -0.1 | 0.244266 |
| TC0900001071.mm.1 | ENSMUST00000083389 | Gm24319     | predicted gene, 24319                           | 15680004  | 15680110  | TC1900000293.mm.1 | -0.7 | 0.24437  |

|                   |                    |         |                                                 |           |           |                    |      |          |
|-------------------|--------------------|---------|-------------------------------------------------|-----------|-----------|--------------------|------|----------|
| TC0900001078.mm.1 | ENSMUST00000141865 | Gm13898 | predicted gene 13898                            | 17710598  | 17711207  | TC0600001897.mm.1  | -0.1 | 0.24443  |
| TC0900001083.mm.1 | NM_001167818       | Rnls    | renalase, FAD-dependent amine oxidase           | 33137744  | 33392295  | TC1900001404.mm.1  | -0.1 | 0.244659 |
| TC0900001103.mm.1 | NM_001001185       | BC04850 | cDNA sequence BC048507                          | 67863326  | 678633923 | TC1300000833.mm.1  | -0.2 | 0.244692 |
| TC0900001106.mm.1 | NM_138677          | Edem1   | ER degradation enhancer, mannosidase alpha-lik  | 108828641 | 108859356 | TC0600001207.mm.1  | -0.4 | 0.244693 |
| TC0900001109.mm.1 | ENSMUST00000082459 | Gm23627 | predicted gene, 23627                           | 110421361 | 110421467 | TC0800002922.mm.1  | -0.7 | 0.244711 |
| TC0900001110.mm.1 | NCBI_Gene:629842:p | Ighv13- | Ighv13-2 immunoglobulin heavy variable 13-2     | 114357759 | 114358218 | TC1200002593.mm.1  | -0.3 | 0.244802 |
| TC0900001115.mm.1 | ENSMUST00000157510 | Gm22588 | predicted gene, 22588                           | 29849461  | 29849600  | TC1100000307.mm.1  | 0.2  | 0.244889 |
| TC0900001117.mm.1 | ENSMUST00000167814 | Gm17530 | predicted gene, 17530                           | 86546682  | 86546795  | TC0900002778.mm.1  | 0.1  | 0.244924 |
| TC0900001119.mm.1 | NM_016677          | Hpcal1  | hippocalcin-like 1                              | 17690814  | 17791930  | TC1200000145.mm.1  | -0.2 | 0.244926 |
| TC0900001122.mm.1 | ENSMUST00000184837 | RP23-26 | N/A                                             | 36482296  | 36482494  | TC0900000346.mm.1  | -0.3 | 0.245019 |
| TC0900001123.mm.1 | ENSMUST00000184257 | Gm11983 | predicted gene 11983                            | 6835626   | 6837654   | TC1100002190.mm.1  | -0.1 | 0.245074 |
| TC0900001128.mm.1 | ENSMUST00000082956 | Gm22505 | predicted gene, 22505                           | 99707740  | 99707847  | TC0300002576.mm.1  | -0.7 | 0.245135 |
| TC0900001129.mm.1 | ENSMUST00000083100 | Gm22363 | predicted gene, 22363                           | 42775573  | 42775680  | TC0600002181.mm.1  | -0.7 | 0.245135 |
| TC0900001132.mm.1 | NM_001122829       | Upf1    | UPF1 regulator of nonsense transcripts homolog  | 70331522  | 70353273  | TC0800002390.mm.1  | -0.2 | 0.245188 |
| TC0900001142.mm.1 | NCBI_Gene:668591:p | Ighv1-8 | immunoglobulin heavy variable 1-81              | 115920279 | 115920712 | TC1200002660.mm.1  | -0.8 | 0.245386 |
| TC0900001144.mm.1 | NM_177647          | Cdnf    | cerebral dopamine neurotrophic factor           | 3513030   | 3526376   | TC0200000009.mm.1  | 0.1  | 0.245445 |
| TC0900001145.mm.1 | ENSMUST00000184716 | RP23-14 | N/A                                             | 106091210 | 106092475 | TC0700003999.mm.1  | -0.1 | 0.245689 |
| TC0900001155.mm.1 | NM_008063          | Slc37a4 | solute carrier family 37 (glucose-6-phosphate t | 44396971  | 44402966  | TC0900000509.mm.1  | 0.2  | 0.245732 |
| TC0900001159.mm.1 | NM_027485          | Med26   | mediator complex subunit 26                     | 72494558  | 72548310  | TC0800002466.mm.1  | -0.1 | 0.245771 |
| TC0900001160.mm.1 | ENSMUST00000184441 | RP23-2C | N/A                                             | 14304780  | 14305569  | TC0700000171.mm.1  | -0.1 | 0.24585  |
| TC0900001162.mm.1 | NM_016922          | Gal3st1 | galactose-3-O-sulfotransferase 1                | 3983636   | 3999328   | TC1100000029.mm.1  | -0.1 | 0.245931 |
| TC0900001173.mm.1 | ENSMUST00000180247 | Gm25740 | predicted gene, 25740                           | 46377609  | 46377715  | TC1000000435.mm.1  | 0.1  | 0.246139 |
| TC0900001175.mm.1 | ENSMUST00000083151 | Gm23448 | predicted gene, 23448                           | 63300280  | 63300383  | TC0100002451.mm.1  | 0.1  | 0.246147 |
| TC0900001179.mm.1 | NM_018783          | Tfip11  | tuftelin interacting protein 11                 | 112326358 | 112338083 | TC0500001180.mm.1  | -0.1 | 0.246212 |
| TC0900001182.mm.1 | NR_029458          | A530088 | RIKEN cDNA A530088E08 gene                      | 32403006  | 32404808  | TC1700000560.mm.1  | -0.1 | 0.246286 |
| TC0900001198.mm.1 | ENSMUST00000122626 | Gm23656 | predicted gene, 23656                           | 105873824 | 105873935 | TC0X00001064.mm.1  | 0.1  | 0.246303 |
| TC0900001200.mm.1 | NM_013560          | Hspb1   | heat shock protein 1                            | 135887919 | 135889563 | TC0500001590.mm.1  | 0.1  | 0.246341 |
| TC0900001219.mm.1 | ENSMUST00000156818 | Gm8975  | predicted gene 8975                             | 33459609  | 33473191  | TC1900001406.mm.1  | 0.1  | 0.246538 |
| TC0900001223.mm.1 | ENSMUST00000175261 | Gm24154 | predicted gene, 24154                           | 112618096 | 112618225 | TC07000004123.mm.1 | 0.1  | 0.24658  |
| TC0900001232.mm.1 | XM_001477899       | Gm10705 | predicted gene 10705                            | 87207541  | 87208025  | TC0300002282.mm.1  | -0.2 | 0.24662  |
| TC0900001234.mm.1 | ENSMUST00000179026 | Gm26435 | predicted gene, 26435                           | 30291868  | 30291974  | TC0900001969.mm.1  | -0.4 | 0.246805 |
| TC0900001243.mm.1 | ENSMUST00000157602 | Gm22597 | predicted gene, 22597                           | 55179840  | 55179919  | TC1800000559.mm.1  | -0.2 | 0.246818 |
| TC0900001247.mm.1 | NM_023311          | Yipf5   | Yip1 domain family, member 5                    | 40204865  | 40219399  | TC1800001246.mm.1  | 0.1  | 0.246823 |
| TC0900001252.mm.1 | ENSMUST00000120231 | Gm12461 | predicted gene 12461                            | 51892893  | 51894131  | TC0400000563.mm.1  | -0.1 | 0.246903 |
| TC0900001256.mm.1 | NM_021326          | Rbak    | RB-associated KRAB repressor                    | 143172186 | 143180775 | TC05000003549.mm.1 | 0.0  | 0.246961 |
| TC0900001275.mm.1 | XR_141279          | Gm10866 | predicted gene 10866                            | 78899712  | 78899712  | TC1500001853.mm.1  | -0.1 | 0.246982 |
| TC0900001281.mm.1 | ENSMUST00000082469 | Gm23928 | predicted gene, 23928                           | 91667149  | 91667293  | TC0700003733.mm.1  | -0.3 | 0.246985 |
| TC0900001287.mm.1 | NM_133779          | Pigt    | phosphatidylinositol glycan anchor biosynthesis | 164497520 | 164508301 | TC0200002517.mm.1  | 0.2  | 0.247049 |
| TC0900001290.mm.1 | NM_011704          | Vnn1    | vanin 1                                         | 23894688  | 23905343  | TC1000000193.mm.1  | 0.2  | 0.247154 |
| TC0900001299.mm.1 | NM_009627          | Adm     | adrenomedullin                                  | 110627669 | 110629820 | TC0700001630.mm.1  | 0.2  | 0.247191 |
| TC0900001317.mm.1 | ENSMUST00000121581 | Gm14451 | predicted gene 14451                            | 5869686   | 5871506   | TC0X00001754.mm.1  | -0.1 | 0.247247 |
| TC0900001329.mm.1 | NM_001201367       | Tmem200 | transmembrane protein 200B                      | 131921771 | 131923140 | TC0400001574.mm.1  | 0.1  | 0.247257 |
| TC0900001337.mm.1 | ENSMUST00000104668 | Gm25568 | predicted gene, 25568                           | 19921310  | 19921399  | TC0100002027.mm.1  | 0.3  | 0.247263 |
| TC0900001339.mm.1 | ENSMUST00000158032 | Gm24847 | predicted gene, 24847                           | 59559315  | 59559422  | TC0800000641.mm.1  | 0.1  | 0.247279 |
| TC0900001344.mm.1 | NM_023418          | Pgam1   | phosphoglycerate mutase 1                       | 41911871  | 41918665  | TC1900000600.mm.1  | 0.2  | 0.247284 |
| TC0900001347.mm.1 | ENSMUST00000082465 | Gm23629 | predicted gene, 23629                           | 63099536  | 63099642  | TC1400000894.mm.1  | -0.3 | 0.247345 |
| TC0900001348.mm.1 | ENSMUST00000068006 | Mocos   | molybdenum cofactor sulfurase                   | 24653691  | 24701556  | TC1800000200.mm.1  | 0.1  | 0.247356 |
| TC0900001349.mm.1 | NM_031185          | Akap12  | A kinase (PRKA) anchor protein (gravin) 12      | 4266329   | 4359471   | TC1000000021.mm.1  | 0.2  | 0.24742  |
| TC0900001360.mm.1 | ENSMUST00000157971 | Gm24602 | predicted gene, 24602                           | 102523894 | 102523956 | TC0800001169.mm.1  | -0.1 | 0.247433 |
| TC0900001362.mm.1 | XR_141104          | Gm20169 | predicted gene, 20169                           | 68149883  | 68151887  | TC1100000869.mm.1  | 0.1  | 0.247459 |
| TC0900001363.mm.1 | NR_030449          | Mir680- | microRNA 680-3                                  | 35194811  | 35194897  | TC1200001637.mm.1  | -0.1 | 0.247561 |
| TC0900001365.mm.1 | NCBI_Gene:434609:p | Ighv1-8 | immunoglobulin heavy variable 1-84              | 115980702 | 115981134 | TC1200002663.mm.1  | -0.6 | 0.24762  |
| TC0900001371.mm.1 | NR_039540          | Mir3963 | microRNA 3963                                   | 151023792 | 151023862 | TC03000003129.mm.1 | 0.1  | 0.247649 |
| TC0900001374.mm.1 | ENSMUST00000104779 | Mir466f | microRNA 466f-1                                 | 10466944  | 10467037  | TC0200000091.mm.1  | 0.3  | 0.247653 |
| TC0900001375.mm.1 | NM_001168488       | Men1    | multiple endocrine neoplasia 1                  | 6334979   | 6340894   | TC1900000113.mm.1  | -0.1 | 0.247874 |
| TC0900001377.mm.1 | ENSMUST00000175427 | Gm22990 | predicted gene, 22990                           | 21564561  | 21564649  | TC1100002330.mm.1  | 0.2  | 0.247918 |
| TC0900001398.mm.1 | XM_001478799       | Gm4024  | predicted pseudogene 4024                       | 35990861  | 35991542  | TC1300001807.mm.1  | 0.4  | 0.247976 |
| TC0900001402.mm.1 | ENSMUST00000183069 | Gm8793  | predicted gene 8793                             | 31639158  | 31640460  | TC1000000282.mm.1  | 0.1  | 0.24806  |
| TC0900001406.mm.1 | NM_025920          | Thap4   | THAP domain containing 4                        | 93705390  | 93754864  | TC0100002837.mm.1  | -0.1 | 0.248418 |
| TC0900001408.mm.1 | ENSMUST00000122549 | n-R5s98 | nuclear encoded rRNA 5S 98                      | 54866261  | 54866379  | TC0800000594.mm.1  | 0.2  | 0.248475 |
| TC0900001411.mm.1 | ENSMUST00000083319 | Gm23970 | predicted gene, 23970                           | 20280519  | 20280625  | TC0200000327.mm.1  | 0.2  | 0.248657 |
| TC0900001414.mm.1 | NM_008415          | Jrk     | jerky                                           | 74702412  | 74709535  | TC1500001713.mm.1  | -0.1 | 0.248738 |
| TC0900001416.mm.1 | NM_182957          | Gm17019 | predicted gene 17019                            | 15028950  | 15033007  | TC0500001975.mm.1  | -0.1 | 0.248787 |
| TC0900001418.mm.1 | ENSMUST00000102415 | Gm22369 | predicted gene, 22369                           | 9855319   | 9855422   | TC1900000178.mm.1  | 0.1  | 0.24897  |
| TC0900001422.mm.1 | NM_028762          | Rbm19   | RNA binding motif protein 19                    | 120116510 | 120198981 | TC0500001332.mm.1  | -0.1 | 0.249067 |
| TC0900001423.mm.1 | ENSMUST00000183570 | BX32259 | N/A                                             | 26579877  | 26579982  | TC0X00001984.mm.1  | 0.5  | 0.249085 |
| TC0900001426.mm.1 | ENSMUST00000175324 | Gm23154 | predicted gene, 23154                           | 87432272  | 87432336  | TC0400000876.mm.1  | -0.5 | 0.24915  |
| TC0900001427.mm.1 | ENSMUST00000055878 | Gm5548  | predicted pseudogene 5548                       | 113053889 | 113054284 | TC0300002777.mm.1  | 0.1  | 0.249381 |
| TC0900001431.mm.1 | NM_178916          | Rfesd   | Rieske (Fe-S) domain containing                 | 76001535  | 76018712  | TC1300002339.mm.1  | -0.1 | 0.249394 |
| TC0900001433.mm.1 | NM_013499          | Cr1l    | complement component (3b/4b) receptor 1-like    | 195097382 | 195131570 | TC0100003855.mm.1  | 0.2  | 0.249402 |
| TC0900001434.mm.1 | NM_001167679       | Wdr67   | WD repeat domain 67                             | 57912199  | 57970068  | TC1500000407.mm.1  | -0.1 | 0.249534 |
| TC0900001440.mm.1 | ENSMUST00000117532 | Gm16202 | predicted gene 16202                            | 86316141  | 86316684  | TC0900002777.mm.1  | -0.1 | 0.249593 |
| TC0900001442.mm.1 | NM_001198789       | Gm5918  | predicted gene 5918                             | 72979722  | 72985382  | TC0900002651.mm.1  | 0.2  | 0.249616 |
| TC0900001452.mm.1 | NR_035455          | Mir1934 | microRNA 1934                                   | 69663043  | 69663125  | TC1100000920.mm.1  | 0.1  | 0.249669 |
| TC0900001458.mm.1 | ENSMUST00000179034 | Gm22129 | predicted gene, 22129                           | 17205792  | 17205898  | TC1600001284.mm.1  | -0.6 | 0.249933 |
| TC0900001461.mm.1 | NCBI_Gene:10077517 | Gm16710 | predicted gene, 16710                           | 115802648 | 115803080 | TC1200002653.mm.1  | -0.8 | 0.250007 |
| TC0900001463.mm.1 | uc029xle.1         | LOC4328 | non-coding RNA, oocyte_clustered_small_RNA4-    | 80623097  | 80980748  | TC0X00000798.mm.1  | 0.3  | 0.25005  |
| TC0900001467.mm.1 | NM_010111          | Efnb2   | ephrin B2                                       | 8617434   | 8661061   | TC0800001654.mm.1  | 0.2  | 0.25012  |

|                   |                    |          |                                                 |           |           |                    |      |          |
|-------------------|--------------------|----------|-------------------------------------------------|-----------|-----------|--------------------|------|----------|
| TC0900001476.mm.1 | ENSMUST00000093714 | Gm22886  | predicted gene, 22886                           | 21380825  | 21380931  | TC1800001059.mm.1  | -0.4 | 0.250235 |
| TC0900001483.mm.1 | NM_175026          | Phyin1   | pyrin and HIN domain family, member 1           | 173630859 | 173647928 | TC0100001632.mm.1  | -0.5 | 0.25039  |
| TC0900001496.mm.1 | NM_019985          | Clec1b   | C-type lectin domain family 1, member b         | 129397297 | 129405413 | TC0600003536.mm.1  | -0.3 | 0.250451 |
| TC0900001507.mm.1 | uc009uyy.1         | Ube1y1   | ubiquitin-activating enzyme E1, Chr Y 1 (Ube1y1 | 670179    | 695295    | TC0Y00000226.mm.1  | -0.2 | 0.250566 |
| TC0900001511.mm.1 | NM_009437          | Tst      | thiosulfate sulfurtransferase, mitochondrial    | 78399556  | 78405859  | TC1500001831.mm.1  | -0.1 | 0.250616 |
| TC0900001516.mm.1 | NM_008795          | Cdk18    | cyclin-dependent kinase 18                      | 132113547 | 132139685 | TC0100003069.mm.1  | 0.1  | 0.250624 |
| TC0900001517.mm.1 | NM_001033252       | Gm732    | predicted gene 732                              | 107945735 | 107948465 | TC0X00002848.mm.1  | 0.1  | 0.250692 |
| TC0900001521.mm.1 | XR_106142          | Gm10644  | predicted gene 10644                            | 83932320  | 83955205  | TC0800002561.mm.1  | -0.1 | 0.250702 |
| TC0900001532.mm.1 | NM_016764          | Prdx4    | peroxiredoxin 4                                 | 155323918 | 155340754 | TC0X00003239.mm.1  | -0.1 | 0.250752 |
| TC0900001533.mm.1 | NM_001159404       | Llg1     | lethal giant larvae homolog 1 (Drosophila)      | 60699690  | 60714188  | TC1100000759.mm.1  | -0.1 | 0.25077  |
| TC0900001534.mm.1 | ENSMUST00000115924 | AC16897  | N/A                                             | 128553    | 151235    | TC1_GL456212_rand  | -0.2 | 0.250818 |
| TC0900001554.mm.1 | NM_019719          | Stub1    | STIP1 homology and U-Box containing protein 1   | 25830636  | 25833361  | TC1700001675.mm.1  | 0.1  | 0.250956 |
| TC0900001576.mm.1 | NM_144875          | Rab71    | RAB7, member RAS oncogene family-like 1         | 131867224 | 131872889 | TC0100001177.mm.1  | 0.1  | 0.250987 |
| TC0900001578.mm.1 | ENSMUST00000180212 | Gm24659  | predicted gene, 24659                           | 89291190  | 89291299  | TC0700003711.mm.1  | 0.1  | 0.25101  |
| TC0900001582.mm.1 | ENSMUST00000179283 | Gm22171  | predicted gene, 22171                           | 89295755  | 89295864  | TC0700003712.mm.1  | 0.1  | 0.25101  |
| TC0900001592.mm.1 | ENSMUST00000177816 | Gm25871  | predicted gene, 25871                           | 15413980  | 15414089  | TC0800000157.mm.1  | 0.1  | 0.25101  |
| TC0900001595.mm.1 | NM_173381          | 6720489  | RIKEN cDNA 6720489N17 gene                      | 62603015  | 62624182  | TC1300002169.mm.1  | -0.1 | 0.251135 |
| TC0900001596.mm.1 | NM_001160149       | Cgref1   | cell growth regulator with EF hand domain 1     | 30933143  | 30945480  | TC05000002168.mm.1 | 0.1  | 0.251221 |
| TC0900001598.mm.1 | NM_021789          | Trappc4  | trafficking protein particle complex 4          | 44403759  | 44407548  | TC0900002164.mm.1  | 0.2  | 0.251253 |
| TC0900001603.mm.1 | NR_028550          | Snord49  | small nucleolar RNA, C/D box 49A                | 62603450  | 62603521  | TC1100000805.mm.1  | -0.7 | 0.251272 |
| TC0900001605.mm.1 | XM_126432          | Gm4802   | predicted gene 4802                             | 49412250  | 49425168  | TC1600001697.mm.1  | -0.2 | 0.251593 |
| TC0900001612.mm.1 | NM_001252266       | Ica1     | islet cell autoantigen 1                        | 8630527   | 8778488   | TC0600001852.mm.1  | 0.1  | 0.251728 |
| TC0900001650.mm.1 | XR_141238          | Gm19703  | predicted gene, 19703                           | 40930246  | 40931086  | TC1400001784.mm.1  | 0.1  | 0.251766 |
| TC0900001654.mm.1 | ENSMUST00000181168 | B430218  | ---                                             | 118386630 | 118388124 | TC1300001340.mm.1  | 0.1  | 0.25182  |
| TC0900001656.mm.1 | ENSMUST00000177600 | Gm3757   | predicted pseudogene 3757                       | 4882376   | 4883086   | TC0X00000030.mm.1  | -0.1 | 0.251955 |
| TC0900001658.mm.1 | NM_201357          | Tssc1    | tumor suppressing subtransferable candidate 1   | 28751828  | 28867491  | TC1200000239.mm.1  | -0.1 | 0.252024 |
| TC0900001659.mm.1 | NM_001033405       | Trem12   | triggering receptor expressed on myeloid cells- | 48299498  | 48312534  | TC0500003599.mm.1  | -0.3 | 0.252039 |
| TC0900001665.mm.1 | XM_985877          | Gm8279   | predicted gene 8279                             | 5131519   | 5139959   | TC1400000039.mm.1  | 0.1  | 0.252077 |
| TC0900001666.mm.1 | ENSMUST00000185179 | HOTTIP_  | HOXA transcript at the distal tip, conserved re | 52261154  | 52261212  | TC0600000624.mm.1  | -0.1 | 0.252226 |
| TC0900001672.mm.1 | ENSMUST00000121276 | Gm13674  | predicted gene 13674                            | 80131930  | 80132752  | TC0200001168.mm.1  | -0.1 | 0.252332 |
| TC0900001674.mm.1 | ENSMUST00000082498 | Gm25587  | predicted gene, 25587                           | 105040273 | 105040438 | TC1000001251.mm.1  | -0.2 | 0.252419 |
| TC0900001681.mm.1 | NM_177380          | Cyp3a44  | cytochrome P450, family 3, subfamily a, polypep | 145773983 | 145805874 | TC0500003599.mm.1  | -0.1 | 0.252445 |
| TC0900001690.mm.1 | NM_026835          | Ms4a6d   | membrane-spanning 4-domains, subfamily A, m     | 11586604  | 11604849  | TC1900001137.mm.1  | 0.2  | 0.252596 |
| TC0900001692.mm.1 | ENSMUST00000158846 | Gm25367  | predicted gene, 25367                           | 164268071 | 164268176 | TC0X00003333.mm.1  | 0.1  | 0.252695 |
| TC0900001693.mm.1 | NM_019871          | Slc35g3  | solute carrier family 35, member G3             | 69759884  | 69761968  | TC1100003062.mm.1  | -0.1 | 0.252714 |
| TC0900001714.mm.1 | ENSMUST00000122467 | Gm14373  | predicted gene 14373                            | 5699727   | 5701884   | TC0X00001752.mm.1  | -0.1 | 0.252776 |
| TC0900001720.mm.1 | ENSMUST00000104315 | Gm24231  | predicted gene, 24231                           | 15227405  | 15227537  | TC0800001766.mm.1  | 0.1  | 0.252835 |
| TC0900001721.mm.1 | ENSMUST00000082735 | Gm24461  | predicted gene, 24461                           | 80558685  | 80558787  | TC0200001174.mm.1  | 0.1  | 0.252907 |
| TC0900001725.mm.1 | ENSMUST00000082821 | Gm26328  | predicted gene, 26328                           | 52342777  | 52342883  | TC1400000610.mm.1  | -0.6 | 0.253009 |
| TC0900001726.mm.1 | ENSMUST00000157311 | Gm23675  | predicted gene, 23675                           | 53512002  | 53512126  | TC0300000399.mm.1  | 0.2  | 0.253036 |
| TC0900001740.mm.1 | NM_028718          | Traf3ip  | TRAF3 interacting protein 1                     | 91494668  | 91529307  | TC0100000897.mm.1  | 0.0  | 0.253074 |
| TC0900001742.mm.1 | NR_040604          | Gm10373  | predicted gene 10373                            | 43430943  | 43477036  | TC1500001461.mm.1  | -0.1 | 0.253083 |
| TC0900001743.mm.1 | ENSMUST00000118998 | Gm15920  | predicted gene 15920                            | 130188395 | 130188796 | TC0500001527.mm.1  | 0.4  | 0.253146 |
| TC0900001764.mm.1 | NM_147001          | Olfir172 | olfactory receptor 172                          | 58760152  | 58761240  | TC1600001779.mm.1  | 0.1  | 0.253173 |
| TC0900001778.mm.1 | NM_001039666       | Krt40    | keratin 40                                      | 99537485  | 99543158  | TC1100003711.mm.1  | -0.1 | 0.253195 |
| TC0900001781.mm.1 | TC0900001781.mm.1  | Npl      | N-acetylneuraminate pyruvate lyase              | 153503015 | 153549714 | TC0100003280.mm.1  | -0.1 | 0.253338 |
| TC0900001784.mm.1 | ENSMUST00000183722 | RP24-84  | N/A                                             | 15118004  | 15118384  | TC0700002400.mm.1  | -0.1 | 0.25372  |
| TC0900001787.mm.1 | ENSMUST00000102388 | Gm25213  | predicted gene, 25213                           | 96357111  | 96357223  | TC1300001086.mm.1  | 0.1  | 0.253827 |
| TC0900001788.mm.1 | ENSMUST00000108934 | C330013  | RIKEN cDNA C330013J21 gene                      | 177903064 | 177925650 | TC0200005377.mm.1  | 0.1  | 0.25389  |
| TC0900001803.mm.1 | ENSMUST00000181588 | C630004  | ---                                             | 10047838  | 10049519  | TC0200000081.mm.1  | -0.1 | 0.254003 |
| TC0900001826.mm.1 | NM_053231          | Vmn1r10  | vomer nasal 1 receptor 10                       | 57113396  | 57114367  | TC0600000685.mm.1  | 0.1  | 0.25402  |
| TC0900001846.mm.1 | NM_009504          | Vdr      | vitamin D receptor                              | 97854425  | 97910630  | TC1500002159.mm.1  | -0.1 | 0.254104 |
| TC0900001850.mm.1 | NM_001290181       | Nudt7    | nudix (nucleoside diphosphate linked moiety X)- | 0         | 0         | TSUnmapped0000001  | 0.1  | 0.254196 |
| TC0900001851.mm.1 | NM_025901          | Polr3k   | polymerase (RNA) III (DNA directed) polypeptide | 181864337 | 181870830 | TC0200002837.mm.1  | -0.1 | 0.25457  |
| TC0900001857.mm.1 | NM_134116          | Gpsm3    | G-protein signalling modulator 3 (AGS3-like, C. | 34589806  | 34591754  | TC1700002783.mm.1  | -0.1 | 0.254683 |
| TC0900001858.mm.1 | NM_026536          | Atp5s    | ATP synthase, H+ transporting, mitochondrial FO | 69724962  | 69744660  | TC1200000576.mm.1  | 0.1  | 0.254946 |
| TC0900001859.mm.1 | ENSMUST00000116857 | Gm22071  | predicted gene, 22071                           | 179990797 | 179990882 | TC0200005398.mm.1  | 0.3  | 0.255049 |
| TC0900001867.mm.1 | NM_176843          | Ints5    | integrator complex subunit 5                    | 8892987   | 8897890   | TC1900000164.mm.1  | -0.1 | 0.255099 |
| TC0900001868.mm.1 | NM_001007573       | Maneal   | mannosidase, endo-alpha-like                    | 124855239 | 124862171 | TC0400003514.mm.1  | -0.2 | 0.25522  |
| TC0900001874.mm.1 | ENSMUST00000116932 | Gm24907  | predicted gene, 24907                           | 150807859 | 150807986 | TC0X00003169.mm.1  | 0.1  | 0.255294 |
| TC0900001879.mm.1 | ENSMUST00000169031 | Gm17192  | predicted gene 17192                            | 61460962  | 61461472  | TC1600000782.mm.1  | -0.1 | 0.255315 |
| TC0900001883.mm.1 | ENSMUST00000082880 | Gm23939  | predicted gene, 23939                           | 133601223 | 133601355 | TC0100001208.mm.1  | -0.3 | 0.255469 |
| TC0900001884.mm.1 | ENSMUST00000099951 | Gm13695  | predicted gene 13695                            | 83967313  | 83969805  | TC0200001208.mm.1  | -0.3 | 0.255597 |
| TC0900001885.mm.1 | NCBI_Gene:620400:p | Igkv8-2  | immunoglobulin kappa variable 8-21              | 70314895  | 70315452  | TC0600003591.mm.1  | -0.4 | 0.255759 |
| TC0900001887.mm.1 | NM_029553          | Ttc8     | tetratricopeptide repeat domain 8               | 98920574  | 98983238  | TC1200000978.mm.1  | 0.1  | 0.255774 |
| TC0900001895.mm.1 | ENSMUST00000184484 | AL66998  | N/A                                             | 131992218 | 131992289 | TC0400003655.mm.1  | -0.1 | 0.255819 |
| TC0900001896.mm.1 | ENSMUST00000158685 | Gm23181  | predicted gene, 23181                           | 95039934  | 95040043  | TC0100002842.mm.1  | 0.1  | 0.256118 |
| TC0900001899.mm.1 | NM_001177369       | Nfkb2    | nuclear factor of kappa light polypeptide gene  | 46304737  | 46312385  | TC1900000689.mm.1  | -0.1 | 0.256215 |
| TC0900001900.mm.1 | NM_001205057       | Gm14295  | predicted gene 14295                            | 176798600 | 176811223 | TC0200002741.mm.1  | 0.4  | 0.256237 |
| TC0900001901.mm.1 | ENSMUST00000104259 | Gm23129  | predicted gene, 23129                           | 94987007  | 94987138  | TC1500002114.mm.1  | -0.1 | 0.256298 |
| TC0900001903.mm.1 | ENSMUST00000082412 | mt-Tr    | mitochondrially encoded tRNA arginine           | 9808      | 9875      | TC0M00000012.mm.1  | 0.3  | 0.256445 |
| TC0900001910.mm.1 | NM_199032          | Cep135   | centrosomal protein 135                         | 76588698  | 76646466  | TC0500000724.mm.1  | -0.1 | 0.256667 |
| TC0900001911.mm.1 | ENSMUST00000146065 | Gm16345  | predicted gene 16345                            | 32031089  | 32031246  | TC1800000252.mm.1  | -0.4 | 0.256681 |
| TC0900001913.mm.1 | NR_038126          | 610009   | RIKEN cDNA 0610009L18 gene                      | 120348678 | 120351190 | TC1000002024.mm.1  | 0.1  | 0.256832 |
| TC0900001915.mm.1 | NM_054078          | Baz2a    | bromodomain adjacent to zinc finger domain, 2/  | 128091610 | 128129303 | TC1000001587.mm.1  | -0.1 | 0.257015 |
| TC0900001926.mm.1 | NM_011198          | Ptgs2    | prostaglandin-endoperoxide synthase 2           | 150100124 | 150108017 | TC0100001338.mm.1  | 0.5  | 0.25713  |
| TC0900001937.mm.1 | ENSMUST00000117738 | Gm13819  | predicted gene 13819                            | 114828573 | 114829215 | TC0500003072.mm.1  | -0.1 | 0.257212 |
| TC0900001946.mm.1 | NM_178715          | Tmem30b  | transmembrane protein 30B                       | 73543114  | 73546395  | TC1200001921.mm.1  | -0.1 | 0.257339 |

|                   |                    |         |                                                 |           |           |                    |      |          |
|-------------------|--------------------|---------|-------------------------------------------------|-----------|-----------|--------------------|------|----------|
| TC0900001969.mm.1 | NM_025892          | Cep19   | centrosomal protein 19                          | 32099800  | 32108069  | TC1600000429.mm.1  | -0.1 | 0.257449 |
| TC0900001985.mm.1 | ENSMUST00000082921 | Gm24526 | predicted gene, 24526                           | 63027560  | 63027717  | TC0900000795.mm.1  | 0.1  | 0.257634 |
| TC0900001987.mm.1 | ENSMUST00000157665 | Gm26413 | predicted gene, 26413                           | 116163910 | 116164036 | TC1100004106.mm.1  | -0.1 | 0.257944 |
| TC0900001988.mm.1 | NR_037271          | Mir3088 | microRNA 3088                                   | 28733278  | 28733351  | TC0200000493.mm.1  | -0.1 | 0.257945 |
| TC0900001996.mm.1 | ENSMUST00000158740 | Gm23823 | predicted gene, 23823                           | 77540642  | 77540765  | TC1400002458.mm.1  | 0.2  | 0.25801  |
| TC0900002003.mm.1 | NM_028546          | 1700066 | RIKEN cDNA 1700066M21 gene                      | 57377620  | 57385423  | TC0100000420.mm.1  | -0.1 | 0.2583   |
| TC0900002007.mm.1 | NM_146047          | Clptm1l | CLPTM1-like                                     | 73604002  | 73620639  | TC1300000884.mm.1  | 0.2  | 0.258383 |
| TC0900002011.mm.1 | ENSMUST00000118400 | Gm14724 | predicted gene 14724                            | 70539846  | 70539846  | TC0X00002394.mm.1  | -0.1 | 0.258702 |
| TC0900002019.mm.1 | ENSMUST00000158549 | Gm22434 | predicted gene, 22434                           | 163118227 | 163118348 | TC0100001487.mm.1  | -0.1 | 0.258721 |
| TC0900002029.mm.1 | NM_001177502       | 1700013 | RIKEN cDNA 1700013D24 gene                      | 124347593 | 124357086 | TC0600003102.mm.1  | 0.1  | 0.258731 |
| TC0900002033.mm.1 | NM_146151          | Testk2  | testis-specific kinase 2                        | 116720948 | 116805956 | TC0400004190.mm.1  | 0.1  | 0.258744 |
| TC0900002038.mm.1 | NM_022813          | Scamp2  | secretory carrier membrane protein 2            | 57560944  | 57588798  | TC0900000709.mm.1  | 0.1  | 0.258839 |
| TC0900002039.mm.1 | NM_007960          | Etv1    | ets variant gene 1                              | 38779380  | 38868215  | TC1200000348.mm.1  | 0.1  | 0.258863 |
| TC0900002043.mm.1 | ENSMUST00000082487 | Gm23140 | predicted gene, 23140                           | 47058162  | 47058268  | TC1900000716.mm.1  | -0.7 | 0.258971 |
| TC0900002044.mm.1 | NM_016967          | Olig2   | oligodendrocyte transcription factor 2          | 91225550  | 91228677  | TC1600000998.mm.1  | -0.1 | 0.259081 |
| TC0900002047.mm.1 | ENSMUST00000106038 | Gm11658 | predicted gene 11658                            | 109159187 | 109160194 | TC1100003984.mm.1  | -0.2 | 0.259556 |
| TC0900002053.mm.1 | ENSMUST00000162514 | Cyp2j7- | cytochrome P450, family 2, subfamily j, polypep | 96195197  | 96236659  | TC0400003092.mm.1  | 0.1  | 0.25959  |
| TC0900002054.mm.1 | NR_004411          | Rnu1a1  | U1a1 small nuclear RNA                          | 87422867  | 87423030  | TC1100001337.mm.1  | -0.2 | 0.259665 |
| TC0900002058.mm.1 | ENSMUST00000082761 | Gm22068 | predicted gene, 22068                           | 87426716  | 87426879  | TC1100001338.mm.1  | -0.2 | 0.259665 |
| TC0900002061.mm.1 | ENSMUST00000177653 | Gm22634 | predicted gene, 22634                           | 54710308  | 54710471  | TC1200000451.mm.1  | -0.2 | 0.259665 |
| TC0900002066.mm.1 | ENSMUST00000179675 | Gm23804 | predicted gene, 23804                           | 54714218  | 54714381  | TC1200000452.mm.1  | -0.2 | 0.259665 |
| TC0900002069.mm.1 | ENSMUST00000178333 | Gm26444 | predicted gene, 26444                           | 54729602  | 54729765  | TC1200000453.mm.1  | -0.2 | 0.259665 |
| TC0900002089.mm.1 | ENSMUST00000101973 | Gm25679 | predicted gene, 25679                           | 54719163  | 54719326  | TC1200001751.mm.1  | -0.2 | 0.259665 |
| TC0900002091.mm.1 | ENSMUST00000178469 | Gm22317 | predicted gene, 22317                           | 54738459  | 54738622  | TC1200001754.mm.1  | -0.2 | 0.259665 |
| TC0900002108.mm.1 | ENSMUST00000084007 | Gm24924 | predicted gene, 24924                           | 14647767  | 14647930  | TC1800001010.mm.1  | -0.2 | 0.259665 |
| TC0900002118.mm.1 | NR_004411          | Rnu1a1  | U1a1 small nuclear RNA                          | 0         | 0         | TSUnmapped0000016  | -0.2 | 0.259665 |
| TC0900002122.mm.1 | ENSMUST00000179155 | Gm24305 | predicted gene, 24305                           | 54734555  | 54734718  | TC1200001753.mm.1  | -0.2 | 0.25968  |
| TC0900002128.mm.1 | ENSMUST00000121202 | Gm4852  | predicted pseudogene 4852                       | 47365644  | 47366372  | TC0100002291.mm.1  | -0.1 | 0.25983  |
| TC0900002151.mm.1 | NM_012006          | Acot1   | acyl-CoA thioesterase 1                         | 84009498  | 84017674  | TC1200000798.mm.1  | 0.1  | 0.259849 |
| TC0900002152.mm.1 | ENSMUST00000083007 | Gm23238 | predicted gene, 23238                           | 18732741  | 18732904  | TC1900000326.mm.1  | -0.2 | 0.259887 |
| TC0900002155.mm.1 | ENSMUST00000083375 | Gm23244 | predicted gene, 23244                           | 113035843 | 113035934 | TC0600002909.mm.1  | -0.5 | 0.259966 |
| TC0900002156.mm.1 | ENSMUST00000181965 | Gm26528 | predicted gene, 26528                           | 22281454  | 22281736  | TC1000001857.mm.1  | 0.1  | 0.26012  |
| TC0900002159.mm.1 | NM_011454          | Serpinb | serine (or cysteine) peptidase inhibitor, clade | 32965209  | 32979067  | TC1300000362.mm.1  | -0.1 | 0.260187 |
| TC0900002161.mm.1 | ENSMUST00000119328 | Gm14648 | predicted gene 14648                            | 47900345  | 47900827  | TC0X00000423.mm.1  | -0.4 | 0.260279 |
| TC0900002164.mm.1 | ENSMUST00000083152 | Gm26495 | predicted gene, 26495                           | 116340583 | 116340719 | TC1000001337.mm.1  | 0.1  | 0.260305 |
| TC0900002165.mm.1 | NM_010700          | Ldlr    | low density lipoprotein receptor                | 21723576  | 21749919  | TC0900000204.mm.1  | 0.1  | 0.260307 |
| TC0900002168.mm.1 | ENSMUST00000082909 | Gm26207 | predicted gene, 26207                           | 25453960  | 25454063  | TC1900001296.mm.1  | 0.2  | 0.260422 |
| TC0900002171.mm.1 | ENSMUST00000104236 | Gm24279 | predicted gene, 24279                           | 98541484  | 98541614  | TC05000000951.mm.1 | 0.3  | 0.260827 |
| TC0900002174.mm.1 | NM_198104          | Tcte3   | t-complex-associated testis expressed 3         | 15027151  | 15041559  | TC1700002796.mm.1  | 0.1  | 0.26085  |
| TC0900002175.mm.1 | ENSMUST00000099736 | Vdac3-p | voltage-dependent anion channel 3, pseudogene   | 18030324  | 18031629  | TC1300001510.mm.1  | -0.2 | 0.260853 |
| TC0900002180.mm.1 | NM_139221          | Defb11  | defensin beta 11                                | 21905374  | 21906432  | TC0800001856.mm.1  | -0.1 | 0.26098  |
| TC0900002181.mm.1 | NM_010872          | Naip2   | NLR family, apoptosis inhibitory protein 2      | 100144063 | 100202122 | TC1300002530.mm.1  | 0.1  | 0.261139 |
| TC0900002197.mm.1 | NM_146175          | Zfp282  | zinc finger protein 282                         | 47877204  | 47908485  | TC0600000540.mm.1  | -0.1 | 0.261328 |
| TC0900002203.mm.1 | NM_030750          | Sgpp1   | sphingosine-1-phosphate phosphatase 1           | 75714248  | 75735729  | TC1200001939.mm.1  | -0.1 | 0.261492 |
| TC0900002207.mm.1 | NM_175677          | Trim12c | tripartite motif-containing 12C                 | 104338754 | 104353362 | TC0700003940.mm.1  | -0.3 | 0.261535 |
| TC0900002210.mm.1 | ENSMUST00000158410 | Gm22157 | predicted gene, 22157                           | 41901651  | 41901754  | TC1300000475.mm.1  | -0.2 | 0.261663 |
| TC0900002212.mm.1 | NM_011090          | Lilra6  | leukocyte immunoglobulin-like receptor, subfam  | 3908280   | 3915503   | TC0700004635.mm.1  | 0.1  | 0.261715 |
| TC0900002223.mm.1 | ENSMUST00000093713 | n-R5s33 | nuclear encoded rRNA 5S 33                      | 33001903  | 33002021  | TC1600000459.mm.1  | -0.5 | 0.261728 |
| TC0900002230.mm.1 | ENSMUST00000165535 | Gm17271 | predicted gene, 17271                           | 76797628  | 76798029  | TC1500000610.mm.1  | -0.1 | 0.261926 |
| TC0900002235.mm.1 | NM_139308          | Star7   | START domain containing 7                       | 127270218 | 127298934 | TC0200001911.mm.1  | -0.1 | 0.262378 |
| TC0900002238.mm.1 | ENSMUST00000082526 | Gm25080 | predicted gene, 25080                           | 137715658 | 137715764 | TC0300001396.mm.1  | -0.6 | 0.262438 |
| TC0900002241.mm.1 | NM_144838          | Sgtb    | small glutamine-rich tetratricopeptide repeat ( | 104109741 | 104141735 | TC1300001169.mm.1  | 0.1  | 0.262598 |
| TC0900002252.mm.1 | ENSMUST00000080097 | Gm16415 | predicted pseudogene 16415                      | 42441019  | 42441507  | TC1800000437.mm.1  | -0.4 | 0.262643 |
| TC0900002259.mm.1 | ENSMUST00000117018 | Gm24999 | predicted gene, 24999                           | 60293672  | 60293772  | TC1300000732.mm.1  | 0.2  | 0.262948 |
| TC0900002260.mm.1 | ENSMUST00000175291 | Gm23631 | predicted gene, 23631                           | 133939619 | 133939741 | TC0700004433.mm.1  | 0.2  | 0.263228 |
| TC0900002263.mm.1 | ENSMUST00000120941 | Tcp1-ps | t-complex protein 1, pseudogene 1               | 68301246  | 68303290  | TC0400002833.mm.1  | -0.1 | 0.263245 |
| TC0900002268.mm.1 | ENSMUST00000118609 | Gm13223 | predicted gene 13223                            | 145455633 | 145456379 | TC0400001862.mm.1  | -0.1 | 0.263335 |
| TC0900002271.mm.1 | NM_024467          | Zfp319  | zinc finger protein 319                         | 95326136  | 95331950  | TC0800002743.mm.1  | -0.1 | 0.263506 |
| TC0900002272.mm.1 | NM_017476          | Akap8l  | A kinase (PRKA) anchor protein 8-like           | 32321424  | 32350581  | TC1700001839.mm.1  | -0.1 | 0.263592 |
| TC0900002277.mm.1 | NM_175087          | Aqp6    | aquaporin 6                                     | 99601400  | 99605477  | TC1500001019.mm.1  | 0.1  | 0.263593 |
| TC0900002283.mm.1 | NM_009866          | Cdh11   | cadherin 11                                     | 102632995 | 102785111 | TC0800002783.mm.1  | 0.2  | 0.263736 |
| TC0900002285.mm.1 | NCBI_Gene:243461:p | Igkv7-3 | immunoglobulin kappa chain variable 7-33        | 70058632  | 70059199  | TC0600003584.mm.1  | -0.2 | 0.263964 |
| TC0900002286.mm.1 | ENSMUST00000104228 | Gm23747 | predicted gene, 23747                           | 75759859  | 75759989  | TC1500000562.mm.1  | 0.3  | 0.264201 |
| TC0900002287.mm.1 | ENSMUST00000084002 | Gm25628 | predicted gene, 25628                           | 64025948  | 64026052  | TC1500000471.mm.1  | -0.1 | 0.264221 |
| TC0900002302.mm.1 | NM_078477          | Klf16   | Kruppel-like factor 16                          | 80567121  | 80577321  | TC1000002505.mm.1  | -0.1 | 0.264221 |
| TC0900002311.mm.1 | ENSMUST00000166583 | Gm6736  | predicted gene 6736                             | 13455020  | 13455970  | TC1200001438.mm.1  | 0.3  | 0.26424  |
| TC0900002321.mm.1 | NM_001289925       | Egr3    | early growth response 3 (Egr3), transcript vari | 0         | 0         | TSUnmapped0000004  | 0.1  | 0.264245 |
| TC0900002326.mm.1 | ENSMUST00000181445 | Gm7741  | predicted gene 7741                             | 35863877  | 35864865  | TC0300000260.mm.1  | -0.1 | 0.2643   |
| TC0900002328.mm.1 | NM_020009          | Mtor    | mechanistic target of rapamycin (serine/threoni | 148448582 | 148557685 | TC0400001930.mm.1  | 0.1  | 0.264311 |
| TC0900002338.mm.1 | ENSMUST00000121461 | Gm7862  | predicted gene 7862                             | 76152336  | 76152627  | TC1200001943.mm.1  | -0.1 | 0.264345 |
| TC0900002346.mm.1 | ENSMUST00000166332 | Rpl21-p | ribosomal protein L21, pseudogene 8             | 82523539  | 82524021  | TC1800001681.mm.1  | -0.4 | 0.264434 |
| TC0900002348.mm.1 | ENSMUST00000120208 | Gm11796 | predicted gene 11796                            | 5854516   | 5855487   | TC0400002148.mm.1  | -0.2 | 0.264482 |
| TC0900002359.mm.1 | ENSMUST00000082752 | Gm25810 | predicted gene, 25810                           | 22224244  | 22224351  | TC1600000309.mm.1  | -0.5 | 0.264489 |
| TC0900002365.mm.1 | NM_176987          | Simc1   | SUMO-interacting motifs containing 1            | 54503779  | 54551290  | TC1300000626.mm.1  | -0.1 | 0.264573 |
| TC0900002366.mm.1 | ENSMUST00000082781 | Gm24207 | predicted gene, 24207                           | 105276879 | 105276986 | TC1400002656.mm.1  | 0.2  | 0.264706 |
| TC0900002367.mm.1 | NM_008341          | Igfbp1  | insulin-like growth factor binding protein 1    | 7197779   | 7202546   | TC1100000112.mm.1  | -0.1 | 0.264757 |
| TC0900002369.mm.1 | NM_027166          | Ypel5   | yippee-like 5 (Drosophila)                      | 72836704  | 72851195  | TC1700001145.mm.1  | 0.1  | 0.264782 |
| TC0900002374.mm.1 | NM_027450          | Glipr2  | GLI pathogenesis-related 2                      | 43957401  | 43979118  | TC0400000458.mm.1  | 0.1  | 0.264846 |

|                   |                     |         |                                                 |           |           |                    |      |          |
|-------------------|---------------------|---------|-------------------------------------------------|-----------|-----------|--------------------|------|----------|
| TC0900002375.mm.1 | ENSMUST00000121483  | Gm13210 | predicted gene 13210                            | 7631076   | 7631348   | TC0200000069.mm.1  | -0.2 | 0.264871 |
| TC0900002377.mm.1 | ENSMUST00000163570  | Gm7152  | predicted gene 7152                             | 42825371  | 42828470  | TC1400000432.mm.1  | -0.1 | 0.265128 |
| TC0900002380.mm.1 | NM_010594           | Kap     | kidney androgen regulated protein               | 133849854 | 133853667 | TC0600003295.mm.1  | 1.0  | 0.265233 |
| TC0900002387.mm.1 | ENSMUST00000083726  | n-R5s17 | nuclear encoded rRNA 5S 170                     | 22430331  | 22430443  | TC0500002035.mm.1  | 0.1  | 0.265248 |
| TC0900002391.mm.1 | NM_001100464        | Scgb2b2 | secretoglobulin, family 2B, member 27           | 34011919  | 34013942  | TC0700002821.mm.1  | -0.1 | 0.265465 |
| TC0900002396.mm.1 | NM_024199           | Cstf1   | cleavage stimulation factor, 3 pre-RNA, subunit | 172370681 | 172382448 | TC0200002667.mm.1  | -0.1 | 0.265545 |
| TC0900002398.mm.1 | ENSMUST000000082736 | Gm22808 | predicted gene, 22808                           | 87621014  | 87621120  | TC1600001990.mm.1  | -0.2 | 0.265625 |
| TC0900002422.mm.1 | NM_053075           | Rheb    | Ras homolog enriched in brain                   | 24802823  | 24842624  | TC0500002093.mm.1  | 0.1  | 0.265645 |
| TC0900002429.mm.1 | NR_029759           | Mir325  | microRNA 325                                    | 107761061 | 107761087 | TC1300002630.mm.1  | 0.3  | 0.265726 |
| TC0900002435.mm.1 | ENSMUST00000083116  | Gm25704 | predicted gene, 25704                           | 133008487 | 133008654 | TC0200002046.mm.1  | -0.2 | 0.265867 |
| TC0900002450.mm.1 | NM_001144992        | 2810459 | RIKEN cDNA 2810459M11 gene                      | 86045863  | 86055456  | TC0100000778.mm.1  | -0.1 | 0.265886 |
| TC0900002451.mm.1 | ENSMUST00000122804  | Gm22452 | predicted gene, 22452                           | 23663021  | 23663124  | TC1300000254.mm.1  | 0.1  | 0.266033 |
| TC0900002452.mm.1 | ENSMUST00000118888  | Gm8855  | predicted gene 8855                             | 87672992  | 87673869  | TC0300002579.mm.1  | -0.1 | 0.266062 |
| TC0900002465.mm.1 | NM_001253910        | Gm4477  | predicted gene 4477                             | 85706707  | 85713205  | TC0600002616.mm.1  | 0.3  | 0.266072 |
| TC0900002467.mm.1 | ENSMUST00000122178  | Gm14328 | predicted gene 14328                            | 74303524  | 74303931  | TC1800001587.mm.1  | -0.4 | 0.266252 |
| TC0900002472.mm.1 | ENSMUST00000104053  | Gm23272 | predicted gene, 23272                           | 143465269 | 143465397 | TC0600003394.mm.1  | 0.1  | 0.266347 |
| TC0900002502.mm.1 | ENSMUST00000104802  | Gm23937 | predicted gene, 23937                           | 4355004   | 4355096   | TC0300000012.mm.1  | 0.3  | 0.266767 |
| TC0900002503.mm.1 | ENSMUST00000104409  | Gm26017 | predicted gene, 26017                           | 86509152  | 86509225  | TC0400000865.mm.1  | -0.2 | 0.266681 |
| TC0900002506.mm.1 | NM_145929           | Gga1    | golgi associated, gamma adaptin ear containing, | 78877190  | 78894585  | TC1500000655.mm.1  | 0.1  | 0.266925 |
| TC0900002508.mm.1 | ENSMUST00000082591  | Gm26440 | predicted gene, 26440                           | 57697809  | 57697937  | TC1400000822.mm.1  | -0.8 | 0.267067 |
| TC0900002510.mm.1 | NM_016671           | Il27ra  | interleukin 27 receptor, alpha                  | 84030286  | 84042575  | TC0800002565.mm.1  | -0.1 | 0.267116 |
| TC0900002514.mm.1 | NM_024175           | Rps23   | ribosomal protein S23                           | 90923122  | 90924942  | TC1300001017.mm.1  | -0.2 | 0.267122 |
| TC0900002515.mm.1 | ENSMUST00000183799  | AC12287 | N/A                                             | 51837151  | 51837257  | TC1400000592.mm.1  | 0.3  | 0.26714  |
| TC0900002524.mm.1 | NM_026718           | Ankrd13 | ankyrin repeat domain 13a                       | 114774677 | 114806200 | TC0500001233.mm.1  | -0.2 | 0.26721  |
| TC0900002529.mm.1 | NM_007924           | Ell     | elongation factor RNA polymerase II             | 70539675  | 70592858  | TC0800000754.mm.1  | 0.1  | 0.267234 |
| TC0900002531.mm.1 | NM_133801           | Gtf2f1  | general transcription factor IIF, polypeptide 1 | 57003402  | 57011418  | TC1700002343.mm.1  | -0.2 | 0.267285 |
| TC0900002531.mm.1 | NM_178391           | Setmar  | SET domain without mariner transposase fusion   | 108065045 | 108077127 | TC0600001192.mm.1  | -0.1 | 0.267309 |
| TC0900002535.mm.1 | NM_026931           | 1810011 | RIKEN cDNA 1810011O10 gene                      | 24437615  | 24438946  | TC0800001891.mm.1  | 0.1  | 0.267332 |
| TC0900002537.mm.1 | ENSMUST00000179197  | Gm20760 | predicted gene, 20760                           | 146932742 | 146933389 | TC0400001891.mm.1  | -0.1 | 0.26736  |
| TC0900002538.mm.1 | ENSMUST00000109987  | Gm11034 | predicted gene 11034                            | 72213494  | 72213636  | TC0800002453.mm.1  | -0.3 | 0.26743  |
| TC0900002543.mm.1 | ENSMUST00000179603  | Gm23963 | predicted gene, 23963                           | 9240756   | 9240832   | TC0200002929.mm.1  | -0.3 | 0.267572 |
| TC0900002569.mm.1 | ENSMUST00000157648  | Gm23123 | predicted gene, 23123                           | 26223502  | 26223645  | TC1700000408.mm.1  | -0.2 | 0.267783 |
| TC0900002580.mm.1 | ENSMUST00000158230  | Gm24724 | predicted gene, 24724                           | 53159757  | 53159863  | TC1900001667.mm.1  | 0.1  | 0.267842 |
| TC0900002589.mm.1 | NM_024216           | Gpn3    | GPN-loop GTPase 3                               | 122371876 | 122382902 | TC0500001390.mm.1  | -0.1 | 0.267884 |
| TC0900002593.mm.1 | ENSMUST00000104462  | Gm23320 | predicted gene, 23320                           | 75886083  | 75886209  | TC0X00000752.mm.1  | -0.1 | 0.268    |
| TC0900002594.mm.1 | NM_133796           | Arhgdia | Rho GDP dissociation inhibitor (GDI) alpha      | 120577235 | 120581624 | TC1100004217.mm.1  | 0.2  | 0.268131 |
| TC0900002597.mm.1 | ENSMUST00000062242  | Gm8181  | predicted gene 8181                             | 43171159  | 43171827  | TC1800000442.mm.1  | 0.2  | 0.268268 |
| TC0900002629.mm.1 | ENSMUST00000178619  | Eif4a-p | eukaryotic translation initiation factor 4A, ps | 60703918  | 60705656  | TC0100000475.mm.1  | -0.2 | 0.268513 |
| TC0900002630.mm.1 | NM_009197           | Slc16a2 | solute carrier family 16 (monocarboxylic acid t | 103697414 | 103821988 | TC0X00002783.mm.1  | 0.1  | 0.268566 |
| TC0900002635.mm.1 | NM_027870           | Armcx3  | armadillo repeat containing, X-linked 3         | 134756568 | 134761456 | TC0X00001288.mm.1  | 0.0  | 0.268846 |
| TC0900002638.mm.1 | NR_039566           | Mir3473 | microRNA 3473c                                  | 191998554 | 191998634 | TC0100003824.mm.1  | 0.1  | 0.268855 |
| TC0900002640.mm.1 | NM_026758           | Mphosph | M phase phosphoprotein 6                        | 117791644 | 117801929 | TC0800003015.mm.1  | -0.1 | 0.269042 |
| TC0900002641.mm.1 | ENSMUST00000074828  | Rpl21-p | ribosomal protein L21, pseudogene 6             | 55915403  | 55915870  | TC1700002305.mm.1  | -0.4 | 0.26905  |
| TC0900002644.mm.1 | NM_001003950        | Rab3ip  | RAB3A interacting protein                       | 116905784 | 116950380 | TC1000002916.mm.1  | -0.1 | 0.269068 |
| TC0900002645.mm.1 | ENSMUST00000104397  | Gm24375 | predicted gene, 24375                           | 56521372  | 56521503  | TC0800002243.mm.1  | 0.2  | 0.269212 |
| TC0900002651.mm.1 | NM_134021           | Pnpo    | pyridoxine 5-phosphate oxidase                  | 96937816  | 96944019  | TC1100003629.mm.1  | 0.1  | 0.269344 |
| TC0900002682.mm.1 | ENSMUST00000180111  | Gm25672 | predicted gene, 25672                           | 106072327 | 106072433 | TC0500002908.mm.1  | -0.6 | 0.269379 |
| TC0900002684.mm.1 | ENSMUST00000120603  | Gm14465 | predicted gene 14465                            | 79161029  | 79161595  | TC0200003826.mm.1  | -0.1 | 0.269462 |
| TC0900002688.mm.1 | NM_026780           | Syf2    | SYF2 homolog, RNA splicing factor (S. cerevisia | 134930898 | 134937548 | TC0400001647.mm.1  | -0.1 | 0.269578 |
| TC0900002691.mm.1 | NM_011187           | Psmb7   | proteasome (prosome, macropain) subunit, beta   | 38588036  | 38644087  | TC0200003421.mm.1  | -0.2 | 0.269746 |
| TC0900002696.mm.1 | NM_001252639        | Tbc1d7  | TBC1 domain family, member 7                    | 43151740  | 43171501  | TC1300001877.mm.1  | 0.1  | 0.269998 |
| TC0900002711.mm.1 | NM_172162           | Hinfp   | histone H4 transcription factor                 | 44295673  | 44305671  | TC0900002155.mm.1  | -0.1 | 0.270145 |
| TC0900002720.mm.1 | NM_147101           | Olfr549 | olfactory receptor 549                          | 102554286 | 102555236 | TC0700001459.mm.1  | -0.1 | 0.270265 |
| TC0900002727.mm.1 | ENSMUST00000175690  | Gm20650 | predicted gene 20650                            | 126891622 | 126897236 | TC0700001823.mm.1  | 0.1  | 0.270501 |
| TC0900002731.mm.1 | NR_028281           | Snord43 | small nucleolar RNA, C/D box 43                 | 80082859  | 80082906  | TC1500001899.mm.1  | -0.3 | 0.270599 |
| TC0900002737.mm.1 | NM_001162926        | Fam84b  | family with sequence similarity 84, member B    | 60818996  | 60825080  | TC1500001606.mm.1  | 0.1  | 0.27068  |
| TC0900002747.mm.1 | ENSMUST00000178842  | Gm26239 | predicted gene, 26239                           | 93807298  | 93807404  | TC1000001142.mm.1  | -0.6 | 0.270781 |
| TC0900002762.mm.1 | ENSMUST00000120419  | Gm13488 | predicted gene 13488                            | 50521682  | 50521860  | TC0200003506.mm.1  | -0.2 | 0.270949 |
| TC0900002769.mm.1 | ENSMUST00000178716  | Gm10590 | predicted gene 10590                            | 63267     | 63692     | TC4_JH584294_rand  | 0.1  | 0.270954 |
| TC0900002772.mm.1 | ENSMUST00000118197  | Gm14888 | predicted gene 14888                            | 58845560  | 58845733  | TC0X00000542.mm.1  | 0.5  | 0.271037 |
| TC0900002773.mm.1 | NM_001011790        | Olfr138 | olfactory receptor 1382                         | 49535187  | 49536122  | TC1100000516.mm.1  | -0.1 | 0.271158 |
| TC0900002774.mm.1 | XR_035730           | 6030426 | RIKEN cDNA 6030426L16 gene                      | 21729738  | 21784556  | TC1200001498.mm.1  | -0.1 | 0.271239 |
| TC0900002776.mm.1 | NM_001080965        | Aurkc   | aurora kinase C                                 | 6995385   | 7003091   | TC0700000099.mm.1  | -0.1 | 0.271502 |
| TC0900002777.mm.1 | NM_001004141        | Cyp2j11 | cytochrome P450, family 2, subfamily j, polypep | 96294508  | 96348680  | TC0400003094.mm.1  | 0.4  | 0.271618 |
| TC0900002778.mm.1 | ENSMUST00000184477  | mmu-mir | mmu-mir-6412                                    | 122648339 | 122648435 | TC1000001510.mm.1  | -0.1 | 0.271644 |
| TC0900002779.mm.1 | ENSMUST00000157175  | Gm25569 | predicted gene, 25569                           | 165270046 | 165270176 | TC02000005144.mm.1 | -0.2 | 0.271666 |
| TC0900002780.mm.1 | NM_027817           | Grap    | GRB2-related adaptor protein                    | 61653265  | 61672784  | TC1100000785.mm.1  | -0.3 | 0.271816 |
| TC0900002782.mm.1 | NM_177470           | Acaa2   | acetyl-Coenzyme A acyltransferase 2 (mitochondr | 74779197  | 74806208  | TC1800000794.mm.1  | 0.3  | 0.272065 |
| TC0900002800.mm.1 | XR_105198           | Gm20359 | predicted gene, 20359                           | 35375741  | 35388139  | TC0800000424.mm.1  | -0.1 | 0.272125 |
| TC0900002806.mm.1 | NM_011592           | Timm44  | translocase of inner mitochondrial membrane 44  | 4259731   | 4275913   | TC0800001633.mm.1  | -0.1 | 0.272277 |
| TC0900002810.mm.1 | ENSMUST00000121351  | Gm6175  | predicted gene 6175                             | 100585009 | 100585408 | TC0X00000955.mm.1  | -0.1 | 0.272451 |
| TC0900002824.mm.1 | ENSMUST00000118822  | Rpl7l1- | ribosomal protein L7-like 1, pseudogene 1       | 60971990  | 60972714  | TC0X00002319.mm.1  | -0.1 | 0.272583 |
| TC0900002848.mm.1 | NM_027727           | Dym     | dymeclin                                        | 75018772  | 75286966  | TC1800000802.mm.1  | 0.1  | 0.272664 |
| TC0900002873.mm.1 | NM_001037665        | Zfp1    | zinc finger protein 1                           | 111643443 | 111671011 | TC0800001336.mm.1  | -0.1 | 0.272861 |
| TC0900002875.mm.1 | ENSMUST00000082785  | Gm25930 | predicted gene, 25930                           | 53390402  | 53390508  | TC1100000602.mm.1  | -0.7 | 0.272888 |
| TC0900002882.mm.1 | ENSMUST00000179484  | Gm25618 | predicted gene, 25618                           | 24362438  | 24362544  | TC1700001625.mm.1  | -0.6 | 0.272914 |
| TC0900002884.mm.1 | NM_134221           | Vmn1r20 | vomeronasal 1 receptor 201                      | 22474617  | 22475521  | TC1300000209.mm.1  | 0.1  | 0.272998 |
| TC0900002908.mm.1 | NM_008796           | Pctp    | phosphatidylcholine transfer protein            | 89982665  | 90002894  | TC1100003523.mm.1  | 0.1  | 0.273096 |

|                   |                    |         |                                                 |           |           |                   |      |          |
|-------------------|--------------------|---------|-------------------------------------------------|-----------|-----------|-------------------|------|----------|
| TC0900002915.mm.1 | ENSMUST00000083397 | Gm24927 | predicted gene, 24927                           | 17341906  | 17342012  | TC1600001288.mm.1 | -0.2 | 0.273145 |
| TC0900002922.mm.1 | ENSMUST00000050774 | Gm9816  | predicted pseudogene 9816                       | 62716953  | 62718810  | TC1600000785.mm.1 | -0.1 | 0.273176 |
| TC0900002950.mm.1 | NM_010380          | H2-D1   | histocompatibility 2, D region locus 1          | 35262730  | 35267499  | TC1700002790.mm.1 | 0.3  | 0.273342 |
| TC0900002963.mm.1 | ENSMUST00000101103 | Tnfrsf1 | tumor necrosis factor receptor superfamily, mem | 61126755  | 61149372  | TC1100000774.mm.1 | -0.1 | 0.27339  |
| TC0900002993.mm.1 | NM_024236          | Qdpr    | quinoid dihydropteridine reductase              | 45434032  | 45450235  | TC0500002343.mm.1 | 0.1  | 0.273631 |
| TC0900002996.mm.1 | NM_008327          | Ifi202b | interferon activated gene 202B                  | 173962568 | 174031755 | TC0100003599.mm.1 | 0.1  | 0.273649 |
| TC0900002997.mm.1 | ENSMUST00000116975 | Gm22679 | predicted gene, 22679                           | 29301480  | 29301579  | TC0100000185.mm.1 | 0.1  | 0.273722 |
| TC0900003002.mm.1 | ENSMUST00000178130 | Gm23402 | predicted gene, 23402                           | 165809636 | 165809742 | TC0100003454.mm.1 | -0.6 | 0.273723 |
| TC0900003004.mm.1 | NM_178889          | Zscan29 | zinc finger SCAN domains 29                     | 121157427 | 121171149 | TC0200004481.mm.1 | -0.1 | 0.273965 |
| TC0900003008.mm.1 | NM_031197          | Slc2a2  | solute carrier family 2 (facilitated glucose tr | 28697903  | 28728361  | TC0300000180.mm.1 | 0.2  | 0.27409  |
| TC0900003011.mm.1 | ENSMUST00000179670 | Gm22995 | predicted gene, 22995                           | 13888537  | 13888643  | TC1000001779.mm.1 | -0.7 | 0.274106 |
| TC0900003016.mm.1 | ENSMUST00000157370 | Gm25054 | predicted gene, 25054                           | 83721296  | 83721392  | TC0600000936.mm.1 | 0.1  | 0.274266 |
| TC0900003033.mm.1 | NM_019977          | Miox    | myo-inositol oxygenase                          | 89334398  | 89337015  | TC1500000870.mm.1 | 0.5  | 0.274338 |
| TC0900003037.mm.1 | NM_024441          | Hspb2   | heat shock protein 2                            | 50751072  | 50752354  | TC0900002277.mm.1 | 0.0  | 0.274476 |
| TC0900003038.mm.1 | ENSMUST00000158401 | Gm25014 | predicted gene, 25014                           | 13283115  | 13283217  | TC0800001734.mm.1 | -0.1 | 0.274632 |
| TC0900003042.mm.1 | NM_011712          | Wbp5    | WW domain binding protein 5                     | 136245079 | 136247139 | TC0X00001322.mm.1 | -0.2 | 0.274724 |
| TC0900003051.mm.1 | NM_019728          | Defb4   | defensin beta 4                                 | 19198704  | 19201547  | TC0800000180.mm.1 | 0.1  | 0.274731 |
| TC0900003055.mm.1 | ENSMUST00000116887 | Gm23019 | predicted gene, 23019                           | 78361097  | 78361189  | TC1300000952.mm.1 | 0.3  | 0.274754 |
| TC0900003062.mm.1 | NM_008186          | Gtf2h1  | general transcription factor II H, polypeptide  | 46796094  | 46823800  | TC0700000879.mm.1 | -0.1 | 0.27485  |
| TC0900003064.mm.1 | ENSMUST00000184093 | RP24-19 | N/A                                             | 14965334  | 14965622  | TC0700002396.mm.1 | -0.2 | 0.275015 |
| TC0900003068.mm.1 | NM_153551          | Dennd1c | DENN/MADD domain containing 1C                  | 57066055  | 57078510  | TC1700002347.mm.1 | -0.2 | 0.275129 |
| TC0900003074.mm.1 | NM_153796          | Peo1    | progressive external ophthalmoplegia 1 (human)  | 45005692  | 45012762  | TC1900000661.mm.1 | -0.1 | 0.275368 |
| TC0900003081.mm.1 | NM_010496          | Id2     | inhibitor of DNA binding 2                      | 25093799  | 25096092  | TC1200001544.mm.1 | -0.2 | 0.275383 |
| TC0900003083.mm.1 | XM_001477767       | Gm20925 | predicted gene, 20925                           | 23306767  | 23307480  | TC0Y00000064.mm.1 | 0.2  | 0.275576 |
| TC0900003084.mm.1 | NM_183195          | Marveld | MARVEL (membrane-associating) domain contai     | 42147389  | 42151703  | TC1900000610.mm.1 | 0.1  | 0.275651 |
| TC0900003097.mm.1 | ENSMUST00000104013 | Gm25614 | predicted gene, 25614                           | 58650268  | 58650400  | TC1400002154.mm.1 | -0.1 | 0.275767 |
| TC0900003098.mm.1 | NM_026998          | Snx6    | sorting nexin 6                                 | 54746349  | 54795703  | TC1200001755.mm.1 | -0.1 | 0.275942 |
| TC0900003103.mm.1 | NM_007505          | Atp5a1  | ATP synthase, H+ transporting, mitochondrial F1 | 77773729  | 77782869  | TC1800000833.mm.1 | 0.3  | 0.275964 |
| TC0900003109.mm.1 | ENSMUST00000097644 | Hdac4   | histone deacetylase 4                           | 91928785  | 91931176  | TC0100002805.mm.1 | -0.1 | 0.276144 |
| TC0900003110.mm.1 | ENSMUST00000175406 | Gm23369 | predicted gene, 23369                           | 32593469  | 32593573  | TC0200003306.mm.1 | -0.5 | 0.276228 |
| TC0900003112.mm.1 | NM_009910          | Cxcr3   | chemokine (C-X-C motif) receptor 3              | 101731535 | 101734269 | TC0X00002727.mm.1 | -0.1 | 0.276259 |
| TC0900003116.mm.1 | ENSMUST00000032517 | Clec2j  | C-type lectin domain family 2, member J         | 128652438 | 128657032 | TC0600003212.mm.1 | -0.2 | 0.276275 |
| TC0900003120.mm.1 | ENSMUST00000083036 | Gm23690 | predicted gene, 23690                           | 181813607 | 181813700 | TC0100003696.mm.1 | -0.7 | 0.276338 |
| TC0900003122.mm.1 | ENSMUST00000083244 | Gm22126 | predicted gene, 22126                           | 35662135  | 35662276  | TC1300000406.mm.1 | -0.4 | 0.276425 |
| TC0900003133.mm.1 | ENSMUST00000158384 | Gm23858 | predicted gene, 23858                           | 121135191 | 121135296 | TC0200004480.mm.1 | -0.1 | 0.276466 |
| TC0900003142.mm.1 | NM_028746          | Slc7a13 | solute carrier family 7, (cationic amino acid t | 19848725  | 19842218  | TC0400000167.mm.1 | 0.1  | 0.276485 |
| TC0900003162.mm.1 | ENSMUST00000083374 | Gm24136 | predicted gene, 24136                           | 96422733  | 96422897  | TC0300000941.mm.1 | -0.5 | 0.276648 |
| TC0900003168.mm.1 | NM_028070          | Alkbh4  | alkB, alkylation repair homolog 4 (E. coli)     | 136136146 | 136141615 | TC0500001599.mm.1 | -0.1 | 0.276654 |
| TC0900003169.mm.1 | ENSMUST00000099835 | Olfr116 | olfactory receptor 1163                         | 88070365  | 88071407  | TC0200004006.mm.1 | 0.1  | 0.276825 |
| TC0900003172.mm.1 | ENSMUST00000157262 | Gm23598 | predicted gene, 23598                           | 150883723 | 150883866 | TC0200002231.mm.1 | -0.2 | 0.27689  |
| TC0900003173.mm.1 | NM_001161410       | Trappc1 | trafficking protein particle complex 12         | 28690628  | 28750453  | TC0200001569.mm.1 | -0.1 | 0.27732  |
| TC0900003176.mm.1 | ENSMUST00000178559 | Gm21800 | predicted gene, 21800                           | 41406498  | 41407040  | TC0Y00000133.mm.1 | 0.1  | 0.27747  |
| TC0900003179.mm.1 | ENSMUST00000117367 | Gm12892 | predicted gene 12892                            | 122008193 | 122009338 | TC0400001374.mm.1 | 0.1  | 0.277553 |
| TC0900003182.mm.1 | NM_021028          | Tk2     | thymidine kinase 2, mitochondrial               | 104226691 | 104248558 | TC0800002797.mm.1 | 0.2  | 0.277609 |
| TC0900003188.mm.1 | NM_029751          | Rpl18a  | ribosomal protein L18A                          | 70894722  | 70897443  | TC0800002412.mm.1 | -0.1 | 0.277632 |
| TC0900003189.mm.1 | NM_019726          | Gps2    | G protein pathway suppressor 2                  | 69913888  | 69916591  | TC1100000929.mm.1 | -0.1 | 0.277655 |
| TC0900003191.mm.1 | ENSMUST00000083864 | Gm25518 | predicted gene, 25518                           | 25006152  | 25006258  | TC0200003125.mm.1 | -0.4 | 0.277706 |
| TC0900003199.mm.1 | ENSMUST00000158698 | Gm25978 | predicted gene, 25978                           | 23626656  | 23626745  | TC0400002302.mm.1 | 0.1  | 0.277781 |
| TC0900003220.mm.1 | ENSMUST00000120117 | Gm13181 | predicted gene 13181                            | 3686362   | 3687430   | TC0200000014.mm.1 | -0.1 | 0.277939 |
| TC0900003225.mm.1 | ENSMUST00000122420 | Gm8577  | predicted gene 8577                             | 154774453 | 154775438 | TC0X00001572.mm.1 | -0.1 | 0.278036 |
| TC0900003229.mm.1 | ENSMUST00000104528 | Gm25725 | predicted gene, 25725                           | 141386495 | 141386624 | TC0700004535.mm.1 | 0.1  | 0.278044 |
| TC0900003233.mm.1 | NM_001135115       | Gm12250 | predicted gene 12250                            | 58183843  | 58190198  | TC1100000681.mm.1 | -0.1 | 0.278161 |
| TC0900003234.mm.1 | ENSMUST00000157182 | Gm25559 | predicted gene, 25559                           | 117570134 | 117570207 | TC0400001294.mm.1 | 0.1  | 0.278215 |
| TC0900003236.mm.1 | ENSMUST00000176997 | Vmn1r-p | vomeronasal 1 receptor, pseudogene 149          | 21269288  | 21269470  | TC1700001552.mm.1 | 0.1  | 0.278225 |
| TC0900003237.mm.1 | ENSMUST00000093636 | Gm23947 | predicted gene, 23947                           | 88392826  | 88392932  | TC1700002713.mm.1 | -0.6 | 0.278289 |
| TC0900003240.mm.1 | ENSMUST00000100697 | Gm3633  | predicted gene 3633                             | 42634627  | 42641917  | TC1400001837.mm.1 | 0.1  | 0.278313 |
| TC0900003241.mm.1 | NM_011897          | Spry2   | sprouty homolog 2 (Drosophila)                  | 105891947 | 105896819 | TC1400002666.mm.1 | 0.1  | 0.278419 |
| TC0900003248.mm.1 | NR_039562          | Mir5103 | microRNA 5103                                   | 34433121  | 34433199  | TC0100002150.mm.1 | -0.2 | 0.278463 |
| TC0900003249.mm.1 | NM_030685          | Serp1   | stress-associated endoplasmic reticulum protein | 58521969  | 58525884  | TC0300002042.mm.1 | -0.1 | 0.278508 |
| TC0900003275.mm.1 | ENSMUST00000179451 | Gm26432 | predicted gene, 26432                           | 59496169  | 59496247  | TC0700003208.mm.1 | -0.1 | 0.27856  |
| TC0900003276.mm.1 | ENSMUST00000184585 | AC13224 | N/A                                             | 30333291  | 30333397  | TC0100002115.mm.1 | 0.3  | 0.27887  |
| TC0900003303.mm.1 | NM_025427          | Rgcc    | regulator of cell cycle                         | 79288750  | 79301645  | TC1400002487.mm.1 | 0.2  | 0.278881 |
| TC0900003306.mm.1 | NM_026228          | Slc39a8 | solute carrier family 39 (metal ion transporter | 135825279 | 135888572 | TC0300001378.mm.1 | 0.1  | 0.278973 |
| TC0900003307.mm.1 | NM_025969          | Timm21  | tranlocase of inner mitochondrial membrane 21   | 84947294  | 84951524  | TC1800001719.mm.1 | -0.2 | 0.279094 |
| TC0900003309.mm.1 | NR_002900          | Snora69 | small nucleolar RNA, H/ACA box 69               | 37082912  | 37083042  | TC0X00002058.mm.1 | -0.8 | 0.27911  |
| TC0900003312.mm.1 | NM_011740          | Ywhaz   | tyrosine 3-monooxygenase/tryptophan 5-monoc     | 36770261  | 36802984  | TC1500001384.mm.1 | -0.1 | 0.279215 |
| TC0900003313.mm.1 | NM_025407          | Uqcrc1  | ubiquinol-cytochrome c reductase core protein 1 | 108936648 | 108949641 | TC0900001427.mm.1 | 0.3  | 0.279523 |
| TC0900003318.mm.1 | ENSMUST00000083286 | Gm25794 | predicted gene, 25794                           | 79703484  | 79703590  | TC1000002476.mm.1 | -0.5 | 0.279627 |
| TC0900003319.mm.1 | NCBI_Gene:432709:p | Ighv8-9 | immunoglobulin heavy variable V8-9              | 115468331 | 115468632 | TC1200002484.mm.1 | -0.5 | 0.280086 |
| TC0900003322.mm.1 | NM_018758          | Apba3   | amyloid beta (A4) precursor protein-binding, fa | 81268172  | 81273247  | TC1200000891.mm.1 | 0.1  | 0.280086 |
| TC0900003331.mm.1 | ENSMUST00000119811 | Gm7189  | predicted pseudogene 7189                       | 40000782  | 40001210  | TC0X00002100.mm.1 | -0.1 | 0.280212 |
| TC0900003337.mm.1 | NCBI_Gene:243451:p | Igkv4-8 | immunoglobulin kappa variable 4-86              | 68910411  | 68910938  | TC0600003551.mm.1 | -0.8 | 0.280333 |
| TC0900003341.mm.1 | NM_009251          | Serpina | serine (or cysteine) peptidase inhibitor, clade | 104236242 | 104241939 | TC1200002525.mm.1 | -0.2 | 0.280602 |
| TC0900003343.mm.1 | ENSMUST00000082557 | Gm22061 | predicted gene, 22061                           | 98946444  | 98946550  | TC1100001588.mm.1 | -0.6 | 0.280692 |
| TC0900003344.mm.1 | NM_009531          | Xpc     | xeroderma pigmentosum, complementation gro      | 91489305  | 91515888  | TC0600002730.mm.1 | -0.1 | 0.280732 |
| TC0M00000001.mm.1 | NM_147070          | Olfr603 | olfactory receptor 603                          | 103383062 | 103384000 | TC0700003887.mm.1 | 0.1  | 0.280893 |
| TC0M00000003.mm.1 | ENSMUST00000183673 | GNAS-AS | GNAS antisense RNA 1 conserved region 5         | 174295337 | 174295461 | TC0200002703.mm.1 | -0.1 | 0.280962 |
| TC0M00000005.mm.1 | NM_026428          | Dcxr    | dicarbonyl L-xylulose reductase                 | 120724546 | 120727281 | TC1100004228.mm.1 | 0.1  | 0.28102  |

|                   |                    |         |                                                 |           |           |                   |      |          |
|-------------------|--------------------|---------|-------------------------------------------------|-----------|-----------|-------------------|------|----------|
| TCOM00000006.mm.1 | ENSMUST00000180263 | Gm25327 | predicted gene, 25327                           | 120143644 | 120143750 | TC0600003037.mm.1 | -0.5 | 0.281081 |
| TCOM00000007.mm.1 | NM_001142441       | Gm10094 | predicted gene 10094                            | 95825354  | 95826156  | TC0800001147.mm.1 | -0.2 | 0.281111 |
| TCOM00000008.mm.1 | NM_172594          | Dhx29   | DEAH (Asp-Glu-Ala-His) box polypeptide 29       | 112927720 | 112969432 | TC1300001273.mm.1 | -0.1 | 0.281112 |
| TCOM00000009.mm.1 | ENSMUST00000178125 | SNORA43 | Small nucleolar RNA SNORA43                     | 74635214  | 74635351  | TC0400000783.mm.1 | 0.1  | 0.281133 |
| TCOM00000010.mm.1 | NM_018791          | Zfp108  | zinc finger protein 108                         | 24254794  | 24262445  | TC0700000374.mm.1 | -0.1 | 0.281286 |
| TCOM00000011.mm.1 | NM_001011830       | Olfr119 | olfactory receptor 119                          | 37696664  | 37701818  | TC1700000779.mm.1 | 0.1  | 0.281645 |
| TCOM00000012.mm.1 | ENSMUST00000157635 | Gm24780 | predicted gene, 24780                           | 33393057  | 33393199  | TC0300001811.mm.1 | -0.2 | 0.28169  |
| TCOM00000013.mm.1 | ENSMUST00000173442 | Gm20505 | predicted gene 20505                            | 8718833   | 8720540   | TC0700002268.mm.1 | 0.1  | 0.281719 |
| TCOM00000014.mm.1 | ENSMUST00000180296 | Gm20435 | predicted gene 20435                            | 9458656   | 9460363   | TC0700002290.mm.1 | 0.1  | 0.281719 |
| TCOM00000015.mm.1 | NR_030473          | Mir669c | microRNA 669c                                   | 91110229  | 91123337  | TC1200000942.mm.1 | 0.3  | 0.281783 |
| TCOM00000017.mm.1 | ENSMUST00000158614 | Gm22200 | predicted gene, 22200                           | 34941234  | 34941300  | TC1800001164.mm.1 | -0.1 | 0.281915 |
| TCOM00000020.mm.1 | NM_153780          | 2610044 | RIKEN cDNA 2610044O15 gene                      | 129216354 | 129234046 | TC0800003217.mm.1 | -0.1 | 0.282023 |
| TCOM00000021.mm.1 | NM_027898          | Gramd1a | GRAM domain containing 1A                       | 31130127  | 31151050  | TC0700002792.mm.1 | -0.1 | 0.282111 |
| TCOM00000022.mm.1 | XM_003688810       | Gm21083 | predicted gene, 21083                           | 15577337  | 15582097  | TC0500000109.mm.1 | 0.1  | 0.282132 |
| TCOM00000023.mm.1 | NM_026858          | Xrcc6bp | XRCC6 binding protein 1                         | 126868427 | 126901371 | TC1000003090.mm.1 | -0.1 | 0.282236 |
| TCOM00000024.mm.1 | NR_035420          | Mir467f | microRNA 467f                                   | 69635400  | 69635519  | TC1100003053.mm.1 | 0.2  | 0.282263 |
| TCOM00000025.mm.1 | NM_027360          | 2010107 | RIKEN cDNA 2010107E04 gene                      | 111961375 | 111966977 | TC1200002421.mm.1 | -0.3 | 0.282452 |
| TCOM00000028.mm.1 | XM_620107          | Gm13213 | predicted gene 13213                            | 133638210 | 133638683 | TC0400003709.mm.1 | -0.5 | 0.282487 |
| TCOM00000029.mm.1 | NM_146655          | Olfr441 | olfactory receptor 441                          | 43115744  | 43116676  | TC0600000479.mm.1 | -0.1 | 0.282547 |
| TCOX00000014.mm.1 | NM_009315          | Taf6    | TAF6 RNA polymerase II, TATA box binding prote  | 138178617 | 138187451 | TC0500003474.mm.1 | -0.1 | 0.282699 |
| TCOX00000018.mm.1 | NM_019415          | Slc12a3 | solute carrier family 12, member 3              | 94329192  | 94366222  | TC0800001103.mm.1 | 0.5  | 0.28273  |
| TCOX00000020.mm.1 | ENSMUST00000104564 | Gm23530 | predicted gene, 23530                           | 47800673  | 47800809  | TC1500000365.mm.1 | -0.2 | 0.28274  |
| TCOX00000030.mm.1 | NM_008369          | Il3ra   | interleukin 3 receptor, alpha chain             | 14346495  | 14355490  | TC1400000112.mm.1 | 0.0  | 0.282876 |
| TCOX00000035.mm.1 | NM_028295          | Pdia5   | protein disulfide isomerase associated 5        | 35397312  | 35490873  | TC1600001548.mm.1 | 0.1  | 0.282936 |
| TCOX00000036.mm.1 | NR_029640          | Mir290  | microRNA 290                                    | 3218626   | 3218708   | TC0700000003.mm.1 | 0.1  | 0.283003 |
| TCOX00000044.mm.1 | ENSMUST00000180253 | Gm6100  | predicted gene 6100                             | 34307301  | 34307687  | TC0800002027.mm.1 | -0.2 | 0.283206 |
| TCOX00000045.mm.1 | NM_009987          | Cx3cr1  | chemokine (C-X3-C) receptor 1                   | 119901616 | 120068296 | TC0900003248.mm.1 | -0.1 | 0.283392 |
| TCOX00000046.mm.1 | ENSMUST00000180018 | Gm21741 | predicted gene, 21741                           | 83715099  | 83715782  | TC0Y00000512.mm.1 | 0.1  | 0.283403 |
| TCOX00000065.mm.1 | NM_027843          | Arl14   | ADP-ribosylation factor-like 14                 | 69222419  | 69223618  | TC0300000579.mm.1 | 0.1  | 0.283524 |
| TCOX00000066.mm.1 | NM_028634          | Cby1    | chibby homolog 1 (Drosophila)                   | 79659227  | 79667661  | TC1500000677.mm.1 | -0.1 | 0.283879 |
| TCOX00000067.mm.1 | NM_153422          | Pde5a   | phosphodiesterase 5A, cGMP-specific             | 122729158 | 122859374 | TC0300001249.mm.1 | -0.1 | 0.283971 |
| TCOX00000071.mm.1 | NM_001163085       | Map3k15 | mitogen-activated protein kinase kinase         | 159988433 | 160123351 | TC0X00001629.mm.1 | 0.1  | 0.283974 |
| TCOX00000076.mm.1 | NM_025274          | Dppa5a  | developmental pluripotency associated 5A        | 78367052  | 78368199  | TC0900002720.mm.1 | -0.1 | 0.283997 |
| TCOX00000080.mm.1 | ENSMUST00000121568 | Gm6977  | predicted gene 6977                             | 90744546  | 90745062  | TC0X00002608.mm.1 | 0.2  | 0.284203 |
| TCOX00000098.mm.1 | ENSMUST00000083719 | Gm23105 | predicted gene, 23105                           | 108363665 | 108363798 | TC1000001271.mm.1 | -0.4 | 0.284351 |
| TCOX00000109.mm.1 | NM_025836          | Plin3   | perilipin 3                                     | 56278962  | 56290511  | TC1700002321.mm.1 | 0.2  | 0.28454  |
| TCOX00000100.mm.1 | ENSMUST00000117877 | Gm11873 | predicted gene 11873                            | 20391096  | 20392399  | TC0400000171.mm.1 | -0.2 | 0.284561 |
| TCOX00000112.mm.1 | ENSMUST00000177920 | Gm22911 | predicted gene, 22911                           | 38615375  | 38615481  | TC1000002014.mm.1 | -0.4 | 0.284761 |
| TCOX00000126.mm.1 | ENSMUST00000121022 | Gm11836 | predicted gene 11836                            | 14433891  | 14434337  | TC0400000124.mm.1 | -0.3 | 0.284807 |
| TCOX00000129.mm.1 | NM_001256066       | Scgb1b2 | secretoglobulin, family 1B, member 29           | 32441525  | 32442844  | TC0700000597.mm.1 | 0.1  | 0.284906 |
| TCOX00000130.mm.1 | ENSMUST00000117021 | Gm23335 | predicted gene, 23335                           | 55966856  | 55966949  | TC1800001359.mm.1 | 0.3  | 0.284923 |
| TCOX00000131.mm.1 | XR_141487          | Gm19578 | predicted gene, 19578                           | 77658872  | 77662794  | TC1800001629.mm.1 | -0.1 | 0.285041 |
| TCOX00000146.mm.1 | NM_001253848       | Cbl1l   | Casitas B-lineage lymphoma-like 1               | 31484829  | 31499616  | TC1200001594.mm.1 | -0.1 | 0.285082 |
| TCOX00000148.mm.1 | ENSMUST00000121388 | Olfr139 | olfactory receptor 1397, pseudogene 1           | 108687074 | 108688035 | TC1100003978.mm.1 | 0.1  | 0.285147 |
| TCOX00000151.mm.1 | NCBI_Gene:381782:p | Igkv4-5 | immunoglobulin kappa variable 4-50              | 69700767  | 69701287  | TC0600003575.mm.1 | -0.7 | 0.285474 |
| TCOX00000153.mm.1 | NM_001177832       | Gm10324 | predicted gene 10324                            | 66113453  | 66164861  | TC1300000803.mm.1 | 0.0  | 0.285539 |
| TCOX00000156.mm.1 | ENSMUST00000184385 | RP23-26 | N/A                                             | 76658075  | 76658450  | TC0900001028.mm.1 | -0.1 | 0.28566  |
| TCOX00000162.mm.1 | NM_019449          | Unc93b1 | unc-93 homolog B1 (C. elegans)                  | 3935186   | 3949340   | TC1900000019.mm.1 | 0.3  | 0.285662 |
| TCOX00000163.mm.1 | ENSMUST00000175475 | Gm25247 | predicted gene, 25247                           | 36430611  | 36430700  | TC0700000676.mm.1 | -0.3 | 0.286085 |
| TCOX00000164.mm.1 | ENSMUST00000164167 | Gm7535  | predicted gene 7535                             | 17911039  | 17911947  | TC1700001524.mm.1 | -0.2 | 0.286168 |
| TCOX00000169.mm.1 | ENSMUST00000158780 | Gm24876 | predicted gene, 24876                           | 75745849  | 75745940  | TC1400002429.mm.1 | 0.1  | 0.28617  |
| TCOX00000170.mm.1 | NM_133807          | Lrrc59  | leucine rich repeat containing 59               | 94629767  | 94645216  | TC1100001442.mm.1 | 0.2  | 0.286256 |
| TCOX00000176.mm.1 | ENSMUST00000158499 | Gm26402 | predicted gene, 26402                           | 75613157  | 75613269  | TC1000002378.mm.1 | 0.1  | 0.286326 |
| TCOX00000178.mm.1 | ENSMUST00000175510 | Gm22932 | predicted gene, 22932                           | 10273750  | 10273821  | TC1600000113.mm.1 | -0.1 | 0.286373 |
| TCOX00000180.mm.1 | NCBI_Gene:668582:p | Ighv8-1 | immunoglobulin heavy variable 8-14              | 115808427 | 115808727 | TC1200002654.mm.1 | -0.3 | 0.286377 |
| TCOX00000181.mm.1 | ENSMUST00000116982 | Gm25508 | predicted gene, 25508                           | 74659031  | 74659119  | TC1700001162.mm.1 | 0.3  | 0.28662  |
| TCOX00000184.mm.1 | ENSMUST00000082494 | Gm22746 | predicted gene, 22746                           | 163150391 | 163150497 | TC0X00003318.mm.1 | -0.1 | 0.286829 |
| TCOX00000193.mm.1 | ENSMUST00000118977 | Gm12647 | predicted gene 12647                            | 94061373  | 94061637  | TC0400000941.mm.1 | -0.2 | 0.286988 |
| TCOX00000194.mm.1 | ENSMUST00000122189 | Gm5392  | predicted gene 5392                             | 107354879 | 107357447 | TC0X00002844.mm.1 | -0.1 | 0.287145 |
| TCOX00000195.mm.1 | ENSMUST00000158167 | Gm22539 | predicted gene, 22539                           | 51844685  | 51844801  | TC0X00000459.mm.1 | -0.1 | 0.287236 |
| TCOX00000202.mm.1 | ENSMUST00000117802 | Gm11367 | predicted gene 11367                            | 30112474  | 30112596  | TC1300000329.mm.1 | -0.1 | 0.287348 |
| TCOX00000203.mm.1 | ENSMUST00000177935 | Gm22584 | predicted gene, 22584                           | 59713534  | 59713625  | TC0700003284.mm.1 | 0.2  | 0.287356 |
| TCOX00000206.mm.1 | ENSMUST00000104304 | Gm23596 | predicted gene, 23596                           | 55161477  | 55161608  | TC1400002082.mm.1 | -0.1 | 0.287361 |
| TCOX00000207.mm.1 | ENSMUST00000175627 | Gm22800 | predicted gene, 22800                           | 118248689 | 118248782 | TC0200004407.mm.1 | 0.3  | 0.287394 |
| TCOX00000210.mm.1 | NM_026416          | S100a16 | S100 calcium binding protein A16                | 90537254  | 90543151  | TC0300000802.mm.1 | 0.1  | 0.287452 |
| TCOX00000212.mm.1 | ENSMUST00000117942 | Tcea1-p | transcription elongation factor A (SII) 1, pseu | 90882615  | 90883518  | TC1500000891.mm.1 | -0.2 | 0.287471 |
| TCOX00000216.mm.1 | ENSMUST00000120115 | Gm5678  | predicted gene 5678                             | 93628097  | 93630346  | TC1600001043.mm.1 | 0.1  | 0.287659 |
| TCOX00000219.mm.1 | NM_178616          | Psmd11  | proteasome (prosome, macropain) 26S subunit,    | 80428615  | 80473248  | TC1100001206.mm.1 | -0.2 | 0.287835 |
| TCOX00000223.mm.1 | ENSMUST00000138684 | Gm15839 | predicted gene 15839                            | 56886367  | 56889453  | TC1600000749.mm.1 | 0.1  | 0.288014 |
| TCOX00000224.mm.1 | NM_001033260       | Stox1   | storkhead box 1                                 | 62659043  | 62726128  | TC0200002266.mm.1 | 0.0  | 0.288047 |
| TCOX00000226.mm.1 | ENSMUST00000174652 | Gm20399 | predicted gene 20399                            | 5905019   | 5905156   | TC0700000063.mm.1 | -0.1 | 0.288071 |
| TCOX00000232.mm.1 | ENSMUST00000159115 | Gm16560 | predicted gene 16560                            | 94173080  | 94173483  | TC0300002434.mm.1 | -0.1 | 0.288092 |
| TCOX00000235.mm.1 | ENSMUST00000082891 | n-R5s19 | nuclear encoded rRNA 5S 19S                     | 39635964  | 39636082  | TC0300001894.mm.1 | -0.3 | 0.2881   |
| TCOX00000241.mm.1 | NM_028119          | Ddb2    | damage specific DNA binding protein 2           | 91211572  | 91237066  | TC0200004111.mm.1 | -0.1 | 0.288122 |
| TCOX00000250.mm.1 | ENSMUST00000071237 | Rpl21-p | ribosomal protein L21, pseudogene 10            | 38107440  | 38107922  | TC0300001883.mm.1 | -0.5 | 0.28822  |
| TCOX00000273.mm.1 | NM_023627          | Isyna1  | myo-inositol 1-phosphate synthase A1            | 70594481  | 70597290  | TC0800000756.mm.1 | -0.2 | 0.28832  |
| TCOX00000279.mm.1 | NM_023040          | Gfer    | growth factor, erv1 (S. cerevisiae)-like (augme | 24693190  | 24696156  | TC1700001637.mm.1 | 0.1  | 0.28857  |
| TCOX00000284.mm.1 | ENSMUST00000096101 | Gm5874  | predicted gene 5874                             | 18824552  | 18825058  | TC0600000149.mm.1 | -0.1 | 0.288582 |

|                   |                    |         |                                                 |           |           |                    |      |          |
|-------------------|--------------------|---------|-------------------------------------------------|-----------|-----------|--------------------|------|----------|
| TC0X00000288.mm.1 | ENSMUST00000158231 | Gm24727 | predicted gene, 24727                           | 33691801  | 33691944  | TC0800000395.mm.1  | -0.2 | 0.288667 |
| TC0X00000289.mm.1 | NCBI_Gene:16017:pr | Ighg1   | immunoglobulin heavy constant gamma 1 (G1m      | 113325246 | 113339382 | TC1200002540.mm.1  | -0.2 | 0.288794 |
| TC0X00000291.mm.1 | BC040084           | Ier5l   | immediate early response 5-like                 | 30471537  | 30474219  | TC02000003272.mm.1 | 0.1  | 0.288909 |
| TC0X00000313.mm.1 | NR_030154          | Mir471  | microRNA 471                                    | 66792595  | 66792661  | TC0X000002346.mm.1 | 0.1  | 0.289017 |
| TC0X00000316.mm.1 | NM_011258          | Rfc1    | replication factor C (activator 1) 1            | 65261852  | 65335670  | TC05000002483.mm.1 | -0.2 | 0.289066 |
| TC0X00000323.mm.1 | ENSMUST00000180078 | Gm23186 | predicted gene, 23186                           | 4678020   | 4678126   | TC1700000020.mm.1  | -0.2 | 0.289128 |
| TC0X00000324.mm.1 | NM_144548          | Il23r   | interleukin 23 receptor                         | 67422932  | 67491855  | TC06000002425.mm.1 | -0.1 | 0.289214 |
| TC0X00000326.mm.1 | ENSMUST00000157431 | Gm24262 | predicted gene, 24262                           | 35144636  | 35144779  | TC0900000329.mm.1  | -0.1 | 0.289301 |
| TC0X00000327.mm.1 | ENSMUST00000116676 | Gm23425 | predicted gene, 23425                           | 40851799  | 40851883  | TC1800000425.mm.1  | 0.3  | 0.289343 |
| TC0X00000329.mm.1 | ENSMUST00000161107 | Gm16298 | predicted gene 16298                            | 53767891  | 53768310  | TC1900001680.mm.1  | -0.3 | 0.289595 |
| TC0X00000354.mm.1 | NM_023248          | Sbds    | Shwachman-Bodian-Diamond syndrome homolo        | 130245731 | 130255530 | TC05000003318.mm.1 | 0.1  | 0.289711 |
| TC0X00000356.mm.1 | ENSMUST00000158939 | Gm24664 | predicted gene, 24664                           | 12980829  | 12980928  | TC1500000111.mm.1  | -0.1 | 0.289738 |
| TC0X00000361.mm.1 | NM_172943          | Alkhh5  | alkB, alkylation repair homolog 5 (E. coli)     | 60536381  | 60558512  | TC1100000756.mm.1  | 0.1  | 0.289956 |
| TC0X00000362.mm.1 | NM_001139504       | Dnlz    | DNL-type zinc finger                            | 26348118  | 26352110  | TC0200003186.mm.1  | 0.1  | 0.290107 |
| TC0X00000364.mm.1 | NM_145128          | Mgat5   | mannoside acetylglucosaminyltransferase 5       | 127204986 | 127483704 | TC0100001114.mm.1  | -0.2 | 0.290174 |
| TC0X00000381.mm.1 | ENSMUST00000178568 | Gm22910 | predicted gene, 22910                           | 53872017  | 53872148  | TC06000002307.mm.1 | 0.2  | 0.290267 |
| TC0X00000386.mm.1 | NM_001100449       | Taf4b   | TAF4B RNA polymerase II, TATA box binding pro   | 14783245  | 14900359  | TC1800000124.mm.1  | -0.1 | 0.2904   |
| TC0X00000404.mm.1 | ENSMUST00000183968 | AC16157 | N/A                                             | 54008473  | 54008580  | TC07000003092.mm.1 | 0.1  | 0.290464 |
| TC0X00000406.mm.1 | ENSMUST00000082948 | Gm24202 | predicted gene, 24202                           | 27761009  | 27761111  | TC0800001961.mm.1  | -0.3 | 0.290618 |
| TC0X00000407.mm.1 | ENSMUST00000158565 | Gm25771 | predicted gene, 25771                           | 122553173 | 122553316 | TC0100001103.mm.1  | -0.1 | 0.29063  |
| TC0X00000414.mm.1 | NM_008649          | Mup5    | major urinary protein 5                         | 61831319  | 61835233  | TC04000002771.mm.1 | -0.3 | 0.291049 |
| TC0X00000419.mm.1 | ENSMUST00000167906 | Gm17571 | predicted gene, 17571                           | 13444034  | 13446753  | TC09000001764.mm.1 | 0.3  | 0.291059 |
| TC0X00000420.mm.1 | NCBI_Gene:629845:p | Ighv6-3 | immunoglobulin heavy variable 6-3               | 114391712 | 114392169 | TC1200002595.mm.1  | -0.6 | 0.291077 |
| TC0X00000423.mm.1 | ENSMUST00000184380 | pRNA    | NoRC associated RNA, pRNA                       | 109599079 | 109599163 | TC0500001124.mm.1  | 0.1  | 0.291104 |
| TC0X00000428.mm.1 | ENSMUST00000065243 | Gm6180  | predicted pseudogene 6180                       | 42246911  | 42247411  | TC0800000498.mm.1  | -0.3 | 0.291155 |
| TC0X00000429.mm.1 | NM_001163996       | Zfp605  | zinc finger protein 605                         | 110110092 | 110132015 | TC05000001131.mm.1 | -0.1 | 0.291226 |
| TC0X00000436.mm.1 | ENSMUST00000083349 | Gm24454 | predicted gene, 24454                           | 79893584  | 79893715  | TC11000003333.mm.1 | -0.2 | 0.291266 |
| TC0X00000438.mm.1 | NM_001166590       | Eif5a   | eukaryotic translation initiation factor 5A     | 69916712  | 69921958  | TC1100003076.mm.1  | -0.1 | 0.291292 |
| TC0X00000439.mm.1 | NM_008320          | Irf8    | interferon regulatory factor 8                  | 120736358 | 120756694 | TC0800001451.mm.1  | -0.2 | 0.291387 |
| TC0X00000445.mm.1 | ENSMUST00000118494 | Gm5400  | predicted gene 5400                             | 94311894  | 94312836  | TC0X00000895.mm.1  | 0.1  | 0.291403 |
| TC0X00000451.mm.1 | NM_001174170       | Serpinb | serine (or cysteine) peptidase inhibitor, clade | 107511423 | 107525600 | TC0100003866.mm.1  | -0.1 | 0.291416 |
| TC0X00000459.mm.1 | NM_174989          | Ticam1  | toll-like receptor adaptor molecule 1           | 56269319  | 56276786  | TC17000002320.mm.1 | -0.1 | 0.291544 |
| TC0X00000469.mm.1 | NM_134066          | Akr1c18 | aldo-keto reductase family 1, member C18        | 4132615   | 4150654   | TC1300001377.mm.1  | -0.1 | 0.291608 |
| TC0X00000471.mm.1 | NM_178029          | Setd1a  | SET domain containing 1A                        | 127776670 | 127800122 | TC0700004629.mm.1  | -0.1 | 0.291621 |
| TC0X00000475.mm.1 | ENSMUST00000104649 | Gm26053 | predicted gene, 26053                           | 31573894  | 31573965  | TC1600001486.mm.1  | 0.2  | 0.291647 |
| TC0X00000479.mm.1 | NM_001081340       | Setd2   | SET domain containing 2                         | 110532597 | 110618633 | TC09000001463.mm.1 | -0.2 | 0.291742 |
| TC0X00000488.mm.1 | ENSMUST00000121478 | Gm14737 | predicted gene 14737                            | 82161187  | 82161360  | TC0X000002541.mm.1 | 0.4  | 0.291858 |
| TC0X00000503.mm.1 | ENSMUST00000157372 | Gm25056 | predicted gene, 25056                           | 151926348 | 151926409 | TC03000003137.mm.1 | 0.1  | 0.291914 |
| TC0X00000510.mm.1 | ENSMUST00000121753 | Gm7180  | predicted pseudogene 7180                       | 81222362  | 81222874  | TC0700003606.mm.1  | 0.2  | 0.29201  |
| TC0X00000513.mm.1 | NM_001256073       | Scgb1b3 | secretoglobulin, family 1B, member 3            | 31375592  | 31376916  | TC07000000591.mm.1 | 0.1  | 0.29206  |
| TC0X00000515.mm.1 | ENSMUST00000157939 | Gm23782 | predicted gene, 23782                           | 137987657 | 137987776 | TC01000003166.mm.1 | -0.1 | 0.292231 |
| TC0X00000518.mm.1 | ENSMUST00000122032 | Gm7150  | predicted gene 7150                             | 153403090 | 153404070 | TC0X000003206.mm.1 | -0.1 | 0.292266 |
| TC0X00000522.mm.1 | ENSMUST00000177528 | Gm20620 | predicted gene 20620                            | 58695844  | 58696011  | TC09000002398.mm.1 | -0.4 | 0.292312 |
| TC0X00000524.mm.1 | NM_025772          | Dtnbp1  | dystrobrevin binding protein 1                  | 44922079  | 45002096  | TC1300001902.mm.1  | 0.1  | 0.292628 |
| TC0X00000530.mm.1 | ENSMUST00000179389 | Gm25449 | predicted gene, 25449                           | 59419323  | 59419401  | TC07000003167.mm.1 | -0.1 | 0.29271  |
| TC0X00000535.mm.1 | ENSMUST00000104042 | Gm25097 | predicted gene, 25097                           | 145160477 | 145160621 | TC0X000001434.mm.1 | -0.2 | 0.292786 |
| TC0X00000537.mm.1 | ENSMUST00000183769 | AC16633 | N/A                                             | 79045608  | 79045701  | TC0100000685.mm.1  | 0.2  | 0.292842 |
| TC0X00000540.mm.1 | ENSMUST00000184804 | SNORA7  | Small nucleolar RNA SNORA7                      | 121040344 | 121040480 | TC0700004205.mm.1  | -0.2 | 0.292988 |
| TC0X00000542.mm.1 | ENSMUST00000179336 | LOC1010 | uncharacterized LOC101055632                    | 59396324  | 59424653  | TC0Y00000162.mm.1  | -0.1 | 0.293305 |
| TC0X00000544.mm.1 | NM_025686          | Brf2    | BRF2, subunit of RNA polymerase III transcripti | 27123830  | 27128632  | TC08000001951.mm.1 | -0.1 | 0.293361 |
| TC0X00000550.mm.1 | NM_030259          | Rilpl2  | Rab interacting lysosomal protein-like 2        | 124463265 | 124478366 | TC05000003256.mm.1 | -0.1 | 0.293472 |
| TC0X00000563.mm.1 | NM_029971          | Pmch    | pro-melanin-concentrating hormone               | 88091072  | 88092375  | TC1000001072.mm.1  | -0.1 | 0.293507 |
| TC0X00000568.mm.1 | ENSMUST00000116697 | Gm24587 | predicted gene, 24587                           | 96855582  | 96855670  | TC1000002745.mm.1  | 0.1  | 0.293597 |
| TC0X00000570.mm.1 | ENSMUST00000083395 | Gm22054 | predicted gene, 22054                           | 23836167  | 23836321  | TC05000002064.mm.1 | 0.2  | 0.293789 |
| TC0X00000580.mm.1 | ENSMUST00000119237 | Gm13668 | predicted gene 13668                            | 73959669  | 73960669  | TC02000003767.mm.1 | -0.1 | 0.293911 |
| TC0X00000589.mm.1 | ENSMUST00000158557 | Gm22945 | predicted gene, 22945                           | 104471051 | 104471207 | TC10000002789.mm.1 | 0.1  | 0.293937 |
| TC0X00000597.mm.1 | ENSMUST00000121539 | Gm12430 | predicted gene 12430                            | 47453632  | 47454953  | TC0400000522.mm.1  | -0.1 | 0.293991 |
| TC0X00000606.mm.1 | NM_001111312       | Lrrfip1 | leucine rich repeat (in FLII) interacting prote | 90998727  | 91128944  | TC0100000884.mm.1  | -0.1 | 0.294171 |
| TC0X00000611.mm.1 | XM_619973          | Gm5858  | predicted gene 5858                             | 153693901 | 153694365 | TC03000003165.mm.1 | -0.2 | 0.294282 |
| TC0X00000616.mm.1 | ENSMUST00000157844 | Gm24751 | predicted gene, 24751                           | 41949997  | 41949098  | TC1500000339.mm.1  | 0.1  | 0.294348 |
| TC0X00000617.mm.1 | NR_034155          | Olfr137 | olfactory receptor 1372, pseudogene 1           | 52154876  | 52157907  | TC11000002713.mm.1 | -0.1 | 0.294404 |
| TC0X00000627.mm.1 | NM_001199246       | Maged2  | melanoma antigen, family D, 2                   | 150806370 | 150814345 | TC0X000003168.mm.1 | 0.1  | 0.294546 |
| TC0X00000633.mm.1 | ENSMUST00000184252 | Gm11214 | predicted gene 11214                            | 63662359  | 63663379  | TC04000002807.mm.1 | -0.1 | 0.294772 |
| TC0X00000635.mm.1 | NM_007536          | Bcl2a1d | B cell leukemia/lymphoma 2 related protein A1c  | 88723287  | 88731850  | TC09000002806.mm.1 | -0.1 | 0.294821 |
| TC0X00000643.mm.1 | ENSMUST00000104261 | Gm23127 | predicted gene, 23127                           | 75768068  | 75768197  | TC1300000916.mm.1  | -0.2 | 0.294846 |
| TC0X00000645.mm.1 | NM_029091          | Klc4    | kinesin light chain 4                           | 46630624  | 46646022  | TC17000002183.mm.1 | 0.0  | 0.294981 |
| TC0X00000648.mm.1 | NM_009471          | Umps    | uridine monophosphate synthetase                | 33954782  | 33967038  | TC1600001527.mm.1  | -0.1 | 0.295129 |
| TC0X00000652.mm.1 | ENSMUST00000104317 | Gm24233 | predicted gene, 24233                           | 59134072  | 59134193  | TC1200000504.mm.1  | -0.6 | 0.295453 |
| TC0X00000653.mm.1 | NM_198304          | Nup188  | nucleoporin 188                                 | 30286397  | 30344266  | TC02000005468.mm.1 | -0.1 | 0.295488 |
| TC0X00000655.mm.1 | NM_001033449       | Tmem237 | transmembrane protein 237                       | 59100593  | 59120382  | TC01000002395.mm.1 | 0.1  | 0.295536 |
| TC0X00000670.mm.1 | NM_173781          | Rab6b   | RAB6B, member RAS oncogene family               | 103112074 | 103185270 | TC0900001299.mm.1  | -0.1 | 0.295539 |
| TC0X00000671.mm.1 | NM_001277202       | Clec2f  | C-type lectin domain family 2, member f         | 129014112 | 129020527 | TC0600001525.mm.1  | -0.1 | 0.295561 |
| TC0X00000691.mm.1 | ENSMUST00000083038 | Gm26055 | predicted gene, 26055                           | 95378845  | 95378951  | TC12000002167.mm.1 | -0.1 | 0.295565 |
| TC0X00000697.mm.1 | ENSMUST00000082700 | Gm22620 | predicted gene, 22620                           | 15315189  | 15315321  | TC0900000118.mm.1  | -0.7 | 0.295878 |
| TC0X00000699.mm.1 | NM_013463          | Gla     | galactosidase, alpha                            | 134588149 | 134601125 | TC0X000002995.mm.1 | 0.1  | 0.296159 |
| TC0X00000704.mm.1 | ENSMUST00000116474 | Gm13343 | predicted gene 13343                            | 19652244  | 19652348  | TC02000003067.mm.1 | -0.1 | 0.296309 |
| TC0X00000708.mm.1 | ENSMUST00000074761 | Gm10134 | predicted gene 10134                            | 28506095  | 28506475  | TC0200000485.mm.1  | 0.2  | 0.296406 |
| TC0X00000709.mm.1 | ENSMUST00000178683 | Gm26177 | predicted gene, 26177                           | 54311225  | 54311331  | TC10000002181.mm.1 | -0.3 | 0.296443 |

|                   |                    |         |                                                 |           |           |                   |      |          |
|-------------------|--------------------|---------|-------------------------------------------------|-----------|-----------|-------------------|------|----------|
| TC0X00000718.mm.1 | ENSMUST00000083857 | Gm25516 | predicted gene, 25516                           | 147874772 | 147874878 | TC0200004798.mm.1 | -0.5 | 0.296471 |
| TC0X00000719.mm.1 | ENSMUST00000081004 | Gm6644  | predicted gene 6644                             | 55443733  | 55445064  | TC0100002359.mm.1 | 0.3  | 0.296595 |
| TC0X00000724.mm.1 | NM_028611          | Ndufaf7 | NADH dehydrogenase (ubiquinone) 1 alpha subc    | 78937135  | 78948052  | TC1700001192.mm.1 | 0.1  | 0.296741 |
| TC0X00000727.mm.1 | NM_025399          | Nudt14  | nudix (nucleoside diphosphate linked moiety X)- | 112934733 | 112942118 | TC1200002445.mm.1 | -0.1 | 0.296788 |
| TC0X00000732.mm.1 | ENSMUST00000175092 | Gm24823 | predicted gene, 24823                           | 144618143 | 144618233 | TC0200004765.mm.1 | 0.1  | 0.296795 |
| TC0X00000736.mm.1 | NM_033607          | Uchl4   | ubiquitin carboxyl-terminal esterase L4         | 64235201  | 64236362  | TC0900000818.mm.1 | -0.1 | 0.296802 |
| TC0X00000738.mm.1 | XR_106057          | Gm20264 | predicted gene, 20264                           | 152919862 | 152921060 | TC0X00003202.mm.1 | -0.1 | 0.296802 |
| TC0X00000739.mm.1 | ENSMUST00000083750 | Gm23733 | predicted gene, 23733                           | 120317884 | 120317989 | TC0300002832.mm.1 | -0.3 | 0.296828 |
| TC0X00000740.mm.1 | XR_105655          | Gm3601  | predicted gene 3601                             | 49971363  | 49989708  | TC1400001972.mm.1 | -0.4 | 0.297011 |
| TC0X00000745.mm.1 | ENSMUST00000177427 | Gm22395 | predicted gene, 22395                           | 64107407  | 64107502  | TC0500002464.mm.1 | -0.2 | 0.297078 |
| TC0X00000750.mm.1 | NM_145934          | Stap2   | signal transducing adaptor family member 2      | 55997076  | 56005606  | TC1700002308.mm.1 | 0.0  | 0.297183 |
| TC0X00000752.mm.1 | ENSMUST00000183875 | FTX_3   | FTX transcript, XIST regulator conserved region | 103606323 | 103606449 | TC0X00001037.mm.1 | 0.1  | 0.297235 |
| TC0X00000765.mm.1 | NM_138595          | Gldc    | glycine decarboxylase                           | 30098441  | 30175441  | TC1900001355.mm.1 | 0.3  | 0.297265 |
| TC0X00000772.mm.1 | ENSMUST00000158097 | Gm22211 | predicted gene, 22211                           | 52075424  | 52075579  | TC0700003089.mm.1 | -0.1 | 0.297593 |
| TC0X00000776.mm.1 | ENSMUST00000181964 | Gm11385 | predicted gene 11385                            | 33217268  | 33218151  | TC1300001770.mm.1 | -0.1 | 0.297647 |
| TC0X00000784.mm.1 | ENSMUST00000104456 | Gm24982 | predicted gene, 24982                           | 114832383 | 114832514 | TC0700004144.mm.1 | 0.2  | 0.297678 |
| TC0X00000793.mm.1 | NM_145944          | Ccdc25  | coiled-coil domain containing 25                | 65837302  | 65866604  | TC1400000941.mm.1 | -0.1 | 0.297681 |
| TC0X00000796.mm.1 | ENSMUST00000104471 | Gm23323 | predicted gene, 23323                           | 123162371 | 123162503 | TC0900001659.mm.1 | 0.2  | 0.297809 |
| TC0X00000798.mm.1 | NCBI_Gene:10012436 | Traj25  | T cell receptor alpha joining 25                | 54194815  | 54194871  | TC1400000735.mm.1 | -0.1 | 0.297963 |
| TC0X00000804.mm.1 | NM_019545          | Hao2    | hydroxyacid oxidase 2                           | 98874519  | 98893239  | TC0300002566.mm.1 | 0.6  | 0.297981 |
| TC0X00000812.mm.1 | NM_027554          | Usp38   | ubiquitin specific peptidase 38                 | 80980733  | 81014906  | TC0800002535.mm.1 | -0.2 | 0.29818  |
| TC0X00000814.mm.1 | NM_023137          | Ubd     | ubiquitin D                                     | 37193892  | 37196101  | TC1700000761.mm.1 | -0.2 | 0.298205 |
| TC0X00000819.mm.1 | NM_026064          | Myl12a  | myosin, light chain 12A, regulatory, non-sarcom | 70993656  | 71002878  | TC1700002488.mm.1 | 0.1  | 0.298914 |
| TC0X00000845.mm.1 | NM_007793          | Cstb    | cystatin B                                      | 78425670  | 78427622  | TC1000000784.mm.1 | -0.3 | 0.29932  |
| TC0X00000849.mm.1 | NM_030260          | Zxdc    | ZXD family zinc finger C                        | 90369492  | 90403490  | TC0600001072.mm.1 | -0.1 | 0.299399 |
| TC0X00000854.mm.1 | NM_009698          | Aprt    | adenine phosphoribosyl transferase              | 122574636 | 122576907 | TC0800003076.mm.1 | -0.1 | 0.299442 |
| TC0X00000856.mm.1 | ENSMUST00000116790 | Gm25848 | predicted gene, 25848                           | 32243712  | 32243855  | TC1600001504.mm.1 | -0.4 | 0.299586 |
| TC0X00000864.mm.1 | NM_010749          | M6pr    | mannose-6-phosphate receptor, cation depende    | 122308720 | 122317680 | TC0600001380.mm.1 | 0.2  | 0.299769 |
| TC0X00000873.mm.1 | XR_140545          | Gm4631  | predicted gene 4631                             | 175192005 | 175338212 | TC0200005335.mm.1 | 0.3  | 0.300019 |
| TC0X00000876.mm.1 | ENSMUST00000103988 | Gm25759 | predicted gene, 25759                           | 124146281 | 124146409 | TC0700001777.mm.1 | -0.1 | 0.300049 |
| TC0X00000878.mm.1 | NM_053214          | Myo1f   | myosin IF                                       | 33555707  | 33607764  | TC1700000585.mm.1 | 0.1  | 0.30022  |
| TC0X00000880.mm.1 | ENSMUST00000083324 | Gm23969 | predicted gene, 23969                           | 26911261  | 26911334  | TC0200000458.mm.1 | -0.7 | 0.300294 |
| TC0X00000892.mm.1 | NM_145510          | Rabif   | RAB interacting factor                          | 134494660 | 134507889 | TC0100001231.mm.1 | -0.1 | 0.300315 |
| TC0X00000895.mm.1 | ENSMUST00000169555 | Gm3755  | predicted gene 3755                             | 7440924   | 7450917   | TC1400001427.mm.1 | 0.1  | 0.300378 |
| TC0X00000902.mm.1 | NM_138685          | Wfdc15b | WAP four-disulfide core domain 15B              | 164214454 | 164221663 | TC0200005108.mm.1 | 0.5  | 0.300499 |
| TC0X00000916.mm.1 | ENSMUST00000157435 | Gm24475 | predicted gene, 24475                           | 74000860  | 74001002  | TC1700001155.mm.1 | -0.1 | 0.300512 |
| TC0X00000917.mm.1 | NM_021387          | Vstm2b  | V-set and transmembrane domain containing 2B    | 40899278  | 40929968  | TC0700000720.mm.1 | 0.1  | 0.300514 |
| TC0X00000919.mm.1 | ENSMUST00000073933 | Olfr328 | olfactory receptor 328                          | 58551305  | 58554642  | TC1100002826.mm.1 | -0.1 | 0.3006   |
| TC0X00000920.mm.1 | NM_172407          | Cdkn2ai | CDKN2A interacting protein                      | 47709344  | 47713931  | TC0800002180.mm.1 | -0.1 | 0.300695 |
| TC0X00000925.mm.1 | NCBI_Gene:780929:p | Ighv1-5 | immunoglobulin heavy variable 1-50              | 115119748 | 115120180 | TC1200002628.mm.1 | -0.8 | 0.300702 |
| TC0X00000934.mm.1 | XM_001477721       | Gm9736  | predicted gene 9736                             | 77750521  | 77751354  | TC000002426.mm.1  | -0.1 | 0.300773 |
| TC0X00000947.mm.1 | NCBI_Gene:545851:p | Igkv12- | immunoglobulin kappa variable 12-44             | 69814631  | 69858922  | TC0600003579.mm.1 | -0.4 | 0.30078  |
| TC0X00000951.mm.1 | NM_001081473       | Zxdb    | zinc finger, X-linked, duplicated B             | 94724569  | 94730191  | TC0X00000902.mm.1 | -0.1 | 0.300819 |
| TC0X00000955.mm.1 | ENSMUST00000060066 | 4930555 | RIKEN cDNA 4930555K19 gene                      | 41173701  | 41173871  | TC1500000329.mm.1 | -0.1 | 0.300829 |
| TC0X00000964.mm.1 | ENSMUST00000121735 | Oaz2-ps | ornithine decarboxylase antizyme 2, pseudogene  | 135525964 | 135526532 | TC0300002993.mm.1 | -0.2 | 0.301002 |
| TC0X00000965.mm.1 | NM_175560          | Zfp747  | zinc finger protein 747                         | 127372537 | 127376050 | TC0700004324.mm.1 | -0.1 | 0.301034 |
| TC0X00000967.mm.1 | NM_009690          | Cd5l    | CD5 antigen-like                                | 87357881  | 87371074  | TC0300000693.mm.1 | -0.1 | 0.301144 |
| TC0X00000969.mm.1 | XR_105914          | BC02310 | cDNA sequence BC023105                          | 60439295  | 60443852  | TC1800000612.mm.1 | 0.1  | 0.301222 |
| TC0X00000978.mm.1 | NM_001037907       | Ripply2 | rippyly2 homolog (zebrafish)                    | 87015537  | 87019916  | TC0900001122.mm.1 | -0.1 | 0.301403 |
| TC0X00000987.mm.1 | ENSMUST00000119458 | Gm5943  | predicted pseudogene 5943                       | 114989150 | 114989608 | TC0X00001150.mm.1 | -0.3 | 0.301869 |
| TC0X00000990.mm.1 | ENSMUST00000082831 | Gm26456 | predicted gene, 26456                           | 155092018 | 155092128 | TC0300001558.mm.1 | 0.2  | 0.302115 |
| TC0X00000991.mm.1 | ENSMUST00000175317 | Gm24810 | predicted gene, 24810                           | 62652935  | 62653004  | TC1500001613.mm.1 | 0.1  | 0.302473 |
| TC0X00001005.mm.1 | NM_028808          | P2ry13  | purinergic receptor P2Y, G-protein coupled 13   | 59207892  | 59210882  | TC0300002053.mm.1 | -0.2 | 0.302508 |
| TC0X00001034.mm.1 | NM_001204241       | Clec4a3 | C-type lectin domain family 4, member a3        | 122952515 | 122969878 | TC0600001398.mm.1 | 0.2  | 0.302819 |
| TC0X00001035.mm.1 | ENSMUST00000117165 | Cbfa2t2 | core-binding factor, runt domain, alpha subunit | 60231482  | 60232198  | TC0500000579.mm.1 | -0.1 | 0.30282  |
| TC0X00001037.mm.1 | ENSMUST00000083198 | Gm24456 | predicted gene, 24456                           | 123743297 | 123743403 | TC0300002882.mm.1 | -0.6 | 0.302848 |
| TC0X00001047.mm.1 | ENSMUST00000117964 | Gm13722 | predicted gene 13722                            | 86090336  | 86093401  | TC0200003913.mm.1 | -0.1 | 0.30292  |
| TC0X00001049.mm.1 | ENSMUST00000184813 | RP24-19 | N/A                                             | 15086769  | 15087026  | TC0700002399.mm.1 | -0.2 | 0.302929 |
| TC0X00001052.mm.1 | ENSMUST00000116907 | Gm24397 | predicted gene, 24397                           | 126468135 | 126468224 | TC0100003006.mm.1 | 0.2  | 0.302997 |
| TC0X00001057.mm.1 | ENSMUST00000116752 | Gm23652 | predicted gene, 23652                           | 78246205  | 78246311  | TC1400002468.mm.1 | 0.2  | 0.303026 |
| TC0X00001058.mm.1 | NR_028479          | Snora20 | small nucleolar RNA, H/ACA box 20               | 12922790  | 12922917  | TC1700000144.mm.1 | -0.4 | 0.303042 |
| TC0X00001059.mm.1 | NM_177325          | Tsr1    | TSR1 20S rRNA accumulation                      | 74898071  | 74909342  | TC1100001051.mm.1 | -0.1 | 0.303115 |
| TC0X00001064.mm.1 | NM_001081099       | Clhc1   | clathrin heavy chain linker domain containing 1 | 134510999 | 134523927 | TC0400001642.mm.1 | -0.1 | 0.303119 |
| TC0X00001069.mm.1 | NM_146466          | Olfr165 | olfactory receptor 165                          | 19407039  | 19408078  | TC1600001328.mm.1 | 0.1  | 0.30334  |
| TC0X00001071.mm.1 | NM_001277230       | Zbtb24  | zinc finger and BTB domain containing 24        | 41450358  | 41465582  | TC1000000364.mm.1 | -0.1 | 0.303556 |
| TC0X00001074.mm.1 | NM_009682          | Ap3s2   | adaptor-related protein complex 3, sigma 2 subu | 79875325  | 79920640  | TC0700003572.mm.1 | 0.1  | 0.30356  |
| TC0X00001078.mm.1 | ENSMUST00000082848 | Gm22685 | predicted gene, 22685                           | 49289298  | 49289403  | TC0400000544.mm.1 | -0.5 | 0.30358  |
| TC0X00001083.mm.1 | ENSMUST00000104216 | Gm25420 | predicted gene, 25420                           | 80707589  | 80707715  | TC0200001180.mm.1 | 0.1  | 0.303601 |
| TC0X00001084.mm.1 | NM_009851          | Cd44    | CD44 antigen                                    | 102811141 | 102901665 | TC0200004219.mm.1 | 0.1  | 0.303804 |
| TC0X00001089.mm.1 | NM_011950          | Mapk13  | mitogen-activated protein kinase 13             | 28769307  | 28778704  | TC1700000487.mm.1 | 0.0  | 0.303811 |
| TC0X00001098.mm.1 | ENSMUST00000082682 | Gm26454 | predicted gene, 26454                           | 49009883  | 49009989  | TC1200000406.mm.1 | -0.2 | 0.303924 |
| TC0X00001106.mm.1 | NM_146229          | Dync1li | dynein cytoplasmic 1 light intermediate chain 1 | 114688790 | 114724302 | TC0900001517.mm.1 | -0.1 | 0.304072 |
| TC0X00001121.mm.1 | ENSMUST00000157300 | Gm23232 | predicted gene, 23232                           | 114602088 | 114602192 | TC0900003173.mm.1 | -0.1 | 0.304317 |
| TC0X00001131.mm.1 | NM_207207          | Mrps26  | mitochondrial ribosomal protein S26             | 130563742 | 130568695 | TC0200001990.mm.1 | -0.1 | 0.304374 |
| TC0X00001133.mm.1 | NM_001254725       | Lce3e   | late cornified envelope 3E                      | 92967061  | 92968281  | TC0300000837.mm.1 | -0.1 | 0.304409 |
| TC0X00001150.mm.1 | NM_008510          | Xcl1    | chemokine (C motif) ligand 1                    | 164931644 | 164935527 | TC0100003432.mm.1 | -0.1 | 0.304572 |
| TC0X00001155.mm.1 | NM_013709          | Sh3yl1  | Sh3 domain YSC-like 1                           | 30911668  | 30960162  | TC1200000258.mm.1 | 0.0  | 0.304586 |
| TC0X00001157.mm.1 | ENSMUST00000082800 | Gm23445 | predicted gene, 23445                           | 126915720 | 126915826 | TC0700004305.mm.1 | -0.4 | 0.30464  |

|                   |                    |         |                                                 |           |           |                    |      |          |
|-------------------|--------------------|---------|-------------------------------------------------|-----------|-----------|--------------------|------|----------|
| TC0X00001160.mm.1 | NM_021704          | Cxcl12  | chemokine (C-X-C motif) ligand 12               | 117168535 | 117181368 | TC0600001313.mm.1  | -0.1 | 0.304897 |
| TC0X00001161.mm.1 | ENSMUST00000115764 | Dynl11- | dynein light chain Tctex-type 1, pseudogene 1   | 135349088 | 135349780 | TC0600003319.mm.1  | -0.2 | 0.304917 |
| TC0X00001168.mm.1 | NM_009196          | Slc16a1 | solute carrier family 16 (monocarboxylic acid t | 104638664 | 104658462 | TC0300001076.mm.1  | -0.3 | 0.304986 |
| TC0X00001170.mm.1 | ENSMUST00000118512 | Gm14700 | predicted gene 14700                            | 68992932  | 68993378  | TC0X00000617.mm.1  | 0.2  | 0.305028 |
| TC0X00001174.mm.1 | ENSMUST00000119008 | Gm7645  | predicted gene 7645                             | 181292148 | 181292935 | TC0200002819.mm.1  | -0.1 | 0.305076 |
| TC0X00001175.mm.1 | NM_010120          | Elf1a   | eukaryotic translation initiation factor 1A     | 46597704  | 46610225  | TC1800000480.mm.1  | 0.1  | 0.305269 |
| TC0X00001176.mm.1 | ENSMUST00000170447 | Rpl28-p | ribosomal protein L28, pseudogene 4             | 117213656 | 117214048 | TC0600002983.mm.1  | -0.1 | 0.305285 |
| TC0X00001177.mm.1 | NM_080461          | Zfp358  | zinc finger protein 358                         | 3493138   | 3497210   | TC0800000009.mm.1  | 0.1  | 0.30529  |
| TC0X00001185.mm.1 | ENSMUST00000157465 | Gm23668 | predicted gene, 23668                           | 60042069  | 60042179  | TC0900002429.mm.1  | 0.1  | 0.305368 |
| TC0X00001186.mm.1 | ENSMUST00000104442 | Gm22149 | predicted gene, 22149                           | 82772321  | 82772456  | TC1200002036.mm.1  | 0.2  | 0.305604 |
| TC0X00001189.mm.1 | NM_007451          | Slc25a5 | solute carrier family 25 (mitochondrial carrier | 36795651  | 36798807  | TC0X00000327.mm.1  | -0.2 | 0.305736 |
| TC0X00001192.mm.1 | ENSMUST00000104571 | Gm23528 | predicted gene, 23528                           | 160645573 | 160645704 | TC0100001455.mm.1  | 0.2  | 0.306273 |
| TC0X00001193.mm.1 | ENSMUST00000132554 | Gm5924  | predicted gene 5924                             | 5338792   | 5340451   | TC0X00000036.mm.1  | -0.1 | 0.306498 |
| TC0X00001196.mm.1 | ENSMUST00000085450 | Klk1b3  | kallikrein 1-related peptidase b3               | 44198191  | 44202351  | TC0700000793.mm.1  | 0.1  | 0.306589 |
| TC0X00001201.mm.1 | ENSMUST00000184242 | AL67207 | N/A                                             | 24617213  | 24617318  | TC0X00001967.mm.1  | 0.5  | 0.306609 |
| TC0X00001208.mm.1 | ENSMUST00000116912 | Gm26043 | predicted gene, 26043                           | 27363314  | 27363401  | TC0700000457.mm.1  | 0.2  | 0.306755 |
| TC0X00001251.mm.1 | ENSMUST00000083772 | Gm22830 | predicted gene, 22830                           | 85772351  | 85772480  | TC0900002773.mm.1  | -0.2 | 0.306786 |
| TC0X00001262.mm.1 | ENSMUST00000107486 | Gm10974 | predicted gene 10974                            | 66365905  | 66386309  | TC0700000995.mm.1  | 0.3  | 0.306792 |
| TC0X00001275.mm.1 | NM_172606          | 6-Mar   | membrane-associated ring finger (C3HC4) 6       | 31455899  | 31531037  | TC1500001323.mm.1  | 0.1  | 0.306819 |
| TC0X00001283.mm.1 | ENSMUST00000120961 | Gm12026 | predicted gene 12026                            | 19383685  | 19384708  | TC1100000182.mm.1  | -0.1 | 0.306871 |
| TC0X00001288.mm.1 | NM_001256263       | 3110082 | RIKEN cDNA 3110082J24 gene                      | 30103584  | 30106086  | TC0500002153.mm.1  | 0.1  | 0.306884 |
| TC0X00001292.mm.1 | NM_029878          | Tbcd    | tubulin-specific chaperone 6                    | 121451949 | 121617170 | TC1100002066.mm.1  | 0.1  | 0.306896 |
| TC0X00001305.mm.1 | ENSMUST00000117931 | Gm12365 | predicted gene 12365                            | 35436214  | 35436781  | TC0400000320.mm.1  | -0.1 | 0.306995 |
| TC0X00001316.mm.1 | NM_010709          | Elf2d   | eukaryotic translation initiation factor 2D     | 131153181 | 131187658 | TC0100001168.mm.1  | -0.1 | 0.307053 |
| TC0X00001317.mm.1 | ENSMUST00000175293 | Gm23633 | predicted gene, 23633                           | 27380732  | 27380850  | TC1400001630.mm.1  | 0.2  | 0.307071 |
| TC0X00001319.mm.1 | ENSMUST00000178758 | Gm25944 | predicted gene, 25944                           | 59731223  | 59731316  | TC0700003291.mm.1  | 0.2  | 0.307257 |
| TC0X00001322.mm.1 | ENSMUST00000104086 | Gm22786 | predicted gene, 22786                           | 86087301  | 86087422  | TC0100000780.mm.1  | -0.4 | 0.307292 |
| TC0X00001323.mm.1 | NM_019521          | Gas6    | growth arrest specific 6                        | 13465374  | 13494535  | TC0800001737.mm.1  | 0.2  | 0.307411 |
| TC0X00001324.mm.1 | ENSMUST00000179259 | Gm23714 | predicted gene, 23714                           | 15695213  | 15695317  | TC0700000210.mm.1  | -0.6 | 0.307478 |
| TC0X00001326.mm.1 | NM_170777          | Elof1   | elongation factor 1 homolog (ELF1, S. cerevisia | 22112989  | 22117169  | TC0900001899.mm.1  | -0.1 | 0.307486 |
| TC0X00001335.mm.1 | NM_010660          | Krt10   | keratin 10                                      | 99385254  | 99389364  | TC1100003706.mm.1  | -0.1 | 0.307622 |
| TC0X00001347.mm.1 | NM_080852          | Slc7a12 | solute carrier family 7 (cationic amino acid tr | 14480697  | 14505830  | TC0300000089.mm.1  | 0.6  | 0.307721 |
| TC0X00001348.mm.1 | ENSMUST00000184785 | AC14164 | N/A                                             | 33592607  | 33592713  | TC1900001409.mm.1  | 0.4  | 0.30776  |
| TC0X00001349.mm.1 | NM_177214          | Snrnp20 | small nuclear ribonucleoprotein 200 (U5)        | 127208386 | 127240451 | TC0200001909.mm.1  | -0.1 | 0.307843 |
| TC0X00001354.mm.1 | ENSMUST00000154752 | Gm15275 | predicted gene 15275                            | 33282100  | 33282446  | TC0X00000288.mm.1  | 0.1  | 0.308096 |
| TC0X00001369.mm.1 | ENSMUST00000082473 | Gm23926 | predicted gene, 23926                           | 86311289  | 86311378  | TC1400002514.mm.1  | -0.3 | 0.308193 |
| TC0X00001371.mm.1 | ENSMUST00000118620 | Gm14654 | predicted gene 14654                            | 46361460  | 46361906  | TC0X00000419.mm.1  | 0.3  | 0.30851  |
| TC0X00001383.mm.1 | ENSMUST00000158936 | Gm24669 | predicted gene, 24669                           | 46272051  | 46272147  | TC0800000534.mm.1  | -0.2 | 0.308591 |
| TC0X00001385.mm.1 | NM_053215          | Ugt2b37 | UDP glucuronosyltransferase 2 family, polypepti | 87240492  | 87254804  | TC0500002694.mm.1  | 0.1  | 0.308789 |
| TC0X00001388.mm.1 | NM_207021          | Tas2r11 | taste receptor, type 2, member 117              | 132802818 | 132803975 | TC0600001563.mm.1  | 0.1  | 0.30883  |
| TC0X00001398.mm.1 | ENSMUST00000081471 | Gm10139 | predicted gene 10139                            | 65512848  | 65512848  | TC1300000795.mm.1  | -0.2 | 0.308949 |
| TC0X00001400.mm.1 | BC049102           | Exoc2   | exocyst complex component 2                     | 30813918  | 30974047  | TC1300001737.mm.1  | -0.2 | 0.308955 |
| TC0X00001403.mm.1 | NM_027840          | Snx20   | sorting nexin 20                                | 88626827  | 88636128  | TC0800002658.mm.1  | -0.2 | 0.309129 |
| TC0X00001412.mm.1 | ENSMUST00000083831 | Gm23851 | predicted gene, 23851                           | 124964285 | 124964387 | TC0600001437.mm.1  | 0.1  | 0.309129 |
| TC0X00001420.mm.1 | ENSMUST00000083939 | n-R5s18 | nuclear encoded rRNA 5S 183                     | 41303158  | 41303272  | TC0400000365.mm.1  | 0.0  | 0.309217 |
| TC0X00001429.mm.1 | ENSMUST00000082992 | Gm22044 | predicted gene, 22044                           | 79014364  | 79014470  | TC11000002514.mm.1 | -0.5 | 0.309452 |
| TC0X00001433.mm.1 | ENSMUST00000167282 | Gm10039 | predicted pseudogene 10039                      | 100361618 | 100362151 | TC1100003768.mm.1  | -0.3 | 0.309544 |
| TC0X00001434.mm.1 | NM_146578          | Olfr103 | olfactory receptor 1033                         | 86020640  | 86044808  | TC0200001264.mm.1  | 0.1  | 0.309649 |
| TC0X00001437.mm.1 | ENSMUST00000082757 | Gm24149 | predicted gene, 24149                           | 109066984 | 109067090 | TC1100003982.mm.1  | -0.5 | 0.309701 |
| TC0X00001441.mm.1 | ENSMUST00000184529 | AC12432 | N/A                                             | 93072755  | 93072822  | TC1600001035.mm.1  | -0.2 | 0.309887 |
| TC0X00001446.mm.1 | ENSMUST00000117937 | Gm12282 | predicted gene 12282                            | 62750064  | 62751280  | TC1100002947.mm.1  | -0.1 | 0.309949 |
| TC0X00001461.mm.1 | ENSMUST00000163316 | LOC1010 | 39S ribosomal protein L41, mitochondrial-like   | 25882012  | 25882407  | TC0700002648.mm.1  | -0.2 | 0.309986 |
| TC0X00001511.mm.1 | ENSMUST00000157709 | Gm22842 | predicted gene, 22842                           | 180837838 | 180837955 | TC0200002805.mm.1  | 0.1  | 0.310065 |
| TC0X00001515.mm.1 | ENSMUST00000119871 | Gm12733 | predicted gene 12733                            | 77644144  | 77644910  | TC1100003271.mm.1  | -0.1 | 0.310149 |
| TC0X00001520.mm.1 | ENSMUST00000118045 | Gm15896 | predicted gene 15896                            | 82202648  | 82203398  | TC0900001078.mm.1  | -0.1 | 0.310157 |
| TC0X00001523.mm.1 | ENSMUST00000184613 | RP24-84 | N/A                                             | 15288251  | 15289190  | TC0700002401.mm.1  | 0.3  | 0.310661 |
| TC0X00001524.mm.1 | XM_003688794       | Gm21404 | predicted gene, 21404                           | 121907890 | 121920833 | TC0400003465.mm.1  | -0.1 | 0.31077  |
| TC0X00001529.mm.1 | XM_987080          | Gm10573 | predicted gene 10573                            | 122300878 | 122313819 | TC0400003466.mm.1  | -0.1 | 0.31077  |
| TC0X00001530.mm.1 | NM_029499          | Ms4a4c  | membrane-spanning 4-domains, subfamily A, m     | 11404770  | 11427246  | TC1900000217.mm.1  | -0.5 | 0.310873 |
| TC0X00001531.mm.1 | XM_993473          | Gm8894  | predicted gene 8894                             | 55420269  | 55422933  | TC1400002083.mm.1  | 0.1  | 0.31091  |
| TC0X00001533.mm.1 | NM_198326          | Nsfl1c  | NSFL1 (p97) cofactor (p47)                      | 151494182 | 151511414 | TC0200002261.mm.1  | -0.1 | 0.310975 |
| TC0X00001544.mm.1 | NM_010107          | Efna1   | efhrin A1                                       | 89271730  | 89281142  | TC0300002344.mm.1  | 0.1  | 0.311187 |
| TC0X00001555.mm.1 | NM_011407          | Slnf1   | schlafen 1                                      | 83116845  | 83122670  | TC1100001239.mm.1  | -0.1 | 0.311274 |
| TC0X00001558.mm.1 | BC058361           | Snrnp35 | small nuclear ribonucleoprotein 35 (U11/U12)    | 124483134 | 124491124 | TC0500001445.mm.1  | 0.1  | 0.311315 |
| TC0X00001563.mm.1 | NM_178911          | Pld4    | phospholipase D family, member 4                | 112760655 | 112760988 | TC1260001272.mm.1  | 0.3  | 0.311472 |
| TC0X00001564.mm.1 | ENSMUST00000083115 | Gm24041 | predicted gene, 24041                           | 58819323  | 58819478  | TC1500001581.mm.1  | 0.1  | 0.311539 |
| TC0X00001571.mm.1 | NM_009003          | Rab4a   | RAB4A, member RAS oncogene family               | 123805985 | 123835291 | TC0800001533.mm.1  | 0.1  | 0.311633 |
| TC0X00001572.mm.1 | NM_146885          | Olfr129 | olfactory receptor 1294                         | 111537349 | 111538290 | TC0200004325.mm.1  | 0.1  | 0.311901 |
| TC0X00001573.mm.1 | NM_144821          | Al31739 | expressed sequence Al317395                     | 40001573  | 40025268  | TC1000002035.mm.1  | 0.1  | 0.312483 |
| TC0X00001574.mm.1 | NM_016857          | Exoc7   | exocyst complex component 7                     | 116287998 | 116307233 | TC1100004113.mm.1  | -0.1 | 0.31255  |
| TC0X00001576.mm.1 | NM_027439          | Atp6ap2 | ATPase, H+ transporting, lysosomal accessory pr | 12587759  | 12617051  | TC0X00000151.mm.1  | -0.1 | 0.312616 |
| TC0X00001585.mm.1 | ENSMUST00000164794 | Rpl29-p | ribosomal protein L29, pseudogene 5             | 30459083  | 30459559  | TC1800001103.mm.1  | -0.4 | 0.312697 |
| TC0X00001593.mm.1 | ENSMUST00000083439 | Gm22740 | predicted gene, 22740                           | 113044144 | 113044252 | TC0500001188.mm.1  | -0.5 | 0.312702 |
| TC0X00001594.mm.1 | ENSMUST00000116735 | Gm22104 | predicted gene, 22104                           | 15250085  | 15250174  | TC1500001248.mm.1  | 0.2  | 0.31275  |
| TC0X00001595.mm.1 | NM_144916          | Tmem150 | transmembrane protein 150A                      | 72355447  | 72359762  | TC0600000849.mm.1  | 0.1  | 0.312767 |
| TC0X00001598.mm.1 | ENSMUST00000116837 | Gm23492 | predicted gene, 23492                           | 49895731  | 49895845  | TC1100000529.mm.1  | 0.3  | 0.312964 |
| TC0X00001599.mm.1 | NM_008422          | Kcnc3   | potassium voltage gated channel, Shaw-related : | 44590664  | 44604754  | TC0700000811.mm.1  | 0.1  | 0.313026 |
| TC0X00001603.mm.1 | NM_009899          | Clca1   | chloride channel calcium activated 1            | 144729677 | 144760977 | TC0300003251.mm.1  | -0.1 | 0.313108 |

|                   |                    |         |                                                 |           |           |                    |      |          |
|-------------------|--------------------|---------|-------------------------------------------------|-----------|-----------|--------------------|------|----------|
| TC0X00001605.mm.1 | NM_133255          | Hook2   | hook homolog 2 (Drosophila)                     | 84990595  | 85003364  | TC0800000975.mm.1  | 0.0  | 0.313211 |
| TC0X00001610.mm.1 | ENSMUST00000082643 | Gm25799 | predicted gene, 25799                           | 34899017  | 34899123  | TC1100000373.mm.1  | -0.6 | 0.31322  |
| TC0X00001620.mm.1 | ENSMUST00000102182 | Gm24951 | predicted gene, 24951                           | 7959530   | 7959638   | TC1900001058.mm.1  | -0.2 | 0.313439 |
| TC0X00001629.mm.1 | NM_011141          | Pou3f1  | POU domain, class 3, transcription factor 1     | 124656807 | 124660655 | TC0400001418.mm.1  | -0.1 | 0.31345  |
| TC0X00001630.mm.1 | NM_010398          | H2-T23  | histocompatibility 2, T region locus 23         | 36029773  | 36032855  | TC1700002819.mm.1  | -0.1 | 0.313495 |
| TC0X00001632.mm.1 | NM_027388          | Pigw    | phosphatidylinositol glycan anchor biosynthesis | 84876313  | 84880285  | TC1100003420.mm.1  | 0.0  | 0.313617 |
| TC0X00001639.mm.1 | NR_039590          | Mir5128 | microRNA 5128                                   | 113951596 | 113993800 | TC0900003162.mm.1  | 0.3  | 0.313681 |
| TC0X00001641.mm.1 | ENSMUST00000082871 | Gm24037 | predicted gene, 24037                           | 85885155  | 85885334  | TC0200003909.mm.1  | -0.1 | 0.313717 |
| TC0X00001642.mm.1 | NM_008206          | H2-Oa   | histocompatibility 2, O region alpha locus      | 34092340  | 34095234  | TC1700000614.mm.1  | -0.3 | 0.313733 |
| TC0X00001643.mm.1 | ENSMUST00000083145 | Gm23464 | predicted gene, 23464                           | 90560556  | 90560702  | TC0300002375.mm.1  | 0.1  | 0.313783 |
| TC0X00001645.mm.1 | ENSMUST00000165950 | Gm7707  | predicted gene 7707                             | 32266593  | 32267748  | TC1400001699.mm.1  | -0.1 | 0.313799 |
| TC0X00001651.mm.1 | ENSMUST00000183058 | Gm21045 | predicted gene, 21045                           | 78068568  | 78069587  | TC0600002536.mm.1  | -0.1 | 0.313857 |
| TC0X00001657.mm.1 | NM_008245          | Hhex    | hematopoietically expressed homeobox            | 37432887  | 37440731  | TC1900000531.mm.1  | 0.1  | 0.31402  |
| TC0X00001661.mm.1 | ENSMUST00000104515 | Gm24066 | predicted gene, 24066                           | 64736402  | 64736532  | TC1200000519.mm.1  | 0.2  | 0.314145 |
| TC0X00001662.mm.1 | OTTMUST00000032001 | RP23-26 | ---                                             | 75192277  | 75192759  | TC0200001107.mm.1  | -0.4 | 0.314246 |
| TC0X00001663.mm.1 | ENSMUST00000157430 | Gm26148 | predicted gene, 26148                           | 15911567  | 15911634  | TC0400002243.mm.1  | 0.3  | 0.314278 |
| TC0X00001666.mm.1 | NM_145406          | Slc10a3 | solute carrier family 10 (sodium/bile acid cotr | 74369217  | 74373349  | TC0X00003435.mm.1  | 0.1  | 0.314415 |
| TC0X00001667.mm.1 | NM_029342          | Nhej1   | nonhomologous end-joining factor 1              | 74967139  | 75046653  | TC0100002598.mm.1  | -0.1 | 0.314715 |
| TC0X00001668.mm.1 | ENSMUST00000122406 | Gm12929 | predicted gene 12929                            | 126476302 | 126476671 | TC0400003543.mm.1  | 0.2  | 0.314734 |
| TC0X00001671.mm.1 | ENSMUST00000175394 | Gm25997 | predicted gene, 25997                           | 98359194  | 98359303  | TC04000003117.mm.1 | 0.3  | 0.3151   |
| TC0X00001676.mm.1 | NM_175331          | Nt5dc3  | 5-nucleotidase domain containing 3              | 86779005  | 86838389  | TC1000003220.mm.1  | -0.1 | 0.315103 |
| TC0X00001684.mm.1 | ENSMUST00000104160 | Gm24665 | predicted gene, 24665                           | 130086041 | 130086169 | TC0200001967.mm.1  | 0.1  | 0.315181 |
| TC0X00001688.mm.1 | ENSMUST00000178616 | LOC1010 | Y-linked testis-specific protein 1-like         | 67948842  | 67949525  | TC0Y00000181.mm.1  | 0.1  | 0.315236 |
| TC0X00001694.mm.1 | NM_001142734       | Gm8994  | predicted gene 8994                             | 136327539 | 136329983 | TC0600001617.mm.1  | -0.1 | 0.315299 |
| TC0X00001700.mm.1 | NM_026512          | Bphl    | biphenyl hydrolase-like (serine hydrolase, brea | 34037641  | 34074074  | TC1300000385.mm.1  | 0.1  | 0.31554  |
| TC0X00001715.mm.1 | ENSMUST00000179509 | Gm25457 | predicted gene, 25457                           | 141298100 | 141298206 | TC0100001311.mm.1  | -0.4 | 0.315548 |
| TC0X00001719.mm.1 | ENSMUST00000104666 | Gm25063 | predicted gene, 25063                           | 12870269  | 12870362  | TC0X00001862.mm.1  | 0.2  | 0.31557  |
| TC0X00001723.mm.1 | ENSMUST00000162696 | Gm16580 | predicted gene 16580                            | 26269336  | 26270379  | TC1700000411.mm.1  | -0.2 | 0.315675 |
| TC0X00001728.mm.1 | ENSMUST00000158282 | Gm25437 | predicted gene, 25437                           | 19275899  | 19276030  | TC1900000328.mm.1  | 0.2  | 0.315723 |
| TC0X00001737.mm.1 | NR_035411          | Mir669g | microRNA 669g                                   | 10477150  | 10477272  | TC0200000112.mm.1  | -0.1 | 0.315767 |
| TC0X00001747.mm.1 | NM_016974          | Dbp     | D site albumin promoter binding protein         | 45705088  | 45710203  | TC0700000861.mm.1  | 0.1  | 0.315845 |
| TC0X00001752.mm.1 | XM_003689099       | LOC1008 | Y-linked testis-specific protein 1-like         | 84562575  | 84564907  | TC0Y00000518.mm.1  | 0.1  | 0.315916 |
| TC0X00001754.mm.1 | NM_001205052       | Jdp2    | Jun dimerization protein 2                      | 85599105  | 85639878  | TC1200000837.mm.1  | 0.0  | 0.316019 |
| TC0X00001760.mm.1 | NM_029875          | Slc35e3 | solute carrier family 35, member E3             | 117733678 | 117746365 | TC1000002943.mm.1  | 0.1  | 0.316059 |
| TC0X00001770.mm.1 | XR_140856          | Gm9990  | predicted gene 9990                             | 97720839  | 97723202  | TC0700001361.mm.1  | -0.1 | 0.316106 |
| TC0X00001775.mm.1 | ENSMUST00000098517 | Gm6658  | predicted gene 6658                             | 90907939  | 90908415  | TC0800002678.mm.1  | 0.0  | 0.316202 |
| TC0X00001780.mm.1 | NM_008655          | Gadd45b | growth arrest and DNA-damage-inducible 45 bet   | 80930090  | 80932204  | TC1000000877.mm.1  | -0.1 | 0.316248 |
| TC0X00001784.mm.1 | NM_026787          | 1110012 | RIKEN cDNA 1110012L19 gene                      | 70385877  | 70389417  | TC0X00000627.mm.1  | -0.1 | 0.316474 |
| TC0X00001785.mm.1 | NM_029643          | Slc52a2 | solute carrier protein 52, member 2             | 76538883  | 76542130  | TC1500000596.mm.1  | 0.1  | 0.316505 |
| TC0X00001787.mm.1 | ENSMUST00000180026 | Gm23379 | predicted gene, 23379                           | 157398262 | 157398368 | TC0300003191.mm.1  | -0.6 | 0.316569 |
| TC0X00001790.mm.1 | NM_172310          | Tarsl2  | threonyl-tRNA synthetase-like 2                 | 65644898  | 65692093  | TC0700004621.mm.1  | 0.0  | 0.316571 |
| TC0X00001791.mm.1 | NCBI_Gene:434033:p | Igkv4-9 | immunoglobulin kappa chain variable 4-91        | 68768555  | 68769103  | TC0600003547.mm.1  | -0.6 | 0.316837 |
| TC0X00001793.mm.1 | BC107174           | V1rd19  | vomer nasal 1 receptor, D19                     | 24003091  | 24004247  | TC0700000364.mm.1  | 0.1  | 0.316926 |
| TC0X00001795.mm.1 | NM_175476          | Arhgap2 | Rho GTPase activating protein 25                | 87458545  | 87533259  | TC0600002656.mm.1  | -0.3 | 0.317015 |
| TC0X00001798.mm.1 | ENSMUST00000103987 | Gm25758 | predicted gene, 25758                           | 89828871  | 89828999  | TC0500000830.mm.1  | -0.1 | 0.317164 |
| TC0X00001805.mm.1 | NM_027896          | Coasy   | Coenzyme A synthase                             | 101082565 | 101086619 | TC1100001640.mm.1  | 0.1  | 0.317223 |
| TC0X00001818.mm.1 | NM_001083928       | Tle3    | transducin-like enhancer of split 3, homolog of | 61372366  | 61418497  | TC0900000776.mm.1  | 0.1  | 0.317438 |
| TC0X00001827.mm.1 | NM_009283          | Stat1   | signal transducer and activator of transcriptio | 52119438  | 52161865  | TC0100000375.mm.1  | -0.3 | 0.31753  |
| TC0X00001849.mm.1 | ENSMUST00000104212 | Gm25417 | predicted gene, 25417                           | 92527578  | 92527708  | TC0900002848.mm.1  | 0.2  | 0.317575 |
| TC0X00001850.mm.1 | ENSMUST00000158288 | Gm22611 | predicted gene, 22611                           | 76974086  | 76974235  | TC1100001110.mm.1  | 0.2  | 0.318054 |
| TC0X00001855.mm.1 | NCBI_Gene:791090:p | Ighv2-6 | immunoglobulin heavy variable 2-6-8             | 113796138 | 113796567 | TC1200002567.mm.1  | -0.4 | 0.318087 |
| TC0X00001862.mm.1 | NM_025701          | Trappc5 | trafficking protein particle complex 5          | 3676299   | 3681255   | TC0800000022.mm.1  | 0.0  | 0.318178 |
| TC0X00001866.mm.1 | ENSMUST00000157930 | Gm22098 | predicted gene, 22098                           | 45875547  | 45875631  | TC0700003026.mm.1  | -0.1 | 0.318234 |
| TC0X00001867.mm.1 | ENSMUST00000121309 | Gm13370 | predicted gene 13370                            | 24985984  | 24986466  | TC0200000394.mm.1  | -0.3 | 0.318392 |
| TC0X00001870.mm.1 | ENSMUST00000089785 | Gm10240 | predicted gene 10240                            | 68309819  | 68310301  | TC1500000498.mm.1  | -0.3 | 0.318392 |
| TC0X00001881.mm.1 | NM_172785          | Zc3h12d | zinc finger CCHC type containing 12D            | 7832470   | 7870397   | TC1000000056.mm.1  | -0.1 | 0.318991 |
| TC0X00001885.mm.1 | NM_011660          | Txn1    | thioredoxin 1                                   | 57943373  | 57956411  | TC0400002731.mm.1  | -0.2 | 0.31902  |
| TC0X00001887.mm.1 | ENSMUST00000170685 | Gm13217 | predicted gene 13217                            | 9041117   | 9042484   | TC0200002928.mm.1  | 0.1  | 0.319079 |
| TC0X00001892.mm.1 | NCBI_Gene:780829:p | Ighv3-6 | immunoglobulin heavy variable 3-6               | 114288152 | 114288582 | TC1200002590.mm.1  | -0.8 | 0.319185 |
| TC0X00001907.mm.1 | NM_176958          | Hif1an  | hypoxia-inducible factor 1, alpha subunit inhib | 44562850  | 44576274  | TC1900000650.mm.1  | -0.1 | 0.31937  |
| TC0X00001917.mm.1 | ENSMUST00000120359 | Gm12104 | predicted gene 12104                            | 30906942  | 30907920  | TC1100002447.mm.1  | -0.1 | 0.31939  |
| TC0X00001922.mm.1 | NM_001085547       | Krtap4- | keratin associated protein 4-8                  | 99779722  | 99780704  | TC1100003736.mm.1  | -0.1 | 0.319405 |
| TC0X00001924.mm.1 | NM_139219          | Defb9   | defensin beta 9                                 | 21881713  | 21885434  | TC0800001855.mm.1  | -0.1 | 0.319545 |
| TC0X00001925.mm.1 | ENSMUST00000157174 | Gm25961 | predicted gene, 25961                           | 89249468  | 89249602  | TC0600002694.mm.1  | -0.1 | 0.319556 |
| TC0X00001926.mm.1 | ENSMUST00000165626 | Gm17332 | predicted gene, 17332                           | 31182376  | 31182462  | TC1100002455.mm.1  | 0.1  | 0.319576 |
| TC0X00001927.mm.1 | NM_026566          | 9430023 | RIKEN cDNA 9430023L20 gene                      | 101284301 | 101290940 | TC1500001068.mm.1  | -0.1 | 0.319638 |
| TC0X00001928.mm.1 | ENSMUST00000157305 | Gm26048 | predicted gene, 26048                           | 140003825 | 140003966 | TC0100001307.mm.1  | 0.4  | 0.31964  |
| TC0X00001929.mm.1 | NM_011625          | Ppp1r13 | protein phosphatase 1, regulatory (inhibitor) s | 111828457 | 111908081 | TC1200002416.mm.1  | -0.1 | 0.319769 |
| TC0X00001944.mm.1 | ENSMUST00000104199 | Gm22656 | predicted gene, 22656                           | 25510865  | 25511035  | TC0500000233.mm.1  | 0.1  | 0.320166 |
| TC0X00001947.mm.1 | NM_145441          | Ubxn2a  | UBX domain protein 2A                           | 4879032   | 4907705   | TC1200001369.mm.1  | 0.1  | 0.320218 |
| TC0X00001963.mm.1 | NR_029855          | Mir365- | microRNA 365-1                                  | 13453840  | 13453926  | TC1600000158.mm.1  | 0.1  | 0.320332 |
| TC0X00001966.mm.1 | ENSMUST00000157912 | Gm23279 | predicted gene, 23279                           | 127731594 | 127731690 | TC0300001291.mm.1  | 0.1  | 0.320381 |
| TC0X00001967.mm.1 | ENSMUST00000104299 | Gm23440 | predicted gene, 23440                           | 78979922  | 78980051  | TC0300000617.mm.1  | 0.1  | 0.320395 |
| TC0X00001975.mm.1 | ENSMUST00000183288 | Gm7833  | predicted gene 7833                             | 94820530  | 94821519  | TC0600001119.mm.1  | -0.1 | 0.320584 |
| TC0X00001978.mm.1 | ENSMUST00000118956 | Gm14584 | predicted gene 14584                            | 53418331  | 53418967  | TC0X00000475.mm.1  | -0.2 | 0.320759 |
| TC0X00001981.mm.1 | NM_172990          | Pank4   | pantothenate kinase 4                           | 154964123 | 154980938 | TC0400002063.mm.1  | -0.1 | 0.320804 |
| TC0X00001984.mm.1 | ENSMUST00000119713 | Gm12141 | predicted gene 12141                            | 41498737  | 41500901  | TC1100000414.mm.1  | -0.2 | 0.320878 |
| TC0X00002007.mm.1 | NM_001099314       | Msmg    | microseminoprotein, prostate associated         | 43583216  | 43584494  | TC0400002532.mm.1  | 0.1  | 0.320926 |

|                   |                    |         |                                                 |           |           |                   |      |          |
|-------------------|--------------------|---------|-------------------------------------------------|-----------|-----------|-------------------|------|----------|
| TC0X00002014.mm.1 | ENSMUST00000175220 | Gm22239 | predicted gene, 22239                           | 10510461  | 10510563  | TC0200000189.mm.1 | -0.1 | 0.32098  |
| TC0X00002016.mm.1 | NM_001007567       | Sld7a6o | solute carrier family 7, member 6 opposite stra | 106200438 | 106210933 | TC0800002854.mm.1 | -0.1 | 0.321011 |
| TC0X00002023.mm.1 | NM_025689          | Cdc51   | coiled-coil domain containing 51                | 109082496 | 109093363 | TC0900001433.mm.1 | 0.0  | 0.3211   |
| TC0X00002032.mm.1 | NM_022423          | Rnf187  | ring finger protein 187                         | 58932288  | 58938916  | TC1100002836.mm.1 | -0.2 | 0.32117  |
| TC0X00002042.mm.1 | NM_013590          | Lyz1    | lysozyme 1                                      | 117287795 | 117292868 | TC1000002930.mm.1 | 0.4  | 0.32118  |
| TC0X00002045.mm.1 | ENSMUST00000151901 | 1700031 | RIKEN cDNA 1700031F10 gene                      | 88222602  | 88225678  | TC0600002680.mm.1 | -0.1 | 0.321267 |
| TC0X00002051.mm.1 | NM_008469          | Krt15   | keratin 15                                      | 100131758 | 100135949 | TC1100003757.mm.1 | -0.1 | 0.32128  |
| TC0X00002052.mm.1 | ENSMUST00000178263 | Gm12651 | predicted gene 12651                            | 93904024  | 93904470  | TC0400003062.mm.1 | 0.2  | 0.321378 |
| TC0X00002058.mm.1 | NM_001167593       | Spata31 | spermatogenesis associated 31 subfamily D, mer  | 59712284  | 59719289  | TC1300000726.mm.1 | -0.1 | 0.321696 |
| TC0X00002061.mm.1 | NM_008599          | Cxcl9   | chemokine (C-X-C motif) ligand 9                | 92321331  | 92328079  | TC0500002755.mm.1 | 0.3  | 0.321824 |
| TC0X00002063.mm.1 | NM_016783          | Pgrmc1  | progesterone receptor membrane component 1      | 36598206  | 36606079  | TC0X00000323.mm.1 | 0.2  | 0.32187  |
| TC0X00002069.mm.1 | ENSMUST00000168516 | Gm17709 | predicted gene, 17709                           | 121972727 | 121973822 | TC0800003064.mm.1 | -0.2 | 0.321897 |
| TC0X00002074.mm.1 | ENSMUST00000071737 | Gm10126 | predicted gene 10126                            | 73988963  | 73989148  | TC1300002308.mm.1 | -0.4 | 0.321972 |
| TC0X00002085.mm.1 | NM_001111141       | Sprtn   | SprT-like N-terminal domain                     | 124897886 | 124903813 | TC0800001551.mm.1 | -0.1 | 0.321983 |
| TC0X00002088.mm.1 | NM_025966          | 2310039 | RIKEN cDNA 2310039H08 gene                      | 46772635  | 46773407  | TC1700000902.mm.1 | 0.1  | 0.322372 |
| TC0X00002090.mm.1 | NM_009275          | Srprb   | signal recognition particle receptor, B subunit | 103188033 | 103202137 | TC0900003343.mm.1 | 0.1  | 0.322429 |
| TC0X00002094.mm.1 | ENSMUST00000175420 | Gm22183 | predicted gene, 22183                           | 126036827 | 126036899 | TC1000001532.mm.1 | 0.1  | 0.322736 |
| TC0X00002099.mm.1 | ENSMUST00000120244 | Gm12437 | predicted gene 12437                            | 48807137  | 48807391  | TC0400000538.mm.1 | 0.2  | 0.32274  |
| TC0X00002100.mm.1 | ENSMUST00000177971 | Gm22392 | predicted gene, 22392                           | 44432595  | 44432701  | TC1500000352.mm.1 | -0.6 | 0.322867 |
| TC0X00002103.mm.1 | ENSMUST00000116649 | Gm12419 | predicted gene 12419                            | 84923554  | 84924189  | TC0400002969.mm.1 | -0.1 | 0.32294  |
| TC0X00002106.mm.1 | NM_001039889       | Smok3b  | sperm motility kinase 3B                        | 138037224 | 138050635 | TC0500003715.mm.1 | 0.1  | 0.323125 |
| TC0X00002113.mm.1 | ENSMUST00000083058 | Gm22421 | predicted gene, 22421                           | 132082286 | 132082392 | TC0300002965.mm.1 | -0.4 | 0.323301 |
| TC0X00002127.mm.1 | NR_035426          | Mir669e | microRNA 669e                                   | 39467448  | 40227787  | TC0800002101.mm.1 | 0.4  | 0.323375 |
| TC0X00002131.mm.1 | NR_039588          | Mir5126 | microRNA 5126                                   | 84695839  | 84695915  | TC0100000724.mm.1 | 0.1  | 0.323393 |
| TC0X00002142.mm.1 | NM_025821          | Lurap1l | leucine rich adaptor protein 1-like             | 80910646  | 80955628  | TC0400000811.mm.1 | 0.1  | 0.323833 |
| TC0X00002147.mm.1 | NM_028112          | Seh1l   | SEH1-like (S. cerevisiae                        | 67774876  | 67795487  | TC1800000710.mm.1 | -0.1 | 0.32398  |
| TC0X00002161.mm.1 | ENSMUST00000158339 | Gm22087 | predicted gene, 22087                           | 44597240  | 44597327  | TC1000002102.mm.1 | 0.1  | 0.32414  |
| TC0X00002176.mm.1 | NM_145743          | Lace1   | lactation elevated 1                            | 42312585  | 42478565  | TC1000002063.mm.1 | 0.1  | 0.324194 |
| TC0X00002180.mm.1 | ENSMUST00000117466 | Gm14944 | predicted gene 14944                            | 122246835 | 122246966 | TC0X00002918.mm.1 | -0.1 | 0.324433 |
| TC0X00002196.mm.1 | NM_001163713       | Tufm    | Tu translation elongation factor, mitochondrial | 126487355 | 126490731 | TC0700001804.mm.1 | -0.1 | 0.324447 |
| TC0X00002197.mm.1 | ENSMUST00000104390 | Gm25631 | predicted gene, 25631                           | 105223269 | 105223398 | TC1300002611.mm.1 | -0.1 | 0.3247   |
| TC0X00002202.mm.1 | NM_178924          | Upk1b   | uropalakin 1B                                   | 38773184  | 38800203  | TC1600001616.mm.1 | 0.3  | 0.324788 |
| TC0X00002207.mm.1 | ENSMUST00000184045 | RP23-44 | N/A                                             | 4359027   | 4359507   | TC0600000008.mm.1 | 0.1  | 0.324933 |
| TC0X00002211.mm.1 | ENSMUST00000185004 | AL67207 | N/A                                             | 24617011  | 24617117  | TC0X00001966.mm.1 | 0.4  | 0.325076 |
| TC0X00002231.mm.1 | ENSMUST00000122223 | Gm12819 | predicted gene 12819                            | 112512740 | 112521472 | TC0400001197.mm.1 | 0.1  | 0.325375 |
| TC0X00002238.mm.1 | ENSMUST00000158752 | Gm22135 | predicted gene, 22135                           | 43160795  | 43160902  | TC1900001536.mm.1 | -0.1 | 0.3254   |
| TC0X00002241.mm.1 | NM_024240          | Gins4   | GINS complex subunit 4 (Sld5 homolog)           | 23226610  | 23237668  | TC0800001884.mm.1 | -0.2 | 0.325487 |
| TC0X00002242.mm.1 | NM_010870          | Naip5   | NLR family, apoptosis inhibitory protein 5      | 100211739 | 100247336 | TC1300002531.mm.1 | 0.1  | 0.325671 |
| TC0X00002247.mm.1 | NM_146947          | Olfr338 | olfactory receptor 338                          | 36376778  | 36377698  | TC0200000657.mm.1 | -0.1 | 0.325695 |
| TC0X00002250.mm.1 | ENSMUST00000119638 | Gm13222 | predicted gene 13222                            | 145579036 | 145579173 | TC0400001866.mm.1 | 0.1  | 0.32575  |
| TC0X00002258.mm.1 | NM_025848          | Sdhd    | succinate dehydrogenase complex, subunit D, in  | 50596338  | 50603849  | TC0900002271.mm.1 | 0.2  | 0.325817 |
| TC0X00002263.mm.1 | NM_001177543 //    | 610010  | RIKEN cDNA 0610010B08 gene // predicted gen     | 175965331 | 175981734 | TC0200002731.mm.1 | 0.3  | 0.325891 |
| TC0X00002273.mm.1 | ENSMUST00000158859 | Gm24735 | predicted gene, 24735                           | 22822428  | 22822545  | TC0800001878.mm.1 | -0.2 | 0.326051 |
| TC0X00002276.mm.1 | ENSMUST00000158642 | Gm22890 | predicted gene, 22890                           | 84323209  | 84323352  | TC1500001986.mm.1 | -0.1 | 0.326226 |
| TC0X00002284.mm.1 | NM_207540          | Mrgprx1 | MAS-related GPR, member X1                      | 48020971  | 48027601  | TC0700003061.mm.1 | -0.1 | 0.326497 |
| TC0X00002286.mm.1 | ENSMUST00000083341 | n-R5s21 | nuclear encoded rRNA 5S 217                     | 138878262 | 138878377 | TC0100003178.mm.1 | 0.1  | 0.326737 |
| TC0X00002287.mm.1 | NM_175421          | Plekhh2 | pleckstrin homology domain containing, family E | 34849959  | 34879585  | TC0100000233.mm.1 | 0.1  | 0.326775 |
| TC0X00002304.mm.1 | NM_018756          | Tcstv1  | 2-cell-stage, variable group, member 1          | 119893388 | 119894767 | TC1300002751.mm.1 | -0.1 | 0.326888 |
| TC0X00002311.mm.1 | ENSMUST00000117737 | Gm8749  | predicted gene 8749                             | 78357794  | 78358124  | TC0X00002512.mm.1 | -0.1 | 0.326892 |
| TC0X00002313.mm.1 | ENSMUST00000119998 | Mup-ps2 | major urinary protein, pseudogene 21            | 62029342  | 62031662  | TC0400002778.mm.1 | 0.3  | 0.327018 |
| TC0X00002315.mm.1 | ENSMUST00000121699 | Gm15065 | predicted gene 15065                            | 75705409  | 75705681  | TC0X00000750.mm.1 | -0.2 | 0.327128 |
| TC0X00002316.mm.1 | ENSMUST00000083095 | Gm25199 | predicted gene, 25199                           | 103445697 | 103445800 | TC0300002625.mm.1 | -0.3 | 0.327258 |
| TC0X00002319.mm.1 | ENSMUST00000082809 | Gm24856 | predicted gene, 24856                           | 93413218  | 93413324  | TC1100003550.mm.1 | -0.5 | 0.32732  |
| TC0X00002320.mm.1 | NM_053092          | Kars    | lysyl-tRNA synthetase                           | 111993439 | 112011354 | TC0800002961.mm.1 | -0.2 | 0.327619 |
| TC0X00002323.mm.1 | ENSMUST00000183517 | RP23-29 | N/A                                             | 72613790  | 72617053  | TC0900002644.mm.1 | -0.1 | 0.327671 |
| TC0X00002325.mm.1 | NM_001204908       | Zfp648  | zinc finger protein 648                         | 154201187 | 154205674 | TC0100001392.mm.1 | -0.1 | 0.327896 |
| TC0X00002330.mm.1 | NM_144794          | Tmem63a | transmembrane protein 63a                       | 180942344 | 180975112 | TC0100001724.mm.1 | 0.1  | 0.327963 |
| TC0X00002338.mm.1 | NM_019479          | Hes6    | hairy and enhancer of split 6                   | 91411483  | 91414038  | TC0100002800.mm.1 | -0.1 | 0.327995 |
| TC0X00002341.mm.1 | ENSMUST00000083388 | Gm22055 | predicted gene, 22055                           | 45548743  | 45548849  | TC0400000490.mm.1 | -0.1 | 0.328046 |
| TC0X00002346.mm.1 | NM_025591          | Fam136a | family with sequence similarity 136, member A   | 86365682  | 86370058  | TC0600000985.mm.1 | -0.1 | 0.32868  |
| TC0X00002348.mm.1 | NM_199252          | Unc93a  | unc-93 homolog A (C. elegans)                   | 13108617  | 13131791  | TC1700001465.mm.1 | 0.1  | 0.329011 |
| TC0X00002353.mm.1 | ENSMUST00000082737 | Gm22807 | predicted gene, 22807                           | 20847753  | 20847881  | TC1100002317.mm.1 | -0.5 | 0.329012 |
| TC0X00002362.mm.1 | NM_001033281       | Prdm6   | PR domain containing 6                          | 53464516  | 53575907  | TC1800000538.mm.1 | 0.0  | 0.329289 |
| TC0X00002372.mm.1 | NM_010070          | Dok1    | docking protein 1                               | 83030934  | 83033471  | TC0600002554.mm.1 | -0.1 | 0.329434 |
| TC0X00002378.mm.1 | ENSMUST00000118719 | Gm4993  | predicted gene 4993                             | 120957711 | 120958884 | TC0X00001185.mm.1 | -0.1 | 0.329464 |
| TC0X00002380.mm.1 | ENSMUST00000082583 | Gm22454 | predicted gene, 22454                           | 107096951 | 107097057 | TC0900001360.mm.1 | -0.3 | 0.329733 |
| TC0X00002381.mm.1 | NR_029753          | Mir98   | microRNA 98                                     | 151913214 | 151913321 | TC0X00001530.mm.1 | 0.1  | 0.329756 |
| TC0X00002384.mm.1 | NM_008747          | Ntsr2   | neurotensin receptor 2                          | 16653470  | 16660236  | TC1200000130.mm.1 | 0.1  | 0.329777 |
| TC0X00002388.mm.1 | ENSMUST00000083873 | Gm23038 | predicted gene, 23038                           | 155788365 | 155788468 | TC0300003184.mm.1 | -0.2 | 0.329993 |
| TC0X00002394.mm.1 | ENSMUST00000179841 | Gm24267 | predicted gene, 24267                           | 107756602 | 107756708 | TC0100002912.mm.1 | -0.5 | 0.330004 |
| TC0X00002404.mm.1 | NR_029770          | Mir341  | microRNA 341                                    | 109611500 | 109611595 | TC1200001143.mm.1 | -0.1 | 0.330153 |
| TC0X00002415.mm.1 | NM_016778          | Bok     | BCL2-related ovarian killer protein             | 93685694  | 93695764  | TC0100000942.mm.1 | 0.0  | 0.330296 |
| TC0X00002424.mm.1 | NM_198631          | Zc3h4   | zinc finger CCHH-type containing 4              | 16401196  | 16437696  | TC0700000225.mm.1 | -0.1 | 0.330335 |
| TC0X00002428.mm.1 | ENSMUST00000104052 | Gm23271 | predicted gene, 23271                           | 38511173  | 38511296  | TC0900000405.mm.1 | 0.1  | 0.330482 |
| TC0X00002433.mm.1 | NM_025433          | Rpl7l1  | ribosomal protein L7-like 1                     | 46773907  | 46782656  | TC1700002191.mm.1 | -0.1 | 0.330622 |
| TC0X00002441.mm.1 | ENSMUST00000102244 | Gm23255 | predicted gene, 23255                           | 73641396  | 73641505  | TC0800002481.mm.1 | 0.2  | 0.330768 |
| TC0X00002447.mm.1 | ENSMUST00000104081 | Gm24434 | predicted gene, 24434                           | 39621415  | 39621546  | TC1200000353.mm.1 | 0.1  | 0.330853 |
| TC0X00002458.mm.1 | NM_183253          | Defa21  | defensin, alpha, 21                             | 21025545  | 21026517  | TC0800000211.mm.1 | -0.1 | 0.330859 |

|                   |                    |         |                                                 |           |           |                    |      |          |
|-------------------|--------------------|---------|-------------------------------------------------|-----------|-----------|--------------------|------|----------|
| TC0X00002467.mm.1 | NM_138675          | Med9    | mediator of RNA polymerase II transcription, su | 59948206  | 59963306  | TC1100000742.mm.1  | 0.0  | 0.330969 |
| TC0X00002472.mm.1 | ENSMUST00000157727 | Gm24013 | predicted gene, 24013                           | 3788892   | 3788990   | TC1100000023.mm.1  | -0.1 | 0.331048 |
| TC0X00002495.mm.1 | NM_009446          | Tuba3a  | tubulin, alpha 3A                               | 125278274 | 125286042 | TC06000003144.mm.1 | -0.1 | 0.331106 |
| TC0X00002497.mm.1 | NR_030417          | Mir744  | microRNA 744                                    | 65734733  | 65734832  | TC1100002990.mm.1  | 0.1  | 0.331151 |
| TC0X00002498.mm.1 | ENSMUST00000131139 | Gm10059 | predicted pseudogene 10059                      | 33759366  | 33759536  | TC0500000362.mm.1  | -0.5 | 0.331348 |
| TC0X00002503.mm.1 | ENSMUST00000121516 | Gm15057 | predicted gene 15057                            | 145990742 | 145991275 | TC0X00001437.mm.1  | 0.1  | 0.331493 |
| TC0X00002512.mm.1 | NM_019507          | Tbx21   | T-box 21                                        | 97098007  | 97115331  | TC1100003636.mm.1  | 0.0  | 0.331497 |
| TC0X00002515.mm.1 | NM_010893          | Neu1    | neuraminidase 1                                 | 34931253  | 34937297  | TC1700000652.mm.1  | 0.1  | 0.331613 |
| TC0X00002519.mm.1 | ENSMUST00000182862 | Gm7456  | predicted gene 7456                             | 49140256  | 49141266  | TC1200000407.mm.1  | -0.1 | 0.331663 |
| TC0X00002531.mm.1 | NM_026073          | Rabl5   | RAB, member of RAS oncogene family-like 5       | 136908150 | 136913244 | TC0500001610.mm.1  | 0.1  | 0.331745 |
| TC0X00002532.mm.1 | ENSMUST00000083362 | Gm26122 | predicted gene, 26122                           | 94184492  | 94184573  | TC1000002703.mm.1  | -0.7 | 0.331778 |
| TC0X00002533.mm.1 | NM_001167535       | Vmn1r3  | vomeronasal 1 receptor 3                        | 3184348   | 3185358   | TC0400002116.mm.1  | 0.1  | 0.331874 |
| TC0X00002535.mm.1 | ENSMUST00000082521 | n-R5s56 | nuclear encoded rRNA 5S 56                      | 103396202 | 103396306 | TC1300001160.mm.1  | -0.4 | 0.331988 |
| TC0X00002536.mm.1 | ENSMUST00000118689 | Gm11405 | predicted gene 11405                            | 74228197  | 74229752  | TC0400000776.mm.1  | -0.2 | 0.332112 |
| TC0X00002541.mm.1 | NM_145916          | Zfp7    | zinc finger protein 7                           | 76879259  | 76892395  | TC1500000612.mm.1  | 0.0  | 0.332159 |
| TC0X00002544.mm.1 | NM_013778          | Akr1c13 | aldo-keto reductase family 1, member C13        | 4191184   | 4205603   | TC1300000019.mm.1  | 0.1  | 0.332191 |
| TC0X00002549.mm.1 | NCBI_Gene:780825:p | Ighv9-3 | immunoglobulin heavy variable V9-3              | 114140692 | 114141122 | TC1200002584.mm.1  | -0.7 | 0.332629 |
| TC0X00002550.mm.1 | ENSMUST00000082620 | n-R5s17 | nuclear encoded rRNA 5S 173                     | 107401319 | 107401437 | TC0500001075.mm.1  | 0.3  | 0.332925 |
| TC0X00002559.mm.1 | ENSMUST00000105066 | Gm14180 | predicted gene 14180                            | 99734213  | 99734290  | TC1100003733.mm.1  | -0.2 | 0.333025 |
| TC0X00002568.mm.1 | NM_032541          | Hamp    | hepcidin antimicrobial peptide                  | 30942368  | 30944017  | TC0700002783.mm.1  | -0.1 | 0.333059 |
| TC0X00002579.mm.1 | ENSMUST00000179510 | Gm24520 | predicted gene, 24520                           | 17610766  | 17610875  | TC0700000254.mm.1  | -0.1 | 0.333438 |
| TC0X00002581.mm.1 | NM_030251          | Abtb1   | ankyrin repeat and BTB (POZ) domain containing  | 88835914  | 88841935  | TC0600002688.mm.1  | -0.1 | 0.333458 |
| TC0X00002589.mm.1 | ENSMUST00000178103 | Gm24797 | predicted gene, 24797                           | 38792638  | 38792744  | TC0700000697.mm.1  | -0.3 | 0.333524 |
| TC0X00002608.mm.1 | ENSMUST00000161575 | Gm15838 | predicted gene 15838                            | 44018470  | 44018649  | TC0100002270.mm.1  | -0.2 | 0.333528 |
| TC0X00002609.mm.1 | ENSMUST00000118804 | Gm15707 | predicted gene 15707                            | 145315613 | 145316608 | TC0600003420.mm.1  | 0.1  | 0.333889 |
| TC0X00002616.mm.1 | XM_001475316       | Gm2904  | predicted pseudogene 2904                       | 3051649   | 3052513   | TC1400001355.mm.1  | 0.2  | 0.334272 |
| TC0X00002626.mm.1 | ENSMUST00000117331 | Gm16221 | predicted gene 16221                            | 75945295  | 75945687  | TC1000002394.mm.1  | -0.1 | 0.334606 |
| TC0X00002635.mm.1 | ENSMUST00000179346 | Gm21060 | predicted gene, 21060                           | 61296902  | 61297069  | TC1900001764.mm.1  | -0.1 | 0.334662 |
| TC0X00002652.mm.1 | ENSMUST00000122169 | Gm11203 | predicted gene 11203                            | 79897222  | 79897962  | TC1100001191.mm.1  | -0.1 | 0.33471  |
| TC0X00002653.mm.1 | NR_004419          | Rny1    | RNA, Y1 small cytoplasmic, Ro-associated        | 47788069  | 47788180  | TC06000002211.mm.1 | -0.5 | 0.334739 |
| TC0X00002675.mm.1 | NM_024178          | Alg14   | asparagine-linked glycosylation 14              | 121291817 | 121362011 | TC0300001229.mm.1  | 0.2  | 0.334979 |
| TC0X00002678.mm.1 | XM_003688913       | Gm10340 | predicted gene 10340                            | 3332626   | 3354799   | TC1400002783.mm.1  | 0.1  | 0.335299 |
| TC0X00002685.mm.1 | NM_029816          | 2610028 | RIKEN cDNA 2610028H24 gene                      | 76449081  | 76461218  | TC1000000742.mm.1  | 0.0  | 0.335508 |
| TC0X00002686.mm.1 | NM_030711          | Erap1   | endoplasmic reticulum aminopeptidase 1          | 74639866  | 74691875  | TC1300000904.mm.1  | -0.1 | 0.335851 |
| TC0X00002696.mm.1 | NM_144826          | Utp6    | UTP6, small subunit (SSU) processome compone    | 79932321  | 79962390  | TC1100003334.mm.1  | -0.1 | 0.335891 |
| TC0X00002701.mm.1 | XM_001474021       | Gm20840 | predicted gene, 20840                           | 23868563  | 23869246  | TC0Y00000067.mm.1  | 0.1  | 0.335997 |
| TC0X00002706.mm.1 | XM_001476818       | Gm20898 | predicted gene, 20898                           | 36091591  | 36092274  | TC0Y00000117.mm.1  | 0.1  | 0.335997 |
| TC0X00002725.mm.1 | XM_003689059       | Gm21275 | predicted gene, 21275                           | 53125523  | 53126206  | TC0Y00000371.mm.1  | 0.1  | 0.335997 |
| TC0X00002727.mm.1 | XM_001478227       | Gm20934 | predicted gene, 20934                           | 65723236  | 65723919  | TC0Y00000430.mm.1  | 0.1  | 0.335997 |
| TC0X00002735.mm.1 | XM_001474479       | Gm20847 | predicted gene, 20847                           | 72894521  | 72895204  | TC0Y00000456.mm.1  | 0.1  | 0.335997 |
| TC0X00002736.mm.1 | XM_001474518       | Gm20848 | predicted gene, 20848                           | 72968026  | 72968709  | TC0Y00000457.mm.1  | 0.1  | 0.335997 |
| TC0X00002737.mm.1 | NM_021457          | Fzd1    | frizzled homolog 1 (Drosophila)                 | 4753839   | 4758216   | TC0500001896.mm.1  | 0.1  | 0.336076 |
| TC0X00002740.mm.1 | ENSMUST00000179961 | Gm24180 | predicted gene, 24180                           | 43918777  | 43918886  | TC0100002268.mm.1  | -0.1 | 0.336393 |
| TC0X00002741.mm.1 | ENSMUST00000093715 | Gm24704 | predicted gene, 24704                           | 24562074  | 24562180  | TC0300000150.mm.1  | -0.3 | 0.336431 |
| TC0X00002757.mm.1 | ENSMUST00000102029 | Gm24121 | predicted gene, 24121                           | 86928903  | 86929008  | TC0500002691.mm.1  | -0.3 | 0.336494 |
| TC0X00002759.mm.1 | NM_173432          | Pskh1   | protein serine kinase H1                        | 105900441 | 105931805 | TC0800001233.mm.1  | 0.1  | 0.33655  |
| TC0X00002762.mm.1 | ENSMUST00000178059 | Gm24955 | predicted gene, 24955                           | 119528000 | 119528106 | TC0400001337.mm.1  | -0.2 | 0.336558 |
| TC0X00002768.mm.1 | ENSMUST00000161613 | Gm3076  | predicted gene 3076                             | 154132340 | 154132790 | TC0300001550.mm.1  | -0.2 | 0.336677 |
| TC0X00002769.mm.1 | NM_027127          | Gpx8    | glutathione peroxidase 8 (putative)             | 113042761 | 113046388 | TC1300002689.mm.1  | 0.3  | 0.336686 |
| TC0X00002783.mm.1 | NM_207567          | Olfr119 | olfactory receptor 1198                         | 88745960  | 88746886  | TC02000004026.mm.1 | 0.1  | 0.336731 |
| TC0X00002787.mm.1 | NM_145932          | Slc51a  | solute carrier family 51, alpha subunit         | 32475522  | 32487879  | TC1600001509.mm.1  | 0.1  | 0.336917 |
| TC0X00002792.mm.1 | ENSMUST00000182995 | Gm5335  | predicted gene 5335                             | 72989154  | 72990153  | TC0700003488.mm.1  | -0.1 | 0.337    |
| TC0X00002793.mm.1 | NM_019418          | Tnfsf14 | tumor necrosis factor (ligand) superfamily, mem | 57189474  | 57194189  | TC1700002351.mm.1  | 0.0  | 0.337159 |
| TC0X00002798.mm.1 | ENSMUST00000183205 | Gm7627  | predicted gene 7627                             | 69605842  | 69606840  | TC0700003470.mm.1  | -0.1 | 0.337249 |
| TC0X00002803.mm.1 | ENSMUST00000179464 | Gm26297 | predicted gene, 26297                           | 46219836  | 46219967  | TC1600000685.mm.1  | -0.1 | 0.337264 |
| TC0X00002806.mm.1 | ENSMUST00000178054 | Gm26430 | predicted gene, 26430                           | 78533458  | 78533564  | TC1800000840.mm.1  | -0.6 | 0.337267 |
| TC0X00002813.mm.1 | ENSMUST00000175150 | Gm23810 | predicted gene, 23810                           | 40518818  | 40518891  | TC0300000304.mm.1  | 0.2  | 0.337302 |
| TC0X00002821.mm.1 | ENSMUST00000167995 | Gm4781  | predicted gene 4781                             | 100396287 | 100397072 | TC1000002774.mm.1  | -0.1 | 0.337432 |
| TC0X00002826.mm.1 | NM_178923          | Scaf4   | SR-related CTD-associated factor 4              | 90228952  | 90284425  | TC1600002045.mm.1  | -0.1 | 0.337497 |
| TC0X00002834.mm.1 | ENSMUST00000175070 | Gm23636 | predicted gene, 23636                           | 22666658  | 22666752  | TC0200000349.mm.1  | 0.2  | 0.337536 |
| TC0X00002835.mm.1 | ENSMUST00000157179 | Gm23434 | predicted gene, 23434                           | 99017364  | 99017463  | TC0100000981.mm.1  | 0.1  | 0.337892 |
| TC0X00002838.mm.1 | NM_025305          | Mrps7   | mitochondrial ribosomal protein S7              | 115603925 | 115608036 | TC1100004280.mm.1  | 0.1  | 0.337921 |
| TC0X00002844.mm.1 | NM_001039160       | Gvin1   | GTPase, very large interferon inducible 1       | 106156535 | 106215340 | TC0700004002.mm.1  | 0.3  | 0.338065 |
| TC0X00002845.mm.1 | NM_026502          | 1110004 | RIKEN cDNA 1110004E09 gene                      | 90925809  | 90934927  | TC1600002059.mm.1  | 0.0  | 0.338065 |
| TC0X00002848.mm.1 | ENSMUST00000157170 | Gm25965 | predicted gene, 25965                           | 142795102 | 142795194 | TC0300001451.mm.1  | -0.1 | 0.338124 |
| TC0X00002853.mm.1 | NM_145421          | Abhd17a | abhydrolase domain containing 17A               | 80583649  | 80590341  | TC1000002506.mm.1  | -0.1 | 0.338193 |
| TC0X00002854.mm.1 | ENSMUST00000122793 | n-R5s19 | nuclear encoded rRNA 5S 19                      | 6144732   | 6144851   | TC1900000103.mm.1  | 0.1  | 0.338221 |
| TC0X00002857.mm.1 | NM_175095          | Comm2   | COMM domain containing 2                        | 57642904  | 57651715  | TC0300002030.mm.1  | -0.1 | 0.338257 |
| TC0X00002860.mm.1 | ENSMUST00000175052 | Mir466m | microRNA 466m                                   | 10466663  | 10466746  | TC0200000090.mm.1  | 0.2  | 0.338385 |
| TC0X00002861.mm.1 | NM_013756          | Defb3   | defensin beta 3                                 | 19293360  | 19295339  | TC0800000185.mm.1  | -0.1 | 0.338431 |
| TC0X00002871.mm.1 | ENSMUST00000158585 | Gm23386 | predicted gene, 23386                           | 19693155  | 19693298  | TC1100002283.mm.1  | -0.1 | 0.338472 |
| TC0X00002873.mm.1 | NR_045380          | 1700034 | FUN14 domain containing 2 pseudogene            | 40900199  | 40902543  | TC0300001906.mm.1  | 0.1  | 0.338526 |
| TC0X00002874.mm.1 | NR_035457          | Mir1936 | microRNA 1936                                   | 102684928 | 102685020 | TC1200002254.mm.1  | 0.1  | 0.338567 |
| TC0X00002886.mm.1 | NM_026390          | Ubxn4   | UBX domain protein 4                            | 128244162 | 128279377 | TC0100001138.mm.1  | -0.2 | 0.338937 |
| TC0X00002887.mm.1 | NM_011722          | Dctn6   | dynactin 6                                      | 34090420  | 34108796  | TC0800002021.mm.1  | -0.1 | 0.338965 |
| TC0X00002888.mm.1 | NCBI_Gene:780831:p | Ighv3-8 | immunoglobulin heavy variable V3-8              | 114322374 | 114323087 | TC1200002592.mm.1  | -0.2 | 0.339034 |
| TC0X00002891.mm.1 | ENSMUST00000179978 | Gm24466 | predicted gene, 24466                           | 72130210  | 72130318  | TC1200001901.mm.1  | 0.2  | 0.339165 |
| TC0X00002892.mm.1 | NM_026344          | Dph2    | DPH2 homolog (S. cerevisiae)                    | 117888643 | 117892032 | TC0400003380.mm.1  | 0.0  | 0.339248 |

|                   |                    |         |                                                 |           |           |                    |      |          |
|-------------------|--------------------|---------|-------------------------------------------------|-----------|-----------|--------------------|------|----------|
| TC0X00002899.mm.1 | NM_022017          | Trpv4   | transient receptor potential cation channel, su | 114622152 | 114658421 | TC0500003063.mm.1  | 0.1  | 0.339512 |
| TC0X00002907.mm.1 | ENSMUST00000104433 | Gm23772 | predicted gene, 23772                           | 22846868  | 22846969  | TC1100000228.mm.1  | -0.2 | 0.339547 |
| TC0X00002916.mm.1 | ENSMUST00000180118 | Gm22756 | predicted gene, 22756                           | 151062004 | 151062110 | TC0100003242.mm.1  | -0.6 | 0.339643 |
| TC0X00002918.mm.1 | ENSMUST00000101885 | Gm22003 | predicted gene, 22003                           | 4758547   | 4758653   | TC1200000031.mm.1  | -0.6 | 0.339643 |
| TC0X00002932.mm.1 | NM_146738          | Olfr497 | olfactory receptor 497                          | 108422571 | 108423517 | TC0700001596.mm.1  | -0.1 | 0.339843 |
| TC0X00002933.mm.1 | NM_008356          | Il13ra2 | interleukin 13 receptor, alpha 2                | 147383476 | 147429192 | TC0X000003143.mm.1 | 0.1  | 0.339844 |
| TC0X00002934.mm.1 | ENSMUST00000175530 | Gm26233 | predicted gene, 26233                           | 18449271  | 18449340  | TC0600001909.mm.1  | 0.1  | 0.340138 |
| TC0X00002935.mm.1 | ENSMUST00000120256 | Gm4992  | predicted pseudogene 4992                       | 121913227 | 121913994 | TC0X00001192.mm.1  | -0.2 | 0.340436 |
| TC0X00002937.mm.1 | ENSMUST00000185108 | AC17025 | N/A                                             | 178363401 | 178363521 | TC0100003646.mm.1  | 0.1  | 0.340459 |
| TC0X00002938.mm.1 | ENSMUST00000104272 | Gm26419 | predicted gene, 26419                           | 32065910  | 32066042  | TC1600000428.mm.1  | -0.1 | 0.340659 |
| TC0X00002939.mm.1 | ENSMUST00000082949 | Gm24203 | predicted gene, 24203                           | 98275725  | 98275838  | TC0400000978.mm.1  | -0.2 | 0.340932 |
| TC0X00002940.mm.1 | XM_003084719       | Dnajc19 | Dnaj (Hsp40) homolog, subfamily C, member 19,   | 103882575 | 103883119 | TC0700003916.mm.1  | -0.1 | 0.340956 |
| TC0X00002941.mm.1 | NM_027044          | Pfdn5   | prefoldin 5                                     | 102326116 | 102331490 | TC1500002337.mm.1  | -0.2 | 0.341094 |
| TC0X00002942.mm.1 | NM_019914          | Mllt11  | myeloid/lymphoid or mixed-lineage leukemia (tr  | 95218544  | 95228677  | TC0300002470.mm.1  | -0.1 | 0.341124 |
| TC0X00002954.mm.1 | ENSMUST00000179396 | Gm23793 | predicted gene, 23793                           | 130557348 | 130557464 | TC1000003211.mm.1  | -0.1 | 0.341211 |
| TC0X00002958.mm.1 | ENSMUST00000182082 | Gm8957  | predicted gene 8957                             | 14511084  | 14512095  | TC0300001665.mm.1  | -0.1 | 0.341876 |
| TC0X00002964.mm.1 | ENSMUST00000083811 | Gm25004 | predicted gene, 25004                           | 95524044  | 95524204  | TC0400000960.mm.1  | 0.1  | 0.341931 |
| TC0X00002967.mm.1 | XM_001478071       | Gm10338 | predicted gene 10338                            | 7580617   | 7595592   | TC1400002855.mm.1  | 0.1  | 0.341948 |
| TC0X00002968.mm.1 | NM_001083936       | Pth1r   | parathyroid hormone 1 receptor                  | 110722085 | 110747145 | TC0900003116.mm.1  | 0.2  | 0.341948 |
| TC0X00002976.mm.1 | NM_198936          | Slu7    | SLU7 splicing factor homolog (S. cerevisiae)    | 43433731  | 43447981  | TC1100000426.mm.1  | -0.2 | 0.341975 |
| TC0X00002977.mm.1 | NM_031868          | Ppp1ca  | protein phosphatase 1, catalytic subunit, alpha | 4192158   | 4195423   | TC1900000033.mm.1  | -0.2 | 0.342547 |
| TC0X00002979.mm.1 | NM_001159565       | Dctn3   | dynactin 3                                      | 41714798  | 41723170  | TC0400002477.mm.1  | 0.2  | 0.342549 |
| TC0X00002984.mm.1 | ENSMUST00000184513 | AL80802 | N/A                                             | 32173171  | 32173249  | TC0200000568.mm.1  | -0.1 | 0.342609 |
| TC0X00002985.mm.1 | ENSMUST00000157242 | Gm24443 | predicted gene, 24443                           | 25078772  | 25078903  | TC0600001950.mm.1  | -0.1 | 0.342656 |
| TC0X00002990.mm.1 | XM_621081          | Gm6604  | predicted gene 6604                             | 123581700 | 123602172 | TC0X00001208.mm.1  | -0.1 | 0.342776 |
| TC0X00002993.mm.1 | ENSMUST00000183666 | CDKN2B- | CDKN2B antisense RNA 1 intronic convserved rej  | 89445219  | 89445367  | TC0400000917.mm.1  | -0.1 | 0.342794 |
| TC0X00002995.mm.1 | ENSMUST00000112755 | Gm8334  | predicted gene 8334                             | 148613253 | 148615153 | TC0X00003150.mm.1  | -0.1 | 0.342835 |
| TC0X00002996.mm.1 | ENSMUST00000117036 | Gm24806 | predicted gene, 24806                           | 10517337  | 10517426  | TC0200000203.mm.1  | -0.1 | 0.342911 |
| TC0X00003001.mm.1 | NM_001099312       | Gm11569 | predicted gene 11569                            | 99803548  | 99804446  | TC1100003739.mm.1  | -0.1 | 0.343134 |
| TC0X00003009.mm.1 | OTTMUST00000007580 | RP23-35 | ---                                             | 115724326 | 115724808 | TC1100004088.mm.1  | -0.3 | 0.343158 |
| TC0X00003010.mm.1 | ENSMUST00000179033 | Gm24897 | predicted gene, 24897                           | 103898879 | 103898985 | TC0500001014.mm.1  | -0.5 | 0.343288 |
| TC0X00003011.mm.1 | ENSMUST00000083749 | Gm23731 | predicted gene, 23731                           | 102897960 | 102898066 | TC0200001525.mm.1  | -0.6 | 0.343331 |
| TC0X00003018.mm.1 | ENSMUST00000082916 | Gm23443 | predicted gene, 23443                           | 93545150  | 93545277  | TC0400003059.mm.1  | -0.2 | 0.343435 |
| TC0X00003021.mm.1 | NM_020498          | Ly6i    | lymphocyte antigen 6 complex, locus I           | 74979812  | 74983430  | TC1500001727.mm.1  | 0.1  | 0.343713 |
| TC0X00003022.mm.1 | ENSMUST00000175249 | Mir446q | microRNA 446q                                   | 28419943  | 28420018  | TC0300000177.mm.1  | 0.2  | 0.343753 |
| TC0X00003028.mm.1 | ENSMUST00000180915 | Gm7672  | predicted gene 7672                             | 22046114  | 22046986  | TC1000001848.mm.1  | 0.0  | 0.343782 |
| TC0X00003041.mm.1 | NM_001136087       | Slc6a18 | solute carrier family 6 (neurotransmitter trans | 73661750  | 73678023  | TC1300002302.mm.1  | 0.3  | 0.343852 |
| TC0X00003042.mm.1 | ENSMUST00000158827 | Gm24223 | predicted gene, 24223                           | 104700870 | 104700959 | TC0300001079.mm.1  | -0.1 | 0.344029 |
| TC0X00003044.mm.1 | NM_009044          | Rel     | reticuloendotheliosis oncogene                  | 23741514  | 23770970  | TC1100002374.mm.1  | -0.3 | 0.344113 |
| TC0X00003045.mm.1 | ENSMUST00000177893 | G530011 | ---                                             | 90754513  | 90754821  | TC0Y00000551.mm.1  | 0.1  | 0.344327 |
| TC0X00003053.mm.1 | ENSMUST00000179623 | G530011 | ---                                             | 90838869  | 90839177  | TC0Y00000552.mm.1  | 0.1  | 0.344327 |
| TC0X00003054.mm.1 | NM_007562          | Bnc1    | basonuclin 1                                    | 81966662  | 81992299  | TC0700003625.mm.1  | 0.1  | 0.344352 |
| TC0X00003062.mm.1 | ENSMUST00000049508 | Gm12231 | predicted gene 12231                            | 55118101  | 55118795  | TC1100002775.mm.1  | -0.2 | 0.34454  |
| TC0X00003063.mm.1 | ENSMUST00000104842 | Gm24684 | predicted gene, 24684                           | 46080888  | 46080983  | TC0800000527.mm.1  | 0.2  | 0.344566 |
| TC0X00003064.mm.1 | ENSMUST00000119479 | Gm11333 | predicted gene 11333                            | 23298049  | 23298196  | TC1300000238.mm.1  | 0.1  | 0.344671 |
| TC0X00003066.mm.1 | ENSMUST00000105167 | Gm9257  | predicted gene 9257                             | 19607629  | 19607264  | TC1200000169.mm.1  | 0.1  | 0.345278 |
| TC0X00003070.mm.1 | ENSMUST00000104651 | Gm22230 | predicted gene, 22230                           | 97007793  | 97007883  | TC1200002174.mm.1  | 0.2  | 0.345282 |
| TC0X00003080.mm.1 | NM_026143          | Far1    | fatty acyl CoA reductase 1                      | 113513834 | 113571511 | TC0700001666.mm.1  | -0.1 | 0.345384 |
| TC0X00003082.mm.1 | ENSMUST00000158811 | Gm23198 | predicted gene, 23198                           | 116675878 | 116675968 | TC1300001324.mm.1  | -0.1 | 0.345461 |
| TC0X00003093.mm.1 | NM_172776          | Slc22a2 | solute carrier family 22. member 29             | 8160165   | 8218900   | TC1900001767.mm.1  | 0.1  | 0.345521 |
| TC0X00003097.mm.1 | ENSMUST00000158925 | Gm24179 | predicted gene, 24179                           | 126840375 | 126840501 | TC1000003089.mm.1  | 0.1  | 0.345541 |
| TC0X00003101.mm.1 | NM_001168505       | Shoc2   | soc-2 (suppressor of clear) homolog (C. elegans | 53944306  | 54033278  | TC1900000766.mm.1  | 0.1  | 0.345751 |
| TC0X00003102.mm.1 | ENSMUST00000088514 | Magi2   | membrane associated guanylate kinase, WW an     | 20539890  | 20540404  | TC0500000161.mm.1  | 0.1  | 0.345775 |
| TC0X00003105.mm.1 | ENSMUST00000103301 | Gm20730 | predicted gene, 20730                           | 43081515  | 43082097  | TC0600002183.mm.1  | -0.3 | 0.345984 |
| TC0X00003106.mm.1 | NM_023184          | Klf15   | Kruppel-like factor 15                          | 90462576  | 90475238  | TC0600001074.mm.1  | 0.1  | 0.346068 |
| TC0X00003112.mm.1 | NR_037248          | Mir4660 | microRNA 4660                                   | 70308505  | 70669399  | TC1200000586.mm.1  | 0.2  | 0.34624  |
| TC0X00003113.mm.1 | ENSMUST00000101814 | Gm25414 | predicted gene, 25414                           | 14506587  | 14506693  | TC1200000115.mm.1  | -0.4 | 0.346821 |
| TC0X00003120.mm.1 | NM_025593          | Polr2l  | polymerase (RNA) II (DNA directed) polypeptide  | 141471860 | 141475153 | TC0700004542.mm.1  | -0.1 | 0.347178 |
| TC0X00003122.mm.1 | NM_026442          | Cmc1    | COX assembly mitochondrial protein 1            | 118064522 | 118150196 | TC0900003220.mm.1  | 0.1  | 0.347202 |
| TC0X00003125.mm.1 | ENSMUST00000178907 | Gm21834 | predicted gene, 21834                           | 57741767  | 57742219  | TC1700002356.mm.1  | -0.1 | 0.347326 |
| TC0X00003131.mm.1 | NM_001040396       | 2810407 | RIKEN cDNA 2810407C02 gene                      | 58576636  | 58593546  | TC0300000459.mm.1  | -0.1 | 0.347374 |
| TC0X00003135.mm.1 | NM_177396          | Ifnl3   | interferon lambda 3                             | 28522835  | 28524322  | TC0700000504.mm.1  | -0.1 | 0.347429 |
| TC0X00003139.mm.1 | ENSMUST00000073111 | Gm10061 | predicted gene 10061                            | 89151139  | 89151303  | TC1600000972.mm.1  | -0.2 | 0.347725 |
| TC0X00003143.mm.1 | NM_007911          | Efnb3   | efhrin B3                                       | 69554092  | 69560237  | TC1100003046.mm.1  | 0.1  | 0.347864 |
| TC0X00003145.mm.1 | NM_013895          | Timm13  | translocase of inner mitochondrial membrane 1:  | 80899450  | 80900969  | TC1000002518.mm.1  | -0.1 | 0.347988 |
| TC0X00003147.mm.1 | ENSMUST00000158758 | Gm24676 | predicted gene, 24676                           | 130081419 | 130081493 | TC0600001543.mm.1  | 0.1  | 0.348061 |
| TC0X00003150.mm.1 | NM_146135          | Pias3   | protein inhibitor of activated STAT 3           | 96696375  | 96706070  | TC0300000956.mm.1  | 0.0  | 0.348094 |
| TC0X00003156.mm.1 | NR_030688          | Gm6402  | ribosomal protein S17 pseudogene                | 30394825  | 30396180  | TC1700001802.mm.1  | -0.1 | 0.348137 |
| TC0X00003168.mm.1 | NM_020047          | Tacstd2 | tumor-associated calcium signal transducer 2    | 67534059  | 67535822  | TC0600002427.mm.1  | 0.1  | 0.348217 |
| TC0X00003169.mm.1 | NM_011415          | SnaI2   | snail homolog 2 (Drosophila)                    | 14705852  | 14709395  | TC1600000184.mm.1  | 0.1  | 0.348264 |
| TC0X00003176.mm.1 | ENSMUST00000118302 | Gm6733  | predicted gene 6733                             | 72833461  | 72833580  | TC1100001007.mm.1  | 0.1  | 0.348349 |
| TC0X00003177.mm.1 | ENSMUST00000166899 | Gm17316 | predicted gene, 17316                           | 137671524 | 137672540 | TC0300001395.mm.1  | 0.5  | 0.348566 |
| TC0X00003179.mm.1 | NM_183257          | Hamp2   | hepcidin antimicrobial peptide 2                | 30922372  | 30924181  | TC0700002781.mm.1  | -0.1 | 0.348625 |
| TC0X00003180.mm.1 | NR_027857          | Nkx6-2  | NK6 homeobox 2                                  | 139579376 | 139582797 | TC0700004481.mm.1  | -0.1 | 0.349127 |
| TC0X00003181.mm.1 | ENSMUST00000104173 | Gm23481 | predicted gene, 23481                           | 46658508  | 46658638  | TC1000002116.mm.1  | 0.1  | 0.349271 |
| TC0X00003182.mm.1 | XR_105528          | Gm19865 | predicted gene, 19865                           | 35543902  | 35545484  | TC1300000404.mm.1  | 0.1  | 0.349307 |
| TC0X00003186.mm.1 | ENSMUST00000184654 | Gm14214 | predicted gene 14214                            | 154769255 | 154770030 | TC0200004949.mm.1  | -0.1 | 0.349347 |
| TC0X00003187.mm.1 | ENSMUST00000157594 | Gm22077 | predicted gene, 22077                           | 80080251  | 80080343  | TC1500001898.mm.1  | -0.1 | 0.349433 |

|                   |                    |         |                                                 |           |           |                    |      |          |
|-------------------|--------------------|---------|-------------------------------------------------|-----------|-----------|--------------------|------|----------|
| TC0X00003200.mm.1 | ENSMUST00000122042 | Gm4996  | predicted gene 4996                             | 146932685 | 146934254 | TC0X00001446.mm.1  | -0.2 | 0.349761 |
| TC0X00003201.mm.1 | ENSMUST00000121815 | Gm12725 | predicted gene 12725                            | 106136111 | 106137778 | TC0400003196.mm.1  | 0.3  | 0.349785 |
| TC0X00003202.mm.1 | ENSMUST00000083369 | Gm23249 | predicted gene, 23249                           | 93746502  | 93746662  | TC1200000947.mm.1  | 0.1  | 0.350184 |
| TC0X00003205.mm.1 | ENSMUST00000103978 | Gm24120 | predicted gene, 24120                           | 69957776  | 69957904  | TC0700003473.mm.1  | 0.1  | 0.350309 |
| TC0X00003206.mm.1 | ENSMUST00000103842 | Gm23931 | predicted gene, 23931                           | 13604999  | 13605107  | TC1900001185.mm.1  | 0.1  | 0.350365 |
| TC0X00003208.mm.1 | NM_023733          | Crot    | carnitine O-octanoyltransferase                 | 8966033   | 8997427   | TC0500001936.mm.1  | 0.1  | 0.350447 |
| TC0X00003231.mm.1 | ENSMUST00000084598 | Gm10155 | predicted gene 10155                            | 126299434 | 126299916 | TC0700004269.mm.1  | -0.3 | 0.35058  |
| TC0X00003234.mm.1 | NM_001077410       | Gimap8  | GTPase, IMAP family member 8                    | 48647234  | 48660875  | TC0600000564.mm.1  | -0.2 | 0.350689 |
| TC0X00003239.mm.1 | ENSMUST00000158091 | Gm22724 | predicted gene, 22724                           | 123736886 | 123737012 | TC0600003091.mm.1  | -0.1 | 0.350725 |
| TC0X00003243.mm.1 | NM_134149          | Al83718 | expressed sequence Al837181                     | 5425144   | 5427317   | TC1900000065.mm.1  | -0.1 | 0.35074  |
| TC0X00003245.mm.1 | NM_025811          | Nhlrc2  | NHL repeat containing 2                         | 56548261  | 56598846  | TC1900000801.mm.1  | -0.1 | 0.350784 |
| TC0X00003247.mm.1 | NM_027016          | Sec62   | SEC62 homolog (S. cerevisiae)                   | 30792876  | 30821263  | TC0300000203.mm.1  | -0.1 | 0.350838 |
| TC0X00003248.mm.1 | ENSMUST00000178972 | Gm25312 | predicted gene, 25312                           | 178028033 | 178028139 | TC0100003641.mm.1  | -0.6 | 0.350959 |
| TC0X00003251.mm.1 | NM_146939          | Olfr354 | olfactory receptor 354                          | 36906911  | 36907994  | TC0200000673.mm.1  | 0.1  | 0.35134  |
| TC0X00003254.mm.1 | NM_001190800       | Ddx19b  | DEAD (Asp-Glu-Ala-Asp) box polypeptide 19b      | 111003186 | 111031751 | TC0800002935.mm.1  | -0.1 | 0.351416 |
| TC0X00003267.mm.1 | NM_146972          | Olfr123 | olfactory receptor 1233                         | 89339307  | 89340348  | TC0200004054.mm.1  | 0.1  | 0.351575 |
| TC0X00003283.mm.1 | ENSMUST00000158409 | Gm22156 | predicted gene, 22156                           | 12676933  | 12677073  | TC1100000140.mm.1  | 0.1  | 0.351591 |
| TC0X00003312.mm.1 | ENSMUST00000170703 | Gm3571  | predicted gene 3571                             | 93778611  | 93779772  | TC1000001141.mm.1  | -0.1 | 0.351618 |
| TC0X00003313.mm.1 | ENSMUST00000119742 | Gm15029 | predicted gene 15029                            | 20911596  | 20911794  | TC0X00000219.mm.1  | -0.1 | 0.351692 |
| TC0X00003314.mm.1 | NM_205820          | Tlr13   | toll-like receptor 13                           | 106143204 | 106160493 | TC0X00001069.mm.1  | 0.2  | 0.351821 |
| TC0X00003315.mm.1 | NM_001025241       | Gm20747 | predicted gene, 20747                           | 53415957  | 53418307  | TC0Y00000374.mm.1  | 0.1  | 0.352614 |
| TC0X00003316.mm.1 | ENSMUST00000157964 | Gm22961 | predicted gene, 22961                           | 138587624 | 138587729 | TC0400003827.mm.1  | 0.1  | 0.352979 |
| TC0X00003318.mm.1 | NM_175150          | Txndc15 | thioredoxin domain containing 15                | 55714650  | 55726228  | TC1300000674.mm.1  | 0.2  | 0.353098 |
| TC0X00003333.mm.1 | NM_020626          | Tmem27  | transmembrane protein 27                        | 164088830 | 164118860 | TC0X00001661.mm.1  | 0.5  | 0.353263 |
| TC0X00003337.mm.1 | ENSMUST00000120233 | Vcp-rs  | valosin containing protein, related sequence    | 104345829 | 104348234 | TC0X00002798.mm.1  | -0.2 | 0.353324 |
| TC0X00003345.mm.1 | NM_001145978       | Parp4   | poly (ADP-ribose) polymerase family, member 4   | 56575619  | 56659798  | TC1400000808.mm.1  | 0.1  | 0.353417 |
| TC0X00003346.mm.1 | ENSMUST00000117002 | Gm22051 | predicted gene, 22051                           | 10506555  | 10506681  | TC0200000179.mm.1  | -0.1 | 0.35349  |
| TC0X00003349.mm.1 | NM_177397          | Atp6v1g | ATPase, H+ transporting, lysosomal V1 subunit G | 138273738 | 138289462 | TC0100001292.mm.1  | 0.1  | 0.35363  |
| TC0X00003358.mm.1 | NM_001185002       | Rhox13  | reproductive homeobox 13                        | 38120840  | 38129966  | TC0X00000361.mm.1  | -0.1 | 0.353809 |
| TC0X00003361.mm.1 | NR_030702          | Snord4a | small nucleolar RNA, C/D box 4A                 | 78181686  | 78181756  | TC1100003290.mm.1  | -0.3 | 0.353897 |
| TC0X00003362.mm.1 | ENSMUST00000083037 | Gm26054 | predicted gene, 26054                           | 116952589 | 116952695 | TC0700004163.mm.1  | -0.5 | 0.353948 |
| TC0X00003376.mm.1 | ENSMUST00000083272 | Gm24611 | predicted gene, 24611                           | 42337677  | 42337767  | TC06000002168.mm.1 | -0.1 | 0.354006 |
| TC0X00003377.mm.1 | NM_010860          | Myl6    | myosin, light polypeptide 6, alkali, smooth mus | 128490860 | 128493875 | TC1000003145.mm.1  | 0.1  | 0.35416  |
| TC0X00003380.mm.1 | XR_001846          | 1700049 | RIKEN cDNA 1700049E17 gene, gene 1              | 41924949  | 41933037  | TC1400000420.mm.1  | -0.1 | 0.354196 |
| TC0X00003382.mm.1 | NM_178603          | Mrpl50  | mitochondrial ribosomal protein L50             | 49512596  | 49521093  | TC0400002637.mm.1  | 0.1  | 0.354438 |
| TC0X00003383.mm.1 | NM_178308          | Scgb2b2 | secretoglobulin, family 2B, member 26           | 33942997  | 33945040  | TC07000002820.mm.1 | -0.1 | 0.354791 |
| TC0X00003388.mm.1 | NM_009277          | Trim21  | tripartite motif-containing 21                  | 102557920 | 102565482 | TC0700003862.mm.1  | -0.1 | 0.354804 |
| TC0X00003389.mm.1 | NM_153571          | Hscb    | HscB iron-sulfur cluster co-chaperone homolog ( | 110829070 | 110839777 | TC0500003001.mm.1  | -0.1 | 0.354842 |
| TC0X00003391.mm.1 | ENSMUST00000164067 | Cby3    | chibby homolog 3 (Drosophila)                   | 50354462  | 50359699  | TC1100000543.mm.1  | -0.1 | 0.355012 |
| TC0X00003400.mm.1 | NM_001099333       | Gm2863  | predicted gene 2863                             | 33313338  | 33315288  | TC0X00000289.mm.1  | -0.1 | 0.355186 |
| TC0X00003412.mm.1 | NM_021325          | Cd200r1 | CD200 receptor 1                                | 44794978  | 44794978  | TC1600000662.mm.1  | 0.1  | 0.35527  |
| TC0X00003419.mm.1 | NM_177723          | Vsig8   | V-set and immunoglobulin domain containing 8    | 172555938 | 172563717 | TC0100001621.mm.1  | 0.1  | 0.355295 |
| TC0X00003425.mm.1 | NM_177353          | Slc9a7  | solute carrier family 9 (sodium/hydrogen exchan | 20105755  | 20291807  | TC0X00001922.mm.1  | -0.2 | 0.355365 |
| TC0X00003426.mm.1 | NM_011051          | Pdcd6   | programmed cell death 6                         | 74303121  | 74317326  | TC1300002316.mm.1  | -0.1 | 0.355456 |
| TC0X00003433.mm.1 | NM_008777          | Pah     | phenylalanine hydroxylase                       | 87521795  | 87584137  | TC1000001063.mm.1  | 0.5  | 0.355532 |
| TC0X00003435.mm.1 | NM_146616          | Olfr305 | olfactory receptor 305                          | 86363376  | 86364335  | TC0700003693.mm.1  | -0.1 | 0.355757 |
| TC0X00003436.mm.1 | ENSMUST00000157223 | Gm25621 | predicted gene, 25621                           | 69685467  | 69685580  | TC0300000585.mm.1  | 0.1  | 0.355981 |
| TC0X00003438.mm.1 | ENSMUST00000104277 | Gm26423 | predicted gene, 26423                           | 89158999  | 89159126  | TC0900001145.mm.1  | -0.1 | 0.356013 |
| TC0Y00000005.mm.1 | NM_009153          | Sema3b  | sema domain, immunoglobulin domain (Ig), shor   | 107597674 | 107609241 | TC0900003037.mm.1  | 0.0  | 0.356331 |
| TC0Y00000018.mm.1 | ENSMUST00000082811 | Gm24708 | predicted gene, 24708                           | 16624575  | 16624677  | TC0700002433.mm.1  | -0.2 | 0.356342 |
| TC0Y00000020.mm.1 | NR_029769          | Mir340  | microRNA 340                                    | 50069702  | 50069799  | TC1100000534.mm.1  | 0.1  | 0.356643 |
| TC0Y00000024.mm.1 | ENSMUST00000122650 | n-R5s70 | nuclear encoded rRNA 5S 70                      | 72281016  | 72281131  | TC1100000988.mm.1  | 0.1  | 0.357209 |
| TC0Y00000036.mm.1 | NM_001128609       | Dedd    | death effector domain-containing                | 171329145 | 171342501 | TC0100001585.mm.1  | 0.0  | 0.357331 |
| TC0Y00000051.mm.1 | ENSMUST00000174949 | Gm22655 | predicted gene, 22655                           | 101881184 | 101881279 | TC0700001441.mm.1  | -0.2 | 0.35751  |
| TC0Y00000055.mm.1 | NM_001029938       | Rilp    | Rab interacting lysosomal protein               | 75510094  | 75513168  | TC1100001070.mm.1  | 0.0  | 0.357551 |
| TC0Y00000062.mm.1 | NM_001012310       | Slc25a4 | solute carrier family 25, member 47             | 108851129 | 108856815 | TC1200001118.mm.1  | -0.1 | 0.35759  |
| TC0Y00000064.mm.1 | ENSMUST00000082596 | Gm23613 | predicted gene, 23613                           | 36776619  | 36776705  | TC0X00000326.mm.1  | 0.1  | 0.357706 |
| TC0Y00000067.mm.1 | ENSMUST00000116939 | Gm23368 | predicted gene, 23368                           | 30100840  | 30100935  | TC0700002742.mm.1  | -0.3 | 0.358015 |
| TC0Y00000069.mm.1 | ENSMUST00000177876 | Gm23725 | predicted gene, 23725                           | 157237225 | 157237331 | TC0300003190.mm.1  | -0.3 | 0.358367 |
| TC0Y00000072.mm.1 | ENSMUST00000174960 | Gm24515 | predicted gene, 24515                           | 129684133 | 129684241 | TC0300002933.mm.1  | 0.2  | 0.358474 |
| TC0Y00000073.mm.1 | ENSMUST00000179376 | Gm22618 | predicted gene, 22618                           | 50290380  | 50290486  | TC0500002389.mm.1  | -0.6 | 0.358574 |
| TC0Y00000074.mm.1 | ENSMUST00000120151 | Gm14782 | predicted gene 14782                            | 91859498  | 91859692  | TC0X00002616.mm.1  | -0.1 | 0.358728 |
| TC0Y00000075.mm.1 | NM_009285          | Stc1    | stanniocalcin 1                                 | 69029279  | 69041401  | TC1400000968.mm.1  | -0.1 | 0.358916 |
| TC0Y00000077.mm.1 | NCBI_Gene:668469:p | Ighv1-5 | immunoglobulin heavy variable V1-5              | 114513330 | 114513623 | TC1200002601.mm.1  | -0.7 | 0.358941 |
| TC0Y00000078.mm.1 | ENSMUST00000082651 | Gm25129 | predicted gene, 25129                           | 158379534 | 158379666 | TC0200002428.mm.1  | 0.1  | 0.358999 |
| TC0Y00000080.mm.1 | ENSMUST00000083083 | Gm23510 | predicted gene, 23510                           | 97572076  | 97572238  | TC0600002807.mm.1  | -0.3 | 0.359002 |
| TC0Y00000082.mm.1 | ENSMUST00000158612 | Gm22206 | predicted gene, 22206                           | 153708911 | 153709026 | TC0300001544.mm.1  | 0.1  | 0.359083 |
| TC0Y00000083.mm.1 | NM_133839          | Mmadhc  | methylmalonic aciduria (cobalamin deficiency) c | 50279881  | 50296801  | TC0200003505.mm.1  | -0.1 | 0.359098 |
| TC0Y00000084.mm.1 | ENSMUST00000170790 | Gm10340 | predicted gene 10340                            | 3133997   | 3141609   | TC1400002781.mm.1  | 0.1  | 0.359301 |
| TC0Y00000086.mm.1 | NM_008163          | Grb2    | growth factor receptor bound protein 2          | 115644045 | 115708597 | TC1100004084.mm.1  | -0.1 | 0.359314 |
| TC0Y00000107.mm.1 | ENSMUST00000183481 | RP23-34 | N/A                                             | 14893847  | 14894231  | TC0700002394.mm.1  | 0.0  | 0.359376 |
| TC0Y00000108.mm.1 | NM_001009547       | Adam26b | a disintegrin and metallopeptidase domain 26B   | 43519864  | 43528137  | TC0800002131.mm.1  | -0.1 | 0.359398 |
| TC0Y00000109.mm.1 | NM_024284          | Hagh    | hydroxyacyl glutathione hydrolase               | 24840143  | 24864450  | TC1700000354.mm.1  | 0.1  | 0.359679 |
| TC0Y00000110.mm.1 | XM_990209          | Gm14757 | predicted gene 14757                            | 74677268  | 74678045  | TC0X00002458.mm.1  | 0.1  | 0.359761 |
| TC0Y00000111.mm.1 | ENSMUST00000104285 | Gm24790 | predicted gene, 24790                           | 5189803   | 5189934   | TC1300001384.mm.1  | 0.1  | 0.359786 |
| TC0Y00000114.mm.1 | NM_001081133       | Kif16b  | kinesin family member 16B                       | 142617474 | 142901531 | TC0200004737.mm.1  | -0.1 | 0.359891 |
| TC0Y00000117.mm.1 | NM_029115          | Ccdc181 | coiled-coil domain containing 181               | 164275585 | 164287847 | TC0100001501.mm.1  | -0.1 | 0.360037 |
| TC0Y00000118.mm.1 | NM_025857          | Aagab   | alpha- and gamma-adaptin binding protein        | 63602655  | 63641893  | TC0900000804.mm.1  | -0.1 | 0.360045 |

|                   |                    |         |                                                 |           |           |                   |      |          |
|-------------------|--------------------|---------|-------------------------------------------------|-----------|-----------|-------------------|------|----------|
| TC0Y00000119.mm.1 | ENSMUST00000104480 | Gm26143 | predicted gene, 26143                           | 142424795 | 142424902 | TC0700002074.mm.1 | 0.1  | 0.360196 |
| TC0Y00000124.mm.1 | NM_027198          | Zswim7  | zinc finger SWIM-type containing 7              | 62267224  | 62281395  | TC1100002932.mm.1 | 0.1  | 0.360673 |
| TC0Y00000126.mm.1 | ENSMUST00000179697 | Gm24464 | predicted gene, 24464                           | 18745103  | 18745209  | TC0700002459.mm.1 | -0.4 | 0.360693 |
| TC0Y00000130.mm.1 | XM_001478153       | Gm15210 | predicted gene 15210                            | 100030487 | 100032156 | TC0800001164.mm.1 | -0.1 | 0.3609   |
| TC0Y00000131.mm.1 | NM_203319          | Dhx37   | DEAH (Asp-Glu-Ala-His) box polypeptide 37       | 125414403 | 125434066 | TC0500003274.mm.1 | -0.1 | 0.361066 |
| TC0Y00000132.mm.1 | NM_172624          | Dpp9    | dipeptidylpeptidase 9                           | 56186682  | 56218889  | TC1700002318.mm.1 | -0.1 | 0.361073 |
| TC0Y00000133.mm.1 | NR_035464          | Mir1943 | microRNA 1943                                   | 79375228  | 79375300  | TC1500001871.mm.1 | -0.1 | 0.361107 |
| TC0Y00000142.mm.1 | NM_001146198       | Nkx2-1  | NK2 homeobox 1                                  | 56531935  | 56536908  | TC1200001791.mm.1 | -0.1 | 0.361121 |
| TC0Y00000148.mm.1 | ENSMUST00000178586 | Gm22887 | predicted gene, 22887                           | 22534737  | 22534843  | TC0500002038.mm.1 | 0.1  | 0.361164 |
| TC0Y00000156.mm.1 | XR_140591          | Gm19816 | predicted gene, 19816                           | 60577699  | 60581360  | TC0300000487.mm.1 | -0.2 | 0.361176 |
| TC0Y00000162.mm.1 | ENSMUST00000131638 | Gm5970  | predicted gene 5970                             | 60220843  | 60222058  | TC1800000607.mm.1 | 0.1  | 0.361222 |
| TC0Y00000169.mm.1 | XR_105475          | Gm4983  | predicted gene 4983                             | 17992855  | 18065610  | TC1200000152.mm.1 | 0.0  | 0.361242 |
| TC0Y00000173.mm.1 | ENSMUST00000101821 | Gm25524 | predicted gene, 25524                           | 74212813  | 74212919  | TC0100000623.mm.1 | 0.1  | 0.361246 |
| TC0Y00000181.mm.1 | NM_016681          | Chek2   | checkpoint kinase 2                             | 110840009 | 110874133 | TC0500001152.mm.1 | -0.1 | 0.361252 |
| TC0Y00000182.mm.1 | NM_025546          | Rsl1d1  | ribosomal L1 domain containing 1                | 11192970  | 11203331  | TC1600001213.mm.1 | -0.2 | 0.3613   |
| TC0Y00000184.mm.1 | ENSMUST00000082402 | COX1    | cytochrome c oxidase subunit I                  | 5327      | 6938      | TC0M00000006.mm.1 | 0.1  | 0.361346 |
| TC0Y00000185.mm.1 | ENSMUST00000104389 | Gm24890 | predicted gene, 24890                           | 70428496  | 70428597  | TC1400002339.mm.1 | -0.3 | 0.361401 |
| TC0Y00000186.mm.1 | ENSMUST00000157470 | Gm23669 | predicted gene, 23669                           | 118299990 | 118300117 | TC1400001281.mm.1 | -0.1 | 0.361413 |
| TC0Y00000187.mm.1 | ENSMUST00000098624 | Gm9387  | predicted pseudogene 9387                       | 128953782 | 128955098 | TC0300002923.mm.1 | -0.1 | 0.361526 |
| TC0Y00000200.mm.1 | NM_022997          | Vps35   | vacuolar protein sorting 35                     | 85260392  | 85299513  | TC0800002608.mm.1 | 0.1  | 0.361593 |
| TC0Y00000205.mm.1 | NM_024253          | Nkg7    | natural killer cell group 7 sequence            | 43437073  | 43438249  | TC0700000759.mm.1 | -0.1 | 0.36177  |
| TC0Y00000212.mm.1 | ENSMUST00000178053 | Gm24926 | predicted gene, 24926                           | 59477493  | 59477571  | TC0700003198.mm.1 | -0.1 | 0.361814 |
| TC0Y00000223.mm.1 | ENSMUST00000178266 | Gm22632 | predicted gene, 22632                           | 59481219  | 59481297  | TC0700003200.mm.1 | -0.1 | 0.361814 |
| TC0Y00000224.mm.1 | NM_146249          | Zfp119b | zinc finger protein 119b                        | 55938373  | 55949500  | TC1700002306.mm.1 | 0.0  | 0.361846 |
| TC0Y00000225.mm.1 | NM_007527          | Bax     | BCL2-associated X protein                       | 45461695  | 45466898  | TC0700003007.mm.1 | 0.0  | 0.361963 |
| TC0Y00000226.mm.1 | NM_173052          | Serpinb | serine (or cysteine) peptidase inhibitor, clade | 33084103  | 33094380  | TC1300000366.mm.1 | 0.0  | 0.362133 |
| TC0Y00000230.mm.1 | XM_889816          | Gm6415  | predicted pseudogene 6415                       | 81161393  | 81164003  | TC0700003604.mm.1 | -0.1 | 0.362152 |
| TC0Y00000237.mm.1 | NM_001166744       | Vmn1r11 | vomeronasal 1 receptor 116                      | 20872256  | 20873179  | TC0700000325.mm.1 | 0.1  | 0.362527 |
| TC0Y00000239.mm.1 | ENSMUST00000182020 | Gm7481  | predicted gene 7481                             | 49840757  | 49841751  | TC1200001702.mm.1 | -0.1 | 0.362583 |
| TC0Y00000240.mm.1 | ENSMUST00000098994 | LOC1005 | 60S ribosomal protein L29-like // predicted ge  | 7751672   | 7752325   | TC0900000054.mm.1 | -0.4 | 0.362588 |
| TC0Y00000264.mm.1 | ENSMUST00000157133 | Gm23466 | predicted gene, 23466                           | 34434296  | 34434401  | TC0400000300.mm.1 | 0.1  | 0.362674 |
| TC0Y00000266.mm.1 | NM_001097621       | Kif26a  | kinesin family member 26A                       | 112146208 | 112181747 | TC1200001257.mm.1 | 0.0  | 0.362734 |
| TC0Y00000274.mm.1 | NM_027873          | Ubiad1  | UbiA prenyltransferase domain containing 1      | 148434495 | 148444771 | TC0400004021.mm.1 | 0.0  | 0.362776 |
| TC0Y00000277.mm.1 | NM_008244          | Hgs     | HGF-regulated tyrosine kinase substrate         | 120467635 | 120483984 | TC1100002028.mm.1 | 0.1  | 0.362958 |
| TC0Y00000287.mm.1 | ENSMUST00000083891 | Gm26314 | predicted gene, 26314                           | 11850484  | 11850590  | TC0X00000146.mm.1 | -0.3 | 0.362978 |
| TC0Y00000292.mm.1 | NCBI_Gene:628398:p | Ighv6-4 | immunoglobulin heavy variable V6-4              | 114406474 | 114406773 | TC1200002474.mm.1 | -0.1 | 0.362986 |
| TC0Y00000293.mm.1 | ENSMUST00000104784 | Gm26376 | predicted gene, 26376                           | 40051904  | 40052133  | TC1700000810.mm.1 | -0.1 | 0.362998 |
| TC0Y00000319.mm.1 | NM_013752          | Nbn     | nibrin                                          | 15957925  | 15992589  | TC0400000140.mm.1 | -0.1 | 0.363045 |
| TC0Y00000326.mm.1 | NM_016710          | Hmgn5   | high-mobility group nucleosome binding domain   | 109004534 | 109013404 | TC0X00002853.mm.1 | -0.2 | 0.363128 |
| TC0Y00000351.mm.1 | NM_009921          | Camp    | cathelicidin antimicrobial peptide              | 109847375 | 109849456 | TC0900003098.mm.1 | 0.0  | 0.363129 |
| TC0Y00000359.mm.1 | ENSMUST00000083357 | Gm26125 | predicted gene, 26125                           | 74534285  | 74534391  | TC0X00000718.mm.1 | -0.5 | 0.363164 |
| TC0Y00000362.mm.1 | ENSMUST00000104610 | Gm23803 | predicted gene, 23803                           | 59817666  | 59817797  | TC1000002220.mm.1 | 0.2  | 0.363174 |
| TC0Y00000363.mm.1 | NM_175352          | Unc119b | unc-119 homolog B (C. elegans)                  | 115122550 | 115134975 | TC0500003089.mm.1 | -0.1 | 0.363543 |
| TC0Y00000365.mm.1 | XM_001477101       | Gm3476  | predicted gene 3476                             | 6117368   | 6172001   | TC1400001407.mm.1 | 0.1  | 0.363627 |
| TC0Y00000370.mm.1 | NM_027895          | Ulk3    | unc-51-like kinase 3                            | 57589452  | 57596233  | TC0900000711.mm.1 | 0.0  | 0.363701 |
| TC0Y00000371.mm.1 | NM_177298          | Pisd    | phosphatidylserine decarboxylase                | 32736301  | 32785646  | TC0500003725.mm.1 | 0.1  | 0.363766 |
| TC0Y00000374.mm.1 | XM_001473616       | Gm2444  | predicted gene 2444                             | 12259448  | 12260839  | TC1300001446.mm.1 | 0.2  | 0.363779 |
| TC0Y00000377.mm.1 | ENSMUST00000116811 | Gm22488 | predicted gene, 22488                           | 58146616  | 58146742  | TC1500000410.mm.1 | -0.6 | 0.363826 |
| TC0Y00000381.mm.1 | NM_175305          | Lrrc19  | leucine rich repeat containing 19               | 94636653  | 94650144  | TC0400003074.mm.1 | 0.3  | 0.364104 |
| TC0Y00000382.mm.1 | NM_010489          | Hyal2   | hyaluronoglucosaminidase 2                      | 107569117 | 107572778 | TC0900001375.mm.1 | 0.1  | 0.36413  |
| TC0Y00000384.mm.1 | NM_013860          | Limd1   | LIM domains containing 1                        | 123478701 | 123521552 | TC0900001665.mm.1 | -0.1 | 0.364376 |
| TC0Y00000386.mm.1 | ENSMUST00000104071 | Gm23979 | predicted gene, 23979                           | 9643690   | 9643817   | TC1200001409.mm.1 | -0.1 | 0.364476 |
| TC0Y00000390.mm.1 | ENSMUST00000177597 | Gm24418 | predicted gene, 24418                           | 59438019  | 59438097  | TC0700003177.mm.1 | 0.1  | 0.364506 |
| TC0Y00000391.mm.1 | ENSMUST00000178518 | Gm24639 | predicted gene, 24639                           | 59443631  | 59443709  | TC0700003180.mm.1 | 0.1  | 0.364506 |
| TC0Y00000394.mm.1 | ENSMUST00000179082 | Gm23076 | predicted gene, 23076                           | 59449243  | 59449321  | TC0700003183.mm.1 | 0.1  | 0.364506 |
| TC0Y00000410.mm.1 | ENSMUST00000179157 | Gm25077 | predicted gene, 25077                           | 59473776  | 59473854  | TC0700003196.mm.1 | 0.1  | 0.364506 |
| TC0Y00000411.mm.1 | ENSMUST00000122085 | Gm15593 | predicted gene 15593                            | 18144734  | 18145741  | TC0600000144.mm.1 | -0.1 | 0.364787 |
| TC0Y00000413.mm.1 | ENSMUST00000157941 | Gm23783 | predicted gene, 23783                           | 128734202 | 128734303 | TC0700001892.mm.1 | 0.2  | 0.36493  |
| TC0Y00000415.mm.1 | NM_133737          | Lancl2  | LanC (bacterial lantibiotic synthetase componen | 57702455  | 57739449  | TC0600000698.mm.1 | -0.1 | 0.365084 |
| TC0Y00000421.mm.1 | ENSMUST00000157960 | Gm22963 | predicted gene, 22963                           | 10921670  | 10921760  | TC0100000054.mm.1 | 0.1  | 0.365215 |
| TC0Y00000422.mm.1 | NM_029554          | 610040  | RIKEN cDNA 0610040J01 gene                      | 63812495  | 63899621  | TC0500000584.mm.1 | -0.1 | 0.365314 |
| TC0Y00000424.mm.1 | ENSMUST00000119293 | Gm16056 | predicted gene 16056                            | 26859967  | 26860101  | TC0500002126.mm.1 | 0.2  | 0.365347 |
| TC0Y00000429.mm.1 | NR_039586          | Mir5125 | microRNA 5125                                   | 23823291  | 23823369  | TC1700000324.mm.1 | 0.2  | 0.365455 |
| TC0Y00000430.mm.1 | NM_001081265       | Heatr2  | HEAT repeat containing 2                        | 139150223 | 139186510 | TC0500001667.mm.1 | 0.2  | 0.365607 |
| TC0Y00000439.mm.1 | ENSMUST00000122505 | Gm24592 | predicted gene, 24592                           | 120381034 | 120381139 | TC0600003040.mm.1 | -0.6 | 0.365772 |
| TC0Y00000440.mm.1 | ENSMUST00000083352 | Gm23727 | predicted gene, 23727                           | 78911167  | 78911330  | TC0600000880.mm.1 | 0.1  | 0.365858 |
| TC0Y00000441.mm.1 | NM_172796          | Sifn9   | schlafen 9                                      | 82979629  | 82991830  | TC1100003379.mm.1 | -0.1 | 0.365862 |
| TC0Y00000450.mm.1 | ENSMUST00000104589 | Gm22372 | predicted gene, 22372                           | 106426712 | 106426847 | TC0700001563.mm.1 | 0.1  | 0.365866 |
| TC0Y00000456.mm.1 | NM_019875          | Abcb9   | ATP-binding cassette, sub-family B (MDR/TAP), n | 124061530 | 124095798 | TC0500003247.mm.1 | 0.0  | 0.365901 |
| TC0Y00000457.mm.1 | ENSMUST00000139695 | Gm14798 | predicted gene 14798                            | 94028854  | 94099304  | TC0X00000892.mm.1 | -0.1 | 0.365926 |
| TC0Y00000463.mm.1 | ENSMUST00000116110 | Gm11799 | predicted gene 11799                            | 8166894   | 8167353   | TC0400002175.mm.1 | -0.1 | 0.366185 |
| TC0Y00000464.mm.1 | ENSMUST00000104529 | Gm25726 | predicted gene, 25726                           | 57859820  | 57859948  | TC0600002356.mm.1 | 0.1  | 0.366246 |
| TC0Y00000465.mm.1 | NM_008233          | Hdgfrp2 | hepatoma-derived growth factor, related protei  | 56079657  | 56100598  | TC1700000998.mm.1 | -0.1 | 0.366319 |
| TC0Y00000467.mm.1 | NM_011680          | Usf2    | upstream transcription factor 2                 | 30945248  | 30956803  | TC0700002784.mm.1 | -0.1 | 0.366581 |
| TC0Y00000469.mm.1 | NM_133683          | Tmem19  | transmembrane protein 19                        | 115339674 | 115362262 | TC1000002900.mm.1 | 0.1  | 0.366675 |
| TC0Y00000470.mm.1 | NM_172402          | Slc25a3 | solute carrier family 25, member 32             | 39094191  | 39112716  | TC1500001424.mm.1 | -0.1 | 0.366944 |
| TC0Y00000473.mm.1 | ENSMUST00000083798 | Gm24492 | predicted gene, 24492                           | 84287641  | 84287747  | TC1700002649.mm.1 | -0.5 | 0.366985 |
| TC0Y00000476.mm.1 | ENSMUST00000157810 | Gm25383 | predicted gene, 25383                           | 79161719  | 79161862  | TC1300000954.mm.1 | -0.1 | 0.367126 |

|                   |                    |         |                                                 |           |           |                   |      |          |
|-------------------|--------------------|---------|-------------------------------------------------|-----------|-----------|-------------------|------|----------|
| TC0Y00000477.mm.1 | NM_001079690       | Slc12a1 | solute carrier family 12, member 1              | 125152505 | 125230002 | TC0200001879.mm.1 | 0.5  | 0.367405 |
| TC0Y00000478.mm.1 | NM_013667          | Slc22a2 | solute carrier family 22 (organic cation transp | 12584189  | 12628488  | TC1700000124.mm.1 | 0.2  | 0.367411 |
| TC0Y00000479.mm.1 | NM_010851          | Myd88   | myeloid differentiation primary response gene 8 | 119335934 | 119341411 | TC0900003241.mm.1 | 0.1  | 0.367415 |
| TC0Y00000481.mm.1 | NM_026772          | Cdc42ep | CDC42 effector protein (Rho GTPase binding) 2   | 5917556   | 5924816   | TC1900000991.mm.1 | 0.1  | 0.367456 |
| TC0Y00000484.mm.1 | ENSMUST00000122624 | n-R5s30 | nuclear encoded rRNA 5S 30                      | 5324036   | 5324157   | TC1600001159.mm.1 | 0.1  | 0.367771 |
| TC0Y00000485.mm.1 | ENSMUST00000157314 | Gm23676 | predicted gene, 23676                           | 4749752   | 4749856   | TC1200000030.mm.1 | 0.1  | 0.367985 |
| TC0Y00000486.mm.1 | ENSMUST00000158264 | Gm24211 | predicted gene, 24211                           | 74728403  | 74728509  | TC1100001048.mm.1 | 0.1  | 0.368165 |
| TC0Y00000487.mm.1 | XR_140702          | Gm19409 | predicted gene, 19409                           | 30815620  | 30818477  | TC0500000301.mm.1 | 0.1  | 0.368179 |
| TC0Y00000488.mm.1 | NR_029721          | Mir196a | microRNA 196a-1                                 | 96265164  | 96265265  | TC1100001491.mm.1 | 0.1  | 0.368424 |
| TC0Y00000491.mm.1 | NM_011030          | P4ha1   | procollagen-proline, 2-oxoglutarate 4-dioxygena | 59323296  | 59373304  | TC1000000531.mm.1 | 0.1  | 0.368467 |
| TC0Y00000494.mm.1 | ENSMUST00000083301 | Gm22974 | predicted gene, 22974                           | 80893654  | 80893756  | TC0500000749.mm.1 | -0.3 | 0.368586 |
| TC0Y00000495.mm.1 | NM_053113          | Ear11   | eosinophil-associated, ribonuclease A family, m | 51255261  | 51256112  | TC1400002002.mm.1 | 0.1  | 0.36864  |
| TC0Y00000497.mm.1 | ENSMUST00000158791 | Gm22116 | predicted gene, 22116                           | 49520029  | 49520169  | TC1400001962.mm.1 | -0.1 | 0.369043 |
| TC0Y00000500.mm.1 | ENSMUST00000117384 | Gm14087 | predicted gene 14087                            | 120550619 | 120550758 | TC0200001793.mm.1 | 0.4  | 0.369157 |
| TC0Y00000502.mm.1 | NM_0011644488      | Wars    | tryptophanyl-tRNA synthetase                    | 108860030 | 108894174 | TC1200002359.mm.1 | 0.1  | 0.369191 |
| TC0Y00000503.mm.1 | NM_022881          | Rgs18   | regulator of G-protein signaling 18             | 144752683 | 144775435 | TC0100003210.mm.1 | 0.3  | 0.369299 |
| TC0Y00000506.mm.1 | NM_001038015       | Gnpda2  | glucosamine-6-phosphate deaminase 2             | 69573108  | 69592337  | TC0500002552.mm.1 | -0.1 | 0.369309 |
| TC0Y00000509.mm.1 | NM_175398          | Fam212b | family with sequence similarity 212, member B   | 105704599 | 105720842 | TC0300001094.mm.1 | 0.0  | 0.369471 |
| TC0Y00000510.mm.1 | ENSMUST00000108970 | Gm14401 | predicted gene 14401                            | 177074320 | 177087347 | TC0200002746.mm.1 | 0.2  | 0.369523 |
| TC0Y00000512.mm.1 | NM_145622          | Zfp71-r | zinc finger protein 71, related sequence        | 67705306  | 67729173  | TC1300002259.mm.1 | -0.1 | 0.369547 |
| TC0Y00000516.mm.1 | ENSMUST00000115821 | Gm10563 | predicted gene 10563                            | 155614413 | 155645408 | TC0400004145.mm.1 | 0.1  | 0.369649 |
| TC0Y00000518.mm.1 | NM_021793          | Tmem8   | transmembrane protein 8 (five membrane-spanr    | 26123316  | 26123254  | TC1700000402.mm.1 | 0.1  | 0.369654 |
| TC0Y00000520.mm.1 | NM_013581          | Cog1    | component of oligomeric golgi complex 1         | 113649169 | 113667054 | TC1100001860.mm.1 | -0.1 | 0.369662 |
| TC0Y00000525.mm.1 | NM_001033139       | Al84614 | expressed sequence Al846148                     | 7356464   | 7383026   | TC1900001042.mm.1 | 0.0  | 0.369683 |
| TC0Y00000529.mm.1 | NM_007785          | Csn1s2a | casein alpha s2-like A                          | 87774567  | 87788797  | TC0500000796.mm.1 | 0.1  | 0.369778 |
| TC0Y00000533.mm.1 | ENSMUST00000157666 | Gm26412 | predicted gene, 26412                           | 171732060 | 171732114 | TC0100003553.mm.1 | -0.4 | 0.369816 |
| TC0Y00000534.mm.1 | NM_021427          | Fam181b | family with sequence similarity 181, member B   | 93079879  | 93081722  | TC0700001325.mm.1 | 0.1  | 0.370004 |
| TC0Y00000536.mm.1 | ENSMUST00000158299 | Gm24298 | predicted gene, 24298                           | 120605537 | 120605596 | TC1000001483.mm.1 | 0.4  | 0.37015  |
| TC0Y00000537.mm.1 | ENSMUST00000157491 | Gm24063 | predicted gene, 24063                           | 117776794 | 117776898 | TC0700001691.mm.1 | 0.2  | 0.370152 |
| TC0Y00000544.mm.1 | NM_008060          | Ganab   | alpha glucosidase 2 alpha neutral subunit       | 8898090   | 8916666   | TC1900000165.mm.1 | 0.1  | 0.370304 |
| TC0Y00000551.mm.1 | ENSMUST00000177769 | LOC1010 | Y-linked testis-specific protein 1-like // Y-I  | 82019244  | 82020055  | TC0Y00000502.mm.1 | -0.1 | 0.370462 |
| TC0Y00000552.mm.1 | NM_175419          | Actr5   | ARP5 actin-related protein 5                    | 158624888 | 158639211 | TC0200002438.mm.1 | 0.0  | 0.370495 |
| TC0Y00000563.mm.1 | ENSMUST00000185135 | SPRY4-I | SPRY4-IT1 conserved region 2                    | 38594365  | 38594483  | TC1800000405.mm.1 | -0.1 | 0.370497 |
| TC0Y00000565.mm.1 | NR_033601          | 4930519 | pyruvate dehydrogenase E1 alpha 1 pseudogene    | 28880921  | 28923507  | TC1000001928.mm.1 | -0.1 | 0.370674 |
| TC1000000004.mm.1 | NM_008404          | Itgb2   | integrin beta 2                                 | 77530252  | 77565708  | TC1000000759.mm.1 | -0.3 | 0.370865 |
| TC1000000015.mm.1 | NM_198019          | Cep78   | centrosomal protein 78                          | 15955773  | 15984989  | TC1900001205.mm.1 | 0.0  | 0.370943 |
| TC1000000016.mm.1 | NR_027897          | 610012  | RIKEN cDNA 0610012G03 gene                      | 31947051  | 31948521  | TC1600001492.mm.1 | -0.1 | 0.37135  |
| TC1000000019.mm.1 | ENSMUST00000082543 | Gm23404 | predicted gene, 23404                           | 156455999 | 156456095 | TC0X00003243.mm.1 | -0.1 | 0.371418 |
| TC1000000021.mm.1 | ENSMUST00000103968 | n-R5s90 | nuclear encoded rRNA 5S 90                      | 111613898 | 111614015 | TC0900003133.mm.1 | 0.3  | 0.371645 |
| TC1000000029.mm.1 | ENSMUST00000157156 | Gm23168 | predicted gene, 23168                           | 124492906 | 124493048 | TC0700001781.mm.1 | -0.1 | 0.371678 |
| TC1000000031.mm.1 | NCBI_Gene:640340:p | Igkv8-1 | immunoglobulin kappa variable 8-16              | 70386672  | 70387238  | TC0600003594.mm.1 | -0.3 | 0.371794 |
| TC1000000035.mm.1 | NM_025710          | Uqcrrf1 | ubiquinol-cytochrome c reductase, Rieske iron-s | 30540308  | 30545362  | TC1300001733.mm.1 | 0.0  | 0.371865 |
| TC1000000037.mm.1 | NM_023423          | Akirin1 | akirin 1                                        | 123734559 | 123750345 | TC0400003490.mm.1 | -0.1 | 0.372003 |
| TC1000000042.mm.1 | NM_177582          | Mlxip   | MLX interacting protein                         | 123394798 | 123457932 | TC0500001416.mm.1 | 0.1  | 0.37218  |
| TC1000000050.mm.1 | ENSMUST00000117979 | Gm11189 | predicted gene 11189                            | 53200684  | 53201058  | TC1100000599.mm.1 | 0.1  | 0.372202 |
| TC1000000056.mm.1 | NM_0217853         | Mettl7b | methyltransferase like 7B                       | 128958275 | 128960988 | TC1000003169.mm.1 | 0.2  | 0.372269 |
| TC1000000057.mm.1 | NM_054045          | Hist2h3 | histone cluster 2, H3c2                         | 96238108  | 96239127  | TC0300002500.mm.1 | -0.1 | 0.372398 |
| TC1000000070.mm.1 | NM_025622          | Lgals2  | lectin, galactose-binding, soluble 2            | 78850860  | 78855529  | TC1500001849.mm.1 | 0.1  | 0.372439 |
| TC1000000077.mm.1 | NM_153072          | Hus1b   | Hus1 homolog b (S. pombe)                       | 30946573  | 30947761  | TC1300001739.mm.1 | -0.1 | 0.372588 |
| TC1000000080.mm.1 | ENSMUST00000035626 | 4930480 | RIKEN cDNA 4930480E11 gene                      | 78369643  | 78371128  | TC0X00000784.mm.1 | -0.1 | 0.372595 |
| TC1000000084.mm.1 | NM_025630          | Aggf1   | angiogenic factor with G patch and FHA domains  | 95350683  | 95375357  | TC1300002457.mm.1 | -0.1 | 0.372775 |
| TC1000000087.mm.1 | NM_001010833       | Mdc1    | mediator of DNA damage checkpoint 1             | 35841498  | 35859670  | TC1700000705.mm.1 | -0.1 | 0.372822 |
| TC1000000090.mm.1 | ENSMUST00000184232 | mmu-mir | mmu-mir-378d                                    | 126710282 | 126710391 | TC1000003087.mm.1 | -0.1 | 0.372843 |
| TC1000000097.mm.1 | NR_105841          | Mir378d | microRNA mir-378d (Mir378d), microRNA.          | 0         | 0         | TSUnmapped0000011 | -0.1 | 0.372843 |
| TC1000000100.mm.1 | NR_030262          | Mir539  | microRNA 539                                    | 109728129 | 109728202 | TC1200001189.mm.1 | 0.1  | 0.372911 |
| TC1000000107.mm.1 | ENSMUST00000157760 | Gm24689 | predicted gene, 24689                           | 50918425  | 50918528  | TC1400000572.mm.1 | 0.1  | 0.373042 |
| TC1000000119.mm.1 | ENSMUST00000178571 | Gm9167  | predicted gene 9167                             | 33312135  | 33313101  | TC0700000611.mm.1 | -0.1 | 0.373085 |
| TC1000000122.mm.1 | ENSMUST00000117568 | Gm11628 | predicted gene 11628                            | 102492439 | 102492609 | TC1100003842.mm.1 | 0.1  | 0.373136 |
| TC1000000133.mm.1 | NM_025894          | Psmid12 | proteasome (prosome, macropain) 26S subunit,    | 107479484 | 107504362 | TC1100001799.mm.1 | -0.2 | 0.373189 |
| TC1000000146.mm.1 | XM_987009          | Gm8362  | predicted gene 8362                             | 6765962   | 6774411   | TC1000001416.mm.1 | 0.1  | 0.37323  |
| TC1000000150.mm.1 | NM_011267          | Rgs16   | regulator of G-protein signaling 16             | 153740349 | 153745468 | TC0100001381.mm.1 | -0.1 | 0.373397 |
| TC1000000152.mm.1 | NM_022992          | Arl6ip5 | ADP-ribosylation factor-like 6 interacting prot | 97210689  | 97233315  | TC0600001129.mm.1 | -0.1 | 0.373407 |
| TC1000000158.mm.1 | NM_008231          | Hdgf    | hepatoma-derived growth factor                  | 87906321  | 87916132  | TC0300000707.mm.1 | -0.1 | 0.373553 |
| TC1000000164.mm.1 | ENSMUST00000157322 | Gm24249 | predicted gene, 24249                           | 88087188  | 88087251  | TC0700003704.mm.1 | 0.1  | 0.373612 |
| TC1000000165.mm.1 | ENSMUST00000082987 | Gm22229 | predicted gene, 22229                           | 70537814  | 70537921  | TC0900000937.mm.1 | 0.1  | 0.373836 |
| TC1000000174.mm.1 | NM_020604          | Jph1    | junctophilin 1                                  | 16994938  | 17097889  | TC0100002012.mm.1 | 0.1  | 0.373854 |
| TC1000000177.mm.1 | NR_037269          | Mir466n | microRNA 466n                                   | 10513741  | 10513834  | TC0200000196.mm.1 | 0.1  | 0.374184 |
| TC1000000179.mm.1 | ENSMUST00000166597 | Trp53-p | transformation related protein 53, pseudogene   | 54420055  | 54420195  | TC1700000983.mm.1 | -0.2 | 0.374305 |
| TC1000000192.mm.1 | ENSMUST00000158005 | Gm22312 | predicted gene, 22312                           | 93509573  | 93509702  | TC0600001108.mm.1 | 0.1  | 0.374366 |
| TC1000000193.mm.1 | NM_175086          | Agt11b  | angiotensin II receptor, type 1b                | 20314473  | 20367177  | TC0300001708.mm.1 | 0.1  | 0.374572 |
| TC1000000199.mm.1 | NM_146757          | Olfr583 | olfactory receptor 583                          | 103051300 | 103052259 | TC0700001475.mm.1 | 0.1  | 0.374682 |
| TC1000000202.mm.1 | NM_016771          | Sult1d1 | sulfotransferase family 1D, member 1            | 87554645  | 87569027  | TC0500002699.mm.1 | 0.5  | 0.374878 |
| TC1000000203.mm.1 | NR_046286          | H2-T10  | histocompatibility 2, T region locus 10         | 36115871  | 36121465  | TC1700002823.mm.1 | -0.1 | 0.374982 |
| TC1000000205.mm.1 | ENSMUST00000175489 | Gm24109 | predicted gene, 24109                           | 87617399  | 87617501  | TC0300000699.mm.1 | 0.1  | 0.375148 |
| TC1000000208.mm.1 | NCBI_Gene:238412:p | Ighv2-3 | Ighv2-3 immunoglobulin heavy variable 2-3       | 113611184 | 113611617 | TC1200002557.mm.1 | -0.3 | 0.375213 |
| TC1000000215.mm.1 | ENSMUST00000104788 | Mir466f | microRNA 466f-3                                 | 10471953  | 10472046  | TC0200000100.mm.1 | 0.2  | 0.37542  |
| TC1000000220.mm.1 | ENSMUST00000164344 | Gm17617 | predicted gene, 17617                           | 55132962  | 55133548  | TC1300002049.mm.1 | 0.1  | 0.375536 |
| TC1000000229.mm.1 | NM_010871          | Naip6   | NLR family, apoptosis inhibitory protein 6      | 100281121 | 100317688 | TC1300002532.mm.1 | 0.1  | 0.375537 |

|                   |                    |         |                                                 |           |           |                   |      |          |
|-------------------|--------------------|---------|-------------------------------------------------|-----------|-----------|-------------------|------|----------|
| TC1000000232.mm.1 | NM_025464          | Tmem218 | transmembrane protein 218                       | 37208333  | 37223211  | TC0900000358.mm.1 | 0.1  | 0.375948 |
| TC1000000240.mm.1 | ENSMUST00000083138 | Gm24533 | predicted gene, 24533                           | 73141485  | 73141680  | TC0600002506.mm.1 | -0.1 | 0.375961 |
| TC1000000243.mm.1 | ENSMUST00000099683 | Gm10800 | predicted gene 10800                            | 98666547  | 98667301  | TC0200004196.mm.1 | 0.1  | 0.376066 |
| TC1000000244.mm.1 | ENSMUST00000054878 | C330006 | RIKEN cDNA C330006D17 gene                      | 7836687   | 7837064   | TC0900001721.mm.1 | 0.0  | 0.37607  |
| TC1000000259.mm.1 | NM_001033525       | Kcnk6   | potassium inwardly-rectifying channel, subfamil | 29221928  | 29232522  | TC0700002718.mm.1 | 0.1  | 0.376098 |
| TC1000000260.mm.1 | ENSMUST00000157410 | Gm22885 | predicted gene, 22885                           | 36162015  | 36162121  | TC1600001563.mm.1 | 0.1  | 0.376277 |
| TC1000000265.mm.1 | ENSMUST00000116058 | Rpl28-p | ribosomal protein L28, pseudogene 3             | 126069867 | 126070280 | TC0400003526.mm.1 | -0.2 | 0.376293 |
| TC1000000266.mm.1 | NM_199447          | Rrp12   | ribosomal RNA processing 12 homolog (S. cerevi  | 41862851  | 41866173  | TC1900001512.mm.1 | -0.1 | 0.376379 |
| TC1000000269.mm.1 | ENSMUST00000105149 | Ifna13  | interferon alpha 13                             | 88643641  | 88644459  | TC0400003009.mm.1 | -0.1 | 0.376384 |
| TC1000000275.mm.1 | ENSMUST00000083363 | Gm26123 | predicted gene, 26123                           | 65902057  | 65902191  | TC0800000682.mm.1 | -0.2 | 0.376603 |
| TC1000000278.mm.1 | NM_021400          | Prg4    | proteoglycan 4 (megakaryocyte stimulating fact  | 150449412 | 150466165 | TC0100003240.mm.1 | 0.3  | 0.376679 |
| TC1000000279.mm.1 | NM_025429          | Serpinb | serine (or cysteine) peptidase inhibitor, clade | 32842092  | 32851185  | TC1300001762.mm.1 | -0.3 | 0.377305 |
| TC1000000282.mm.1 | NM_008116          | Ggt1    | gamma-glutamyltransferase 1                     | 75561604  | 75586200  | TC1800000717.mm.1 | 0.2  | 0.377371 |
| TC1000000297.mm.1 | ENSMUST00000115931 | AC12514 | N/A                                             | 135395    | 136519    | TC1_GL456210_rand | -0.4 | 0.377491 |
| TC1000000301.mm.1 | ENSMUST00000157905 | Gm23280 | predicted gene, 23280                           | 76830034  | 76830172  | TC0X00000765.mm.1 | -0.1 | 0.377538 |
| TC1000000303.mm.1 | NM_010209          | Fh1     | fumarate hydratase 1                            | 175600374 | 175625635 | TC0100003610.mm.1 | 0.1  | 0.377554 |
| TC1000000312.mm.1 | NM_009113          | S100a13 | S100 calcium binding protein A13                | 90514435  | 90524581  | TC0300000800.mm.1 | 0.1  | 0.377634 |
| TC1000000317.mm.1 | NM_201372          | Ccdc84  | coiled-coil domain containing 84                | 44410159  | 44418021  | TC0900002165.mm.1 | 0.0  | 0.377678 |
| TC1000000324.mm.1 | NM_001276684       | Arc     | activity regulated cytoskeletal-associated prot | 74669081  | 74672570  | TC1500001712.mm.1 | -0.1 | 0.377816 |
| TC1000000333.mm.1 | ENSMUST00000157803 | Gm22556 | predicted gene, 22556                           | 115052814 | 115052913 | TC0800002983.mm.1 | 0.1  | 0.377988 |
| TC1000000342.mm.1 | ENSMUST00000182071 | Gm9034  | predicted pseudogene 9034                       | 43821231  | 43822238  | TC1000000407.mm.1 | -0.1 | 0.377991 |
| TC1000000360.mm.1 | NM_029019          | Stard6  | StAR-related lipid transfer (START) domain cont | 70472454  | 70501066  | TC1800000758.mm.1 | 0.0  | 0.378084 |
| TC1000000363.mm.1 | ENSMUST00000180040 | Gm21921 | predicted gene, 21921                           | 24795161  | 24796243  | TC0Y00000287.mm.1 | -0.1 | 0.378399 |
| TC1000000364.mm.1 | NR_003644          | 1700049 | hematological and neurological expressed 1-like | 71979885  | 71980694  | TC1000002363.mm.1 | -0.1 | 0.378414 |
| TC1000000370.mm.1 | NM_019662          | Rrad    | Ras-related associated with diabetes            | 104628066 | 104631321 | TC0800002807.mm.1 | -0.1 | 0.378591 |
| TC1000000381.mm.1 | NM_021898          | Tsga8   | testis specific gene A8                         | 83486674  | 83487924  | TC0X00002550.mm.1 | -0.1 | 0.378904 |
| TC1000000388.mm.1 | NM_001033981       | Hbg1b   | hemoglobin, theta 1B                            | 32286964  | 32287912  | TC1100000337.mm.1 | 0.1  | 0.379119 |
| TC1000000401.mm.1 | ENSMUST00000100173 | Gm13414 | predicted gene 13414                            | 34648895  | 34650362  | TC0200003346.mm.1 | -0.1 | 0.379483 |
| TC1000000402.mm.1 | ENSMUST00000104211 | Gm24335 | predicted gene, 24335                           | 23290033  | 23290164  | TC0800001886.mm.1 | 0.1  | 0.379832 |
| TC1000000407.mm.1 | NM_015808          | Krtap5- | keratin associated protein 5-1                  | 142296334 | 142297072 | TC0700004563.mm.1 | -0.1 | 0.379929 |
| TC1000000409.mm.1 | ENSMUST00000122575 | Gm24184 | predicted gene, 24184                           | 31661331  | 31661431  | TC0800001981.mm.1 | 0.1  | 0.379941 |
| TC1000000413.mm.1 | NR_028146          | Stoml1  | stomatin-like 1                                 | 58253164  | 58263209  | TC0900000730.mm.1 | 0.0  | 0.380047 |
| TC1000000415.mm.1 | NM_021513          | Thap11  | THAP domain containing 11                       | 105855103 | 105856950 | TC0800001230.mm.1 | -0.1 | 0.380469 |
| TC1000000418.mm.1 | ENSMUST00000082849 | Gm22684 | predicted gene, 22684                           | 20033504  | 20033635  | TC1900001238.mm.1 | -0.1 | 0.380957 |
| TC1000000420.mm.1 | ENSMUST00000157558 | Gm22215 | predicted gene, 22215                           | 80033514  | 80033609  | TC1700001205.mm.1 | -0.1 | 0.38096  |
| TC1000000422.mm.1 | ENSMUST00000104538 | Gm22900 | predicted gene, 22900                           | 124501574 | 124501703 | TC0300001263.mm.1 | 0.2  | 0.381151 |
| TC1000000429.mm.1 | ENSMUST00000047870 | Olf101  | olfactory receptor 1015                         | 85785474  | 85786489  | TC0200001249.mm.1 | 0.1  | 0.381232 |
| TC1000000435.mm.1 | ENSMUST00000121854 | Gm5809  | predicted pseudogene 5809                       | 22230391  | 22230919  | TC1600000310.mm.1 | -0.1 | 0.381355 |
| TC1000000440.mm.1 | ENSMUST00000104121 | n-R5s8  | nuclear encoded rRNA 5S 8                       | 71131237  | 71131354  | TC0X00000645.mm.1 | 0.1  | 0.381367 |
| TC1000000468.mm.1 | NM_029887          | Yif1b   | Yip1 interacting factor homolog B (S. cerevisia | 29238323  | 29247593  | TC0700000526.mm.1 | 0.1  | 0.381542 |
| TC1000000484.mm.1 | ENSMUST00000097166 | Gm6419  | predicted gene 6419                             | 74863419  | 74863419  | TC0300002369.mm.1 | 0.1  | 0.381544 |
| TC1000000492.mm.1 | NM_009608          | Actc1   | actin, alpha, cardiac muscle 1                  | 114047282 | 114053548 | TC0200004369.mm.1 | -0.1 | 0.381584 |
| TC1000000497.mm.1 | ENSMUST00000158078 | Gm25555 | predicted gene, 25555                           | 32804867  | 32804977  | TC1700001850.mm.1 | 0.1  | 0.381632 |
| TC1000000507.mm.1 | ENSMUST00000157850 | Gm23084 | predicted gene, 23084                           | 3648537   | 3648650   | TC1300000010.mm.1 | -0.1 | 0.381815 |
| TC1000000509.mm.1 | ENSMUST00000163826 | Gm8374  | predicted gene 8374                             | 7362097   | 7365134   | TC1400001425.mm.1 | -0.1 | 0.381861 |
| TC1000000527.mm.1 | ENSMUST00000181591 | Gm8177  | predicted gene 8177                             | 57135496  | 57136831  | TC0300002021.mm.1 | -0.1 | 0.381873 |
| TC1000000529.mm.1 | ENSMUST00000089182 | Gm10231 | predicted pseudogene 10231                      | 5816054   | 5816700   | TC1700001373.mm.1 | -0.1 | 0.381888 |
| TC1000000531.mm.1 | NM_010382          | H2-Eb1  | histocompatibility 2, class II antigen E beta   | 34305867  | 34316674  | TC1700002782.mm.1 | -0.4 | 0.381905 |
| TC1000000533.mm.1 | ENSMUST00000122463 | Gm8089  | predicted gene 8089                             | 107290341 | 107302354 | TC0100002909.mm.1 | -0.1 | 0.381937 |
| TC1000000536.mm.1 | ENSMUST00000083710 | Gm25859 | predicted gene, 25859                           | 19934863  | 19934953  | TC0200000321.mm.1 | -0.1 | 0.382096 |
| TC1000000539.mm.1 | ENSMUST00000093693 | Gm22444 | predicted gene, 22444                           | 52927070  | 52927177  | TC0700000920.mm.1 | -0.4 | 0.382121 |
| TC1000000540.mm.1 | NM_001033416       | Gal3st4 | galactose 3-O-sulfotransferase 4                | 138264921 | 138272840 | TC0500003740.mm.1 | -0.1 | 0.382127 |
| TC1000000541.mm.1 | ENSMUST00000104145 | Gm23015 | predicted gene, 23015                           | 57128645  | 57128772  | TC0500002439.mm.1 | -0.1 | 0.382144 |
| TC1000000543.mm.1 | NCBI_Gene:380808:p | Ighv10- | immunoglobulin heavy variable 10-1              | 114479005 | 114479451 | TC1200002599.mm.1 | -0.3 | 0.382226 |
| TC1000000546.mm.1 | NCBI_Gene:668438:p | Ighv3-3 | immunoglobulin heavy variable V3-3              | 114196439 | 114196875 | TC1200002472.mm.1 | -0.1 | 0.382318 |
| TC1000000547.mm.1 | NM_008199          | H2-BI   | histocompatibility 2, blastocyst                | 36080111  | 36084398  | TC1700001998.mm.1 | 0.0  | 0.382361 |
| TC1000000556.mm.1 | ENSMUST00000085491 | Gm6822  | predicted pseudogene 6822                       | 55160740  | 55161053  | TC0100002355.mm.1 | -0.1 | 0.382479 |
| TC1000000558.mm.1 | NM_009451          | Tubb4a  | tubulin, beta 4A class IVA                      | 57080066  | 57087782  | TC1700002348.mm.1 | -0.1 | 0.38258  |
| TC1000000560.mm.1 | NR_029716          | Mir30c- | microRNA 30c-1                                  | 120769534 | 120769622 | TC0400003441.mm.1 | 0.1  | 0.382585 |
| TC1000000566.mm.1 | ENSMUST00000122021 | Gm14702 | predicted gene 14702                            | 68970505  | 68970950  | TC0X00000616.mm.1 | 0.2  | 0.382774 |
| TC1000000572.mm.1 | NM_001081957       | Wfdc17  | WAP four-disulfide core domain 17               | 83703991  | 83706269  | TC1100001264.mm.1 | -0.2 | 0.382875 |
| TC1000000575.mm.1 | NM_010007          | Cyp2j5  | cytochrome P450, family 2, subfamily j, polypep | 96627432  | 96664154  | TC0400003101.mm.1 | 0.5  | 0.382961 |
| TC1000000578.mm.1 | NM_025551          | Ndufa12 | NADH dehydrogenase (ubiquinone) 1 alpha subc    | 94198955  | 94221443  | TC1000001148.mm.1 | 0.1  | 0.383393 |
| TC1000000592.mm.1 | NM_030017          | Rdh12   | retinol dehydrogenase 12                        | 79208914  | 79222665  | TC1200000718.mm.1 | -0.1 | 0.3835   |
| TC1000000596.mm.1 | NR_030442          | Mir677  | microRNA 677                                    | 128085286 | 128085363 | TC0300001586.mm.1 | -0.3 | 0.38352  |
| TC1000000599.mm.1 | ENSMUST00000082639 | Gm25802 | predicted gene, 25802                           | 100303288 | 100303364 | TC0300000995.mm.1 | 0.1  | 0.383593 |
| TC1000000604.mm.1 | NR_029884          | Mir383  | microRNA 383                                    | 38252131  | 38252204  | TC0800002091.mm.1 | 0.1  | 0.383639 |
| TC1000000618.mm.1 | NM_001167736       | Chchd6  | coiled-coil-helix-coiled-coil-helix domain cont | 89383146  | 89595652  | TC0600002698.mm.1 | 0.1  | 0.383646 |
| TC1000000636.mm.1 | ENSMUST00000104762 | Gm22007 | predicted gene, 22007                           | 97292019  | 97292108  | TC1300001102.mm.1 | 0.2  | 0.383812 |
| TC1000000653.mm.1 | NM_009202          | Slc22a1 | solute carrier family 22 (organic cation transp | 12648874  | 12675838  | TC1700001450.mm.1 | 0.2  | 0.383981 |
| TC1000000674.mm.1 | ENSMUST00000157745 | Gm22880 | predicted gene, 22880                           | 17865317  | 17865419  | TC1900001225.mm.1 | -0.1 | 0.384001 |
| TC1000000683.mm.1 | NM_134032          | Hoxb2   | homeobox B2                                     | 96350525  | 96354016  | TC1100001500.mm.1 | 0.0  | 0.384003 |
| TC1000000692.mm.1 | ENSMUST00000184479 | DLEU2_1 | Deleted in lymphocytic leukemia 2 conserved re  | 61629093  | 61629206  | TC1400000868.mm.1 | 0.1  | 0.384186 |
| TC1000000697.mm.1 | ENSMUST00000171906 | Gm3667  | predicted gene 3667                             | 6868502   | 6889962   | TC1400002847.mm.1 | 0.1  | 0.384351 |
| TC1000000708.mm.1 | ENSMUST00000104055 | Gm23270 | predicted gene, 23270                           | 58615359  | 58615489  | TC1800001390.mm.1 | 0.2  | 0.384446 |
| TC1000000711.mm.1 | NR_033472          | Gm10768 | predicted gene 10768                            | 43838803  | 43840845  | TC1900000637.mm.1 | 0.1  | 0.384523 |
| TC1000000713.mm.1 | ENSMUST00000082872 | Gm24038 | predicted gene, 24038                           | 48230286  | 48230444  | TC0X00000428.mm.1 | 0.1  | 0.384722 |
| TC1000000716.mm.1 | NCBI_Gene:545848:p | Igkv4-8 | immunoglobulin kappa variable 4-80              | 69016558  | 69017080  | TC0600003554.mm.1 | -0.6 | 0.384747 |

|                   |                    |         |                                                 |           |           |                    |      |          |
|-------------------|--------------------|---------|-------------------------------------------------|-----------|-----------|--------------------|------|----------|
| TC1000000717.mm.1 | ENSMUST00000158368 | Gm22770 | predicted gene, 22770                           | 17483083  | 17483149  | TC1600001290.mm.1  | 0.2  | 0.384937 |
| TC1000000726.mm.1 | ENSMUST00000157433 | Gm26153 | predicted gene, 26153                           | 84737350  | 84737476  | TC1600000937.mm.1  | 0.0  | 0.384938 |
| TC1000000729.mm.1 | NM_007801          | Ctsh    | cathepsin H                                     | 90054152  | 90076095  | TC0900001155.mm.1  | 0.3  | 0.385345 |
| TC1000000732.mm.1 | ENSMUST00000082890 | Gm22443 | predicted gene, 22443                           | 13301001  | 13301107  | TC1900001180.mm.1  | 0.2  | 0.385522 |
| TC1000000736.mm.1 | XM_001472957       | Gm20805 | predicted gene, 20805                           | 74300212  | 74300895  | TC0Y00000465.mm.1  | 0.1  | 0.385557 |
| TC1000000738.mm.1 | NM_001013755       | 5730409 | RIKEN cDNA 5730409E04Rik gene                   | 126609818 | 126614371 | TC0400001467.mm.1  | -0.1 | 0.385592 |
| TC1000000742.mm.1 | ENSMUST00000175411 | Gm25032 | predicted gene, 25032                           | 39075411  | 39075494  | TC0900000424.mm.1  | -0.1 | 0.385596 |
| TC1000000743.mm.1 | ENSMUST00000119395 | Gm5466  | predicted gene 5466                             | 181896823 | 181898712 | TC0200002841.mm.1  | -0.1 | 0.385622 |
| TC1000000753.mm.1 | NM_001001176       | Taf9b   | TAF9B RNA polymerase II, TATA box binding pro   | 106206874 | 106221158 | TC0X00002826.mm.1  | 0.0  | 0.385765 |
| TC1000000759.mm.1 | NM_001142410       | Gm14124 | predicted gene 14124                            | 150257517 | 150270300 | TC0200002215.mm.1  | 0.0  | 0.385933 |
| TC1000000763.mm.1 | NM_015809          | Krtap5- | keratin associated protein 5-4                  | 142303502 | 142304503 | TC0700002073.mm.1  | -0.1 | 0.386033 |
| TC1000000765.mm.1 | ENSMUST00000104379 | Gm23200 | predicted gene, 23200                           | 53613067  | 53613198  | TC1500001523.mm.1  | 0.1  | 0.386097 |
| TC1000000768.mm.1 | ENSMUST00000061681 | Btg3    | B cell translocation gene 3                     | 50699825  | 50699880  | TC1700000955.mm.1  | -0.1 | 0.386144 |
| TC1000000769.mm.1 | NM_028333          | Angptl1 | angiopoietin-like 1                             | 156838562 | 156861079 | TC0100001425.mm.1  | 0.1  | 0.386283 |
| TC1000000770.mm.1 | ENSMUST00000034916 | Gm5564  | predicted gene 5564                             | 138504712 | 138505951 | TC0500001658.mm.1  | -0.1 | 0.386283 |
| TC1000000778.mm.1 | NR_028271          | Phxr4   | per-hexamer repeat gene 4                       | 13431361  | 13432751  | TC0900000086.mm.1  | 0.1  | 0.386354 |
| TC1000000782.mm.1 | NM_178732          | Zfp324  | zinc finger protein 324                         | 12965838  | 12974236  | TC0700000153.mm.1  | -0.1 | 0.386476 |
| TC1000000783.mm.1 | NM_030691          | Igfb6   | immunoglobulin superfamily, member 6            | 121064067 | 121074530 | TC0700004207.mm.1  | 0.2  | 0.386729 |
| TC1000000784.mm.1 | ENSMUST00000082877 | Gm22358 | predicted gene, 22358                           | 24811447  | 24811568  | TC1300001668.mm.1  | -0.5 | 0.386826 |
| TC1000000788.mm.1 | ENSMUST00000104231 | Gm23744 | predicted gene, 23744                           | 155954574 | 155954722 | TC0100001405.mm.1  | -0.2 | 0.386919 |
| TC1000000789.mm.1 | ENSMUST00000162660 | Nat8b   | N-acetyltransferase 8B                          | 85932681  | 85933379  | TC0600002627.mm.1  | -0.1 | 0.386987 |
| TC1000000809.mm.1 | NR_028562          | Snord91 | small nucleolar RNA, C/D box 91A                | 74905424  | 74905516  | TC1100001052.mm.1  | -0.1 | 0.387006 |
| TC1000000810.mm.1 | ENSMUST00000121726 | Gm14581 | predicted gene 14581                            | 51629490  | 51629687  | TC0X00002202.mm.1  | -0.1 | 0.387232 |
| TC1000000812.mm.1 | ENSMUST00000111423 | LOC6647 | Sp110 nuclear body protein-like                 | 17591     | 30203     | TC1_GL456221_rand  | -0.1 | 0.387327 |
| TC1000000819.mm.1 | NR_035463          | Mir1942 | microRNA 1942                                   | 76215611  | 76215673  | TC1500001768.mm.1  | 0.1  | 0.38749  |
| TC1000000824.mm.1 | ENSMUST00000178362 | Gm23660 | predicted gene, 23660                           | 59387953  | 59388031  | TC0700003154.mm.1  | -0.1 | 0.387709 |
| TC1000000826.mm.1 | NM_013930          | Aass    | aminoadipate-semialdehyde synthase              | 23072173  | 23132986  | TC0600001926.mm.1  | 0.3  | 0.387812 |
| TC1000000828.mm.1 | ENSMUST00000116710 | Gm25779 | predicted gene, 25779                           | 153013490 | 153013584 | TC0400004100.mm.1  | 0.1  | 0.38818  |
| TC1000000829.mm.1 | NM_001024673       | Ifnl2   | interferon lambda 2                             | 28508836  | 28510455  | TC0700002699.mm.1  | -0.1 | 0.388206 |
| TC1000000830.mm.1 | ENSMUST00000179674 | Gm22638 | predicted gene, 22638                           | 38380349  | 38380455  | TC0700000695.mm.1  | -0.3 | 0.388264 |
| TC1000000832.mm.1 | NM_178589          | Tnfrsf2 | tumor necrosis factor receptor superfamily, mem | 43016555  | 43089188  | TC1700000829.mm.1  | 0.1  | 0.388291 |
| TC1000000834.mm.1 | XM_001473465       | Gm4988  | predicted gene 4988                             | 61290803  | 61292480  | TC0X00000563.mm.1  | -0.1 | 0.388356 |
| TC1000000835.mm.1 | ENSMUST00000157600 | Gm22598 | predicted gene, 22598                           | 3535485   | 3535611   | TC1600001102.mm.1  | 0.1  | 0.388472 |
| TC1000000839.mm.1 | NM_177711          | Spata31 | spermatogenesis associated 31 subfamily D, mer  | 59725925  | 59731752  | TC1300002123.mm.1  | -0.1 | 0.389084 |
| TC1000000850.mm.1 | ENSMUST00000104019 | Gm25609 | predicted gene, 25609                           | 137215544 | 137215647 | TC0100003159.mm.1  | -0.1 | 0.389424 |
| TC1000000852.mm.1 | NM_201407          | Dennd4b | DENN/MADD domain containing 4B                  | 90265185  | 90280669  | TC0300000787.mm.1  | -0.1 | 0.389427 |
| TC1000000859.mm.1 | ENSMUST00000158117 | Gm23222 | predicted gene, 23222                           | 100500143 | 100500218 | TC0500002838.mm.1  | -0.1 | 0.389763 |
| TC1000000864.mm.1 | NM_026152          | Hoga1   | 4-hydroxy-2-oxoglutarate aldolase 1             | 42045610  | 42070953  | TC1900000607.mm.1  | 0.1  | 0.389832 |
| TC1000000866.mm.1 | NM_133825          | D1Ert6  | DNA segment, Chr 1, ERATO Doi 622, expressed    | 97643902  | 97662074  | TC0100002863.mm.1  | 0.0  | 0.389976 |
| TC1000000869.mm.1 | ENSMUST00000103990 | Gm25756 | predicted gene, 25756                           | 78779859  | 78779994  | TC0500000747.mm.1  | 0.2  | 0.390121 |
| TC1000000871.mm.1 | ENSMUST00000118518 | Gm12003 | predicted gene 12003                            | 12936834  | 12937938  | TC1100002234.mm.1  | -0.1 | 0.390386 |
| TC1000000877.mm.1 | ENSMUST00000083774 | Gm22826 | predicted gene, 22826                           | 102951949 | 102952113 | TC0300002621.mm.1  | 0.1  | 0.390563 |
| TC1000000884.mm.1 | NM_007646          | Cd38    | CD38 antigen                                    | 43868809  | 43912375  | TC0500000468.mm.1  | 0.4  | 0.390607 |
| TC1000000885.mm.1 | ENSMUST00000184593 | AC15282 | N/A                                             | 110674100 | 110674202 | TC1200001212.mm.1  | 0.1  | 0.390676 |
| TC1000000886.mm.1 | NM_009343          | Phf1    | PHD finger protein 1                            | 26933127  | 26937890  | TC1700000426.mm.1  | 0.1  | 0.390849 |
| TC1000000891.mm.1 | ENSMUST00000099365 | Gm10760 | predicted gene 10760                            | 76384318  | 76385028  | TC1300002344.mm.1  | -0.1 | 0.390888 |
| TC1000000893.mm.1 | ENSMUST00000082841 | Gm25205 | predicted gene, 25205                           | 64413648  | 64413750  | TC0600000753.mm.1  | -0.2 | 0.390931 |
| TC1000000894.mm.1 | NM_001033217       | Prickle | prickle homolog 1 (Drosophila)                  | 93499114  | 93595891  | TC1500002100.mm.1  | -0.1 | 0.391205 |
| TC1000000895.mm.1 | NM_029546          | Pwp2    | PWP2 periodic tryptophan protein homolog (yea   | 78170909  | 78185149  | TC1000002443.mm.1  | -0.1 | 0.391214 |
| TC1000000903.mm.1 | ENSMUST00000104150 | Gm23294 | predicted gene, 23294                           | 32800567  | 32800730  | TC1700001849.mm.1  | 0.1  | 0.391277 |
| TC1000000908.mm.1 | ENSMUST00000175021 | Gm24209 | predicted gene, 24209                           | 101140454 | 101140509 | TC1100003794.mm.1  | -0.3 | 0.391279 |
| TC1000000909.mm.1 | NM_027402          | Fndc5   | fibronectin type III domain containing 5        | 129136999 | 129144593 | TC0400001514.mm.1  | 0.0  | 0.391309 |
| TC1000000913.mm.1 | ENSMUST00000121385 | Gm12464 | predicted gene 12464                            | 100413560 | 100414575 | TC0300000996.mm.1  | 0.1  | 0.391637 |
| TC1000000915.mm.1 | ENSMUST00000147879 | Gm6963  | predicted gene 6963                             | 39424618  | 39424996  | TC1000002021.mm.1  | 0.1  | 0.391934 |
| TC1000000919.mm.1 | ENSMUST00000118177 | Gm15294 | predicted gene 15294                            | 141873409 | 141875235 | TC0X00003093.mm.1  | -0.1 | 0.392033 |
| TC1000000924.mm.1 | NM_009205          | Slc3a1  | solute carrier family 3, member 1               | 85028347  | 85064243  | TC1700001268.mm.1  | 0.4  | 0.392177 |
| TC1000000927.mm.1 | NM_019435          | Ndufb11 | NADH dehydrogenase (ubiquinone) 1 beta subcc    | 20615326  | 20617619  | TC0X00001927.mm.1  | -0.2 | 0.392217 |
| TC1000000936.mm.1 | ENSMUST00000118325 | Gm6418  | predicted gene 6418                             | 112459033 | 112462903 | TC0X00002871.mm.1  | -0.1 | 0.392227 |
| TC1000000940.mm.1 | NR_035486          | Mir1960 | microRNA 1960                                   | 30170739  | 30170816  | TC0500000287.mm.1  | 0.0  | 0.3924   |
| TC1000001010.mm.1 | NM_009376          | lft88   | intraflagellar transport 88                     | 57424062  | 57517936  | TC1400000817.mm.1  | 0.0  | 0.392499 |
| TC1000001020.mm.1 | ENSMUST00000184919 | mmu-mir | mmu-mir-6967                                    | 26920962  | 26921019  | TC1700000425.mm.1  | 0.1  | 0.392799 |
| TC1000001027.mm.1 | ENSMUST00000185129 | mmu-mir | mmu-mir-6967                                    | 33886676  | 33886733  | TC1700001883.mm.1  | 0.1  | 0.392799 |
| TC1000001028.mm.1 | ENSMUST00000083970 | Gm26109 | predicted gene, 26109                           | 34942644  | 34942713  | TC1800001165.mm.1  | -0.3 | 0.392829 |
| TC1000001029.mm.1 | ENSMUST00000172625 | Gm18128 | predicted gene, 18128                           | 42734409  | 42734919  | TC0700000745.mm.1  | -0.1 | 0.393216 |
| TC1000001038.mm.1 | NM_145553          | Fam76a  | family with sequence similarity 76, member A    | 132899213 | 132922558 | TC0400003687.mm.1  | 0.0  | 0.393405 |
| TC1000001048.mm.1 | NM_001044704       | Zscan21 | zinc finger and SCAN domain containing 21       | 138116903 | 138134265 | TC0500001642.mm.1  | -0.1 | 0.393497 |
| TC1000001053.mm.1 | NCBI_Gene:434685:p | Igkv8-2 | Igkv8-23-1 immunoglobulin kappa variable 8-23-  | 70240427  | 70240710  | TC0600000807.mm.1  | -0.2 | 0.393524 |
| TC1000001063.mm.1 | NCBI_Gene:619846:p | Igkv5-4 | immunoglobulin kappa variable 5-48              | 69726573  | 69727125  | TC06000003576.mm.1 | -0.5 | 0.393655 |
| TC1000001072.mm.1 | NM_138950          | Wdr81   | WD repeat domain 81                             | 75440943  | 75454717  | TC1100003225.mm.1  | 0.0  | 0.393662 |
| TC1000001079.mm.1 | NM_015730          | Chrna4  | cholinergic receptor, nicotinic, alpha polypept | 181018380 | 181043546 | TC04000005429.mm.1 | 0.1  | 0.393664 |
| TC1000001081.mm.1 | ENSMUST00000082632 | Gm24144 | predicted gene, 24144                           | 8220004   | 8220114   | TC1500000055.mm.1  | -0.3 | 0.393774 |
| TC1000001084.mm.1 | ENSMUST00000157812 | Gm24198 | predicted gene, 24198                           | 54458162  | 54458269  | TC1100000628.mm.1  | -0.1 | 0.393906 |
| TC1000001085.mm.1 | ENSMUST00000116777 | Gm24835 | predicted gene, 24835                           | 91252637  | 91252747  | TC0X00002609.mm.1  | 0.1  | 0.393909 |
| TC1000001099.mm.1 | NM_010011          | Cyp4a10 | cytochrome P450, family 4, subfamily a, polypep | 115518264 | 115533649 | TC0400004187.mm.1  | 0.3  | 0.393941 |
| TC1000001109.mm.1 | ENSMUST00000170414 | Gm17121 | predicted gene 17121                            | 7565259   | 7566105   | TC1400000067.mm.1  | 0.2  | 0.394055 |
| TC1000001119.mm.1 | ENSMUST00000180135 | Gm17222 | predicted gene 17222                            | 3210975   | 3211821   | TC1400001359.mm.1  | 0.2  | 0.394055 |
| TC1000001125.mm.1 | NM_144543          | Thyn1   | thymocyte nuclear protein 1                     | 26999677  | 27007334  | TC0900000254.mm.1  | -0.1 | 0.394095 |
| TC1000001131.mm.1 | NM_054048          | Rcor2   | REST corepressor 2                              | 7267325   | 7275225   | TC1900000134.mm.1  | -0.1 | 0.394115 |

|                   |                    |         |                                                 |           |           |                    |      |          |
|-------------------|--------------------|---------|-------------------------------------------------|-----------|-----------|--------------------|------|----------|
| TC1000001138.mm.1 | ENSMUST00000083027 | Gm22704 | predicted gene, 22704                           | 168335700 | 168335836 | TC0200002611.mm.1  | -0.1 | 0.394361 |
| TC1000001141.mm.1 | ENSMUST00000179213 | Gm23288 | predicted gene, 23288                           | 10490167  | 10490287  | TC0200000142.mm.1  | -0.1 | 0.394409 |
| TC1000001142.mm.1 | ENSMUST00000178419 | Gm22166 | predicted gene, 22166                           | 10497548  | 10497668  | TC0200000160.mm.1  | -0.1 | 0.394409 |
| TC1000001148.mm.1 | ENSMUST00000157798 | Gm22554 | predicted gene, 22554                           | 36775785  | 36775931  | TC1000002006.mm.1  | -0.2 | 0.394452 |
| TC1000001153.mm.1 | ENSMUST00000179052 | Gm25474 | predicted gene, 25474                           | 59784293  | 59784386  | TC0700003312.mm.1  | 0.1  | 0.394569 |
| TC1000001162.mm.1 | ENSMUST00000179176 | Gm22047 | predicted gene, 22047                           | 59791844  | 59791937  | TC0700003315.mm.1  | 0.1  | 0.394569 |
| TC1000001170.mm.1 | ENSMUST00000178411 | Gm23619 | predicted gene, 23619                           | 59804471  | 59804564  | TC0700003320.mm.1  | 0.1  | 0.394569 |
| TC1000001174.mm.1 | ENSMUST00000158399 | Gm25016 | predicted gene, 25016                           | 25266045  | 25266175  | TC1000001902.mm.1  | 0.1  | 0.394577 |
| TC1000001175.mm.1 | NR_030611          | Mir598  | microRNA 598                                    | 63727189  | 63727268  | TC1400000903.mm.1  | -0.1 | 0.394605 |
| TC1000001190.mm.1 | NM_016800          | Vti1b   | vesicle transport through interaction with t-SN | 79156017  | 79172667  | TC1200001979.mm.1  | 0.1  | 0.39475  |
| TC1000001193.mm.1 | ENSMUST00000083913 | Gm25188 | predicted gene, 25188                           | 86100534  | 86100655  | TC0300000677.mm.1  | -0.3 | 0.394818 |
| TC1000001204.mm.1 | NM_001146330       | Gpr52   | G protein-coupled receptor 52                   | 160576668 | 160577753 | TC0100003361.mm.1  | -0.1 | 0.394897 |
| TC1000001207.mm.1 | NM_001037247       | Defb36  | defensin beta 36                                | 152604327 | 152612729 | TC0200000291.mm.1  | -0.1 | 0.394921 |
| TC1000001216.mm.1 | NM_026211          | Tmed9   | transmembrane emp24 protein transport domai     | 55592952  | 55597697  | TC1300000667.mm.1  | -0.1 | 0.394965 |
| TC1000001219.mm.1 | NM_001272033       | AA41476 | expressed sequence AA414768                     | 12936872  | 12938541  | TC0X00000156.mm.1  | -0.1 | 0.394967 |
| TC1000001220.mm.1 | NM_019794          | Dnaja2  | DnaJ (Hsp40) homolog, subfamily A, member 2     | 85537640  | 85555368  | TC0800002617.mm.1  | -0.1 | 0.395097 |
| TC1000001223.mm.1 | NM_010925          | Rrp1    | ribosomal RNA processing 1 homolog (S. cerevisi | 78400362  | 78413043  | TC0400002451.mm.1  | -0.2 | 0.395368 |
| TC1000001224.mm.1 | NM_133823          | Mmaa    | methylmalonic aciduria (cobalamin deficiency) t | 79266424  | 79294956  | TC0800002516.mm.1  | 0.0  | 0.39552  |
| TC1000001239.mm.1 | ENSMUST00000181607 | Gm5974  | predicted gene 5974                             | 48313866  | 48314851  | TC0100002297.mm.1  | -0.1 | 0.395777 |
| TC1000001244.mm.1 | ENSMUST00000157710 | Gm22843 | predicted gene, 22843                           | 78550746  | 78550879  | TC0X000002515.mm.1 | -0.1 | 0.395851 |
| TC1000001249.mm.1 | ENSMUST00000158677 | Gm26208 | predicted gene, 26208                           | 24680814  | 24680937  | TC0800000309.mm.1  | 0.1  | 0.396045 |
| TC1000001251.mm.1 | NM_170759          | Zfp628  | zinc finger protein 628                         | 4915217   | 4922003   | TC0700000048.mm.1  | 0.0  | 0.396087 |
| TC1000001252.mm.1 | ENSMUST00000082692 | Gm22306 | predicted gene, 22306                           | 37282051  | 37282157  | TC0200000684.mm.1  | -0.5 | 0.396104 |
| TC1000001253.mm.1 | XR_105595          | Gm3373  | predicted gene 3373                             | 5718334   | 5741602   | TC1400002839.mm.1  | 0.1  | 0.396186 |
| TC1000001259.mm.1 | NCBI_Gene:238427:p | Ighv6-6 | immunoglobulin heavy variable 6-6               | 114434788 | 114435244 | TC1200002596.mm.1  | -0.6 | 0.396263 |
| TC1000001266.mm.1 | XM_892661          | Scgb2b1 | secretoglobulin, family 2B, member 10           | 32092145  | 32093939  | TC0700002798.mm.1  | -0.1 | 0.396521 |
| TC1000001270.mm.1 | ENSMUST00000083033 | Gm24405 | predicted gene, 24405                           | 178636905 | 178637071 | TC0100001693.mm.1  | -0.4 | 0.396569 |
| TC1000001271.mm.1 | ENSMUST00000178711 | Gm7929  | predicted gene 7929                             | 41747282  | 41750595  | TC1400001807.mm.1  | 0.1  | 0.396734 |
| TC1000001273.mm.1 | ENSMUST00000158088 | Gm22729 | predicted gene, 22729                           | 119306629 | 119306757 | TC0900003240.mm.1  | -0.1 | 0.39684  |
| TC1000001283.mm.1 | ENSMUST00000083396 | Gm25755 | predicted gene, 25755                           | 65771511  | 65771617  | TC03000002100.mm.1 | -0.2 | 0.396857 |
| TC1000001284.mm.1 | ENSMUST00000171706 | Gm3629  | predicted gene 3629                             | 6583959   | 6590613   | TC1400002845.mm.1  | 0.1  | 0.396952 |
| TC1000001285.mm.1 | ENSMUST00000184367 | AC15480 | N/A                                             | 40367836  | 40367836  | TC1600001620.mm.1  | 0.0  | 0.397022 |
| TC1000001298.mm.1 | ENSMUST00000128361 | Pabpc1l | poly(A) binding protein, cytoplasmic 1-like 2A, | 103066668 | 103067180 | TC0X00002768.mm.1  | -0.1 | 0.397232 |
| TC1000001299.mm.1 | ENSMUST00000179195 | n-R5s10 | nuclear encoded rRNA 5S 109                     | 123554060 | 123554178 | TC08000003113.mm.1 | -0.4 | 0.39738  |
| TC1000001301.mm.1 | NM_029366          | Kxd1    | KxDL motif containing 1                         | 70513396  | 70527956  | TC0800003245.mm.1  | 0.1  | 0.397419 |
| TC1000001304.mm.1 | ENSMUST00000116930 | Mir466f | microRNA 466f-4                                 | 71107089  | 71107209  | TC1300000868.mm.1  | 0.2  | 0.397486 |
| TC1000001316.mm.1 | NR_035408          | Mir669a | microRNA 669a-1                                 | 51147896  | 51613053  | TC1700000956.mm.1  | 0.1  | 0.397686 |
| TC1000001320.mm.1 | NM_001256431       | Agap3   | ArfGAP with GTPase domain, ankyrin repeat and   | 24452177  | 24502047  | TC0500000217.mm.1  | 0.0  | 0.397869 |
| TC1000001325.mm.1 | NM_011383          | Six5    | sine oculis-related homeobox 5                  | 19094544  | 19098549  | TC0700000287.mm.1  | 0.1  | 0.398167 |
| TC1000001332.mm.1 | ENSMUST00000104225 | Gm23389 | predicted gene, 23389                           | 94615636  | 94615704  | TC0100002841.mm.1  | -0.1 | 0.398231 |
| TC1000001333.mm.1 | ENSMUST00000118877 | Gm13082 | predicted gene 13082                            | 143671124 | 143671684 | TC04000001833.mm.1 | -0.2 | 0.398246 |
| TC1000001337.mm.1 | XM_894949          | Gm7020  | predicted gene 7020                             | 104573547 | 104573897 | TC1100001729.mm.1  | 0.1  | 0.398447 |
| TC1000001471.mm.1 | ENSMUST00000116879 | Gm23882 | predicted gene, 23882                           | 35952824  | 35952907  | TC1800000321.mm.1  | 0.2  | 0.398451 |
| TC1000001480.mm.1 | XM_001473011       | Gm20813 | predicted gene, 20813                           | 75025392  | 75026075  | TC0Y00000470.mm.1  | 0.1  | 0.398544 |
| TC1000001483.mm.1 | XM_001475119       | Gm20860 | predicted gene, 20860                           | 86434211  | 86434894  | TC0Y00000534.mm.1  | 0.1  | 0.398544 |
| TC1000001489.mm.1 | NM_024195          | Cyb5r4  | cytochrome b5 reductase 4                       | 870722014 | 87077774  | TC09000001123.mm.1 | -0.1 | 0.398563 |
| TC1000001493.mm.1 | NM_019395          | Fbp1    | fructose bisphosphatase 1                       | 62864753  | 62888282  | TC1300002176.mm.1  | 0.4  | 0.398674 |
| TC1000001504.mm.1 | NM_010156          | Samd9l  | sterile alpha motif domain containing 9-like    | 3372257   | 3399571   | TC0600001787.mm.1  | 0.2  | 0.398745 |
| TC1000001506.mm.1 | NM_013812          | Cdk2ap1 | CDK2 (cyclin-dependent kinase 2)-associated pro | 124345417 | 124354671 | TC0500003253.mm.1  | -0.1 | 0.398754 |
| TC1000001510.mm.1 | NM_010477          | Hspd1   | heat shock protein 1 (chaperonin)               | 55077834  | 55088243  | TC0100002354.mm.1  | -0.1 | 0.398827 |
| TC1000001526.mm.1 | NM_001166493       | Rasgrp3 | RAS, guanyl releasing protein 3                 | 75435905  | 75529054  | TC1700001173.mm.1  | 0.3  | 0.398935 |
| TC1000001532.mm.1 | NM_207232          | Ptpdc1  | protein tyrosine phosphatase domain containing  | 48577872  | 48625573  | TC1300001946.mm.1  | 0.0  | 0.398997 |
| TC1000001542.mm.1 | ENSMUST00000104553 | Gm26344 | predicted gene, 26344                           | 116065788 | 116065919 | TC0300002801.mm.1  | 0.1  | 0.399113 |
| TC1000001544.mm.1 | NM_146392          | Olfr720 | olfactory receptor 720                          | 14175095  | 14176117  | TC1400001472.mm.1  | -0.1 | 0.399125 |
| TC1000001546.mm.1 | NR_028061          | Gm8615  | glucosamine-6-phosphate deaminase 1 pseudog     | 149154128 | 149156192 | TC0500003651.mm.1  | -0.1 | 0.399379 |
| TC1000001551.mm.1 | NM_026035          | Mrp155  | mitochondrial ribosomal protein L55             | 59206486  | 59206134  | TC1100000717.mm.1  | 0.1  | 0.399528 |
| TC1000001556.mm.1 | NM_133724          | Bloc1s4 | biogenesis of organelles complex-1, subunit 4,  | 36747374  | 36748679  | TC0500002263.mm.1  | 0.1  | 0.399548 |
| TC1000001575.mm.1 | ENSMUST00000122559 | Gm25325 | predicted gene, 25325                           | 103666542 | 103666627 | TC0300002628.mm.1  | -0.1 | 0.399604 |
| TC1000001576.mm.1 | ENSMUST00000083270 | Gm24610 | predicted gene, 24610                           | 46359036  | 46359144  | TC1900000698.mm.1  | -0.1 | 0.399626 |
| TC1000001580.mm.1 | NR_035430          | Mir1198 | microRNA 1198                                   | 7807101   | 7807221   | TC0X00000071.mm.1  | 0.1  | 0.399796 |
| TC1000001585.mm.1 | ENSMUST00000083410 | Gm25581 | predicted gene, 25581                           | 39259631  | 39259794  | TC0400002425.mm.1  | -0.3 | 0.399806 |
| TC1000001586.mm.1 | NM_001166754       | Vmn1r15 | vomer nasal 1 receptor 157                      | 22761697  | 22762590  | TC0700000344.mm.1  | -0.1 | 0.399849 |
| TC1000001587.mm.1 | ENSMUST00000175216 | Gm26219 | predicted gene, 26219                           | 18361436  | 18361506  | TC1600001315.mm.1  | -0.1 | 0.39995  |
| TC1000001592.mm.1 | ENSMUST00000118414 | Gm14870 | predicted gene 14870                            | 108893496 | 108893651 | TC0X00001098.mm.1  | -0.2 | 0.40003  |
| TC1000001596.mm.1 | ENSMUST00000179254 | Gm22448 | predicted gene, 22448                           | 66254786  | 66254892  | TC1600000801.mm.1  | -0.3 | 0.400113 |
| TC1000001598.mm.1 | ENSMUST00000082988 | Gm22628 | predicted gene, 22628                           | 16041046  | 16041152  | TC1300001492.mm.1  | -0.5 | 0.400223 |
| TC1000001599.mm.1 | ENSMUST00000174956 | Gm22925 | predicted gene, 22925                           | 10510791  | 10510892  | TC0200000190.mm.1  | 0.1  | 0.400237 |
| TC1000001600.mm.1 | ENSMUST00000090195 | Gm11027 | predicted gene 11027                            | 116275386 | 116275612 | TC1200001301.mm.1  | 0.1  | 0.400269 |
| TC1000001601.mm.1 | NM_172842          | Lax1    | lymphocyte transmembrane adaptor 1              | 133679029 | 133690108 | TC0100003094.mm.1  | -0.2 | 0.400489 |
| TC1000001604.mm.1 | NCBI_Gene:780938:p | Ighv8-8 | Ighv8-8 immunoglobulin heavy variable 8-8       | 115294066 | 115567634 | TC1200002634.mm.1  | -0.4 | 0.4008   |
| TC1000001606.mm.1 | XM_983271          | Gm7160  | predicted gene 7160                             | 105979350 | 105990276 | TC0100002890.mm.1  | 0.1  | 0.400866 |
| TC1000001620.mm.1 | NM_010446          | Foxa2   | forkhead box A2                                 | 148042877 | 148046969 | TC0200004802.mm.1  | -0.1 | 0.400867 |
| TC1000001622.mm.1 | ENSMUST00000080066 | Gm7099  | predicted gene 7099                             | 9429546   | 9430099   | TC1200000082.mm.1  | -0.1 | 0.400888 |
| TC1000001624.mm.1 | ENSMUST00000133235 | Gm10130 | predicted gene 10130                            | 150323702 | 150363071 | TC0200002219.mm.1  | -0.1 | 0.400978 |
| TC1000001625.mm.1 | NM_178374          | Snupn   | snurportin 1                                    | 56950878  | 56983206  | TC0900000690.mm.1  | 0.0  | 0.401002 |
| TC1000001626.mm.1 | ENSMUST00000087222 | Gm3695  | predicted gene 3695                             | 81372213  | 81373221  | TC1200002016.mm.1  | -0.1 | 0.401204 |
| TC1000001635.mm.1 | ENSMUST00000163525 | Gm3239  | predicted gene 3239                             | 4664192   | 4670850   | TC1400000030.mm.1  | 0.1  | 0.401308 |
| TC1000001637.mm.1 | NM_026219          | Uqcrcb  | ubiquinol-cytochrome c reductase binding prote  | 66900617  | 66905378  | TC1300002236.mm.1  | 0.3  | 0.401342 |

|                   |                        |         |                                                 |           |           |                    |      |          |
|-------------------|------------------------|---------|-------------------------------------------------|-----------|-----------|--------------------|------|----------|
| TC1000001650.mm.1 | NM_027196              | Pold4   | polymerase (DNA-directed), delta 4              | 4231899   | 4233634   | TC19000000036.mm.1 | 0.2  | 0.401535 |
| TC1000001653.mm.1 | ENSMUST00000104681     | Gm23728 | predicted gene, 23728                           | 69671352  | 69671421  | TC0900000920.mm.1  | 0.2  | 0.401805 |
| TC1000001656.mm.1 | ENSMUST00000119938     | Gm15238 | predicted gene 15238                            | 167776261 | 167777556 | TC0X00001694.mm.1  | 0.0  | 0.401855 |
| TC1000001657.mm.1 | ENSMUST00000178702     | Gm23771 | predicted gene, 23771                           | 29985934  | 29986043  | TC0100000187.mm.1  | -0.1 | 0.401858 |
| TC1000001660.mm.1 | NM_146703              | Olfr144 | olfactory receptor 1447                         | 12900749  | 12901861  | TC1900001173.mm.1  | 0.1  | 0.401893 |
| TC1000001664.mm.1 | NM_001033308           | Themis2 | thymocyte selection associated family member 2  | 132781843 | 132796413 | TC0400003681.mm.1  | 0.2  | 0.402042 |
| TC1000001672.mm.1 | ENSMUST00000083299     | n-R5s60 | nuclear encoded rRNA 5S 60                      | 67489113  | 67489231  | TC1200001855.mm.1  | 0.2  | 0.402109 |
| TC1000001675.mm.1 | ENSMUST00000158253     | Gm25868 | predicted gene, 25868                           | 135165848 | 135165961 | TC0X00001292.mm.1  | 0.1  | 0.402153 |
| TC1000001689.mm.1 | ENSMUST00000157464     | Gm22233 | predicted gene, 22233                           | 135506257 | 135506370 | TC0X00003011.mm.1  | 0.1  | 0.402153 |
| TC1000001694.mm.1 | NR_035517              | Mir2137 | microRNA 2137                                   | 72992079  | 72992144  | TC0X00000671.mm.1  | 0.1  | 0.402239 |
| TC1000001696.mm.1 | NM_025373              | 1110008 | RIKEN cDNA 1110008L16 gene                      | 55299577  | 55382533  | TC1200000464.mm.1  | 0.1  | 0.402286 |
| TC1000001702.mm.1 | NR_028534              | Snord88 | small nucleolar RNA, C/D box 88C                | 44249852  | 44249941  | TC0700000799.mm.1  | -0.1 | 0.402358 |
| TC1000001708.mm.1 | XM_001480506           | Gm4450  | predicted gene 4450                             | 98445674  | 98510567  | TC0300002551.mm.1  | 0.3  | 0.402414 |
| TC1000001717.mm.1 | ENSMUST00000083287     | Gm25793 | predicted gene, 25793                           | 153576488 | 153576594 | TC0X00003208.mm.1  | -0.2 | 0.402441 |
| TC1000001735.mm.1 | NM_175021              | Samd4b  | sterile alpha motif domain containing 4B        | 28399522  | 28436191  | TC0700004642.mm.1  | 0.1  | 0.402539 |
| TC1000001740.mm.1 | NM_028123              | Slc37a3 | solute carrier family 37 (glycerol-3-phosphate  | 39334770  | 39377707  | TC0600002121.mm.1  | 0.1  | 0.402751 |
| TC1000001744.mm.1 | ENSMUST00000158528     | Gm23579 | predicted gene, 23579                           | 69994790  | 69994892  | TC1200001881.mm.1  | -0.3 | 0.402858 |
| TC1000001755.mm.1 | ENSMUST00000157728     | Gm24014 | predicted gene, 24014                           | 57467870  | 57468026  | TC0100000423.mm.1  | -0.1 | 0.403034 |
| TC1000001759.mm.1 | NM_028933              | Fam134c | family with sequence similarity 134, member C   | 101096322 | 101119893 | TC1100003793.mm.1  | -0.1 | 0.403148 |
| TC1000001761.mm.1 | ENSMUST00000101943     | Gm25538 | predicted gene, 25538                           | 12700039  | 12700145  | TC1200000100.mm.1  | -0.2 | 0.403279 |
| TC1000001764.mm.1 | NM_001039202           | Hdh2    | haloacid dehalogenase-like hydrolase domain co  | 76944115  | 76972902  | TC1800001746.mm.1  | 0.1  | 0.403615 |
| TC1000001767.mm.1 | ENSMUST00000082733     | Gm25453 | predicted gene, 25453                           | 86349586  | 86349692  | TC1800000896.mm.1  | -0.2 | 0.403616 |
| TC1000001779.mm.1 | ENSMUST00000083724     | Gm23102 | predicted gene, 23102                           | 94869873  | 94869988  | TC1700002763.mm.1  | -0.1 | 0.403632 |
| TC1000001780.mm.1 | ENSMUST00000182945     | Gm8955  | predicted gene 8955                             | 14428492  | 14435009  | TC0300001664.mm.1  | -0.1 | 0.403641 |
| TC1000001793.mm.1 | ENSMUST00000157082     | Gm22999 | predicted gene, 22999                           | 118726900 | 118726987 | TC0800001416.mm.1  | 0.1  | 0.403823 |
| TC1000001794.mm.1 | NR_030450              | Mir681  | microRNA 681                                    | 69763835  | 69763944  | TC1200001876.mm.1  | -0.1 | 0.403868 |
| TC1000001799.mm.1 | ENSMUST00000163830     | Gm6611  | predicted gene 6611                             | 32923218  | 32924489  | TC1600000455.mm.1  | 0.0  | 0.403873 |
| TC1000001802.mm.1 | ENSMUST00000158598     | Gm25048 | predicted gene, 25048                           | 98423290  | 98423380  | TC1100003676.mm.1  | -0.1 | 0.404033 |
| TC1000001813.mm.1 | XM_984287              | Gm8138  | predicted gene 8138                             | 43410827  | 43416350  | TC1400001857.mm.1  | 0.1  | 0.404422 |
| TC1000001838.mm.1 | NM_134110              | Kcne2   | potassium voltage-gated channel, Isk-related su | 92292389  | 92298133  | TC1600001024.mm.1  | 0.1  | 0.40444  |
| TC1000001846.mm.1 | NM_025809              | Clec14a | C-type lectin domain family 14, member a        | 58264720  | 58269258  | TC1200001810.mm.1  | 0.1  | 0.40449  |
| TC1000001848.mm.1 | ENSMUST00000180655     | Gm5262  | predicted gene 5262                             | 145183894 | 145184889 | TC0100001324.mm.1  | -0.1 | 0.404506 |
| TC1000001853.mm.1 | BC151028               | Polr3c  | polymerase (RNA) III (DNA directed) polypeptide | 96711490  | 96727628  | TC0300002527.mm.1  | -0.1 | 0.404637 |
| TC1000001857.mm.1 | ENSMUST00000179103     | Gm24862 | predicted gene, 24862                           | 59391690  | 59391768  | TC0700003156.mm.1  | -0.1 | 0.40474  |
| TC1000001869.mm.1 | ENSMUST00000179105     | Gm23310 | predicted gene, 23310                           | 59514667  | 59514745  | TC0700003214.mm.1  | -0.1 | 0.40474  |
| TC1000001881.mm.1 | ENSMUST00000179293     | Gm25461 | predicted gene, 25461                           | 59516539  | 59516617  | TC0700003215.mm.1  | -0.1 | 0.40474  |
| TC1000001884.mm.1 | NM_010418              | Herc2   | hect (homologous to the E6-AP (UBE3A) carboxy   | 56050155  | 56231800  | TC0700000936.mm.1  | 0.1  | 0.405017 |
| TC1000001885.mm.1 | NM_001164290           | Cuedc2  | CUE domain containing 2                         | 46329812  | 46338660  | TC1900001600.mm.1  | 0.0  | 0.405099 |
| TC1000001888.mm.1 | ENSMUST00000093736     | Gm23520 | predicted gene, 23520                           | 38798171  | 38798277  | TC1100002541.mm.1  | -0.5 | 0.405157 |
| TC1000001895.mm.1 | NM_016797              | Stx7    | syntaxin 7                                      | 24149317  | 24188959  | TC1000000208.mm.1  | 0.1  | 0.405167 |
| TC1000001902.mm.1 | ENSMUST00000083771     | Gm22829 | predicted gene, 22829                           | 66170401  | 66170506  | TC1000002298.mm.1  | -0.2 | 0.405181 |
| TC1000001909.mm.1 | NM_031373              | Ogfr    | opioid growth factor receptor                   | 180589245 | 180595837 | TC0200002796.mm.1  | -0.1 | 0.405451 |
| TC1000001917.mm.1 | NR_003965              | Gm10653 | ribosomal protein S2 pseudogene                 | 62841477  | 62868000  | TC0900002467.mm.1  | -0.1 | 0.405474 |
| TC1000001919.mm.1 | ENSMUST00000083017     | Gm23412 | predicted gene, 23412                           | 83285804  | 83285910  | TC0400002946.mm.1  | -0.4 | 0.405477 |
| TC1000001926.mm.1 | ENSMUST00000104453     | Gm24987 | predicted gene, 24987                           | 87925431  | 87925564  | TC1800001725.mm.1  | 0.1  | 0.405723 |
| TC1000001928.mm.1 | ENSMUST00000118054     | Gm15666 | predicted gene 15666                            | 105506216 | 105507139 | TC1400002801.mm.1  | 0.0  | 0.405873 |
| TC1000001939.mm.1 | ENSMUST00000083446     | Gm23095 | predicted gene, 23095                           | 33954235  | 33954341  | TC1900000487.mm.1  | -0.5 | 0.40609  |
| TC1000001941.mm.1 | ENSMUST00000157258     | Gm23602 | predicted gene, 23602                           | 100252917 | 100253048 | TC0100002873.mm.1  | -0.1 | 0.406117 |
| TC1000001950.mm.1 | NM_009800              | Car11   | carbonic anhydrase 11                           | 45699843  | 45704682  | TC0700000860.mm.1  | 0.0  | 0.406329 |
| TC1000001951.mm.1 | NM_183035              | Defb34  | defensin beta 34                                | 19123752  | 19126540  | TC0800000176.mm.1  | 0.1  | 0.406335 |
| TC1000001955.mm.1 | NM_026177              | 1200011 | RIKEN cDNA 1200011I18 gene                      | 76086232  | 76110815  | TC1400002439.mm.1  | -0.1 | 0.406372 |
| TC1000001957.mm.1 | ENSMUST00000157507     | Gm22586 | predicted gene, 22586                           | 64161405  | 64161526  | TC0800000670.mm.1  | 0.1  | 0.406399 |
| TC1000001962.mm.1 | NM_001163627           | Fam151b | family with sequence similarity 151, member B   | 92449620  | 92484031  | TC1300002422.mm.1  | 0.0  | 0.406527 |
| TC1000001987.mm.1 | ENSMUST00000169672     | Gm4535  | predicted gene 4535                             | 141406530 | 141407326 | TC0700002050.mm.1  | 0.1  | 0.406548 |
| TC1000001993.mm.1 | ENSMUST00000082570     | Gm24311 | predicted gene, 24311                           | 144013998 | 144014101 | TC0500001744.mm.1  | -0.5 | 0.406693 |
| TC1000001995.mm.1 | NR_030472              | Mir467b | microRNA 467b                                   | 10481248  | 10481320  | TC0200000120.mm.1  | 0.1  | 0.406713 |
| TC1000002000.mm.1 | ENSMUST00000104398     | Gm24377 | predicted gene, 24377                           | 59665654  | 59665784  | TC1200001820.mm.1  | 0.1  | 0.406782 |
| TC1000002003.mm.1 | NR_033803              | 6030408 | RIKEN cDNA 6030408B16 gene                      | 101293212 | 101297426 | TC1500001069.mm.1  | 0.0  | 0.406831 |
| TC1000002006.mm.1 | uc029vkc.1             | LOC4328 | non-coding RNA, oocyte_clustered_small_RNA4     | 104067472 | 104475542 | TC0500002885.mm.1  | 0.2  | 0.406864 |
| TC1000002014.mm.1 | ENSMUST00000182716     | Gm6771  | predicted gene 6771                             | 41345997  | 41346997  | TC1700000820.mm.1  | -0.1 | 0.406882 |
| TC1000002021.mm.1 | NM_175300              | Anapc2  | anaphase promoting complex subunit 2            | 25272466  | 25285916  | TC0200000406.mm.1  | 0.1  | 0.406953 |
| TC1000002028.mm.1 | ENSMUST00000185017     | CR55670 | N/A                                             | 25679415  | 25679520  | TC0X00001975.mm.1  | 0.2  | 0.406977 |
| TC1000002030.mm.1 | NR_037250              | Mir669a | microRNA 669a-4                                 | 10479311  | 10479407  | TC0200000117.mm.1  | -0.1 | 0.407038 |
| TC1000002031.mm.1 | NR_037251 // NR_037253 | Mir669a | microRNA 669a-5 // microRNA 669a-4              | 10481757  | 10481853  | TC0200000122.mm.1  | -0.1 | 0.407038 |
| TC1000002032.mm.1 | NR_037253 // NR_037255 | Mir669a | microRNA 669a-6 // microRNA 669a-4              | 10484192  | 10484288  | TC0200000127.mm.1  | -0.1 | 0.407038 |
| TC1000002035.mm.1 | NR_037255 // NR_037259 | Mir669a | microRNA 669a-7 // microRNA 669a-4              | 10486649  | 10486745  | TC0200000133.mm.1  | -0.1 | 0.407038 |
| TC1000002036.mm.1 | NR_037259 // NR_037260 | Mir669a | microRNA 669a-8 // microRNA 669a-4              | 10491562  | 10491658  | TC0200000145.mm.1  | -0.1 | 0.407038 |
| TC1000002041.mm.1 | NR_037260 // NR_037264 | Mir669a | microRNA 669a-9 // microRNA 669a-4              | 10494024  | 10494120  | TC0200000151.mm.1  | -0.1 | 0.407038 |
| TC1000002042.mm.1 | NR_037264 // NR_037266 | Mir669a | microRNA 669a-10 // microRNA 669a-4             | 10498907  | 10499003  | TC0200000163.mm.1  | -0.1 | 0.407038 |
| TC1000002043.mm.1 | NR_037266 // NR_037268 | Mir669a | microRNA 669a-11 // microRNA 669a-4             | 10501335  | 10501431  | TC0200000169.mm.1  | -0.1 | 0.407038 |
| TC1000002046.mm.1 | NR_037268 // NR_037269 | Mir669a | microRNA 669a-12 // microRNA 669a-4             | 10503787  | 10503883  | TC0200000175.mm.1  | -0.1 | 0.407038 |
| TC1000002050.mm.1 | ENSMUST00000180032     | Gm21980 | predicted gene 21980                            | 42293436  | 42293841  | TC0400002498.mm.1  | 0.1  | 0.407044 |
| TC1000002059.mm.1 | NM_025287              | Spop    | speckle-type POZ protein                        | 95414080  | 95493410  | TC1100001461.mm.1  | 0.1  | 0.407156 |
| TC1000002063.mm.1 | ENSMUST00000159000     | Gm25443 | predicted gene, 25443                           | 11695267  | 11695342  | TC1900000229.mm.1  | -0.4 | 0.407165 |
| TC1000002083.mm.1 | ENSMUST00000168753     | Gm3170  | predicted gene 3170                             | 5738334   | 5739177   | TC1400000049.mm.1  | 0.2  | 0.407226 |
| TC1000002084.mm.1 | ENSMUST00000177002     | Gm24756 | predicted gene, 24756                           | 59337051  | 59337146  | TC1100002849.mm.1  | -0.1 | 0.407233 |
| TC1000002092.mm.1 | NM_001010839           | Taar7f  | trace amine-associated receptor 7F              | 24049482  | 24050652  | TC1000000205.mm.1  | 0.1  | 0.407387 |
| TC1000002093.mm.1 | ENSMUST00000174942     | Gm25747 | predicted gene, 25747                           | 113424645 | 113424722 | TC1200002454.mm.1  | 0.4  | 0.407581 |

|                   |                    |         |                                                 |           |           |                   |      |          |
|-------------------|--------------------|---------|-------------------------------------------------|-----------|-----------|-------------------|------|----------|
| TC1000002102.mm.1 | ENSMUST00000158175 | Gm24075 | predicted gene, 24075                           | 18969762  | 18969833  | TC0100002023.mm.1 | 0.1  | 0.407672 |
| TC1000002106.mm.1 | NM_203492          | Mrgprg  | MAS-related GPR, member G                       | 143763710 | 143766993 | TC0700004596.mm.1 | 0.0  | 0.408185 |
| TC1000002108.mm.1 | ENSMUST00000082488 | Gm22502 | predicted gene, 22502                           | 180698063 | 180698169 | TC0200002798.mm.1 | -0.2 | 0.408259 |
| TC1000002116.mm.1 | NM_007644          | Scarb2  | scavenger receptor class B, member 2            | 92443873  | 92505608  | TC0500002760.mm.1 | 0.1  | 0.408274 |
| TC1000002117.mm.1 | ENSMUST00000102021 | Gm22834 | predicted gene, 22834                           | 59475622  | 59475700  | TC0700003197.mm.1 | -0.1 | 0.408355 |
| TC1000002119.mm.1 | ENSMUST00000120260 | Gm15784 | predicted gene 15784                            | 149361686 | 149363147 | TC0600001772.mm.1 | -0.1 | 0.408407 |
| TC1000002158.mm.1 | NM_013871          | Mapk12  | mitogen-activated protein kinase 12             | 89130584  | 89140703  | TC1500002038.mm.1 | 0.0  | 0.408537 |
| TC1000002160.mm.1 | ENSMUST00000179673 | Gm12424 | predicted gene 12424                            | 47101032  | 47101478  | TC0400000516.mm.1 | 0.3  | 0.408796 |
| TC1000002175.mm.1 | XR_106078          | Gm20253 | predicted gene, 20253                           | 99183168  | 99190371  | TC0100000984.mm.1 | -0.1 | 0.408917 |
| TC1000002181.mm.1 | NM_010644          | Klk1b26 | kallikrein 1-related petidase b26               | 44012678  | 44016969  | TC0700000787.mm.1 | 0.1  | 0.408961 |
| TC1000002182.mm.1 | NM_023764          | Tollip  | toll interacting protein                        | 141874813 | 141918507 | TC0700004548.mm.1 | 0.1  | 0.409475 |
| TC1000002187.mm.1 | ENSMUST00000083215 | n-R5s86 | nuclear encoded rRNA 5S 86                      | 74059339  | 74059457  | TC0900000996.mm.1 | 0.3  | 0.409485 |
| TC1000002208.mm.1 | ENSMUST00000083266 | Gm24613 | predicted gene, 24613                           | 31258933  | 31259062  | TC1200001592.mm.1 | -0.5 | 0.409542 |
| TC1000002220.mm.1 | ENSMUST00000122558 | Gm25321 | predicted gene, 25321                           | 109840588 | 109840689 | TC0800002913.mm.1 | -0.4 | 0.409572 |
| TC1000002224.mm.1 | ENSMUST00000089275 | Gm10233 | predicted pseudogene 10233                      | 66044988  | 66045877  | TC1400000943.mm.1 | 0.2  | 0.409816 |
| TC1000002231.mm.1 | ENSMUST00000103992 | Gm25094 | predicted gene, 25094                           | 93335458  | 93335588  | TC0600002759.mm.1 | 0.1  | 0.409893 |
| TC1000002234.mm.1 | NM_025550          | Psm6d   | proteasome (prosome, macropain) 26S subunit,    | 14112184  | 14120984  | TC1400001471.mm.1 | -0.1 | 0.409934 |
| TC1000002248.mm.1 | ENSMUST00000157200 | Gm22279 | predicted gene, 22279                           | 65525701  | 65525793  | TC0300000527.mm.1 | 0.1  | 0.409942 |
| TC1000002256.mm.1 | ENSMUST00000116905 | Gm24396 | predicted gene, 24396                           | 30769471  | 30769563  | TC1800001106.mm.1 | 0.2  | 0.410438 |
| TC1000002259.mm.1 | ENSMUST00000104441 | Gm23769 | predicted gene, 23769                           | 59225723  | 59225843  | TC1700002362.mm.1 | 0.1  | 0.410507 |
| TC1000002264.mm.1 | ENSMUST00000083373 | Gm23247 | predicted gene, 23247                           | 83521156  | 83521262  | TC1100001254.mm.1 | -0.1 | 0.410512 |
| TC1000002266.mm.1 | ENSMUST00000117094 | Gm11914 | predicted gene 11914                            | 27867149  | 27867655  | TC0400002338.mm.1 | -0.2 | 0.410572 |
| TC1000002268.mm.1 | NM_009467          | Ugt2b5  | UDP glucuronosyltransferase 2 family, polypepti | 87124946  | 87140340  | TC0500002693.mm.1 | 0.1  | 0.410592 |
| TC1000002282.mm.1 | NM_001243908       | Zfp383  | zinc finger protein 383                         | 29908517  | 29916813  | TC0700000539.mm.1 | 0.0  | 0.410702 |
| TC1000002295.mm.1 | NM_026464          | Wdr55   | WD repeat domain 55                             | 36760239  | 36763708  | TC1800000344.mm.1 | -0.1 | 0.411064 |
| TC1000002298.mm.1 | ENSMUST00000121208 | Gm12350 | predicted gene 12350                            | 34485832  | 34486293  | TC0400000303.mm.1 | -0.2 | 0.411084 |
| TC1000002308.mm.1 | ENSMUST00000158527 | Gm22424 | predicted gene, 22424                           | 130071724 | 130071810 | TC0200001966.mm.1 | 0.1  | 0.411378 |
| TC1000002330.mm.1 | XM_356848          | Gm5218  | predicted gene 5218                             | 81499084  | 81512226  | TC1500001923.mm.1 | -0.1 | 0.411389 |
| TC1000002338.mm.1 | ENSMUST00000178598 | Gm9825  | predicted gene 9825                             | 7981829   | 7983430   | TC0600001842.mm.1 | -0.2 | 0.411428 |
| TC1000002358.mm.1 | NM_029571          | Kti12   | KTI12 homolog, chromatin associated (S. cerevis | 108847785 | 108849413 | TC0400001158.mm.1 | -0.1 | 0.411601 |
| TC1000002363.mm.1 | XR_001590          | Atp5c1- | ATP synthase, H+ transporting, mitochondrial F1 | 77668929  | 77670403  | TC1300002348.mm.1 | -0.1 | 0.411681 |
| TC1000002369.mm.1 | NM_001126047       | Sema4c  | sema domain, immunoglobulin domain (Ig), tran   | 36548640  | 36558381  | TC0100002187.mm.1 | 0.0  | 0.411786 |
| TC1000002374.mm.1 | ENSMUST00000175107 | Gm23263 | predicted gene, 23263                           | 137184065 | 137184140 | TC0400001700.mm.1 | -0.1 | 0.411819 |
| TC1000002378.mm.1 | NM_028203          | Wdr89   | WD repeat domain 89                             | 75630594  | 75669537  | TC1200001938.mm.1 | -0.1 | 0.411943 |
| TC1000002380.mm.1 | ENSMUST00000179304 | Gm22510 | predicted gene, 22510                           | 59454855  | 59454933  | TC0700003186.mm.1 | -0.1 | 0.411946 |
| TC1000002381.mm.1 | ENSMUST00000179628 | Gm26390 | predicted gene, 26390                           | 59484948  | 59485026  | TC0700003202.mm.1 | -0.1 | 0.411946 |
| TC1000002383.mm.1 | ENSMUST00000179449 | Gm26336 | predicted gene, 26336                           | 59488689  | 59488767  | TC0700003204.mm.1 | -0.1 | 0.411946 |
| TC1000002385.mm.1 | XM_001478694       | Gm3993  | predicted gene 3993                             | 20071882  | 20092359  | TC1200000172.mm.1 | 0.1  | 0.411999 |
| TC1000002388.mm.1 | ENSMUST00000158382 | Gm23877 | predicted gene, 23877                           | 11014762  | 11014890  | TC0200002950.mm.1 | -0.1 | 0.412094 |
| TC1000002391.mm.1 | NM_016680          | Clasrp  | CLK4-associating serine/arginine rich protein   | 19581043  | 19604468  | TC0700002489.mm.1 | 0.0  | 0.412281 |
| TC1000002394.mm.1 | ENSMUST00000178415 | Gm22131 | predicted gene, 22131                           | 59681055  | 59681148  | TC0700003274.mm.1 | 0.1  | 0.412299 |
| TC1000002398.mm.1 | NM_008248          | Hint1   | histidine triad nucleotide binding protein 1    | 54866383  | 54870501  | TC1100000637.mm.1 | -0.1 | 0.412394 |
| TC1000002399.mm.1 | NM_009507          | Vhl     | von Hippel-Lindau tumor suppressor              | 113623959 | 113631633 | TC0600001257.mm.1 | 0.1  | 0.412417 |
| TC1000002400.mm.1 | ENSMUST00000177732 | Gm26502 | predicted gene, 26502                           | 59756514  | 59756607  | TC0700003301.mm.1 | 0.1  | 0.412424 |
| TC1000002405.mm.1 | ENSMUST00000178931 | Gm23313 | predicted gene, 23313                           | 59759026  | 59759119  | TC0700003302.mm.1 | 0.1  | 0.412424 |
| TC1000002418.mm.1 | ENSMUST00000177977 | Gm23446 | predicted gene, 23446                           | 59766611  | 59766704  | TC0700003305.mm.1 | 0.1  | 0.412424 |
| TC1000002422.mm.1 | ENSMUST00000082416 | mt-Ts2  | mitochondrially encoded tRNA serine 2           | 11613     | 11741     | TC0M00000015.mm.1 | 0.3  | 0.412507 |
| TC1000002426.mm.1 | NM_001198794       | AB12461 | cDNA sequence AB124611                          | 21526176  | 21545333  | TC0900000199.mm.1 | -0.1 | 0.412518 |
| TC1000002427.mm.1 | NM_146469          | Olfr138 | olfactory receptor 1381                         | 49551749  | 49552684  | TC1100000517.mm.1 | 0.1  | 0.41254  |
| TC1000002428.mm.1 | NR_035473          | Mir1950 | microRNA 1950                                   | 34965396  | 34965469  | TC1900000509.mm.1 | 0.1  | 0.412613 |
| TC1000002430.mm.1 | NM_021567          | Pcbp4   | poly(rC) binding protein 4                      | 106453838 | 106464012 | TC0900001349.mm.1 | 0.0  | 0.412857 |
| TC1000002431.mm.1 | ENSMUST00000082452 | Gm26449 | predicted gene, 26449                           | 14878495  | 14878598  | TC1200000118.mm.1 | -0.1 | 0.412909 |
| TC1000002435.mm.1 | NM_007450          | Slc25a4 | solute carrier family 25 (mitochondrial carrier | 46206797  | 46211284  | TC0800002156.mm.1 | 0.1  | 0.412919 |
| TC1000002442.mm.1 | NM_001009550       | Mup21   | major urinary protein 21                        | 62147832  | 62150863  | TC0400004215.mm.1 | -0.2 | 0.412941 |
| TC1000002443.mm.1 | ENSMUST00000119586 | Gm13224 | predicted gene 13224                            | 145404306 | 145404399 | TC0400001860.mm.1 | -0.2 | 0.412975 |
| TC1000002445.mm.1 | NM_001077348       | Plin5   | perilipin 5                                     | 56111601  | 56117596  | TC1700002314.mm.1 | 0.0  | 0.413057 |
| TC1000002451.mm.1 | NR_033611          | Gm12669 | glutaredoxin 3 pseudogene                       | 91805349  | 91806561  | TC0400003047.mm.1 | 0.1  | 0.413097 |
| TC1000002458.mm.1 | ENSMUST00000121466 | Gm8722  | predicted gene 8722                             | 77757378  | 77758146  | TC0X00002503.mm.1 | -0.1 | 0.413289 |
| TC1000002467.mm.1 | ENSMUST00000179407 | Gm22474 | predicted gene, 22474                           | 46232725  | 46232831  | TC1700002169.mm.1 | -0.5 | 0.413465 |
| TC1000002475.mm.1 | ENSMUST00000116762 | Gm26474 | predicted gene, 26474                           | 120287726 | 120287847 | TC0100001334.mm.1 | 0.1  | 0.413498 |
| TC1000002476.mm.1 | NM_019441          | Ppt2    | palmitoyl-protein thioesterase 2                | 34616662  | 34628510  | TC1700002813.mm.1 | 0.0  | 0.413534 |
| TC1000002479.mm.1 | ENSMUST00000182176 | Gm26956 | predicted gene, 26956                           | 11939558  | 11940543  | TC1300000067.mm.1 | -0.1 | 0.413636 |
| TC1000002484.mm.1 | ENSMUST00000104601 | n-R5s26 | nuclear encoded rRNA 5S 26                      | 6147419   | 61475440  | TC1700000051.mm.1 | 0.1  | 0.413966 |
| TC1000002485.mm.1 | NM_001163332       | Cttnbp2 | CTTNBP2 N-terminal like                         | 105001915 | 105053146 | TC0300002665.mm.1 | 0.1  | 0.414318 |
| TC1000002493.mm.1 | ENSMUST00000175414 | Gm25035 | predicted gene, 25035                           | 74586896  | 74586972  | TC0100002587.mm.1 | 0.2  | 0.414383 |
| TC1000002495.mm.1 | NM_011299          | Rps6ka2 | ribosomal protein S6 kinase, polypeptide 2      | 7170115   | 7303316   | TC1700000070.mm.1 | 0.0  | 0.414417 |
| TC1000002498.mm.1 | NCBI_Gene:546244:p | Igkv4-6 | immunoglobulin kappa chain variable 4-61        | 69416893  | 69417425  | TC0600003565.mm.1 | -0.6 | 0.414473 |
| TC1000002499.mm.1 | ENSMUST00000157879 | Gm26490 | predicted gene, 26490                           | 89182981  | 89183120  | TC0400003031.mm.1 | 0.1  | 0.414473 |
| TC1000002504.mm.1 | ENSMUST00000158328 | Gm24942 | predicted gene, 24942                           | 63032706  | 63032819  | TC0100000514.mm.1 | 0.0  | 0.414588 |
| TC1000002505.mm.1 | ENSMUST00000183866 | mmu-mir | mmu-mir-7667                                    | 29595538  | 29595600  | TC1700000507.mm.1 | 0.1  | 0.414653 |
| TC1000002506.mm.1 | NM_007668          | Cdk5    | cyclin-dependent kinase 5                       | 24418241  | 24423530  | TC0500002077.mm.1 | 0.1  | 0.414761 |
| TC1000002509.mm.1 | NM_025475          | Haus2   | HAUS augmin-like complex, subunit 2             | 120609383 | 120621560 | TC0200001797.mm.1 | -0.1 | 0.414777 |
| TC1000002514.mm.1 | NM_001122822       | Wrn     | Werner syndrome homolog (human)                 | 33234373  | 33385527  | TC0800002004.mm.1 | -0.1 | 0.414911 |
| TC1000002516.mm.1 | NM_026378          | Dalrd3  | DALR anticodon binding domain containing 3      | 108569892 | 108572774 | TC0900001416.mm.1 | -0.1 | 0.415128 |
| TC1000002518.mm.1 | NM_178376          | Rraga   | Ras-related GTP binding A                       | 86575668  | 86577285  | TC0400000867.mm.1 | -0.1 | 0.415196 |
| TC1000002522.mm.1 | ENSMUST00000117317 | Gm5187  | predicted gene 5187                             | 107205076 | 107206066 | TC1200002333.mm.1 | -0.1 | 0.41521  |
| TC1000002524.mm.1 | ENSMUST00000067523 | Gm9945  | predicted gene 9945                             | 53480166  | 53481097  | TC1100000606.mm.1 | -0.1 | 0.415456 |
| TC1000002527.mm.1 | NR_027478          | Gm8580  | ribosomal protein L29 pseudogene                | 93665244  | 93665854  | TC1000002697.mm.1 | -0.3 | 0.415549 |

|                   |                    |         |                                                 |           |           |                    |      |          |
|-------------------|--------------------|---------|-------------------------------------------------|-----------|-----------|--------------------|------|----------|
| TC1000002534.mm.1 | BC117079           | Tmem256 | transmembrane protein 256                       | 69838514  | 69839618  | TC1100000925.mm.1  | -0.1 | 0.415678 |
| TC1000002545.mm.1 | ENSMUST00000165619 | Gm3252  | predicted gene 3252                             | 4726775   | 4747493   | TC1400002792.mm.1  | 0.1  | 0.415762 |
| TC1000002551.mm.1 | NM_001164099       | Add3    | adducin 3 (gamma)                               | 53140443  | 53247399  | TC1900000748.mm.1  | 0.2  | 0.416183 |
| TC1000002552.mm.1 | NR_035473          | Mir1950 | microRNA 1950                                   | 40529091  | 40910666  | TC0600002140.mm.1  | 0.3  | 0.416223 |
| TC1000002554.mm.1 | NM_019720          | Cyb561d | cytochrome b-561 domain containing 2            | 107539011 | 107542118 | TC0900003033.mm.1  | -0.1 | 0.416357 |
| TC1000002555.mm.1 | ENSMUST00000083387 | Gm22057 | predicted gene, 22057                           | 138303307 | 138303413 | TC0X00003053.mm.1  | -0.5 | 0.416747 |
| TC1000002556.mm.1 | NM_001081236       | 2410131 | RIKEN cDNA 2410131K14 gene                      | 118245227 | 118266093 | TC0500001308.mm.1  | 0.1  | 0.416803 |
| TC1000002557.mm.1 | ENSMUST00000157820 | Gm23557 | predicted gene, 23557                           | 93573731  | 93573868  | TC0X00002635.mm.1  | -0.1 | 0.416911 |
| TC1000002562.mm.1 | ENSMUST00000158545 | Gm22431 | predicted gene, 22431                           | 56535971  | 56536077  | TC1400000807.mm.1  | 0.1  | 0.416968 |
| TC1000002570.mm.1 | ENSMUST00000175007 | Gm22175 | predicted gene, 22175                           | 113425150 | 113425227 | TC1200002456.mm.1  | 0.5  | 0.416988 |
| TC1000002594.mm.1 | ENSMUST00000104475 | Gm26144 | predicted gene, 26144                           | 56678904  | 56679035  | TC0400002701.mm.1  | 0.1  | 0.417016 |
| TC1000002600.mm.1 | ENSMUST00000087819 | Olfr143 | olfactory receptor 1432                         | 12228615  | 12229544  | TC1900001158.mm.1  | -0.1 | 0.417042 |
| TC1000002605.mm.1 | ENSMUST00000083278 | Gm26264 | predicted gene, 26264                           | 81638311  | 81638469  | TC0600000898.mm.1  | -0.2 | 0.417185 |
| TC1000002607.mm.1 | ENSMUST00000185088 | RP23-51 | N/A                                             | 14529625  | 14530066  | TC0700002386.mm.1  | 0.1  | 0.417198 |
| TC1000002611.mm.1 | NM_010590          | Ajuba   | ajuba LIM protein                               | 54567469  | 54577661  | TC1400002059.mm.1  | -0.1 | 0.417457 |
| TC1000002612.mm.1 | ENSMUST00000083094 | Gm25200 | predicted gene, 25200                           | 118120954 | 118121083 | TC0800001413.mm.1  | -0.1 | 0.417466 |
| TC1000002628.mm.1 | NCBI_Gene:639510:p | Ighv6-5 | immunoglobulin heavy variable V6-5              | 114416596 | 114416895 | TC1200002475.mm.1  | -0.2 | 0.417556 |
| TC1000002631.mm.1 | NM_021604          | Agrn    | agrin                                           | 156165290 | 156197488 | TC0400004170.mm.1  | 0.0  | 0.417597 |
| TC1000002632.mm.1 | ENSMUST00000183429 | AC10921 | N/A                                             | 39431507  | 39431613  | TC0700000702.mm.1  | 0.3  | 0.417784 |
| TC1000002639.mm.1 | ENSMUST00000083438 | Gm22741 | predicted gene, 22741                           | 20745308  | 20745472  | TC1600000293.mm.1  | 0.1  | 0.417871 |
| TC1000002642.mm.1 | NM_017372          | Ly2z    | lysozyme 2                                      | 117277333 | 117282274 | TC1000002929.mm.1  | 0.4  | 0.417909 |
| TC1000002648.mm.1 | NM_001163064       | AU04113 | expressed sequence AU041133                     | 82128303  | 82153065  | TC1000000919.mm.1  | -0.1 | 0.418175 |
| TC1000002650.mm.1 | NM_178741          | Klhl8   | kelch-like 8                                    | 103861973 | 103911259 | TC0500002879.mm.1  | 0.0  | 0.418245 |
| TC1000002657.mm.1 | NM_011399          | Slc25a1 | solute carrier family 25 (mitochondrial carrier | 81318916  | 81360767  | TC1500001919.mm.1  | 0.1  | 0.418357 |
| TC1000002660.mm.1 | ENSMUST00000104421 | Gm25795 | predicted gene, 25795                           | 157299490 | 157299621 | TC0X00003247.mm.1  | 0.2  | 0.418587 |
| TC1000002662.mm.1 | NM_144785          | Slc22a1 | solute carrier family 22 (organic anion transpo | 7673061   | 7711310   | TC1900001053.mm.1  | 0.2  | 0.418682 |
| TC1000002671.mm.1 | NM_008508          | Lor     | loricrin                                        | 92080271  | 92083142  | TC0300002382.mm.1  | -0.2 | 0.419069 |
| TC1000002687.mm.1 | NM_020011          | Sphk2   | sphingosine kinase 2                            | 45709463  | 45718002  | TC0700003017.mm.1  | 0.0  | 0.419143 |
| TC1000002696.mm.1 | ENSMUST00000104518 | n-R5s72 | nuclear encoded rRNA 5S 72                      | 90185009  | 90185127  | TC1100003527.mm.1  | 0.1  | 0.419309 |
| TC1000002697.mm.1 | NM_001122820       | Ap3m2   | adaptor-related protein complex 3, mu 2 subuni  | 22787354  | 22805654  | TC0800001875.mm.1  | 0.1  | 0.419613 |
| TC1000002703.mm.1 | NM_001159645       | Araf    | v-raf murine sarcoma 3611 viral oncogene homc   | 20797814  | 20860521  | TC0X00000216.mm.1  | 0.1  | 0.419666 |
| TC1000002721.mm.1 | ENSMUST00000162990 | Gm10171 | predicted gene 10171                            | 172144272 | 172144901 | TC0100003562.mm.1  | 0.2  | 0.420094 |
| TC1000002729.mm.1 | NM_026655          | 2310057 | RIKEN cDNA 2310057M21 gene                      | 131342718 | 131362706 | TC0700004397.mm.1  | -0.1 | 0.420094 |
| TC1000002731.mm.1 | NM_011669          | Usp12   | ubiquitin specific peptidase 12                 | 146734809 | 146795006 | TC0500003615.mm.1  | 0.0  | 0.420199 |
| TC1000002745.mm.1 | NM_020275          | Tnfrsf1 | tumor necrosis factor receptor superfamily, men | 69767472  | 69784411  | TC1400000986.mm.1  | 0.1  | 0.420433 |
| TC1000002759.mm.1 | NM_177646          | Dgk1    | diacylglycerol kinase, delta                    | 87853287  | 87944489  | TC0100000829.mm.1  | -0.1 | 0.420652 |
| TC1000002774.mm.1 | NM_001042699       | Syne3   | spectrin repeat containing, nuclear envelope fa | 104929933 | 105009809 | TC1200002299.mm.1  | 0.0  | 0.420677 |
| TC1000002789.mm.1 | ENSMUST00000178332 | Gm21882 | predicted gene, 21882                           | 40380441  | 40381523  | TC0Y00000326.mm.1  | -0.1 | 0.420702 |
| TC1000002791.mm.1 | NM_001013371       | Dtx3l   | deltex 3-like (Drosophila)                      | 35926511  | 35939151  | TC1600001557.mm.1  | -0.1 | 0.42078  |
| TC1000002793.mm.1 | ENSMUST00000135240 | Gm15409 | predicted gene 15409                            | 148959278 | 148961712 | TC0500001832.mm.1  | -0.1 | 0.420796 |
| TC1000002801.mm.1 | NM_001201389       | Gm11128 | predicted gene 11128                            | 85808044  | 85810040  | TC06000003599.mm.1 | 0.2  | 0.420836 |
| TC1000002807.mm.1 | ENSMUST00000167348 | Gm17678 | predicted gene, 17678                           | 133701639 | 133701881 | TC0100003095.mm.1  | -0.2 | 0.420887 |
| TC1000002809.mm.1 | NM_007600          | Capn1   | calpain 1                                       | 5988545   | 6015825   | TC1900000995.mm.1  | -0.1 | 0.421254 |
| TC1000002822.mm.1 | ENSMUST00000170967 | Rb1     | retinoblastoma 1                                | 73238546  | 73239786  | TC1400002387.mm.1  | -0.1 | 0.421306 |
| TC1000002845.mm.1 | ENSMUST00000121643 | Gm7618  | predicted pseudogene 7618                       | 148900968 | 148901138 | TC0600003472.mm.1  | -0.4 | 0.421307 |
| TC1000002886.mm.1 | NM_026183          | Slc47a1 | solute carrier family 47, member 1              | 61343400  | 61378345  | TC0100002909.mm.1  | 0.2  | 0.421325 |
| TC1000002897.mm.1 | ENSMUST00000075723 | Gm13493 | predicted gene 13493                            | 51871124  | 51871618  | TC0200003524.mm.1  | -0.1 | 0.421338 |
| TC1000002900.mm.1 | NM_001142655       | Arpp19  | cAMP-regulated phosphoprotein 19                | 75037614  | 75060313  | TC0900001008.mm.1  | 0.0  | 0.421526 |
| TC1000002909.mm.1 | ENSMUST00000179019 | n-R5s11 | nuclear encoded rRNA 5S 115                     | 123564286 | 123564404 | TC08000003119.mm.1 | -0.4 | 0.421567 |
| TC1000002916.mm.1 | ENSMUST00000158605 | Gm22203 | predicted gene, 22203                           | 38176614  | 38176671  | TC0700002877.mm.1  | 0.1  | 0.421815 |
| TC1000002920.mm.1 | NM_023312          | Ndufa13 | NADH dehydrogenase (ubiquinone) 1 alpha subc    | 69894180  | 69902558  | TC0800002376.mm.1  | 0.1  | 0.42192  |
| TC1000002921.mm.1 | ENSMUST00000158123 | Gm23219 | predicted gene, 23219                           | 78824387  | 78824473  | TC1100001168.mm.1  | 0.2  | 0.421973 |
| TC1000002924.mm.1 | ENSMUST00000104073 | Gm24431 | predicted gene, 24431                           | 106990402 | 106990467 | TC1300002620.mm.1  | 0.2  | 0.422263 |
| TC1000002926.mm.1 | NM_011449          | Spa17   | sperm autoantigenic protein 17                  | 37603292  | 37613720  | TC0900002053.mm.1  | 0.1  | 0.422277 |
| TC1000002929.mm.1 | ENSMUST00000116899 | Gm22715 | predicted gene, 22715                           | 102487199 | 102487291 | TC0800002782.mm.1  | 0.1  | 0.422304 |
| TC1000002930.mm.1 | ENSMUST00000082776 | Gm22950 | predicted gene, 22950                           | 171733299 | 171733405 | TC0100003554.mm.1  | -0.4 | 0.422342 |
| TC1000002939.mm.1 | NM_008918          | Ppy     | pancreatic polypeptide                          | 102099930 | 102101319 | TC1100003822.mm.1  | -0.1 | 0.422518 |
| TC1000002943.mm.1 | ENSMUST00000177749 | Gm21912 | predicted gene, 21912                           | 54489128  | 54489811  | TC0Y00000382.mm.1  | 0.1  | 0.422641 |
| TC1000002944.mm.1 | ENSMUST00000177558 | Gm21819 | predicted gene, 21819                           | 56323637  | 56324320  | TC0Y00000391.mm.1  | 0.1  | 0.422641 |
| TC1000002985.mm.1 | ENSMUST00000157617 | Gm25913 | predicted gene, 25913                           | 31858458  | 31858592  | TC0400002074.mm.1  | -0.1 | 0.422707 |
| TC1000002986.mm.1 | ENSMUST00000182835 | Gm5839  | predicted gene 5839                             | 48626704  | 48627710  | TC1800000500.mm.1  | -0.1 | 0.422954 |
| TC1000002987.mm.1 | ENSMUST00000078739 | Gm17383 | predicted gene, 17383                           | 82338774  | 82339816  | TC1800000867.mm.1  | 0.1  | 0.423048 |
| TC1000002988.mm.1 | ENSMUST00000091776 | Bhmt    | betaine-homocysteine methyltransferase          | 87756286  | 87758143  | TC1800000904.mm.1  | -0.1 | 0.423136 |
| TC1000002989.mm.1 | NM_018793          | Tyk2    | tyrosine kinase 2                               | 21104068  | 21131275  | TC0900001858.mm.1  | -0.1 | 0.423241 |
| TC1000002990.mm.1 | ENSMUST00000116947 | Gm22033 | predicted gene, 22033                           | 126377139 | 126377231 | TC0400001462.mm.1  | 0.2  | 0.423247 |
| TC1000002998.mm.1 | NR_030150          | Mir466  | microRNA 466                                    | 10507918  | 10507990  | TC0200000182.mm.1  | 0.1  | 0.423273 |
| TC1000003007.mm.1 | ENSMUST00000179335 | Gm23694 | predicted gene, 23694                           | 70027982  | 70028091  | TC0600002447.mm.1  | -0.1 | 0.423301 |
| TC1000003018.mm.1 | NM_021888          | Qtrt1   | queuine tRNA-ribosyltransferase 1               | 21411837  | 21420279  | TC0900000196.mm.1  | 0.0  | 0.423554 |
| TC1000003019.mm.1 | NM_001163672       | Mapk9   | mitogen-activated protein kinase 9              | 49846751  | 49886421  | TC1100000527.mm.1  | 0.1  | 0.423582 |
| TC1000003026.mm.1 | NM_025903          | Ifrd2   | interferon-related developmental regulator 2    | 107587718 | 107593038 | TC0900001377.mm.1  | 0.0  | 0.4236   |
| TC1000003036.mm.1 | ENSMUST00000157478 | Gm23993 | predicted gene, 23993                           | 8242723   | 8242866   | TC0500000047.mm.1  | -0.1 | 0.423626 |
| TC1000003047.mm.1 | ENSMUST00000157415 | Gm23329 | predicted gene, 23329                           | 60807739  | 60807846  | TC0800002287.mm.1  | 0.1  | 0.423864 |
| TC1000003049.mm.1 | NM_010170          | F2r12   | coagulation factor II (thrombin) receptor-like  | 95696853  | 95702768  | TC1300001081.mm.1  | 0.1  | 0.423925 |
| TC1000003078.mm.1 | ENSMUST00000108743 | Gm10999 | predicted gene 10999                            | 129129097 | 129131661 | TC0800003213.mm.1  | 0.1  | 0.423974 |
| TC1000003087.mm.1 | ENSMUST00000157958 | Gm22965 | predicted gene, 22965                           | 122506789 | 122506889 | TC0500001396.mm.1  | 0.1  | 0.424028 |
| TC1000003089.mm.1 | NM_177838          | Fam163a | family with sequence similarity 163, member A   | 156075956 | 156205026 | TC0100003315.mm.1  | 0.0  | 0.424065 |
| TC1000003090.mm.1 | ENSMUST00000157283 | Gm22034 | predicted gene, 22034                           | 102953415 | 102953548 | TC0100002877.mm.1  | -0.1 | 0.424108 |
| TC1000003096.mm.1 | ENSMUST00000180275 | Gm24518 | predicted gene, 24518                           | 59728681  | 59728774  | TC0700003290.mm.1  | 0.1  | 0.424217 |

|                   |                    |         |                                                 |           |           |                    |      |          |
|-------------------|--------------------|---------|-------------------------------------------------|-----------|-----------|--------------------|------|----------|
| TC1000003103.mm.1 | NR_035496          | Mir1946 | microRNA 1946b                                  | 96080596  | 96148402  | TC0300000922.mm.1  | 0.2  | 0.424246 |
| TC1000003105.mm.1 | ENSMUST00000104306 | Gm23595 | predicted gene, 23595                           | 107164977 | 107165106 | TC0900001362.mm.1  | 0.1  | 0.424266 |
| TC1000003112.mm.1 | ENSMUST00000121030 | Gm12804 | predicted gene 12804                            | 111290118 | 111291116 | TC0400001184.mm.1  | -0.1 | 0.424635 |
| TC1000003117.mm.1 | NM_023860          | Krtap5- | keratin associated protein 5-3                  | 142201364 | 142203015 | TC0700002069.mm.1  | -0.1 | 0.424654 |
| TC1000003120.mm.1 | ENSMUST00000184969 | Gm20624 | predicted gene 20624                            | 15319972  | 15320260  | TC0700002404.mm.1  | -0.1 | 0.424744 |
| TC1000003123.mm.1 | NM_011507          | Suc1g2  | succinate-Coenzyme A ligase, GDP-forming, beta  | 95473009  | 95718846  | TC0600002783.mm.1  | 0.1  | 0.424786 |
| TC1000003132.mm.1 | ENSMUST00000184583 | AC14033 | N/A                                             | 38086202  | 38086317  | TC1300000441.mm.1  | -0.1 | 0.42482  |
| TC1000003135.mm.1 | ENSMUST00000175412 | Gm25033 | predicted gene, 25033                           | 35081910  | 35081979  | TC0700000649.mm.1  | 0.3  | 0.424959 |
| TC1000003140.mm.1 | ENSMUST00000116741 | Gm23785 | predicted gene, 23785                           | 29361275  | 29361370  | TC0100002110.mm.1  | 0.1  | 0.425056 |
| TC1000003141.mm.1 | ENSMUST00000104444 | Gm23266 | predicted gene, 23266                           | 71233807  | 71233940  | TC1100003127.mm.1  | 0.0  | 0.425086 |
| TC1000003145.mm.1 | ENSMUST00000082648 | Gm25135 | predicted gene, 25135                           | 43454255  | 43454397  | TC1700000834.mm.1  | 0.1  | 0.425202 |
| TC1000003148.mm.1 | ENSMUST00000178309 | AC13244 | N/A                                             | 32239     | 47294     | TC1_GL456221_rand  | -0.3 | 0.425738 |
| TC1000003152.mm.1 | ENSMUST00000104083 | Gm22781 | predicted gene, 22781                           | 3796447   | 3796583   | TC0400002125.mm.1  | 0.1  | 0.426054 |
| TC1000003153.mm.1 | NM_021334          | Itgax   | integrin alpha X                                | 128129547 | 128150657 | TC0700001876.mm.1  | 0.2  | 0.426063 |
| TC1000003155.mm.1 | NM_153419          | Grwd1   | glutamate-rich WD repeat containing 1           | 45825223  | 45830944  | TC0700003024.mm.1  | 0.0  | 0.426096 |
| TC1000003158.mm.1 | ENSMUST00000118953 | Gm13744 | predicted gene 13744                            | 87559920  | 87560769  | TC0200003985.mm.1  | 0.1  | 0.426449 |
| TC1000003159.mm.1 | NM_199197          | Rbfa    | ribosome binding factor A                       | 80192264  | 80200658  | TC0200001654.mm.1  | -0.1 | 0.426449 |
| TC1000003162.mm.1 | NM_010781          | Tpsb2   | tryptase beta 2                                 | 25366333  | 25368094  | TC1700000374.mm.1  | 0.1  | 0.426702 |
| TC1000003164.mm.1 | NM_009894          | Cideb   | cell death-inducing DNA fragmentation factor, a | 55754045  | 55758458  | TC1400002101.mm.1  | 0.1  | 0.426875 |
| TC1000003169.mm.1 | NM_026423          | Mri1    | methylthioribose-1-phosphate isomerase homol    | 84249906  | 84257326  | TC0800002579.mm.1  | 0.0  | 0.426973 |
| TC1000003171.mm.1 | NM_153159          | Zc3h12a | zinc finger CCHC type containing 12A            | 125118414 | 125127881 | TC0400003522.mm.1  | -0.1 | 0.427022 |
| TC1000003176.mm.1 | NM_133772          | Ssbp4   | single stranded DNA binding protein 4           | 70597490  | 70608872  | TC0800002398.mm.1  | -0.1 | 0.427309 |
| TC1000003182.mm.1 | ENSMUST00000073080 | Cycs    | cytochrome c, somatic                           | 24875686  | 24876634  | TC1900000398.mm.1  | 0.2  | 0.427457 |
| TC1000003183.mm.1 | NM_001145863       | Gm14139 | predicted gene 14139                            | 150181755 | 150193279 | TC0200002213.mm.1  | 0.1  | 0.4275   |
| TC1000003185.mm.1 | NM_027438          | Pnma1   | paraneoplastic antigen MA1                      | 84146131  | 84148489  | TC1200002069.mm.1  | 0.0  | 0.427572 |
| TC1000003191.mm.1 | NM_029269          | Spp2    | secreted phosphoprotein 2                       | 88406961  | 88426438  | TC0100000847.mm.1  | 0.2  | 0.427773 |
| TC1000003211.mm.1 | NM_030712          | Cxcr6   | chemokine (C-X-C motif) receptor 6              | 123806477 | 123811754 | TC0400001672.mm.1  | -0.1 | 0.427798 |
| TC1000003212.mm.1 | NM_030252          | Smim12  | small integral membrane protein 12              | 127243784 | 127247809 | TC0400001487.mm.1  | 0.1  | 0.428136 |
| TC1000003213.mm.1 | NM_198113          | Ssh3    | slingshot homolog 3 (Drosophila)                | 4261668   | 4269172   | TC1900000913.mm.1  | 0.0  | 0.428207 |
| TC1000003214.mm.1 | ENSMUST00000184669 | U6      | U6 spliceosomal RNA                             | 84703262  | 84703362  | TC0200001219.mm.1  | 0.1  | 0.428338 |
| TC1000003218.mm.1 | ENSMUST00000158776 | Gm24880 | predicted gene, 24880                           | 70752416  | 70752500  | TC0700001045.mm.1  | -0.1 | 0.42859  |
| TC1000003220.mm.1 | NM_001085548       | Krtap4- | keratin associated protein 4-9                  | 99785200  | 99786258  | TC1100001600.mm.1  | 0.1  | 0.429132 |
| TC1000003221.mm.1 | NM_016858          | Rab33b  | RAB33B, member of RAS oncogene family           | 51483966  | 51496228  | TC0300000360.mm.1  | -0.1 | 0.429423 |
| TC1000003222.mm.1 | ENSMUST00000082808 | Gm24705 | predicted gene, 24705                           | 54581177  | 54581283  | TC1400000752.mm.1  | -0.2 | 0.429499 |
| TC1000003224.mm.1 | NM_001081316       | Dsel    | dermatan sulfate epimerase-like                 | 111858702 | 111864918 | TC0100002921.mm.1  | 0.1  | 0.429749 |
| TC1000003225.mm.1 | ENSMUST00000120494 | Gm14395 | predicted gene 14395                            | 7535571   | 7536133   | TC0400001775.mm.1  | -0.1 | 0.42975  |
| TC1100000023.mm.1 | NM_001252463       | Mlst8   | MTOR associated protein, LST8 homolog (S. cere  | 24473550  | 24479078  | TC1700001631.mm.1  | -0.1 | 0.429811 |
| TC1100000024.mm.1 | ENSMUST00000178307 | Gm26501 | predicted gene, 26501                           | 95100201  | 95100307  | TC0600002780.mm.1  | -0.5 | 0.429993 |
| TC1100000027.mm.1 | ENSMUST00000083836 | Gm22155 | predicted gene, 22155                           | 6924118   | 6924279   | TC0600001835.mm.1  | -0.3 | 0.430206 |
| TC1100000028.mm.1 | ENSMUST00000180190 | Gm23523 | predicted gene, 23523                           | 170751717 | 170751823 | TC0100003514.mm.1  | -0.4 | 0.430315 |
| TC1100000029.mm.1 | NM_008548          | Man1a   | mannosidase 1, alpha                            | 53904788  | 54075796  | TC1000002175.mm.1  | 0.2  | 0.430441 |
| TC1100000031.mm.1 | ENSMUST00000083216 | Gm22251 | predicted gene, 22251                           | 13209702  | 13209808  | TC1800001003.mm.1  | -0.3 | 0.430468 |
| TC1100000036.mm.1 | NM_026879          | Chmp2b  | charged multivesicular body protein 2B          | 65539129  | 65562726  | TC1600001847.mm.1  | -0.1 | 0.430664 |
| TC1100000039.mm.1 | ENSMUST00000157716 | Gm25465 | predicted gene, 25465                           | 36359218  | 36359322  | TC1600000515.mm.1  | -0.1 | 0.430738 |
| TC1100000045.mm.1 | NM_007763          | Crip1   | cysteine-rich protein 1 (intestinal)            | 113152012 | 113153879 | TC1200001282.mm.1  | -0.2 | 0.430844 |
| TC1100000047.mm.1 | NCBI_Gene:780792;p | Ighv5-1 | immunoglobulin heavy variable 5-15              | 113826646 | 113827121 | TC1200002570.mm.1  | -0.2 | 0.430966 |
| TC1100000049.mm.1 | ENSMUST00000095920 | Gm11360 | predicted gene 11360                            | 27956155  | 27956415  | TC1300000307.mm.1  | -0.1 | 0.431173 |
| TC1100000065.mm.1 | NM_001031667       | Gsk3a   | glycogen synthase kinase 3 alpha                | 25228258  | 25237851  | TC0700002627.mm.1  | -0.1 | 0.431234 |
| TC1100000072.mm.1 | NM_001081237       | Klhl42  | kelch-like 42                                   | 147091075 | 147112778 | TC0600001744.mm.1  | -0.1 | 0.431276 |
| TC1100000081.mm.1 | NM_023175          | Nit2    | nitrilase family, member 2                      | 57156665  | 57167332  | TC1600001757.mm.1  | 0.1  | 0.431371 |
| TC1100000085.mm.1 | NM_009028          | Ras12-9 | RAS-like, family 2, locus 9                     | 5124938   | 5125952   | TC0700002186.mm.1  | -0.1 | 0.43141  |
| TC1100000092.mm.1 | ENSMUST00000082783 | Gm24208 | predicted gene, 24208                           | 13163629  | 13163763  | TC1200001434.mm.1  | -0.2 | 0.431876 |
| TC1100000095.mm.1 | NM_172256          | Dync2li | dynein cytoplasmic 2 light intermediate chain 1 | 84626496  | 84655579  | TC1700001264.mm.1  | 0.1  | 0.431883 |
| TC1100000098.mm.1 | ENSMUST00000064353 | Gm8174  | predicted gene 8174                             | 10560524  | 10561524  | TC1500001206.mm.1  | -0.1 | 0.432245 |
| TC1100000106.mm.1 | NM_145371          | Eif2b1  | eukaryotic translation initiation factor 2B, su | 124570213 | 124579131 | TC0500003261.mm.1  | -0.1 | 0.432362 |
| TC1100000112.mm.1 | NM_183025          | A430033 | RIKEN cDNA A430033K04 gene                      | 138622859 | 138648917 | TC0500001662.mm.1  | 0.0  | 0.432515 |
| TC1100000129.mm.1 | ENSMUST00000104137 | Gm25833 | predicted gene, 25833                           | 68532744  | 68532876  | TC0600000799.mm.1  | 0.1  | 0.432948 |
| TC1100000140.mm.1 | ENSMUST00000122352 | Gm11953 | predicted gene 11953                            | 3951714   | 3952716   | TC1100000027.mm.1  | 0.1  | 0.432961 |
| TC1100000143.mm.1 | ENSMUST00000175035 | Gm26195 | predicted gene, 26195                           | 9670941   | 9671041   | TC0900001740.mm.1  | 0.2  | 0.433013 |
| TC1100000149.mm.1 | NR_030565          | Mir466b | microRNA 466b-3                                 | 10503565  | 10503645  | TC0200000174.mm.1  | 0.1  | 0.433253 |
| TC1100000151.mm.1 | NM_009466          | Ugdh    | UDP-glucose dehydrogenase                       | 65413202  | 65435946  | TC0500002486.mm.1  | 0.1  | 0.433289 |
| TC1100000152.mm.1 | ENSMUST00000119663 | Gm4760  | predicted gene 4760                             | 143183508 | 143184537 | TC0X00003112.mm.1  | -0.1 | 0.433643 |
| TC1100000158.mm.1 | NR_039578          | Mir5118 | microRNA 5118                                   | 55494731  | 55494797  | TC1600000735.mm.1  | -0.1 | 0.433863 |
| TC1100000176.mm.1 | NR_039578          | Mir5118 | microRNA 5118                                   | 0         | 0         | TSUnmapped0000011  | -0.1 | 0.433863 |
| TC1100000182.mm.1 | NM_028360          | Ttcl9   | tetratricopeptide repeat domain 19              | 62281473  | 62328451  | TC1100000794.mm.1  | 0.1  | 0.433924 |
| TC1100000185.mm.1 | ENSMUST00000119895 | Gm14588 | predicted gene 14588                            | 43473783  | 43473954  | TC0X00002127.mm.1  | -0.1 | 0.433934 |
| TC1100000187.mm.1 | NM_031193          | Ren2    | renin 2 tandem duplication of Ren1              | 133350510 | 133360325 | TC0100001206.mm.1  | 0.1  | 0.433957 |
| TC1100000197.mm.1 | NM_133894          | Ugt2b38 | UDP glucuronosyltransferase 2 family, polypepti | 87409939  | 87424203  | TC0500002696.mm.1  | 0.3  | 0.434166 |
| TC1100000228.mm.1 | NM_025526          | Iscu    | IscU iron-sulfur cluster scaffold homolog (E. c | 113772748 | 113778288 | TC0500001210.mm.1  | 0.1  | 0.434171 |
| TC1100000230.mm.1 | ENSMUST00000158396 | Gm25012 | predicted gene, 25012                           | 40009902  | 40010065  | TC1400000405.mm.1  | 0.1  | 0.434176 |
| TC1100000231.mm.1 | NM_172371          | Slc16a1 | solute carrier family 16 (monocarboxylic acid t | 70216789  | 70220994  | TC1100003086.mm.1  | 0.1  | 0.434269 |
| TC1100000245.mm.1 | NM_211358          | Slc35c1 | solute carrier family 35, member C1             | 92452764  | 92460538  | TC02000004141.mm.1 | 0.0  | 0.434409 |
| TC1100000262.mm.1 | ENSMUST00000122754 | Gm22985 | predicted gene, 22985                           | 88526679  | 88526794  | TC0900002800.mm.1  | 0.1  | 0.434722 |
| TC1100000266.mm.1 | ENSMUST00000122568 | Gm22480 | predicted gene, 22480                           | 49491351  | 49491478  | TC0300000347.mm.1  | -0.2 | 0.434941 |
| TC1100000268.mm.1 | XR_032476          | Gm10693 | predicted pseudogene 10693                      | 3860681   | 3869170   | TC07000002140.mm.1 | 0.0  | 0.434953 |
| TC1100000271.mm.1 | NM_173436          | Cypt2   | cysteine-rich perinuclear theca 2               | 105499772 | 105500639 | TC0X00001059.mm.1  | 0.1  | 0.435295 |
| TC1100000284.mm.1 | ENSMUST00000082645 | Gm25796 | predicted gene, 25796                           | 45817736  | 45817898  | TC0300000339.mm.1  | 0.1  | 0.435318 |
| TC1100000285.mm.1 | NM_001033246       | Ccdc110 | coiled-coil domain containing 110               | 45934619  | 45944145  | TC0800000523.mm.1  | -0.1 | 0.435369 |

|                   |                    |         |                                                 |           |           |                   |      |          |
|-------------------|--------------------|---------|-------------------------------------------------|-----------|-----------|-------------------|------|----------|
| TC1100000292.mm.1 | ENSMUST00000082624 | Gm24620 | predicted gene, 24620                           | 46767520  | 46767649  | TC1300001923.mm.1 | 0.4  | 0.435696 |
| TC1100000306.mm.1 | ENSMUST00000083080 | Gm23509 | predicted gene, 23509                           | 93138030  | 93138189  | TC1400002537.mm.1 | 0.1  | 0.435807 |
| TC1100000307.mm.1 | ENSMUST00000082897 | Gm25698 | predicted gene, 25698                           | 16732605  | 16732711  | TC1100002244.mm.1 | -0.5 | 0.435899 |
| TC1100000312.mm.1 | NM_009556          | Zfp42   | zinc finger protein 42                          | 43295067  | 43307009  | TC0800002130.mm.1 | 0.0  | 0.435922 |
| TC1100000315.mm.1 | NM_001033550       | Lrrc8b  | leucine rich repeat containing 8 family, member | 105415775 | 105486189 | TC0500001038.mm.1 | -0.1 | 0.436021 |
| TC1100000316.mm.1 | ENSMUST00000179007 | Gm23649 | predicted gene, 23649                           | 72987798  | 72987904  | TC1700001148.mm.1 | -0.3 | 0.436058 |
| TC1100000327.mm.1 | NCBI_Gene:636752:p | Igkv4-6 | immunoglobulin kappa variable 4-62              | 69399810  | 69400344  | TC0600003564.mm.1 | -0.7 | 0.436412 |
| TC1100000332.mm.1 | ENSMUST00000157695 | Gm25665 | predicted gene, 25665                           | 18274712  | 18274821  | TC0800001790.mm.1 | 0.1  | 0.436414 |
| TC1100000337.mm.1 | ENSMUST00000179817 | Gm24968 | predicted gene, 24968                           | 71174822  | 71174928  | TC1600001880.mm.1 | -0.3 | 0.436559 |
| TC1100000341.mm.1 | ENSMUST00000083380 | Gm26065 | predicted gene, 26065                           | 20800332  | 20800436  | TC0X00001928.mm.1 | -0.1 | 0.436577 |
| TC1100000343.mm.1 | ENSMUST00000122271 | Gm14646 | predicted gene 14646                            | 58401850  | 58401981  | TC0X00000540.mm.1 | 0.2  | 0.436687 |
| TC1100000356.mm.1 | NM_025755          | Pacrgl  | PARK2 co-regulated-like                         | 48372330  | 48388756  | TC0500000505.mm.1 | 0.0  | 0.436732 |
| TC1100000362.mm.1 | NM_001163833       | Msl3l2  | male-specific lethal 3-like 2 (Drosophila)      | 56106917  | 56116880  | TC1000000492.mm.1 | 0.1  | 0.436791 |
| TC1100000373.mm.1 | NM_010957          | Ogg1    | 8-oxoguanine DNA-glycosylase 1                  | 113326972 | 113335068 | TC0600001246.mm.1 | 0.0  | 0.436837 |
| TC1100000375.mm.1 | NM_207239          | Gtf3c1  | general transcription factor III C 1            | 125640954 | 125707780 | TC0700004261.mm.1 | -0.1 | 0.437439 |
| TC1100000391.mm.1 | NM_008648          | Mup4    | major urinary protein 4                         | 59956804  | 59960710  | TC0400002766.mm.1 | -0.2 | 0.437465 |
| TC1100000396.mm.1 | NM_001164173       | Cpsn1   | cleavage and polyadenylation specific factor 1  | 76595808  | 76607591  | TC1500001782.mm.1 | -0.1 | 0.437523 |
| TC1100000400.mm.1 | NM_009834          | Ccrn4l  | CCR4 carbon catabolite repression 4-like (S. ce | 51224447  | 51251654  | TC0300000354.mm.1 | 0.0  | 0.437903 |
| TC1100000410.mm.1 | BC011101           | Armxc3  | armadillo repeat containing, X-linked 3         | 128039019 | 128042418 | TC0700004353.mm.1 | 0.2  | 0.438088 |
| TC1100000414.mm.1 | ENSMUST00000178825 | Gm24168 | predicted gene, 24168                           | 30942379  | 30942485  | TC1000001950.mm.1 | -0.4 | 0.43888  |
| TC1100000426.mm.1 | ENSMUST00000182336 | Gm5652  | predicted gene 5652                             | 5589617   | 5590624   | TC1200001380.mm.1 | -0.1 | 0.439065 |
| TC1100000427.mm.1 | ENSMUST00000179266 | Gm17048 | predicted gene 17048                            | 5958445   | 5959291   | TC1400000054.mm.1 | 0.2  | 0.439351 |
| TC1100000438.mm.1 | ENSMUST00000157895 | Gm24712 | predicted gene, 24712                           | 130146881 | 130146954 | TC0600001545.mm.1 | -0.1 | 0.439509 |
| TC1100000454.mm.1 | ENSMUST00000178922 | Gm23552 | predicted gene, 23552                           | 130176753 | 130176826 | TC0600001546.mm.1 | -0.1 | 0.439509 |
| TC1100000458.mm.1 | ENSMUST00000178506 | Gm24072 | predicted gene, 24072                           | 130320874 | 130320947 | TC0600001547.mm.1 | -0.1 | 0.439509 |
| TC1100000463.mm.1 | NM_026795          | Tm2d3   | TM2 domain containing 3                         | 65693062  | 65701913  | TC0700004622.mm.1 | -0.1 | 0.439553 |
| TC1100000469.mm.1 | NM_023718          | Slc01a6 | solute carrier organic anion transporter family | 142085761 | 142208521 | TC0600003369.mm.1 | 0.3  | 0.439567 |
| TC1100000482.mm.1 | NM_001033275       | Gxylt1  | glucoside xylosyltransferase 1                  | 93239742  | 93275179  | TC1500002092.mm.1 | 0.0  | 0.439732 |
| TC1100000483.mm.1 | ENSMUST00000104144 | Gm23014 | predicted gene, 23014                           | 83836937  | 83837066  | TC0600002585.mm.1 | 0.1  | 0.439956 |
| TC1100000484.mm.1 | NR_037610          | Pafah1b | platelet-activating factor acetylhydrolase, iso | 74673949  | 74724670  | TC1100003198.mm.1 | -0.1 | 0.440115 |
| TC1100000490.mm.1 | ENSMUST00000083903 | Gm23503 | predicted gene, 23503                           | 63432088  | 63432194  | TC0200003640.mm.1 | -0.2 | 0.440144 |
| TC1100000494.mm.1 | ENSMUST00000103961 | Gm22934 | predicted gene, 22934                           | 82994835  | 82994966  | TC0700001194.mm.1 | 0.2  | 0.440164 |
| TC1100000504.mm.1 | NR_037272          | Mir3089 | microRNA 3089                                   | 30721210  | 30721293  | TC0200000540.mm.1 | -0.1 | 0.440235 |
| TC1100000510.mm.1 | NM_199149          | Ppp1r37 | protein phosphatase 1, regulatory subunit 37    | 19530800  | 19562398  | TC0700002487.mm.1 | 0.1  | 0.440243 |
| TC1100000516.mm.1 | ENSMUST00000179295 | Gm5435  | predicted gene 5435                             | 82495419  | 82496537  | TC1200002034.mm.1 | 0.0  | 0.440353 |
| TC1100000517.mm.1 | ENSMUST00000178398 | Gm24465 | predicted gene, 24465                           | 98049822  | 98049928  | TC0100000973.mm.1 | -0.3 | 0.44045  |
| TC1100000518.mm.1 | NM_133862          | Fgg     | fibrinogen gamma chain                          | 83007859  | 83015053  | TC0300000640.mm.1 | -0.2 | 0.440451 |
| TC1100000519.mm.1 | ENSMUST00000104561 | Gm26341 | predicted gene, 26341                           | 35112198  | 35112331  | TC1000000303.mm.1 | 0.1  | 0.440458 |
| TC1100000524.mm.1 | NM_001082975       | Sdr39u1 | short chain dehydrogenase/reductase family 39l  | 55897285  | 55900232  | TC1400002106.mm.1 | 0.1  | 0.440565 |
| TC1100000527.mm.1 | NM_001024230       | Gm5431  | predicted gene 5431                             | 48887422  | 48902152  | TC1100002642.mm.1 | 0.2  | 0.44066  |
| TC1100000529.mm.1 | NM_016696          | Gpc1    | glypican 1                                      | 92831645  | 92860198  | TC0100000916.mm.1 | 0.1  | 0.440884 |
| TC1100000534.mm.1 | ENSMUST00000177365 | Vmn1r-p | vomerol nasal 1 receptor, pseudogene 15         | 58077173  | 58078082  | TC0600002365.mm.1 | 0.0  | 0.441012 |
| TC1100000543.mm.1 | NM_025559          | Mien1   | migration and invasion enhancer 1               | 98437708  | 98438991  | TC1100003677.mm.1 | 0.1  | 0.441043 |
| TC1100000545.mm.1 | ENSMUST00000179890 | AC13310 | N/A                                             | 66955     | 67326     | TC1_GL456211_rand | -0.2 | 0.441214 |
| TC1100000562.mm.1 | NR_030251          | Mir483  | microRNA 483                                    | 142654924 | 142654996 | TC0700004572.mm.1 | 0.1  | 0.441341 |
| TC1100000563.mm.1 | NM_010018          | Dao     | D-amino acid oxidase                            | 114003703 | 114025676 | TC0500001217.mm.1 | 0.1  | 0.441465 |
| TC1100000574.mm.1 | NM_001012726       | Aym1    | activator of yeast meiotic promoters 1          | 113357294 | 113357821 | TC0500001202.mm.1 | 0.1  | 0.441527 |
| TC1100000582.mm.1 | ENSMUST00000097132 | Atp5l-p | ATP synthase, H+ transporting, mitochondrial F0 | 62476306  | 62476617  | TC0700000963.mm.1 | -0.1 | 0.441692 |
| TC1100000585.mm.1 | ENSMUST00000175487 | Gm25748 | predicted gene, 25748                           | 64396334  | 64396403  | TC0100000533.mm.1 | 0.1  | 0.442017 |
| TC1100000599.mm.1 | NR_033590          | Gm8096  | 3-phosphoglycerate dehydrogenase pseudogene     | 28083194  | 28084853  | TC0800001963.mm.1 | 0.0  | 0.442061 |
| TC1100000600.mm.1 | ENSMUST00000154520 | Gm6569  | predicted gene 6569                             | 73834561  | 73839908  | TC1500000526.mm.1 | -0.1 | 0.442369 |
| TC1100000602.mm.1 | ENSMUST00000183142 | Gm10292 | predicted gene 10292                            | 68333197  | 68333777  | TC0300000559.mm.1 | 0.0  | 0.442525 |
| TC1100000606.mm.1 | ENSMUST00000179358 | Gm25361 | predicted gene, 25361                           | 128402758 | 128402833 | TC1000001604.mm.1 | 0.1  | 0.442627 |
| TC1100000607.mm.1 | NM_013501          | Cryaa   | crystallin, alpha A                             | 31677931  | 31681730  | TC1700000542.mm.1 | 0.0  | 0.442816 |
| TC1100000608.mm.1 | XM_001472176       | Gm20795 | predicted gene, 20795                           | 40806531  | 40807229  | TC0Y00000132.mm.1 | -0.1 | 0.442879 |
| TC1100000610.mm.1 | NM_026305          | Tceb2   | transcription elongation factor B (SIII), polyp | 23824739  | 23829109  | TC1700001606.mm.1 | -0.1 | 0.442958 |
| TC1100000612.mm.1 | ENSMUST00000103883 | mmu-mir | mmu-mir-466e // mmu-mir-466b-8                  | 10476628  | 10476713  | TC0200000110.mm.1 | 0.1  | 0.443002 |
| TC1100000614.mm.1 | ENSMUST00000103910 | mmu-mir | mmu-mir-466e // mmu-mir-466b-8                  | 10479086  | 10479171  | TC0200000116.mm.1 | 0.1  | 0.443002 |
| TC1100000618.mm.1 | ENSMUST00000175429 | Gm23873 | predicted gene, 23873                           | 61750468  | 61750537  | TC0700003377.mm.1 | 0.1  | 0.443022 |
| TC1100000619.mm.1 | NM_001270842       | Gm3558  | predicted gene 3558                             | 7545151   | 7568566   | TC1400002854.mm.1 | 0.1  | 0.443054 |
| TC1100000623.mm.1 | ENSMUST00000177923 | Gm26285 | predicted gene, 26285                           | 139443599 | 139443705 | TC0500001676.mm.1 | -0.5 | 0.443067 |
| TC1100000625.mm.1 | ENSMUST00000157957 | Gm22966 | predicted gene, 22966                           | 148326980 | 148327108 | TC0100003223.mm.1 | -0.1 | 0.443088 |
| TC1100000628.mm.1 | ENSMUST00000103789 | Gm26067 | predicted gene, 26067                           | 25861239  | 25861348  | TC0400000327.mm.1 | -0.1 | 0.443272 |
| TC1100000637.mm.1 | ENSMUST00000082577 | Gm22459 | predicted gene, 22459                           | 53404086  | 53404193  | TC1600001733.mm.1 | -0.2 | 0.443297 |
| TC1100000639.mm.1 | NM_146068          | 2310008 | RIKEN cDNA 2310008H04 gene                      | 15889225  | 16146851  | TC1600001256.mm.1 | 0.0  | 0.443828 |
| TC1100000642.mm.1 | ENSMUST00000119873 | Gm14614 | predicted gene 14614                            | 41685994  | 41686377  | TC0X00002106.mm.1 | -0.1 | 0.444014 |
| TC1100000648.mm.1 | NM_145968          | Tagap   | T cell activation Rho GTPase activating protein | 7926000   | 7934897   | TC1700000077.mm.1 | -0.2 | 0.444017 |
| TC1100000666.mm.1 | NM_172599          | Atg14   | autophagy related 14                            | 47540893  | 47568434  | TC1400001937.mm.1 | 0.0  | 0.444032 |
| TC1100000667.mm.1 | ENSMUST00000116774 | Mir466k | microRNA 466k                                   | 85467377  | 85467498  | TC0300000667.mm.1 | 0.1  | 0.444168 |
| TC1100000668.mm.1 | ENSMUST00000097514 | Gm10530 | predicted gene 10530                            | 159614749 | 159684875 | TC0100001449.mm.1 | 0.1  | 0.444455 |
| TC1100000681.mm.1 | ENSMUST00000082888 | Gm24292 | predicted gene, 24292                           | 7835177   | 7835283   | TC1800000051.mm.1 | -0.4 | 0.444858 |
| TC1100000686.mm.1 | NM_025396          | Pgl5    | 6-phosphogluconolactonase                       | 71592176  | 71596269  | TC0800003228.mm.1 | 0.0  | 0.445031 |
| TC1100000697.mm.1 | NM_172261          | Ppp1r9b | protein phosphatase 1, regulatory subunit 9B    | 94991035  | 95006899  | TC1100001451.mm.1 | 0.1  | 0.445031 |
| TC1100000708.mm.1 | ENSMUST00000180794 | Gm5976  | predicted gene 5976                             | 52503234  | 52504229  | TC0100002321.mm.1 | -0.1 | 0.445563 |
| TC1100000712.mm.1 | ENSMUST00000182150 | Gm5210  | predicted gene 5210                             | 8917798   | 8929171   | TC1500001189.mm.1 | -0.1 | 0.445646 |
| TC1100000715.mm.1 | NR_004419          | Rny1    | RNA, Y1 small cytoplasmic, Ro-associated        | 0         | 0         | TSUnmapped0000018 | -0.3 | 0.445743 |
| TC1100000717.mm.1 | ENSMUST00000158066 | Gm22331 | predicted gene, 22331                           | 112467911 | 112468046 | TC0100001040.mm.1 | 0.2  | 0.445883 |
| TC1100000718.mm.1 | ENSMUST00000174895 | Gm26381 | predicted gene, 26381                           | 41217745  | 41217836  | TC1600000603.mm.1 | -0.4 | 0.445987 |

|                   |                    |         |                                                 |           |           |                   |      |          |
|-------------------|--------------------|---------|-------------------------------------------------|-----------|-----------|-------------------|------|----------|
| TC1100000722.mm.1 | NM_172688          | Map3k7  | mitogen-activated protein kinase kinase kinase  | 31964097  | 32023467  | TC0400000248.mm.1 | -0.1 | 0.44611  |
| TC1100000737.mm.1 | ENSMUST00000117734 | Gm15176 | predicted gene 15176                            | 157604033 | 157604167 | TC0X00003251.mm.1 | -0.1 | 0.446163 |
| TC1100000738.mm.1 | NR_035422          | Mir1191 | microRNA 1191                                   | 76206229  | 76469519  | TC0500002627.mm.1 | -0.3 | 0.446169 |
| TC1100000742.mm.1 | NM_025786          | Rnf186  | ring finger protein 186                         | 138967112 | 138968366 | TC0400001737.mm.1 | -0.1 | 0.446182 |
| TC1100000744.mm.1 | NM_134469          | Fdps    | farnesyl diphosphate synthetase                 | 89093588  | 89101967  | TC0300002334.mm.1 | -0.1 | 0.446329 |
| TC1100000750.mm.1 | ENSMUST00000163885 | Gm3248  | predicted gene 3248                             | 5939225   | 5961745   | TC1400001404.mm.1 | 0.0  | 0.44655  |
| TC1100000756.mm.1 | NM_001033793       | Ubtfl1  | upstream binding transcription factor, RNA poly | 18404418  | 18411502  | TC0900000133.mm.1 | -0.1 | 0.446785 |
| TC1100000759.mm.1 | ENSMUST00000174996 | Gm24022 | predicted gene, 24022                           | 113424749 | 113424818 | TC1200002455.mm.1 | 0.4  | 0.446824 |
| TC1100000761.mm.1 | NM_053238          | Vmn1r25 | vomeronasal 1 receptor 25                       | 57978299  | 57979351  | TC0600002362.mm.1 | -0.1 | 0.446889 |
| TC1100000765.mm.1 | NM_010142          | Ephb2   | Eph receptor B2                                 | 136616183 | 136835988 | TC0400004224.mm.1 | 0.1  | 0.447211 |
| TC1100000767.mm.1 | ENSMUST00000184997 | AC14722 | N/A                                             | 20920214  | 20920320  | TC1500000138.mm.1 | 0.2  | 0.447387 |
| TC1100000774.mm.1 | ENSMUST00000083093 | Gm25201 | predicted gene, 25201                           | 47840816  | 47840985  | TC1700002215.mm.1 | 0.0  | 0.447566 |
| TC1100000778.mm.1 | NM_194345          | Fam160b | family with sequence similarity 160, member B2  | 70583295  | 70599835  | TC1400002345.mm.1 | 0.0  | 0.447656 |
| TC1100000785.mm.1 | NM_019699          | Fads2   | fatty acid desaturase 2                         | 10064102  | 10101503  | TC1900001095.mm.1 | 0.1  | 0.447955 |
| TC1100000794.mm.1 | ENSMUST00000118203 | Gm12197 | predicted gene 12197                            | 50446577  | 50447023  | TC1100000545.mm.1 | 0.2  | 0.448189 |
| TC1100000801.mm.1 | XM_003689105       | Gm21462 | predicted gene, 21462                           | 86869372  | 86870055  | TC0Y00000536.mm.1 | 0.1  | 0.448522 |
| TC1100000804.mm.1 | NM_001080969       | Thg1l   | tRNA-histidine guanylyltransferase 1-like (S. c | 45946843  | 45955494  | TC1100002593.mm.1 | 0.0  | 0.44854  |
| TC1100000805.mm.1 | NM_173430          | Kfrp    | fukutin related protein                         | 16809267  | 16816732  | TC0700002437.mm.1 | -0.1 | 0.448595 |
| TC1100000820.mm.1 | NR_030150          | Mir466  | microRNA 466                                    | 112021430 | 112058438 | TC1400001239.mm.1 | -0.2 | 0.448684 |
| TC1100000838.mm.1 | ENSMUST00000177562 | AC12514 | N/A                                             | 108372    | 113811    | TC1_GL456210_rand | -0.3 | 0.448735 |
| TC1100000839.mm.1 | NM_146487          | Olfr130 | olfactory receptor 130                          | 38067173  | 38068126  | TC1700000794.mm.1 | 0.1  | 0.448867 |
| TC1100000869.mm.1 | NM_029901          | Akr1c21 | aldo-keto reductase family 1, member C21        | 4574075   | 4586543   | TC1300000023.mm.1 | 0.3  | 0.448899 |
| TC1100000885.mm.1 | ENSMUST00000181399 | Gm26571 | predicted gene, 26571                           | 83950690  | 83951355  | TC1200002059.mm.1 | 0.0  | 0.448913 |
| TC1100000887.mm.1 | NM_147069          | Olfr686 | olfactory receptor 686                          | 105203359 | 105204376 | TC0700003972.mm.1 | -0.1 | 0.449246 |
| TC1100000889.mm.1 | NM_026633          | Fam195a | family with sequence similarity 195, member A   | 25863698  | 25868738  | TC1700001677.mm.1 | 0.0  | 0.449503 |
| TC1100000893.mm.1 | NR_030568          | Mir466f | microRNA 466f-3                                 | 75004110  | 75388146  | TC1400002413.mm.1 | 0.2  | 0.449548 |
| TC1100000895.mm.1 | ENSMUST00000121823 | Gm5257  | predicted gene 5257                             | 75636390  | 75637179  | TC0100000668.mm.1 | -0.1 | 0.449662 |
| TC1100000896.mm.1 | ENSMUST00000104492 | Gm22495 | predicted gene, 22495                           | 23147094  | 23147219  | TC1800000178.mm.1 | 0.1  | 0.44969  |
| TC1100000897.mm.1 | ENSMUST00000116817 | Gm22487 | predicted gene, 22487                           | 69699865  | 69699960  | TC0X00002381.mm.1 | 0.1  | 0.449796 |
| TC1100000900.mm.1 | NR_035418          | Mir669h | microRNA 669h                                   | 113586578 | 113614774 | TC1000001320.mm.1 | 0.2  | 0.449884 |
| TC1100000901.mm.1 | NM_173070          | Sprr4   | small proline-rich protein 4                    | 92500263  | 92500493  | TC0300002394.mm.1 | -0.1 | 0.450263 |
| TC1100000910.mm.1 | NM_001039593       | 1700015 | RIKEN cDNA 1700015E13 gene                      | 170308803 | 170312125 | TC0100001569.mm.1 | 0.0  | 0.450472 |
| TC1100000917.mm.1 | ENSMUST00000103964 | Gm24579 | predicted gene, 24579                           | 8402814   | 8402957   | TC1600000087.mm.1 | 0.1  | 0.450508 |
| TC1100000920.mm.1 | XM_001476724       | Gm20896 | predicted gene, 20896                           | 35895525  | 35920106  | TC0Y00000319.mm.1 | -0.1 | 0.450741 |
| TC1100000925.mm.1 | ENSMUST00000175561 | Gm23801 | predicted gene, 23801                           | 29336780  | 29336846  | TC0500002141.mm.1 | 0.2  | 0.450925 |
| TC1100000926.mm.1 | ENSMUST00000178283 | Gm24485 | predicted gene, 24485                           | 129733232 | 129733298 | TC1000001653.mm.1 | 0.2  | 0.450925 |
| TC1100000929.mm.1 | ENSMUST00000175099 | Gm24331 | predicted gene, 24331                           | 84182278  | 84182344  | TC1300000982.mm.1 | 0.2  | 0.450925 |
| TC1100000932.mm.1 | ENSMUST00000082990 | Gm24268 | predicted gene, 24268                           | 155046610 | 155046719 | TC0X00001574.mm.1 | -0.1 | 0.45101  |
| TC1100000945.mm.1 | NM_018820          | Sertad1 | SERTA domain containing 1                       | 27486910  | 27490316  | TC0700000460.mm.1 | 0.0  | 0.451026 |
| TC1100000956.mm.1 | ENSMUST00000083826 | Gm23848 | predicted gene, 23848                           | 49538195  | 49538300  | TC1500000368.mm.1 | 0.1  | 0.451067 |
| TC1100000964.mm.1 | NM_008112          | Gdi2    | guanosine diphosphate (GDP) dissociation inhibi | 3538075   | 3566261   | TC1300000006.mm.1 | 0.2  | 0.451091 |
| TC1100000967.mm.1 | NM_144863          | Wdr36   | WD repeat domain 36                             | 32837225  | 32866420  | TC1800000265.mm.1 | -0.1 | 0.451091 |
| TC1100000988.mm.1 | NM_025864          | Tmem206 | transmembrane protein 206                       | 191325912 | 191352925 | TC0100001844.mm.1 | 0.0  | 0.451113 |
| TC1100000989.mm.1 | ENSMUST00000177640 | Gm25145 | predicted gene, 25145                           | 92061397  | 92061506  | TC0300002381.mm.1 | -0.1 | 0.451232 |
| TC1100001007.mm.1 | OTTMUST00000077949 | AC14780 | ---                                             | 85468233  | 85527161  | TC0100002721.mm.1 | 0.1  | 0.451386 |
| TC1100001008.mm.1 | ENSMUST00000177813 | Gm3348  | predicted gene 3348                             | 5385805   | 5386651   | TC1400000044.mm.1 | 0.2  | 0.451629 |
| TC1100001011.mm.1 | NM_007791          | Csrp1   | cysteine and glycine-rich protein 1             | 135720061 | 135752232 | TC0100001252.mm.1 | -0.1 | 0.45166  |
| TC1100001012.mm.1 | ENSMUST00000082810 | n-R5s92 | nuclear encoded rRNA 5S 92                      | 115626600 | 115626718 | TC0900003191.mm.1 | 0.1  | 0.451683 |
| TC1100001015.mm.1 | ENSMUST00000093672 | Gm24817 | predicted gene, 24817                           | 172843534 | 172843638 | TC0100003579.mm.1 | 0.1  | 0.451791 |
| TC1100001016.mm.1 | NM_146205          | Armc5   | armadillo repeat containing 5                   | 128237357 | 128245100 | TC0700001878.mm.1 | -0.1 | 0.451834 |
| TC1100001018.mm.1 | ENSMUST00000157096 | Gm26280 | predicted gene, 26280                           | 135150666 | 135150766 | TC0100003121.mm.1 | 0.1  | 0.451972 |
| TC1100001027.mm.1 | NM_028195          | Cyth4   | cytohesin 4                                     | 78597047  | 78622019  | TC1500000649.mm.1 | 0.1  | 0.452043 |
| TC1100001042.mm.1 | ENSMUST00000182678 | Gm7191  | predicted gene 7191                             | 97565603  | 97566592  | TC0800002764.mm.1 | -0.1 | 0.452189 |
| TC1100001048.mm.1 | ENSMUST00000082551 | Gm23735 | predicted gene, 23735                           | 72131088  | 72131221  | TC1400001022.mm.1 | 0.1  | 0.4523   |
| TC1100001050.mm.1 | ENSMUST00000104813 | Gm26301 | predicted gene, 26301                           | 102732390 | 102732484 | TC0800002787.mm.1 | 0.1  | 0.452357 |
| TC1100001051.mm.1 | ENSMUST00000104608 | Gm25562 | predicted gene, 25562                           | 52291199  | 52291331  | TC0900000630.mm.1 | 0.1  | 0.452397 |
| TC1100001052.mm.1 | ENSMUST00000141816 | Gm16686 | predicted gene, 16686                           | 88755195  | 88755590  | TC0400003018.mm.1 | -0.1 | 0.452768 |
| TC1100001053.mm.1 | ENSMUST00000120804 | Gm14186 | predicted gene 14186                            | 99718892  | 99719028  | TC1100003732.mm.1 | -0.1 | 0.452775 |
| TC1100001063.mm.1 | ENSMUST00000184911 | AC16141 | N/A                                             | 71119342  | 71119448  | TC0800000780.mm.1 | 0.2  | 0.452799 |
| TC1100001069.mm.1 | NM_013736          | Tceb3   | transcription elongation factor B (SIII), polyp | 136003368 | 136021763 | TC0400003777.mm.1 | 0.1  | 0.452974 |
| TC1100001070.mm.1 | NM_024454          | Rab21   | RAB21, member RAS oncogene family               | 115289862 | 115315591 | TC1000002897.mm.1 | -0.1 | 0.452976 |
| TC1100001071.mm.1 | NM_153403          | Ago1    | argonaute RISC catalytic subunit 1              | 126435012 | 126468583 | TC0400003542.mm.1 | -0.1 | 0.453215 |
| TC1100001073.mm.1 | NM_001025605       | Gm527   | predicted gene 527                              | 64917911  | 64924591  | TC1200000521.mm.1 | -0.1 | 0.453682 |
| TC1100001078.mm.1 | ENSMUST00000175199 | Gm22617 | predicted gene, 22617                           | 36789738  | 36789807  | TC1600000524.mm.1 | 0.4  | 0.453947 |
| TC1100001082.mm.1 | ENSMUST00000175509 | Gm22745 | predicted gene, 22745                           | 94869464  | 94869533  | TC1600001068.mm.1 | 0.4  | 0.453947 |
| TC1100001095.mm.1 | ENSMUST00000175632 | Gm23075 | predicted gene, 23075                           | 35276453  | 35276522  | TC1900001430.mm.1 | 0.4  | 0.453947 |
| TC1100001100.mm.1 | NM_146116          | Tubb4b  | tubulin, beta 4B class IVB                      | 25222158  | 25224702  | TC0200003135.mm.1 | -0.1 | 0.453953 |
| TC1100001102.mm.1 | ENSMUST00000158883 | Gm23473 | predicted gene, 23473                           | 85778812  | 85778927  | TC1100001300.mm.1 | -0.1 | 0.453987 |
| TC1100001106.mm.1 | ENSMUST00000175578 | Gm25467 | predicted gene, 25467                           | 11696615  | 11696858  | TC0800001705.mm.1 | -0.1 | 0.454152 |
| TC1100001108.mm.1 | ENSMUST00000097953 | Gm10576 | predicted gene 10576                            | 101054558 | 101055262 | TC0400003149.mm.1 | 0.3  | 0.454374 |
| TC1100001110.mm.1 | NCBI_Gene:213684:p | Igkv4-7 | immunoglobulin kappa variable 4-79              | 69042972  | 69043505  | TC0600003555.mm.1 | -0.5 | 0.454467 |
| TC1100001111.mm.1 | ENSMUST00000169972 | LOC1010 | disks large homolog 5-like                      | 42291907  | 42297358  | TC1400001827.mm.1 | 0.1  | 0.454485 |
| TC1100001113.mm.1 | NM_008046          | Fst     | folistatin                                      | 114452262 | 114458775 | TC1300002711.mm.1 | 0.0  | 0.454494 |
| TC1100001127.mm.1 | NM_019754          | Tagln3  | transgelin 3                                    | 45711230  | 45724608  | TC1600001663.mm.1 | 0.0  | 0.454503 |
| TC1100001130.mm.1 | ENSMUST00000157901 | Gm26087 | predicted gene, 26087                           | 39981497  | 39981558  | TC0400002432.mm.1 | 0.1  | 0.454505 |
| TC1100001132.mm.1 | NM_198666          | Gm9758  | predicted gene 9758                             | 14910122  | 14914899  | TC0500001972.mm.1 | -0.1 | 0.454519 |
| TC1100001140.mm.1 | ENSMUST00000184747 | U6      | U6 spliceosomal RNA                             | 139588227 | 139588330 | TC0200002088.mm.1 | -0.1 | 0.454604 |
| TC1100001150.mm.1 | NM_178390          | Fam53a  | family with sequence similarity 53, member A    | 33600351  | 33629635  | TC0500002218.mm.1 | 0.0  | 0.454629 |

|                   |                    |         |                                                 |           |           |                    |      |          |
|-------------------|--------------------|---------|-------------------------------------------------|-----------|-----------|--------------------|------|----------|
| TC1100001157.mm.1 | ENSMUST00000098589 | Gm10642 | predicted gene 10642                            | 70656251  | 70657860  | TC0900000942.mm.1  | 0.1  | 0.455036 |
| TC1100001162.mm.1 | NM_172998          | Rnft2   | ring finger protein, transmembrane 2            | 118190736 | 118245116 | TC0500003138.mm.1  | 0.0  | 0.455218 |
| TC1100001165.mm.1 | ENSMUST00000082550 | Gm24091 | predicted gene, 24091                           | 130766331 | 130766413 | TC0400001552.mm.1  | -0.1 | 0.455319 |
| TC1100001168.mm.1 | ENSMUST00000083856 | Gm23711 | predicted gene, 23711                           | 130775741 | 130775823 | TC0400001553.mm.1  | -0.1 | 0.455319 |
| TC1100001184.mm.1 | NR_028420          | Zfp809  | zinc finger protein 809                         | 22225703  | 22243354  | TC0900000216.mm.1  | 0.1  | 0.455384 |
| TC1100001189.mm.1 | NR_030571          | Mir467c | microRNA 467c                                   | 86415844  | 86520291  | TC1100001314.mm.1  | -0.2 | 0.455425 |
| TC1100001191.mm.1 | NM_008061          | G6pc    | glucose-6-phosphatase, catalytic                | 101367561 | 101377903 | TC1100001654.mm.1  | 0.3  | 0.455608 |
| TC1100001192.mm.1 | NM_024237          | Fbln7   | fibulin 7                                       | 128862981 | 128897034 | TC0200001939.mm.1  | 0.0  | 0.455617 |
| TC1100001196.mm.1 | XM_003688798       | Gm13123 | predicted gene 13123                            | 144247184 | 144248785 | TC0400001845.mm.1  | 0.0  | 0.455684 |
| TC1100001206.mm.1 | ENSMUST00000117437 | Gm11874 | predicted gene 11874                            | 16120759  | 16120888  | TC0400000250.mm.1  | -0.1 | 0.455719 |
| TC1100001209.mm.1 | NM_001177470       | Gm7325  | predicted gene 7325                             | 45600967  | 45602102  | TC17000002153.mm.1 | -0.1 | 0.455746 |
| TC1100001220.mm.1 | NM_019752          | Htra2   | Htra serine peptidase 2                         | 83051266  | 83055273  | TC06000002555.mm.1 | -0.1 | 0.455768 |
| TC1100001221.mm.1 | NM_145505          | Fam160b | family with sequence similarity 160, member B1  | 57361009  | 57389594  | TC1900000813.mm.1  | -0.1 | 0.455804 |
| TC1100001223.mm.1 | NR_040408          | Gm7977  | tyrosine 3-monooxygenase/tryptophan 5-monoc     | 48026012  | 48026759  | TC0300001927.mm.1  | 0.1  | 0.455899 |
| TC1100001231.mm.1 | ENSMUST00000174722 | Gm20391 | predicted gene 20391                            | 36237254  | 36237359  | TC17000002013.mm.1 | 0.1  | 0.455951 |
| TC1100001238.mm.1 | ENSMUST00000179870 | Gm22253 | predicted gene, 22253                           | 59600776  | 59600854  | TC07000003260.mm.1 | -0.1 | 0.456194 |
| TC1100001239.mm.1 | NM_008507          | Sh2b3   | SH2B adaptor protein 3                          | 121815488 | 121836859 | TC0500003198.mm.1  | 0.1  | 0.456378 |
| TC1100001244.mm.1 | ENSMUST00000157338 | Gm25394 | predicted gene, 25394                           | 49684301  | 49684433  | TC1300000573.mm.1  | -0.4 | 0.456426 |
| TC1100001245.mm.1 | NM_019484          | Alyref2 | Aly/REF export factor 2                         | 171503478 | 171504750 | TC0100001593.mm.1  | -0.1 | 0.456497 |
| TC1100001254.mm.1 | ENSMUST00000109799 | Hck     | hemopoietic cell kinase                         | 153108468 | 153151441 | TC02000002308.mm.1 | -0.1 | 0.45658  |
| TC1100001264.mm.1 | NM_011727          | Xlr3c   | X-linked lymphocyte-regulated 3C                | 73254540  | 73265390  | TC0X00002424.mm.1  | 0.0  | 0.456613 |
| TC1100001267.mm.1 | ENSMUST00000101953 | Gm23941 | predicted gene, 23941                           | 159916255 | 159916361 | TC03000003206.mm.1 | -0.1 | 0.456716 |
| TC1100001271.mm.1 | NM_010811          | Ndst2   | N-deacetylase/N-sulfotransferase (heparan gluc  | 20723730  | 20734562  | TC1400001550.mm.1  | 0.0  | 0.456747 |
| TC1100001274.mm.1 | NM_001085528       | Gm13271 | predicted gene 13271                            | 88754868  | 88755416  | TC0400000889.mm.1  | 0.0  | 0.456771 |
| TC1100001284.mm.1 | ENSMUST00000116850 | Gm22072 | predicted gene, 22072                           | 10465287  | 10465407  | TC02000000088.mm.1 | -0.1 | 0.456954 |
| TC1100001287.mm.1 | NM_028303          | Pdzd11  | PDZ domain containing 11                        | 100622883 | 100626568 | TC0X00002706.mm.1  | 0.0  | 0.457253 |
| TC1100001289.mm.1 | ENSMUST00000082731 | Gm24460 | predicted gene, 24460                           | 151539700 | 151539805 | TC0X00003181.mm.1  | -0.1 | 0.457332 |
| TC1100001291.mm.1 | ENSMUST00000093745 | Gm25207 | predicted gene, 25207                           | 15685285  | 15685391  | TC0X00001885.mm.1  | -0.1 | 0.457407 |
| TC1100001295.mm.1 | ENSMUST00000157641 | Gm24782 | predicted gene, 24782                           | 27703876  | 27704007  | TC1900001314.mm.1  | -0.1 | 0.457702 |
| TC1100001300.mm.1 | NM_025667          | Tmem222 | transmembrane protein 222                       | 133266045 | 133277792 | TC04000003695.mm.1 | 0.0  | 0.457844 |
| TC1100001302.mm.1 | ENSMUST00000157785 | Gm24240 | predicted gene, 24240                           | 83269971  | 83270105  | TC1700001237.mm.1  | 0.1  | 0.457871 |
| TC1100001314.mm.1 | ENSMUST00000184334 | mmu-mir | mmu-mir-6380                                    | 137783535 | 137783615 | TC03000003007.mm.1 | -0.1 | 0.458126 |
| TC1100001317.mm.1 | NM_182806          | Gpr18   | G protein-coupled receptor 18                   | 121911434 | 121915774 | TC1400002744.mm.1  | -0.3 | 0.458203 |
| TC1100001337.mm.1 | NM_025833          | Baiap2l | BAI1-associated protein 2-like 1                | 144264525 | 144358112 | TC05000003576.mm.1 | -0.1 | 0.458207 |
| TC1100001338.mm.1 | XM_003689092       | Gm21282 | predicted gene, 21282                           | 81203810  | 81204493  | TC0Y00000497.mm.1  | 0.1  | 0.458266 |
| TC1100001349.mm.1 | NM_001099311       | Gm11596 | predicted gene 11596                            | 99792389  | 99793467  | TC11000003737.mm.1 | 0.1  | 0.458285 |
| TC1100001351.mm.1 | ENSMUST00000082609 | Gm22979 | predicted gene, 22979                           | 36169796  | 36169954  | TC1500000261.mm.1  | -0.1 | 0.458328 |
| TC1100001369.mm.1 | NM_130450          | Elov16  | ELOVL family member 6, elongation of long chai  | 129532386 | 129638495 | TC0300001306.mm.1  | 0.2  | 0.458581 |
| TC1100001374.mm.1 | ENSMUST00000104154 | Gm24670 | predicted gene, 24670                           | 19691288  | 19691419  | TC02000003318.mm.1 | 0.0  | 0.458649 |
| TC1100001383.mm.1 | NM_021432          | Nap1l5  | nucleosome assembly protein 1-like 5            | 58905233  | 58907126  | TC06000002380.mm.1 | 0.0  | 0.458703 |
| TC1100001389.mm.1 | NM_007808          | Cycs    | cytochrome c, somatic                           | 50566538  | 50566538  | TC06000002253.mm.1 | 0.1  | 0.458882 |
| TC1100001400.mm.1 | ENSMUST00000119390 | Ldha-ps | lactate dehydrogenase A, pseudogene             | 60134055  | 60135049  | TC0200000908.mm.1  | 0.1  | 0.45904  |
| TC1100001430.mm.1 | NM_001270898       | Gm21293 | predicted gene, 21293                           | 104194042 | 104196522 | TC1000001249.mm.1  | -0.1 | 0.459269 |
| TC1100001431.mm.1 | NM_028956          | Pus10   | pseudouridylyl synthase 10                      | 23665674  | 23732876  | TC1100000245.mm.1  | 0.1  | 0.459361 |
| TC1100001442.mm.1 | NM_010234          | Fos     | FBJ osteosarcoma oncogene                       | 85473890  | 85477273  | TC1200000833.mm.1  | 0.1  | 0.459371 |
| TC1100001447.mm.1 | NCBI_Gene:780802:p | Ighv4-1 | immunoglobulin heavy variable 4-1               | 113948282 | 113948732 | TC12000002577.mm.1 | -0.4 | 0.459544 |
| TC1100001449.mm.1 | NM_001252628       | Cdh16   | cadherin 16                                     | 104601915 | 104624396 | TC08000002806.mm.1 | 0.3  | 0.459555 |
| TC1100001451.mm.1 | NM_001039560       | Gcnt7   | glucosaminyl (N-acetyl) transferase family memt | 172450313 | 172458596 | TC02000005273.mm.1 | 0.0  | 0.459811 |
| TC1100001461.mm.1 | ENSMUST0000011974  | Bdh2    | 3-hydroxybutyrate dehydrogenase, type 2         | 135281221 | 135304426 | TC0300001365.mm.1  | 0.1  | 0.459839 |
| TC1100001470.mm.1 | ENSMUST00000122795 | Gm25291 | predicted gene, 25291                           | 51737779  | 51737922  | TC11000002700.mm.1 | -0.1 | 0.459978 |
| TC1100001473.mm.1 | NM_001177484       | Gm11559 | predicted gene 11559                            | 99864476  | 99865571  | TC1100001605.mm.1  | 0.0  | 0.460009 |
| TC1100001474.mm.1 | XM_003689098       | Gm21380 | predicted gene, 21380                           | 84440144  | 84442478  | TC0Y00000516.mm.1  | 0.1  | 0.460235 |
| TC1100001489.mm.1 | NM_183112          | 1700029 | RIKEN cDNA 170002915 gene                       | 92382918  | 92385708  | TC0200001412.mm.1  | 0.1  | 0.460334 |
| TC1100001491.mm.1 | ENSMUST00000177596 | Gm22716 | predicted gene, 22716                           | 110677124 | 110677230 | TC05000002996.mm.1 | -0.3 | 0.460441 |
| TC1100001495.mm.1 | ENSMUST00000120816 | Gm13328 | predicted gene 13328                            | 20235045  | 20236064  | TC02000003074.mm.1 | -0.1 | 0.460818 |
| TC1100001498.mm.1 | NM_001159502       | Ddx24   | DEAD (Asp-Glu-Ala-Asp) box polypeptide 24       | 103407976 | 103425867 | TC12000002267.mm.1 | 0.1  | 0.460926 |
| TC1100001500.mm.1 | ENSMUST00000180258 | Gm25412 | predicted gene, 25412                           | 61938891  | 61938997  | TC0X00000570.mm.1  | -0.5 | 0.461076 |
| TC1100001503.mm.1 | NM_026534          | Ubxn2b  | UBX domain protein 2B                           | 6191098   | 6221688   | TC04000000036.mm.1 | -0.1 | 0.461324 |
| TC1100001532.mm.1 | NM_206822          | Olfr10  | olfactory receptor 10                           | 49317548  | 49318489  | TC11000005004.mm.1 | 0.0  | 0.461359 |
| TC1100001535.mm.1 | uc029seq.1         | Gm10021 | SubName: Full=Putative uncharacterized protein  | 5454529   | 5460536   | TC14000002857.mm.1 | 0.0  | 0.461406 |
| TC1100001540.mm.1 | ENSMUST00000122524 | Gm25784 | predicted gene, 25784                           | 40879658  | 40879738  | TC0700000718.mm.1  | -0.1 | 0.461531 |
| TC1100001545.mm.1 | NM_010500          | Ier5    | immediate early response 5                      | 155096367 | 155099636 | TC0100003300.mm.1  | -0.1 | 0.461682 |
| TC1100001549.mm.1 | NM_011956          | Nubp2   | nucleotide binding protein 2                    | 24882611  | 24886350  | TC1700001646.mm.1  | -0.1 | 0.461734 |
| TC1100001554.mm.1 | NM_019753          | Cdh17   | cadherin 17                                     | 11758147  | 11817905  | TC04000000093.mm.1 | 0.0  | 0.46174  |
| TC1100001556.mm.1 | NM_009040          | Rdh16   | retinol dehydrogenase 16                        | 127801152 | 127815839 | TC10000003221.mm.1 | 0.2  | 0.461754 |
| TC1100001559.mm.1 | NM_010886          | Ndufa4  | NADH dehydrogenase (ubiquinone) 1 alpha subc    | 11900372  | 11907446  | TC0600001862.mm.1  | 0.2  | 0.461859 |
| TC1100001566.mm.1 | ENSMUST00000184715 | GNAS-AS | GNAS antisense RNA 1 conserved region 1         | 174286608 | 174286671 | TC02000002701.mm.1 | -0.1 | 0.461925 |
| TC1100001570.mm.1 | NM_053197          | Sfxn3   | sideroflexin 3                                  | 45047576  | 45056383  | TC1900000664.mm.1  | 0.1  | 0.461977 |
| TC1100001578.mm.1 | NM_008963          | Ptgd5   | prostaglandin D2 synthase (brain)               | 25466709  | 25470046  | TC02000003151.mm.1 | 0.0  | 0.462032 |
| TC1100001588.mm.1 | NM_026675          | Nudt22  | nudix (nucleoside diphosphate linked moiety X)- | 6993018   | 6996117   | TC1900001029.mm.1  | 0.0  | 0.462229 |
| TC1100001590.mm.1 | ENSMUST00000177871 | Gm23977 | predicted gene, 23977                           | 129897932 | 129898005 | TC0600001541.mm.1  | -0.1 | 0.462326 |
| TC1100001598.mm.1 | NM_028753          | Pop7    | processing of precursor 7, ribonuclease P famil | 137501438 | 137502518 | TC0500003448.mm.1  | 0.0  | 0.4624   |
| TC1100001599.mm.1 | NM_001168386       | Ccdc125 | coiled-coil domain containing 125               | 100669481 | 100697240 | TC1300001140.mm.1  | 0.1  | 0.462428 |
| TC1100001600.mm.1 | ENSMUST00000083321 | Gm23974 | predicted gene, 23974                           | 45746895  | 45747025  | TC0100000348.mm.1  | 0.3  | 0.46263  |
| TC1100001602.mm.1 | XR_104601          | B230369 | RIKEN cDNA B230369F24 gene                      | 178313328 | 178319102 | TC0100003644.mm.1  | 0.0  | 0.462787 |
| TC1100001603.mm.1 | NM_009169          | Shfm1   | split hand/foot malformation (ectrodactyly) typ | 6557294   | 6578658   | TC0600001821.mm.1  | -0.1 | 0.463037 |
| TC1100001605.mm.1 | NM_181072          | Myo1e   | myosin IE                                       | 70207350  | 70400067  | TC0900000927.mm.1  | 0.2  | 0.463102 |
| TC1100001606.mm.1 | NM_026701          | Pbld1   | phenazine biosynthesis-like protein domain cont | 63060713  | 63077962  | TC1000000596.mm.1  | 0.1  | 0.463189 |

|                   |                    |         |                                                 |           |           |                    |      |          |
|-------------------|--------------------|---------|-------------------------------------------------|-----------|-----------|--------------------|------|----------|
| TC1100001607.mm.1 | NM_008645          | Mug1    | murinoglobulin 1                                | 121838541 | 121889057 | TC0600001373.mm.1  | -0.1 | 0.463215 |
| TC1100001611.mm.1 | XM_003689090       | Gm21248 | predicted gene, 21248                           | 79958259  | 79959257  | TC0Y00000491.mm.1  | 0.1  | 0.463434 |
| TC1100001612.mm.1 | ENSMUST00000117815 | Gm16464 | predicted gene, 16464                           | 104501055 | 104502149 | TC0400003948.mm.1  | 0.1  | 0.463444 |
| TC1100001619.mm.1 | NM_028782          | Lonp1   | lon peptidase 1, mitochondrial                  | 56614297  | 56626903  | TC1700002333.mm.1  | 0.1  | 0.463527 |
| TC1100001622.mm.1 | NM_027472          | 5730455 | RIKEN cDNA 5730455P16 gene                      | 80360492  | 80378034  | TC1100003342.mm.1  | 0.1  | 0.463692 |
| TC1100001624.mm.1 | NM_145490          | Zfp959  | zinc finger protein 959                         | 55892093  | 55898932  | TC1700000991.mm.1  | -0.1 | 0.463726 |
| TC1100001638.mm.1 | XR_140445          | Gm19537 | predicted gene, 19537                           | 82282210  | 82285248  | TC0100002668.mm.1  | 0.1  | 0.464048 |
| TC1100001640.mm.1 | ENSMUST00000178746 | Gm25935 | predicted gene, 25935                           | 93246708  | 93246814  | TC1700002751.mm.1  | -0.4 | 0.464096 |
| TC1100001642.mm.1 | ENSMUST00000158044 | Gm25336 | predicted gene, 25336                           | 154080095 | 154080199 | TC0100003289.mm.1  | 0.1  | 0.464127 |
| TC1100001643.mm.1 | NM_009687          | Apex1   | apurinic/aprimidinic endonuclease 1             | 50924949  | 50927188  | TC1400000573.mm.1  | -0.1 | 0.46429  |
| TC1100001646.mm.1 | ENSMUST00000122630 | Gm23661 | predicted gene, 23661                           | 69919095  | 69919181  | TC0500000662.mm.1  | 0.1  | 0.464324 |
| TC1100001649.mm.1 | NM_010116          | Klk1b9  | kallikrein 1-related peptidase b9               | 43976061  | 43980376  | TC0700000785.mm.1  | 0.2  | 0.464377 |
| TC1100001650.mm.1 | ENSMUST00000122520 | Gm22956 | predicted gene, 22956                           | 138219737 | 138219816 | TC0500001647.mm.1  | -0.1 | 0.464544 |
| TC1100001651.mm.1 | NM_177318          | Zfp653  | zinc finger protein 653                         | 22055460  | 22071345  | TC0900001895.mm.1  | 0.0  | 0.464667 |
| TC1100001654.mm.1 | NM_001081422       | Bod1l   | biorientation of chromosomes in cell division 1 | 41787538  | 41844315  | TC0500002306.mm.1  | -0.1 | 0.464742 |
| TC1100001657.mm.1 | NM_001164734       | Mpp6    | membrane protein, palmitoylated 6 (MAGUK p5     | 50110241  | 50198598  | TC0600000591.mm.1  | -0.1 | 0.464887 |
| TC1100001661.mm.1 | NM_028426          | 3110007 | RIKEN cDNA 3110007F17 gene                      | 123103495 | 123188795 | TC0X00001201.mm.1  | 0.0  | 0.464908 |
| TC1100001662.mm.1 | ENSMUST00000116854 | Mir669d | microRNA 669d-2                                 | 10471644  | 10471729  | TC0200000099.mm.1  | 0.1  | 0.46491  |
| TC1100001665.mm.1 | ENSMUST00000180019 | Gm22307 | predicted gene, 22307                           | 4529017   | 4529123   | TC0100000008.mm.1  | -0.4 | 0.46498  |
| TC1100001667.mm.1 | ENSMUST00000083282 | Gm25818 | predicted gene, 25818                           | 53433974  | 53434137  | TC0600000639.mm.1  | -0.4 | 0.46502  |
| TC1100001668.mm.1 | NM_001011808       | Olfr19b | olfactory receptor 198                          | 59201466  | 59202519  | TC1600001795.mm.1  | 0.1  | 0.465045 |
| TC1100001673.mm.1 | NM_001081372       | Ces1b   | carboxylesterase 1B                             | 93056727  | 93080017  | TC0800002700.mm.1  | 0.0  | 0.465309 |
| TC1100001677.mm.1 | ENSMUST00000177928 | Gm23018 | predicted gene, 23018                           | 69561229  | 69561337  | TC1200001867.mm.1  | 0.2  | 0.465532 |
| TC1100001680.mm.1 | NM_145217          | Diras1  | DIRAS family, GTP-binding RAS-like 1            | 81019589  | 81025662  | TC1000002522.mm.1  | 0.0  | 0.46638  |
| TC1100001694.mm.1 | NM_008952          | Pipox   | pipecolic acid oxidase                          | 77880615  | 77894096  | TC1100003276.mm.1  | 0.2  | 0.466559 |
| TC1100001699.mm.1 | ENSMUST00000182201 | Gm5300  | predicted gene, 5300                            | 13055595  | 13056597  | TC0600001871.mm.1  | 0.0  | 0.46665  |
| TC1100001708.mm.1 | ENSMUST00000182555 | Gm8048  | predicted gene, 8048                            | 98153181  | 98154176  | TC0500000946.mm.1  | -0.1 | 0.466829 |
| TC1100001710.mm.1 | ENSMUST00000179790 | Gm25286 | predicted gene, 25286                           | 38613149  | 38613253  | TC0700000696.mm.1  | -0.2 | 0.466932 |
| TC1100001728.mm.1 | ENSMUST00000178612 | Gm25671 | predicted gene, 25671                           | 38928775  | 38928879  | TC0700000698.mm.1  | -0.2 | 0.466932 |
| TC1100001729.mm.1 | BC107324           | Grfin   | galectin-related inter-fiber protein            | 140563119 | 140565071 | TC0500003509.mm.1  | 0.0  | 0.466954 |
| TC1100001742.mm.1 | ENSMUST00000183270 | Gm17799 | predicted gene, 17799                           | 19723312  | 19723978  | TC1600000263.mm.1  | 0.0  | 0.466981 |
| TC1100001757.mm.1 | ENSMUST00000180270 | Ppp2r3d | protein phosphatase 2 (formerly 2A), regulatory | 124422622 | 124424507 | TC0900003318.mm.1  | 0.0  | 0.466999 |
| TC1100001762.mm.1 | NM_023059          | Sigirr  | single immunoglobulin and toll-interleukin 1 re | 141091175 | 141100546 | TC0700004519.mm.1  | 0.0  | 0.467131 |
| TC1100001767.mm.1 | NM_001173500       | G630090 | RIKEN cDNA G630090E17 gene                      | 39946907  | 39986646  | TC1000002032.mm.1  | 0.1  | 0.46726  |
| TC1100001771.mm.1 | ENSMUST00000102245 | Gm23659 | predicted gene, 23659                           | 65432137  | 65432246  | TC1600000792.mm.1  | -0.1 | 0.467286 |
| TC1100001776.mm.1 | ENSMUST00000090488 | Gm10250 | predicted pseudogene, 10250                     | 5120602   | 5121172   | TC1500001153.mm.1  | -0.2 | 0.467491 |
| TC1100001777.mm.1 | ENSMUST00000104140 | Gm25832 | predicted gene, 25832                           | 66866797  | 66866926  | TC0100000570.mm.1  | 0.1  | 0.467568 |
| TC1100001778.mm.1 | NM_001014397       | Gm13154 | predicted gene, 13154                           | 147553277 | 147585201 | TC0400004205.mm.1  | -0.1 | 0.467693 |
| TC1100001783.mm.1 | ENSMUST00000072455 | 4930423 | RIKEN cDNA 4930423O20 gene                      | 70381819  | 70382385  | TC1600001879.mm.1  | 0.2  | 0.468332 |
| TC1100001784.mm.1 | NM_022324          | Sdf2l1  | stromal cell-derived factor 2-like 1            | 17130138  | 17132383  | TC1600001280.mm.1  | -0.1 | 0.468458 |
| TC1100001785.mm.1 | NR_028539          | Snord23 | small nucleolar RNA, C/D box 23                 | 15938762  | 15938870  | TC0700002416.mm.1  | 0.2  | 0.468674 |
| TC1100001794.mm.1 | NM_133928          | Chchd4  | coiled-coil-helix-coiled-coil-helix domain cont | 91464276  | 91473423  | TC0600002728.mm.1  | 0.0  | 0.46876  |
| TC1100001799.mm.1 | NR_030773          | Zfp821  | zinc finger protein 821                         | 109705546 | 109724932 | TC0800001300.mm.1  | -0.1 | 0.468827 |
| TC1100001817.mm.1 | ENSMUST00000082994 | Gm22045 | predicted gene, 22045                           | 96671793  | 96671900  | TC1500000955.mm.1  | -0.2 | 0.468835 |
| TC1100001820.mm.1 | ENSMUST00000102225 | Gm24938 | predicted gene, 24938                           | 42605156  | 42605265  | TC0700002930.mm.1  | 0.1  | 0.468924 |
| TC1100001841.mm.1 | NM_144869          | BC02161 | cDNA sequence BC021614                          | 4057477   | 4059444   | TC1900000898.mm.1  | 0.0  | 0.468941 |
| TC1100001848.mm.1 | ENSMUST00000184058 | RP23-34 | N/A                                             | 14837774  | 14838029  | TC0700002392.mm.1  | -0.1 | 0.468942 |
| TC1100001850.mm.1 | NM_008456          | Klk1b5  | kallikrein 1-related peptidase b5               | 44216474  | 44220703  | TC0700000795.mm.1  | 0.3  | 0.468978 |
| TC1100001856.mm.1 | NM_007994          | Fbp2    | fructose bisphosphatase 2                       | 62836877  | 62858400  | TC1300002175.mm.1  | 0.1  | 0.469156 |
| TC1100001860.mm.1 | NM_010186          | Fcgr1   | Fc receptor, IgG, high affinity I               | 96282909  | 96293969  | TC0300002506.mm.1  | 0.1  | 0.469315 |
| TC1100001863.mm.1 | NM_008637          | Nudt1   | nudix (nucleoside diphosphate linked moiety X)- | 140331860 | 140338137 | TC0500001689.mm.1  | 0.0  | 0.469332 |
| TC1100001874.mm.1 | NM_001009947       | Dock11  | dedicator of cytokinesis 11                     | 35888832  | 36076562  | TC0X00000313.mm.1  | -0.2 | 0.469345 |
| TC1100001886.mm.1 | ENSMUST00000175137 | Gm25642 | predicted gene, 25642                           | 38752062  | 38752127  | TC0X00002090.mm.1  | 0.1  | 0.469363 |
| TC1100001896.mm.1 | NM_001164838       | Lrrfp2  | leucine rich repeat (in FLII) interacting prote | 111118111 | 111225668 | TC0900001483.mm.1  | 0.1  | 0.469435 |
| TC1100001900.mm.1 | ENSMUST00000118889 | Gm15711 | predicted gene, 15711                           | 43312594  | 43313128  | TC1600000629.mm.1  | 0.0  | 0.469624 |
| TC1100001907.mm.1 | NM_001081493       | Cartpt  | CART prepropeptide                              | 99898483  | 99900683  | TC1300002525.mm.1  | 0.0  | 0.469715 |
| TC1100001951.mm.1 | ENSMUST00000104011 | Gm22266 | predicted gene, 22266                           | 104070189 | 104070326 | TC0X00002793.mm.1  | 0.1  | 0.469784 |
| TC1100001956.mm.1 | NM_031367          | Ifi44l  | interferon-induced protein 44 like              | 151758737 | 151762906 | TC03000003134.mm.1 | 0.1  | 0.469892 |
| TC1100001969.mm.1 | NM_174846          | Glyctk  | glycerate kinase                                | 106152857 | 106158138 | TC0900003002.mm.1  | 0.0  | 0.469904 |
| TC1100001988.mm.1 | BC049276           | Sulf1   | sulfatase 1                                     | 12692430  | 12860372  | TC0100000064.mm.1  | 0.1  | 0.470109 |
| TC1100001989.mm.1 | NM_001004143       | Usp22   | ubiquitin specific peptidase 22                 | 61151781  | 61175059  | TC1100002904.mm.1  | -0.1 | 0.470163 |
| TC1100002003.mm.1 | NM_001081103       | Stim2   | stromal interaction molecule 2                  | 53998417  | 54121057  | TC0500000547.mm.1  | 0.1  | 0.470248 |
| TC1100002007.mm.1 | NM_001029982       | Sec23ip | Sec23 interacting protein                       | 128744870 | 128784836 | TC0700001893.mm.1  | -0.1 | 0.470344 |
| TC1100002009.mm.1 | NR_002902          | Snora62 | small nucleolar RNA, H/ACA box 62               | 120130415 | 120130563 | TC0900001598.mm.1  | -0.3 | 0.47035  |
| TC1100002017.mm.1 | ENSMUST00000177797 | Gm23616 | predicted gene, 23616                           | 104297188 | 104297297 | TC0500001022.mm.1  | -0.1 | 0.470408 |
| TC1100002018.mm.1 | NM_011396          | Slc22a5 | solute carrier family 22 (organic cation transp | 53864542  | 53891703  | TC1100002748.mm.1  | 0.1  | 0.470505 |
| TC1100002021.mm.1 | NM_023355          | Timm22  | translocase of inner mitochondrial membrane 2   | 76406952  | 76416312  | TC1100001100.mm.1  | 0.0  | 0.470699 |
| TC1100002024.mm.1 | ENSMUST00000099751 | Olfr127 | olfactory receptor 1271                         | 90265511  | 90266428  | TC0200004086.mm.1  | 0.1  | 0.470818 |
| TC1100002028.mm.1 | NM_001253812       | Elp3    | elongator acetyltransferase complex subunit 3   | 65530446  | 65593112  | TC1400002259.mm.1  | 0.1  | 0.470839 |
| TC1100002029.mm.1 | NM_001166740       | Vmn1r12 | vomeronasal 1 receptor 125                      | 21272179  | 21273102  | TC0700000328.mm.1  | 0.1  | 0.470848 |
| TC1100002044.mm.1 | ENSMUST00000102437 | Gm25992 | predicted gene, 25992                           | 56561301  | 56561409  | TC0800000624.mm.1  | 0.1  | 0.470884 |
| TC1100002045.mm.1 | NM_001039544       | Mup3    | major urinary protein 3                         | 62083476  | 62087342  | TC0400004214.mm.1  | -0.2 | 0.470908 |
| TC1100002046.mm.1 | ENSMUST00000122453 | Gm12017 | predicted gene, 12017                           | 17973788  | 17974790  | TC1100002256.mm.1  | -0.1 | 0.471124 |
| TC1100002047.mm.1 | ENSMUST00000180321 | Lysm1   | LysM, putative peptidoglycan-binding, domain c  | 93927004  | 93929102  | TC1200002166.mm.1  | -0.1 | 0.471155 |
| TC1100002066.mm.1 | NM_183031          | Gpr183  | G protein-coupled receptor 183                  | 121952331 | 121965193 | TC1400002746.mm.1  | -0.2 | 0.471173 |
| TC1100002080.mm.1 | NM_001170489       | Aplf    | aprataxin and PNKP like factor                  | 87628429  | 87672168  | TC0600002658.mm.1  | 0.0  | 0.471242 |
| TC1100002089.mm.1 | ENSMUST00000104771 | Gm24606 | predicted gene, 24606                           | 22449696  | 22449796  | TC1700000293.mm.1  | 0.1  | 0.471322 |
| TC1100002095.mm.1 | NM_001195075       | Klhl3   | kelch-like 3                                    | 58004221  | 58113592  | TC1300002090.mm.1  | 0.0  | 0.471425 |

|                   |                    |         |                                                 |           |           |                   |      |          |
|-------------------|--------------------|---------|-------------------------------------------------|-----------|-----------|-------------------|------|----------|
| TC1100002103.mm.1 | ENSMUST00000175165 | Gm25736 | predicted gene, 25736                           | 51015313  | 51015413  | TC0100000367.mm.1 | 0.2  | 0.471464 |
| TC1100002111.mm.1 | NM_009984          | Ctsl    | cathepsin L                                     | 64363214  | 64370306  | TC1300002204.mm.1 | -0.3 | 0.471494 |
| TC1100002144.mm.1 | NM_207236          | Olfr128 | olfactory receptor 1283                         | 111368591 | 111369616 | TC0200001644.mm.1 | 0.1  | 0.472054 |
| TC1100002153.mm.1 | ENSMUST00000103993 | Gm25093 | predicted gene, 25093                           | 44364085  | 44364216  | TC1500000349.mm.1 | -0.1 | 0.472152 |
| TC1100002163.mm.1 | ENSMUST00000158933 | Gm24174 | predicted gene, 24174                           | 140166535 | 140166645 | TC0600003354.mm.1 | -0.1 | 0.47217  |
| TC1100002170.mm.1 | ENSMUST00000158467 | Gm25654 | predicted gene, 25654                           | 64296437  | 64296524  | TC1300002202.mm.1 | -0.1 | 0.472437 |
| TC1100002182.mm.1 | ENSMUST00000082753 | Gm25811 | predicted gene, 25811                           | 86043394  | 86043494  | TC0400002973.mm.1 | 0.1  | 0.473532 |
| TC1100002187.mm.1 | NM_001081369       | Ccdc153 | coiled-coil domain containing 153               | 44240677  | 44247306  | TC0900000503.mm.1 | 0.0  | 0.473915 |
| TC1100002188.mm.1 | NM_026703          | Ndufa8  | NADH dehydrogenase (ubiquinone) 1 alpha subc    | 36036326  | 36049406  | TC0200003376.mm.1 | 0.2  | 0.473921 |
| TC1100002190.mm.1 | ENSMUST00000043711 | Gm10135 | predicted gene 10135                            | 72965808  | 72974702  | TC0500002583.mm.1 | 0.1  | 0.474204 |
| TC1100002195.mm.1 | ENSMUST00000098689 | Gm6166  | predicted gene 6166                             | 57483913  | 57484585  | TC0900000702.mm.1 | -0.3 | 0.474468 |
| TC1100002200.mm.1 | XM_990932          | Gm8672  | predicted gene 8672                             | 49858694  | 49864130  | TC1300001966.mm.1 | -0.1 | 0.474581 |
| TC1100002202.mm.1 | ENSMUST00000104085 | Gm22779 | predicted gene, 22779                           | 38699706  | 38699812  | TC0500002289.mm.1 | 0.1  | 0.474626 |
| TC1100002206.mm.1 | NM_001024626       | Zfp873  | zinc finger protein 873                         | 82048127  | 82061586  | TC1000000915.mm.1 | -0.1 | 0.47467  |
| TC1100002215.mm.1 | ENSMUST00000183502 | SMCR2_1 | Smith-Magenis syndrome chromosome region, c     | 60099547  | 60099673  | TC1100000744.mm.1 | 0.1  | 0.47509  |
| TC1100002226.mm.1 | NM_001013028       | AI59746 | expressed sequence AI597468                     | 85102627  | 85120618  | TC1000001027.mm.1 | -0.1 | 0.475149 |
| TC1100002231.mm.1 | XM_994638          | 6530409 | RIKEN cDNA 6530409C15 gene                      | 28215555  | 28260862  | TC0600000212.mm.1 | 0.0  | 0.475168 |
| TC1100002234.mm.1 | ENSMUST00000181751 | Gm26825 | predicted gene, 26825                           | 5781530   | 5783636   | TC0500000032.mm.1 | 0.2  | 0.475215 |
| TC1100002241.mm.1 | NR_030601          | Mir466d | microRNA 466d                                   | 5379390   | 5483389   | TC0200000051.mm.1 | 0.1  | 0.475308 |
| TC1100002242.mm.1 | ENSMUST00000103867 | Gm24543 | predicted gene, 24543                           | 9234897   | 9234978   | TC1900001083.mm.1 | -0.1 | 0.475344 |
| TC1100002243.mm.1 | NM_008535          | Lyl1    | lymphoblastoid leukemia 1                       | 84701457  | 84704716  | TC0800000959.mm.1 | 0.1  | 0.475947 |
| TC1100002244.mm.1 | ENSMUST00000168090 | Igkv1-1 | immunoglobulin kappa variable 1-115             | 68161415  | 68161756  | TC0600000794.mm.1 | -0.1 | 0.476436 |
| TC1100002249.mm.1 | ENSMUST00000177964 | Ang-ps3 | angiogenin, ribonuclease A family, pseudogene 3 | 43912992  | 43913424  | TC1400000452.mm.1 | -0.1 | 0.476546 |
| TC1100002250.mm.1 | ENSMUST00000183067 | Gm9358  | predicted gene 9358                             | 138914388 | 138915314 | TC0700001985.mm.1 | -0.1 | 0.476575 |
| TC1100002251.mm.1 | NR_035427          | Mir1195 | microRNA 1195                                   | 70860478  | 70860600  | TC1700002482.mm.1 | -0.1 | 0.476677 |
| TC1100002255.mm.1 | NM_013478          | Azgp1   | alpha-2-glycoprotein 1, zinc                    | 137981521 | 137990233 | TC0500001638.mm.1 | -0.1 | 0.476742 |
| TC1100002256.mm.1 | ENSMUST00000093663 | Gm24164 | predicted gene, 24164                           | 62571036  | 62571139  | TC0600000784.mm.1 | 0.1  | 0.476743 |
| TC1100002258.mm.1 | NM_175450          | Wdr18   | WD repeat domain 18                             | 79960152  | 79969246  | TC1000000830.mm.1 | 0.1  | 0.476929 |
| TC1100002278.mm.1 | NM_138758          | Tmihc   | trimethyllysine hydroxylase, epsilon            | 159647    | 334187    | TCX_GL456233_rand | 0.1  | 0.476939 |
| TC1100002283.mm.1 | NM_146746          | Olfr935 | olfactory receptor 935                          | 38994507  | 38995433  | TC0900002066.mm.1 | 0.1  | 0.477034 |
| TC1100002295.mm.1 | NM_001038995       | Gm4787  | predicted gene 4787                             | 81376991  | 81379486  | TC1200002017.mm.1 | 0.1  | 0.477097 |
| TC1100002301.mm.1 | ENSMUST00000178720 | Gm24097 | predicted gene, 24097                           | 104936651 | 104936757 | TC0500001035.mm.1 | -0.2 | 0.477207 |
| TC1100002303.mm.1 | ENSMUST00000082993 | Gm22043 | predicted gene, 22043                           | 40992693  | 40992850  | TC0300000314.mm.1 | 0.1  | 0.477251 |
| TC1100002317.mm.1 | ENSMUST00000120647 | Gm11839 | predicted gene 11839                            | 12114284  | 12116236  | TC0400000106.mm.1 | -0.1 | 0.477296 |
| TC1100002318.mm.1 | NR_030569          | Mir466g | microRNA 466g                                   | 61317752  | 61358085  | TC1700001045.mm.1 | -0.2 | 0.47739  |
| TC1100002322.mm.1 | ENSMUST00000104745 | Gm24132 | predicted gene, 24132                           | 96656129  | 96656219  | TC0800001155.mm.1 | 0.1  | 0.477481 |
| TC1100002323.mm.1 | ENSMUST00000166016 | Gm17376 | predicted gene, 17376                           | 98745735  | 98745822  | TC0400000988.mm.1 | -0.1 | 0.477608 |
| TC1100002325.mm.1 | NM_016689          | Aqp3    | aquaporin 3                                     | 41092722  | 41098183  | TC0400002456.mm.1 | -0.1 | 0.477667 |
| TC1100002330.mm.1 | ENSMUST00000158326 | Gm24940 | predicted gene, 24940                           | 163402283 | 163402390 | TC0100001489.mm.1 | 0.1  | 0.477705 |
| TC1100002331.mm.1 | NM_183026          | Defb14  | defensin beta 14                                | 19194328  | 19195309  | TC0800000179.mm.1 | 0.1  | 0.477707 |
| TC1100002334.mm.1 | NM_010155          | Erf     | Ets2 repressor factor                           | 25242560  | 25250761  | TC0700002628.mm.1 | 0.0  | 0.477735 |
| TC1100002363.mm.1 | NM_015774          | Ero1l   | ERO1-like (S. cerevisiae)                       | 45283087  | 45318572  | TC1400001898.mm.1 | -0.1 | 0.47785  |
| TC1100002369.mm.1 | ENSMUST00000116306 | Gm14777 | predicted gene 14777                            | 92429239  | 92429414  | TC0X00000873.mm.1 | -0.1 | 0.477943 |
| TC1100002374.mm.1 | ENSMUST00000122751 | Gm22984 | predicted gene, 22984                           | 99352048  | 99352169  | TC1400002603.mm.1 | -0.2 | 0.47798  |
| TC1100002379.mm.1 | NM_008452          | Klf2    | Kruppel-like factor 2 (lung)                    | 72319033  | 72321656  | TC0800000823.mm.1 | 0.2  | 0.478003 |
| TC1100002388.mm.1 | ENSMUST00000122415 | Gm9025  | predicted gene 9025                             | 111882393 | 111884177 | TC1300002669.mm.1 | 0.2  | 0.478107 |
| TC1100002391.mm.1 | NM_181470          | Ltv1    | LTV1 homolog (S. cerevisiae)                    | 13178637  | 13193137  | TC1000001767.mm.1 | -0.1 | 0.478161 |
| TC1100002395.mm.1 | ENSMUST00000110799 | Gm6374  | predicted gene 6374                             | 83314513  | 83315300  | TC0100000721.mm.1 | 0.1  | 0.47848  |
| TC1100002400.mm.1 | ENSMUST00000180080 | Gm25942 | predicted gene, 25942                           | 22789818  | 22789927  | TC0600000192.mm.1 | -0.1 | 0.478526 |
| TC1100002404.mm.1 | ENSMUST00000104265 | Gm25915 | predicted gene, 25915                           | 142485322 | 142485447 | TC0X00003102.mm.1 | 0.1  | 0.47853  |
| TC1100002423.mm.1 | ENSMUST00000122672 | Gm25106 | predicted gene, 25106                           | 98473675  | 98473808  | TC1100003681.mm.1 | -0.2 | 0.478571 |
| TC1100002438.mm.1 | NM_001081205       | Nipal1  | NIPA-like domain containing 1                   | 72647796  | 72671078  | TC0500000675.mm.1 | 0.0  | 0.478676 |
| TC1100002439.mm.1 | NM_031178          | Tlr9    | toll-like receptor 9                            | 106222598 | 106226876 | TC0900001339.mm.1 | 0.2  | 0.478729 |
| TC1100002440.mm.1 | ENSMUST00000093668 | n-R5s71 | nuclear encoded rRNA 5S 71                      | 74319792  | 74319910  | TC1100001042.mm.1 | -0.4 | 0.479482 |
| TC1100002441.mm.1 | ENSMUST00000179169 | Gm23403 | predicted gene, 23403                           | 133191792 | 133191901 | TC0600001574.mm.1 | -0.1 | 0.479527 |
| TC1100002447.mm.1 | ENSMUST00000122206 | Gm15530 | predicted gene 15530                            | 38685315  | 38685869  | TC1600001614.mm.1 | -0.1 | 0.479609 |
| TC1100002451.mm.1 | ENSMUST00000157996 | Gm23033 | predicted gene, 23033                           | 29888341  | 29888474  | TC1500001313.mm.1 | -0.1 | 0.479942 |
| TC1100002455.mm.1 | XM_357111          | Gm5258  | predicted gene 5258                             | 86323267  | 86325433  | TC0100000785.mm.1 | 0.0  | 0.479959 |
| TC1100002461.mm.1 | NM_028761          | Parn    | poly(A)-specific ribonuclease (deadenylation nu | 13537960  | 13668170  | TC1600001231.mm.1 | 0.0  | 0.480043 |
| TC1100002471.mm.1 | ENSMUST00000181181 | Gm3272  | predicted pseudogene 3272                       | 92715747  | 92716975  | TC0800002696.mm.1 | 0.2  | 0.480064 |
| TC1100002483.mm.1 | ENSMUST00000101978 | Gm25431 | predicted gene, 25431                           | 3136984   | 3137090   | TC1900000876.mm.1 | -0.3 | 0.480203 |
| TC1100002484.mm.1 | XR_140479          | 4930527 | RIKEN cDNA 4930527J03 gene                      | 178276047 | 178278811 | TC0100003642.mm.1 | 0.0  | 0.480224 |
| TC1100002489.mm.1 | NM_021538          | Cope    | coatomer protein complex, subunit epsilon       | 70302518  | 70312993  | TC0800000744.mm.1 | -0.1 | 0.480695 |
| TC1100002491.mm.1 | NM_029623          | 3110002 | RIKEN cDNA 3110002H16 gene                      | 12168717  | 12189997  | TC1800000100.mm.1 | 0.1  | 0.480873 |
| TC1100002496.mm.1 | NM_145531          | Spg11   | spastic paraplegia 11                           | 122053520 | 122118386 | TC0200004502.mm.1 | 0.1  | 0.480877 |
| TC1100002508.mm.1 | NM_001039695       | Rhox4d  | reproductive homeobox 4D                        | 37514359  | 37519176  | TC0X00003389.mm.1 | 0.0  | 0.480897 |
| TC1100002537.mm.1 | NM_027222          | Mzb1    | marginal zone B and B1 cell-specific protein 1  | 35647265  | 35649367  | TC1800001176.mm.1 | -0.2 | 0.480967 |
| TC1100002541.mm.1 | ENSMUST00000184329 | mmu-mir | mmu-mir-6362                                    | 22605326  | 22605432  | TC1600000319.mm.1 | -0.1 | 0.48165  |
| TC1100002547.mm.1 | NM_011650          | Tsn     | translin                                        | 118298517 | 118311167 | TC0100002936.mm.1 | -0.1 | 0.481654 |
| TC1100002563.mm.1 | NM_198305          | Klhl17  | kelch-like 17                                   | 156229044 | 156234857 | TC0400004174.mm.1 | 0.0  | 0.481766 |
| TC1100002568.mm.1 | NCBI_Gene:385291.p | Igkv4-5 | immunoglobulin kappa chain variable 4-54        | 69631646  | 69632178  | TC0600003572.mm.1 | -0.6 | 0.48187  |
| TC1100002578.mm.1 | ENSMUST00000082861 | Gm22423 | predicted gene, 22423                           | 96083673  | 96083856  | TC1100003611.mm.1 | -0.2 | 0.481929 |
| TC1100002586.mm.1 | NM_019963          | Stat2   | signal transducer and activator of transcriptio | 128270576 | 128292849 | TC1000001596.mm.1 | -0.1 | 0.481981 |
| TC1100002588.mm.1 | NM_010462          | Hoxc10  | homeobox C10                                    | 102966796 | 102971898 | TC1500002339.mm.1 | -0.2 | 0.482419 |
| TC1100002593.mm.1 | NM_029562          | Cyp2d26 | cytochrome P450, family 2, subfamily d, polypep | 82790105  | 82794245  | TC1500001957.mm.1 | 0.2  | 0.482564 |
| TC1100002600.mm.1 | NM_173429          | Zfp775  | zinc finger protein 775                         | 48605536  | 48623227  | TC0600000562.mm.1 | 0.0  | 0.482669 |
| TC1100002630.mm.1 | ENSMUST00000182882 | Gm9211  | predicted gene 9211                             | 36234292  | 36235266  | TC0700000674.mm.1 | -0.1 | 0.482681 |
| TC1100002631.mm.1 | ENSMUST00000118624 | Gm13700 | predicted gene 13700                            | 80861155  | 80862282  | TC0200003844.mm.1 | 0.0  | 0.482751 |

|                   |                    |         |                                                  |           |           |                   |      |          |
|-------------------|--------------------|---------|--------------------------------------------------|-----------|-----------|-------------------|------|----------|
| TC1100002637.mm.1 | NM_001103168       | Zglp1   | zinc finger, GATA-like protein 1                 | 21062393  | 21092008  | TC0900001857.mm.1 | -0.1 | 0.482751 |
| TC1100002638.mm.1 | ENSMUST00000164512 | Gm2974  | predicted gene 2974                              | 4182576   | 4204895   | TC1400002789.mm.1 | 0.1  | 0.483033 |
| TC1100002642.mm.1 | ENSMUST00000184264 | SNORA62 | Small nucleolar RNA SNORA62/SNORA6 family        | 85168849  | 85169001  | TC1600000943.mm.1 | 0.0  | 0.483083 |
| TC1100002646.mm.1 | NM_027419          | 2810408 | RIKEN cDNA 2810408A11 gene                       | 69897352  | 69900987  | TC1100003075.mm.1 | 0.0  | 0.483085 |
| TC1100002648.mm.1 | ENSMUST00000157117 | Gm25152 | predicted gene, 25152                            | 27108982  | 27109095  | TC0300000157.mm.1 | 0.1  | 0.483371 |
| TC1100002660.mm.1 | NM_008272          | Hoxc9   | homeobox C9                                      | 102976439 | 102985099 | TC1500001119.mm.1 | 0.0  | 0.483511 |
| TC1100002666.mm.1 | NR_004432          | Rnu12   | RNA U12, small nuclear                           | 83149644  | 83149794  | TC1500000767.mm.1 | -0.3 | 0.484284 |
| TC1100002667.mm.1 | NM_001037762       | Zdhc12  | zinc finger, DHC domain containing 12            | 30090944  | 30093648  | TC0200003262.mm.1 | 0.0  | 0.484577 |
| TC1100002694.mm.1 | NM_011427          | Snai1   | snail homolog 1 (Drosophila)                     | 167538195 | 167542814 | TC0200002589.mm.1 | 0.1  | 0.48458  |
| TC1100002698.mm.1 | ENSMUST00000050108 | Gm5479  | predicted gene 5479                              | 3056687   | 3057121   | TC1700000002.mm.1 | -0.1 | 0.484601 |
| TC1100002700.mm.1 | ENSMUST00000173416 | Gm20526 | predicted gene 20526                             | 36723948  | 36724275  | TC1700000741.mm.1 | -0.1 | 0.484842 |
| TC1100002710.mm.1 | ENSMUST00000183485 | RP24-67 | N/A                                              | 69348897  | 69352259  | TC1400002313.mm.1 | 0.0  | 0.484883 |
| TC1100002712.mm.1 | ENSMUST00000175470 | Gm25250 | predicted gene, 25250                            | 77577714  | 77577789  | TC0900001036.mm.1 | -0.1 | 0.484888 |
| TC1100002713.mm.1 | ENSMUST00000181779 | Gm10410 | predicted gene 10410                             | 3884172   | 3921640   | TC1400000015.mm.1 | 0.0  | 0.484926 |
| TC1100002714.mm.1 | ENSMUST00000158708 | Gm24343 | predicted gene, 24343                            | 14233513  | 14233623  | TC1000000107.mm.1 | 0.0  | 0.485087 |
| TC1100002715.mm.1 | NM_011715          | Wdr1    | WD repeat domain 1                               | 38526813  | 38561666  | TC0500002286.mm.1 | -0.1 | 0.485199 |
| TC1100002736.mm.1 | NM_025655          | Tmigd1  | transmembrane and immunoglobulin domain co       | 76902159  | 76916587  | TC1100001108.mm.1 | 0.1  | 0.48545  |
| TC1100002748.mm.1 | ENSMUST00000179402 | Gm15260 | predicted gene 15260                             | 4366897   | 4367779   | TC0X00000020.mm.1 | -0.1 | 0.485647 |
| TC1100002750.mm.1 | ENSMUST00000170706 | Gm5456  | predicted gene 5456                              | 7241442   | 7242290   | TC1400000064.mm.1 | 0.2  | 0.48569  |
| TC1100002754.mm.1 | ENSMUST00000157207 | Gm23958 | predicted gene, 23958                            | 138422715 | 138422819 | TC0X00003054.mm.1 | -0.1 | 0.486146 |
| TC1100002765.mm.1 | XM_982314          | Gm7980  | predicted gene 7980                              | 41901813  | 41907290  | TC1400001810.mm.1 | 0.0  | 0.486382 |
| TC1100002772.mm.1 | NM_144546          | Zfp119a | zinc finger protein 119a                         | 55864927  | 55944906  | TC1700002303.mm.1 | 0.1  | 0.486451 |
| TC1100002773.mm.1 | NM_021431          | Nudt11  | nudix (nucleoside diphosphate linked moiety X)-  | 6047453   | 6055110   | TC0X00000044.mm.1 | 0.0  | 0.486524 |
| TC1100002775.mm.1 | NM_007836          | Gadd45a | growth arrest and DNA-damage-inducible 45 alp    | 67035096  | 67037457  | TC0600002422.mm.1 | 0.0  | 0.486633 |
| TC1100002786.mm.1 | NM_001024919       | Bod1    | bioorientation of chromosomes in cell division 1 | 31665150  | 31671919  | TC1100002461.mm.1 | 0.0  | 0.48672  |
| TC1100002793.mm.1 | NM_001190444       | Aamp    | angio-associated migratory protein               | 74279840  | 74284738  | TC0100002582.mm.1 | 0.1  | 0.486751 |
| TC1100002815.mm.1 | NM_009942          | Cox5b   | cytochrome c oxidase subunit Vb                  | 36691487  | 36693388  | TC0100000253.mm.1 | 0.1  | 0.486836 |
| TC1100002818.mm.1 | ENSMUST00000080835 | Olfr979 | olfactory receptor 979                           | 40000206  | 40001250  | TC0900002089.mm.1 | 0.1  | 0.487014 |
| TC1100002822.mm.1 | ENSMUST00000104513 | Gm24068 | predicted gene, 24068                            | 14079809  | 14079940  | TC0400002229.mm.1 | 0.1  | 0.487167 |
| TC1100002826.mm.1 | ENSMUST00000139711 | Defa-ps | defensin, alpha, pseudogene 1                    | 21695012  | 21695853  | TC0800000254.mm.1 | 0.0  | 0.488127 |
| TC1100002833.mm.1 | ENSMUST00000177720 | Gm16368 | predicted pseudogene 16368                       | 88083697  | 88084131  | TC1200000891.mm.1 | 0.1  | 0.488202 |
| TC1100002834.mm.1 | ENSMUST00000175120 | Gm25707 | predicted gene, 25707                            | 132408309 | 132408404 | TC0400001586.mm.1 | -0.2 | 0.488203 |
| TC1100002835.mm.1 | NM_145476          | Tbc1d22 | TBC1 domain family, member 22a                   | 86214459  | 86498503  | TC1500000835.mm.1 | -0.1 | 0.488222 |
| TC1100002836.mm.1 | NM_001005358       | Zfp960  | zinc finger protein 960                          | 17064103  | 17089631  | TC1700000194.mm.1 | -0.2 | 0.488262 |
| TC1100002837.mm.1 | NM_001100181       | Cyp4a32 | cytochrome P450, family 4, subfamily a, polypep  | 115600938 | 115622366 | TC0400004188.mm.1 | 0.2  | 0.48828  |
| TC1100002849.mm.1 | ENSMUST00000116469 | Gm13768 | predicted gene 13768                             | 90174097  | 90195152  | TC0100001345.mm.1 | 0.1  | 0.488286 |
| TC1100002852.mm.1 | NM_023645          | Kdelc1  | KDEL (Lys-Asp-Glu-Leu) containing 1              | 44106546  | 44118808  | TC0100003877.mm.1 | 0.0  | 0.488342 |
| TC1100002853.mm.1 | NM_010639          | Klk1    | kallikrein 1                                     | 44225437  | 44229618  | TC0700000796.mm.1 | 0.5  | 0.48862  |
| TC1100002855.mm.1 | NM_029293          | Phpt1   | phosphohistidine phosphatase 1                   | 25573430  | 25575224  | TC0200005494.mm.1 | 0.0  | 0.48865  |
| TC1100002856.mm.1 | NM_172378          | Slc22a2 | solute carrier family 22 (organic cation transp  | 57243767  | 57477625  | TC1500001552.mm.1 | 0.2  | 0.488703 |
| TC1100002860.mm.1 | XM_003084912       | Gm10465 | predicted gene 10465                             | 54512133  | 54517079  | TC1200001745.mm.1 | 0.0  | 0.488845 |
| TC1100002861.mm.1 | NM_001033202       | Usp30   | ubiquitin specific peptidase 30                  | 114100333 | 114123506 | TC0500001219.mm.1 | 0.1  | 0.48949  |
| TC1100002865.mm.1 | NM_026173          | Poc5    | POC5 centriolar protein homolog (Chlamydomor     | 96388294  | 96415587  | TC1300001087.mm.1 | -0.1 | 0.489626 |
| TC1100002875.mm.1 | ENSMUST00000175499 | Gm24573 | predicted gene, 24573                            | 48762851  | 48762962  | TC0400002631.mm.1 | -0.3 | 0.489792 |
| TC1100002880.mm.1 | ENSMUST00000083177 | Gm25141 | predicted gene, 25141                            | 102627779 | 102627885 | TC1500002298.mm.1 | -0.1 | 0.490046 |
| TC1100002886.mm.1 | ENSMUST00000158638 | Gm22892 | predicted gene, 22892                            | 135740997 | 135741101 | TC0600001611.mm.1 | 0.0  | 0.490055 |
| TC1100002890.mm.1 | XM_003689029       | Gm21412 | predicted gene, 21412                            | 24969429  | 24970420  | TC0Y00000072.mm.1 | 0.1  | 0.490303 |
| TC1100002892.mm.1 | ENSMUST00000178701 | Gm23269 | predicted gene, 23269                            | 89201167  | 89201273  | TC0300002339.mm.1 | -0.4 | 0.490361 |
| TC1100002898.mm.1 | ENSMUST00000169373 | Olfr100 | olfactory receptor 100 // olfactory receptor 1   | 37313411  | 37314437  | TC1700002066.mm.1 | 0.0  | 0.490411 |
| TC1100002899.mm.1 | NR_030499          | Mir505  | microRNA 505                                     | 60394403  | 60394492  | TC0X00002311.mm.1 | -0.1 | 0.490435 |
| TC1100002903.mm.1 | NCBI_Gene:632654:p | Ighv7-4 | immunoglobulin heavy variable 7-4                | 114222788 | 114223254 | TC1200002587.mm.1 | -0.1 | 0.490501 |
| TC1100002904.mm.1 | NM_023422          | Hist1h2 | histone cluster 1, H2bc                          | 23684199  | 23692488  | TC1300000255.mm.1 | -0.1 | 0.490563 |
| TC1100002906.mm.1 | ENSMUST00000178592 | Gm24100 | predicted gene, 24100                            | 59598904  | 59598982  | TC0700003259.mm.1 | -0.1 | 0.490861 |
| TC1100002909.mm.1 | ENSMUST00000120148 | Gm15019 | predicted gene 15019                             | 135726998 | 135729474 | TC0X00001305.mm.1 | 0.1  | 0.490943 |
| TC1100002911.mm.1 | NR_033629          | BC02176 | cingulin pseudogene                              | 94660589  | 94670696  | TC0300002451.mm.1 | 0.0  | 0.491046 |
| TC1100002914.mm.1 | ENSMUST00000082460 | Gm23622 | predicted gene, 23622                            | 75651423  | 75651529  | TC1400002425.mm.1 | -0.2 | 0.491257 |
| TC1100002919.mm.1 | ENSMUST00000102377 | Gm24715 | predicted gene, 24715                            | 18417839  | 18417933  | TC0700002451.mm.1 | 0.2  | 0.491393 |
| TC1100002928.mm.1 | NM_001039392       | Tmsb10  | thymosin, beta 10                                | 72957347  | 72958748  | TC0600002504.mm.1 | 0.0  | 0.491532 |
| TC1100002932.mm.1 | NCBI_Gene:630486:p | Ighv2-6 | immunoglobulin heavy variable 2-6                | 113716670 | 113717103 | TC1200002563.mm.1 | -0.2 | 0.49163  |
| TC1100002947.mm.1 | ENSMUST00000120685 | Gm16179 | predicted gene 16179                             | 61112130  | 61112502  | TC0800002292.mm.1 | -0.1 | 0.491774 |
| TC1100002957.mm.1 | ENSMUST00000122283 | Gm15599 | predicted gene 15599                             | 5110781   | 5112119   | TC1700001365.mm.1 | -0.2 | 0.491834 |
| TC1100002965.mm.1 | NM_199017          | 9230110 | RIKEN cDNA 9230110C19 gene                       | 8021672   | 8042823   | TC0900001725.mm.1 | 0.1  | 0.49185  |
| TC1100002967.mm.1 | ENSMUST00000083844 | Gm22154 | predicted gene, 22154                            | 123293152 | 123293282 | TC0400001397.mm.1 | 0.3  | 0.491895 |
| TC1100002990.mm.1 | NR_033504          | Gm9962  | predicted gene 9962                              | 57387272  | 57409941  | TC0700000939.mm.1 | 0.0  | 0.49193  |
| TC1100003013.mm.1 | NM_027394          | Ube2cbp | ubiquitin-conjugating enzyme E2C binding protei  | 86307234  | 86464950  | TC0900002776.mm.1 | 0.0  | 0.492205 |
| TC1100003038.mm.1 | NM_008389          | Ipp     | IAP promoted placental gene                      | 116507549 | 116538243 | TC0400001253.mm.1 | 0.0  | 0.492332 |
| TC1100003041.mm.1 | ENSMUST00000175217 | Mir5128 | microRNA 5128                                    | 37688201  | 37688284  | TC0200003405.mm.1 | -0.1 | 0.492526 |
| TC1100003042.mm.1 | uc029vhq.1         | LOC4328 | non-coding RNA, oocyte_clustered_small_RNA4.     | 54553179  | 55011991  | TC0500002432.mm.1 | 0.2  | 0.49261  |
| TC1100003043.mm.1 | NCBI_Gene:628541:p | Igkv4-6 | immunoglobulin kappa variable 4-69               | 69283794  | 69284319  | TC0600003561.mm.1 | -0.4 | 0.492704 |
| TC1100003045.mm.1 | NM_174877          | Zar1    | zygote arrest 1                                  | 72577114  | 72581084  | TC0500002576.mm.1 | 0.0  | 0.492705 |
| TC1100003046.mm.1 | NM_001080817       | Prdm10  | PR domain containing 10                          | 31280538  | 31378543  | TC0900000279.mm.1 | -0.1 | 0.492796 |
| TC1100003047.mm.1 | NM_175308          | Mob3c   | MOB kinase activator 3C                          | 115828092 | 115836185 | TC0400001238.mm.1 | 0.0  | 0.493108 |
| TC1100003049.mm.1 | ENSMUST00000179124 | AC13310 | N/A                                              | 54469     | 54840     | TC1_GL456221_rand | -0.2 | 0.493234 |
| TC1100003053.mm.1 | ENSMUST00000180119 | AC13244 | N/A                                              | 58743     | 59114     | TC1_GL456221_rand | -0.2 | 0.493234 |
| TC1100003055.mm.1 | ENSMUST00000179292 | AC13244 | N/A                                              | 46295     | 46666     | TC1_GL456221_rand | -0.2 | 0.493234 |
| TC1100003057.mm.1 | ENSMUST00000158082 | Gm25551 | predicted gene, 25551                            | 37092258  | 37092360  | TC0500002270.mm.1 | 0.0  | 0.49325  |
| TC1100003059.mm.1 | ENSMUST00000116000 | Gm10698 | predicted gene 10698                             | 33728213  | 33728889  | TC0900000307.mm.1 | 0.1  | 0.493335 |
| TC1100003062.mm.1 | NM_001190474       | Dapk3   | death-associated protein kinase 3                | 81183007  | 81193197  | TC1000000886.mm.1 | 0.0  | 0.493418 |

|                   |                    |         |                                                 |           |           |                    |      |          |
|-------------------|--------------------|---------|-------------------------------------------------|-----------|-----------|--------------------|------|----------|
| TC1100003063.mm.1 | NM_130873          | Krtap19 | keratin associated protein 19-4                 | 88884786  | 88885089  | TC1600002019.mm.1  | -0.1 | 0.493535 |
| TC1100003069.mm.1 | NM_172277          | Snx8    | sorting nexin 8                                 | 140340303 | 140389251 | TC0500003507.mm.1  | 0.1  | 0.493573 |
| TC1100003072.mm.1 | NM_028810          | Rnd3    | Rho family GTPase 3                             | 51130438  | 51149111  | TC0200003512.mm.1  | 0.1  | 0.493758 |
| TC1100003075.mm.1 | ENSMUST00000087348 | Gm10203 | predicted gene 10203                            | 149130170 | 149130710 | TC0600001767.mm.1  | -0.1 | 0.493807 |
| TC1100003076.mm.1 | ENSMUST00000123422 | Gm12162 | predicted gene 12162                            | 45452399  | 45468504  | TC1100002588.mm.1  | -0.1 | 0.494016 |
| TC1100003078.mm.1 | NM_008959          | Ptdss1  | phosphatidylserine synthase 1                   | 66932830  | 66998401  | TC1300000815.mm.1  | 0.1  | 0.494216 |
| TC1100003083.mm.1 | ENSMUST00000185055 | AC15441 | N/A                                             | 91752106  | 91752185  | TC1300001029.mm.1  | -0.1 | 0.494416 |
| TC1100003086.mm.1 | ENSMUST00000095646 | Gm10322 | predicted gene 10322                            | 59616063  | 59616398  | TC100000536.mm.1   | 0.1  | 0.49469  |
| TC1100003089.mm.1 | NM_013614          | Odc1    | ornithine decarboxylase, structural 1           | 17544873  | 17551502  | TC120000142.mm.1   | -0.1 | 0.495026 |
| TC1100003093.mm.1 | NM_001166658       | Cdr1    | cerebellar degeneration related antigen 1       | 61183246  | 61185558  | TC0X00002320.mm.1  | -0.1 | 0.495068 |
| TC1100003095.mm.1 | ENSMUST00000122488 | Gm23428 | predicted gene, 23428                           | 66360641  | 66360742  | TC0900002524.mm.1  | -0.2 | 0.495087 |
| TC1100003106.mm.1 | NM_130858          | Nxph3   | neurexophilin 3                                 | 95509845  | 95514570  | TC1100003592.mm.1  | 0.0  | 0.495106 |
| TC1100003115.mm.1 | ENSMUST00000178603 | AC13310 | N/A                                             | 160447    | 165925    | TC1_GL456211_rand  | -0.3 | 0.49522  |
| TC1100003120.mm.1 | NR_028535          | Snord90 | small nucleolar RNA, C/D box 90                 | 37400047  | 37400157  | TC0200003399.mm.1  | -0.3 | 0.495428 |
| TC1100003127.mm.1 | NM_001164634       | Slc22a8 | solute carrier family 22 (organic anion transpo | 8591254   | 8611835   | TC1900000148.mm.1  | 0.2  | 0.495499 |
| TC1100003134.mm.1 | ENSMUST00000055593 | Gm8258  | predicted gene 8258                             | 104775911 | 104776824 | TC0500001034.mm.1  | -0.1 | 0.496202 |
| TC1100003148.mm.1 | ENSMUST00000082751 | Gm25812 | predicted gene, 25812                           | 22434414  | 22434516  | TC0X00002322.mm.1  | -0.2 | 0.496331 |
| TC1100003150.mm.1 | ENSMUST00000082641 | Gm25798 | predicted gene, 25798                           | 138101433 | 138101539 | TC0700004469.mm.1  | -0.2 | 0.496339 |
| TC1100003156.mm.1 | NM_177721          | Ranbp6  | RAN binding protein 6                           | 29808108  | 29812974  | TC1900001353.mm.1  | 0.0  | 0.496639 |
| TC1100003161.mm.1 | NM_011823          | Gpr34   | G protein-coupled receptor 34                   | 13632089  | 13640858  | TC0X00000169.mm.1  | 0.1  | 0.49679  |
| TC1100003175.mm.1 | ENSMUST00000175553 | Gm25399 | predicted gene, 25399                           | 137183987 | 137184062 | TC0400001699.mm.1  | -0.1 | 0.497022 |
| TC1100003181.mm.1 | ENSMUST00000082721 | Gm25788 | predicted gene, 25788                           | 123291344 | 123291474 | TC0400001396.mm.1  | 0.4  | 0.497277 |
| TC1100003186.mm.1 | ENSMUST00000082714 | Gm23303 | predicted gene, 23303                           | 148443334 | 148443485 | TC0400004022.mm.1  | 0.1  | 0.497289 |
| TC1100003193.mm.1 | NM_001024142       | Fbxo10  | F-box protein 10                                | 45034247  | 45084604  | TC0400002570.mm.1  | 0.0  | 0.49739  |
| TC1100003198.mm.1 | ENSMUST00000082739 | Gm22805 | predicted gene, 22805                           | 46630113  | 46630219  | TC0900002223.mm.1  | -0.2 | 0.497395 |
| TC1100003204.mm.1 | NM_001037917       | Gm6377  | predicted gene 6377                             | 109196756 | 109200445 | TC0X00003400.mm.1  | -0.1 | 0.497461 |
| TC1100003211.mm.1 | ENSMUST00000082588 | Gm26442 | predicted gene, 26442                           | 66088109  | 66088261  | TC0300002105.mm.1  | 0.2  | 0.497479 |
| TC1100003212.mm.1 | NM_146008          | Tcp11l2 | t-complex 11 (mouse) like 2                     | 84576626  | 84614359  | TC1000001020.mm.1  | -0.1 | 0.497533 |
| TC1100003213.mm.1 | XM_001475976       | Gm3115  | predicted gene 3115                             | 4084120   | 4099306   | TC1400000018.mm.1  | 0.0  | 0.497945 |
| TC1100003217.mm.1 | ENSMUST00000184860 | AC11459 | N/A                                             | 74235558  | 74235664  | TC0700001075.mm.1  | 0.3  | 0.498114 |
| TC1100003224.mm.1 | ENSMUST00000104092 | Gm25764 | predicted gene, 25764                           | 129302091 | 129302224 | TC1000001635.mm.1  | 0.1  | 0.498183 |
| TC1100003225.mm.1 | NCBI_Gene:385109:p | Igkv4-7 | immunoglobulin kappa chain variable 4-72        | 69226853  | 69227423  | TC0600003558.mm.1  | -0.5 | 0.49822  |
| TC1100003229.mm.1 | NR_028566          | Snord11 | small nucleolar RNA, C/D box 118                | 69073426  | 69073562  | TC1100000895.mm.1  | -0.3 | 0.498247 |
| TC1100003240.mm.1 | NM_177777          | D11Wsu4 | DNA segment, Chr 11, Wayne State University 4:  | 113684406 | 113726467 | TC1100001863.mm.1  | 0.0  | 0.498308 |
| TC1100003264.mm.1 | ENSMUST00000116869 | Gm22194 | predicted gene, 22194                           | 11940973  | 11941067  | TC1000000087.mm.1  | 0.1  | 0.498325 |
| TC1100003265.mm.1 | BC059222           | Dpp8    | dipeptidylpeptidase 8                           | 65032458  | 65082651  | TC0900000826.mm.1  | 0.1  | 0.498403 |
| TC1100003271.mm.1 | XM_003689015       | Gm21117 | predicted gene, 21117                           | 51126646  | 51151286  | TC0Y00000148.mm.1  | -0.1 | 0.498621 |
| TC1100003272.mm.1 | NM_001033364       | Cdhr2   | cadherin-related family member 2                | 54701461  | 54736662  | TC1300000635.mm.1  | 0.0  | 0.498667 |
| TC1100003276.mm.1 | XM_003689107       | Gm21477 | predicted gene, 21477                           | 87116821  | 87142912  | TC0Y00000212.mm.1  | -0.1 | 0.498797 |
| TC1100003281.mm.1 | NM_175329          | Chchd10 | coiled-coil-helix-coiled-coil-helix domain cont | 75933467  | 75937744  | TC1000000729.mm.1  | 0.1  | 0.499009 |
| TC1100003283.mm.1 | ENSMUST00000158353 | Gm23757 | predicted gene, 23757                           | 26358046  | 26358046  | TC1000000232.mm.1  | 0.1  | 0.499542 |
| TC1100003285.mm.1 | ENSMUST00000121413 | Mrpl48- | mitochondrial ribosomal protein L48 pseudogen   | 88599175  | 88599810  | TC0400003005.mm.1  | -0.1 | 0.499594 |
| TC1100003288.mm.1 | NM_001039078       | Prosc   | proline synthetase co-transcribed               | 27042555  | 27056132  | TC0800000346.mm.1  | 0.1  | 0.499829 |
| TC1100003289.mm.1 | NM_026510          | Ftsj2   | FtsJ homolog 2 (E. coli)                        | 140327674 | 140331898 | TC0500003506.mm.1  | 0.0  | 0.499866 |
| TC1100003290.mm.1 | ENSMUST00000073636 | Olfr117 | olfactory receptor 117                          | 37659378  | 37660331  | TC1700002078.mm.1  | 0.0  | 0.499972 |
| TC1100003293.mm.1 | ENSMUST00000061226 | Gm8508  | predicted gene 8508                             | 109757522 | 109757931 | TC0500002974.mm.1  | -0.1 | 0.500085 |
| TC1100003295.mm.1 | NM_028730          | Pex26   | peroxisomal biogenesis factor 26                | 121183667 | 121198837 | TC0600001366.mm.1  | 0.0  | 0.500146 |
| TC1100003298.mm.1 | ENSMUST00000175316 | Gm22132 | predicted gene, 22132                           | 136757510 | 136757609 | TC0100003154.mm.1  | 0.2  | 0.50039  |
| TC1100003299.mm.1 | NCBI_Gene:780794:p | Ighv5-1 | immunoglobulin heavy variable 5-17              | 113859149 | 113859616 | TC1200002572.mm.1  | -0.4 | 0.500651 |
| TC1100003300.mm.1 | NM_133660          | Ces1e   | carboxylesterase 1E                             | 93201218  | 93229619  | TC0800002704.mm.1  | 0.1  | 0.500718 |
| TC1100003310.mm.1 | ENSMUST00000178379 | LOC1010 | centrin-1-like                                  | 21272338  | 21273082  | TC0100000136.mm.1  | 0.1  | 0.500768 |
| TC1100003311.mm.1 | ENSMUST00000157608 | Gm25428 | predicted gene, 25428                           | 123471384 | 123471497 | TC0800001525.mm.1  | 0.1  | 0.500958 |
| TC1100003315.mm.1 | NM_025716          | Spryd4  | SPRY domain containing 4                        | 128209908 | 128211794 | TC1000003132.mm.1  | 0.0  | 0.500982 |
| TC1100003321.mm.1 | ENSMUST00000178200 | Gm22264 | predicted gene, 22264                           | 43070300  | 43070406  | TC1800001266.mm.1  | 0.0  | 0.501006 |
| TC1100003326.mm.1 | NM_029025          | Tmem81  | transmembrane protein 81                        | 132506230 | 132508639 | TC0100001196.mm.1  | 0.0  | 0.501185 |
| TC1100003328.mm.1 | NM_011765          | Zfp97   | zinc finger protein 97                          | 17121383  | 17146878  | TC1700000198.mm.1  | -0.1 | 0.501303 |
| TC1100003333.mm.1 | NCBI_Gene:235952:p | Igkv4-5 | immunoglobulin kappa variable 4-57              | 69575975  | 69576500  | TC0600003570.mm.1  | -0.5 | 0.501376 |
| TC1100003334.mm.1 | NM_180678          | Gars    | glycyl-tRNA synthetase                          | 55038001  | 55079504  | TC0600000661.mm.1  | -0.1 | 0.501457 |
| TC1100003340.mm.1 | ENSMUST00000181879 | Gm7678  | predicted gene 7678                             | 22124496  | 22125438  | TC1000000174.mm.1  | 0.0  | 0.501584 |
| TC1100003342.mm.1 | NM_172734          | Stk38l  | serine/threonine kinase 38 like                 | 146724930 | 146778814 | TC0600001736.mm.1  | 0.0  | 0.501662 |
| TC1100003345.mm.1 | ENSMUST00000114214 | Igkv13- | immunoglobulin kappa variable 13-87             | 68895624  | 68903249  | TC0600000802.mm.1  | -0.1 | 0.50172  |
| TC1100003356.mm.1 | NM_011663          | Zrsr1   | zinc finger (CCCH type), RNA binding motif and  | 22972005  | 22976496  | TC110000231.mm.1   | 0.1  | 0.501984 |
| TC1100003361.mm.1 | ENSMUST00000182170 | Gm4819  | predicted gene 4819                             | 56250069  | 56251077  | TC1400000803.mm.1  | 0.0  | 0.502012 |
| TC1100003365.mm.1 | NM_021517          | Pdzk1   | PDZ domain containing 1                         | 96829284  | 96870926  | TC0300000958.mm.1  | 0.2  | 0.502263 |
| TC1100003369.mm.1 | NM_027782          | Kctd6   | potassium channel tetramerisation domain cont   | 8214148   | 8223570   | TC1400000078.mm.1  | 0.0  | 0.502437 |
| TC1100003379.mm.1 | NM_023290          | Mkrn2   | makorin, ring finger protein, 2                 | 115601928 | 115618670 | TC0600001283.mm.1  | -0.1 | 0.502567 |
| TC1100003382.mm.1 | XM_001475120       | Gm20855 | predicted gene, 20855                           | 35105689  | 35131848  | TC0Y00000563.mm.1  | -0.1 | 0.50269  |
| TC1100003384.mm.1 | NM_021435          | Slc35b4 | solute carrier family 35, member B4             | 34153380  | 34177111  | TC0600002044.mm.1  | 0.1  | 0.503029 |
| TC1100003392.mm.1 | ENSMUST00000082387 | mt-Tf   | mitochondrially encoded tRNA phenylalanine      | 1         | 68        | TC0M000000001.mm.1 | 0.3  | 0.503169 |
| TC1100003400.mm.1 | ENSMUST00000083723 | Gm25337 | predicted gene, 25337                           | 102549196 | 102549299 | TC1100003846.mm.1  | -0.3 | 0.503239 |
| TC1100003401.mm.1 | NM_026937          | Ascc1   | activating signal cointegrator 1 complex subuni | 60002805  | 60099990  | TC1000000541.mm.1  | 0.0  | 0.503254 |
| TC1100003402.mm.1 | NM_133998          | Fam207a | family with sequence similarity 207, member A   | 77486655  | 77515813  | TC1000002422.mm.1  | 0.0  | 0.50339  |
| TC1100003403.mm.1 | ENSMUST00000082685 | Gm23975 | predicted gene, 23975                           | 16861689  | 16861794  | TC0400002254.mm.1  | 0.1  | 0.503404 |
| TC1100003406.mm.1 | NM_007952          | Pdia3   | protein disulfide isomerase associated 3        | 121413775 | 121438687 | TC0200001812.mm.1  | -0.1 | 0.50382  |
| TC1100003418.mm.1 | ENSMUST00000180439 | Gm14332 | predicted gene 14332                            | 3276856   | 3278543   | TC0X00001719.mm.1  | 0.0  | 0.503874 |
| TC1100003420.mm.1 | NCBI_Gene:110761:p | Igkj3   | immunoglobulin kappa joining 3                  | 70723223  | 70723260  | TC0600000811.mm.1  | -0.4 | 0.503878 |
| TC1100003425.mm.1 | NM_001177481       | Gm10104 | predicted gene 10104                            | 21065038  | 21089644  | TC0800000213.mm.1  | 0.1  | 0.504013 |
| TC1100003452.mm.1 | NR_030477          | Mir455  | microRNA 455                                    | 63256851  | 63256932  | TC0400000717.mm.1  | -0.1 | 0.504291 |

|                   |                    |         |                                                 |           |           |                   |      |          |
|-------------------|--------------------|---------|-------------------------------------------------|-----------|-----------|-------------------|------|----------|
| TC1100003462.mm.1 | NM_177067          | Fam118a | family with sequence similarity 118, member A   | 85037062  | 85062830  | TC1500000801.mm.1 | 0.0  | 0.504305 |
| TC1100003469.mm.1 | ENSMUST00000083768 | Gm22828 | predicted gene, 22828                           | 19624609  | 19624715  | TC0600000155.mm.1 | 0.1  | 0.5046   |
| TC1100003470.mm.1 | NR_035483          | Mir1957 | microRNA 1957                                   | 119129779 | 119129844 | TC0400001326.mm.1 | 0.1  | 0.504932 |
| TC1100003474.mm.1 | ENSMUST00000120701 | Gm1866  | predicted gene 1866                             | 114592048 | 114592524 | TC0X00002886.mm.1 | -0.1 | 0.504965 |
| TC1100003478.mm.1 | NM_001163700       | Nr1h4   | nuclear receptor subfamily 1, group H, member . | 89454234  | 89533622  | TC1000002657.mm.1 | 0.1  | 0.505159 |
| TC1100003479.mm.1 | XR_106408          | Gm11555 | predicted gene 11555                            | 99649599  | 99650236  | TC1100003726.mm.1 | -0.1 | 0.505223 |
| TC1100003491.mm.1 | NM_026399          | Wdr83   | WD repeat domain containing 83                  | 85075035  | 85081306  | TC0800002603.mm.1 | 0.0  | 0.505303 |
| TC1100003505.mm.1 | ENSMUST00000116792 | Gm25753 | predicted gene, 25753                           | 10502391  | 10502511  | TC0200000172.mm.1 | -0.1 | 0.505357 |
| TC1100003523.mm.1 | ENSMUST00000118182 | Gm5944  | predicted gene 5944                             | 115458894 | 115459894 | TC0X00002892.mm.1 | -0.1 | 0.505562 |
| TC1100003527.mm.1 | ENSMUST00000182565 | Gm8825  | predicted gene 8825                             | 25795810  | 25796807  | TC1900001298.mm.1 | -0.1 | 0.506018 |
| TC1100003534.mm.1 | NM_001037915       | Ripply1 | rippy1 homolog (zebrafish)                      | 139779549 | 139782353 | TC0X00003064.mm.1 | 0.0  | 0.506104 |
| TC1100003541.mm.1 | ENSMUST00000157962 | Gm22962 | predicted gene, 22962                           | 68510163  | 68510235  | TC0900000890.mm.1 | 0.1  | 0.506182 |
| TC1100003544.mm.1 | ENSMUST00000185097 | RP23-16 | N/A                                             | 15566485  | 15566869  | TC0700002410.mm.1 | -0.1 | 0.50645  |
| TC1100003550.mm.1 | ENSMUST00000177817 | Gm21738 | predicted gene, 21738                           | 19415857  | 19418930  | TC1400001514.mm.1 | 0.1  | 0.506461 |
| TC1100003561.mm.1 | NM_001162932       | Rmi2    | RMI2, RecQ mediated genome instability 2, hom   | 10835059  | 10892966  | TC1600000124.mm.1 | 0.0  | 0.506605 |
| TC1100003584.mm.1 | NM_025556          | Coprs   | coordinator of PRMT5, differentiation stimulat  | 13884788  | 13890271  | TC0800001745.mm.1 | 0.0  | 0.506794 |
| TC1100003592.mm.1 | ENSMUST00000104189 | Gm25168 | predicted gene, 25168                           | 15757832  | 15757963  | TC0100000090.mm.1 | 0.1  | 0.506872 |
| TC1100003593.mm.1 | NM_001270685       | Gm21637 | predicted gene, 21637                           | 3835879   | 3837534   | TC0X00001728.mm.1 | -0.1 | 0.506879 |
| TC1100003596.mm.1 | ENSMUST00000104542 | Gm23609 | predicted gene, 23609                           | 78013972  | 78014098  | TC0900002711.mm.1 | 0.1  | 0.506965 |
| TC1100003609.mm.1 | NM_028410          | Prkir   | protein-kinase, interferon-inducible double str | 98703103  | 98718062  | TC0700001372.mm.1 | 0.0  | 0.507016 |
| TC1100003610.mm.1 | NM_013819          | H2-M3   | histocompatibility 2, M region locus 3          | 37270220  | 37274488  | TC1700000765.mm.1 | -0.1 | 0.507157 |
| TC1100003611.mm.1 | NM_146982          | Olfr125 | olfactory receptor 1257                         | 89878444  | 89881809  | TC0200001337.mm.1 | -0.1 | 0.507429 |
| TC1100003627.mm.1 | ENSMUST00000163003 | Gm16103 | predicted gene 16103                            | 43785910  | 43787188  | TC0100000330.mm.1 | 0.1  | 0.507454 |
| TC1100003629.mm.1 | XR_140613          | Gm12526 | predicted gene 12526                            | 57756340  | 57763901  | TC0400002727.mm.1 | -0.1 | 0.507659 |
| TC1100003630.mm.1 | ENSMUST00000121611 | Mup-ps2 | major urinary protein, pseudogene 22            | 55123695  | 55123937  | TC1100000642.mm.1 | -0.2 | 0.507789 |
| TC1100003636.mm.1 | ENSMUST00000178527 | Gm25646 | predicted gene, 25646                           | 59379451  | 59379529  | TC0700003151.mm.1 | -0.1 | 0.507832 |
| TC1100003637.mm.1 | NM_028491          | 1700040 | RIKEN cDNA 1700040L02 gene                      | 68430953  | 68541896  | TC1000002330.mm.1 | 0.1  | 0.507968 |
| TC1100003643.mm.1 | ENSMUST00000082780 | n-R5s62 | nuclear encoded rRNA 5S 62                      | 82150468  | 82150563  | TC1200000768.mm.1 | 0.2  | 0.508034 |
| TC1100003657.mm.1 | XM_001472358       | Gm2036  | predicted gene 2036                             | 26415053  | 26415711  | TC0X00001981.mm.1 | 0.0  | 0.508079 |
| TC1100003659.mm.1 | NM_026145          | Kctd10  | potassium channel tetramerisation domain cont   | 114363567 | 114380515 | TC0500003060.mm.1 | 0.0  | 0.508417 |
| TC1100003660.mm.1 | NM_146499          | Olfr484 | olfactory receptor 484                          | 108124199 | 108125296 | TC0700004048.mm.1 | -0.1 | 0.508427 |
| TC1100003663.mm.1 | ENSMUST00000157324 | Gm24251 | predicted gene, 24251                           | 53886828  | 53886941  | TC0100002340.mm.1 | 0.1  | 0.509201 |
| TC1100003676.mm.1 | NM_197944          | Hsh2d   | hematopoietic SH2 domain containing             | 72189668  | 72200996  | TC0800000817.mm.1 | -0.1 | 0.50928  |
| TC1100003677.mm.1 | ENSMUST00000179680 | Gm10595 | predicted gene 10595                            | 41870187  | 41870612  | TC0400002483.mm.1 | 0.1  | 0.509516 |
| TC1100003681.mm.1 | ENSMUST00000180030 | Gm10595 | predicted gene 10595                            | 42219428  | 42219853  | TC0400002495.mm.1 | 0.1  | 0.509516 |
| TC1100003683.mm.1 | ENSMUST00000082972 | n-R5s20 | nuclear encoded rRNA 5S 204                     | 119631118 | 119631236 | TC0200001777.mm.1 | -0.1 | 0.509538 |
| TC1100003684.mm.1 | ENSMUST00000175018 | Gm25025 | predicted gene, 25025                           | 78050717  | 78050827  | TC1600000891.mm.1 | 0.1  | 0.509721 |
| TC1100003688.mm.1 | ENSMUST00000117933 | Gm15191 | predicted gene 15191                            | 151945368 | 151946367 | TC0X00001531.mm.1 | 0.1  | 0.50976  |
| TC1100003694.mm.1 | NM_012050          | Omd     | osteomodulin                                    | 49582747  | 49592611  | TC1300000568.mm.1 | 0.0  | 0.509829 |
| TC1100003696.mm.1 | NM_001001446       | Cyp2c44 | cytochrome P450, family 2, subfamily c, polypep | 44005022  | 44029247  | TC1900001550.mm.1 | 0.1  | 0.509957 |
| TC1100003704.mm.1 | NM_030599          | Klrb1b  | killer cell lectin-like receptor subfamily B me | 128813706 | 128826331 | TC0600003606.mm.1 | 0.0  | 0.510016 |
| TC1100003706.mm.1 | ENSMUST00000178831 | Gm24954 | predicted gene, 24954                           | 6343449   | 6343558   | TC0300001605.mm.1 | -0.1 | 0.510136 |
| TC1100003707.mm.1 | ENSMUST00000082537 | Gm23406 | predicted gene, 23406                           | 90602496  | 90602617  | TC1600000986.mm.1 | -0.4 | 0.510161 |
| TC1100003711.mm.1 | ENSMUST00000104347 | Gm22543 | predicted gene, 22543                           | 40306219  | 40306312  | TC1600000582.mm.1 | -0.1 | 0.51065  |
| TC1100003720.mm.1 | NM_009787          | Pdia4   | protein disulfide isomerase associated 4        | 47796141  | 47813512  | TC0600002212.mm.1 | 0.2  | 0.510684 |
| TC1100003721.mm.1 | ENSMUST00000082829 | Gm23515 | predicted gene, 23515                           | 65667701  | 65667701  | TC0800002324.mm.1 | 0.1  | 0.510708 |
| TC1100003724.mm.1 | ENSMUST00000104837 | Mir466d | microRNA 466d                                   | 10511967  | 10512062  | TC0200000192.mm.1 | 0.1  | 0.510932 |
| TC1100003725.mm.1 | ENSMUST00000095717 | Gm4795  | predicted pseudogene 4795                       | 45006110  | 45007117  | TC1000000420.mm.1 | -0.1 | 0.510977 |
| TC1100003726.mm.1 | ENSMUST00000118277 | Gm12098 | predicted gene 12098                            | 30568182  | 30568898  | TC1100002439.mm.1 | 0.1  | 0.511015 |
| TC1100003731.mm.1 | NM_027155          | 2310061 | RIKEN cDNA 2310061N02 gene                      | 88707171  | 88707962  | TC1600002011.mm.1 | -0.1 | 0.511093 |
| TC1100003732.mm.1 | ENSMUST00000179167 | Gm23307 | predicted gene, 23307                           | 39283976  | 39284080  | TC0700000701.mm.1 | -0.1 | 0.511187 |
| TC1100003733.mm.1 | NM_013823          | Kl      | klotho                                          | 150952607 | 150993817 | TC0500001876.mm.1 | 0.3  | 0.511312 |
| TC1100003734.mm.1 | XR_140909          | Gm10643 | predicted gene 10643                            | 84063558  | 84065137  | TC0800002567.mm.1 | 0.0  | 0.511335 |
| TC1100003735.mm.1 | NM_010226          | Foxs1   | forkhead box S1                                 | 152931894 | 152933208 | TC0200004919.mm.1 | 0.0  | 0.511408 |
| TC1100003736.mm.1 | XR_104780          | Gm19725 | predicted gene, 19725                           | 64850562  | 64867244  | TC0200000942.mm.1 | 0.0  | 0.511519 |
| TC1100003737.mm.1 | ENSMUST00000104168 | Gm26288 | predicted gene, 26288                           | 58148096  | 58148227  | TC0700000313.mm.1 | 0.2  | 0.511893 |
| TC1100003738.mm.1 | NM_019915          | Art2b   | ADP-ribosyltransferase 2b                       | 101578860 | 101581161 | TC0700003842.mm.1 | 0.1  | 0.511912 |
| TC1100003739.mm.1 | NM_010030          | Defb2   | defensin beta 2                                 | 21839926  | 21843482  | TC0800000261.mm.1 | -0.1 | 0.512004 |
| TC1100003740.mm.1 | NM_146193          | Btbd1   | BTB (POZ) domain containing 1                   | 81792074  | 81829464  | TC0700003618.mm.1 | 0.1  | 0.512159 |
| TC1100003742.mm.1 | NCBI_Gene:10012468 | Trbv21  | T cell receptor beta, variable 21               | 41202587  | 41203044  | TC0600000431.mm.1 | 0.0  | 0.512181 |
| TC1100003747.mm.1 | NM_177374          | Trmt61a | tRNA methyltransferase 61A                      | 111678105 | 111683902 | TC1200001243.mm.1 | 0.0  | 0.512256 |
| TC1100003757.mm.1 | XM_003689109       | Gm21524 | predicted gene, 21524                           | 69982876  | 69983559  | TC0Y00000441.mm.1 | 0.1  | 0.512321 |
| TC1100003758.mm.1 | XM_003689116       | Gm21715 | predicted gene, 21715                           | 74011477  | 74012160  | TC0Y00000463.mm.1 | 0.1  | 0.512321 |
| TC1100003760.mm.1 | XM_001478443       | Gm3873  | predicted gene 3873                             | 25033142  | 25033531  | TC1900000401.mm.1 | 0.2  | 0.512472 |
| TC1100003763.mm.1 | NM_134247          | Acot4   | acyl-CoA thioesterase 4                         | 84038379  | 84044723  | TC1200000799.mm.1 | 0.0  | 0.512513 |
| TC1100003768.mm.1 | XR_105293          | Gm7265  | predicted gene 7265                             | 72691550  | 72695054  | TC0900000978.mm.1 | 0.1  | 0.51257  |
| TC1100003772.mm.1 | NCBI_Gene:21640:pr | Tcrg-V6 | T cell receptor gamma, variable 6               | 19190368  | 19190929  | TC1300000140.mm.1 | 0.0  | 0.512736 |
| TC1100003774.mm.1 | ENSMUST00000120250 | Gm15703 | predicted gene 15703                            | 31924989  | 31925868  | TC1600000422.mm.1 | -0.1 | 0.513499 |
| TC1100003779.mm.1 | ENSMUST00000117788 | Gm11930 | predicted gene 11930                            | 33201764  | 33201953  | TC0400000281.mm.1 | -0.2 | 0.513703 |
| TC1100003781.mm.1 | NM_030717          | Lactb   | lactamase, beta                                 | 66955390  | 66975484  | TC0900002537.mm.1 | 0.0  | 0.513802 |
| TC1100003792.mm.1 | ENSMUST00000122474 | Gm25109 | predicted gene, 25109                           | 94517162  | 94517275  | TC1300001064.mm.1 | -0.1 | 0.513875 |
| TC1100003793.mm.1 | NR_037220          | Mir3060 | microRNA 3060                                   | 4139364   | 4139446   | TC1100000036.mm.1 | 0.1  | 0.51388  |
| TC1100003794.mm.1 | NM_001085541       | Gm13128 | predicted gene 13128                            | 144330249 | 144333465 | TC0400001847.mm.1 | -0.1 | 0.514076 |
| TC1100003799.mm.1 | ENSMUST00000158681 | Gm24842 | predicted gene, 24842                           | 109988078 | 109988131 | TC0700001618.mm.1 | -0.1 | 0.514202 |
| TC1100003802.mm.1 | ENSMUST00000082415 | mt-Th   | mitochondrially encoded tRNA histidine          | 11546     | 11612     | TC0M00000014.mm.1 | -0.3 | 0.514223 |
| TC1100003808.mm.1 | NM_153513          | BC02852 | cDNA sequence BC028528                          | 95883954  | 95892005  | TC0300002490.mm.1 | 0.1  | 0.514323 |
| TC1100003811.mm.1 | ENSMUST00000184689 | PCGEM1  | Prostate-specific transcript 1                  | 50222389  | 50222520  | TC0100002301.mm.1 | 0.1  | 0.514477 |
| TC1100003822.mm.1 | NM_025968          | Ptgr1   | prostaglandin reductase 1                       | 58965439  | 58987119  | TC0400002744.mm.1 | 0.0  | 0.514537 |

|                   |                    |         |                                                  |           |           |                    |      |          |
|-------------------|--------------------|---------|--------------------------------------------------|-----------|-----------|--------------------|------|----------|
| TC1100003842.mm.1 | XM_001475283       | Gm2888  | predicted gene 2888                              | 3030002   | 3038762   | TC1400000001.mm.1  | 0.0  | 0.514658 |
| TC1100003846.mm.1 | NM_008033          | Fnta    | farnesyltransferase, CAAX box, alpha             | 25998722  | 26015608  | TC0800001927.mm.1  | 0.1  | 0.514721 |
| TC1100003850.mm.1 | NM_012002          | Cops6   | COP9 (constitutive photomorphogenic) homolog     | 138161071 | 138164646 | TC0500001643.mm.1  | -0.1 | 0.514997 |
| TC1100003876.mm.1 | ENSMUST00000104323 | Gm25875 | predicted gene, 25875                            | 60084788  | 60084894  | TC1500000442.mm.1  | -0.1 | 0.515021 |
| TC1100003883.mm.1 | ENSMUST00000083935 | Gm24917 | predicted gene, 24917                            | 22868901  | 22869004  | TC1100000230.mm.1  | -0.2 | 0.515138 |
| TC1100003888.mm.1 | ENSMUST00000175833 | Vmn2r-p | vomeronasal 2, receptor, pseudogene 12           | 64744749  | 64745645  | TC03000002090.mm.1 | 0.0  | 0.515231 |
| TC1100003902.mm.1 | ENSMUST00000102372 | Gm26338 | predicted gene, 26338                            | 128094917 | 128095026 | TC0600003189.mm.1  | 0.0  | 0.51534  |
| TC1100003904.mm.1 | NM_001081163       | Chsy1   | chondroitin sulfate synthase 1                   | 66109515  | 66173798  | TC0700000991.mm.1  | -0.1 | 0.515489 |
| TC1100003919.mm.1 | NR_030426          | Mir667  | microRNA 667                                     | 109720006 | 109720097 | TC1200001180.mm.1  | -0.1 | 0.515587 |
| TC1100003920.mm.1 | NM_001177427       | Eid2b   | EP300 interacting inhibitor of differentiation   | 28277706  | 28280129  | TC0700000494.mm.1  | 0.0  | 0.515633 |
| TC1100003941.mm.1 | ENSMUST00000099799 | Olfr121 | olfactory receptor 1217                          | 89022995  | 89024099  | TC0200004037.mm.1  | 0.0  | 0.515634 |
| TC1100003962.mm.1 | NM_013512          | Epb4.1l | erythrocyte protein band 4.1-like 4a             | 33796327  | 34007206  | TC1800001141.mm.1  | 0.0  | 0.515935 |
| TC1100003978.mm.1 | NM_007449          | Ang2    | angiogenin, ribonuclease A family, member 2      | 51195486  | 51195923  | TC1400002001.mm.1  | 0.0  | 0.516042 |
| TC1100003982.mm.1 | NM_028625          | Lce1a2  | late cornified envelope 1A2                      | 92668613  | 92670315  | TC0300002403.mm.1  | -0.1 | 0.516187 |
| TC1100003984.mm.1 | NM_001254747       | Il15    | interleukin 15                                   | 82331624  | 82403222  | TC08000002542.mm.1 | 0.0  | 0.516232 |
| TC1100003988.mm.1 | NM_001164437       | Tmem212 | transmembrane protein 212                        | 27866065  | 27896368  | TC0300001765.mm.1  | 0.1  | 0.516371 |
| TC1100003991.mm.1 | ENSMUST00000119314 | Gm13915 | predicted gene 13915                             | 108572594 | 108573524 | TC14000001616.mm.1 | -0.1 | 0.516413 |
| TC1100004000.mm.1 | NM_021511          | Rrs1    | RRS1 ribosome biogenesis regulator homolog (S.   | 9545408   | 9547455   | TC0100000038.mm.1  | 0.0  | 0.516586 |
| TC1100004002.mm.1 | ENSMUST00000157643 | Gm24776 | predicted gene, 24776                            | 72971179  | 72971264  | TC0500002584.mm.1  | 0.1  | 0.516587 |
| TC1100004035.mm.1 | NM_013897          | Timm8b  | translocase of inner mitochondrial membrane 8l   | 50603901  | 50614192  | TC0900000601.mm.1  | -0.1 | 0.517138 |
| TC1100004039.mm.1 | ENSMUST00000175407 | Gm23375 | predicted gene, 23375                            | 133761688 | 133761770 | TC0600003293.mm.1  | -0.1 | 0.517162 |
| TC1100004045.mm.1 | ENSMUST00000122476 | Gm25104 | predicted gene, 25104                            | 37267076  | 37267238  | TC1700002062.mm.1  | 0.0  | 0.517496 |
| TC1100004051.mm.1 | ENSMUST00000167374 | Ripk1   | receptor (TNFRSF)-interacting serine-threonine   | 34002363  | 34037147  | TC1300000384.mm.1  | 0.1  | 0.517578 |
| TC1100004053.mm.1 | NM_001081168       | Sap30l  | SAP30-like                                       | 57801637  | 57810615  | TC1100000668.mm.1  | 0.1  | 0.518593 |
| TC1100004054.mm.1 | NR_037252          | Mir467a | microRNA 467a-3                                  | 10483678  | 10483760  | TC0200000125.mm.1  | -0.1 | 0.518668 |
| TC1100004056.mm.1 | ENSMUST00000177790 | mmu-mir | mmu-mir-467a-3 // mmu-mir-467a-6 // mmu-n        | 10491048  | 10491130  | TC0200000143.mm.1  | -0.1 | 0.518668 |
| TC1100004057.mm.1 | NR_037267 // NR_   | Mir467a | microRNA 467a-10 // microRNA 467a-6              | 10503273  | 10503355  | TC0200000173.mm.1  | -0.1 | 0.518668 |
| TC1100004084.mm.1 | ENSMUST00000158490 | Gm25905 | predicted gene, 25905                            | 118834900 | 118835000 | TC0600001331.mm.1  | 0.1  | 0.518833 |
| TC1100004088.mm.1 | ENSMUST00000122704 | Gm26091 | predicted gene, 26091                            | 104601158 | 104601239 | TC0300002652.mm.1  | 0.1  | 0.518864 |
| TC1100004099.mm.1 | ENSMUST00000074239 | Gm5915  | predicted pseudogene 5915                        | 105660334 | 105660787 | TC0800002830.mm.1  | -0.2 | 0.518918 |
| TC1100004101.mm.1 | ENSMUST00000157768 | Gm26308 | predicted gene, 26308                            | 128377831 | 128377899 | TC1000003141.mm.1  | 0.1  | 0.518964 |
| TC1100004102.mm.1 | XM_001001188       | Scgb1b1 | secretoglobulin, family 1B, member 12            | 32334198  | 32335382  | TC0700000596.mm.1  | 0.1  | 0.518972 |
| TC1100004106.mm.1 | NM_012014          | Gprn1   | G protein-regulated inducer of neurite outgrowth | 54736671  | 54749874  | TC1300002040.mm.1  | 0.0  | 0.51908  |
| TC1100004110.mm.1 | ENSMUST00000122571 | U2      | U2 spliceosomal RNA                              | 50830     | 50978     | TC4_GL456216_rand  | 0.1  | 0.519263 |
| TC1100004113.mm.1 | NM_025570          | Mrpl20  | mitochondrial ribosomal protein L20              | 155802878 | 155809975 | TC0400002091.mm.1  | 0.0  | 0.519453 |
| TC1100004114.mm.1 | NM_201640          | Cyp4a31 | cytochrome P450, family 4, subfamily a, polypep  | 115563649 | 115579015 | TC0400001229.mm.1  | 0.2  | 0.519702 |
| TC1100004118.mm.1 | NM_013518          | Fgf9    | fibroblast growth factor 9                       | 58070547  | 58112720  | TC1400000829.mm.1  | 0.0  | 0.520001 |
| TC1100004122.mm.1 | ENSMUST00000122693 | Gm24384 | predicted gene, 24384                            | 63909082  | 63909156  | TC1800001454.mm.1  | 0.0  | 0.520069 |
| TC1100004123.mm.1 | ENSMUST00000158189 | Gm22385 | predicted gene, 22385                            | 113403088 | 113403188 | TC1300001288.mm.1  | 0.1  | 0.520264 |
| TC1100004127.mm.1 | NM_001081381       | Elp6    | elongator acetyltransferase complex subunit 6    | 110305192 | 110322102 | TC0900001458.mm.1  | 0.0  | 0.520342 |
| TC1100004152.mm.1 | NM_008929          | Dnajc3  | Dnaj (Hsp40) homolog, subfamily C, member 3      | 11897932  | 118981702 | TC1700001290.mm.1  | -0.1 | 0.520495 |
| TC1100004153.mm.1 | NM_013474          | Apoa2   | apolipoprotein A-II                              | 171225054 | 171226379 | TC0100001580.mm.1  | -0.1 | 0.520549 |
| TC1100004157.mm.1 | ENSMUST00000177997 | Gm24754 | predicted gene, 24754                            | 46018067  | 46018173  | TC1600001673.mm.1  | -0.1 | 0.520768 |
| TC1100004158.mm.1 | ENSMUST00000157688 | Gm26182 | predicted gene, 26182                            | 119526544 | 119526659 | TC0X00002907.mm.1  | 0.1  | 0.520809 |
| TC1100004159.mm.1 | ENSMUST00000119445 | Gm13444 | predicted gene 13444                             | 35483384  | 35483905  | TC0200003368.mm.1  | 0.0  | 0.521057 |
| TC1100004160.mm.1 | ENSMUST00000117312 | Gm14509 | predicted gene 14509                             | 8971505   | 8972790   | TC0X00000099.mm.1  | -0.1 | 0.52112  |
| TC1100004167.mm.1 | NM_009640          | Angpt1  | angiopoietin 1                                   | 42424667  | 42676977  | TC1500001450.mm.1  | -0.1 | 0.52133  |
| TC1100004168.mm.1 | ENSMUST00000184727 | AC10723 | N/A                                              | 47591668  | 47591747  | TC0800000553.mm.1  | -0.1 | 0.521331 |
| TC1100004182.mm.1 | NM_010153          | ErbB3   | v-erb-b2 erythroblastic leukemia viral oncogene  | 128567523 | 128589652 | TC1000003153.mm.1  | -0.1 | 0.521351 |
| TC1100004183.mm.1 | NM_028768          | Armc8   | armadillo repeat containing 8                    | 99478391  | 99568899  | TC0900002922.mm.1  | 0.0  | 0.521436 |
| TC1100004201.mm.1 | ENSMUST00000083030 | Gm25147 | predicted gene, 25147                            | 18158687  | 18158791  | TC15000006297.mm.1 | -0.1 | 0.521721 |
| TC1100004212.mm.1 | ENSMUST00000078264 | Olfr137 | olfactory receptor 1373                          | 52144593  | 52145528  | TC1100002712.mm.1  | 0.1  | 0.521741 |
| TC1100004217.mm.1 | NM_080560          | Ube2n   | ubiquitin-conjugating enzyme E2N                 | 95515162  | 95545658  | TC1000001162.mm.1  | 0.1  | 0.52176  |
| TC1100004228.mm.1 | NM_009692          | Apoa1   | apolipoprotein A-I                               | 46228580  | 46230469  | TC0900000559.mm.1  | -0.1 | 0.521796 |
| TC1100004231.mm.1 | XR_106226          | A430108 | RIKEN cDNA A430108G06 gene                       | 53564668  | 53567313  | TC1100002736.mm.1  | 0.0  | 0.522065 |
| TC1100004243.mm.1 | NM_008197          | H1f0    | H1 histone family, member 0                      | 79028212  | 79030504  | TC1500000662.mm.1  | 0.1  | 0.522244 |
| TC1100004245.mm.1 | ENSMUST00000175997 | Vmn2r-p | vomeronasal 2, receptor, pseudogene 116          | 18763265  | 18763390  | TC1700000225.mm.1  | 0.0  | 0.522371 |
| TC1100004248.mm.1 | NM_009789          | S100g   | S100 calcium binding protein G                   | 162961992 | 162964599 | TC0X00003316.mm.1  | 0.3  | 0.522417 |
| TC1100004249.mm.1 | ENSMUST00000118508 | Gm13146 | predicted gene 13146                             | 147187708 | 147188487 | TC0400001901.mm.1  | -0.1 | 0.522517 |
| TC1100004257.mm.1 | ENSMUST00000099454 | Al60618 | expressed sequence Al606181                      | 41593363  | 41596158  | TC1900000593.mm.1  | -0.1 | 0.522841 |
| TC1100004258.mm.1 | ENSMUST00000083055 | Gm23242 | predicted gene, 23242                            | 110428157 | 110428263 | TC1400002687.mm.1  | 0.1  | 0.522885 |
| TC1100004259.mm.1 | NM_134174          | Vmn1r5  | vomeronasal 1 receptor 5                         | 56985295  | 56986350  | TC0600000681.mm.1  | -0.1 | 0.522977 |
| TC1100004261.mm.1 | NM_001162381       | Fam166b | family with sequence similarity 166, member B    | 43427019  | 43429134  | TC0400002522.mm.1  | 0.0  | 0.523066 |
| TC1100004262.mm.1 | ENSMUST00000102345 | Gm23060 | predicted gene, 23060                            | 34395647  | 34395755  | TC1900001417.mm.1  | -0.1 | 0.523074 |
| TC1100004265.mm.1 | ENSMUST00000158184 | Gm24078 | predicted gene, 24078                            | 22747131  | 22747233  | TC0400000198.mm.1  | -0.1 | 0.52315  |
| TC1100004266.mm.1 | ENSMUST00000083239 | Gm22127 | predicted gene, 22127                            | 36722882  | 36722987  | TC1100000391.mm.1  | -0.3 | 0.523503 |
| TC1100004270.mm.1 | NM_026194          | Ufl1    | UFM1 specific ligase 1                           | 25248586  | 25281821  | TC0400002316.mm.1  | 0.1  | 0.524081 |
| TC1100004277.mm.1 | NM_001025432       | Crebbp  | CREB binding protein                             | 4084048   | 4213404   | TC1600001117.mm.1  | -0.1 | 0.524188 |
| TC1100004280.mm.1 | ENSMUST00000070435 | Fabp3-p | fatty acid binding protein 3, muscle and heart,  | 86731754  | 86732409  | TC1000002628.mm.1  | -0.2 | 0.524304 |
| TC1100004290.mm.1 | ENSMUST00000180559 | ENSMUSG | ---                                              | 70661248  | 70662108  | TC0200003710.mm.1  | 0.0  | 0.524422 |
| TC1100004292.mm.1 | NM_177073          | Relt    | RELt tumor necrosis factor receptor              | 100845848 | 100863446 | TC0700003826.mm.1  | 0.0  | 0.524558 |
| TC1100004295.mm.1 | NCBI_Gene:236047:p | Igkv4-7 | immunoglobulin kappa variable 4-74               | 69184825  | 69185366  | TC0600003557.mm.1  | -0.4 | 0.524704 |
| TC1100004296.mm.1 | NM_011828          | Hs2st1  | heparan sulfate 2-O-sulfotransferase 1           | 144431103 | 144570216 | TC0300003071.mm.1  | 0.0  | 0.524713 |
| TC1100004301.mm.1 | ENSMUST00000121403 | Gm11954 | predicted gene 11954                             | 4002457   | 4002805   | TC1100000031.mm.1  | -0.1 | 0.524886 |
| TC1100004302.mm.1 | ENSMUST00000185192 | AC15384 | N/A                                              | 45537244  | 45537350  | TC1000000429.mm.1  | 0.2  | 0.524926 |
| TC1200000015.mm.1 | ENSMUST00000173709 | Gm7031  | predicted gene 7031                              | 37175854  | 37176772  | TC1700000760.mm.1  | -0.1 | 0.525202 |
| TC1200000021.mm.1 | ENSMUST00000083106 | Gm24977 | predicted gene, 24977                            | 25566660  | 25566822  | TC0400002320.mm.1  | -0.1 | 0.525258 |
| TC1200000030.mm.1 | NM_023697          | Rdh14   | retinol dehydrogenase 14 (all-trans and 9-cis)   | 10390780  | 10395562  | TC1200000086.mm.1  | -0.1 | 0.525319 |

|                   |                    |          |                                                 |           |           |                   |      |          |
|-------------------|--------------------|----------|-------------------------------------------------|-----------|-----------|-------------------|------|----------|
| TC1200000031.mm.1 | ENSMUST00000177308 | Gm18588  | predicted gene, 18588                           | 68902267  | 68902758  | TC0300002124.mm.1 | 0.1  | 0.525967 |
| TC1200000033.mm.1 | ENSMUST00000116834 | Gm25233  | predicted gene, 25233                           | 6370870   | 6370960   | TC0500001917.mm.1 | 0.1  | 0.526031 |
| TC1200000046.mm.1 | ENSMUST00000116765 | Gm26469  | predicted gene, 26469                           | 169061120 | 169061240 | TC0200002620.mm.1 | 0.2  | 0.526332 |
| TC1200000056.mm.1 | ENSMUST00000103970 | Gm24578  | predicted gene, 24578                           | 12333776  | 12333904  | TC1400001454.mm.1 | 0.1  | 0.526644 |
| TC1200000057.mm.1 | NR_037280          | Mir3097  | microRNA 3097                                   | 35021049  | 35021115  | TC0500000388.mm.1 | -0.1 | 0.526646 |
| TC1200000061.mm.1 | ENSMUST00000157819 | Gm22187  | predicted gene, 22187                           | 151059955 | 151060083 | TC0200002236.mm.1 | -0.1 | 0.526668 |
| TC1200000071.mm.1 | ENSMUST00000116699 | Gm24590  | predicted gene, 24590                           | 62598892  | 62599010  | TC1200001825.mm.1 | 0.1  | 0.526891 |
| TC1200000074.mm.1 | ENSMUST00000116172 | Gm11175  | predicted gene 11175                            | 70699538  | 70700080  | TC0800002401.mm.1 | 0.0  | 0.527025 |
| TC1200000075.mm.1 | ENSMUST00000171202 | Gm17027  | predicted gene 17027                            | 42157290  | 42162622  | TC1400001819.mm.1 | 0.0  | 0.527062 |
| TC1200000082.mm.1 | ENSMUST00000103768 | Mir297a  | microRNA 297a-3                                 | 10515820  | 10515921  | TC0200000200.mm.1 | 0.1  | 0.527332 |
| TC1200000086.mm.1 | ENSMUST00000175299 | Gm26141  | predicted gene, 26141                           | 158740138 | 158740263 | TC0200002441.mm.1 | -0.1 | 0.527608 |
| TC1200000095.mm.1 | ENSMUST00000118736 | Olfr111  | olfactory receptor 1117, pseudogene 1           | 87284352  | 87285272  | TC0200001283.mm.1 | 0.1  | 0.527798 |
| TC1200000096.mm.1 | ENSMUST00000163460 | Gm13394  | predicted gene 13394                            | 28933475  | 28934652  | TC0200003240.mm.1 | 0.1  | 0.527955 |
| TC1200000097.mm.1 | ENSMUST00000178937 | Gm23726  | predicted gene, 23726                           | 18069326  | 18069392  | TC0300000119.mm.1 | 0.2  | 0.528186 |
| TC1200000100.mm.1 | ENSMUST00000179099 | Gm25570  | predicted gene, 25570                           | 105399719 | 105399798 | TC0600001178.mm.1 | -0.1 | 0.52854  |
| TC1200000106.mm.1 | NM_175451          | Ckap4    | cytoskeleton-associated protein 4               | 84526305  | 84534036  | TC1000002594.mm.1 | 0.0  | 0.528598 |
| TC1200000110.mm.1 | ENSMUST00000102327 | Gm24271  | predicted gene, 24271                           | 44922177  | 44922177  | TC1000002106.mm.1 | 0.1  | 0.528606 |
| TC1200000114.mm.1 | NM_026636          | Babam1   | BRISC and BRCA1 A complex member 1              | 71396855  | 71404772  | TC0800000786.mm.1 | 0.1  | 0.528746 |
| TC1200000115.mm.1 | ENSMUST00000178311 | Akl3l2-p | adenylate kinase 3-like 2, pseudogene           | 72633868  | 72634767  | TC0200001060.mm.1 | -0.1 | 0.528995 |
| TC1200000118.mm.1 | ENSMUST00000122698 | Gm24382  | predicted gene, 24382                           | 60127641  | 60127747  | TC0300002060.mm.1 | -0.1 | 0.529282 |
| TC1200000122.mm.1 | NM_022417          | Itm2c    | integral membrane protein 2C                    | 85894281  | 85908699  | TC0100000774.mm.1 | 0.1  | 0.529541 |
| TC1200000130.mm.1 | ENSMUST00000158402 | Gm25013  | predicted gene, 25013                           | 120609966 | 120610093 | TC0300002834.mm.1 | 0.1  | 0.529541 |
| TC1200000132.mm.1 | ENSMUST00000102368 | Gm26339  | predicted gene, 26339                           | 42274964  | 42275062  | TC1900000615.mm.1 | 0.1  | 0.529733 |
| TC1200000135.mm.1 | NCBI_Gene:668395:p | Ighv5-1  | immunoglobulin heavy variable 5-12              | 113702124 | 113702578 | TC1200002562.mm.1 | -0.3 | 0.529799 |
| TC1200000140.mm.1 | NCBI_Gene:380809:p | Ighv10-  | immunoglobulin heavy variable V10-3             | 114523441 | 114523887 | TC1200002603.mm.1 | -0.3 | 0.529845 |
| TC1200000141.mm.1 | ENSMUST00000116911 | Gm26042  | predicted gene, 26042                           | 165024345 | 165024456 | TC0100001513.mm.1 | 0.1  | 0.529853 |
| TC1200000142.mm.1 | NR_030549          | Mir193b  | microRNA 193b                                   | 13449601  | 13449601  | TC0300000157.mm.1 | -0.1 | 0.529881 |
| TC1200000143.mm.1 | ENSMUST00000167475 | Gm3760   | predicted gene 3760                             | 7498713   | 7506148   | TC1400001428.mm.1 | 0.0  | 0.530373 |
| TC1200000145.mm.1 | NM_028038          | Ddx28    | DEAD (Asp-Glu-Ala-Asp) box polypeptide 28       | 106009616 | 106011882 | TC0800002848.mm.1 | -0.1 | 0.530404 |
| TC1200000152.mm.1 | ENSMUST00000164484 | Gm8237   | predicted gene 8237                             | 5857918   | 5880382   | TC1400001402.mm.1 | 0.0  | 0.530587 |
| TC1200000153.mm.1 | ENSMUST00000082622 | Gm24625  | predicted gene, 24625                           | 62521023  | 62521152  | TC1400000881.mm.1 | -0.1 | 0.530615 |
| TC1200000155.mm.1 | ENSMUST00000083709 | Gm25897  | predicted gene, 25897                           | 99803020  | 99803126  | TC1500002224.mm.1 | -0.1 | 0.530617 |
| TC1200000156.mm.1 | NM_133983          | Cd276    | CD276 antigen                                   | 58524298  | 58555132  | TC0900002396.mm.1 | 0.1  | 0.530657 |
| TC1200000169.mm.1 | NM_001164574       | Kbtbd3   | kelch repeat and BTB (POZ) domain containing 3  | 4309743   | 4331732   | TC0900000025.mm.1 | 0.0  | 0.530914 |
| TC1200000170.mm.1 | NM_001101631       | Gm3285   | predicted gene 3285                             | 77861975  | 77862638  | TC1000000770.mm.1 | -0.1 | 0.531101 |
| TC1200000172.mm.1 | ENSMUST00000157715 | Gm22338  | predicted gene, 22338                           | 61492766  | 61492894  | TC0200000920.mm.1 | -0.1 | 0.531178 |
| TC1200000175.mm.1 | NM_017399          | Fabp1    | fatty acid binding protein 1, liver             | 71199827  | 71205023  | TC0600000821.mm.1 | -0.1 | 0.531396 |
| TC1200000176.mm.1 | ENSMUST00000158019 | Gm26485  | predicted gene, 26485                           | 16823249  | 16823312  | TC0300001679.mm.1 | -0.2 | 0.531553 |
| TC1200000177.mm.1 | NM_001080742       | Vamp5    | vesicle-associated membrane protein 5           | 72368049  | 72380468  | TC0600002487.mm.1 | 0.0  | 0.531705 |
| TC1200000181.mm.1 | NM_173051          | Serpinb  | serine (or cysteine) peptidase inhibitor, clade | 32881397  | 32898161  | TC1300001764.mm.1 | -0.1 | 0.531713 |
| TC1200000182.mm.1 | ENSMUST00000157911 | Gm23278  | predicted gene, 23278                           | 87346245  | 87346387  | TC1400001124.mm.1 | -0.1 | 0.532318 |
| TC1200000183.mm.1 | NM_010124          | Eif4ebp  | eukaryotic translation initiation factor 4E bin | 61432493  | 61452766  | TC1000003224.mm.1 | 0.0  | 0.532537 |
| TC1200000184.mm.1 | ENSMUST00000104545 | Gm23608  | predicted gene, 23608                           | 10075653  | 10075780  | TC0200002944.mm.1 | 0.1  | 0.532719 |
| TC1200000189.mm.1 | ENSMUST00000082410 | mt-Tg    | mitochondrially encoded tRNA glycine            | 9391      | 9458      | TC0M00000010.mm.1 | -0.1 | 0.532755 |
| TC1200000190.mm.1 | NM_013848          | Ermap    | erythroblast membrane-associated protein        | 119175457 | 119190011 | TC0400003418.mm.1 | 0.0  | 0.532839 |
| TC1200000197.mm.1 | NR_033123          | 4933409  | RIKEN cDNA 4933409K07 gene                      | 42031296  | 42055130  | TC0400002488.mm.1 | 0.0  | 0.533033 |
| TC1200000201.mm.1 | ENSMUST00000179816 | Gm22289  | predicted gene, 22289                           | 59904755  | 59904848  | TC0700003341.mm.1 | -0.1 | 0.533047 |
| TC1200000203.mm.1 | ENSMUST00000157855 | Gm23643  | predicted gene, 23643                           | 3770741   | 3770804   | TC1800000925.mm.1 | 0.1  | 0.533737 |
| TC1200000217.mm.1 | NM_001010827       | Taar7b   | trace amine-associated receptor 7B              | 23999938  | 24001015  | TC1000000199.mm.1 | -0.1 | 0.533821 |
| TC1200000225.mm.1 | ENSMUST00000158055 | Gm23997  | predicted gene, 23997                           | 7259941   | 7260061   | TC1900000133.mm.1 | 0.1  | 0.534007 |
| TC1200000231.mm.1 | NM_023815          | Trp53rk  | transformation related protein 53 regulating ki | 166792531 | 166799505 | TC0200002574.mm.1 | 0.0  | 0.534067 |
| TC1200000239.mm.1 | ENSMUST00000121490 | Gm5578   | predicted pseudogene 5578                       | 112605544 | 112606779 | TC0600001235.mm.1 | -0.1 | 0.534183 |
| TC1200000255.mm.1 | NM_133735          | Ptcd1    | pentatricopeptide repeat domain 1               | 145147378 | 145167108 | TC0500003590.mm.1 | 0.0  | 0.5342   |
| TC1200000258.mm.1 | NM_013831          | Pstpip2  | proline-serine-threonine phosphatase-interactin | 77789913  | 77882879  | TC1800000834.mm.1 | 0.1  | 0.534234 |
| TC1200000260.mm.1 | ENSMUST00000119288 | Gm12345  | predicted gene 12345                            | 77149628  | 77150525  | TC1100001113.mm.1 | -0.1 | 0.534334 |
| TC1200000263.mm.1 | NM_007825          | Cyp7b1   | cytochrome P450, family 7, subfamily b, polypep | 18071950  | 18243338  | TC0300001689.mm.1 | 0.0  | 0.534616 |
| TC1200000274.mm.1 | NM_010386          | H2-DMa   | histocompatibility 2, class II, locus DMA       | 34122832  | 34139101  | TC1700000618.mm.1 | -0.1 | 0.534694 |
| TC1200000278.mm.1 | NM_001101630       | Gm3238   | predicted gene 3238                             | 77770633  | 77771325  | TC1000002428.mm.1 | -0.1 | 0.534852 |
| TC1200000279.mm.1 | ENSMUST00000117436 | Gm13400  | predicted gene 13400                            | 30923978  | 30924357  | TC0200003279.mm.1 | 0.0  | 0.534907 |
| TC1200000285.mm.1 | ENSMUST00000117799 | Gm13036  | predicted gene 13036                            | 146058776 | 146059523 | TC0400001876.mm.1 | 0.0  | 0.534924 |
| TC1200000294.mm.1 | NM_175118          | Dusp28   | dual specificity phosphatase 28                 | 92906989  | 92908620  | TC0100000919.mm.1 | -0.1 | 0.535275 |
| TC1200000300.mm.1 | NM_008437          | Napsa    | napsin A aspartic peptidase                     | 44572432  | 44586862  | TC0700000810.mm.1 | 0.3  | 0.53536  |
| TC1200000304.mm.1 | NM_175431          | Fam228b  | family with sequence similarity 228, member B   | 4746216   | 4769267   | TC1200001364.mm.1 | 0.0  | 0.535391 |
| TC1200000308.mm.1 | NM_009997          | Cyp2a4   | cytochrome P450, family 2, subfamily a, polypep | 26307169  | 26315088  | TC0700000439.mm.1 | 0.2  | 0.535406 |
| TC1200000316.mm.1 | NM_020510          | Fzd2     | frizzled homolog 2 (Drosophila)                 | 102604396 | 102608058 | TC1100001694.mm.1 | 0.0  | 0.535521 |
| TC1200000319.mm.1 | NM_008148          | Gp5      | glycoprotein 5 (platelet)                       | 30307685  | 30310781  | TC1600001460.mm.1 | 0.0  | 0.535904 |
| TC1200000328.mm.1 | ENSMUST00000121711 | Gm13419  | predicted gene 13419                            | 34830930  | 34831110  | TC0200000624.mm.1 | -0.1 | 0.536068 |
| TC1200000348.mm.1 | ENSMUST00000120625 | Gm14026  | predicted gene 14026                            | 129168700 | 129170488 | TC0200001949.mm.1 | 0.1  | 0.536104 |
| TC1200000352.mm.1 | ENSMUST00000184926 | AC13170  | N/A                                             | 60699179  | 60699291  | TC1600001820.mm.1 | 0.1  | 0.536149 |
| TC1200000353.mm.1 | NM_001253814       | Ankle2   | ankyrin repeat and LEM domain containing 2      | 110231004 | 110256651 | TC0500001136.mm.1 | -0.1 | 0.536293 |
| TC1200000383.mm.1 | ENSMUST00000111364 | AC12514  | N/A                                             | 123792    | 124928    | TC1_GL456210_rand | -0.3 | 0.536476 |
| TC1200000385.mm.1 | NCBI_Gene:628072:p | Igkv14-  | immunoglobulin kappa variable 14-130            | 67791046  | 67791511  | TC0600003508.mm.1 | -0.1 | 0.536488 |
| TC1200000387.mm.1 | NM_023053          | Twsg1    | twisted gastrulation homolog 1 (Drosophila)     | 65921972  | 65951187  | TC1700002418.mm.1 | 0.1  | 0.536543 |
| TC1200000406.mm.1 | ENSMUST00000120693 | Gm12431  | predicted gene 12431                            | 98842871  | 98843038  | TC0300002563.mm.1 | 0.1  | 0.536705 |
| TC1200000407.mm.1 | XM_003689106       | Gm21470  | predicted gene, 21470                           | 86943636  | 86944319  | TC0Y00000537.mm.1 | 0.0  | 0.536937 |
| TC1200000414.mm.1 | NR_030559          | Mir453   | microRNA 453                                    | 109735619 | 109735700 | TC1200001193.mm.1 | 0.1  | 0.536982 |
| TC1200000419.mm.1 | NM_177574          | Vps37d   | vacuolar protein sorting 37D (yeast)            | 135072900 | 135078266 | TC0500003390.mm.1 | 0.0  | 0.536992 |
| TC1200000429.mm.1 | ENSMUST00000082485 | Gm22249  | predicted gene, 22249                           | 38546458  | 38546593  | TC0500000441.mm.1 | 0.0  | 0.537166 |

|                   |                    |          |                                                 |           |           |                   |      |          |
|-------------------|--------------------|----------|-------------------------------------------------|-----------|-----------|-------------------|------|----------|
| TC1200000445.mm.1 | NM_019396          | Cyhr1    | cysteine and histidine rich 1                   | 76643395  | 76660208  | TC1500001785.mm.1 | 0.0  | 0.537227 |
| TC1200000450.mm.1 | NM_001164327       | Phf11b   | PHD finger protein 11B                          | 59320964  | 59341335  | TC1400002162.mm.1 | -0.2 | 0.537245 |
| TC1200000451.mm.1 | NCBI_Gene:435321:p | Ighv12-  | immunoglobulin heavy variable V12-3             | 114366526 | 114366954 | TC1200002594.mm.1 | -0.2 | 0.537696 |
| TC1200000452.mm.1 | NM_001039039       | Kctd21   | potassium channel tetramerisation domain cont   | 97332323  | 97350216  | TC0700001347.mm.1 | 0.1  | 0.537771 |
| TC1200000453.mm.1 | ENSMUST00000083018 | Gm24920  | predicted gene, 24920                           | 95090625  | 95090709  | TC0300002464.mm.1 | -0.2 | 0.537779 |
| TC1200000464.mm.1 | OTTMUST00000098038 | RP23-14  | ---                                             | 5415565   | 5415759   | TC1900000963.mm.1 | 0.1  | 0.53785  |
| TC1200000466.mm.1 | NM_001048054       | Dusp16   | dual specificity phosphatase 16                 | 134715468 | 134792628 | TC0600003307.mm.1 | 0.0  | 0.537869 |
| TC1200000467.mm.1 | NM_026738          | 1110007  | RIKEN cDNA 1110007C09 gene                      | 49202951  | 49216026  | TC1300001954.mm.1 | 0.0  | 0.538026 |
| TC1200000471.mm.1 | ENSMUST00000083379 | Gm26062  | predicted gene, 26062                           | 18549085  | 18549191  | TC0700000266.mm.1 | 0.1  | 0.538203 |
| TC1200000474.mm.1 | NR_029600          | Mir122a  | microRNA 122a                                   | 65248861  | 65248926  | TC1800000668.mm.1 | 0.1  | 0.538275 |
| TC1200000499.mm.1 | NCBI_Gene:641178:p | Ighv5-9  | immunoglobulin heavy variable 5-9-1             | 113736111 | 113736570 | TC1200002564.mm.1 | -0.3 | 0.538333 |
| TC1200000500.mm.1 | ENSMUST00000157083 | Gm23000  | predicted gene, 23000                           | 66728415  | 66728553  | TC0X00000597.mm.1 | 0.1  | 0.538428 |
| TC1200000501.mm.1 | NR_029647          | Mir297-  | microRNA 297-1                                  | 34645144  | 34653574  | TC1400001733.mm.1 | 0.2  | 0.5386   |
| TC1200000502.mm.1 | NM_001039646       | Gbp10    | guanylate-binding protein 10                    | 105215525 | 105293699 | TC0500002895.mm.1 | -0.1 | 0.538733 |
| TC1200000504.mm.1 | XM_985542          | Gm8246   | predicted gene 8246                             | 5469438   | 5477830   | TC1400001394.mm.1 | 0.1  | 0.538764 |
| TC1200000505.mm.1 | NM_027002          | Polr2d   | polymerase (RNA) II (DNA directed) polypeptide  | 31789159  | 31796701  | TC1800000243.mm.1 | -0.1 | 0.538865 |
| TC1200000507.mm.1 | ENSMUST00000083433 | Gm24410  | predicted gene, 24410                           | 27421324  | 27421430  | TC0800001960.mm.1 | 0.0  | 0.538922 |
| TC1200000516.mm.1 | ENSMUST00000083217 | Gm25480  | predicted gene, 25480                           | 66544061  | 66544193  | TC0400000742.mm.1 | 0.0  | 0.539024 |
| TC1200000519.mm.1 | NCBI_Gene:629930:p | Ighv8-6  | immunoglobulin heavy variable V8-6              | 115165777 | 115166077 | TC1200002483.mm.1 | -0.2 | 0.539406 |
| TC1200000520.mm.1 | NR_030552          | Mir297a  | microRNA 297a-4                                 | 10472254  | 10511775  | TC0200000101.mm.1 | 0.1  | 0.539525 |
| TC1200000521.mm.1 | NM_010012          | Cyp8b1   | telomerase P450, family 8, subfamily b, polypep | 121914356 | 121916305 | TC0900003276.mm.1 | -0.1 | 0.53974  |
| TC1200000527.mm.1 | NM_020584          | Terf2ip  | telomeric repeat binding factor 2, interacting  | 112011359 | 112020528 | TC0800001343.mm.1 | 0.0  | 0.539801 |
| TC1200000562.mm.1 | ENSMUST00000083686 | Gm24764  | predicted gene, 24764                           | 37822586  | 37822784  | TC0900002058.mm.1 | 0.1  | 0.539849 |
| TC1200000563.mm.1 | NM_008295          | Hsd3b5   | hydroxy-delta-5-steroid dehydrogenase, 3 beta-  | 98618634  | 98645534  | TC0300002554.mm.1 | 0.1  | 0.539888 |
| TC1200000569.mm.1 | ENSMUST00000182374 | Gm7719   | predicted gene 7719                             | 59291964  | 59292938  | TC1200000505.mm.1 | 0.0  | 0.540141 |
| TC1200000576.mm.1 | ENSMUST00000178472 | Gm13018  | predicted gene 13018                            | 142557390 | 142557836 | TC0400003907.mm.1 | 0.2  | 0.54017  |
| TC1200000580.mm.1 | NR_029771          | Mir342   | microRNA 342                                    | 108658620 | 108658718 | TC1200001112.mm.1 | -0.1 | 0.540203 |
| TC1200000586.mm.1 | NR_029771          | Mir342   | microRNA 342                                    | 0         | 0         | TSUnmapped0000012 | -0.1 | 0.540203 |
| TC1200000596.mm.1 | NM_134239          | Vmn1r21  | vomeronasal 1 receptor 217                      | 23113834  | 23114730  | TC1300001615.mm.1 | 0.0  | 0.540343 |
| TC1200000605.mm.1 | ENSMUST00000116874 | Gm23879  | predicted gene, 23879                           | 69955004  | 69955129  | TC0100002538.mm.1 | -0.1 | 0.540459 |
| TC1200000606.mm.1 | NM_011785          | Akt3     | thymoma viral proto-oncogene 3                  | 177020073 | 177258203 | TC0100003627.mm.1 | -0.1 | 0.540464 |
| TC1200000608.mm.1 | NM_001081432       | Ptpqr    | protein tyrosine phosphatase, receptor type, Q  | 107517360 | 107720027 | TC1000002822.mm.1 | 0.0  | 0.540615 |
| TC1200000626.mm.1 | NM_029790          | Mettl15  | methyltransferase like 15                       | 109092297 | 109280748 | TC0200004297.mm.1 | 0.0  | 0.540629 |
| TC1200000647.mm.1 | ENSMUST00000104654 | Gm22232  | predicted gene, 22232                           | 134809275 | 134809368 | TC0100001238.mm.1 | 0.1  | 0.540696 |
| TC1200000652.mm.1 | ENSMUST00000158562 | Gm22949  | predicted gene, 22949                           | 49573214  | 49573318  | TC1400001963.mm.1 | 0.1  | 0.541091 |
| TC1200000653.mm.1 | ENSMUST00000178954 | Gm23189  | predicted gene, 23189                           | 67973676  | 67973777  | TC0100000579.mm.1 | 0.2  | 0.541365 |
| TC1200000654.mm.1 | ENSMUST00000177687 | Gm25708  | predicted gene, 25708                           | 144979484 | 144979585 | TC0100003212.mm.1 | 0.2  | 0.541365 |
| TC1200000655.mm.1 | ENSMUST00000175112 | Gm25959  | predicted gene, 25959                           | 47541984  | 47542085  | TC0200000773.mm.1 | 0.2  | 0.541365 |
| TC1200000675.mm.1 | ENSMUST00000175102 | Gm24332  | predicted gene, 24332                           | 84928074  | 84928175  | TC0200001225.mm.1 | 0.2  | 0.541365 |
| TC1200000682.mm.1 | ENSMUST00000175565 | Gm23802  | predicted gene, 23802                           | 152772788 | 152772889 | TC0200004914.mm.1 | 0.2  | 0.541365 |
| TC1200000693.mm.1 | ENSMUST00000175193 | Gm22903  | predicted gene, 22903                           | 122232535 | 122232636 | TC0300002857.mm.1 | 0.2  | 0.541365 |
| TC1200000697.mm.1 | ENSMUST00000178322 | Gm25571  | predicted gene, 25571                           | 139588876 | 139588977 | TC0400003851.mm.1 | 0.2  | 0.541365 |
| TC1200000700.mm.1 | ENSMUST00000178068 | Gm23049  | predicted gene, 23049                           | 29988388  | 29988489  | TC0600000256.mm.1 | 0.2  | 0.541365 |
| TC1200000715.mm.1 | ENSMUST00000178007 | Gm24370  | predicted gene, 24370                           | 73392142  | 73392243  | TC0600000867.mm.1 | 0.2  | 0.541365 |
| TC1200000718.mm.1 | ENSMUST00000175264 | Gm24159  | predicted gene, 24159                           | 93933835  | 93933936  | TC0800002721.mm.1 | 0.2  | 0.541365 |
| TC1200000731.mm.1 | ENSMUST00000175283 | Gm25299  | predicted gene, 25299                           | 23982185  | 23982286  | TC0X00000241.mm.1 | 0.2  | 0.541365 |
| TC1200000749.mm.1 | ENSMUST00000175560 | Gm23798  | predicted gene, 23798                           | 157191659 | 157191760 | TC0X00001593.mm.1 | 0.2  | 0.541365 |
| TC1200000755.mm.1 | ENSMUST00000175237 | Gm25070  | predicted gene, 25070                           | 95879716  | 95879817  | TC1500002130.mm.1 | 0.2  | 0.541365 |
| TC1200000757.mm.1 | ENSMUST00000175169 | Gm22475  | predicted gene, 22475                           | 5421464   | 5421565   | TC1700000035.mm.1 | 0.2  | 0.541365 |
| TC1200000768.mm.1 | ENSMUST00000174994 | Gm23400  | predicted gene, 23400                           | 82235877  | 82235978  | TC1700001232.mm.1 | 0.2  | 0.541365 |
| TC1200000774.mm.1 | ENSMUST00000157997 | Gm23316  | predicted gene, 23316                           | 20477865  | 20477978  | TC0900000170.mm.1 | -0.1 | 0.541392 |
| TC1200000792.mm.1 | NM_145825          | Cetn4    | centrin 4                                       | 37307749  | 37312708  | TC0300001869.mm.1 | 0.0  | 0.541616 |
| TC1200000796.mm.1 | XM_001472737       | Gm16500  | predicted gene 16500                            | 135963459 | 135972795 | TC0300002997.mm.1 | 0.0  | 0.541741 |
| TC1200000797.mm.1 | NM_138656          | Mvd      | mevalonate (diphospho) decarboxylase            | 122433596 | 122443422 | TC0800003069.mm.1 | 0.0  | 0.542014 |
| TC1200000798.mm.1 | ENSMUST00000119527 | Iffo1    | intermediate filament family orphan 1           | 125145241 | 125161782 | TC0600001449.mm.1 | 0.0  | 0.542115 |
| TC1200000799.mm.1 | ENSMUST00000175104 | Gm24328  | predicted gene, 24328                           | 25055109  | 25055175  | TC0200003127.mm.1 | -0.1 | 0.54235  |
| TC1200000800.mm.1 | NM_146063          | Krt79    | keratin 79                                      | 101929332 | 101940324 | TC1500002279.mm.1 | 0.0  | 0.542373 |
| TC1200000811.mm.1 | ENSMUST00000082910 | Gm26202  | predicted gene, 26202                           | 75001880  | 75001944  | TC1800000800.mm.1 | -0.1 | 0.542447 |
| TC1200000813.mm.1 | NM_212457          | Bex4     | brain expressed gene 4                          | 136138996 | 136140443 | TC0X00001319.mm.1 | 0.0  | 0.542575 |
| TC1200000819.mm.1 | NM_029797          | Mnd1     | meiotic nuclear divisions 1 homolog (S. cerevis | 84087933  | 84155786  | TC0300002241.mm.1 | 0.0  | 0.542632 |
| TC1200000828.mm.1 | ENSMUST00000083455 | Gm23100  | predicted gene, 23100                           | 110003578 | 110003718 | TC0700001619.mm.1 | 0.1  | 0.542669 |
| TC1200000833.mm.1 | ENSMUST00000103816 | Gm23876  | predicted gene, 23876                           | 130531678 | 130531744 | TC0200004628.mm.1 | -0.1 | 0.54278  |
| TC1200000837.mm.1 | NM_001085477       | Olfrr765 | olfactory receptor 765                          | 129046132 | 129047061 | TC1000003171.mm.1 | -0.1 | 0.542935 |
| TC1200000838.mm.1 | ENSMUST00000083835 | Gm23846  | predicted gene, 23846                           | 140440541 | 140440647 | TC0200004732.mm.1 | -0.1 | 0.543173 |
| TC1200000846.mm.1 | ENSMUST00000157966 | Gm23964  | predicted gene, 23964                           | 94764825  | 94764931  | TC1700001342.mm.1 | 0.0  | 0.543185 |
| TC1200000853.mm.1 | NM_001159497       | Ppm1b    | protein phosphatase 1B, magnesium dependent,    | 84956741  | 85023992  | TC1700001266.mm.1 | 0.0  | 0.54343  |
| TC1200000854.mm.1 | NM_009449          | Tuba3b   | tubulin, alpha 3B                               | 145615757 | 145621479 | TC0600001721.mm.1 | 0.0  | 0.543511 |
| TC1200000857.mm.1 | NM_020493          | Srf      | serum response factor                           | 46546839  | 46556175  | TC1700002179.mm.1 | -0.1 | 0.543608 |
| TC1200000867.mm.1 | NM_023878          | Cltn10   | claudin 10                                      | 118787871 | 118875489 | TC1400001288.mm.1 | 0.1  | 0.543696 |
| TC1200000868.mm.1 | NM_146101          | Habp2    | hyaluronin acid binding protein 2               | 56287137  | 56320822  | TC1900000795.mm.1 | 0.1  | 0.54371  |
| TC1200000878.mm.1 | NM_018866          | Cxcl13   | chemokine (C-X-C motif) ligand 13               | 95956928  | 95961068  | TC0500000922.mm.1 | -0.4 | 0.543751 |
| TC1200000888.mm.1 | ENSMUST00000121310 | Gm8682   | predicted gene 8682                             | 160036321 | 160036818 | TC0X00001630.mm.1 | -0.1 | 0.543899 |
| TC1200000891.mm.1 | ENSMUST00000158374 | Gm22763  | predicted gene, 22763                           | 123954883 | 123954989 | TC0600001413.mm.1 | 0.1  | 0.543904 |
| TC1200000894.mm.1 | ENSMUST00000083799 | Gm24491  | predicted gene, 24491                           | 106649913 | 106650019 | TC0X00002838.mm.1 | -0.1 | 0.543943 |
| TC1200000908.mm.1 | NM_023734          | Pi16     | peptidase inhibitor 16                          | 29318877  | 29329413  | TC1700000502.mm.1 | 0.0  | 0.544121 |
| TC1200000936.mm.1 | XM_001473318       | 1700066  | RIKEN cDNA 1700066C05 gene                      | 79999382  | 80000544  | TC1600000911.mm.1 | 0.1  | 0.544144 |
| TC1200000937.mm.1 | ENSMUST00000121275 | Gm14603  | predicted gene 14603                            | 44313270  | 44313717  | TC0X00002131.mm.1 | -0.1 | 0.544254 |
| TC1200000942.mm.1 | NM_001205035       | Gm10142  | predicted gene 10142                            | 77715807  | 77716169  | TC1000000765.mm.1 | -0.1 | 0.544383 |

|                   |                    |         |                                                 |           |           |                   |      |          |
|-------------------|--------------------|---------|-------------------------------------------------|-----------|-----------|-------------------|------|----------|
| TC1200000943.mm.1 | ENSMUST00000158937 | Gm24666 | predicted gene, 24666                           | 9169063   | 9169229   | TC0500000058.mm.1 | 0.1  | 0.54461  |
| TC1200000947.mm.1 | ENSMUST00000120179 | Gm14883 | predicted gene 14883                            | 18343798  | 18343954  | TC0X00000193.mm.1 | 0.0  | 0.544768 |
| TC1200000950.mm.1 | ENSMUST00000086013 | Atp5g2  | ATP synthase, H+ transporting, mitochondrial F0 | 23946649  | 23947237  | TC0700002588.mm.1 | -0.1 | 0.54479  |
| TC1200000959.mm.1 | ENSMUST00000175065 | Gm26463 | predicted gene, 26463                           | 151702368 | 151702468 | TC0500003707.mm.1 | 0.2  | 0.545138 |
| TC1200000970.mm.1 | ENSMUST00000178492 | Gm24975 | predicted gene, 24975                           | 47773329  | 47773429  | TC0600000534.mm.1 | 0.2  | 0.545138 |
| TC1200000978.mm.1 | ENSMUST00000179750 | Gm25100 | predicted gene, 25100                           | 3589164   | 3589264   | TC0700000013.mm.1 | 0.2  | 0.545138 |
| TC1200000979.mm.1 | ENSMUST00000178138 | Gm26282 | predicted gene, 26282                           | 72541480  | 72541580  | TC0800002468.mm.1 | 0.2  | 0.545138 |
| TC1200000989.mm.1 | ENSMUST00000178705 | CAA012  | N/A                                             | 31243     | 31343     | TCUn_GL4563850000 | 0.2  | 0.545138 |
| TC1200000990.mm.1 | NM_144902          | Slc35a3 | solute carrier family 35 (UDP-N-acetylglucosami | 116669469 | 116712831 | TC0300003250.mm.1 | 0.0  | 0.545356 |
| TC1200001002.mm.1 | ENSMUST00000061311 | Mrps36- | mitochondrial ribosomal protein S36, pseudogen  | 53866417  | 53867041  | TC1700002288.mm.1 | -0.1 | 0.54568  |
| TC1200001004.mm.1 | ENSMUST00000173375 | Tyw1    | tRNA-yW synthesizing protein 1 homolog (S. ceri | 130255619 | 130341567 | TC0500001530.mm.1 | 0.1  | 0.545743 |
| TC1200001009.mm.1 | NR_039568          | Mir5108 | microRNA 5108                                   | 61774737  | 61774821  | TC1000000575.mm.1 | 0.1  | 0.545767 |
| TC1200001017.mm.1 | NM_001172146       | Aimp2   | aminoacyl tRNA synthetase complex-interacting   | 143902704 | 143909847 | TC0500003566.mm.1 | -0.1 | 0.545808 |
| TC1200001018.mm.1 | ENSMUST00000104465 | Gm23321 | predicted gene, 23321                           | 119306123 | 119306248 | TC0700004181.mm.1 | 0.1  | 0.546146 |
| TC1200001020.mm.1 | ENSMUST00000120212 | Gm15042 | predicted gene 15042                            | 137108605 | 137109487 | TC0X00001348.mm.1 | -0.1 | 0.546255 |
| TC1200001021.mm.1 | ENSMUST00000117359 | Gm15045 | predicted gene 15045                            | 137109973 | 137110855 | TC0X00001349.mm.1 | -0.1 | 0.546255 |
| TC1200001025.mm.1 | NM_008127          | Gjb4    | gap junction protein, beta 4                    | 127351086 | 127354081 | TC0400003567.mm.1 | 0.1  | 0.546288 |
| TC1200001039.mm.1 | XM_003084943       | LOC1005 | leucine-rich repeat-containing protein 70-like  | 106794439 | 106936915 | TC1300002617.mm.1 | -0.1 | 0.546396 |
| TC1200001041.mm.1 | ENSMUST00000158315 | Gm24930 | predicted gene, 24930                           | 38473120  | 38473202  | TC1900001470.mm.1 | 0.1  | 0.546623 |
| TC1200001043.mm.1 | ENSMUST00000120021 | Olfr129 | olfactory receptor 1293, pseudogene             | 111527304 | 111528242 | TC0200001651.mm.1 | 0.1  | 0.546758 |
| TC1200001044.mm.1 | ENSMUST00000082476 | Gm22247 | predicted gene, 22247                           | 46495155  | 46495285  | TC0400000508.mm.1 | -0.1 | 0.547019 |
| TC1200001047.mm.1 | ENSMUST00000083102 | Gm22362 | predicted gene, 22362                           | 131380273 | 131380406 | TC0600003269.mm.1 | 0.2  | 0.547147 |
| TC1200001051.mm.1 | ENSMUST00000157459 | Gm25342 | predicted gene, 25342                           | 106055958 | 106056079 | TC1000002809.mm.1 | 0.1  | 0.547309 |
| TC1200001068.mm.1 | NM_027027          | Asb9    | ankyrin repeat and SOCS box-containing 9        | 164497903 | 164539752 | TC0X00001671.mm.1 | 0.0  | 0.547451 |
| TC1200001077.mm.1 | NM_025582          | Fam213b | family with sequence similarity 213, member B   | 154895504 | 154899135 | TC0400004127.mm.1 | 0.1  | 0.547471 |
| TC1200001112.mm.1 | XM_003689096       | Gm21344 | predicted gene, 21344                           | 82787060  | 82787743  | TC0Y00000506.mm.1 | 0.1  | 0.547536 |
| TC1200001113.mm.1 | ENSMUST00000025669 | Gm16437 | predicted pseudogene 16437                      | 7668287   | 7668793   | TC1900000143.mm.1 | 0.1  | 0.547595 |
| TC1200001118.mm.1 | ENSMUST00000113205 | Gm11114 | predicted gene 11114                            | 85312773  | 85312860  | TC0900001109.mm.1 | 0.2  | 0.547849 |
| TC1200001130.mm.1 | ENSMUST00000157471 | Gm23672 | predicted gene, 23672                           | 144609004 | 144609110 | TC0100003209.mm.1 | 0.1  | 0.547994 |
| TC1200001143.mm.1 | ENSMUST00000083691 | Gm24765 | predicted gene, 24765                           | 9458670   | 9458772   | TC0100000037.mm.1 | 0.1  | 0.548029 |
| TC1200001145.mm.1 | ENSMUST00000177631 | Gm25626 | predicted gene, 25626                           | 41387900  | 41388006  | TC1000000363.mm.1 | -0.1 | 0.548349 |
| TC1200001147.mm.1 | ENSMUST00000158759 | Gm24680 | predicted gene, 24680                           | 94929701  | 94929826  | TC1400001141.mm.1 | 0.1  | 0.548364 |
| TC1200001164.mm.1 | ENSMUST00000178413 | Gm21740 | predicted gene, 21740                           | 54414835  | 54415539  | TC0Y00000381.mm.1 | 0.1  | 0.548376 |
| TC1200001168.mm.1 | ENSMUST00000178346 | Gm21733 | predicted gene, 21733                           | 55483303  | 55484007  | TC0Y00000386.mm.1 | 0.1  | 0.548376 |
| TC1200001174.mm.1 | ENSMUST00000179016 | Gm21851 | predicted gene, 21851                           | 56249470  | 56250174  | TC0Y00000390.mm.1 | 0.1  | 0.548376 |
| TC1200001175.mm.1 | ENSMUST00000178649 | Gm21868 | predicted gene, 21868                           | 57457286  | 57457990  | TC0Y00000394.mm.1 | 0.1  | 0.548376 |
| TC1200001180.mm.1 | XM_003084987       | Gm3095  | predicted gene 3095                             | 3960179   | 4132784   | TC1400002788.mm.1 | 0.0  | 0.548396 |
| TC1200001183.mm.1 | ENSMUST00000184357 | AC14710 | N/A                                             | 59237107  | 59237176  | TC1200001818.mm.1 | -0.1 | 0.548446 |
| TC1200001185.mm.1 | NM_007641          | Ms4a1   | membrane-spanning 4-domains, subfamily A, m     | 11250603  | 11266151  | TC1900001128.mm.1 | -0.4 | 0.548618 |
| TC1200001189.mm.1 | BC057325           | Gsr     | glutathione reductase                           | 33652523  | 33698163  | TC0800000394.mm.1 | -0.1 | 0.548832 |
| TC1200001190.mm.1 | NM_019661          | Ykt6    | YKT6 homolog (S. Cerevisiae)                    | 5955693   | 5967781   | TC1100000085.mm.1 | -0.1 | 0.548852 |
| TC1200001193.mm.1 | ENSMUST00000158934 | Gm23421 | predicted gene, 23421                           | 35049218  | 35049321  | TC1700000661.mm.1 | -0.1 | 0.54891  |
| TC1200001206.mm.1 | NM_153179          | Pkhd1   | polycystic kidney and hepatic disease 1         | 20057779  | 20618064  | TC0100002028.mm.1 | 0.2  | 0.54906  |
| TC1200001212.mm.1 | XM_003085265       | Gm14925 | predicted gene 14925                            | 96188003  | 96194488  | TC0X00000917.mm.1 | 0.0  | 0.549074 |
| TC1200001220.mm.1 | ENSMUST00000177921 | AC13244 | N/A                                             | 151235    | 152734    | TC1_GL456221_rand | 0.2  | 0.549352 |
| TC1200001221.mm.1 | NM_001136054       | Ate1    | arginyltransferase 1                            | 130391493 | 130520369 | TC0700004384.mm.1 | 0.0  | 0.549429 |
| TC1200001231.mm.1 | NM_145983          | Kcna5   | potassium voltage-gated channel, shaker-relatec | 126532551 | 126698192 | TC0600003159.mm.1 | 0.1  | 0.549469 |
| TC1200001234.mm.1 | ENSMUST00000158238 | Gm23067 | predicted gene, 23067                           | 70186785  | 70186846  | TC0500002555.mm.1 | 0.1  | 0.549572 |
| TC1200001235.mm.1 | ENSMUST00000176946 | Vmn1r-p | vomeronal 1 receptor, pseudogene 12             | 57872415  | 57872916  | TC0600002357.mm.1 | 0.0  | 0.549716 |
| TC1200001243.mm.1 | ENSMUST00000157383 | Gm25492 | predicted gene, 25492                           | 135053988 | 135054116 | TC0500003389.mm.1 | 0.3  | 0.549825 |
| TC1200001248.mm.1 | NM_147064          | Olfr449 | olfactory receptor 449                          | 42837852  | 42838888  | TC0600000470.mm.1 | 0.1  | 0.55     |
| TC1200001257.mm.1 | ENSMUST00000158157 | Gm25375 | predicted gene, 25375                           | 30889096  | 30889230  | TC1600000402.mm.1 | 0.1  | 0.5503   |
| TC1200001262.mm.1 | XM_003085155       | Gm20026 | predicted gene, 20026                           | 26232344  | 26232881  | TC1700000409.mm.1 | -0.1 | 0.550465 |
| TC1200001263.mm.1 | NM_010196          | Fga     | fibrinogen alpha chain                          | 83026153  | 83033627  | TC0300000641.mm.1 | -0.1 | 0.550466 |
| TC1200001269.mm.1 | NM_016718          | Ninj2   | ninjurin 2                                      | 120093350 | 120200339 | TC0600001342.mm.1 | 0.0  | 0.550498 |
| TC1200001272.mm.1 | NM_001039123       | Defb18  | defensin beta 18                                | 18236473  | 18237443  | TC0100002021.mm.1 | -0.1 | 0.550529 |
| TC1200001273.mm.1 | NM_053100          | Trim8   | tripartite motif-containing 8                   | 46501648  | 46516455  | TC1900000703.mm.1 | 0.0  | 0.550582 |
| TC1200001275.mm.1 | NM_008818          | Rhox5   | reproductive homeobox 5                         | 37754608  | 37808878  | TC0X00000354.mm.1 | 0.0  | 0.550621 |
| TC1200001281.mm.1 | ENSMUST00000097669 | Gm10553 | predicted gene 10553                            | 85100164  | 85100535  | TC0100000736.mm.1 | -0.1 | 0.550818 |
| TC1200001282.mm.1 | ENSMUST00000170892 | Gm17387 | predicted gene, 17387                           | 141029131 | 141029620 | TC0700002036.mm.1 | -0.1 | 0.550926 |
| TC1200001293.mm.1 | NM_145390          | Tnpo2   | transportin 2 (importin 3, karyopherin beta 2b) | 85036915  | 85057583  | TC0800000977.mm.1 | 0.1  | 0.551022 |
| TC1200001300.mm.1 | XR_035443          | Gm9734  | predicted gene 9734                             | 120185343 | 120186676 | TC1100002021.mm.1 | -0.1 | 0.551123 |
| TC1200001301.mm.1 | ENSMUST00000158411 | Gm22158 | predicted gene, 22158                           | 19307699  | 19307824  | TC1600000258.mm.1 | 0.1  | 0.551203 |
| TC1200001316.mm.1 | NM_145450          | BC02268 | cDNA sequence BC022687                          | 112808975 | 112816252 | TC1200001273.mm.1 | 0.0  | 0.551295 |
| TC1200001353.mm.1 | NM_007757          | Cpox    | coproporphyrinogen oxidase                      | 58670208  | 58680391  | TC1600000763.mm.1 | 0.0  | 0.55148  |
| TC1200001358.mm.1 | NM_145368          | Acnat2  | acyl-coenzyme A amino acid N-acyltransferase 2  | 49379840  | 49408151  | TC0400002633.mm.1 | 0.1  | 0.551501 |
| TC1200001361.mm.1 | NM_001029983       | Man1b1  | mannosidase, alpha, class 1B, member 1          | 25332338  | 25352213  | TC0200000410.mm.1 | 0.1  | 0.551512 |
| TC1200001364.mm.1 | XR_140477          | A430110 | RIKEN cDNA A430110L20 gene                      | 181225986 | 181228498 | TC0100001731.mm.1 | 0.0  | 0.551551 |
| TC1200001369.mm.1 | ENSMUST00000164408 | Gm3591  | predicted gene 3591                             | 6405827   | 6412482   | TC1400002844.mm.1 | 0.1  | 0.551561 |
| TC1200001380.mm.1 | NM_009215          | Sst     | somatostatin                                    | 23889579  | 23890844  | TC0600001398.mm.1 | 0.0  | 0.551587 |
| TC1200001389.mm.1 | NM_025931          | Ift27   | intraflagellar transport 27                     | 78159463  | 78174108  | TC1500001826.mm.1 | 0.0  | 0.551619 |
| TC1200001393.mm.1 | NM_010413          | Hdac6   | histone deacetylase 6                           | 7930120   | 7947889   | TC0X00001787.mm.1 | 0.0  | 0.55194  |
| TC1200001397.mm.1 | NCBI_Gene:384515:p | Igkv4-6 | immunoglobulin kappa variable 4-68              | 69304834  | 69305363  | TC0600003562.mm.1 | -0.3 | 0.552105 |
| TC1200001409.mm.1 | NM_177429          | Odf1    | oral-facial-digital syndrome 1 gene homolog (hu | 166390033 | 166440704 | TC0X00003345.mm.1 | 0.0  | 0.552122 |
| TC1200001410.mm.1 | ENSMUST00000083909 | Gm25186 | predicted gene, 25186                           | 31737633  | 31737740  | TC1300001750.mm.1 | -0.1 | 0.552476 |
| TC1200001415.mm.1 | ENSMUST00000083735 | Gm22581 | predicted gene, 22581                           | 96724265  | 96724400  | TC0300002528.mm.1 | -0.2 | 0.552527 |
| TC1200001416.mm.1 | ENSMUST00000158090 | Gm22727 | predicted gene, 22727                           | 137734318 | 137734433 | TC0100001279.mm.1 | 0.1  | 0.552664 |
| TC1200001434.mm.1 | NM_010169          | F2r     | coagulation factor II (thrombin) receptor       | 95601789  | 95618459  | TC1300002462.mm.1 | -0.1 | 0.552725 |

|                   |                    |          |                                                 |           |           |                    |      |          |
|-------------------|--------------------|----------|-------------------------------------------------|-----------|-----------|--------------------|------|----------|
| TC1200001436.mm.1 | NM_001099774       | Krtap17  | keratin associated protein 17-1                 | 99993232  | 99993994  | TC1100003747.mm.1  | -0.1 | 0.552746 |
| TC1200001438.mm.1 | ENSMUST00000095050 | Gm10307  | predicted gene 10307                            | 31615458  | 31616843  | TC0100000198.mm.1  | 0.1  | 0.552881 |
| TC1200001439.mm.1 | XR_035373          | AA47440  | expressed sequence AA474408                     | 110057987 | 110061373 | TC0700004088.mm.1  | -0.1 | 0.552947 |
| TC1200001440.mm.1 | NR_035421          | Mir1190  | microRNA 1190                                   | 101021673 | 101021793 | TC1200002238.mm.1  | 0.1  | 0.553396 |
| TC1200001443.mm.1 | uc029wdl.1         | Pol      | RecName: Full=Retrovirus-related Pol polyprotei | 6551451   | 6557390   | TC0700000084.mm.1  | 0.2  | 0.553922 |
| TC1200001448.mm.1 | NM_029671          | 1700034  | RIKEN cDNA 1700034O15 gene                      | 41684431  | 41685717  | TC0600000445.mm.1  | 0.1  | 0.553947 |
| TC1200001476.mm.1 | NM_133999          | Fig4     | FIG4 homolog (S. cerevisiae)                    | 41188172  | 41303241  | TC1000002050.mm.1  | -0.1 | 0.554016 |
| TC1200001482.mm.1 | ENSMUST00000184586 | AC13287  | N/A                                             | 82504596  | 82504655  | TC1500000758.mm.1  | 0.0  | 0.554106 |
| TC1200001485.mm.1 | ENSMUST00000184556 | AC13287  | N/A                                             | 82548624  | 82548683  | TC1500001948.mm.1  | 0.0  | 0.554106 |
| TC1200001498.mm.1 | ENSMUST00000183530 | U6       | U6 spliceosomal RNA                             | 32758202  | 32758310  | TC1300000358.mm.1  | 0.0  | 0.554108 |
| TC1200001499.mm.1 | ENSMUST00000100848 | Gm10401  | predicted gene 10401                            | 115097689 | 115098295 | TC0500003086.mm.1  | -0.1 | 0.554255 |
| TC1200001500.mm.1 | NR_028478          | Snora75  | small nucleolar RNA, H/ACA box 75               | 86351169  | 86351301  | TC0100002740.mm.1  | -0.4 | 0.554344 |
| TC1200001500.mm.1 | NM_028662          | Slc35b2  | solute carrier family 35, member B2             | 45563960  | 45567704  | TC1700000865.mm.1  | 0.0  | 0.554393 |
| TC1200001523.mm.1 | NM_011492          | Stk11    | serine/threonine kinase 11                      | 80115803  | 80130682  | TC1000000839.mm.1  | 0.1  | 0.554486 |
| TC1200001525.mm.1 | NM_001079933       | Defa26   | defensin, alpha, 26                             | 21618168  | 21618972  | TC0800000249.mm.1  | -0.1 | 0.554531 |
| TC1200001527.mm.1 | NM_133662          | Ier3     | immediate early response 3                      | 35821684  | 35822923  | TC1700000703.mm.1  | 0.0  | 0.554549 |
| TC1200001534.mm.1 | ENSMUST00000082547 | Gm23737  | predicted gene, 23737                           | 89019221  | 89019379  | TC1500000857.mm.1  | -0.2 | 0.554546 |
| TC1200001535.mm.1 | XM_003688939       | Gm9763   | predicted pseudogene 9763                       | 99897085  | 99898556  | TC1500002228.mm.1  | 0.0  | 0.554884 |
| TC1200001544.mm.1 | ENSMUST00000180393 | C130032  | ---                                             | 114515697 | 114516424 | TC0900001516.mm.1  | 0.0  | 0.554885 |
| TC1200001552.mm.1 | NM_010114          | Klk1b22  | kalikrein 1-related peptidase b22               | 44112673  | 44116922  | TC0700000790.mm.1  | 0.2  | 0.555226 |
| TC1200001568.mm.1 | ENSMUST00000158237 | Gm23066  | predicted gene, 23066                           | 23425651  | 23425721  | TC1600000342.mm.1  | 0.0  | 0.555286 |
| TC1200001569.mm.1 | ENSMUST00000122313 | Gm11594  | predicted gene 11594                            | 97322328  | 97322489  | TC1100003643.mm.1  | -0.1 | 0.555521 |
| TC1200001586.mm.1 | NM_008296          | Hsf1     | heat shock factor 1                             | 76477435  | 76500972  | TC1500000593.mm.1  | -0.1 | 0.555625 |
| TC1200001589.mm.1 | ENSMUST00000157535 | Gm23538  | predicted gene, 23538                           | 100760168 | 100760268 | TC1400002617.mm.1  | 0.1  | 0.555714 |
| TC1200001592.mm.1 | NM_007751          | Cox8b    | cytochrome c oxidase subunit VIIIb              | 140898942 | 140900446 | TC07000004510.mm.1 | -0.1 | 0.555805 |
| TC1200001593.mm.1 | NM_146907          | Olfir128 | olfactory receptor 1282                         | 111335159 | 111336076 | TC0200004321.mm.1  | 0.0  | 0.555852 |
| TC1200001594.mm.1 | NM_016908          | Syt5     | synaptotagmin V                                 | 4539765   | 4546567   | TC0700002162.mm.1  | 0.0  | 0.555883 |
| TC1200001595.mm.1 | NM_026819          | Dhrs1    | dehydrogenase/reductase (SDR family) member     | 55739020  | 55745690  | TC1400002100.mm.1  | 0.1  | 0.556179 |
| TC1200001597.mm.1 | ENSMUST00000103950 | Gm23577  | predicted gene, 23577                           | 4580069   | 4580178   | TC0700002164.mm.1  | 0.0  | 0.556274 |
| TC1200001602.mm.1 | NM_027921          | Slc16a1  | solute carrier family 16 (monocarboxylic acid t | 84905898  | 84935125  | TC0100002702.mm.1  | 0.1  | 0.556295 |
| TC1200001626.mm.1 | ENSMUST00000082455 | Gm26446  | predicted gene, 26446                           | 93363255  | 93363357  | TC0100000932.mm.1  | -0.1 | 0.556354 |
| TC1200001632.mm.1 | ENSMUST00000182021 | Gm4929   | predicted gene 4929                             | 13752674  | 13753665  | TC1200001443.mm.1  | 0.1  | 0.556513 |
| TC1200001637.mm.1 | NM_001013389       | Mrs2     | MRS2 magnesium homeostasis factor homolog (     | 24992295  | 25020379  | TC1300001672.mm.1  | 0.1  | 0.556659 |
| TC1200001643.mm.1 | NM_011254          | Rbp1     | retinol binding protein 1, cellular             | 98422961  | 98446551  | TC0900001232.mm.1  | 0.1  | 0.556845 |
| TC1200001660.mm.1 | ENSMUST00000074819 | Gm8116   | predicted gene 8116                             | 78820423  | 78821892  | TC0900002731.mm.1  | -0.1 | 0.557122 |
| TC1200001674.mm.1 | NM_001040700       | BC05101  | cDNA sequence BC051019                          | 109712181 | 109723850 | TC0700004078.mm.1  | 0.0  | 0.557249 |
| TC1200001685.mm.1 | ENSMUST00000093728 | Gm23516  | predicted gene, 23516                           | 15896663  | 15896769  | TC0X00001887.mm.1  | -0.1 | 0.557421 |
| TC1200001686.mm.1 | ENSMUST00000180206 | CAAA012  | N/A                                             | 32719     | 32818     | TCUn_GL4563850000  | 0.2  | 0.557775 |
| TC1200001697.mm.1 | NM_018872          | Tmem131  | transmembrane protein 131                       | 36792189  | 36939527  | TC0100002193.mm.1  | -0.1 | 0.557783 |
| TC1200001702.mm.1 | ENSMUST00000118611 | Gm12328  | predicted gene 12328                            | 73771924  | 73772120  | TC1100003175.mm.1  | -0.1 | 0.557869 |
| TC1200001704.mm.1 | ENSMUST00000159182 | Gm16557  | predicted gene 16557                            | 122563283 | 122563473 | TC0600003069.mm.1  | -0.1 | 0.557883 |
| TC1200001715.mm.1 | ENSMUST00000075585 | Gm10080  | predicted gene 10080                            | 44374595  | 44375209  | TC0900002161.mm.1  | 0.1  | 0.557921 |
| TC1200001721.mm.1 | XM_003688883       | Gm9631   | predicted gene 9631                             | 121905762 | 121947734 | TC1100004259.mm.1  | 0.0  | 0.557957 |
| TC1200001734.mm.1 | NCBI_Gene:434586:p | Igkv4-7  | immunoglobulin kappa chain variable 4-71        | 69243158  | 69243688  | TC0600003559.mm.1  | -0.5 | 0.55809  |
| TC1200001736.mm.1 | NM_177713          | Gap2     | Grb2-binding adaptor, transmembrane             | 110352615 | 110357172 | TC1300002654.mm.1  | 0.1  | 0.558093 |
| TC1200001742.mm.1 | ENSMUST00000119611 | Gm6444   | predicted gene 6444                             | 123066242 | 123066699 | TC0700001407.mm.1  | -0.1 | 0.558196 |
| TC1200001745.mm.1 | NM_181849          | Fgb      | fibrinogen beta chain                           | 83042247  | 83049803  | TC0300002230.mm.1  | -0.1 | 0.558362 |
| TC1200001748.mm.1 | NM_016781          | Prkag1   | protein kinase, AMP-activated, gamma 1 non-ca   | 98812797  | 98831508  | TC1500002191.mm.1  | -0.1 | 0.558509 |
| TC1200001750.mm.1 | ENSMUST00000118914 | Gm15039  | predicted gene 15039                            | 137107246 | 137108120 | TC0X00001347.mm.1  | -0.1 | 0.558578 |
| TC1200001751.mm.1 | ENSMUST00000093707 | n-R5s13  | nuclear encoded rRNA 5S 13                      | 151777671 | 151777789 | TC0X00001524.mm.1  | -0.2 | 0.558582 |
| TC1200001753.mm.1 | ENSMUST00000158825 | Gm24225  | predicted gene, 24225                           | 66981088  | 66981185  | TC0900002538.mm.1  | 0.1  | 0.558685 |
| TC1200001754.mm.1 | ENSMUST00000115822 | Gm11172  | predicted gene 11172                            | 10812915  | 10812994  | TC1600000122.mm.1  | -0.1 | 0.558809 |
| TC1200001755.mm.1 | ENSMUST00000083378 | Gm26063  | predicted gene, 26063                           | 46151698  | 46151804  | TC1500001474.mm.1  | 0.1  | 0.558942 |
| TC1200001761.mm.1 | ENSMUST00000104603 | Gm25563  | predicted gene, 25563                           | 76420417  | 76420490  | TC1200001950.mm.1  | -0.3 | 0.558979 |
| TC1200001762.mm.1 | NM_001195390       | Commd7   | COMM domain containing 7                        | 153616930 | 153632781 | TC0200004932.mm.1  | 0.0  | 0.559096 |
| TC1200001763.mm.1 | NM_025304          | Lcmt1    | leucine carboxyl methyltransferase 1            | 123377982 | 123430358 | TC0700001773.mm.1  | -0.1 | 0.559187 |
| TC1200001765.mm.1 | NM_026807          | Krtap4-  | keratin associated protein 4-2                  | 99634111  | 99635084  | TC1100003724.mm.1  | 0.1  | 0.559253 |
| TC1200001768.mm.1 | NCBI_Gene:435328:p | Ighv1-6  | immunoglobulin heavy variable V1-67             | 115603940 | 115604233 | TC1200002645.mm.1  | -0.3 | 0.559381 |
| TC1200001775.mm.1 | ENSMUST00000092511 | Timm23   | translocase of inner mitochondrial membrane 2:  | 59395632  | 59396757  | TC1000000533.mm.1  | 0.1  | 0.559592 |
| TC1200001781.mm.1 | NM_178641          | Inpp5f   | inositol polyphosphate-5-phosphatase F          | 128611328 | 128696436 | TC0700001888.mm.1  | 0.0  | 0.5596   |
| TC1200001785.mm.1 | NM_007906          | Eef1a2   | eukaryotic translation elongation factor 1 alph | 181147653 | 181157015 | TC0200005433.mm.1  | 0.0  | 0.559691 |
| TC1200001791.mm.1 | ENSMUST00000085228 | Ube2nl   | ubiquitin-conjugating enzyme E2N-like           | 61549243  | 61549701  | TC0700003365.mm.1  | -0.1 | 0.559774 |
| TC1200001803.mm.1 | ENSMUST00000092138 | Gm21769  | predicted gene, 21769                           | 20122307  | 20151685  | TC0800003221.mm.1  | 0.2  | 0.55983  |
| TC1200001806.mm.1 | ENSMUST00000158008 | Gm22313  | predicted gene, 22313                           | 97237818  | 97237946  | TC0200001489.mm.1  | 0.1  | 0.559842 |
| TC1200001810.mm.1 | ENSMUST00000082914 | Gm23932  | predicted gene, 23932                           | 69386066  | 69386172  | TC0500002548.mm.1  | -0.1 | 0.559913 |
| TC1200001815.mm.1 | NM_015737          | Galnt4   | UDP-N-acetyl-alpha-D-galactosamine:polypeptid   | 99108135  | 99113247  | TC1000001204.mm.1  | 0.1  | 0.559934 |
| TC1200001816.mm.1 | NR_003953          | 1700022  | glycerol-3-phosphate dehydrogenase 1-like pseu  | 24645453  | 24648860  | TC0500000220.mm.1  | 0.0  | 0.559983 |
| TC1200001818.mm.1 | NM_023480          | Fahd1    | fumarylacetoacetate hydrolase domain containi   | 24848896  | 24850302  | TC1700001644.mm.1  | 0.1  | 0.560112 |
| TC1200001820.mm.1 | NM_001005858       | I830012  | RIKEN cDNA I830012O16 gene                      | 34607933  | 34613401  | TC1900000502.mm.1  | 0.1  | 0.56012  |
| TC1200001825.mm.1 | NM_145963          | Kcnj14   | potassium inwardly-rectifying channel, subfamil | 45816460  | 45824756  | TC0700003023.mm.1  | 0.0  | 0.560167 |
| TC1200001832.mm.1 | ENSMUST00000177933 | Gm22255  | predicted gene, 22255                           | 59510934  | 59511012  | TC0700003212.mm.1  | -0.1 | 0.560181 |
| TC1200001836.mm.1 | NR_002890          | Gm12070  | glyceraldehyde-3-phosphate dehydrogenase pse    | 26785108  | 26787859  | TC1100000268.mm.1  | 0.1  | 0.560295 |
| TC1200001837.mm.1 | XM_621554          | Olfir117 | olfactory receptor 1174, pseudogene             | 88310832  | 88314908  | TC0200004015.mm.1  | 0.1  | 0.560342 |
| TC1200001841.mm.1 | NM_198619          | Zfp933   | zinc finger protein 933                         | 147822986 | 147848375 | TC0400004000.mm.1  | 0.0  | 0.560426 |
| TC1200001844.mm.1 | NM_021525          | Rcl1     | RNA terminal phosphate cyclase-like 1           | 29101375  | 29143846  | TC1900000432.mm.1  | 0.0  | 0.560525 |
| TC1200001855.mm.1 | ENSMUST00000121386 | Gm13805  | predicted gene 13805                            | 98182565  | 98182668  | TC0200004195.mm.1  | 0.2  | 0.560695 |
| TC1200001858.mm.1 | ENSMUST00000081204 | Gm10110  | predicted gene 10110                            | 89896223  | 89898466  | TC1400002524.mm.1  | 0.1  | 0.560948 |
| TC1200001861.mm.1 | XM_003689030       | Gm21427  | predicted gene, 21427                           | 25482524  | 25483515  | TC0Y00000074.mm.1  | 0.1  | 0.561138 |

|                   |                    |         |                                                 |           |           |                    |      |          |
|-------------------|--------------------|---------|-------------------------------------------------|-----------|-----------|--------------------|------|----------|
| TC1200001863.mm.1 | ENSMUST00000182069 | Gm18848 | predicted gene, 18848                           | 101205723 | 101206514 | TC1200001002.mm.1  | -0.1 | 0.561199 |
| TC1200001867.mm.1 | ENSMUST00000175024 | Gm23363 | predicted gene, 23363                           | 32318249  | 32318356  | TC0200000575.mm.1  | 0.0  | 0.561505 |
| TC1200001868.mm.1 | ENSMUST00000121279 | Gm8839  | predicted gene 8839                             | 86270712  | 86272356  | TC0X00000845.mm.1  | -0.1 | 0.561772 |
| TC1200001870.mm.1 | ENSMUST00000120125 | Gm5255  | predicted gene 5255                             | 65550464  | 65551237  | TC0100002483.mm.1  | -0.1 | 0.561899 |
| TC1200001875.mm.1 | ENSMUST00000122776 | Gm24141 | predicted gene, 24141                           | 74362610  | 74362724  | TC0900000999.mm.1  | -0.1 | 0.561925 |
| TC1200001876.mm.1 | ENSMUST00000175538 | Gm26238 | predicted gene, 26238                           | 3652544   | 3652660   | TC0500000016.mm.1  | 0.1  | 0.562075 |
| TC1200001879.mm.1 | XM_001003833       | Gm13931 | predicted gene 13931                            | 111844262 | 111851838 | TC0200004332.mm.1  | 0.1  | 0.562186 |
| TC1200001881.mm.1 | XM_001476500       | Gm3269  | predicted gene 3269                             | 4838106   | 4846867   | TC1400000033.mm.1  | 0.0  | 0.562193 |
| TC1200001893.mm.1 | ENSMUST00000162856 | Gm16232 | predicted gene 16232                            | 152876051 | 152876217 | TC0300003151.mm.1  | -0.1 | 0.562425 |
| TC1200001897.mm.1 | NM_022019          | Dusp10  | dual specificity phosphatase 10                 | 184013302 | 184075636 | TC0100001765.mm.1  | -0.1 | 0.56244  |
| TC1200001898.mm.1 | XR_106194          | Gm14964 | predicted gene 14964                            | 6530694   | 6532808   | TC1900001011.mm.1  | 0.0  | 0.562456 |
| TC1200001899.mm.1 | NM_146328          | Olfr110 | olfactory receptor 110                          | 37492468  | 37499674  | TC1700000775.mm.1  | 0.1  | 0.562495 |
| TC1200001901.mm.1 | NM_013641          | Ptger1  | prostaglandin E receptor 1 (subtype EP1)        | 83666640  | 83672753  | TC0800000931.mm.1  | 0.0  | 0.562742 |
| TC1200001913.mm.1 | NM_008466          | Kpna3   | karyopherin (importin) alpha 3                  | 61365186  | 61439947  | TC1400002189.mm.1  | -0.1 | 0.562843 |
| TC1200001914.mm.1 | NM_008261          | Hnf4a   | hepatic nuclear factor 4, alpha                 | 163506808 | 163572910 | TC0200002489.mm.1  | 0.1  | 0.563127 |
| TC1200001916.mm.1 | NM_153108          | Defb8   | defensin beta 8                                 | 19445769  | 19447606  | TC0800001808.mm.1  | 0.0  | 0.563189 |
| TC1200001921.mm.1 | XM_003688927       | Gm21560 | predicted gene, 21560                           | 6210617   | 6219292   | TC1400002842.mm.1  | 0.0  | 0.563233 |
| TC1200001926.mm.1 | NM_024179          | 610009  | RIKEN cDNA 0610009O20 gene                      | 38250249  | 38262629  | TC1800000394.mm.1  | 0.0  | 0.563371 |
| TC1200001938.mm.1 | NM_134139          | Wdr74   | WD repeat domain 74                             | 8735839   | 8740624   | TC1900000152.mm.1  | -0.2 | 0.563375 |
| TC1200001939.mm.1 | NM_001160039       | Ndufs1  | NADH dehydrogenase (ubiquinone) Fe-S protein    | 63143590  | 63176822  | TC0100002445.mm.1  | 0.1  | 0.563566 |
| TC1200001943.mm.1 | ENSMUST00000103771 | Mir669l | microRNA 669l                                   | 10468971  | 10469068  | TC0200000098.mm.1  | 0.1  | 0.56364  |
| TC1200001947.mm.1 | NM_001142750       | Tgif2lx | TGFB-induced factor homeobox 2-like, X-linked 2 | 118427227 | 118428258 | TC0X00001168.mm.1  | 0.1  | 0.563799 |
| TC1200001950.mm.1 | NM_027335          | 2210016 | RIKEN cDNA 2210016F16 gene                      | 58380046  | 58385225  | TC1300002098.mm.1  | 0.1  | 0.563835 |
| TC1200001951.mm.1 | NM_152803          | Hpse    | heparanase                                      | 100679484 | 100719716 | TC0500002843.mm.1  | 0.1  | 0.564188 |
| TC1200001959.mm.1 | ENSMUST00000104260 | Gm23126 | predicted gene, 23126                           | 42866685  | 42866818  | TC0100002259.mm.1  | 0.1  | 0.564484 |
| TC1200001963.mm.1 | ENSMUST00000178338 | Gm24866 | predicted gene, 24866                           | 59393561  | 59393639  | TC0700003157.mm.1  | -0.1 | 0.564778 |
| TC1200001971.mm.1 | ENSMUST00000179405 | Gm25463 | predicted gene, 25463                           | 59412802  | 59412880  | TC0700003162.mm.1  | -0.1 | 0.564778 |
| TC1200001972.mm.1 | ENSMUST00000179164 | Gm24528 | predicted gene, 24528                           | 59415590  | 59415668  | TC0700003165.mm.1  | -0.1 | 0.564778 |
| TC1200001979.mm.1 | ENSMUST00000177610 | Gm23356 | predicted gene, 23356                           | 59417457  | 59417535  | TC0700003166.mm.1  | -0.1 | 0.564778 |
| TC1200001981.mm.1 | ENSMUST00000178434 | Gm24872 | predicted gene, 24872                           | 59421187  | 59421265  | TC0700003168.mm.1  | -0.1 | 0.564778 |
| TC1200001997.mm.1 | ENSMUST00000177611 | Gm24027 | predicted gene, 24027                           | 59460677  | 59460755  | TC0700003188.mm.1  | -0.1 | 0.564778 |
| TC1200002001.mm.1 | ENSMUST00000178357 | Gm22524 | predicted gene, 22524                           | 59462548  | 59462626  | TC0700003189.mm.1  | -0.1 | 0.564778 |
| TC1200002002.mm.1 | ENSMUST00000177781 | Gm22630 | predicted gene, 22630                           | 59464420  | 59464498  | TC0700003190.mm.1  | -0.1 | 0.564778 |
| TC1200002016.mm.1 | ENSMUST00000179825 | Gm25741 | predicted gene, 25741                           | 59466292  | 59466370  | TC0700003192.mm.1  | -0.1 | 0.564778 |
| TC1200002017.mm.1 | ENSMUST00000177865 | Gm26059 | predicted gene, 26059                           | 59468163  | 59468241  | TC0700003193.mm.1  | -0.1 | 0.564778 |
| TC1200002020.mm.1 | ENSMUST00000177628 | Gm22511 | predicted gene, 22511                           | 59471904  | 59471982  | TC0700003195.mm.1  | -0.1 | 0.564778 |
| TC1200002034.mm.1 | ENSMUST00000177580 | Gm25098 | predicted gene, 25098                           | 59492432  | 59492510  | TC0700003206.mm.1  | -0.1 | 0.564778 |
| TC1200002036.mm.1 | ENSMUST00000178965 | Gm24702 | predicted gene, 24702                           | 59494300  | 59494378  | TC0700003207.mm.1  | -0.1 | 0.564778 |
| TC1200002049.mm.1 | ENSMUST00000177833 | Gm25462 | predicted gene, 25462                           | 59498041  | 59498119  | TC0700003209.mm.1  | -0.1 | 0.564778 |
| TC1200002059.mm.1 | ENSMUST00000178044 | Gm25523 | predicted gene, 25523                           | 59509068  | 59509146  | TC0700003211.mm.1  | -0.1 | 0.564778 |
| TC1200002069.mm.1 | ENSMUST00000179190 | Gm22909 | predicted gene, 22909                           | 59520284  | 59520362  | TC0700003217.mm.1  | -0.1 | 0.564778 |
| TC1200002074.mm.1 | ENSMUST00000179661 | Gm26392 | predicted gene, 26392                           | 59527771  | 59527849  | TC0700003221.mm.1  | -0.1 | 0.564778 |
| TC1200002078.mm.1 | ENSMUST00000179861 | Gm24219 | predicted gene, 24219                           | 59529643  | 59529721  | TC0700003222.mm.1  | -0.1 | 0.564778 |
| TC1200002082.mm.1 | ENSMUST00000179740 | Gm25230 | predicted gene, 25230                           | 59531515  | 59531593  | TC0700003223.mm.1  | -0.1 | 0.564778 |
| TC1200002092.mm.1 | ENSMUST00000178127 | Gm22627 | predicted gene, 22627                           | 59533386  | 59533464  | TC0700003224.mm.1  | -0.1 | 0.564778 |
| TC1200002094.mm.1 | ENSMUST00000178104 | Gm24585 | predicted gene, 24585                           | 59535256  | 59535334  | TC0700003225.mm.1  | -0.1 | 0.564778 |
| TC1200002099.mm.1 | ENSMUST00000179011 | Gm24206 | predicted gene, 24206                           | 59538998  | 59539076  | TC0700003227.mm.1  | -0.1 | 0.564778 |
| TC1200002103.mm.1 | ENSMUST00000179576 | Gm25209 | predicted gene, 25209                           | 59542742  | 59542820  | TC0700003229.mm.1  | -0.1 | 0.564778 |
| TC1200002110.mm.1 | ENSMUST00000179403 | Gm26334 | predicted gene, 26334                           | 59548359  | 59548437  | TC0700003232.mm.1  | -0.1 | 0.564778 |
| TC1200002113.mm.1 | ENSMUST00000179530 | Gm25742 | predicted gene, 25742                           | 59550238  | 59550316  | TC0700003233.mm.1  | -0.1 | 0.564778 |
| TC1200002126.mm.1 | ENSMUST00000177976 | Gm25146 | predicted gene, 25146                           | 59595165  | 59595243  | TC0700003257.mm.1  | -0.1 | 0.564778 |
| TC1200002129.mm.1 | ENSMUST00000179827 | Gm24759 | predicted gene, 24759                           | 59597035  | 59597113  | TC0700003258.mm.1  | -0.1 | 0.564778 |
| TC1200002135.mm.1 | ENSMUST00000178406 | Gm23575 | predicted gene, 23575                           | 59604519  | 59604597  | TC0700003262.mm.1  | -0.1 | 0.564778 |
| TC1200002153.mm.1 | ENSMUST00000178924 | Gm22449 | predicted gene, 22449                           | 59608262  | 59608340  | TC0700003264.mm.1  | -0.1 | 0.564778 |
| TC1200002157.mm.1 | ENSMUST00000178242 | Gm22912 | predicted gene, 22912                           | 59612005  | 59612083  | TC0700003266.mm.1  | -0.1 | 0.564778 |
| TC1200002159.mm.1 | ENSMUST00000178367 | Gm25710 | predicted gene, 25710                           | 59613876  | 59613954  | TC0700003267.mm.1  | -0.1 | 0.564778 |
| TC1200002166.mm.1 | ENSMUST00000179778 | Gm26434 | predicted gene, 26434                           | 59615744  | 59615822  | TC0700003268.mm.1  | -0.1 | 0.564778 |
| TC1200002167.mm.1 | ENSMUST00000177782 | Gm23560 | predicted gene, 23560                           | 59617612  | 59617690  | TC0700003269.mm.1  | -0.1 | 0.564778 |
| TC1200002173.mm.1 | NM_027275          | Ptcd3   | pentatricopeptide repeat domain 3               | 71880638  | 71908762  | TC0600002475.mm.1  | 0.1  | 0.564788 |
| TC1200002174.mm.1 | NR_029648          | Mir297- | microRNA 297-2                                  | 104494178 | 104609625 | TC0800002804.mm.1  | 0.2  | 0.564931 |
| TC1200002194.mm.1 | NCBI_Gene:385120:p | Igkv4-7 | immunoglobulin kappa chain variable 4-70        | 69267888  | 69268412  | TC0600003560.mm.1  | -0.4 | 0.565063 |
| TC1200002213.mm.1 | NM_010779          | Mcpt4   | mast cell protease 4                            | 56059743  | 56062310  | TC1400002112.mm.1  | 0.1  | 0.565073 |
| TC1200002216.mm.1 | ENSMUST00000158755 | Gm24677 | predicted gene, 24677                           | 67279082  | 67279231  | TC0800002336.mm.1  | 0.1  | 0.565095 |
| TC1200002224.mm.1 | NM_011206          | Ptpn18  | protein tyrosine phosphatase, non-receptor type | 34459746  | 34475733  | TC0100000224.mm.1  | 0.0  | 0.565202 |
| TC1200002234.mm.1 | NM_001081186       | Tmem52b | transmembrane protein 52B                       | 129512557 | 129519227 | TC0600001534.mm.1  | 0.2  | 0.565318 |
| TC1200002238.mm.1 | ENSMUST00000083924 | Gm22350 | predicted gene, 22350                           | 18445875  | 18446030  | TC1400000143.mm.1  | 0.1  | 0.565379 |
| TC1200002240.mm.1 | NCBI_Gene:667683:p | Igkv4-5 | immunoglobulin kappa variable 4-59              | 69438218  | 69438741  | TC0600003566.mm.1  | -0.5 | 0.565415 |
| TC1200002242.mm.1 | ENSMUST00000102452 | Gm22689 | predicted gene, 22689                           | 7120394   | 7120503   | TC1300001400.mm.1  | 0.0  | 0.565444 |
| TC1200002251.mm.1 | NM_172265          | Eif2b5  | eukaryotic translation initiation factor 2B, su | 20498817  | 20509955  | TC1600000277.mm.1  | -0.1 | 0.565473 |
| TC1200002254.mm.1 | NM_001099637       | Cep170  | centrosomal protein 170                         | 176733653 | 176807124 | TC0100003620.mm.1  | -0.1 | 0.565531 |
| TC1200002263.mm.1 | NM_172486          | Zfp677  | zinc finger protein 677                         | 21383748  | 21399265  | TC1700000269.mm.1  | -0.1 | 0.565651 |
| TC1200002267.mm.1 | NM_001037957       | Dyrk1b  | dual-specificity tyrosine-(Y)-phosphorylation r | 28179469  | 28187298  | TC0700000488.mm.1  | 0.1  | 0.565752 |
| TC1200002270.mm.1 | NM_145424          | BC08959 | cDNA sequence BC089597                          | 127866474 | 127877319 | TC1000001576.mm.1  | 0.2  | 0.566321 |
| TC1200002274.mm.1 | ENSMUST00000117030 | Gm23989 | predicted gene, 23989                           | 89431336  | 89431401  | TC1200000908.mm.1  | 0.1  | 0.566365 |
| TC1200002280.mm.1 | ENSMUST00000179911 | Gm22069 | predicted gene, 22069                           | 45634706  | 45634812  | TC09000002203.mm.1 | 0.1  | 0.566367 |
| TC1200002285.mm.1 | NM_001098799       | Tox2    | TOX high mobility group box family member 2     | 163203125 | 163324170 | TC0200002482.mm.1  | 0.0  | 0.566447 |
| TC1200002289.mm.1 | ENSMUST00000178208 | n-R5s11 | nuclear encoded rRNA 5S 112                     | 123559201 | 123559319 | TC0800003116.mm.1  | -0.3 | 0.56653  |
| TC1200002291.mm.1 | ENSMUST00000180000 | n-R5s12 | nuclear encoded rRNA 5S 120                     | 123572710 | 123572828 | TC0800003124.mm.1  | -0.3 | 0.56653  |

|                   |                    |         |                                                 |           |           |                   |      |          |
|-------------------|--------------------|---------|-------------------------------------------------|-----------|-----------|-------------------|------|----------|
| TC1200002299.mm.1 | ENSMUST00000179377 | n-R5s12 | nuclear encoded rRNA 5S 12S                     | 123581155 | 123581273 | TC0800003129.mm.1 | -0.3 | 0.56653  |
| TC1200002333.mm.1 | NM_010602          | Kcnj11  | potassium inwardly rectifying channel, subfamil | 46097123  | 46100764  | TC0700003030.mm.1 | 0.0  | 0.566555 |
| TC1200002343.mm.1 | ENSMUST00000175491 | mmu-let | mmu-let-7f-1                                    | 48537825  | 48537921  | TC1300000554.mm.1 | 0.0  | 0.566715 |
| TC1200002346.mm.1 | ENSMUST00000083808 | Gm25007 | predicted gene, 25007                           | 48551308  | 48551440  | TC1500000366.mm.1 | 0.1  | 0.566741 |
| TC1200002355.mm.1 | NM_001102409       | Kng2    | kininogen 2                                     | 22985852  | 23029101  | TC1600001387.mm.1 | 0.2  | 0.566818 |
| TC1200002359.mm.1 | ENSMUST00000176047 | Atpaf1  | ATP synthase mitochondrial F1 complex assembl   | 115784812 | 115818828 | TC0400001235.mm.1 | 0.0  | 0.567115 |
| TC1200002366.mm.1 | NM_027968          | Fbxo30  | F-box protein 30                                | 11281330  | 11298052  | TC1000000080.mm.1 | 0.0  | 0.567157 |
| TC1200002367.mm.1 | ENSMUST00000082926 | n-R5s22 | nuclear encoded rRNA 5S 220                     | 154311408 | 154311527 | TC0100003293.mm.1 | 0.1  | 0.567233 |
| TC1200002396.mm.1 | NM_023140          | Glrx3   | glutaredoxin 3                                  | 137437648 | 137468594 | TC0700001980.mm.1 | 0.1  | 0.567258 |
| TC1200002401.mm.1 | NM_133719          | Metrn   | meteorin, glial cell differentiation regulator  | 25794571  | 25797136  | TC1700001674.mm.1 | 0.0  | 0.56736  |
| TC1200002402.mm.1 | ENSMUST00000083305 | Gm22971 | predicted gene, 22971                           | 96469435  | 96469531  | TC0600002793.mm.1 | -0.2 | 0.567475 |
| TC1200002413.mm.1 | NM_023231          | Stoml2  | stomatin (Epb7.2)-like 2                        | 43027690  | 43031710  | TC0400002516.mm.1 | 0.0  | 0.567489 |
| TC1200002416.mm.1 | ENSMUST00000104058 | Gm23273 | predicted gene, 23273                           | 35975330  | 35975464  | TC0600000349.mm.1 | 0.1  | 0.567498 |
| TC1200002421.mm.1 | NM_026796          | Smyd2   | SET and MYND domain containing 2                | 189880492 | 189922363 | TC0100003786.mm.1 | 0.0  | 0.567534 |
| TC1200002432.mm.1 | ENSMUST00000175273 | Gm22464 | predicted gene, 22464                           | 15707782  | 15707845  | TC0X00000178.mm.1 | 0.2  | 0.567616 |
| TC1200002440.mm.1 | NM_027353          | Cd2bp2  | CD2 antigen (cytoplasmic tail) binding protein  | 127191660 | 127196077 | TC0700004315.mm.1 | 0.0  | 0.567681 |
| TC1200002443.mm.1 | NM_008774          | Pabpc1  | poly(A) binding protein, cytoplasmic 1          | 36595658  | 36608973  | TC1500001379.mm.1 | -0.1 | 0.568011 |
| TC1200002445.mm.1 | NM_024462          | Cdc23   | coiled-coil domain containing 23                | 119195306 | 119201298 | TC0400001327.mm.1 | 0.0  | 0.568033 |
| TC1200002454.mm.1 | NM_001024225       | Defa24  | defensin, alpha, 24                             | 21734494  | 21735471  | TC0800000257.mm.1 | 0.0  | 0.568045 |
| TC1200002455.mm.1 | ENSMUST00000105596 | Gm10945 | predicted gene 10945                            | 6740629   | 67611761  | TC1000001689.mm.1 | -0.1 | 0.568186 |
| TC1200002456.mm.1 | NM_144934          | Mbd3l2  | methyl-CpG binding domain protein 3-like 2      | 18430615  | 18446316  | TC0900000135.mm.1 | 0.0  | 0.568219 |
| TC1200002469.mm.1 | XM_001472881       | Gm20804 | predicted gene, 20804                           | 62020395  | 62021078  | TC0Y00000413.mm.1 | 0.1  | 0.568478 |
| TC1200002472.mm.1 | NM_011070          | Pfdn2   | prefoldin 2                                     | 171345670 | 171359254 | TC0100001586.mm.1 | 0.0  | 0.568652 |
| TC1200002474.mm.1 | NM_008600          | Mip     | major intrinsic protein of eye lens fiber       | 128225838 | 128231812 | TC1000001592.mm.1 | 0.0  | 0.56867  |
| TC1200002475.mm.1 | NM_175022          | Prr12   | proline rich 12                                 | 45027707  | 45052881  | TC0700002984.mm.1 | 0.0  | 0.56875  |
| TC1200002476.mm.1 | NM_178802          | Trim65  | tripartite motif-containing 65                  | 116121846 | 116131128 | TC1100004302.mm.1 | 0.0  | 0.568798 |
| TC1200002479.mm.1 | ENSMUST00000178741 | Gm22851 | predicted gene, 22851                           | 59774190  | 59774283  | TC0700003308.mm.1 | 0.0  | 0.568916 |
| TC1200002480.mm.1 | ENSMUST00000082512 | Gm26228 | predicted gene, 26228                           | 33644495  | 33644601  | TC1400000361.mm.1 | 0.1  | 0.568935 |
| TC1200002481.mm.1 | ENSMUST00000104457 | Gm24983 | predicted gene, 24983                           | 59458815  | 59458883  | TC0700003187.mm.1 | 0.1  | 0.568954 |
| TC1200002483.mm.1 | NM_007894          | Ear1    | eosinophil-associated, ribonuclease A family, m | 43818765  | 43875517  | TC1400001868.mm.1 | 0.1  | 0.569311 |
| TC1200002484.mm.1 | NM_207142          | Olfr103 | olfactory receptor 1036                         | 86074704  | 86075718  | TC0200001267.mm.1 | 0.1  | 0.569448 |
| TC1200002485.mm.1 | ENSMUST00000177693 | Gm25700 | predicted gene, 25700                           | 86725823  | 86725932  | TC1300000384.mm.1 | 0.1  | 0.569547 |
| TC1200002488.mm.1 | ENSMUST00000164042 | Gm17555 | predicted gene, 17555                           | 126215100 | 126216212 | TC0200001896.mm.1 | 0.1  | 0.569586 |
| TC1200002494.mm.1 | NM_133707          | 1810019 | RIKEN cDNA 1810019J16 gene                      | 133518963 | 133530790 | TC0400001611.mm.1 | 0.0  | 0.569642 |
| TC1200002497.mm.1 | NR_035427          | Mir1195 | microRNA 1195                                   | 30368176  | 31275697  | TC1600001462.mm.1 | -0.2 | 0.569704 |
| TC1200002499.mm.1 | NM_009990          | Clip2   | CAP-GLY domain containing linker protein 2      | 134489383 | 134552434 | TC0500003373.mm.1 | 0.0  | 0.57001  |
| TC1200002500.mm.1 | ENSMUST00000157297 | Gm23229 | predicted gene, 23229                           | 118279861 | 118279965 | TC0700001694.mm.1 | 0.0  | 0.57005  |
| TC1200002508.mm.1 | ENSMUST00000183257 | Gm7693  | predicted gene 7693                             | 72712634  | 72713621  | TC0700003487.mm.1 | 0.0  | 0.570264 |
| TC1200002516.mm.1 | NM_177919          | Tceal5  | transcription elongation factor A (SII)-like 5  | 136200948 | 136203876 | TC0X00003022.mm.1 | 0.0  | 0.570424 |
| TC1200002524.mm.1 | NM_013659          | Sema4b  | sema domain, immunoglobulin domain (Ig), tran   | 80186841  | 80226524  | TC0700001145.mm.1 | -0.1 | 0.570728 |
| TC1200002525.mm.1 | ENSMUST00000178157 | Gm24925 | predicted gene, 24925                           | 50920542  | 50920648  | TC1600001715.mm.1 | -0.1 | 0.570918 |
| TC1200002528.mm.1 | ENSMUST00000165744 | Gm3739  | predicted gene 3739                             | 7293648   | 7315049   | TC1400002851.mm.1 | 0.0  | 0.570992 |
| TC1200002531.mm.1 | XR_105167          | B230325 | RIKEN cDNA B230325K18 gene                      | 127982526 | 127985701 | TC0700001872.mm.1 | -0.1 | 0.571152 |
| TC1200002532.mm.1 | NM_001034859       | Gm4841  | predicted gene 4841                             | 60268301  | 60273267  | TC1800001396.mm.1 | 0.0  | 0.57117  |
| TC1200002533.mm.1 | ENSMUST00000122716 | Gm23214 | predicted gene, 23214                           | 33011958  | 33012114  | TC0300000230.mm.1 | 0.0  | 0.571288 |
| TC1200002534.mm.1 | ENSMUST00000104393 | Gm24373 | predicted gene, 24373                           | 157210929 | 157211060 | TC0300001574.mm.1 | 0.1  | 0.571573 |
| TC1200002537.mm.1 | ENSMUST00000053865 | Gm5424  | predicted gene 5424                             | 62071015  | 62072609  | TC1000000578.mm.1 | 0.3  | 0.57176  |
| TC1200002539.mm.1 | NM_001163718       | Tsr3    | TSR3 20S rRNA accumulation                      | 25240170  | 25242799  | TC1700000367.mm.1 | 0.0  | 0.571865 |
| TC1200002540.mm.1 | NM_009115          | S100b   | S100 protein, beta polypeptide, neural          | 76253836  | 76261319  | TC1000000736.mm.1 | 0.0  | 0.571904 |
| TC1200002541.mm.1 | NM_001081671       | 1700042 | RIKEN cDNA 1700042B14 gene                      | 155124917 | 155147849 | TC0X00003234.mm.1 | 0.1  | 0.571953 |
| TC1200002554.mm.1 | ENSMUST00000157908 | Gm24998 | predicted gene, 24998                           | 34106156  | 34106244  | TC1400000369.mm.1 | 0.1  | 0.572651 |
| TC1200002555.mm.1 | NM_012033          | Tinag   | tubulointerstitial nephritis antigen            | 76951693  | 77045794  | TC0900002696.mm.1 | 0.1  | 0.572834 |
| TC1200002556.mm.1 | ENSMUST00000082672 | Gm25899 | predicted gene, 25899                           | 83527628  | 83527768  | TC0400002953.mm.1 | -0.1 | 0.572986 |
| TC1200002557.mm.1 | XM_985134          | Gm8210  | predicted pseudogene 8210                       | 43189119  | 43189773  | TC0100000321.mm.1 | -0.2 | 0.573003 |
| TC1200002558.mm.1 | NR_029568          | Mir181a | microRNA 181a-2                                 | 38852735  | 38852810  | TC0200000711.mm.1 | 0.0  | 0.573034 |
| TC1200002559.mm.1 | NM_001163538       | Pgam5   | phosphoglycerate mutase family member 5         | 110259130 | 110269913 | TC0500002985.mm.1 | 0.0  | 0.573104 |
| TC1200002560.mm.1 | ENSMUST00000183839 | RP24-37 | N/A                                             | 7194272   | 7195216   | TC0600000041.mm.1 | 0.0  | 0.573206 |
| TC1200002561.mm.1 | ENSMUST00000083532 | n-R5s89 | nuclear encoded rRNA 5S 89                      | 103011417 | 103011520 | TC0900002963.mm.1 | -0.2 | 0.573437 |
| TC1200002562.mm.1 | NR_030445          | Mir679  | microRNA 679                                    | 109715577 | 109715650 | TC1200001175.mm.1 | 0.1  | 0.57374  |
| TC1200002563.mm.1 | NR_073535          | Gm10364 | glyceraldehyde-3-phosphate dehydrogenase pse    | 55038462  | 55042979  | TC1900000771.mm.1 | 0.0  | 0.573743 |
| TC1200002564.mm.1 | ENSMUST00000082917 | Gm24525 | predicted gene, 24525                           | 7177706   | 7177856   | TC0500001920.mm.1 | -0.2 | 0.573923 |
| TC1200002565.mm.1 | ENSMUST00000177834 | SLY     | ---                                             | 55731744  | 55757903  | TC0Y00000156.mm.1 | 0.0  | 0.573946 |
| TC1200002566.mm.1 | NM_030098          | Rnase6  | ribonuclease, RNase A family, 6                 | 51129064  | 51131122  | TC1400000580.mm.1 | -0.2 | 0.574014 |
| TC1200002567.mm.1 | ENSMUST00000116535 | Gm15380 | predicted gene 15380                            | 75143688  | 75144470  | TC0X00000738.mm.1 | 0.0  | 0.574115 |
| TC1200002569.mm.1 | NR_003027          | Rnu6    | U6 small nuclear RNA                            | 14438480  | 14438506  | TC1900001195.mm.1 | -0.4 | 0.574202 |
| TC1200002570.mm.1 | ENSMUST00000157376 | Gm22883 | predicted gene, 22883                           | 87318694  | 87318799  | TC1100003474.mm.1 | -0.1 | 0.574271 |
| TC1200002571.mm.1 | NM_001081633       | Dgcr14  | DiGeorge syndrome critical region gene 14       | 17900709  | 17911348  | TC1600001301.mm.1 | -0.1 | 0.574376 |
| TC1200002572.mm.1 | NM_177798          | Frs2    | fibroblast growth factor receptor substrate 2   | 117070127 | 117148510 | TC1000002921.mm.1 | 0.0  | 0.574537 |
| TC1200002573.mm.1 | ENSMUST00000083938 | Gm25681 | predicted gene, 25681                           | 109863780 | 109863885 | TC0300001164.mm.1 | -0.1 | 0.574551 |
| TC1200002574.mm.1 | XM_001001111       | Gm8539  | predicted gene 8539                             | 21613991  | 21614530  | TC0500002020.mm.1 | -0.1 | 0.574821 |
| TC1200002575.mm.1 | NM_028780          | Tm9sf1  | transmembrane 9 superfamily member 1            | 55635965  | 55643806  | TC1400002864.mm.1 | 0.0  | 0.574951 |
| TC1200002576.mm.1 | ENSMUST00000158168 | Gm22540 | predicted gene, 22540                           | 44476416  | 44476532  | TC0900002168.mm.1 | 0.1  | 0.575372 |
| TC1200002577.mm.1 | ENSMUST00000082825 | Gm25475 | predicted gene, 25475                           | 101397589 | 101397768 | TC1100003802.mm.1 | -0.1 | 0.575509 |
| TC1200002578.mm.1 | NR_035415          | Mir1187 | microRNA 1187                                   | 82798944  | 82799065  | TC0500002665.mm.1 | 0.1  | 0.575664 |
| TC1200002579.mm.1 | NM_010821          | Mpeg1   | macrophage expressed gene 1                     | 12460779  | 12465285  | TC1900000246.mm.1 | -0.2 | 0.575769 |
| TC1200002580.mm.1 | NM_027000          | Gtppb4  | GTP binding protein 4                           | 8972071   | 8996017   | TC1300001419.mm.1 | -0.1 | 0.576294 |
| TC1200002581.mm.1 | ENSMUST00000171980 | Gm17631 | predicted gene, 17631                           | 129862649 | 129864393 | TC0600001540.mm.1 | 0.1  | 0.576581 |
| TC1200002582.mm.1 | NM_175382          | Fam72a  | family with sequence similarity 72, member A    | 131527903 | 131539872 | TC0100001170.mm.1 | 0.0  | 0.576631 |

|                   |                    |         |                                                 |           |           |                   |      |          |
|-------------------|--------------------|---------|-------------------------------------------------|-----------|-----------|-------------------|------|----------|
| TC1200002583.mm.1 | NM_009801          | Car2    | carbonic anhydrase 2                            | 14886426  | 14900770  | TC0300000096.mm.1 | 0.2  | 0.5767   |
| TC1200002584.mm.1 | NM_029929          | Vps33a  | vacuolar protein sorting 33A (yeast)            | 123528757 | 123573015 | TC0500003236.mm.1 | 0.1  | 0.57679  |
| TC1200002585.mm.1 | NM_138653          | Bspry   | B-box and SPRY domain containing                | 62480051  | 62497298  | TC0400000702.mm.1 | 0.0  | 0.576886 |
| TC1200002586.mm.1 | NM_009247          | Serpina | serine (or cysteine) peptidase inhibitor, clade | 103946931 | 103958975 | TC1200002285.mm.1 | -0.1 | 0.577354 |
| TC1200002587.mm.1 | ENSMUST00000178740 | Gm21735 | predicted gene, 21735                           | 38247727  | 38248431  | TC0Y00000124.mm.1 | 0.1  | 0.577387 |
| TC1200002588.mm.1 | NM_001018031       | Otol1   | otolin 1 homolog (zebrafish)                    | 70007613  | 70028708  | TC0300000591.mm.1 | 0.0  | 0.577399 |
| TC1200002590.mm.1 | NM_001037719       | Btla    | B and T lymphocyte associated                   | 45224315  | 45252895  | TC1600000674.mm.1 | -0.3 | 0.577505 |
| TC1200002591.mm.1 | NM_001025208       | LOC5473 | MHC class I family member                       | 0         | 0         | TSUnmapped000003  | 0.0  | 0.577623 |
| TC1200002592.mm.1 | ENSMUST00000082398 | mt-Ta   | mitochondrially encoded tRNA alanine            | 5018      | 5086      | TC0M00000021.mm.1 | 0.4  | 0.577651 |
| TC1200002593.mm.1 | NM_172871          | Klhl9   | kelch-like 9                                    | 88718292  | 88722508  | TC0400003016.mm.1 | -0.1 | 0.577673 |
| TC1200002594.mm.1 | NM_009303          | Syngr1  | synaptogyrin 1                                  | 80091296  | 80119501  | TC1500000693.mm.1 | 0.0  | 0.577735 |
| TC1200002595.mm.1 | NM_001012323       | Mup20   | major urinary protein 20                        | 62050234  | 62054158  | TC0400002779.mm.1 | -0.3 | 0.57774  |
| TC1200002596.mm.1 | NM_153542          | Lrrc20  | leucine rich repeat containing 20               | 61475833  | 61582242  | TC1000000566.mm.1 | 0.0  | 0.57775  |
| TC1200002597.mm.1 | NM_001033499       | Sh2d1b2 | SH2 domain protein 1B2                          | 170232749 | 170253608 | TC0100001567.mm.1 | 0.0  | 0.577804 |
| TC1200002598.mm.1 | ENSMUST00000082928 | Gm25038 | predicted gene, 25038                           | 78423730  | 78423859  | TC1600001940.mm.1 | 0.0  | 0.577966 |
| TC1200002599.mm.1 | NM_009699          | Aqp2    | aquaporin 2                                     | 99579056  | 99584545  | TC1500001017.mm.1 | 0.1  | 0.578018 |
| TC1200002600.mm.1 | NR_030564          | Hra466b | microRNA 466b-2                                 | 10498685  | 10498766  | TC0200000162.mm.1 | 0.1  | 0.578144 |
| TC1200002601.mm.1 | NM_145423          | Slc5a8  | solute carrier family 5 (iodide transporter), m | 88885992  | 88936085  | TC1000001085.mm.1 | 0.1  | 0.578244 |
| TC1200002603.mm.1 | NM_028069          | Cdhr5   | cadherin-related family member 5                | 141269083 | 141276786 | TC0700004531.mm.1 | 0.1  | 0.578314 |
| TC1200002604.mm.1 | NM_011136          | Pou2af1 | POU domain, class 2, associating factor 1       | 51213690  | 51240079  | TC0900000615.mm.1 | -0.3 | 0.578385 |
| TC1200002605.mm.1 | NM_172989          | Lpar1   | lysophosphatidic acid receptor 1                | 58435252  | 58553898  | TC0400002737.mm.1 | 0.0  | 0.578644 |
| TC1200002606.mm.1 | ENSMUST00000179846 | Gm25121 | predicted gene, 25121                           | 59364496  | 59364574  | TC0700003142.mm.1 | 0.0  | 0.57905  |
| TC1200002607.mm.1 | NM_013909          | Fbxl6   | F-box and leucine-rich repeat protein 6         | 76535723  | 76538746  | TC1500001780.mm.1 | 0.0  | 0.579219 |
| TC1200002608.mm.1 | NCBI_Gene:385253:p | Igkv4-5 | immunoglobulin kappa variable 4-55              | 69607275  | 69607801  | TC0600003571.mm.1 | -0.5 | 0.579239 |
| TC1200002609.mm.1 | NM_001099346       | Gm11937 | predicted gene 11937                            | 99609794  | 99610189  | TC1100003721.mm.1 | -0.1 | 0.579324 |
| TC1200002610.mm.1 | NM_173449          | Pp2d1   | protein phosphatase 2C-like domain containing : | 53507460  | 53539451  | TC1700002282.mm.1 | -0.1 | 0.579507 |
| TC1200002611.mm.1 | NM_010666          | Krt27   | keratin 27                                      | 99345565  | 99351118  | TC1100003704.mm.1 | 0.0  | 0.579649 |
| TC1200002612.mm.1 | NM_001243150       | Gm13286 | predicted gene 13286                            | 88757844  | 88758392  | TC0400000890.mm.1 | 0.0  | 0.579872 |
| TC1200002613.mm.1 | NM_025849          | 3110001 | RIKEN cDNA 3110001D03 gene                      | 75277354  | 75278305  | TC0400002873.mm.1 | -0.1 | 0.580061 |
| TC1200002614.mm.1 | ENSMUST00000103956 | Gm22938 | predicted gene, 22938                           | 76716628  | 76716747  | TC0900002691.mm.1 | 0.1  | 0.580117 |
| TC1200002615.mm.1 | NR_105748          | Mir6240 | microRNA mir-6240 (Mir6240), microRNA.          | 0         | 0         | TSUnmapped0000011 | 0.1  | 0.58032  |
| TC1200002616.mm.1 | ENSMUST00000083447 | Gm23096 | predicted gene, 23096                           | 49658763  | 49658869  | TC0300000349.mm.1 | -0.1 | 0.580362 |
| TC1200002617.mm.1 | ENSMUST00000182346 | Gm9081  | predicted gene 9081                             | 122169373 | 122170363 | TC1000001504.mm.1 | -0.1 | 0.580379 |
| TC1200002618.mm.1 | ENSMUST00000111107 | Gm11060 | predicted gene 11060                            | 105092018 | 105093760 | TC0200001575.mm.1 | 0.1  | 0.580394 |
| TC1200002619.mm.1 | NM_172565          | Klhl11  | kelch-like 11                                   | 100462612 | 100472782 | TC1100003774.mm.1 | -0.1 | 0.580522 |
| TC1200002620.mm.1 | XM_001473500       | Gm2423  | predicted gene 2423                             | 13232158  | 13234194  | TC1300001457.mm.1 | 0.1  | 0.580895 |
| TC1200002621.mm.1 | NR_029743          | Mir26b  | microRNA 26b                                    | 74394310  | 74394394  | TC1000000634.mm.1 | 0.0  | 0.581034 |
| TC1200002622.mm.1 | ENSMUST00000123949 | Gm12264 | predicted gene 12264                            | 59775286  | 59780321  | TC1100002860.mm.1 | 0.0  | 0.581091 |
| TC1200002623.mm.1 | NM_010183          | Fbrs    | fibrosin                                        | 127485221 | 127491513 | TC0700001847.mm.1 | -0.1 | 0.581121 |
| TC1200002624.mm.1 | ENSMUST00000121915 | Gm16077 | predicted gene 16077                            | 5092497   | 5093246   | TC1500000018.mm.1 | 0.2  | 0.581201 |
| TC1200002625.mm.1 | ENSMUST00000157519 | Gm24559 | predicted gene, 24559                           | 74906314  | 74906434  | TC0300001593.mm.1 | -0.1 | 0.581312 |
| TC1200002626.mm.1 | NM_172478          | Tbc1d25 | TBC1 domain family, member 25                   | 8154472   | 8176181   | TC0X00001798.mm.1 | 0.0  | 0.581477 |
| TC1200002627.mm.1 | NM_027097          | Klk12   | kallikrein related-peptidase 12                 | 43768897  | 43773576  | TC0700000771.mm.1 | 0.0  | 0.581621 |
| TC1200002628.mm.1 | XM_001472638       | Gm20801 | predicted gene, 20801                           | 81799149  | 81801497  | TC0Y00000500.mm.1 | 0.0  | 0.581686 |
| TC1200002629.mm.1 | ENSMUST00000159889 | Gm6493  | predicted gene 6493                             | 23014208  | 23017038  | TC1600001388.mm.1 | -0.1 | 0.582013 |
| TC1200002630.mm.1 | NM_007572          | C1qa    | complement component 1, q subcomponent, alfa    | 136895916 | 136898844 | TC0400003794.mm.1 | 0.1  | 0.582086 |
| TC1200002631.mm.1 | NM_001198859       | Ctbp1   | C-terminal binding protein 1                    | 33247723  | 33275004  | TC0500002214.mm.1 | -0.1 | 0.582427 |
| TC1200002632.mm.1 | ENSMUST00000180317 | Gm25873 | predicted gene, 25873                           | 43126233  | 43126339  | TC1600000624.mm.1 | -0.2 | 0.582601 |
| TC1200002633.mm.1 | NM_133358          | Zfp617  | zinc finger protein 617                         | 71922825  | 71934630  | TC0800003231.mm.1 | 0.0  | 0.582826 |
| TC1200002634.mm.1 | NM_001161745       | Hsd3b3  | hydroxy-delta-5-steroid dehydrogenase, 3 beta-  | 98741476  | 98763128  | TC0300002559.mm.1 | 0.1  | 0.582999 |
| TC1200002635.mm.1 | ENSMUST00000083155 | Gm26493 | predicted gene, 26493                           | 95746060  | 95746195  | TC0800002751.mm.1 | -0.3 | 0.583492 |
| TC1200002636.mm.1 | NR_029722          | Mir196a | microRNA 196a-2                                 | 102973341 | 102973450 | TC1500001118.mm.1 | 0.1  | 0.583502 |
| TC1200002638.mm.1 | NM_027256          | Ints4   | integrator complex subunit 4                    | 97480956  | 97541398  | TC0700001354.mm.1 | 0.1  | 0.583591 |
| TC1200002639.mm.1 | NM_181444          | Gprc5a  | G protein-coupled receptor, family C, group 5,  | 135065651 | 135084709 | TC0600001602.mm.1 | 0.1  | 0.583638 |
| TC1200002640.mm.1 | ENSMUST00000083728 | n-R5s16 | nuclear encoded rRNA 5S 161                     | 30379101  | 30379214  | TC0600000264.mm.1 | 0.1  | 0.583651 |
| TC1200002641.mm.1 | ENSMUST00000158376 | Gm23852 | predicted gene, 23852                           | 61070018  | 61070094  | TC1600000779.mm.1 | 0.1  | 0.583819 |
| TC1200002642.mm.1 | XR_140494          | Gm20099 | predicted gene, 20099                           | 18916652  | 18918882  | TC0200003053.mm.1 | -0.1 | 0.583974 |
| TC1200002643.mm.1 | ENSMUST00000120390 | Mup-ps1 | major urinary protein, pseudogene 19            | 61957149  | 61959911  | TC0400002776.mm.1 | -0.3 | 0.583976 |
| TC1200002644.mm.1 | ENSMUST00000183140 | Gm5181  | predicted gene 5181                             | 130120239 | 130121209 | TC1000001660.mm.1 | 0.0  | 0.583997 |
| TC1200002645.mm.1 | ENSMUST00000116906 | Mir467g | microRNA 467g                                   | 34732853  | 34732972  | TC0500002242.mm.1 | 0.1  | 0.584012 |
| TC1200002646.mm.1 | NM_013556          | Hprt    | hypoxanthine guanine phosphoribosyl transferase | 52988078  | 53021660  | TC0X00000471.mm.1 | 0.1  | 0.58412  |
| TC1200002647.mm.1 | ENSMUST00000082697 | n-R5s42 | nuclear encoded rRNA 5S 42                      | 87169113  | 87169216  | TC1500000841.mm.1 | 0.1  | 0.584318 |
| TC1200002648.mm.1 | ENSMUST00000175128 | Gm22192 | predicted gene, 22192                           | 32221970  | 32222054  | TC0200000569.mm.1 | -0.2 | 0.584397 |
| TC1200002649.mm.1 | ENSMUST00000083112 | Gm25632 | predicted gene, 25632                           | 32225653  | 32225737  | TC0200000570.mm.1 | -0.2 | 0.584397 |
| TC1200002650.mm.1 | ENSMUST00000104116 | Gm22471 | predicted gene, 22471                           | 5560606   | 5560735   | TC1100002144.mm.1 | 0.0  | 0.584426 |
| TC1200002651.mm.1 | NM_028469          | 3110082 | RIKEN cDNA 3110082I17 gene                      | 139359739 | 139460534 | TC0500003490.mm.1 | 0.0  | 0.584585 |
| TC1200002652.mm.1 | NM_001162494       | Fzd6    | frizzled homolog 6 (Drosophila)                 | 39006280  | 39038192  | TC1500000298.mm.1 | 0.0  | 0.58479  |
| TC1200002653.mm.1 | ENSMUST00000083394 | Gm22053 | predicted gene, 22053                           | 10478674  | 10478873  | TC1400000090.mm.1 | -0.1 | 0.584895 |
| TC1200002654.mm.1 | ENSMUST00000164967 | Gm7954  | predicted gene 7954                             | 41448203  | 41453518  | TC1400001797.mm.1 | 0.0  | 0.585037 |
| TC1200002655.mm.1 | NM_007457          | Ap1s1   | adaptor protein complex AP-1, sigma 1           | 137034993 | 137046135 | TC0500003430.mm.1 | 0.0  | 0.585299 |
| TC1200002656.mm.1 | ENSMUST00000104313 | Gm24230 | predicted gene, 24230                           | 54974651  | 54974779  | TC0600000659.mm.1 | 0.1  | 0.585347 |
| TC1200002657.mm.1 | ENSMUST00000177419 | Gm20677 | predicted gene 20677                            | 18846035  | 18846182  | TC1400000150.mm.1 | 0.1  | 0.585358 |
| TC1200002658.mm.1 | NR_028565          | Snord85 | small nucleolar RNA, C/D box 85                 | 130749634 | 130749706 | TC0400001550.mm.1 | 0.1  | 0.585492 |
| TC1200002659.mm.1 | NM_023873          | Cep70   | centrosomal protein 70                          | 99243442  | 99300404  | TC0900001247.mm.1 | 0.0  | 0.585659 |
| TC1200002660.mm.1 | NCBI_Gene:628571:p | Igkv4-6 | immunoglobulin kappa variable 4-63              | 69377944  | 69378472  | TC0600003563.mm.1 | -0.4 | 0.585827 |
| TC1200002661.mm.1 | ENSMUST00000086238 | Gm10181 | predicted gene 10181                            | 25089422  | 25089490  | TC0900000240.mm.1 | -0.2 | 0.58587  |
| TC1200002662.mm.1 | ENSMUST00000158857 | Gm24741 | predicted gene, 24741                           | 117574342 | 117574447 | TC1200001316.mm.1 | 0.1  | 0.585887 |
| TC1200002663.mm.1 | NR_030447          | Mir680- | microRNA 680-1                                  | 0         | 0         | TSUnmapped0000013 | 0.1  | 0.585897 |

|                   |                    |         |                                                  |           |           |                   |      |          |
|-------------------|--------------------|---------|--------------------------------------------------|-----------|-----------|-------------------|------|----------|
| TC1200002664.mm.1 | ENSMUST00000158026 | Gm24853 | predicted gene, 24853                            | 81501240  | 81501360  | TC1200000757.mm.1 | -0.1 | 0.585986 |
| TC1200002665.mm.1 | ENSMUST00000083227 | n-R5s16 | nuclear encoded rRNA 5S 167                      | 132591058 | 132591178 | TC0600001558.mm.1 | -0.1 | 0.586146 |
| TC1300000006.mm.1 | ENSMUST00000157423 | Gm23331 | predicted gene, 23331                            | 60500833  | 60500940  | TC0500002450.mm.1 | -0.1 | 0.586257 |
| TC1300000010.mm.1 | NM_028603          | Zbtb8a  | zinc finger and BTB domain containing 8a         | 129353628 | 129378116 | TC0400003593.mm.1 | 0.0  | 0.586316 |
| TC1300000019.mm.1 | NM_009700          | Aqp4    | aquaporin 4                                      | 15389394  | 15410982  | TC1800001017.mm.1 | 0.0  | 0.58635  |
| TC1300000023.mm.1 | ENSMUST00000083006 | Gm23239 | predicted gene, 23239                            | 77910140  | 77910320  | TC0700003538.mm.1 | 0.1  | 0.586816 |
| TC1300000028.mm.1 | NM_026129          | Erp29   | endoplasmic reticulum protein 29                 | 121428590 | 121452506 | TC0500003188.mm.1 | 0.0  | 0.587225 |
| TC1300000033.mm.1 | NM_027889          | Vps11   | vacuolar protein sorting 11 (yeast)              | 44348105  | 44361670  | TC0900002159.mm.1 | 0.1  | 0.587297 |
| TC1300000045.mm.1 | ENSMUST00000117034 | Gm23988 | predicted gene, 23988                            | 10501633  | 10501754  | TC0200000170.mm.1 | 0.1  | 0.587382 |
| TC1300000047.mm.1 | NR_028282          | Snord83 | small nucleolar RNA, C/D box 83B                 | 80078498  | 80078591  | TC1500001897.mm.1 | -0.2 | 0.587435 |
| TC1300000067.mm.1 | NM_007838          | Ddost   | dolichyl-di-phosphooligosaccharide-protein glyco | 138304730 | 138312628 | TC0400001722.mm.1 | 0.1  | 0.587558 |
| TC1300000069.mm.1 | NM_146296          | Olfr437 | olfactory receptor 437                           | 43167010  | 43168027  | TC0600000481.mm.1 | 0.1  | 0.587723 |
| TC1300000070.mm.1 | NR_029654          | Mir34c  | microRNA 34c                                     | 51103034  | 51103110  | TC0900002285.mm.1 | -0.1 | 0.587808 |
| TC1300000072.mm.1 | ENSMUST00000119238 | Gm5761  | predicted gene 5761                              | 137103889 | 137104722 | TC0X00003045.mm.1 | 0.0  | 0.587867 |
| TC1300000076.mm.1 | ENSMUST00000157402 | Gm22144 | predicted gene, 22144                            | 23643409  | 23643510  | TC1900000379.mm.1 | 0.1  | 0.587943 |
| TC1300000084.mm.1 | NM_178691          | Yod1    | YOD1 OTU deubiquitinating enzyme 1 homologu      | 130717327 | 130722073 | TC0100001158.mm.1 | 0.0  | 0.588061 |
| TC1300000087.mm.1 | NM_001037742       | Tywy5   | tRNA-yW synthesizing protein 5                   | 57388237  | 57407101  | TC0100002371.mm.1 | 0.0  | 0.588091 |
| TC1300000089.mm.1 | NM_009479          | Uros    | uroporphyrinogen III synthase                    | 133686243 | 133710072 | TC0700004428.mm.1 | 0.0  | 0.588131 |
| TC1300000096.mm.1 | NM_001252149       | Klra14  | killer cell lectin-like receptor subfamily A, m  | 130082711 | 130162612 | TC0600003610.mm.1 | 0.0  | 0.588903 |
| TC1300000117.mm.1 | NM_001081060       | Slc9a3  | solute carrier family 9 (sodium/hydrogen exchan  | 74121515  | 74169441  | TC1300000894.mm.1 | 0.1  | 0.589024 |
| TC1300000119.mm.1 | NM_001033438       | Gm906   | predicted gene 906                               | 50245181  | 50250308  | TC1300001971.mm.1 | -0.1 | 0.589115 |
| TC1300000124.mm.1 | NM_027947          | Zbtb43  | zinc finger and BTB domain containing 43         | 33450287  | 33468559  | TC0200003327.mm.1 | -0.1 | 0.589275 |
| TC1300000126.mm.1 | NM_009944          | Cox7a1  | cytochrome c oxidase subunit VIIa 1              | 30184171  | 30186030  | TC0700000552.mm.1 | -0.1 | 0.589445 |
| TC1300000140.mm.1 | XM_001481340       | Ssxa1   | synovial sarcoma, X member A, breakpoint 1       | 21115820  | 21122088  | TC0X00000223.mm.1 | 0.0  | 0.589638 |
| TC1300000142.mm.1 | NM_183256          | Cox14   | cytochrome c oxidase assembly protein 14         | 99725618  | 99728136  | TC1500001024.mm.1 | 0.0  | 0.589645 |
| TC1300000143.mm.1 | ENSMUST00000179186 | Gm22254 | predicted gene, 22254                            | 74505055  | 74505164  | TC0600002512.mm.1 | 0.1  | 0.589726 |
| TC1300000144.mm.1 | NM_145604          | D230025 | RIKEN cDNA D230025D16 gene                       | 105225145 | 105253053 | TC0800001207.mm.1 | 0.0  | 0.589743 |
| TC1300000145.mm.1 | ENSMUST00000059005 | Gm11868 | predicted gene 11868                             | 18844202  | 18845679  | TC0400002265.mm.1 | 0.0  | 0.589773 |
| TC1300000148.mm.1 | ENSMUST00000117970 | Gm13526 | predicted gene 13526                             | 57214054  | 57214242  | TC0200003563.mm.1 | 0.0  | 0.58989  |
| TC1300000160.mm.1 | NM_001242945       | Gm3264  | predicted gene 3264                              | 48555576  | 4875851   | TC1400002793.mm.1 | 0.0  | 0.590024 |
| TC1300000162.mm.1 | ENSMUST00000118021 | Defa-ps | defensin, alpha, pseudogene 4                    | 21119166  | 21119348  | TC0800000218.mm.1 | 0.0  | 0.590224 |
| TC1300000163.mm.1 | NM_025806          | Plbd1   | phospholipase B domain containing 1              | 136612070 | 136661928 | TC0600003329.mm.1 | 0.1  | 0.590291 |
| TC1300000173.mm.1 | ENSMUST00000158536 | Gm24130 | predicted gene, 24130                            | 65158258  | 65158408  | TC1300000788.mm.1 | -0.1 | 0.590516 |
| TC1300000174.mm.1 | ENSMUST00000157723 | Gm23865 | predicted gene, 23865                            | 29931427  | 29931523  | TC0200003259.mm.1 | -0.1 | 0.590658 |
| TC1300000175.mm.1 | ENSMUST00000158013 | Gm25846 | predicted gene, 25846                            | 75714790  | 75714924  | TC0300000607.mm.1 | 0.1  | 0.590834 |
| TC1300000176.mm.1 | ENSMUST00000118667 | Mup-ps5 | major urinary protein, pseudogene 5              | 60597597  | 60597695  | TC0400000676.mm.1 | -0.1 | 0.59111  |
| TC1300000177.mm.1 | ENSMUST00000118093 | Gm11865 | predicted gene 11865                             | 16246269  | 16249514  | TC0400000144.mm.1 | 0.1  | 0.591372 |
| TC1300000179.mm.1 | XM_001473524       | Gm2427  | predicted gene 2427                              | 85498215  | 85514726  | TC0100000757.mm.1 | 0.1  | 0.591394 |
| TC1300000181.mm.1 | NM_054094          | Acsm1   | acyl-CoA synthetase medium-chain family memt     | 119607026 | 119662515 | TC0700001711.mm.1 | 0.1  | 0.591408 |
| TC1300000182.mm.1 | NM_022889          | Pes1    | pescadillo homolog 1, containing BRCT domain (   | 3963975   | 3980004   | TC1100000028.mm.1 | -0.1 | 0.591621 |
| TC1300000191.mm.1 | NM_013719          | Eif2ak4 | eukaryotic translation initiation factor 2 alph  | 118388617 | 118475234 | TC0200001735.mm.1 | 0.0  | 0.591718 |
| TC1300000192.mm.1 | ENSMUST00000122180 | Gm12138 | predicted gene 12138                             | 40672906  | 40673856  | TC1100002547.mm.1 | 0.1  | 0.592012 |
| TC1300000199.mm.1 | ENSMUST00000178117 | Gm6728  | predicted gene 6728                              | 136486122 | 136490139 | TC0600003327.mm.1 | 0.1  | 0.592183 |
| TC1300000209.mm.1 | NM_175224          | Metap1  | methionyl aminopeptidase 1                       | 138458956 | 138489382 | TC0300003020.mm.1 | 0.1  | 0.592189 |
| TC1300000216.mm.1 | ENSMUST00000103976 | Gm22115 | predicted gene, 22115                            | 8949921   | 8950053   | TC1300001416.mm.1 | -0.1 | 0.5924   |
| TC1300000218.mm.1 | ENSMUST00000104108 | Gm23923 | predicted gene, 23923                            | 8955932   | 8956064   | TC1300001417.mm.1 | -0.1 | 0.5924   |
| TC1300000238.mm.1 | XM_001480439       | Gm10480 | predicted gene 10480                             | 18195513  | 18217757  | TC1200000153.mm.1 | -0.1 | 0.592577 |
| TC1300000241.mm.1 | ENSMUST00000082631 | Gm24145 | predicted gene, 24145                            | 11167105  | 11167267  | TC1600001210.mm.1 | 0.1  | 0.59272  |
| TC1300000244.mm.1 | ENSMUST00000174153 | Mthfr-p | 5,10-methylenetetrahydrofolate reductase, pseu   | 78473885  | 78474735  | TC0500000746.mm.1 | 0.0  | 0.592799 |
| TC1300000245.mm.1 | ENSMUST00000157747 | Gm22881 | predicted gene, 22881                            | 135148648 | 135148781 | TC0600001603.mm.1 | 0.0  | 0.592838 |
| TC1300000246.mm.1 | ENSMUST00000178512 | Gm24307 | predicted gene, 24307                            | 149576461 | 149576561 | TC0600001778.mm.1 | 0.2  | 0.592846 |
| TC1300000247.mm.1 | NM_001277310       | Mea1    | male enhanced antigen 1                          | 46680453  | 46683126  | TC1700000900.mm.1 | 0.0  | 0.593057 |
| TC1300000249.mm.1 | NM_020288          | Olfr749 | olfactory receptor 749                           | 50736218  | 50744324  | TC1400001984.mm.1 | 0.0  | 0.593058 |
| TC1300000250.mm.1 | NM_001008232       | Asap3   | ArfGAP with SH3 domain, ankyrin repeat and PH    | 136206365 | 136246573 | TC0400001679.mm.1 | 0.0  | 0.593741 |
| TC1300000254.mm.1 | XM_001477820       | Gm20927 | predicted gene, 20927                            | 54968754  | 54969437  | TC0Y00000384.mm.1 | 0.1  | 0.593788 |
| TC1300000255.mm.1 | ENSMUST00000114231 | Gm11146 | predicted gene 11146                             | 77588578  | 77602094  | TC0600001934.mm.1 | 0.1  | 0.593985 |
| TC1300000258.mm.1 | NM_027204          | Mrpl12  | mitochondrial ribosomal protein L12              | 120484613 | 120489065 | TC1100002029.mm.1 | 0.0  | 0.594174 |
| TC1300000259.mm.1 | NM_027227          | Glod5   | glyoxalase domain containing 5                   | 8004200   | 8018492   | TC0X00001790.mm.1 | 0.1  | 0.594312 |
| TC1300000260.mm.1 | NM_008339          | Cd79b   | CD79B antigen                                    | 106311341 | 106314762 | TC1100003920.mm.1 | -0.4 | 0.594347 |
| TC1300000261.mm.1 | ENSMUST00000157890 | Gm23043 | predicted gene, 23043                            | 51655767  | 51655875  | TC0400000561.mm.1 | 0.1  | 0.594475 |
| TC1300000262.mm.1 | NR_040456_2        | RP23-14 | N/A                                              | 106185743 | 106190099 | TC0700004003.mm.1 | 0.1  | 0.594609 |
| TC1300000266.mm.1 | NM_026373          | Cdk2ap2 | CDK2-associated protein 2                        | 4097182   | 4099019   | TC1900000026.mm.1 | 0.0  | 0.59488  |
| TC1300000268.mm.1 | ENSMUST00000157836 | Gm24748 | predicted gene, 24748                            | 191196906 | 191197013 | TC0100001838.mm.1 | 0.0  | 0.594903 |
| TC1300000280.mm.1 | NM_001163528       | Itprilp | inositol 1,4,5-triphosphate receptor interactin  | 127138769 | 127143457 | TC0200004548.mm.1 | 0.1  | 0.594924 |
| TC1300000284.mm.1 | NM_009721          | Atp1b1  | ATPase, Na+/K+ transporting, beta 1 polypeptide  | 164437099 | 164458355 | TC0100003422.mm.1 | -0.3 | 0.595312 |
| TC1300000290.mm.1 | ENSMUST00000175405 | Gm23370 | predicted gene, 23370                            | 127331813 | 127331941 | TC0100001117.mm.1 | -0.2 | 0.595573 |
| TC1300000307.mm.1 | NM_026678          | Blvra   | biliverdin reductase A                           | 127070657 | 127097084 | TC0200001906.mm.1 | 0.0  | 0.595646 |
| TC1300000310.mm.1 | NM_146441          | Olfr933 | olfactory receptor 933                           | 38975651  | 38976653  | TC0900000423.mm.1 | 0.1  | 0.595719 |
| TC1300000312.mm.1 | NM_001024853       | Timm9   | translocase of inner mitochondrial membrane 9    | 71123172  | 71136675  | TC1200001893.mm.1 | 0.0  | 0.595814 |
| TC1300000321.mm.1 | XM_003689071       | Gm21497 | predicted gene, 21497                            | 61648177  | 61672669  | TC0Y00000169.mm.1 | 0.0  | 0.595893 |
| TC1300000329.mm.1 | ENSMUST00000119438 | Rpl10-p | ribosomal protein L10, pseudogene 1              | 105554201 | 105554845 | TC0200004266.mm.1 | -0.1 | 0.596046 |
| TC1300000336.mm.1 | NM_001101503       | A230065 | RIKEN cDNA A230065H16 gene                       | 111406809 | 111412077 | TC1200001235.mm.1 | 0.0  | 0.596091 |
| TC1300000338.mm.1 | NM_172049          | Tmem18  | transmembrane protein 18                         | 30584443  | 30591219  | TC1200000255.mm.1 | 0.1  | 0.596135 |
| TC1300000345.mm.1 | NM_018855          | Gas8    | growth arrest specific 8                         | 123518835 | 123536650 | TC0800001528.mm.1 | 0.0  | 0.596393 |
| TC1300000346.mm.1 | NM_026833          | Wash    | WAS protein family homolog                       | 66111546  | 66120503  | TC1700001083.mm.1 | 0.0  | 0.596588 |
| TC1300000353.mm.1 | ENSMUST00000119380 | Gm8312  | predicted gene 8312                              | 67169613  | 67170230  | TC0X00002362.mm.1 | 0.0  | 0.597132 |
| TC1300000358.mm.1 | ENSMUST00000175421 | Gm22184 | predicted gene, 22184                            | 86574100  | 86574161  | TC0600002640.mm.1 | 0.1  | 0.597407 |
| TC1300000359.mm.1 | ENSMUST00000158101 | Gm22210 | predicted gene, 22210                            | 63533068  | 63533211  | TC1800000653.mm.1 | 0.0  | 0.597486 |

|                   |                    |         |                                                 |           |           |                    |      |          |
|-------------------|--------------------|---------|-------------------------------------------------|-----------|-----------|--------------------|------|----------|
| TC1300000362.mm.1 | NM_013549          | Hist2h2 | histone cluster 2, H2aa1                        | 96239716  | 96240374  | TC0300002501.mm.1  | 0.1  | 0.59754  |
| TC1300000364.mm.1 | ENSMUST00000178475 | Gm22070 | predicted gene, 22070                           | 114991541 | 114991647 | TC1000001325.mm.1  | -0.1 | 0.597758 |
| TC1300000366.mm.1 | NM_053225          | Vmn1r50 | vomeronasal 1 receptor 50                       | 90107275  | 90108207  | TC0600001061.mm.1  | 0.0  | 0.597771 |
| TC1300000379.mm.1 | NM_001253685       | Dnajc12 | Dnaj (Hsp40) homolog, subfamily C, member 12    | 63382443  | 63408840  | TC1000000604.mm.1  | 0.0  | 0.5979   |
| TC1300000384.mm.1 | NM_025837          | Mpi     | mannose phosphate isomerase                     | 57544256  | 57552763  | TC0900002374.mm.1  | 0.0  | 0.597977 |
| TC1300000385.mm.1 | NM_026432          | Tmem66  | transmembrane protein 66                        | 34154563  | 34170847  | TC0800000403.mm.1  | -0.1 | 0.598097 |
| TC1300000392.mm.1 | ENSMUST00000122640 | Gm25176 | predicted gene, 25176                           | 26260369  | 26260493  | TC1900001300.mm.1  | -0.1 | 0.598233 |
| TC1300000395.mm.1 | NM_146565          | Olfr837 | olfactory receptor 837                          | 19136928  | 19137967  | TC0900000146.mm.1  | 0.1  | 0.598452 |
| TC1300000404.mm.1 | ENSMUST00000082843 | Gm25204 | predicted gene, 25204                           | 36767425  | 36767530  | TC1400000390.mm.1  | -0.1 | 0.598509 |
| TC1300000406.mm.1 | ENSMUST00000178550 | Gm21742 | predicted gene, 21742                           | 90843934  | 90844074  | TC0Y00000225.mm.1  | -0.1 | 0.598683 |
| TC1300000409.mm.1 | ENSMUST00000094335 | Gm6505  | predicted pseudogene 6505                       | 28764234  | 28765364  | TC0300001769.mm.1  | 0.1  | 0.59943  |
| TC1300000425.mm.1 | ENSMUST00000118421 | Gm13880 | predicted gene 13880                            | 103819003 | 103819476 | TC0200004232.mm.1  | -0.1 | 0.599629 |
| TC1300000441.mm.1 | ENSMUST00000178782 | Gm25074 | predicted gene, 25074                           | 59776724  | 59776817  | TC0700003309.mm.1  | -0.1 | 0.599711 |
| TC1300000442.mm.1 | NM_008285          | Hrh1    | histamine receptor H1                           | 114397936 | 114483296 | TC0600001269.mm.1  | 0.0  | 0.599731 |
| TC1300000443.mm.1 | NM_198862          | Nlgn2   | neuroligin 2                                    | 69823122  | 69837784  | TC1100003069.mm.1  | 0.0  | 0.599746 |
| TC1300000445.mm.1 | NM_007907          | Eef2    | eukaryotic translation elongation factor 2      | 81176631  | 81182509  | TC1000000884.mm.1  | -0.1 | 0.599754 |
| TC1300000459.mm.1 | ENSMUST00000102000 | Gm23422 | predicted gene, 23422                           | 70596815  | 70596921  | TC0100000587.mm.1  | 0.1  | 0.599756 |
| TC1300000460.mm.1 | ENSMUST00000178715 | Gm10784 | predicted pseudogene 10784                      | 49945096  | 49945335  | TC1300001968.mm.1  | -0.1 | 0.599962 |
| TC1300000461.mm.1 | NCBI_Gene:780803:p | Ighv3-1 | immunoglobulin heavy variable 3-1               | 113964388 | 113964818 | TC1200002578.mm.1  | -0.2 | 0.600062 |
| TC1300000463.mm.1 | ENSMUST00000164753 | Gm17420 | predicted gene, 17420                           | 116032146 | 116032313 | TC05000003110.mm.1 | 0.1  | 0.600123 |
| TC1300000475.mm.1 | NCBI_Gene:10012435 | Traj38  | T cell receptor alpha joining 38                | 54180574  | 54180635  | TC1400000731.mm.1  | -0.2 | 0.600159 |
| TC1300000476.mm.1 | ENSMUST00000083228 | Gm23645 | predicted gene, 23645                           | 106260206 | 106260313 | TC1100001778.mm.1  | -0.2 | 0.600244 |
| TC1300000481.mm.1 | NM_007843          | Defb1   | defensin beta 1                                 | 21776555  | 21795185  | TC0800000259.mm.1  | 0.2  | 0.600343 |
| TC1300000490.mm.1 | ENSMUST00000121941 | Gm13077 | predicted gene 13077                            | 152157007 | 152157490 | TC0400004091.mm.1  | 0.0  | 0.600878 |
| TC1300000498.mm.1 | ENSMUST00000158186 | Gm22381 | predicted gene, 22381                           | 73756037  | 73756143  | TC1100001027.mm.1  | -0.1 | 0.601142 |
| TC1300000537.mm.1 | ENSMUST00000175088 | Gm23159 | predicted gene, 23159                           | 76958422  | 76958498  | TC0400002895.mm.1  | -0.1 | 0.601229 |
| TC1300000540.mm.1 | NM_146355          | Olfr692 | olfactory receptor 692                          | 105368230 | 105369355 | TC0700001548.mm.1  | 0.1  | 0.601251 |
| TC1300000554.mm.1 | NM_024256          | B3gat3  | beta-1,3-glucuronyltransferase 3 (glucuronosylt | 8920374   | 8927236   | TC1900000166.mm.1  | 0.0  | 0.601537 |
| TC1300000560.mm.1 | ENSMUST00000178312 | Gm21897 | predicted gene, 21897                           | 15317458  | 15318957  | TC1600000188.mm.1  | 0.2  | 0.601639 |
| TC1300000564.mm.1 | ENSMUST00000180363 | Gm10858 | predicted gene 10858                            | 146895792 | 146896196 | TC05000003617.mm.1 | -0.1 | 0.601743 |
| TC1300000566.mm.1 | NM_001252330       | Slc6a15 | solute carrier family 6 (neurotransmitter trans | 103367808 | 103419379 | TC1000001244.mm.1  | 0.1  | 0.60221  |
| TC1300000568.mm.1 | NR_030449          | Mir680- | microRNA 680-3                                  | 25867370  | 25894505  | TC1000001909.mm.1  | -0.1 | 0.602512 |
| TC1300000569.mm.1 | NM_146342          | Olfr126 | olfactory receptor 1269                         | 90118600  | 90119617  | TC0200004080.mm.1  | 0.0  | 0.60265  |
| TC1300000570.mm.1 | ENSMUST00000101568 | Gm10479 | predicted gene 10479                            | 20415938  | 20433699  | TC1200000175.mm.1  | -0.1 | 0.602915 |
| TC1300000573.mm.1 | NM_183222          | Fcrl5   | Fc receptor-like 5                              | 87435782  | 87500678  | TC0300000695.mm.1  | -0.1 | 0.602932 |
| TC1300000588.mm.1 | ENSMUST00000083757 | n-R5s77 | nuclear encoded rRNA 5S 77                      | 78314165  | 78314283  | TC1000000782.mm.1  | 0.1  | 0.603658 |
| TC1300000589.mm.1 | ENSMUST00000180218 | Gm24415 | predicted gene, 24415                           | 90054409  | 90054515  | TC1500002063.mm.1  | 0.1  | 0.603809 |
| TC1300000590.mm.1 | NM_133803          | Dpp3    | dipeptidylpeptidase 3                           | 4907229   | 4928287   | TC1900000941.mm.1  | -0.1 | 0.603944 |
| TC1300000594.mm.1 | NM_001177485       | Gm15284 | predicted gene 15284                            | 21134642  | 21135598  | TC0800000219.mm.1  | 0.0  | 0.604033 |
| TC1300000599.mm.1 | NM_176968          | Nt5dc1  | 5-nucleotidase domain containing 1              | 34288288  | 34418552  | TC1000002000.mm.1  | -0.1 | 0.604059 |
| TC1300000601.mm.1 | NM_001271772       | Skil    | SKI-like                                        | 31095058  | 31122923  | TC0300000210.mm.1  | 0.0  | 0.604076 |
| TC1300000606.mm.1 | ENSMUST00000104007 | Gm24796 | predicted gene, 24796                           | 93600979  | 93601085  | TC0400000939.mm.1  | 0.1  | 0.604181 |
| TC1300000607.mm.1 | ENSMUST00000102365 | Gm26340 | predicted gene, 26340                           | 134448574 | 134448672 | TC0500001555.mm.1  | 0.0  | 0.604482 |
| TC1300000612.mm.1 | NM_001024721       | BC09491 | cDNA sequence BC094916                          | 173519717 | 173535957 | TC0100003590.mm.1  | -0.2 | 0.604594 |
| TC1300000619.mm.1 | NM_001033532       | AW55491 | expressed sequence AW554918                     | 25168999  | 25467321  | TC1800000209.mm.1  | 0.0  | 0.604624 |
| TC1300000626.mm.1 | NM_027327          | 2210013 | RIKEN cDNA 2210013O21 gene                      | 153723554 | 153741322 | TC0X00001564.mm.1  | 0.0  | 0.60465  |
| TC1300000633.mm.1 | ENSMUST00000083863 | Gm25512 | predicted gene, 25512                           | 164601936 | 164602042 | TC0200002523.mm.1  | 0.1  | 0.604665 |
| TC1300000635.mm.1 | NM_194269          | Morn2   | MORN repeat containing 2                        | 80290212  | 80297476  | TC1700001213.mm.1  | 0.1  | 0.604736 |
| TC1300000643.mm.1 | NM_145451          | Gpx6    | glutathione peroxidase 6                        | 21312203  | 21319624  | TC1300000162.mm.1  | 0.1  | 0.604761 |
| TC1300000655.mm.1 | NM_026520          | Fam122a | family with sequence similarity 122, member A   | 24475779  | 24477474  | TC1900001282.mm.1  | 0.0  | 0.604796 |
| TC1300000658.mm.1 | NR_033120          | Klk1b7- | kallikrein 1-related peptidase b7, pseudogene   | 43942662  | 43945927  | TC0700000782.mm.1  | -0.1 | 0.604807 |
| TC1300000667.mm.1 | NR_029791          | Mir139  | microRNA 139                                    | 101475376 | 101475443 | TC0700001433.mm.1  | 0.1  | 0.605093 |
| TC1300000670.mm.1 | NM_009324          | Tbx2    | T-box 2                                         | 85832551  | 85841948  | TC1100001302.mm.1  | 0.0  | 0.605247 |
| TC1300000671.mm.1 | ENSMUST00000170766 | Gm14038 | predicted gene 14038                            | 134762073 | 134763642 | TC0200004693.mm.1  | 0.1  | 0.605319 |
| TC1300000674.mm.1 | ENSMUST00000174597 | Stk19-p | serine/threonine kinase 19, pseudogene 1        | 34744753  | 34747154  | TC1700001924.mm.1  | 0.0  | 0.605335 |
| TC1300000675.mm.1 | NM_001243760       | Ciita   | class II transactivator                         | 10480072  | 10527564  | TC1600000116.mm.1  | -0.2 | 0.605346 |
| TC1300000691.mm.1 | ENSMUST00000120720 | Mup-ps1 | major urinary protein, pseudogene 1             | 60085840  | 60088577  | TC0400000664.mm.1  | -0.1 | 0.605445 |
| TC1300000696.mm.1 | NM_007664          | Cdh2    | cadherin 2                                      | 16588877  | 16809246  | TC1800001026.mm.1  | 0.0  | 0.605494 |
| TC1300000726.mm.1 | XM_156070          | Gm4758  | predicted gene 4758                             | 36308039  | 36312653  | TC1600000513.mm.1  | 0.1  | 0.60554  |
| TC1300000732.mm.1 | ENSMUST00000104230 | Gm23745 | predicted gene, 23745                           | 53905696  | 53905820  | TC0400000592.mm.1  | 0.1  | 0.605742 |
| TC1300000740.mm.1 | NM_007797          | Ctla2b  | cytotoxic T lymphocyte-associated protein 2 bet | 60895351  | 60897447  | TC1300002141.mm.1  | 0.1  | 0.605758 |
| TC1300000742.mm.1 | NM_001163552       | Ap4b1   | adaptor-related protein complex AP-4, beta 1    | 103809517 | 103822025 | TC0300001061.mm.1  | 0.0  | 0.605851 |
| TC1300000749.mm.1 | NM_025779          | Ccdc109 | coiled-coil domain containing 109B              | 129914960 | 129970206 | TC0300002938.mm.1  | 0.0  | 0.606003 |
| TC1300000750.mm.1 | NM_011237          | Rad9a   | RAD9 homolog A                                  | 4195196   | 4201603   | TC1900000908.mm.1  | -0.1 | 0.606195 |
| TC1300000751.mm.1 | NM_021278          | Tmsb4x  | thymosin, beta 4, X chromosome                  | 167207093 | 167209315 | TC0X00003358.mm.1  | 0.0  | 0.606475 |
| TC1300000754.mm.1 | ENSMUST00000158983 | Gm22503 | predicted gene, 22503                           | 44732353  | 44732467  | TC1000000418.mm.1  | 0.1  | 0.606639 |
| TC1300000761.mm.1 | ENSMUST00000178574 | Gm25198 | predicted gene, 25198                           | 88015924  | 88016033  | TC0100000833.mm.1  | 0.1  | 0.60686  |
| TC1300000762.mm.1 | NR_027990          | Enoph1  | enolase-phosphatase 1                           | 100039994 | 100068765 | TC0500000971.mm.1  | 0.0  | 0.607013 |
| TC1300000778.mm.1 | NM_026062          | Fam69a  | family with sequence similarity 69, member A    | 107908042 | 107987085 | TC0500002936.mm.1  | 0.1  | 0.607068 |
| TC1300000788.mm.1 | NM_026184          | Ero1lb  | ERO1-like beta (S. cerevisiae)                  | 12565883  | 12611396  | TC1300000072.mm.1  | -0.1 | 0.60723  |
| TC1300000794.mm.1 | ENSMUST00000083281 | Gm26263 | predicted gene, 26263                           | 77898283  | 77898446  | TC0100002623.mm.1  | 0.1  | 0.607342 |
| TC1300000795.mm.1 | ENSMUST00000082534 | Gm25081 | predicted gene, 25081                           | 38480338  | 38480445  | TC0200000699.mm.1  | -0.1 | 0.607507 |
| TC1300000796.mm.1 | ENSMUST00000096093 | Gm5989  | predicted pseudogene 5989                       | 23157986  | 23160061  | TC0600001927.mm.1  | 0.0  | 0.60763  |
| TC1300000802.mm.1 | ENSMUST00000104123 | Gm24709 | predicted gene, 24709                           | 56583715  | 56583846  | TC0600002335.mm.1  | 0.1  | 0.607745 |
| TC1300000803.mm.1 | NM_145985          | Arcn1   | archain 1                                       | 44741564  | 44767845  | TC09000002175.mm.1 | -0.1 | 0.607756 |
| TC1300000812.mm.1 | ENSMUST00000122603 | Gm24840 | predicted gene, 24840                           | 123628201 | 123628347 | TC0500001425.mm.1  | 0.1  | 0.608216 |
| TC1300000813.mm.1 | ENSMUST00000118427 | Gm12717 | predicted gene 12717                            | 103940959 | 103941941 | TC0400001080.mm.1  | -0.1 | 0.608571 |
| TC1300000814.mm.1 | NM_001013773       | Nxpe5   | neurexophilin and PC-esterase domain family, m  | 138225898 | 138253363 | TC0500001648.mm.1  | 0.0  | 0.608806 |

|                   |                    |         |                                                 |           |           |                    |      |          |
|-------------------|--------------------|---------|-------------------------------------------------|-----------|-----------|--------------------|------|----------|
| TC1300000815.mm.1 | ENSMUST00000158285 | Gm22608 | predicted gene, 22608                           | 68908020  | 68908122  | TC1100000885.mm.1  | 0.1  | 0.608977 |
| TC1300000817.mm.1 | NM_011397          | Slc23a1 | solute carrier family 23 (nucleobase transporte | 35614604  | 35627244  | TC1800001175.mm.1  | 0.1  | 0.609233 |
| TC1300000818.mm.1 | NM_026958          | Slrp    | SRA stem-loop interacting RNA binding protein   | 87443896  | 87452206  | TC1200000878.mm.1  | -0.1 | 0.609253 |
| TC1300000819.mm.1 | NM_008138          | Gnai2   | guanine nucleotide binding protein (G protein), | 107614138 | 107635342 | TC0900003038.mm.1  | 0.1  | 0.609702 |
| TC1300000827.mm.1 | NM_001033432       | Heca    | headcase homolog (Drosophila)                   | 17900084  | 17948067  | TC1000001799.mm.1  | 0.0  | 0.609754 |
| TC1300000830.mm.1 | ENSMUST00000119335 | Gm9051  | predicted gene 9051                             | 96224308  | 96225727  | TC0X00002675.mm.1  | 0.0  | 0.609798 |
| TC1300000833.mm.1 | ENSMUST00000118700 | Gm9164  | predicted gene 9164                             | 103887599 | 103888612 | TC0X00002787.mm.1  | 0.0  | 0.610122 |
| TC1300000838.mm.1 | ENSMUST00000179948 | Gm23003 | predicted gene, 23003                           | 55594782  | 55594888  | TC1600001738.mm.1  | -0.1 | 0.610283 |
| TC1300000846.mm.1 | ENSMUST00000104484 | Gm24472 | predicted gene, 24472                           | 87066893  | 87067024  | TC0300000690.mm.1  | 0.2  | 0.610364 |
| TC1300000857.mm.1 | NM_001146711       | Ppp1r18 | protein phosphatase 1, regulatory subunit 18    | 35865593  | 35875596  | TC1700000707.mm.1  | 0.0  | 0.610843 |
| TC1300000861.mm.1 | NM_009244          | Serpina | serine (or cysteine) preptidase inhibitor, clad | 103728156 | 103738189 | TC1200002531.mm.1  | -0.1 | 0.611053 |
| TC1300000868.mm.1 | ENSMUST00000119937 | Gm15574 | predicted gene 15574                            | 32880011  | 32880608  | TC0300001804.mm.1  | 0.1  | 0.611143 |
| TC1300000880.mm.1 | NM_001033305       | Ndufb6  | NADH dehydrogenase (ubiquinone) 1 beta subcc    | 40270591  | 40279421  | TC0400002437.mm.1  | 0.1  | 0.611278 |
| TC1300000884.mm.1 | NM_001011866       | Olfr309 | olfactory receptor 309                          | 86306185  | 86313509  | TC0700003689.mm.1  | -0.1 | 0.611291 |
| TC1300000887.mm.1 | NM_001168506       | Zfp574  | zinc finger protein 574                         | 25077205  | 25083492  | TC0700000405.mm.1  | 0.0  | 0.611431 |
| TC1300000889.mm.1 | NM_199015          | Pfh11d  | PHD finger protein 11D                          | 59347407  | 59365490  | TC1400002869.mm.1  | 0.0  | 0.611484 |
| TC1300000894.mm.1 | ENSMUST00000104687 | Gm23912 | predicted gene, 23912                           | 109618114 | 109618200 | TC1200001145.mm.1  | -0.1 | 0.611576 |
| TC1300000904.mm.1 | NM_027172          | Slc52a3 | solute carrier protein family 52, member 3      | 151996511 | 152009258 | TC0200002272.mm.1  | 0.0  | 0.611659 |
| TC1300000907.mm.1 | NM_172830          | Slc4a9  | solute carrier family 4, sodium bicarbonate cot | 36528152  | 36556273  | TC1800000331.mm.1  | 0.0  | 0.612222 |
| TC1300000910.mm.1 | ENSMUST00000104060 | Gm23275 | predicted gene, 23275                           | 3395439   | 3395542   | TC0900000016.mm.1  | 0.1  | 0.612334 |
| TC1300000912.mm.1 | NR_037617          | St5     | suppression of tumorigenicity 5                 | 109523911 | 109617147 | TC0700004076.mm.1  | 0.1  | 0.612538 |
| TC1300000916.mm.1 | NM_001164823       | Tmem42  | transmembrane protein 42                        | 123021326 | 123023491 | TC0900001654.mm.1  | 0.0  | 0.612529 |
| TC1300000919.mm.1 | NM_001045526       | Scimp   | SLP adaptor and CSK interacting membrane prot   | 70790932  | 70812586  | TC1100003115.mm.1  | -0.1 | 0.612652 |
| TC1300000920.mm.1 | NM_153545          | Lrrc45  | leucine rich repeat containing 45               | 120713925 | 120721128 | TC1100002044.mm.1  | 0.0  | 0.612679 |
| TC1300000931.mm.1 | ENSMUST00000157873 | Gm24402 | predicted gene, 24402                           | 151260824 | 151260914 | TC0100003249.mm.1  | 0.1  | 0.612738 |
| TC1300000934.mm.1 | ENSMUST00000121321 | Rpl10-p | ribosomal protein L10, pseudogene 6             | 37295155  | 37295796  | TC1900001455.mm.1  | -0.1 | 0.612791 |
| TC1300000937.mm.1 | XR_002343          | Gm5067  | predicted gene 5067                             | 26006989  | 26070851  | TC0500000240.mm.1  | 0.0  | 0.61282  |
| TC1300000952.mm.1 | NM_028593          | Cybrd1  | cytochrome b reductase 1                        | 71117923  | 71142926  | TC0200001032.mm.1  | 0.0  | 0.613105 |
| TC1300000954.mm.1 | NM_008597          | Mgp     | matrix Gla protein                              | 136872435 | 136875805 | TC0600003335.mm.1  | 0.2  | 0.613519 |
| TC1300000956.mm.1 | ENSMUST00000049117 | Gm5830  | predicted pseudogene 5830                       | 78967637  | 78968079  | TC0100002639.mm.1  | 0.1  | 0.61367  |
| TC1300000961.mm.1 | ENSMUST00000103871 | Gm24541 | predicted gene, 24541                           | 79949187  | 79949282  | TC0700001140.mm.1  | -0.1 | 0.613874 |
| TC1300000965.mm.1 | NM_026267          | Necap1  | NECAP endocytosis associated 1                  | 122874474 | 122888942 | TC0600001394.mm.1  | 0.0  | 0.614007 |
| TC1300000967.mm.1 | ENSMUST00000104237 | Gm24280 | predicted gene, 24280                           | 104971427 | 104971560 | TC1400001197.mm.1  | -0.1 | 0.614009 |
| TC1300000969.mm.1 | ENSMUST00000112956 | Gm11111 | predicted gene 11111                            | 98552695  | 98553744  | TC0500000952.mm.1  | 0.1  | 0.614182 |
| TC1300000970.mm.1 | NM_001101647       | Prlh    | prolactin releasing hormone                     | 90953108  | 90954012  | TC0100000883.mm.1  | 0.0  | 0.614317 |
| TC1300000982.mm.1 | ENSMUST00000074759 | Tpt1-ps | tumor protein, translationally-controlled, pseu | 99877747  | 99878433  | TC06000002845.mm.1 | -0.1 | 0.614423 |
| TC1300000983.mm.1 | ENSMUST00000179548 | Gm25617 | predicted gene, 25617                           | 38158008  | 38158140  | TC1600000546.mm.1  | 0.2  | 0.614428 |
| TC1300000994.mm.1 | ENSMUST00000175581 | Gm24971 | predicted gene, 24971                           | 54666677  | 54666786  | TC1200001748.mm.1  | -0.1 | 0.614553 |
| TC1300000996.mm.1 | NM_008471          | Krt19   | keratin 19                                      | 100140810 | 100148665 | TC1100003758.mm.1  | 0.0  | 0.614562 |
| TC1300001013.mm.1 | NM_008683          | Neddd8  | neural precursor cell expressed, developmentall | 55662263  | 55671906  | TC1400002094.mm.1  | -0.1 | 0.614564 |
| TC1300001016.mm.1 | NM_009630          | Adora2a | adenosine A2a receptor                          | 75316943  | 75334788  | TC1000007111.mm.1  | 0.0  | 0.614591 |
| TC1300001017.mm.1 | NR_037304          | Mir3471 | microRNA 3471-1                                 | 23813938  | 24129968  | TC0500002062.mm.1  | 0.2  | 0.61476  |
| TC1300001018.mm.1 | ENSMUST00000158355 | Mir669m | microRNA 669m-2                                 | 10513434  | 10513531  | TC0200000195.mm.1  | -0.1 | 0.6148   |
| TC1300001028.mm.1 | ENSMUST00000104282 | Gm24789 | predicted gene, 24789                           | 39040579  | 39040709  | TC1500000299.mm.1  | 0.0  | 0.614885 |
| TC1300001029.mm.1 | NM_008586          | Mep1b   | meprin 1 beta                                   | 21072344  | 21100199  | TC1800000165.mm.1  | 0.2  | 0.614948 |
| TC1300001041.mm.1 | ENSMUST00000179470 | Gm21028 | predicted gene, 21028                           | 42578466  | 42578588  | TC0700002927.mm.1  | 0.1  | 0.614983 |
| TC1300001049.mm.1 | ENSMUST00000118752 | Gm6982  | predicted gene 6982                             | 92593809  | 92595368  | TC0X00000876.mm.1  | -0.1 | 0.615037 |
| TC1300001052.mm.1 | NM_053108          | Glrx    | glutaredoxin                                    | 75839868  | 75850151  | TC1300000919.mm.1  | 0.0  | 0.615086 |
| TC1300001054.mm.1 | NM_007792          | Csrp2   | cysteine and glycine-rich protein 2             | 110920176 | 110939599 | TC1000001284.mm.1  | 0.1  | 0.61523  |
| TC1300001061.mm.1 | NM_030248          | Cdk5rap | CDK5 regulatory subunit associated protein 3    | 96907426  | 96916496  | TC1100003627.mm.1  | 0.0  | 0.615337 |
| TC1300001064.mm.1 | NM_178628          | Atl1    | atlasin GTPase 1                                | 69893105  | 69969744  | TC1200000580.mm.1  | 0.0  | 0.615431 |
| TC1300001066.mm.1 | ENSMUST00000122740 | n-R5s18 | nuclear encoded rRNA 5S 18                      | 164133385 | 164133505 | TC0X00001662.mm.1  | -0.1 | 0.615736 |
| TC1300001069.mm.1 | NM_033321          | P2rx5   | purinergic receptor P2X, ligand-gated ion chann | 73160421  | 73172687  | TC1100001016.mm.1  | 0.0  | 0.615813 |
| TC1300001076.mm.1 | ENSMUST00000119007 | Gm14869 | predicted gene 14869                            | 109120801 | 109121684 | TC0X00002857.mm.1  | 0.0  | 0.615974 |
| TC1300001077.mm.1 | ENSMUST00000158603 | Gm25044 | predicted gene, 25044                           | 80476352  | 80476455  | TC1000000859.mm.1  | -0.1 | 0.616025 |
| TC1300001081.mm.1 | NR_033726          | Ces2d-p | carboxylesterase 2D, pseudogene                 | 104867424 | 104874082 | TC08000001195.mm.1 | 0.0  | 0.616055 |
| TC1300001084.mm.1 | XM_003084464       | Gm16340 | predicted gene 16340                            | 173775837 | 173802720 | TC0100003595.mm.1  | 0.1  | 0.616096 |
| TC1300001086.mm.1 | XM_001477592       | Gm20914 | predicted gene, 20914                           | 5727496   | 5728179   | TC0Y00000020.mm.1  | 0.0  | 0.61616  |
| TC1300001087.mm.1 | ENSMUST00000157183 | Gm23435 | predicted gene, 23435                           | 35243595  | 35243750  | TC0600000345.mm.1  | 0.1  | 0.616226 |
| TC1300001088.mm.1 | NM_018762          | Gp9     | glycoprotein 9 (molelet)                        | 87778136  | 87779762  | TC07000001016.mm.1 | 0.1  | 0.616443 |
| TC1300001100.mm.1 | ENSMUST00000185060 | HYMAI   | Hydatidiform mole associated and imprinted cor  | 13091581  | 13091817  | TC1000001764.mm.1  | 0.0  | 0.616473 |
| TC1300001102.mm.1 | NR_030720_2        | Gm21884 | predicted gene, 21884                           | 106322396 | 106330688 | TC0700004007.mm.1  | 0.1  | 0.616511 |
| TC1300001119.mm.1 | ENSMUST00000158252 | Gm25860 | predicted gene, 25860                           | 93147846  | 93147971  | TC0700003746.mm.1  | -0.1 | 0.616692 |
| TC1300001122.mm.1 | NR_035428          | Mir1196 | microRNA 1196                                   | 61752220  | 61752338  | TC1400002201.mm.1  | 0.1  | 0.616785 |
| TC1300001128.mm.1 | NM_025852          | Rexo1   | REX1, RNA exonuclease 1 homolog (S. cerevisiae  | 80540922  | 80561560  | TC1000002504.mm.1  | 0.0  | 0.616789 |
| TC1300001131.mm.1 | ENSMUST00000084675 | Mir669c | microRNA 669c                                   | 10509296  | 10509404  | TC0200000185.mm.1  | -0.1 | 0.616831 |
| TC1300001137.mm.1 | ENSMUST00000082612 | Gm24538 | predicted gene, 24538                           | 29481525  | 29481631  | TC05000002143.mm.1 | -0.1 | 0.616945 |
| TC1300001138.mm.1 | NM_019423          | Elovl2  | elongation of very long chain fatty acids (FEN1 | 41182382  | 41220405  | TC1300001859.mm.1  | 0.1  | 0.616972 |
| TC1300001139.mm.1 | ENSMUST00000082804 | Gm23054 | predicted gene, 23054                           | 88862919  | 88863080  | TC0300000739.mm.1  | 0.1  | 0.617111 |
| TC1300001140.mm.1 | NM_019866          | Spib    | Spi-B transcription factor (Spi-1/PU.1 related) | 44525995  | 44532071  | TC0700002967.mm.1  | -0.2 | 0.617131 |
| TC1300001155.mm.1 | ENSMUST00000104219 | Gm25422 | predicted gene, 25422                           | 105140207 | 105140335 | TC1000002793.mm.1  | 0.1  | 0.617353 |
| TC1300001159.mm.1 | NM_207568          | Olfr125 | olfactory receptor 1252                         | 89721103  | 89722206  | TC0200004070.mm.1  | -0.1 | 0.617555 |
| TC1300001160.mm.1 | NM_139222          | Defb15  | defensin beta 15                                | 21929799  | 21932710  | TC0800001857.mm.1  | 0.0  | 0.617883 |
| TC1300001161.mm.1 | ENSMUST00000083858 | Gm25515 | predicted gene, 25515                           | 4104313   | 4104469   | TC1000000019.mm.1  | -0.1 | 0.618237 |
| TC1300001165.mm.1 | NM_001190830       | Jak3    | Janus kinase 3                                  | 71676296  | 71690577  | TC0800000800.mm.1  | 0.0  | 0.618383 |
| TC1300001169.mm.1 | NM_010817          | Psmd7   | proteasome (prosome, macropain) 26S subunit,    | 107580380 | 107588482 | TC0800002881.mm.1  | -0.1 | 0.618517 |
| TC1300001173.mm.1 | NM_010908          | Nfkbib  | nuclear factor of kappa light polypeptide gene  | 28758251  | 28767512  | TC0700002705.mm.1  | -0.1 | 0.618538 |
| TC1300001182.mm.1 | NM_001170479       | Loh12cr | loss of heterozygosity, 12, chromosomal region  | 134639512 | 134711184 | TC0600001589.mm.1  | 0.0  | 0.618756 |

|                   |                    |         |                                                 |           |           |                    |      |          |
|-------------------|--------------------|---------|-------------------------------------------------|-----------|-----------|--------------------|------|----------|
| TC1300001190.mm.1 | ENSMUST00000179823 | Gm23966 | predicted gene, 23966                           | 58466515  | 58466621  | TC0100002384.mm.1  | -0.1 | 0.618915 |
| TC1300001204.mm.1 | ENSMUST00000104111 | Gm24126 | predicted gene, 24126                           | 76074546  | 76074651  | TC1700001175.mm.1  | 0.1  | 0.618952 |
| TC1300001205.mm.1 | ENSMUST00000103916 | Gm25263 | predicted gene, 25263                           | 10509885  | 10509984  | TC050000187.mm.1   | -0.1 | 0.619035 |
| TC1300001211.mm.1 | NM_026364          | Prpsap1 | phosphoribosyl pyrophosphate synthetase-assoc   | 116470816 | 116494202 | TC1100004118.mm.1  | 0.0  | 0.619059 |
| TC1300001242.mm.1 | ENSMUST00000120311 | Gm12266 | predicted gene, 12266                           | 60343245  | 60344206  | TC1100000750.mm.1  | 0.0  | 0.619151 |
| TC1300001249.mm.1 | ENSMUST00000122555 | Gm25323 | predicted gene, 25323                           | 126201175 | 126201277 | TC04000003532.mm.1 | 0.0  | 0.619676 |
| TC1300001251.mm.1 | NM_001081476       | Gm14725 | predicted gene, 14725                           | 70545558  | 70546385  | TC0X00000635.mm.1  | 0.1  | 0.619848 |
| TC1300001270.mm.1 | ENSMUST00000179973 | Gm21870 | predicted gene, 21870                           | 33985639  | 33986816  | TC0X00002032.mm.1  | 0.0  | 0.620001 |
| TC1300001273.mm.1 | ENSMUST00000118202 | Gm13914 | predicted gene, 13914                           | 108733212 | 108734202 | TC0200004295.mm.1  | 0.0  | 0.620098 |
| TC1300001280.mm.1 | NM_030113          | Arhgap1 | Rho GTPase activating protein 10                | 77250366  | 77517907  | TC0800002497.mm.1  | -0.1 | 0.620506 |
| TC1300001281.mm.1 | ENSMUST00000104428 | Gm25502 | predicted gene, 25502                           | 59070988  | 59071118  | TC0100000443.mm.1  | 0.1  | 0.620695 |
| TC1300001288.mm.1 | ENSMUST00000117665 | Gm12492 | predicted gene, 12492                           | 43798896  | 43800255  | TC0400002544.mm.1  | -0.1 | 0.620907 |
| TC1300001298.mm.1 | ENSMUST00000082683 | n-R5s17 | nuclear encoded rRNA 5S 176                     | 120064335 | 120064443 | TC0500001331.mm.1  | 0.3  | 0.621166 |
| TC1300001315.mm.1 | ENSMUST00000158797 | Gm26008 | predicted gene, 26008                           | 39265844  | 39265942  | TC0600002119.mm.1  | 0.1  | 0.621207 |
| TC1300001318.mm.1 | ENSMUST00000118792 | Gm12117 | predicted gene, 12117                           | 17820946  | 17821770  | TC1300000126.mm.1  | 0.1  | 0.621354 |
| TC1300001320.mm.1 | NM_001085507       | Zbtb34  | zinc finger and BTB domain containing 34        | 33406108  | 33431324  | TC0200003326.mm.1  | 0.0  | 0.621376 |
| TC1300001324.mm.1 | ENSMUST00000116861 | Gm22195 | predicted gene, 22195                           | 42711130  | 42712137  | TC0900001690.mm.1  | 0.1  | 0.621514 |
| TC1300001326.mm.1 | NM_001030014       | Mcat    | malonyl CoA:ACP acyltransferase (mitochondrial  | 83546797  | 83555711  | TC1500001978.mm.1  | 0.0  | 0.621606 |
| TC1300001340.mm.1 | ENSMUST00000082493 | Gm22748 | predicted gene, 22748                           | 17546146  | 17546281  | TC1200000143.mm.1  | -0.3 | 0.621914 |
| TC1300001349.mm.1 | ENSMUST00000122428 | Gm14629 | predicted gene, 14629                           | 57670344  | 57670487  | TC0X00002276.mm.1  | 0.1  | 0.622138 |
| TC1300001353.mm.1 | NM_007631          | Ccnd1   | cyclin D1                                       | 144929931 | 144939925 | TC0700004610.mm.1  | 0.0  | 0.622474 |
| TC1300001356.mm.1 | ENSMUST00000116845 | Gm26303 | predicted gene, 26303                           | 115381960 | 115382078 | TC0900001533.mm.1  | 0.1  | 0.622724 |
| TC1300001358.mm.1 | ENSMUST00000158080 | Gm25549 | predicted gene, 25549                           | 131073658 | 131073751 | TC0100003052.mm.1  | -0.1 | 0.622801 |
| TC1300001360.mm.1 | NM_175490          | Gpr75   | G protein-coupled receptor 75                   | 30885358  | 30893729  | TC1100000315.mm.1  | 0.0  | 0.622885 |
| TC1300001366.mm.1 | ENSMUST00000178841 | Gm23147 | predicted gene, 23147                           | 6338882   | 6338991   | TC0300001604.mm.1  | 0.0  | 0.622904 |
| TC1300001376.mm.1 | ENSMUST00000179354 | Gm23936 | predicted gene, 23936                           | 120837488 | 120837597 | TC0400001358.mm.1  | 0.0  | 0.622904 |
| TC1300001377.mm.1 | ENSMUST00000178287 | Gm24496 | predicted gene, 24496                           | 10290478  | 10290587  | TC0900001742.mm.1  | 0.0  | 0.622904 |
| TC1300001378.mm.1 | ENSMUST00000179931 | Gm25086 | predicted gene, 25086                           | 10295047  | 10295156  | TC0900001743.mm.1  | 0.0  | 0.622904 |
| TC1300001383.mm.1 | XM_001477326       | Gm14535 | predicted pseudogene, 14535                     | 13217909  | 13218655  | TC0X00001867.mm.1  | 0.0  | 0.622926 |
| TC1300001384.mm.1 | ENSMUST00000082690 | Gm22305 | predicted gene, 22305                           | 86671236  | 86671343  | TC0800002630.mm.1  | 0.0  | 0.623149 |
| TC1300001392.mm.1 | NM_013797          | Slco1a1 | solute carrier organic anion transporter family | 141907281 | 141946962 | TC0600003365.mm.1  | 0.1  | 0.623195 |
| TC1300001396.mm.1 | NM_178263          | Ankrd27 | ankyrin repeat domain 27 (VPS9 domain)          | 35586247  | 35639237  | TC0700000663.mm.1  | 0.1  | 0.623386 |
| TC1300001400.mm.1 | ENSMUST00000116916 | Gm26044 | predicted gene, 26044                           | 69752403  | 69752528  | TC0500002554.mm.1  | 0.0  | 0.623653 |
| TC1300001406.mm.1 | ENSMUST00000051687 | Gm1840  | predicted gene, 1840                            | 5639584   | 5640996   | TC0800000045.mm.1  | 0.1  | 0.623959 |
| TC1300001407.mm.1 | ENSMUST00000161387 | Gm9727  | predicted gene, 9727                            | 107478526 | 107479080 | TC0500002926.mm.1  | -0.1 | 0.624001 |
| TC1300001413.mm.1 | NR_030434          | Mir763  | microRNA 763                                    | 120447991 | 120448110 | TC1000003026.mm.1  | 0.0  | 0.624008 |
| TC1300001414.mm.1 | NR_030434          | Mir763  | microRNA 763                                    | 0         | 0         | TSUnmapped0000013  | 0.0  | 0.624008 |
| TC1300001416.mm.1 | NM_052973          | Strn3   | striatin, calmodulin binding protein 3          | 51608541  | 51691914  | TC1200001715.mm.1  | -0.1 | 0.624016 |
| TC1300001417.mm.1 | NM_008430          | Kcnk1   | potassium channel, subfamily K, member 1        | 125995102 | 126030688 | TC0800001572.mm.1  | 0.0  | 0.624377 |
| TC1300001419.mm.1 | NM_001163688       | Ptpa    | protein tyrosine phosphatase, receptor type, A  | 130450278 | 130554300 | TC0200001985.mm.1  | 0.1  | 0.624811 |
| TC1300001428.mm.1 | NM_178608          | Reep1   | receptor accessory protein 1                    | 71075561  | 71810710  | TC0600000834.mm.1  | 0.0  | 0.624825 |
| TC1300001435.mm.1 | ENSMUST00000183951 | RP23-44 | N/A                                             | 33931644  | 33931875  | TC0900000309.mm.1  | 0.1  | 0.62536  |
| TC1300001445.mm.1 | ENSMUST00000061241 | Apoo    | apolipoprotein O                                | 107413865 | 107414767 | TC1300002624.mm.1  | -0.1 | 0.626127 |
| TC1300001446.mm.1 | NM_010717          | Limk1   | LIM-domain containing, protein kinase           | 134656039 | 134688590 | TC0500003378.mm.1  | 0.0  | 0.626132 |
| TC1300001447.mm.1 | NM_133826          | Atp6v1h | ATPase, H+ transporting, lysosomal V1 subunit H | 5083172   | 5162549   | TC0100000014.mm.1  | 0.1  | 0.626333 |
| TC1300001451.mm.1 | NR_038088          | Bcl1    | brain cytoplasmic RNA 1                         | 79697305  | 80369637  | TC1000002475.mm.1  | 0.0  | 0.626432 |
| TC1300001457.mm.1 | ENSMUST00000158606 | Gm23112 | predicted gene, 23112                           | 14267315  | 14267439  | TC0300001663.mm.1  | 0.0  | 0.626525 |
| TC1300001480.mm.1 | NR_030704          | Snord55 | small nucleolar RNA, C/D box 55                 | 117155770 | 117155848 | TC0400003364.mm.1  | -0.3 | 0.626818 |
| TC1300001492.mm.1 | NM_133980          | Slc22a1 | solute carrier family 22 (organic cation transp | 119192974 | 119209105 | TC0900003236.mm.1  | 0.1  | 0.627037 |
| TC1300001507.mm.1 | NM_029613          | Krtap4- | keratin associated protein 4-7                  | 99643106  | 99644089  | TC1100003725.mm.1  | 0.1  | 0.627127 |
| TC1300001508.mm.1 | ENSMUST00000184224 | CR97445 | N/A                                             | 35868302  | 35868397  | TC1700001984.mm.1  | 0.0  | 0.627573 |
| TC1300001510.mm.1 | NM_179203          | Atad3a  | ATPase family, AAA domain containing 3A         | 155740640 | 155761098 | TC0400004151.mm.1  | 0.0  | 0.627673 |
| TC1300001519.mm.1 | NM_009258          | SpinK3  | serine peptidase inhibitor, Kazal type 3        | 43728069  | 43737237  | TC1800001274.mm.1  | 0.2  | 0.628125 |
| TC1300001520.mm.1 | NM_030004          | Cryl1   | crystallin, lambda 1                            | 57275034  | 57398500  | TC1400002142.mm.1  | 0.1  | 0.628463 |
| TC1300001525.mm.1 | XM_984338          | Gm11787 | predicted gene, 11787                           | 3425651   | 3516515   | TC0400002119.mm.1  | 0.2  | 0.628748 |
| TC1300001527.mm.1 | NM_001163575       | Parp10  | poly (ADP-ribose) polymerase family, member 10  | 76232791  | 76243441  | TC0500002347.mm.1  | 0.0  | 0.629055 |
| TC1300001529.mm.1 | ENSMUST00000184078 | ACO2591 | N/A                                             | 78525989  | 78526110  | TC1000000788.mm.1  | 0.0  | 0.629124 |
| TC1300001543.mm.1 | NR_033117          | Gm3020  | predicted gene, 3020                            | 3412614   | 3433857   | TC1400002784.mm.1  | 0.0  | 0.629321 |
| TC1300001545.mm.1 | NM_001166632       | Havcr1  | hepatitis A virus cellular receptor 1           | 46735080  | 46779578  | TC1100000483.mm.1  | -0.1 | 0.629373 |
| TC1300001553.mm.1 | ENSMUST00000158386 | Gm24879 | predicted gene, 24879                           | 31747200  | 31747342  | TC1600001489.mm.1  | -0.1 | 0.629507 |
| TC1300001555.mm.1 | ENSMUST00000121106 | Gm15432 | predicted gene, 15432                           | 29564014  | 29564208  | TC0X00002007.mm.1  | 0.1  | 0.629579 |
| TC1300001557.mm.1 | ENSMUST00000157348 | Gm23716 | predicted gene, 23716                           | 85420137  | 85420280  | TC0200001238.mm.1  | -0.1 | 0.629594 |
| TC1300001558.mm.1 | ENSMUST00000118388 | Gm14270 | predicted gene, 14270                           | 170285035 | 170285880 | TC0200002640.mm.1  | -0.1 | 0.630281 |
| TC1300001560.mm.1 | NM_011584          | Nr1d2   | nuclear receptor subfamily 1, group D, member 2 | 18204054  | 18239127  | TC1400001499.mm.1  | 0.1  | 0.6306   |
| TC1300001561.mm.1 | ENSMUST00000104391 | Gm24891 | predicted gene, 24891                           | 87528030  | 87528165  | TC1600001987.mm.1  | 0.1  | 0.63078  |
| TC1300001562.mm.1 | NM_001160215       | Fcrla   | Fc receptor-like A                              | 170917576 | 170927583 | TC0100003520.mm.1  | -0.2 | 0.631059 |
| TC1300001563.mm.1 | NM_146619          | Olfr303 | olfactory receptor 303                          | 86394496  | 86395535  | TC0700003695.mm.1  | 0.0  | 0.631069 |
| TC1300001568.mm.1 | NR_106197          | Mir8117 | microRNA mir-8117 (Mir8117), microRNA.          | 0         | 0         | TSUnmapped0000010  | 0.1  | 0.631114 |
| TC1300001570.mm.1 | NM_134125          | Trip10  | thyroid hormone receptor interactor 10          | 57249451  | 57263697  | TC1700001032.mm.1  | 0.0  | 0.631209 |
| TC1300001574.mm.1 | ENSMUST00000177701 | Gm25525 | predicted gene, 25525                           | 138378591 | 138378697 | TC0500001655.mm.1  | -0.1 | 0.631595 |
| TC1300001575.mm.1 | ENSMUST00000157092 | Gm25824 | predicted gene, 25824                           | 79553557  | 79553677  | TC1800001648.mm.1  | 0.0  | 0.631772 |
| TC1300001576.mm.1 | NCBI_Gene:544896:p | Ighv5-9 | immunoglobulin heavy variable 5-9               | 113661769 | 113662228 | TC1200002560.mm.1  | 0.2  | 0.631819 |
| TC1300001583.mm.1 | NM_021710          | Ap4s1   | adaptor-related protein complex AP-4, sigma 1   | 51690966  | 51738939  | TC1200000419.mm.1  | 0.0  | 0.631907 |
| TC1300001587.mm.1 | NM_001007571       | D8Ert7  | DNA segment, Chr 8, ERATO Doi 738, expressed    | 84246226  | 84249761  | TC0800002578.mm.1  | -0.1 | 0.631994 |
| TC1300001588.mm.1 | NCBI_Gene:211331:p | Ighv1-5 | immunoglobulin heavy variable V1-54             | 115193675 | 115194108 | TC1200002631.mm.1  | -0.2 | 0.632063 |
| TC1300001598.mm.1 | NM_026933          | Triap1  | TP53 regulated inhibitor of apoptosis 1         | 115341225 | 115343569 | TC0500001257.mm.1  | 0.0  | 0.632138 |
| TC1300001602.mm.1 | ENSMUST00000082300 | Gm8399  | predicted gene, 8399                            | 81064684  | 81065803  | TC1300000961.mm.1  | 0.1  | 0.632153 |
| TC1300001603.mm.1 | ENSMUST00000158876 | Gm23479 | predicted gene, 23479                           | 98935894  | 98936015  | TC0700001377.mm.1  | 0.0  | 0.632382 |

|                   |                    |         |                                                 |           |           |                    |      |          |
|-------------------|--------------------|---------|-------------------------------------------------|-----------|-----------|--------------------|------|----------|
| TC1300001604.mm.1 | ENSMUST00000119600 | Gm13829 | predicted gene 13829                            | 115291763 | 115291900 | TC0500003094.mm.1  | 0.0  | 0.63252  |
| TC1300001609.mm.1 | NM_177337          | Arl11   | ADP-ribosylation factor-like 11                 | 61309753  | 61311936  | TC1400000862.mm.1  | 0.0  | 0.632682 |
| TC1300001615.mm.1 | NR_001585          | Speer7- | spermatogenesis associated glutamate (E)-rich p | 15536013  | 15714596  | TC0500000108.mm.1  | 0.0  | 0.632729 |
| TC1300001630.mm.1 | NM_028873          | Dnajc14 | Dnaj (Hsp40) homolog, subfamily C, member 14    | 128805580 | 128819446 | TC1000001622.mm.1  | 0.0  | 0.632774 |
| TC1300001631.mm.1 | ENSMUST00000083703 | Gm26397 | predicted gene, 26397                           | 126944847 | 126944980 | TC0800003201.mm.1  | -0.1 | 0.633073 |
| TC1300001633.mm.1 | ENSMUST00000183890 | ST7-OT3 | ST7 overlapping transcript 3 conserved region 3 | 17907172  | 17907291  | TC0600000141.mm.1  | 0.0  | 0.633253 |
| TC1300001634.mm.1 | XM_894313          | Gm6747  | predicted gene 6747                             | 41525264  | 41526311  | TC1900000588.mm.1  | -0.1 | 0.633336 |
| TC1300001635.mm.1 | ENSMUST00000183246 | Gm2193  | predicted gene 2193                             | 41608668  | 41609669  | TC0800002122.mm.1  | 0.1  | 0.633338 |
| TC1300001638.mm.1 | XR_141178          | Gm3609  | predicted gene 3609                             | 62402700  | 62411725  | TC1300002162.mm.1  | 0.0  | 0.63337  |
| TC1300001639.mm.1 | ENSMUST00000174977 | Gm22860 | predicted gene, 22860                           | 108567310 | 108567383 | TC0300002747.mm.1  | 0.1  | 0.6335   |
| TC1300001640.mm.1 | ENSMUST00000101960 | Gm24142 | predicted gene, 24142                           | 13490509  | 13490615  | TC1200001439.mm.1  | -0.1 | 0.633586 |
| TC1300001641.mm.1 | ENSMUST00000085949 | Gm17428 | predicted gene, 17428                           | 54976933  | 54977025  | TC1400000767.mm.1  | -0.2 | 0.63377  |
| TC1300001642.mm.1 | NR_102395          | Fgf18   | fibroblast growth factor 18                     | 33116978  | 33147400  | TC1100002484.mm.1  | 0.0  | 0.633866 |
| TC1300001643.mm.1 | ENSMUST00000120728 | Gm16177 | predicted gene 16177                            | 86659318  | 86660035  | TC0800002629.mm.1  | 0.1  | 0.633915 |
| TC1300001645.mm.1 | ENSMUST00000093657 | Gm25821 | predicted gene, 25821                           | 21287927  | 21288059  | TC1200000182.mm.1  | 0.0  | 0.634179 |
| TC1300001646.mm.1 | NM_010642          | Klk1b21 | kallikrein 1-related peptidase b21              | 44102292  | 44106583  | TC0700000789.mm.1  | 0.1  | 0.634347 |
| TC1300001652.mm.1 | NM_010318          | Gng5    | guanine nucleotide binding protein (G protein), | 146499834 | 146505572 | TC0300001493.mm.1  | 0.0  | 0.634428 |
| TC1300001666.mm.1 | ENSMUST00000181451 | Gm8941  | predicted gene 8941                             | 151136507 | 151137780 | TC0100001347.mm.1  | 0.0  | 0.634664 |
| TC1300001668.mm.1 | NM_001160136       | Gm20917 | predicted gene, 20917                           | 79148793  | 79149787  | TC0Y00000487.mm.1  | 0.1  | 0.635246 |
| TC1300001669.mm.1 | NM_001011769       | Olfr317 | olfactory receptor 317                          | 58732096  | 58733223  | TC1100002833.mm.1  | 0.0  | 0.635547 |
| TC1300001672.mm.1 | NM_009203          | Slc22a1 | solute carrier family 22 (organic anion/cation  | 6535845   | 6543070   | TC1900001012.mm.1  | 0.1  | 0.635593 |
| TC1300001725.mm.1 | NM_153529          | Nrn1    | neuritin 1                                      | 36725622  | 36734477  | TC1300001812.mm.1  | 0.0  | 0.635823 |
| TC1300001733.mm.1 | NM_001011753       | Olfr115 | olfactory receptor 115                          | 37609785  | 37627109  | TC1700002076.mm.1  | -0.1 | 0.6362   |
| TC1300001737.mm.1 | NR_029877          | Mir376a | microRNA 376a                                   | 109723781 | 109723848 | TC1200001185.mm.1  | 0.0  | 0.636401 |
| TC1300001739.mm.1 | NM_030684          | Trim34a | tripartite motif-containing 34A                 | 104244457 | 104340693 | TC0700001520.mm.1  | -0.1 | 0.636618 |
| TC1300001750.mm.1 | ENSMUST00000119726 | Gm7079  | predicted pseudogene 7079                       | 8047229   | 8047399   | TC0X00000080.mm.1  | -0.2 | 0.636628 |
| TC1300001752.mm.1 | NM_001034900       | Zfp345  | zinc finger protein 345                         | 150470991 | 150485091 | TC0200004839.mm.1  | 0.0  | 0.636931 |
| TC1300001764.mm.1 | ENSMUST00000175153 | Gm23813 | predicted gene, 23813                           | 49771833  | 49771909  | TC1100000524.mm.1  | 0.1  | 0.636972 |
| TC1300001765.mm.1 | ENSMUST00000175309 | Gm24814 | predicted gene, 24814                           | 8738321   | 8738390   | TC1600000096.mm.1  | 0.0  | 0.637245 |
| TC1300001768.mm.1 | NM_172725          | Ap5z1   | adaptor-related protein complex 5, zeta 1 subun | 142463931 | 142478715 | TC0500001716.mm.1  | 0.0  | 0.637281 |
| TC1300001770.mm.1 | NM_023320          | Plekho1 | pleckstrin homology domain containing, family C | 95988429  | 95996001  | TC0300002492.mm.1  | 0.0  | 0.637282 |
| TC1300001774.mm.1 | ENSMUST00000120456 | Gm14884 | predicted gene 14884                            | 20459490  | 20459685  | TC0X000001924.mm.1 | 0.0  | 0.638028 |
| TC1300001779.mm.1 | ENSMUST00000082844 | Gm25206 | predicted gene, 25206                           | 128084143 | 128084216 | TC1000001585.mm.1  | -0.2 | 0.638413 |
| TC1300001781.mm.1 | NM_001164048       | Mb      | myoglobin                                       | 77015487  | 77050670  | TC1500001798.mm.1  | 0.0  | 0.638422 |
| TC1300001792.mm.1 | NM_146916          | Olfr134 | olfactory receptor 1346                         | 6474088   | 6475153   | TC0700000082.mm.1  | 0.1  | 0.638475 |
| TC1300001793.mm.1 | ENSMUST00000179161 | Gm24196 | predicted gene, 24196                           | 8203866   | 8203975   | TC0500001928.mm.1  | -0.1 | 0.638915 |
| TC1300001806.mm.1 | NM_001127188       | Zfp534  | zinc finger protein 534                         | 147673502 | 147702631 | TC0400003995.mm.1  | 0.0  | 0.639047 |
| TC1300001807.mm.1 | ENSMUST00000104357 | Gm22018 | predicted gene, 22018                           | 68010340  | 68010470  | TC0800000698.mm.1  | 0.1  | 0.639163 |
| TC1300001812.mm.1 | NM_029494          | Rab30   | RAB30, member RAS oncogene family               | 92741603  | 92837117  | TC0700001317.mm.1  | 0.1  | 0.639209 |
| TC1300001814.mm.1 | ENSMUST00000116680 | Gm22468 | predicted gene, 22468                           | 137621474 | 137621593 | TC0300001393.mm.1  | 0.1  | 0.639264 |
| TC1300001831.mm.1 | NCBI_Gene:547427:p | Trav18  | T cell receptor alpha variable 18               | 53831105  | 53831827  | TC1400000710.mm.1  | 0.0  | 0.639339 |
| TC1300001836.mm.1 | NM_010321          | Gnmt    | glycine N-methyltransferase                     | 46725664  | 46729168  | TC1700002187.mm.1  | 0.0  | 0.639576 |
| TC1300001837.mm.1 | NM_011731          | Slc6a20 | solute carrier family 6 (neurotransmitter trans | 123593820 | 123632565 | TC0900003306.mm.1  | 0.1  | 0.639645 |
| TC1300001859.mm.1 | ENSMUST00000082508 | Gm26225 | predicted gene, 26225                           | 64753918  | 64754052  | TC1400000926.mm.1  | -0.1 | 0.639667 |
| TC1300001861.mm.1 | ENSMUST00000122034 | Gm12438 | predicted gene 12438                            | 48745515  | 48745850  | TC0400002630.mm.1  | 0.0  | 0.639667 |
| TC1300001866.mm.1 | ENSMUST00000117258 | Gm7781  | predicted gene 7781                             | 130524637 | 130525424 | TC0X000001262.mm.1 | 0.0  | 0.639767 |
| TC1300001868.mm.1 | ENSMUST00000178005 | Gm23567 | predicted gene, 23567                           | 72969602  | 72969708  | TC0900000984.mm.1  | 0.0  | 0.639826 |
| TC1300001877.mm.1 | NM_001033383       | Zfp865  | zinc finger protein 865                         | 5020376   | 5033223   | TC0700000052.mm.1  | 0.0  | 0.639894 |
| TC1300001882.mm.1 | NM_178875          | Zfp935  | zinc finger protein 935                         | 62453016  | 62466812  | TC1300002767.mm.1  | -0.1 | 0.639988 |
| TC1300001883.mm.1 | NM_001112738       | Atp5c1  | ATP synthase, H+ transporting, mitochondrial F1 | 10056016  | 10080510  | TC0200002942.mm.1  | 0.1  | 0.640242 |
| TC1300001886.mm.1 | ENSMUST00000104036 | Gm23437 | predicted gene, 23437                           | 106766030 | 106766156 | TC1400001226.mm.1  | 0.1  | 0.640369 |
| TC1300001902.mm.1 | ENSMUST00000120886 | Gm13882 | predicted gene 13882                            | 104291574 | 104292575 | TC0200001556.mm.1  | 0.1  | 0.640442 |
| TC1300001906.mm.1 | ENSMUST00000181525 | Gm5706  | predicted gene 5706                             | 182392543 | 182393535 | TC0100003713.mm.1  | 0.0  | 0.64066  |
| TC1300001907.mm.1 | NR_039558          | Mir5099 | microRNA 5099                                   | 36816205  | 36816278  | TC1200000328.mm.1  | 0.0  | 0.640743 |
| TC1300001910.mm.1 | NR_039558          | Mir5099 | microRNA 5099                                   | 0         | 0         | TSUnmapped0000010  | 0.0  | 0.640743 |
| TC1300001922.mm.1 | ENSMUST00000121267 | Gm12155 | predicted gene 12155                            | 44387115  | 44387274  | TC1100002578.mm.1  | 0.0  | 0.640763 |
| TC1300001923.mm.1 | NR_029655          | Mir34b  | microRNA 34b                                    | 51103562  | 51103645  | TC0900002286.mm.1  | 0.1  | 0.640785 |
| TC1300001928.mm.1 | ENSMUST00000161109 | Gm15790 | predicted pseudogene 15790                      | 129796608 | 129797858 | TC0100003032.mm.1  | -0.1 | 0.640801 |
| TC1300001942.mm.1 | ENSMUST00000104000 | Gm25090 | predicted gene, 25090                           | 159139361 | 159139492 | TC0200002445.mm.1  | 0.1  | 0.640841 |
| TC1300001943.mm.1 | ENSMUST00000183723 | RP24-10 | N/A                                             | 15408520  | 15408864  | TC07000002406.mm.1 | 0.0  | 0.640861 |
| TC1300001945.mm.1 | NM_138746          | Fam50b  | family with sequence similarity 50, member B    | 34734850  | 34747622  | TC1300000395.mm.1  | 0.0  | 0.640976 |
| TC1300001946.mm.1 | NM_008181          | Gsta1   | glutathione S-transferase, alpha 1 (Ya)         | 78230656  | 78269166  | TC0900001049.mm.1  | 0.1  | 0.640989 |
| TC1300001947.mm.1 | ENSMUST00000137737 | Gm7855  | predicted gene 7855                             | 134625058 | 134625744 | TC0X00002996.mm.1  | -0.1 | 0.641182 |
| TC1300001949.mm.1 | ENSMUST00000158775 | Gm23050 | predicted gene, 23050                           | 13120531  | 13120695  | TC1700001466.mm.1  | 0.0  | 0.641572 |
| TC1300001954.mm.1 | NM_008950          | Psmc5   | protease (prosome, macropain) 26S subunit, ATF  | 106256154 | 106263120 | TC1100001777.mm.1  | -0.1 | 0.641598 |
| TC1300001965.mm.1 | NM_148944          | Chrn4   | cholinergic receptor, nicotinic, beta polypepti | 55028156  | 55048544  | TC0900002328.mm.1  | 0.0  | 0.641837 |
| TC1300001966.mm.1 | XR_106397          | Gm9796  | predicted gene 9796                             | 95696894  | 95699143  | TC1100003596.mm.1  | 0.0  | 0.64217  |
| TC1300001968.mm.1 | NR_037281          | Mir3098 | microRNA 3098                                   | 125195792 | 125195878 | TC0600001451.mm.1  | 0.1  | 0.64237  |
| TC1300001970.mm.1 | XM_003688808       | Gm21680 | predicted gene, 21680                           | 25968057  | 25972588  | TC0500002117.mm.1  | 0.0  | 0.642631 |
| TC1300001971.mm.1 | ENSMUST00000157418 | Gm23328 | predicted gene, 23328                           | 67420031  | 67420162  | TC0200000968.mm.1  | 0.0  | 0.64269  |
| TC1300002006.mm.1 | ENSMUST00000158814 | Gm23195 | predicted gene, 23195                           | 90815197  | 90815325  | TC1200000937.mm.1  | 0.1  | 0.642831 |
| TC1300002017.mm.1 | ENSMUST00000158425 | Gm23353 | predicted gene, 23353                           | 27452289  | 27452360  | TC1000000243.mm.1  | 0.0  | 0.642916 |
| TC1300002031.mm.1 | ENSMUST00000183861 | TTC28-A | TTC28 antisense RNA 1 conserved region 4        | 111274984 | 111275094 | TC0500003004.mm.1  | 0.0  | 0.643023 |
| TC1300002034.mm.1 | ENSMUST00000177881 | Gm5866  | predicted gene 5866                             | 52582320  | 52583227  | TC0500000531.mm.1  | 0.1  | 0.643122 |
| TC1300002036.mm.1 | ENSMUST00000172591 | Gm20492 | predicted gene 20492                            | 127289514 | 127289681 | TC1000001556.mm.1  | 0.0  | 0.643289 |
| TC1300002037.mm.1 | NM_026010          | Lipt2   | lipoyl(octanoyl) transferase 2 (putative)       | 100159277 | 100161365 | TC0700001400.mm.1  | 0.0  | 0.643463 |
| TC1300002040.mm.1 | NM_025443          | Pno1    | partner of NOB1 homolog (S. cerevisiae)         | 17203198  | 17211589  | TC1100002251.mm.1  | 0.1  | 0.643551 |
| TC1300002049.mm.1 | ENSMUST00000099988 | Gm10819 | predicted gene 10819                            | 16267061  | 16267621  | TC1900001207.mm.1  | -0.1 | 0.643697 |

|                   |                     |          |                                                  |           |           |                   |      |          |
|-------------------|---------------------|----------|--------------------------------------------------|-----------|-----------|-------------------|------|----------|
| TC1300002052.mm.1 | ENSMUST00000116686  | Gm25111  | predicted gene, 25111                            | 36699397  | 36699543  | TC0600000353.mm.1 | -0.1 | 0.643794 |
| TC1300002062.mm.1 | NM_008180           | Gss      | glutathione synthetase                           | 155563181 | 155592810 | TC0200004965.mm.1 | 0.0  | 0.643835 |
| TC1300002063.mm.1 | NM_145548           | Cyp2j13  | cytochrome P450, family 2, subfamily j, polypep  | 96027534  | 96077546  | TC0400003085.mm.1 | 0.1  | 0.643996 |
| TC1300002079.mm.1 | NM_016801           | Stx1a    | synaptobrevin 1A (brain)                         | 135023482 | 135051100 | TC0500001573.mm.1 | 0.0  | 0.643998 |
| TC1300002090.mm.1 | ENSMUST00000157575  | Gm23753  | predicted gene, 23753                            | 126634539 | 126634687 | TC0200004541.mm.1 | 0.0  | 0.644086 |
| TC1300002096.mm.1 | NR_037207           | Mir1843  | microRNA Mir1843                                 | 80391613  | 80391751  | TC1200001997.mm.1 | 0.1  | 0.644123 |
| TC1300002098.mm.1 | NM_024174           | Mrps23   | mitochondrial ribosomal protein S23              | 88204388  | 88211507  | TC1100001369.mm.1 | 0.1  | 0.644256 |
| TC1300002100.mm.1 | BC125003            | EfnA3    | ephrin A3                                        | 89313899  | 89322965  | TC0300002346.mm.1 | 0.0  | 0.644333 |
| TC1300002121.mm.1 | NM_007746           | Map3k8   | mitogen-activated protein kinase kinase kinase   | 4331327   | 4353015   | TC1800000929.mm.1 | 0.0  | 0.644378 |
| TC1300002123.mm.1 | NM_001146022        | Wdfy4    | WD repeat and FYVE domain containing 4           | 32959547  | 33185508  | TC1400001709.mm.1 | -0.1 | 0.644378 |
| TC1300002136.mm.1 | NCBI_Gene:640046:p  | Ighv2-9  | immunoglobulin heavy variable 2-9                | 113879096 | 113879529 | TC1200002573.mm.1 | -0.2 | 0.644508 |
| TC1300002139.mm.1 | NM_001010835        | Taar7e   | trace amine-associated receptor 7E               | 24037548  | 24038762  | TC1000000203.mm.1 | 0.1  | 0.644546 |
| TC1300002140.mm.1 | ENSMUST00000184942  | adapt33  | Adaptive response 33 conserved region 2          | 100426736 | 100426804 | TC0500000977.mm.1 | -0.1 | 0.644562 |
| TC1300002141.mm.1 | NR_029808           | Mir224   | microRNA 224                                     | 72261031  | 72261112  | TC0X00002404.mm.1 | -0.1 | 0.644796 |
| TC1300002143.mm.1 | NR_029808           | Mir224   | microRNA 224                                     | 0         | 0         | TSUnmapped0000008 | -0.1 | 0.644796 |
| TC1300002154.mm.1 | ENSMUST00000116957  | Gm23839  | predicted gene, 23839                            | 21878784  | 21878892  | TC1000001846.mm.1 | 0.0  | 0.644846 |
| TC1300002157.mm.1 | ENSMUST0000053066   | LOC1010  | uncharacterized LOC101056603 // uncharacteri:    | 10319945  | 10320229  | TC1700001436.mm.1 | 0.0  | 0.644916 |
| TC1300002158.mm.1 | ENSMUST00000104512  | Gm24069  | predicted gene, 24069                            | 39461530  | 39461656  | TC1200000352.mm.1 | 0.1  | 0.645015 |
| TC1300002161.mm.1 | NR_110894           | Pld6     | phospholipase D family, member 6 (Pld6), transc  | 0         | 0         | TSUnmapped0000006 | 0.0  | 0.645017 |
| TC1300002162.mm.1 | NR_030147           | Mir463   | microRNA 463                                     | 66799223  | 66799297  | TC0X00002348.mm.1 | 0.0  | 0.645062 |
| TC1300002166.mm.1 | uc029yhh.1          | Mid1     | clone MEX2A-1 Mid1 mRNA, partial sequence.       | 90833347  | 90842916  | TC0Y00000224.mm.1 | -0.1 | 0.645119 |
| TC1300002167.mm.1 | NM_001163618        | Tars2    | threonyl-tRNA synthetase 2, mitochondrial (puta  | 95739974  | 95754977  | TC0300002483.mm.1 | 0.0  | 0.645168 |
| TC1300002168.mm.1 | NM_010056           | Dlx5     | distal-less homeobox 5                           | 6877801   | 6882085   | TC0600001834.mm.1 | 0.0  | 0.645415 |
| TC1300002169.mm.1 | ENSMUST00000182390  | Gm6216   | predicted gene 6216                              | 12655867  | 12656553  | TC0100000062.mm.1 | 0.0  | 0.645415 |
| TC1300002172.mm.1 | NM_177002           | Slc22a3  | solute carrier family 22, member 30              | 8335371   | 8405111   | TC1900001768.mm.1 | 0.1  | 0.645434 |
| TC1300002175.mm.1 | NM_001256055        | Eif3j2   | eukaryotic translation initiation factor 3, sub  | 43475418  | 43477836  | TC1800001270.mm.1 | -0.1 | 0.645728 |
| TC1300002176.mm.1 | ENSMUST00000103907  | Gm24342  | predicted gene, 24342                            | 10509584  | 10509687  | TC0200000186.mm.1 | 0.1  | 0.645882 |
| TC1300002183.mm.1 | ENSMUST00000120883  | Gm13989  | predicted gene 13989                             | 123273146 | 123273345 | TC0200001863.mm.1 | 0.1  | 0.646116 |
| TC1300002187.mm.1 | XM_003085302        | Gm15266  | predicted gene 15266                             | 152110432 | 152111461 | TC0X00003187.mm.1 | -0.1 | 0.646601 |
| TC1300002201.mm.1 | ENSMUST00000181479  | B230364  | ---                                              | 14758635  | 14760720  | TC1000001794.mm.1 | 0.0  | 0.646631 |
| TC1300002202.mm.1 | NR_029784           | Mir10a   | microRNA 10a                                     | 96316684  | 96321638  | TC1100001498.mm.1 | 0.0  | 0.646768 |
| TC1300002204.mm.1 | NM_017379           | Tuba8    | tubulin, alpha 8                                 | 121210734 | 121226854 | TC0600001368.mm.1 | 0.0  | 0.646905 |
| TC1300002222.mm.1 | ENSMUST00000175439  | Gm25690  | predicted gene, 25690                            | 141346164 | 141346240 | TC0400001786.mm.1 | 0.1  | 0.646938 |
| TC1300002226.mm.1 | NM_001122660        | Gm10639  | predicted gene 10639                             | 78289923  | 78305525  | TC0900001050.mm.1 | 0.1  | 0.647356 |
| TC1300002232.mm.1 | NM_183022           | Asic4    | acid-sensing (proton-gated) ion channel family   | 75450436  | 75474343  | TC0100000660.mm.1 | 0.0  | 0.647378 |
| TC1300002233.mm.1 | NM_134069           | Slc17a3  | solute carrier family 17 (sodium phosphate), me  | 23839434  | 23860714  | TC1300000266.mm.1 | 0.1  | 0.647562 |
| TC1300002234.mm.1 | ENSMUST00000075401  | Ppp1r2-  | protein phosphatase 1, regulatory (inhibitor) s  | 66805306  | 66805938  | TC0900002531.mm.1 | 0.1  | 0.647822 |
| TC1300002235.mm.1 | ENSMUST00000182730  | Gm5272   | predicted gene 5272                              | 6450607   | 6451588   | TC0300001606.mm.1 | 0.0  | 0.647923 |
| TC1300002236.mm.1 | ENSMUST00000127214  | Gm9428   | predicted gene 9428                              | 5276735   | 5278427   | TC0X00001747.mm.1 | 0.0  | 0.648358 |
| TC1300002239.mm.1 | NM_010175           | Fadd     | Fas (TNFRSF6)-associated via death domain        | 144577318 | 144582463 | TC0700004607.mm.1 | 0.0  | 0.648368 |
| TC1300002247.mm.1 | NR_028542           | Snord8   | small nucleolar RNA, C/D box 8                   | 52209785  | 52209894  | TC1400002028.mm.1 | -0.3 | 0.648383 |
| TC1300002252.mm.1 | NM_012051           | Etv3     | ets variant gene 3                               | 87525407  | 87540158  | TC0300000697.mm.1 | 0.0  | 0.648795 |
| TC1300002253.mm.1 | NR_035454           | Mir1933  | microRNA 1933                                    | 21344588  | 21344675  | TC1100002325.mm.1 | 0.0  | 0.648881 |
| TC1300002255.mm.1 | NM_011467           | Spr      | sepiapterin reductase                            | 85133678  | 85137766  | TC0600002605.mm.1 | 0.0  | 0.648993 |
| TC1300002259.mm.1 | NM_130892           | Rtn4ip1  | reticulin 4 interacting protein 1                | 43901807  | 43947863  | TC1000000409.mm.1 | 0.0  | 0.649002 |
| TC1300002260.mm.1 | NM_153067           | Mrpgra3  | MAS-related GPR, member A3                       | 47588950  | 47601372  | TC0700003059.mm.1 | 0.0  | 0.649167 |
| TC1300002261.mm.1 | NM_010645           | Klk1b1   | kallikrein 1-related peptidase b1                | 43966751  | 43971318  | TC0700000784.mm.1 | 0.1  | 0.649217 |
| TC1300002269.mm.1 | ENSMUST00000184989  | FTX_1    | FTX transcript, XIIST regulator conserved region | 103595938 | 103596008 | TC0X00001034.mm.1 | -0.1 | 0.649313 |
| TC1300002274.mm.1 | ENSMUST00000120160  | Gm9105   | predicted gene 9105                              | 109387478 | 109388875 | TC0700004074.mm.1 | 0.0  | 0.649617 |
| TC1300002283.mm.1 | ENSMUST00000175157  | Gm23806  | predicted gene, 23806                            | 159449277 | 159449385 | TC0X00001620.mm.1 | 0.1  | 0.649718 |
| TC1300002292.mm.1 | ENSMUST00000175207  | Gm23393  | predicted gene, 23393                            | 116394342 | 116394413 | TC0100002929.mm.1 | 0.1  | 0.649796 |
| TC1300002299.mm.1 | NR_033215           | 3000002  | glyceraldehyde-3-phosphate dehydrogenase pse     | 109827943 | 109832706 | TC0900003097.mm.1 | 0.0  | 0.649911 |
| TC1300002302.mm.1 | NM_027844           | Krtap5-  | keratin associated protein 5-2                   | 142174532 | 142176005 | TC0700004557.mm.1 | 0.0  | 0.650005 |
| TC1300002303.mm.1 | NM_001045525        | Cyb5d1   | cytochrome b5 domain containing 1                | 69391925  | 69395631  | TC1100003041.mm.1 | 0.1  | 0.650173 |
| TC1300002306.mm.1 | NM_010780           | Cma1     | chymase 1, mast cell                             | 55941451  | 55944661  | TC1400002108.mm.1 | 0.0  | 0.650319 |
| TC1300002307.mm.1 | NM_031375           | Ngrn     | neugrin, neurite outgrowth associated            | 80261215  | 80658799  | TC0700001149.mm.1 | 0.0  | 0.650673 |
| TC1300002308.mm.1 | NM_020560           | Mrps31   | mitochondrial ribosomal protein S31              | 22411340  | 22429665  | TC0800000276.mm.1 | 0.0  | 0.650906 |
| TC1300002310.mm.1 | XM_001477500        | Gm3650   | predicted gene 3650                              | 43445110  | 43475271  | TC1800000444.mm.1 | 0.0  | 0.651088 |
| TC1300002311.mm.1 | NM_007443           | Ambp     | alpha 1 microglobulin/bikunin                    | 63143275  | 63154799  | TC0400002796.mm.1 | 0.0  | 0.65109  |
| TC1300002316.mm.1 | ENSMUST00000165358  | Gm17622  | predicted gene, 17622                            | 96490733  | 96491120  | TC1300001088.mm.1 | -0.1 | 0.651174 |
| TC1300002321.mm.1 | ENSMUST00000182418  | Gm7069   | predicted gene 7069                              | 76293972  | 76294979  | TC0800000852.mm.1 | 0.0  | 0.65134  |
| TC1300002337.mm.1 | NM_001142411        | Zfp937   | zinc finger protein 937                          | 150218073 | 150244874 | TC0200002214.mm.1 | 0.0  | 0.651377 |
| TC1300002339.mm.1 | ENSMUST00000120922  | Gm15027  | predicted gene 15027                             | 13179443  | 13179580  | TC0X00000162.mm.1 | -0.1 | 0.651558 |
| TC1300002343.mm.1 | ENSMUST00000118324  | Gm14536  | predicted gene 14536                             | 13189538  | 13189675  | TC0X00000163.mm.1 | -0.1 | 0.651558 |
| TC1300002344.mm.1 | NM_146285           | Olfir801 | olfactory receptor 801                           | 129669561 | 12967051  | TC0700003185.mm.1 | -0.1 | 0.652076 |
| TC1300002345.mm.1 | NM_022983           | Lpar3    | lysophosphatidic acid receptor 3                 | 146220961 | 146286214 | TC0300001490.mm.1 | 0.0  | 0.652083 |
| TC1300002348.mm.1 | NM_030180           | Usp54    | ubiquitin specific peptidase 54                  | 20548912  | 20618354  | TC1400001544.mm.1 | 0.0  | 0.652173 |
| TC1300002375.mm.1 | ENSMUST00000082712  | Gm23300  | predicted gene, 23300                            | 38071929  | 38072053  | TC1900000544.mm.1 | -0.1 | 0.652188 |
| TC1300002377.mm.1 | ENSMUST000000057649 | Pam16    | presequence translocase-associated motor 16 h    | 43524102  | 43524617  | TC1000000401.mm.1 | -0.1 | 0.652278 |
| TC1300002378.mm.1 | NM_026855           | Arv1     | ARV1 homolog (yeast)                             | 124722139 | 124734123 | TC0800001547.mm.1 | 0.0  | 0.652597 |
| TC1300002383.mm.1 | NM_009328           | Tcf15    | transcription factor 15                          | 152143561 | 152149097 | TC0200002276.mm.1 | 0.0  | 0.652736 |
| TC1300002384.mm.1 | NM_001080944        | Atp8b4   | ATPase, class I, type 8B, member 4               | 126320973 | 126500674 | TC0200004537.mm.1 | 0.0  | 0.652843 |
| TC1300002390.mm.1 | NM_031257           | Plekha2  | pleckstrin homology domain-containing, family 4  | 25039144  | 25102194  | TC0800001903.mm.1 | -0.1 | 0.65294  |
| TC1300002391.mm.1 | XM_001476230        | Gm20885  | predicted gene, 20885                            | 63747922  | 63772561  | TC0Y00000173.mm.1 | 0.0  | 0.653004 |
| TC1300002398.mm.1 | NM_008026           | Fli1     | Friend leukemia integration 1                    | 32422204  | 32542861  | TC0900001987.mm.1 | -0.1 | 0.653025 |
| TC1300002410.mm.1 | ENSMUST00000104074  | n-R5s16  | nuclear encoded rRNA 5S 16S                      | 112234163 | 112234262 | TC0600002897.mm.1 | 0.1  | 0.653119 |
| TC1300002422.mm.1 | ENSMUST00000182279  | Gm4891   | predicted gene 4891                              | 80933677  | 80934588  | TC0800000895.mm.1 | -0.1 | 0.65323  |
| TC1300002436.mm.1 | ENSMUST00000158446  | Gm24499  | predicted gene, 24499                            | 69152274  | 69152377  | TC1200001858.mm.1 | 0.1  | 0.653914 |

|                   |                    |         |                                                 |           |           |                    |      |          |
|-------------------|--------------------|---------|-------------------------------------------------|-----------|-----------|--------------------|------|----------|
| TC1300002437.mm.1 | NM_001104531       | Cyp2d11 | cytochrome P450, family 2, subfamily d, polypep | 82389154  | 82394022  | TC1500001945.mm.1  | 0.0  | 0.654003 |
| TC1300002441.mm.1 | ENSMUST00000104247 | Gm22590 | predicted gene, 22590                           | 121011835 | 121011962 | TC0X00001186.mm.1  | 0.1  | 0.654221 |
| TC1300002457.mm.1 | ENSMUST00000182599 | Gm6967  | predicted gene, 6967                            | 46675273  | 46675279  | TC1900001613.mm.1  | 0.0  | 0.654463 |
| TC1300002462.mm.1 | NM_001017426       | Kdm6b   | KDM1 lysine (K)-specific demethylase 6B         | 69398508  | 69416194  | TC1100003043.mm.1  | -0.1 | 0.6547   |
| TC1300002464.mm.1 | ENSMUST00000083878 | Gm24696 | predicted gene, 24696                           | 61357871  | 61358004  | TC1500001609.mm.1  | 0.0  | 0.654765 |
| TC1300002471.mm.1 | ENSMUST00000082867 | Gm24035 | predicted gene, 24035                           | 118426493 | 118426599 | TC0800003017.mm.1  | 0.1  | 0.655013 |
| TC1300002477.mm.1 | NM_033604          | Rnf111  | ring finger 111                                 | 70425429  | 70503725  | TC0900002594.mm.1  | 0.0  | 0.655199 |
| TC1300002479.mm.1 | NM_001024712       | Gm3696  | predicted gene 3696                             | 7083025   | 7105457   | TC1400002849.mm.1  | 0.0  | 0.655203 |
| TC1300002481.mm.1 | NM_001146100       | Hk1     | hexokinase 1                                    | 62268855  | 62379908  | TC1000002256.mm.1  | 0.0  | 0.655252 |
| TC1300002486.mm.1 | NM_030150          | Dhx58   | DEXH (Asp-Glu-X-His) box polypeptide 58         | 100694884 | 100704271 | TC1100003779.mm.1  | 0.0  | 0.655305 |
| TC1300002491.mm.1 | NM_001290183       | Ddit3   | DNA-damage inducible transcript 3 (Ddit3), tran | 0         | 0         | TSUnmapped0000001  | 0.0  | 0.655401 |
| TC1300002499.mm.1 | ENSMUST00000120750 | Gm13801 | predicted gene 13801                            | 96133435  | 96133594  | TC0200001471.mm.1  | 0.1  | 0.655773 |
| TC1300002501.mm.1 | NM_018861          | Slc1a4  | solute carrier family 1 (glutamate/neutral amin | 20302180  | 20332713  | TC1100002301.mm.1  | 0.0  | 0.655965 |
| TC1300002503.mm.1 | ENSMUST00000121923 | Gm4908  | predicted gene 4908                             | 47471808  | 47472812  | TC0X00000420.mm.1  | -0.1 | 0.656037 |
| TC1300002505.mm.1 | NM_001252207       | Kcnj16  | potassium inwardly-rectifying channel, subfamil | 110968033 | 111027968 | TC1100001848.mm.1  | 0.1  | 0.656059 |
| TC1300002517.mm.1 | NM_023397          | Mdp1    | magnesium-dependent phosphatase 1               | 55657879  | 55660508  | TC1400002093.mm.1  | 0.0  | 0.656063 |
| TC1300002524.mm.1 | NCBI_Gene:10004237 | Trav2   | T cell receptor alpha variable 2                | 52567198  | 52568053  | TC1400000615.mm.1  | 0.0  | 0.656079 |
| TC1300002525.mm.1 | ENSMUST00000083740 | Gm24259 | predicted gene, 24259                           | 108738752 | 108738858 | TC0900003068.mm.1  | -0.1 | 0.656166 |
| TC1300002526.mm.1 | NM_018867          | Cpxm2   | carboxypeptidase X 2 (M14 family)               | 132042810 | 132154741 | TC0700004403.mm.1  | 0.0  | 0.656297 |
| TC1300002530.mm.1 | ENSMUST00000104295 | Gm25273 | predicted gene, 25273                           | 37172880  | 37172994  | TC0900002043.mm.1  | -0.1 | 0.656882 |
| TC1300002531.mm.1 | NM_001254761       | Rnf128  | ring finger protein 128                         | 139563316 | 139673145 | TC0X00001371.mm.1  | 0.1  | 0.65714  |
| TC1300002532.mm.1 | NM_019568          | Cxcl14  | chemokine (C-X-C motif) ligand 14               | 56288643  | 56296551  | TC1300002079.mm.1  | 0.0  | 0.657168 |
| TC1300002536.mm.1 | ENSMUST00000172263 | Gm1848  | predicted gene 1848                             | 21146806  | 21147640  | TC0X00000224.mm.1  | 0.1  | 0.657175 |
| TC1300002545.mm.1 | NM_010006          | Cyp2d9  | cytochrome P450, family 2, subfamily d, polypep | 82452377  | 82456827  | TC1500000757.mm.1  | 0.0  | 0.657316 |
| TC1300002547.mm.1 | NM_134183          | Vmn1r21 | vomeronasal 1 receptor 21                       | 57843464  | 57844498  | TC0600002355.mm.1  | 0.1  | 0.657353 |
| TC1300002553.mm.1 | ENSMUST00000082688 | Gm22304 | predicted gene, 22304                           | 53639977  | 53640105  | TC0900000645.mm.1  | 0.1  | 0.657366 |
| TC1300002574.mm.1 | NM_029580          | Trmt5   | TRM5 tRNA methyltransferase 5                   | 73280011  | 73286711  | TC1200001916.mm.1  | -0.1 | 0.657379 |
| TC1300002611.mm.1 | ENSMUST00000101990 | n-R5s10 | nuclear encoded rRNA 5S 102                     | 123542178 | 123542296 | TC0800003106.mm.1  | 0.2  | 0.657483 |
| TC1300002616.mm.1 | NR_037257          | Mir669p | microRNA 669p-1                                 | 10489116  | 10489202  | TC0200000139.mm.1  | 0.0  | 0.657754 |
| TC1300002617.mm.1 | NR_037262          | Mir669p | microRNA 669p-2                                 | 10496497  | 10496583  | TC0200000157.mm.1  | 0.0  | 0.657754 |
| TC1300002620.mm.1 | XR_002345          | Gm5861  | predicted gene 5861                             | 11182060  | 11187810  | TC0500000070.mm.1  | 0.0  | 0.657793 |
| TC1300002624.mm.1 | XM_003689131       | Gm21287 | predicted gene, 21287                           | 88804770  | 88805474  | TC0Y00000544.mm.1  | 0.0  | 0.657799 |
| TC1300002630.mm.1 | NM_027344          | Ctsll3  | cathepsin L-like 3                              | 60798250  | 60802844  | TC1300002139.mm.1  | 0.0  | 0.658021 |
| TC1300002654.mm.1 | NM_010616          | Kif12   | kinesin family member 12                        | 63165634  | 63172131  | TC0400002797.mm.1  | 0.0  | 0.658055 |
| TC1300002658.mm.1 | ENSMUST00000179654 | Gm21726 | predicted gene, 21726                           | 90583400  | 90583765  | TC1300001016.mm.1  | 0.0  | 0.658176 |
| TC1300002665.mm.1 | NM_178595          | Pthr1   | peptidyl-tRNA hydrolase 1 homolog (S. cerevisia | 32775786  | 32790171  | TC0200000593.mm.1  | 0.0  | 0.658211 |
| TC1300002669.mm.1 | ENSMUST00000109588 | Gm12033 | predicted gene 12033                            | 20334834  | 20336086  | TC1100002303.mm.1  | 0.1  | 0.658226 |
| TC1300002686.mm.1 | ENSMUST00000158345 | Gm23763 | predicted gene, 23763                           | 136990211 | 136990270 | TC0100003157.mm.1  | 0.0  | 0.658356 |
| TC1300002689.mm.1 | NM_011319          | Sars    | seryl-aminoacyl-tRNA synthetase                 | 108424864 | 108445259 | TC0300002742.mm.1  | -0.1 | 0.658367 |
| TC1300002691.mm.1 | NM_001166750       | Vmn1r14 | vomeronasal 1 receptor 143                      | 22189377  | 22190300  | TC0700000338.mm.1  | 0.0  | 0.658459 |
| TC1300002711.mm.1 | NM_010213          | Fhl3    | four and a half LIM domains 3                   | 124700699 | 124708611 | TC0400001419.mm.1  | 0.0  | 0.65853  |
| TC1300002715.mm.1 | XM_001477777       | Gm3250  | predicted gene 3250                             | 77781850  | 77782542  | TC1000002430.mm.1  | 0.0  | 0.658703 |
| TC1300002717.mm.1 | NM_201355          | Nat14   | N-acetyltransferase 14                          | 4922251   | 4925006   | TC0700000049.mm.1  | 0.0  | 0.658743 |
| TC1300002748.mm.1 | NR_030405          | Mir302d | microRNA 302d                                   | 127545624 | 127545689 | TC0300001287.mm.1  | 0.0  | 0.658806 |
| TC1300002751.mm.1 | ENSMUST00000104540 | Gm22899 | predicted gene, 22899                           | 37995105  | 37995235  | TC0300001882.mm.1  | 0.1  | 0.659217 |
| TC1300002754.mm.1 | ENSMUST00000157509 | Gm22310 | predicted gene, 22310                           | 142786896 | 142787011 | TC0200002124.mm.1  | 0.1  | 0.659219 |
| TC1300002756.mm.1 | NM_001099301       | Obp2b   | odorant binding protein 2B                      | 25737009  | 25740097  | TC0200000433.mm.1  | 0.0  | 0.659371 |
| TC1300002757.mm.1 | NM_009116          | Prrx2   | paired related homeobox 2                       | 30834972  | 30881255  | TC0200000543.mm.1  | 0.0  | 0.659606 |
| TC1300002760.mm.1 | ENSMUST00000163566 | Gm6401  | predicted gene 6401                             | 41962708  | 41967927  | TC1400001812.mm.1  | 0.0  | 0.660154 |
| TC1300002761.mm.1 | NM_027215          | Tmem147 | transmembrane protein 147                       | 30727701  | 30729534  | TC0700002775.mm.1  | 0.1  | 0.660185 |
| TC1300002762.mm.1 | NR_102704          | Gm6083  | developmental pluripotency associated 5 pseud   | 29537949  | 29538624  | TC0500000273.mm.1  | 0.0  | 0.660204 |
| TC1300002767.mm.1 | ENSMUST00000082619 | Gm24622 | predicted gene, 24622                           | 106587481 | 106587642 | TC0X00002835.mm.1  | -0.1 | 0.660295 |
| TC1300002772.mm.1 | XM_001471962       | Gm1988  | predicted gene 1988                             | 39170500  | 39179653  | TC0700002887.mm.1  | 0.0  | 0.660298 |
| TC1300002773.mm.1 | NM_010131          | Emx1    | empty spiracles homeobox 1                      | 85187438  | 85429184  | TC0600000958.mm.1  | 0.0  | 0.660317 |
| TC1300002774.mm.1 | ENSMUST00000158041 | Gm25329 | predicted gene, 25329                           | 73763710  | 73763835  | TC0100000619.mm.1  | 0.0  | 0.660345 |
| TC1300002775.mm.1 | NM_001036293       | Nrbf2   | nuclear receptor binding factor 2               | 67266689  | 67285305  | TC1000002308.mm.1  | 0.0  | 0.6604   |
| TC1300002776.mm.1 | NM_021460          | Lipa    | lysosomal acid lipase A                         | 34492316  | 34527474  | TC1900001419.mm.1  | -0.1 | 0.660456 |
| TC1400000001.mm.1 | ENSMUST00000116981 | Gm25507 | predicted gene, 25507                           | 24679568  | 24679711  | TC1100002388.mm.1  | 0.1  | 0.660474 |
| TC1400000004.mm.1 | ENSMUST00000082552 | Gm23293 | predicted gene, 23293                           | 79595165  | 79595268  | TC1100001184.mm.1  | -0.1 | 0.660539 |
| TC1400000006.mm.1 | NM_011748          | Zfp14   | zinc finger protein 14                          | 30036359  | 30051396  | TC0700002740.mm.1  | 0.0  | 0.660637 |
| TC1400000007.mm.1 | ENSMUST00000158684 | Gm24838 | predicted gene, 24838                           | 77146351  | 77146480  | TC0800002495.mm.1  | -0.1 | 0.660652 |
| TC1400000011.mm.1 | NR_037293          | Mir3107 | microRNA 3107                                   | 23142573  | 23142662  | TC0800001881.mm.1  | 0.0  | 0.660854 |
| TC1400000012.mm.1 | ENSMUST00000158114 | Gm23891 | predicted gene, 23891                           | 47200627  | 47200764  | TC0300000342.mm.1  | 0.0  | 0.660902 |
| TC1400000014.mm.1 | NM_001199046       | Tubd1   | tubulin, delta 1                                | 86544991  | 86567360  | TC1100001317.mm.1  | 0.0  | 0.660984 |
| TC1400000015.mm.1 | NM_028238          | Rab38   | RAB38, member of RAS oncogene family            | 88430273  | 88491572  | TC0700001262.mm.1  | 0.1  | 0.661143 |
| TC1400000018.mm.1 | ENSMUST00000117949 | Gm13600 | predicted gene 13600                            | 66863262  | 66864775  | TC0200000963.mm.1  | 0.0  | 0.661217 |
| TC1400000020.mm.1 | ENSMUST00000083173 | n-R5s88 | nuclear encoded rRNA 5S 88                      | 102127888 | 102128005 | TC0900001281.mm.1  | -0.3 | 0.66123  |
| TC1400000023.mm.1 | ENSMUST00000121649 | Defa-ps | defensin, alpha, pseudogene 10                  | 21722070  | 21722240  | TC0800000256.mm.1  | 0.0  | 0.661351 |
| TC1400000024.mm.1 | NM_026935          | Sult1c2 | sulfotransferase family, cytosolic, 1C, member  | 53829637  | 53846339  | TC1700002287.mm.1  | 0.1  | 0.661557 |
| TC1400000026.mm.1 | ENSMUST00000166700 | Gm17305 | predicted gene, 17305                           | 69364019  | 69369408  | TC1100000910.mm.1  | 0.0  | 0.661571 |
| TC1400000029.mm.1 | NM_001033231       | Fam195b | family with sequence similarity 195, member B   | 120542888 | 120549727 | TC1100004212.mm.1  | 0.0  | 0.661615 |
| TC1400000030.mm.1 | ENSMUST00000120983 | Gm6441  | predicted gene 6441                             | 145264831 | 145265526 | TC0X000003131.mm.1 | 0.0  | 0.661651 |
| TC1400000033.mm.1 | NM_173382          | Proser1 | proline and serine rich 1                       | 53463666  | 53481760  | TC0300000396.mm.1  | -0.1 | 0.661738 |
| TC1400000034.mm.1 | NM_001123372       | Gm3435  | predicted gene 3435                             | 15009840  | 15041419  | TC1700002769.mm.1  | 0.1  | 0.661962 |
| TC1400000039.mm.1 | ENSMUST00000137155 | Gm14349 | predicted gene 14349                            | 4118240   | 4119931   | TC0X00000014.mm.1  | 0.0  | 0.662026 |
| TC1400000040.mm.1 | NM_172491          | D130040 | RIKEN cDNA D130040H23 gene                      | 69271080  | 69303375  | TC0800000714.mm.1  | 0.0  | 0.662152 |
| TC1400000041.mm.1 | ENSMUST00000180627 | Gm26897 | predicted gene, 26897                           | 111733924 | 111734574 | TC0500001170.mm.1  | -0.1 | 0.662295 |
| TC1400000044.mm.1 | ENSMUST00000159524 | Gm5286  | predicted gene 5286                             | 94196714  | 94199802  | TC0300000858.mm.1  | -0.1 | 0.662447 |

|                   |                    |          |                                                  |           |           |                    |      |          |
|-------------------|--------------------|----------|--------------------------------------------------|-----------|-----------|--------------------|------|----------|
| TC1400000046.mm.1 | NM_025540          | Sln      | sarcolipin                                       | 53850251  | 53853849  | TC0900000648.mm.1  | -0.1 | 0.66257  |
| TC1400000049.mm.1 | ENSMUST00000032353 | Pik3C2G  | ---                                              | 139599480 | 139636074 | TC0600001647.mm.1  | 0.1  | 0.662578 |
| TC1400000052.mm.1 | NM_146787          | Olfr920  | olfactory receptor 920                           | 38752796  | 38756863  | TC0900000415.mm.1  | 0.0  | 0.662658 |
| TC1400000054.mm.1 | NM_146863          | Olfr770  | olfactory receptor 770                           | 129132831 | 129133766 | TC1000003176.mm.1  | 0.0  | 0.662911 |
| TC1400000056.mm.1 | ENSMUST00000166110 | Gm17654  | predicted gene, 17654                            | 43573843  | 43579146  | TC1400001860.mm.1  | 0.0  | 0.663201 |
| TC1400000061.mm.1 | ENSMUST00000121056 | Gm6517   | predicted gene 6517                              | 66890364  | 66890884  | TC0500000643.mm.1  | 0.2  | 0.663247 |
| TC1400000063.mm.1 | NR_026831          | Gm10272  | keratin associated protein 12-4                  | 77706587  | 77706986  | TC1000000763.mm.1  | 0.0  | 0.663295 |
| TC1400000064.mm.1 | XM_003688804       | Gm21082  | predicted gene, 21082                            | 146828618 | 146836618 | TC0400003977.mm.1  | -0.1 | 0.663358 |
| TC1400000066.mm.1 | NM_133933          | Rpn1     | ribophorin I                                     | 88084473  | 88105304  | TC0600001027.mm.1  | -0.1 | 0.663494 |
| TC1400000067.mm.1 | NR_029774          | Mir346   | microRNA 346                                     | 34894609  | 34894706  | TC1400000386.mm.1  | 0.0  | 0.663578 |
| TC1400000070.mm.1 | ENSMUST00000158429 | Gm23350  | predicted gene, 23350                            | 9763160   | 9763262   | TC1800000966.mm.1  | 0.1  | 0.663589 |
| TC1400000072.mm.1 | NM_028898          | Rptor    | regulatory associated protein of MTOR, complex   | 119602905 | 119899591 | TC1100002007.mm.1  | 0.0  | 0.663642 |
| TC1400000078.mm.1 | XM_003689086       | Gm21151  | predicted gene, 21151                            | 69092807  | 69093490  | TC0Y00000187.mm.1  | 0.0  | 0.663733 |
| TC1400000089.mm.1 | XM_001477915       | Gm20932  | predicted gene, 20932                            | 69625835  | 69626518  | TC0Y00000440.mm.1  | 0.0  | 0.663733 |
| TC1400000090.mm.1 | XM_003689117       | Gm21076  | predicted gene, 21076                            | 74788963  | 74789646  | TC0Y00000467.mm.1  | 0.0  | 0.663733 |
| TC1400000092.mm.1 | XM_003689122       | Gm21155  | predicted gene, 21155                            | 76500784  | 76501467  | TC0Y00000476.mm.1  | 0.0  | 0.663733 |
| TC1400000093.mm.1 | XM_001475158       | Gm20861  | predicted gene, 20861                            | 863665740 | 86366423  | TC0Y00000533.mm.1  | 0.0  | 0.663733 |
| TC1400000103.mm.1 | NCBI_Gene:620017:p | Igkv5-3  | immunoglobulin kappa variable 5-39               | 69900424  | 69900995  | TC0600003581.mm.1  | 0.4  | 0.663945 |
| TC1400000112.mm.1 | ENSMUST00000118349 | Gm14556  | predicted gene 14556                             | 38180728  | 38181626  | TC0X00000362.mm.1  | 0.1  | 0.664575 |
| TC1400000135.mm.1 | ENSMUST00000158159 | Gm25370  | predicted gene, 25370                            | 142153864 | 142153957 | TC0700002068.mm.1  | 0.1  | 0.66469  |
| TC1400000143.mm.1 | NM_025954          | Pgp      | phosphoglycolate phosphatase                     | 24470435  | 24472862  | TC1700000339.mm.1  | 0.0  | 0.664712 |
| TC1400000145.mm.1 | ENSMUST00000178222 | Gm21864  | predicted gene, 21864                            | 83287896  | 83288579  | TC0Y00000509.mm.1  | 0.0  | 0.665235 |
| TC1400000150.mm.1 | ENSMUST00000082847 | Gm22686  | predicted gene, 22686                            | 82187682  | 82187781  | TC0X00000804.mm.1  | 0.0  | 0.665421 |
| TC1400000154.mm.1 | ENSMUST00000104181 | Gm23485  | predicted gene, 23485                            | 71039579  | 71039733  | TC0600002458.mm.1  | 0.0  | 0.665469 |
| TC1400000158.mm.1 | ENSMUST00000104405 | Gm26014  | predicted gene, 26014                            | 77682614  | 77682745  | TC1800000830.mm.1  | 0.1  | 0.665705 |
| TC1400000163.mm.1 | ENSMUST00000182552 | Gm27034  | predicted gene, 27034                            | 98714813  | 98715752  | TC1400001151.mm.1  | 0.0  | 0.665721 |
| TC1400000174.mm.1 | ENSMUST00000179678 | Gm22621  | predicted gene, 22621                            | 130113291 | 130113364 | TC0600001544.mm.1  | 0.0  | 0.66593  |
| TC1400000176.mm.1 | NM_134246          | Acot3    | acyl-CoA thioesterase 3                          | 84052144  | 84059565  | TC1200000800.mm.1  | 0.0  | 0.666026 |
| TC1400000177.mm.1 | NM_008289          | Hsd11b2  | hydroxysteroid 11-beta dehydrogenase 2           | 105518746 | 105523988 | TC0800001219.mm.1  | 0.1  | 0.666027 |
| TC1400000199.mm.1 | ENSMUST00000097832 | 4732440  | RIKEN cDNA 4732440D04 gene                       | 6214612   | 6215292   | TC0100001923.mm.1  | 0.0  | 0.666124 |
| TC1400000218.mm.1 | ENSMUST00000179642 | Gm26097  | predicted gene, 26097                            | 59796905  | 59796997  | TC0700003317.mm.1  | 0.0  | 0.66633  |
| TC1400000231.mm.1 | NM_146284          | Olfr780  | olfactory receptor 780                           | 129321569 | 129322593 | TC0100001637.mm.1  | -0.1 | 0.666375 |
| TC1400000246.mm.1 | NM_029377          | Lin37    | lin-37 homolog (C. elegans)                      | 30555441  | 30559838  | TC0700002765.mm.1  | 0.0  | 0.666382 |
| TC1400000252.mm.1 | NM_011674          | Ugt8a    | UDP galactosyltransferase 8A                     | 125865343 | 125956653 | TC0300002895.mm.1  | 0.0  | 0.66668  |
| TC1400000255.mm.1 | ENSMUST00000117926 | Gm13527  | predicted gene 13527                             | 57079748  | 57080438  | TC0200000866.mm.1  | 0.0  | 0.666945 |
| TC1400000279.mm.1 | ENSMUST00000104588 | Gm22371  | predicted gene, 22371                            | 57422244  | 57422373  | TC0100002372.mm.1  | 0.0  | 0.667291 |
| TC1400000293.mm.1 | NM_001170955       | Gm15299  | predicted pseudogene 15299                       | 21315546  | 21316481  | TC0800000231.mm.1  | 0.0  | 0.667407 |
| TC1400000309.mm.1 | ENSMUST00000184709 | CT03023  | N/A                                              | 67074830  | 67074947  | TC1400000954.mm.1  | 0.0  | 0.667428 |
| TC1400000316.mm.1 | NM_001191001       | Lins     | lines homolog (Drosophila)                       | 66689889  | 66717256  | TC0700000997.mm.1  | 0.0  | 0.667443 |
| TC1400000318.mm.1 | ENSMUST00000157916 | Gm24963  | predicted gene, 24963                            | 17251301  | 17251444  | TC0300001681.mm.1  | 0.0  | 0.667756 |
| TC1400000319.mm.1 | ENSMUST00000104404 | Gm26013  | predicted gene, 26013                            | 150710846 | 150710964 | TC0100003692.mm.1  | 0.0  | 0.667782 |
| TC1400000322.mm.1 | NR_035495          | Mir1969  | microRNA 1969                                    | 70925525  | 70925618  | TC0800000774.mm.1  | -0.1 | 0.667928 |
| TC1400000326.mm.1 | ENSMUST00000082795 | Gm22005  | predicted gene, 22005                            | 3291378   | 3291518   | TC0200002843.mm.1  | 0.0  | 0.667952 |
| TC1400000327.mm.1 | NR_037248          | Mir4660  | microRNA 4660                                    | 10472540  | 10472623  | TC0200000102.mm.1  | 0.0  | 0.668152 |
| TC1400000329.mm.1 | ENSMUST00000165220 | Gm9742   | predicted gene 9742                              | 8029828   | 8038106   | TC1300001406.mm.1  | 0.0  | 0.668211 |
| TC1400000331.mm.1 | NM_028113          | Amer2    | APC membrane recruitment 2                       | 60378286  | 60381003  | TC1400000846.mm.1  | 0.0  | 0.668245 |
| TC1400000335.mm.1 | NM_207104          | Haus7    | HAUS augmin-like complex, subunit 7              | 73437315  | 73459044  | TC0X00002428.mm.1  | 0.0  | 0.668308 |
| TC1400000336.mm.1 | ENSMUST00000117703 | Gm15209  | predicted gene 15209                             | 162894755 | 162895154 | TC0X00003315.mm.1  | 0.0  | 0.668568 |
| TC1400000340.mm.1 | NM_009433          | Tspyl1   | testis-specific protein, Y-encoded-like 1        | 34282190  | 34285275  | TC1000000297.mm.1  | -0.1 | 0.6686   |
| TC1400000341.mm.1 | NR_028518          | Scarna3  | small Cajal body-specific RNA 3A                 | 159340283 | 159340424 | TC0100001446.mm.1  | 0.1  | 0.668601 |
| TC1400000352.mm.1 | NM_013850          | Abca7    | ATP-binding cassette, sub-family A (ABC1), mem   | 79996494  | 80015572  | TC1000000835.mm.1  | 0.0  | 0.668862 |
| TC1400000354.mm.1 | NM_001081309       | Pik3r4   | phosphatidylinositol 3 kinase, regulatory subun  | 105642995 | 105687655 | TC0900001329.mm.1  | 0.0  | 0.668917 |
| TC1400000356.mm.1 | ENSMUST00000082590 | Gm26441  | predicted gene, 26441                            | 151261918 | 151262021 | TC0X00003177.mm.1  | 0.0  | 0.668998 |
| TC1400000361.mm.1 | ENSMUST00000082884 | Gm22359  | predicted gene, 22359                            | 154711258 | 154711365 | TC0X00001571.mm.1  | -0.1 | 0.669064 |
| TC1400000363.mm.1 | ENSMUST00000104084 | Gm22780  | predicted gene, 22780                            | 96318487  | 96318618  | TC0800002760.mm.1  | 0.1  | 0.669231 |
| TC1400000366.mm.1 | ENSMUST00000126961 | Gm15280  | predicted gene 15280                             | 31347183  | 31347822  | TC0X00002014.mm.1  | 0.1  | 0.669263 |
| TC1400000369.mm.1 | ENSMUST00000184596 | AC16772  | N/A                                              | 107448819 | 107448944 | TC0600002879.mm.1  | 0.1  | 0.669724 |
| TC1400000371.mm.1 | ENSMUST00000182524 | Gm2076   | predicted gene 2076                              | 93293781  | 93294751  | TC1300001041.mm.1  | 0.1  | 0.669845 |
| TC1400000376.mm.1 | NM_001110242       | 1810043  | RIKEN cDNA 1810043H04 gene                       | 120098928 | 120100704 | TC1100002018.mm.1  | 0.0  | 0.669913 |
| TC1400000386.mm.1 | NR_003650          | Ppp1r2-  | protein phosphatase 1, regulatory (inhibitor) s  | 30538876  | 30539679  | TC1900001359.mm.1  | -0.1 | 0.670004 |
| TC1400000389.mm.1 | ENSMUST00000101993 | Gm26135  | predicted gene, 26135                            | 88857693  | 88857764  | TC09000002810.mm.1 | 0.2  | 0.67011  |
| TC1400000390.mm.1 | NM_026914          | Smdt1    | single-pass membrane protein with aspartate ric  | 82345954  | 82349091  | TC1500002336.mm.1  | -0.1 | 0.670783 |
| TC1400000394.mm.1 | XM_001474206       | Gm6445   | predicted gene 6445                              | 9597692   | 9608485   | TC1900000176.mm.1  | 0.0  | 0.671041 |
| TC1400000404.mm.1 | NM_001013820       | Slc22a2  | solute carrier family 22, member 28              | 8062209   | 8131982   | TC1900001059.mm.1  | 0.1  | 0.671828 |
| TC1400000405.mm.1 | XM_991187          | Gm8700   | predicted gene 8700                              | 50099026  | 50104045  | TC1300001970.mm.1  | -0.1 | 0.672609 |
| TC1400000406.mm.1 | NM_028775          | Cyp2s1   | cytochrome P450, family 2, subfamily s, polypep  | 25802471  | 25816913  | TC0700002646.mm.1  | 0.0  | 0.672745 |
| TC1400000408.mm.1 | ENSMUST00000184021 | ST7-OT4  | ST7 overlapping transcript 4 conserved region 4  | 17703231  | 17703416  | TC0600000139.mm.1  | 0.1  | 0.6728   |
| TC1400000414.mm.1 | ENSMUST00000169219 | Gm7809   | predicted gene 7809                              | 21966175  | 21968272  | TC1700001566.mm.1  | 0.0  | 0.673311 |
| TC1400000417.mm.1 | ENSMUST00000104293 | Gm25272  | predicted gene, 25272                            | 123933718 | 123933845 | TC1400001350.mm.1  | -0.1 | 0.673545 |
| TC1400000420.mm.1 | ENSMUST00000158793 | Gm22016  | predicted gene, 22016                            | 141314355 | 141314468 | TC0100001312.mm.1  | 0.1  | 0.673901 |
| TC1400000426.mm.1 | ENSMUST00000157270 | Gm25281  | predicted gene, 25281                            | 85333901  | 85334004  | TC1000001029.mm.1  | 0.1  | 0.673928 |
| TC1400000432.mm.1 | NM_008013          | Fgl2     | fibrinogen-like protein 2                        | 21372642  | 21378386  | TC0500000171.mm.1  | 0.0  | 0.67411  |
| TC1400000443.mm.1 | NM_023386          | Rtp4     | receptor transporter protein 4                   | 23609919  | 23614222  | TC1600000346.mm.1  | 0.0  | 0.674153 |
| TC1400000444.mm.1 | NM_001077529       | Nme2     | NME/NM23 nucleoside diphosphate kinase 2         | 93949814  | 93956259  | TC1100004295.mm.1  | 0.0  | 0.674155 |
| TC1400000452.mm.1 | NM_001031664       | Nudt10   | nudix (nucleoside diphosphate linked moiety X)-  | 6168696   | 6173015   | TC0X00001760.mm.1  | 0.0  | 0.674205 |
| TC1400000453.mm.1 | NM_011418          | Smarbcb1 | SWI/SNF related, matrix associated, actin depen  | 75896769  | 75921617  | TC1000002391.mm.1  | 0.0  | 0.674292 |
| TC1400000459.mm.1 | NM_153510          | Pilra    | paired immunoglobulin-like type 2 receptor alpha | 137821952 | 137836278 | TC0500003463.mm.1  | 0.0  | 0.674334 |
| TC1400000470.mm.1 | ENSMUST00000182941 | Gm7583   | predicted gene 7583                              | 67782777  | 67783781  | TC0700003453.mm.1  | 0.0  | 0.674359 |

|                   |                    |         |                                                 |           |           |                   |      |          |
|-------------------|--------------------|---------|-------------------------------------------------|-----------|-----------|-------------------|------|----------|
| TC1400000485.mm.1 | NM_029398          | Tmem14a | transmembrane protein 14A                       | 21218575  | 21230167  | TC0100000133.mm.1 | 0.0  | 0.674838 |
| TC1400000493.mm.1 | ENSMUST00000157570 | Gm23901 | predicted gene, 23901                           | 162850158 | 162850264 | TC0X00003312.mm.1 | 0.0  | 0.674926 |
| TC1400000501.mm.1 | NM_146085          | Apb3    | amyloid beta (A4) precursor protein-binding, fa | 36671159  | 36679366  | TC1800001748.mm.1 | 0.0  | 0.6751   |
| TC1400000502.mm.1 | NM_145131          | Pitrm1  | pitrilysin metallepetidase 1                    | 6548157   | 6580158   | TC1300000033.mm.1 | -0.1 | 0.67565  |
| TC1400000513.mm.1 | ENSMUST00000077150 | LOC1010 | uncharacterized LOC101056542 // uncharacteri    | 131647825 | 131648594 | TC0200002021.mm.1 | 0.0  | 0.676088 |
| TC1400000517.mm.1 | NM_175638          | Wnk4    | WNK lysine deficient protein kinase 4           | 101260567 | 101277409 | TC1100001646.mm.1 | 0.1  | 0.676148 |
| TC1400000524.mm.1 | NM_026181          | Gpatch1 | G patch domain containing 1                     | 35276536  | 35318440  | TC0700002849.mm.1 | 0.0  | 0.676248 |
| TC1400000528.mm.1 | ENSMUST00000175604 | Gm26112 | predicted gene, 26112                           | 106071615 | 106071874 | TC0800002850.mm.1 | 0.0  | 0.67645  |
| TC1400000529.mm.1 | NM_028890          | 4931414 | RIKEN cDNA 4931414P19 gene                      | 54583663  | 54605908  | TC1400002060.mm.1 | 0.0  | 0.67673  |
| TC1400000541.mm.1 | ENSMUST00000182449 | Gm6944  | predicted gene 6944                             | 55972286  | 55973291  | TC1800000561.mm.1 | 0.1  | 0.676879 |
| TC1400000542.mm.1 | NR_037301          | Mir3470 | microRNA 3470a                                  | 83090311  | 83090387  | TC0600002558.mm.1 | -0.1 | 0.676993 |
| TC1400000547.mm.1 | ENSMUST00000087884 | Gm10212 | predicted pseudogene 10212                      | 11569447  | 11573114  | TC1900000227.mm.1 | 0.0  | 0.677381 |
| TC1400000552.mm.1 | NM_007517          | Aup1    | ancient ubiquitous protein 1                    | 83054653  | 83057682  | TC0600000916.mm.1 | 0.0  | 0.6774   |
| TC1400000565.mm.1 | ENSMUST00000184260 | RP23-21 | N/A                                             | 108708908 | 108712653 | TC0300001153.mm.1 | 0.0  | 0.677409 |
| TC1400000566.mm.1 | NM_001136066       | Hmox2   | heme oxygenase (decycling) 2                    | 4726361   | 4766742   | TC1600000033.mm.1 | 0.0  | 0.677487 |
| TC1400000569.mm.1 | ENSMUST00000173265 | Gm18200 | predicted gene, 18200                           | 7982512   | 7986446   | TC0700002248.mm.1 | 0.0  | 0.678052 |
| TC1400000572.mm.1 | ENSMUST00000173820 | Gm18199 | predicted gene, 18199                           | 9519901   | 9523828   | TC0700002292.mm.1 | 0.0  | 0.678052 |
| TC1400000573.mm.1 | NM_172603          | Phf11a  | PHD finger protein 11A                          | 59276913  | 59297522  | TC1400002161.mm.1 | -0.1 | 0.678306 |
| TC1400000574.mm.1 | ENSMUST00000175041 | Gm23045 | predicted gene, 23045                           | 140692697 | 140692792 | TC0400001765.mm.1 | -0.1 | 0.678377 |
| TC1400000575.mm.1 | NM_009680          | Ap3b1   | adaptor-related protein complex 3, beta 1 subur | 94358960  | 94566316  | TC1300001061.mm.1 | -0.1 | 0.678392 |
| TC1400000578.mm.1 | ENSMUST00000122577 | n-R5s19 | nuclear encoded rRNA 5S 192                     | 124820821 | 124820939 | TC0400001429.mm.1 | 0.0  | 0.678465 |
| TC1400000580.mm.1 | ENSMUST00000122670 | Gm25045 | predicted gene, 25045                           | 72121806  | 72121904  | TC0900002629.mm.1 | 0.0  | 0.678555 |
| TC1400000581.mm.1 | ENSMUST00000121910 | Gm11284 | predicted gene 11284                            | 22163886  | 22165807  | TC1300001583.mm.1 | -0.1 | 0.678584 |
| TC1400000583.mm.1 | ENSMUST00000119907 | Gm11966 | predicted gene 11966                            | 5818497   | 5818583   | TC1100002153.mm.1 | -0.1 | 0.67884  |
| TC1400000592.mm.1 | NR_037310          | Mir1186 | microRNA 1186b                                  | 95963544  | 95963607  | TC0800001152.mm.1 | -0.1 | 0.679162 |
| TC1400000594.mm.1 | NM_021422          | Dnaja4  | Dnaj (Hsp40) homolog, subfamily A, member 4     | 54698873  | 54716317  | TC0900000660.mm.1 | 0.0  | 0.679294 |
| TC1400000596.mm.1 | ENSMUST00000118219 | Gm12039 | predicted gene 12039                            | 21280045  | 21280224  | TC1100002323.mm.1 | 0.1  | 0.679294 |
| TC1400000610.mm.1 | NM_024180          | Ormdl2  | ORM1-like 2 (S. cerevisiae)                     | 128817457 | 128821631 | TC1000003164.mm.1 | 0.0  | 0.679437 |
| TC1400000613.mm.1 | ENSMUST00000179579 | Gm25255 | predicted gene, 25255                           | 15418536  | 15418645  | TC0800000158.mm.1 | 0.1  | 0.67946  |
| TC1400000615.mm.1 | NM_146774          | Olf472  | olfactory receptor 472                          | 107902627 | 107903709 | TC0700001585.mm.1 | 0.0  | 0.679796 |
| TC1400000616.mm.1 | NM_001146005       | C5ar2   | complement component 5a receptor 2              | 16234585  | 16244154  | TC0700002421.mm.1 | 0.0  | 0.679849 |
| TC1400000617.mm.1 | ENSMUST00000180973 | Gm3809  | predicted gene 3809                             | 186960508 | 186961513 | TC0100001800.mm.1 | 0.1  | 0.679904 |
| TC1400000618.mm.1 | ENSMUST00000117483 | Gm13378 | predicted gene 13378                            | 21244105  | 21244440  | TC0200000341.mm.1 | -0.1 | 0.680173 |
| TC1400000619.mm.1 | NM_194057          | Ffar1   | free fatty acid receptor 1                      | 30860473  | 30861564  | TC0700002778.mm.1 | 0.0  | 0.680304 |
| TC1400000620.mm.1 | ENSMUST00000157712 | Gm22845 | predicted gene, 22845                           | 9865347   | 9865450   | TC1200001410.mm.1 | 0.1  | 0.680435 |
| TC1400000621.mm.1 | ENSMUST00000183930 | AC15835 | N/A                                             | 15020535  | 15020644  | TC1000001448.mm.1 | 0.1  | 0.680651 |
| TC1400000623.mm.1 | XM_001472958       | Gm20808 | predicted gene, 20808                           | 78761355  | 78762038  | TC0Y00000484.mm.1 | 0.0  | 0.680738 |
| TC1400000624.mm.1 | XM_001471505       | Gm20791 | predicted gene, 20791                           | 80681820  | 80682503  | TC0Y00000494.mm.1 | 0.0  | 0.680738 |
| TC1400000625.mm.1 | NM_019821          | GltP    | glycolipid transfer protein                     | 114669403 | 114690984 | TC0500003064.mm.1 | 0.1  | 0.681067 |
| TC1400000626.mm.1 | NM_194335          | Naif1   | nuclear apoptosis inducing factor 1             | 32450457  | 32456953  | TC0200000581.mm.1 | 0.0  | 0.681119 |
| TC1400000627.mm.1 | NM_178772          | Nche1   | neutral cholesterol ester hydrolase 1           | 27284608  | 27284608  | TC0300000159.mm.1 | 0.1  | 0.681238 |
| TC1400000628.mm.1 | ENSMUST00000158367 | Gm22769 | predicted gene, 22769                           | 63747437  | 63747534  | TC1600001831.mm.1 | 0.0  | 0.681313 |
| TC1400000629.mm.1 | NM_011863          | Papss1  | 3-phosphoadenosine 5-phosphosulfate synthase    | 131564768 | 131643671 | TC0300001338.mm.1 | 0.0  | 0.68136  |
| TC1400000630.mm.1 | ENSMUST00000183825 | mmu-mir | mmu-mir-7660                                    | 115775657 | 115775719 | TC0600001287.mm.1 | 0.0  | 0.681632 |
| TC1400000631.mm.1 | NR_106120          | Mir7660 | microRNA mir-7660 (Mir7660), microRNA.          | 0         | 0         | TSUnmapped0000010 | 0.0  | 0.681632 |
| TC1400000632.mm.1 | ENSMUST00000167421 | CAA011  | N/A                                             | 25190     | 25788     | TCX_GL456233_rand | 0.1  | 0.681648 |
| TC1400000633.mm.1 | NM_026753          | Fam96b  | family with sequence similarity 96, member B    | 104639838 | 104641965 | TC0800002808.mm.1 | 0.0  | 0.681964 |
| TC1400000634.mm.1 | ENSMUST00000185162 | SNORA7  | Small nucleolar RNA SNORA7                      | 51938974  | 51939095  | TC0100002311.mm.1 | -0.1 | 0.682058 |
| TC1400000635.mm.1 | ENSMUST00000104076 | Gm24429 | predicted gene, 24429                           | 34895024  | 34895155  | TC1200000300.mm.1 | 0.1  | 0.682245 |
| TC1400000636.mm.1 | NM_033523          | Spred2  | sprouty-related, EVH1 domain containing 2       | 19924372  | 20024026  | TC1100000187.mm.1 | 0.0  | 0.682687 |
| TC1400000639.mm.1 | NM_133805          | Cops8   | COP9 (constitutive photomorphogenic) homolog    | 90603425  | 90613341  | TC0100000878.mm.1 | 0.0  | 0.683382 |
| TC1400000641.mm.1 | ENSMUST00000104267 | Gm25917 | predicted gene, 25917                           | 56252315  | 56252444  | TC1200001781.mm.1 | 0.1  | 0.683512 |
| TC1400000642.mm.1 | NM_008158          | Gpr27   | G protein-coupled receptor 27                   | 99692679  | 99693818  | TC0600001146.mm.1 | 0.0  | 0.683565 |
| TC1400000643.mm.1 | NM_001166657       | Cdk13   | cyclin-dependent kinase-like 3                  | 52004221  | 52089784  | TC1100000585.mm.1 | 0.0  | 0.683581 |
| TC1400000644.mm.1 | NM_021550          | C1galt1 | C1GALT1-specific chaperone 1                    | 38630783  | 38635143  | TC0X00003426.mm.1 | 0.0  | 0.683934 |
| TC1400000646.mm.1 | NM_025548          | Tbcb    | tubulin folding cofactor B                      | 30224131  | 30232272  | TC0700002747.mm.1 | 0.0  | 0.683941 |
| TC1400000649.mm.1 | NR_029735          | Mir16-2 | microRNA 16-2                                   | 69009902  | 69009996  | TC0300000576.mm.1 | 0.0  | 0.684042 |
| TC1400000650.mm.1 | ENSMUST00000174903 | Gm23564 | predicted gene, 23564                           | 84893087  | 84893153  | TC1100001284.mm.1 | 0.1  | 0.684103 |
| TC1400000651.mm.1 | ENSMUST00000182585 | Gm7765  | predicted gene 7765                             | 16365184  | 16366157  | TC1600001260.mm.1 | 0.0  | 0.684392 |
| TC1400000653.mm.1 | NM_009660          | Alox15  | arachidonate 15-lipoxygenase                    | 70344147  | 70352031  | TC1100003093.mm.1 | -0.1 | 0.684416 |
| TC1400000654.mm.1 | NM_001123370       | 9030025 | RIKEN cDNA 9030025P20 gene                      | 14978864  | 14991577  | TC1700002768.mm.1 | 0.1  | 0.684436 |
| TC1400000655.mm.1 | NM_008562          | Mcl1    | myeloid cell leukemia sequence 1                | 95658721  | 95663179  | TC0300000910.mm.1 | -0.1 | 0.684529 |
| TC1400000656.mm.1 | NM_183315          | Ctxn1   | cortixin 1                                      | 4257646   | 4259274   | TC0800001632.mm.1 | 0.0  | 0.684801 |
| TC1400000659.mm.1 | NM_029341          | Capsl   | calcyphosine-like                               | 9436028   | 9466035   | TC1500000074.mm.1 | 0.0  | 0.684821 |
| TC1400000660.mm.1 | ENSMUST00000178281 | Gm21879 | predicted gene, 21879                           | 85016812  | 85017495  | TC0Y00000520.mm.1 | 0.0  | 0.685043 |
| TC1400000661.mm.1 | ENSMUST00000175148 | Gm22121 | predicted gene, 22121                           | 44469013  | 44469066  | TC1100000438.mm.1 | 0.1  | 0.685453 |
| TC1400000662.mm.1 | NM_001168294       | Serpina | serine (or cysteine) peptidase inhibitor, clade | 104214544 | 104221129 | TC1200002524.mm.1 | 0.0  | 0.68547  |
| TC1400000663.mm.1 | NM_033041          | Hes7    | hairly and enhancer of split 7 (Drosophila)     | 69120404  | 69124055  | TC1100000901.mm.1 | 0.0  | 0.685843 |
| TC1400000664.mm.1 | NR_073378          | Gm8363  | non-SMC condensin II complex, subunit H2 pseu   | 5480989   | 5483069   | TC1700001368.mm.1 | 0.0  | 0.6861   |
| TC1400000665.mm.1 | NM_008631          | Mt4     | metallothionein 4                               | 94137204  | 94139031  | TC0800001092.mm.1 | 0.0  | 0.686411 |
| TC1400000669.mm.1 | NM_001039119       | Defb33  | defensin beta 33                                | 20892667  | 20897723  | TC0800000209.mm.1 | 0.0  | 0.686413 |
| TC1400000670.mm.1 | ENSMUST00000052528 | Gm9847  | predicted pseudogene 9847                       | 14494561  | 14495157  | TC1200000114.mm.1 | 0.0  | 0.686695 |
| TC1400000672.mm.1 | NM_028769          | Syvn1   | synovial apoptosis inhibitor 1, synoviolin      | 6046576   | 6053718   | TC1900000094.mm.1 | 0.0  | 0.687734 |
| TC1400000673.mm.1 | NM_153193          | Hsd3b2  | hydroxy-delta-5-steroid dehydrogenase, 3 beta-  | 98709255  | 98724576  | TC0300002558.mm.1 | 0.1  | 0.687739 |
| TC1400000677.mm.1 | NM_001080964       | Sp2     | Sp2 transcription factor                        | 96953337  | 96982959  | TC1100003630.mm.1 | 0.0  | 0.687796 |
| TC1400000681.mm.1 | NM_028116          | Pygo1   | pygopus 1                                       | 72925645  | 72952181  | TC0900000982.mm.1 | 0.0  | 0.687959 |
| TC1400000683.mm.1 | ENSMUST00000183577 | AC12505 | N/A                                             | 5201198   | 5201303   | TC1900000955.mm.1 | -0.1 | 0.688134 |
| TC1400000684.mm.1 | ENSMUST00000104472 | Gm24257 | predicted gene, 24257                           | 70148806  | 70148936  | TC0900002589.mm.1 | 0.1  | 0.688366 |

|                   |                    |         |                                                 |           |           |                    |      |          |
|-------------------|--------------------|---------|-------------------------------------------------|-----------|-----------|--------------------|------|----------|
| TC1400000685.mm.1 | ENSMUST00000104333 | Gm25378 | predicted gene, 25378                           | 28365316  | 28365444  | TC0400000228.mm.1  | 0.1  | 0.688749 |
| TC1400000686.mm.1 | NM_001033297       | Gm561   | predicted gene 561                              | 144594054 | 144595366 | TC0200002151.mm.1  | 0.0  | 0.688815 |
| TC1400000688.mm.1 | NR_034045          | Snora30 | small nucleolar RNA, H/ACA box 30               | 127528003 | 127528003 | TC0700001853.mm.1  | -0.2 | 0.688922 |
| TC1400000689.mm.1 | ENSMUST00000178600 | Gm17045 | predicted gene 17045                            | 6034967   | 6035810   | TC1400000056.mm.1  | 0.1  | 0.689124 |
| TC1400000690.mm.1 | ENSMUST00000127017 | Gm11192 | predicted gene 11192                            | 78278738  | 78279066  | TC1100003293.mm.1  | 0.0  | 0.689157 |
| TC1400000692.mm.1 | ENSMUST00000178653 | Gm25754 | predicted gene, 25754                           | 83795912  | 83796032  | TC0100000722.mm.1  | 0.1  | 0.689356 |
| TC1400000693.mm.1 | ENSMUST00000178897 | Gm24802 | predicted gene, 24802                           | 195228278 | 195228398 | TC0100001888.mm.1  | 0.1  | 0.689356 |
| TC1400000695.mm.1 | ENSMUST00000178780 | Gm22419 | predicted gene, 22419                           | 47749279  | 47749399  | TC0100002294.mm.1  | 0.1  | 0.689356 |
| TC1400000696.mm.1 | ENSMUST00000117032 | Gm22112 | predicted gene, 22112                           | 82396697  | 82396817  | TC0100002671.mm.1  | 0.1  | 0.689356 |
| TC1400000697.mm.1 | ENSMUST00000116833 | Gm24744 | predicted gene, 24744                           | 119831937 | 119832057 | TC0300001225.mm.1  | 0.1  | 0.689356 |
| TC1400000698.mm.1 | ENSMUST00000116701 | Gm26137 | predicted gene, 26137                           | 119837904 | 119838024 | TC0300001226.mm.1  | 0.1  | 0.689356 |
| TC1400000699.mm.1 | ENSMUST00000116940 | Gm22029 | predicted gene, 22029                           | 55162314  | 55162434  | TC0300001993.mm.1  | 0.1  | 0.689356 |
| TC1400000700.mm.1 | ENSMUST00000117026 | Gm25347 | predicted gene, 25347                           | 115484016 | 115484136 | TC0300002791.mm.1  | 0.1  | 0.689356 |
| TC1400000702.mm.1 | ENSMUST00000179294 | Gm24567 | predicted gene, 24567                           | 15819909  | 15820029  | TC0400000137.mm.1  | 0.1  | 0.689356 |
| TC1400000703.mm.1 | ENSMUST00000178126 | Gm22991 | predicted gene, 22991                           | 155911630 | 155911750 | TC0400002099.mm.1  | 0.1  | 0.689356 |
| TC1400000705.mm.1 | ENSMUST00000180209 | Gm23304 | predicted gene, 23304                           | 33628841  | 33628961  | TC0400002377.mm.1  | 0.1  | 0.689356 |
| TC1400000706.mm.1 | ENSMUST00000116717 | Gm25774 | predicted gene, 25774                           | 103415806 | 103415926 | TC0700001493.mm.1  | 0.1  | 0.689356 |
| TC1400000707.mm.1 | ENSMUST00000116713 | Gm25778 | predicted gene, 25778                           | 128826347 | 128826467 | TC0700001894.mm.1  | 0.1  | 0.689356 |
| TC1400000708.mm.1 | ENSMUST00000116700 | Gm26248 | predicted gene, 26248                           | 11303218  | 11303338  | TC0700002324.mm.1  | 0.1  | 0.689356 |
| TC1400000710.mm.1 | ENSMUST00000116959 | Gm23844 | predicted gene, 23844                           | 67778410  | 67778530  | TC0700003452.mm.1  | 0.1  | 0.689356 |
| TC1400000711.mm.1 | ENSMUST00000116784 | Gm23177 | predicted gene, 23177                           | 34295856  | 34295976  | TC0800002026.mm.1  | 0.1  | 0.689356 |
| TC1400000712.mm.1 | ENSMUST00000116704 | Gm26190 | predicted gene, 26190                           | 25812855  | 25812975  | TC0900001937.mm.1  | 0.1  | 0.689356 |
| TC1400000713.mm.1 | ENSMUST00000116730 | Gm22102 | predicted gene, 22102                           | 106697078 | 106697198 | TC0X00001078.mm.1  | 0.1  | 0.689356 |
| TC1400000715.mm.1 | ENSMUST00000116801 | Gm24193 | predicted gene, 24193                           | 61823544  | 61823664  | TC1300002157.mm.1  | 0.1  | 0.689356 |
| TC1400000720.mm.1 | ENSMUST00000178964 | Gm25208 | predicted gene, 25208                           | 42274419  | 42274539  | TC1400001825.mm.1  | 0.1  | 0.689356 |
| TC1400000723.mm.1 | ENSMUST00000180121 | Gm25228 | predicted gene, 25228                           | 42614226  | 42614346  | TC1400001835.mm.1  | 0.1  | 0.689356 |
| TC1400000725.mm.1 | ENSMUST00000116896 | Gm24427 | predicted gene, 24427                           | 24304669  | 24304789  | TC1700000334.mm.1  | 0.1  | 0.689356 |
| TC1400000726.mm.1 | ENSMUST00000116918 | Gm22346 | predicted gene, 22346                           | 87184105  | 87184225  | TC1700002684.mm.1  | 0.1  | 0.689356 |
| TC1400000727.mm.1 | ENSMUST00000116938 | Gm23606 | predicted gene, 23606                           | 24558602  | 24558722  | TC1800000198.mm.1  | 0.1  | 0.689356 |
| TC1400000728.mm.1 | ENSMUST00000116705 | Gm24617 | predicted gene, 24617                           | 46367365  | 46367485  | TC1800000478.mm.1  | 0.1  | 0.689356 |
| TC1400000729.mm.1 | ENSMUST00000117009 | Gm24484 | predicted gene, 24484                           | 9908158   | 9908278   | TC1900000180.mm.1  | 0.1  | 0.689356 |
| TC1400000730.mm.1 | NM_001085545       | Gm14345 | predicted gene 14345                            | 3441731   | 3443690   | TC0X00001723.mm.1  | 0.0  | 0.689374 |
| TC1400000731.mm.1 | ENSMUST00000042595 | Gm6685  | predicted pseudogene 6685                       | 28339104  | 28339867  | TC1100002404.mm.1  | 0.1  | 0.690053 |
| TC1400000732.mm.1 | NM_001163585       | Prom1   | prominin 1                                      | 43993622  | 44102032  | TC0500002320.mm.1  | 0.1  | 0.690231 |
| TC1400000733.mm.1 | XM_001477846       | Rnf213  | ring finger protein 213                         | 119393100 | 119487425 | TC1100002003.mm.1  | 0.1  | 0.690248 |
| TC1400000734.mm.1 | ENSMUST00000117256 | Gm12306 | predicted gene 12306                            | 69074490  | 69074660  | TC1100000896.mm.1  | 0.0  | 0.690264 |
| TC1400000735.mm.1 | ENSMUST00000124513 | Gm15247 | predicted gene 15247                            | 169985801 | 169986939 | TC0X00003380.mm.1  | 0.0  | 0.690644 |
| TC1400000736.mm.1 | NM_027994          | Cand1   | cullin associated and neddylation disassociated | 119198812 | 119240055 | TC1000003007.mm.1  | 0.0  | 0.690674 |
| TC1400000738.mm.1 | NM_133746          | Calhm2  | calcium homeostasis modulator 2                 | 47105353  | 47138294  | TC1900001622.mm.1  | -0.1 | 0.690721 |
| TC1400000739.mm.1 | NM_001160144       | Gm20816 | predicted gene, 20816                           | 68537955  | 68540286  | TC0Y00000185.mm.1  | 0.0  | 0.690745 |
| TC1400000740.mm.1 | XM_003689125       | Gm21180 | predicted gene, 21180                           | 77073914  | 77076246  | TC17000000478.mm.1 | 0.0  | 0.690745 |
| TC1400000742.mm.1 | NM_133995          | Upb1    | ureidopropionase, beta                          | 75406911  | 75441679  | TC1000000713.mm.1  | 0.0  | 0.690809 |
| TC1400000745.mm.1 | ENSMUST00000182522 | Gm3534  | predicted pseudogene 3534                       | 48408618  | 48409618  | TC1400000529.mm.1  | 0.1  | 0.690932 |
| TC1400000747.mm.1 | ENSMUST00000109542 | Gm17132 | predicted gene 17132                            | 127877333 | 127878490 | TC0500001489.mm.1  | 0.2  | 0.691113 |
| TC1400000752.mm.1 | ENSMUST00000174927 | Gm22401 | predicted gene, 22401                           | 100700621 | 100700737 | TC1400001167.mm.1  | 0.0  | 0.691133 |
| TC1400000753.mm.1 | XR_141309          | Gm15821 | predicted gene 15821                            | 34211312  | 34214459  | TC1700001904.mm.1  | 0.0  | 0.691167 |
| TC1400000755.mm.1 | XM_001473587       | Gm2436  | predicted gene 2436                             | 55142077  | 55154918  | TC1200001761.mm.1  | 0.0  | 0.691472 |
| TC1400000767.mm.1 | XM_001473627       | Gm2446  | predicted gene 2446                             | 55217141  | 55229982  | TC1200001762.mm.1  | 0.0  | 0.691472 |
| TC1400000771.mm.1 | ENSMUST00000091897 | Gm5507  | predicted gene 5507                             | 53984321  | 53985328  | TC1800000546.mm.1  | 0.1  | 0.691573 |
| TC1400000777.mm.1 | ENSMUST00000047300 | Gm9774  | predicted pseudogene 9774                       | 92428066  | 92429423  | TC0300002390.mm.1  | 0.0  | 0.692127 |
| TC1400000781.mm.1 | ENSMUST00000178295 | Gm23108 | predicted gene, 23108                           | 10484490  | 10484613  | TC0200000128.mm.1  | 0.0  | 0.692129 |
| TC1400000791.mm.1 | ENSMUST00000116948 | Gm24673 | predicted gene, 24673                           | 10491860  | 10491983  | TC0200000146.mm.1  | 0.0  | 0.692129 |
| TC1400000802.mm.1 | NM_177471          | Ccdc69  | coiled-coil domain containing 69                | 55049731  | 55078131  | TC1100002773.mm.1  | 0.0  | 0.692491 |
| TC1400000803.mm.1 | ENSMUST00000102348 | Gm23061 | predicted gene, 23061                           | 17928111  | 17928226  | TC1900000318.mm.1  | 0.0  | 0.69256  |
| TC1400000807.mm.1 | ENSMUST00000166618 | Gm6356  | predicted gene 6356                             | 6965447   | 6997291   | TC1400001418.mm.1  | 0.0  | 0.692561 |
| TC1400000808.mm.1 | ENSMUST00000185041 | AC10038 | N/A                                             | 85284233  | 85284333  | TC1000002607.mm.1  | 0.0  | 0.692603 |
| TC1400000813.mm.1 | NM_008109          | Gdf5    | growth differentiation factor 5                 | 155941023 | 155945367 | TC0200004978.mm.1  | 0.0  | 0.692772 |
| TC1400000817.mm.1 | NM_024209          | Ppp6c   | protein phosphatase 6, catalytic subunit        | 39194354  | 39226451  | TC0200003440.mm.1  | -0.1 | 0.692903 |
| TC1400000822.mm.1 | NM_026689          | Mul1    | mitochondrial ubiquitin ligase activator of NFK | 138434671 | 138442265 | TC0400001726.mm.1  | 0.0  | 0.692927 |
| TC1400000827.mm.1 | ENSMUST00000165289 | Gm3173  | predicted gene 3173 // predicted gene 3095      | 5015891   | 5019119   | TC1400002794.mm.1  | 0.1  | 0.692989 |
| TC1400000829.mm.1 | NM_028281          | Pcbd2   | pterin 4 alpha carbinolamine dehydratase/dimer  | 55727368  | 55776830  | TC1300000675.mm.1  | 0.0  | 0.693336 |
| TC1400000832.mm.1 | XM_003688921       | Gm21103 | predicted gene, 21103                           | 6296365   | 6304843   | TC1400001408.mm.1  | 0.0  | 0.693584 |
| TC1400000835.mm.1 | ENSMUST00000096847 | Gm21784 | predicted gene, 21784                           | 74225857  | 74226539  | TC0Y00000464.mm.1  | 0.0  | 0.69361  |
| TC1400000837.mm.1 | NM_007596          | Caml    | calcium modulating ligand                       | 55623005  | 55632416  | TC1300000670.mm.1  | 0.0  | 0.693637 |
| TC1400000846.mm.1 | ENSMUST00000173464 | Gm20525 | predicted gene 20525                            | 36723234  | 36723281  | TC1700000740.mm.1  | 0.1  | 0.693702 |
| TC1400000853.mm.1 | NM_010203          | Fgf5    | fibroblast growth factor 5                      | 98254184  | 98277033  | TC0500000948.mm.1  | -0.1 | 0.694156 |
| TC1400000854.mm.1 | ENSMUST00000184754 | 5S_rRNA | 5S ribosomal RNA                                | 162237099 | 162237226 | TC0X00001643.mm.1  | 0.0  | 0.694364 |
| TC1400000862.mm.1 | NM_178601          | Imp4    | IMP4, U3 small nucleolar ribonucleoprotein, hon | 34439829  | 34445747  | TC0100000222.mm.1  | -0.1 | 0.694607 |
| TC1400000868.mm.1 | NM_033175          | Lce3c   | late cornified envelope 3C                      | 92944486  | 92945730  | TC0300000835.mm.1  | 0.0  | 0.69462  |
| TC1400000870.mm.1 | ENSMUST00000182720 | Gm8349  | predicted gene 8349                             | 61462859  | 61462861  | TC0300002065.mm.1  | 0.1  | 0.694624 |
| TC1400000881.mm.1 | ENSMUST00000104097 | Gm26394 | predicted gene, 26394                           | 98999508  | 98999622  | TC1100001590.mm.1  | 0.1  | 0.694654 |
| TC1400000894.mm.1 | ENSMUST00000157925 | Gm22099 | predicted gene, 22099                           | 60419863  | 60419985  | TC0900000763.mm.1  | 0.1  | 0.694678 |
| TC1400000895.mm.1 | ENSMUST00000179494 | n-R5s20 | nuclear encoded rRNA 5S 209                     | 26959103  | 26959221  | TC0100002103.mm.1  | -0.1 | 0.694683 |
| TC1400000899.mm.1 | XM_003688833       | Gm21129 | predicted gene, 21129                           | 38816997  | 38846884  | TC0700002885.mm.1  | 0.0  | 0.694734 |
| TC1400000903.mm.1 | ENSMUST00000158546 | Gm22430 | predicted gene, 22430                           | 104616865 | 104616971 | TC0X00001049.mm.1  | 0.1  | 0.694834 |
| TC1400000910.mm.1 | ENSMUST00000182773 | Gm7545  | predicted gene 7545                             | 86284887  | 86285894  | TC0600000982.mm.1  | 0.0  | 0.694951 |
| TC1400000912.mm.1 | NM_010558          | Il5     | interleukin 5                                   | 53720794  | 53725106  | TC1100000612.mm.1  | 0.0  | 0.695165 |
| TC1400000926.mm.1 | NR_030469          | Mir669b | microRNA 669b                                   | 114863253 | 115027151 | TC0300001175.mm.1  | -0.2 | 0.695252 |

|                   |                    |          |                                                 |           |           |                    |      |          |
|-------------------|--------------------|----------|-------------------------------------------------|-----------|-----------|--------------------|------|----------|
| TC1400000929.mm.1 | NM_029965          | Rnf170   | ring finger protein 170                         | 26119368  | 26143871  | TC0800000336.mm.1  | 0.0  | 0.695645 |
| TC1400000930.mm.1 | ENSMUST00000102440 | Gm25990  | predicted gene, 25990                           | 82408458  | 82408543  | TC1500000756.mm.1  | 0.0  | 0.69572  |
| TC1400000941.mm.1 | XR_106344          | Gm3510   | predicted gene 3510                             | 15923754  | 15933406  | TC0500001984.mm.1  | -0.1 | 0.695757 |
| TC1400000943.mm.1 | NM_001177550       | Zfp442   | zinc finger protein 442                         | 150407133 | 150451494 | TC0200004837.mm.1  | 0.1  | 0.695898 |
| TC1400000953.mm.1 | ENSMUST00000183743 | mmu-mir  | mmu-mir-3473f                                   | 106546496 | 106546631 | TC0100002895.mm.1  | 0.0  | 0.695912 |
| TC1400000954.mm.1 | NM_001081016       | Zc3h7b   | zinc finger CCH type containing 7B              | 81744848  | 81796269  | TC1500000729.mm.1  | 0.0  | 0.696195 |
| TC1400000961.mm.1 | XM_001476707       | Gm20899  | predicted gene, 20899                           | 38619733  | 38620965  | TC0Y00000126.mm.1  | 0.1  | 0.696303 |
| TC1400000962.mm.1 | ENSMUST00000157576 | Gm23754  | predicted gene, 23754                           | 36205260  | 36205322  | TC1500000264.mm.1  | -0.1 | 0.696402 |
| TC1400000968.mm.1 | NR_002445          | BC00216  | NADH dehydrogenase Fe-S protein 5 pseudogen     | 42955560  | 42956079  | TC1600000620.mm.1  | 0.1  | 0.696605 |
| TC1400000970.mm.1 | NM_147021          | Olfir105 | olfactory receptor 1055                         | 86346724  | 86347764  | TC0200003930.mm.1  | 0.1  | 0.696662 |
| TC1400000975.mm.1 | NM_001159620       | Pigp     | phosphatidylinositol glycan anchor biosynthesis | 94358763  | 94371015  | TC1600002118.mm.1  | 0.0  | 0.696747 |
| TC1400000976.mm.1 | NM_018858          | Pebp1    | phosphatidylethanolamine binding protein 1      | 117282651 | 117287625 | TC0500003126.mm.1  | 0.0  | 0.696811 |
| TC1400000980.mm.1 | ENSMUST00000104208 | Gm24340  | predicted gene, 24340                           | 7350097   | 7350193   | TC0200000067.mm.1  | 0.1  | 0.696817 |
| TC1400000986.mm.1 | NM_026513          | Pdf      | peptide deformylase (mitochondrial)             | 107044698 | 107056737 | TC0800002869.mm.1  | 0.0  | 0.696901 |
| TC1400000997.mm.1 | NM_001253832       | Fibp     | fibroblast growth factor (acidic) intracellular | 5460607   | 5465052   | TC1900000069.mm.1  | 0.0  | 0.696931 |
| TC1400001000.mm.1 | NM_007435          | Abcd1    | ATP-binding cassette, sub-family D (ALD), memb  | 73716597  | 73738535  | TC0X00000691.mm.1  | 0.0  | 0.696982 |
| TC1400001002.mm.1 | NM_001110239       | Acp1     | acid phosphatase 1, soluble                     | 30893326  | 30911612  | TC1200001589.mm.1  | 0.0  | 0.697066 |
| TC1400001012.mm.1 | ENSMUST00000158761 | Gm25989  | predicted gene, 25989                           | 43886682  | 43886814  | TC1600001636.mm.1  | -0.2 | 0.697182 |
| TC1400001022.mm.1 | NM_183021          | Thada    | thyroid adenoma associated                      | 84190056  | 84466208  | TC1700002648.mm.1  | 0.0  | 0.697251 |
| TC1400001035.mm.1 | ENSMUST00000083053 | Gm25260  | predicted gene, 25260                           | 67027043  | 67027176  | TC0600000779.mm.1  | 0.1  | 0.697302 |
| TC1400001039.mm.1 | NM_175427          | Fam163b  | family with sequence similarity 163, member B   | 27110379  | 27142491  | TC0200003212.mm.1  | 0.0  | 0.697474 |
| TC1400001052.mm.1 | NM_024479          | Wbscr27  | Williams Beuren syndrome chromosome region      | 134932368 | 134942637 | TC0500001569.mm.1  | 0.0  | 0.697808 |
| TC1400001062.mm.1 | ENSMUST00000182581 | Gm4335   | predicted gene 4335                             | 93196595  | 93197598  | TC1500000917.mm.1  | 0.1  | 0.698018 |
| TC1400001067.mm.1 | NM_027976          | Acsf5    | acyl-CoA synthetase long-chain family member 5  | 55253369  | 55296628  | TC1900000776.mm.1  | -0.1 | 0.698028 |
| TC1400001085.mm.1 | NM_010483          | Htr5b    | 5-hydroxytryptamine (serotonin) receptor 5B     | 121509758 | 121528465 | TC0100002973.mm.1  | 0.0  | 0.698172 |
| TC1400001090.mm.1 | NM_025887          | Rab5a    | RAB5A, member RAS oncogene family               | 53479234  | 53507680  | TC1700000973.mm.1  | 0.0  | 0.698382 |
| TC1400001094.mm.1 | NM_021300          | Rhox4b   | reproductive homeobox 4B                        | 37432494  | 37437279  | TC0X00003388.mm.1  | 0.0  | 0.69858  |
| TC1400001104.mm.1 | NM_001136090       | Poli     | polymerase (DNA directed), iota                 | 70508680  | 70530620  | TC1800001541.mm.1  | 0.0  | 0.698587 |
| TC1400001105.mm.1 | NM_001252528       | Pqbp1    | polyglutamine binding protein 1                 | 7894519   | 7899269   | TC0X00001784.mm.1  | -0.1 | 0.698629 |
| TC1400001107.mm.1 | NR_037226          | Mir3066  | microRNA 3066                                   | 17355392  | 17355474  | TC1200000141.mm.1  | 0.0  | 0.698673 |
| TC1400001124.mm.1 | ENSMUST00000103764 | Gm24934  | predicted gene, 24934                           | 3781020   | 3781130   | TC0800000024.mm.1  | 0.0  | 0.698675 |
| TC1400001134.mm.1 | ENSMUST00000180354 | Gm23689  | predicted gene, 23689                           | 5223364   | 5223347   | TC1600000046.mm.1  | -0.1 | 0.698871 |
| TC1400001138.mm.1 | ENSMUST00000179270 | Gm26095  | predicted gene, 26095                           | 5227920   | 5228029   | TC1600000047.mm.1  | -0.1 | 0.698871 |
| TC1400001141.mm.1 | uc029tku.1         | fas apo  | Fas mRNA containing retrotransposable element   | 82160342  | 82160436  | TC1700001230.mm.1  | -0.1 | 0.698914 |
| TC1400001145.mm.1 | ENSMUST00000158745 | Gm22140  | predicted gene, 22140                           | 32186129  | 32186248  | TC0800000382.mm.1  | 0.0  | 0.698936 |
| TC1400001146.mm.1 | NM_015820          | Hs6st3   | heparan sulfate 6-O-sulfotransferase 3          | 119138265 | 119869815 | TC1400001293.mm.1  | 0.0  | 0.69912  |
| TC1400001147.mm.1 | ENSMUST00000121452 | Gm4917   | predicted gene 4917                             | 136338065 | 136338714 | TC0X00001326.mm.1  | 0.0  | 0.699217 |
| TC1400001150.mm.1 | NR_035462          | Mir1941  | microRNA 1941                                   | 101369352 | 101369434 | TC1500001072.mm.1  | 0.0  | 0.69928  |
| TC1400001151.mm.1 | ENSMUST00000121379 | Gm11295  | predicted gene 11295                            | 22282353  | 22283548  | TC1300000199.mm.1  | 0.2  | 0.699312 |
| TC1400001153.mm.1 | NM_133218          | Zfp704   | zinc finger protein 704                         | 9427010   | 9610085   | TC0300001626.mm.1  | 0.0  | 0.699372 |
| TC1400001167.mm.1 | ENSMUST00000169362 | Gm3542   | predicted gene 3542                             | 5326255   | 5334928   | TC1400001392.mm.1  | 0.0  | 0.699634 |
| TC1400001174.mm.1 | ENSMUST00000165814 | Gm9603   | predicted gene 9603                             | 5678784   | 5687457   | TC1400001400.mm.1  | 0.0  | 0.699634 |
| TC1400001179.mm.1 | XM_001476781       | Gm3460   | predicted gene 3460                             | 6613967   | 6622418   | TC1400001413.mm.1  | 0.0  | 0.699814 |
| TC1400001189.mm.1 | NM_025996          | Tomm34   | translocase of outer mitochondrial membrane 3-  | 164053540 | 164071169 | TC0200005102.mm.1  | 0.0  | 0.699861 |
| TC1400001194.mm.1 | NM_001109040       | Kif21a   | kinesin family member 21A                       | 90933275  | 91049951  | TC1500002071.mm.1  | 0.0  | 0.70032  |
| TC1400001197.mm.1 | ENSMUST00000182754 | Gm8330   | predicted gene 8330                             | 13890646  | 13891653  | TC1000001780.mm.1  | 0.1  | 0.700334 |
| TC1400001199.mm.1 | NM_019799          | Rhcg     | Rhesus blood group-associated C glycoprotein    | 79593363  | 79617657  | TC0700003564.mm.1  | 0.1  | 0.700383 |
| TC1400001208.mm.1 | NM_021608          | Dctn5    | dynactin 5                                      | 122133041 | 122149044 | TC0700004623.mm.1  | 0.1  | 0.700486 |
| TC1400001226.mm.1 | ENSMUST00000082576 | Gm22458  | predicted gene, 22458                           | 157365998 | 157366104 | TC0300001575.mm.1  | 0.0  | 0.700508 |
| TC1400001230.mm.1 | ENSMUST00000158324 | Gm24931  | predicted gene, 24931                           | 92118177  | 92118283  | TC0500002747.mm.1  | 0.0  | 0.700815 |
| TC1400001231.mm.1 | NM_194444          | Cdk10    | cyclin-dependent kinase 10                      | 123224841 | 123232256 | TC0800001514.mm.1  | 0.0  | 0.701301 |
| TC1400001232.mm.1 | NR_029900          | Mir335   | microRNA 335                                    | 30741299  | 30741396  | TC0600000280.mm.1  | 0.1  | 0.701476 |
| TC1400001234.mm.1 | NM_028022          | Gatsl3   | GATS protein-like 3                             | 4218225   | 4222409   | TC1100000039.mm.1  | 0.1  | 0.701525 |
| TC1400001239.mm.1 | NM_138951          | Ttc36    | tetratricopeptide repeat domain 36              | 44799400  | 44802957  | TC0900002180.mm.1  | 0.1  | 0.701785 |
| TC1400001242.mm.1 | NM_010451          | Hoxa2    | homeobox A2                                     | 52162351  | 52165413  | TC06000003540.mm.1 | 0.0  | 0.701941 |
| TC1400001275.mm.1 | ENSMUST00000179173 | Gm21823  | predicted gene, 21823                           | 79590278  | 79590982  | TC0Y00000488.mm.1  | 0.0  | 0.702115 |
| TC1400001281.mm.1 | ENSMUST00000174981 | Gm23992  | predicted gene, 23992                           | 4371269   | 4371335   | TC0900001693.mm.1  | 0.1  | 0.70212  |
| TC1400001287.mm.1 | NM_146379          | Olfir654 | olfactory receptor 654                          | 104587719 | 104588874 | TC0700001526.mm.1  | -0.1 | 0.702705 |
| TC1400001288.mm.1 | ENSMUST00000184446 | RP23-51  | N/A                                             | 14517971  | 14518670  | TC0700002385.mm.1  | 0.0  | 0.70302  |
| TC1400001290.mm.1 | NM_172777          | Gbp9     | guanylate-binding protein 9                     | 105078394 | 105110292 | TC05000003730.mm.1 | -0.1 | 0.70304  |
| TC1400001293.mm.1 | NR_037302          | Mir3470  | microRNA 3470b                                  | 44013852  | 44013977  | TC1600000649.mm.1  | 0.1  | 0.703254 |
| TC1400001306.mm.1 | XM_001002281       | Gm6866   | predicted gene 6866                             | 41210165  | 41219259  | TC0700000724.mm.1  | 0.0  | 0.703389 |
| TC1400001312.mm.1 | ENSMUST00000178891 | Gm21885  | predicted gene, 21885                           | 94284652  | 94285985  | TC1100001431.mm.1  | 0.0  | 0.703503 |
| TC1400001315.mm.1 | NM_001099312       | Gm11569  | predicted gene 11569                            | 99798064  | 99809896  | TC1100003738.mm.1  | -0.1 | 0.703694 |
| TC1400001321.mm.1 | NM_026812          | Hddc3    | HD domain containing 3                          | 80343124  | 80346097  | TC0700001152.mm.1  | 0.0  | 0.703733 |
| TC1400001327.mm.1 | NR_030703          | Snord10  | small nucleolar RNA, C/D box 104                | 106500991 | 106501063 | TC1100001783.mm.1  | -0.2 | 0.70385  |
| TC1400001328.mm.1 | ENSMUST00000052072 | Tmem221  | transmembrane protein 221                       | 71554303  | 71558871  | TC0800002432.mm.1  | 0.0  | 0.704086 |
| TC1400001331.mm.1 | ENSMUST00000102019 | n-R5s64  | nuclear encoded rRNA 5S 64                      | 85718477  | 85718595  | TC1200002099.mm.1  | -0.1 | 0.704513 |
| TC1400001346.mm.1 | ENSMUST00000083359 | Gm26124  | predicted gene, 26124                           | 76111197  | 76111304  | TC1700002542.mm.1  | -0.1 | 0.704559 |
| TC1400001350.mm.1 | ENSMUST00000082835 | Gm23518  | predicted gene, 23518                           | 35387933  | 35388085  | TC1600001547.mm.1  | 0.0  | 0.704575 |
| TC1400001355.mm.1 | ENSMUST00000158118 | Gm23221  | predicted gene, 23221                           | 62020594  | 62020686  | TC0900000781.mm.1  | 0.1  | 0.704762 |
| TC1400001359.mm.1 | NM_029389          | Fam35a   | family with sequence similarity 35, member A    | 34237033  | 34310503  | TC1400001723.mm.1  | 0.0  | 0.704873 |
| TC1400001360.mm.1 | NM_001178059       | Txnrd3   | thioredoxin reductase 3                         | 89643988  | 89675529  | TC0600001051.mm.1  | 0.0  | 0.704887 |
| TC1400001363.mm.1 | ENSMUST00000104464 | Gm23322  | predicted gene, 23322                           | 109009681 | 109009847 | TC0X00002854.mm.1  | -0.1 | 0.704983 |
| TC1400001364.mm.1 | NR_027984          | 2810025  | RIKEN cDNA 2810025M15 gene                      | 157412352 | 157420236 | TC0100001431.mm.1  | 0.0  | 0.704995 |
| TC1400001368.mm.1 | NM_026757          | 610010   | RIKEN cDNA 0610010K14 gene                      | 70235204  | 70239852  | TC1100003089.mm.1  | 0.0  | 0.705301 |
| TC1400001370.mm.1 | ENSMUST00000050255 | Olfir125 | olfactory receptor 125                          | 37834911  | 37836028  | TC1700000786.mm.1  | 0.0  | 0.705341 |
| TC1400001379.mm.1 | NM_027861          | Brox     | BRO1 domain and CAAX motif containing           | 183276342 | 183297256 | TC0100003723.mm.1  | 0.0  | 0.705755 |

|                   |                    |         |                                                 |           |           |                   |      |          |
|-------------------|--------------------|---------|-------------------------------------------------|-----------|-----------|-------------------|------|----------|
| TC1400001384.mm.1 | NM_029001          | Elov17  | ELOVL family member 7, elongation of long chain | 108214404 | 108287109 | TC1300001204.mm.1 | -0.1 | 0.705969 |
| TC1400001388.mm.1 | ENSMUST00000157500 | Gm26070 | predicted gene, 26070                           | 35214401  | 35214537  | TC1100000375.mm.1 | 0.0  | 0.706096 |
| TC1400001392.mm.1 | NM_019873          | Fkbp1   | FK506 binding protein-like                      | 34644764  | 34646327  | TC1700000642.mm.1 | 0.0  | 0.706335 |
| TC1400001394.mm.1 | ENSMUST00000157379 | Gm24786 | predicted gene, 24786                           | 9829620   | 9829728   | TC0300001632.mm.1 | -0.1 | 0.706342 |
| TC1400001397.mm.1 | NM_145139          | Eif3l   | eukaryotic translation initiation factor 3, sub | 79075223  | 79094400  | TC1500000665.mm.1 | -0.1 | 0.706557 |
| TC1400001398.mm.1 | ENSMUST00000119676 | Gm11442 | predicted gene 11442                            | 85216597  | 85217054  | TC1100001289.mm.1 | 0.0  | 0.706594 |
| TC1400001399.mm.1 | NM_011905          | Tlr2    | toll-like receptor 2                            | 83836272  | 83841767  | TC0300002236.mm.1 | 0.0  | 0.706836 |
| TC1400001400.mm.1 | NM_001195091       | Gm6537  | predicted gene 6537                             | 28756174  | 28758965  | TC0700000510.mm.1 | 0.0  | 0.706854 |
| TC1400001402.mm.1 | ENSMUST00000158774 | Gm23312 | predicted gene, 23312                           | 9758839   | 9758940   | TC0500001947.mm.1 | 0.1  | 0.707032 |
| TC1400001404.mm.1 | ENSMUST00000155424 | Gm16218 | predicted gene 16218                            | 65297532  | 65297919  | TC0900002508.mm.1 | 0.0  | 0.707561 |
| TC1400001407.mm.1 | NR_037294          | Mir3074 | microRNA 3074-2                                 | 84208825  | 84208907  | TC0800002576.mm.1 | 0.0  | 0.707673 |
| TC1400001408.mm.1 | NM_052994          | Spock2  | sparc/osteonectin, cwcv and kazal-like domains  | 60106219  | 60135198  | TC1000000543.mm.1 | 0.0  | 0.707692 |
| TC1400001409.mm.1 | NM_008370          | Il5ra   | interleukin 5 receptor, alpha                   | 106710375 | 106749037 | TC0600002877.mm.1 | -0.1 | 0.707838 |
| TC1400001410.mm.1 | NR_033509          | Gm9961  | predicted gene 9961                             | 11901363  | 11930600  | TC1600000142.mm.1 | 0.0  | 0.707846 |
| TC1400001411.mm.1 | ENSMUST00000158580 | Gm24577 | predicted gene, 24577                           | 101005821 | 101005883 | TC0X00000964.mm.1 | 0.0  | 0.708138 |
| TC1400001412.mm.1 | ENSMUST00000179610 | Gm26443 | predicted gene, 26443                           | 33808117  | 33808226  | TC0700000621.mm.1 | 0.0  | 0.708154 |
| TC1400001413.mm.1 | ENSMUST00000173278 | Gm8750  | predicted pseudogene 8750                       | 35400799  | 35403727  | TC1700000686.mm.1 | 0.0  | 0.708234 |
| TC1400001415.mm.1 | ENSMUST00000158148 | Gm26041 | predicted gene, 26041                           | 76788422  | 76788529  | TC0X00002495.mm.1 | 0.0  | 0.70825  |
| TC1400001416.mm.1 | NM_016892          | Ccs     | copper chaperone for superoxide dismutase       | 4825366   | 4839322   | TC1900000937.mm.1 | 0.0  | 0.708365 |
| TC1400001418.mm.1 | NM_023463          | Ly6g6c  | lymphocyte antigen 6 complex, locus G6C         | 35067325  | 35070050  | TC1700002786.mm.1 | 0.0  | 0.708499 |
| TC1400001419.mm.1 | ENSMUST00000079237 | Zfp125  | zinc finger protein 125                         | 20899822  | 20900867  | TC1200001485.mm.1 | 0.1  | 0.708525 |
| TC1400001420.mm.1 | NM_011986          | Ncdn    | neurochondrin                                   | 126743750 | 126753438 | TC0400003549.mm.1 | 0.0  | 0.708738 |
| TC1400001421.mm.1 | ENSMUST00000082646 | Gm25134 | predicted gene, 25134                           | 19242130  | 19242289  | TC0700000294.mm.1 | -0.1 | 0.708922 |
| TC1400001422.mm.1 | ENSMUST00000171469 | LOC1010 | putative E3 ubiquitin-protein ligase UNKL-like  | 8694077   | 8694541   | TC1800000059.mm.1 | 0.0  | 0.709043 |
| TC1400001425.mm.1 | XR_105836          | Gm19450 | predicted gene, 19450                           | 34099929  | 34109826  | TC1700000615.mm.1 | 0.0  | 0.709167 |
| TC1400001427.mm.1 | NM_001037756       | Brms1l  | breast cancer metastasis-suppressor 1-like      | 55836366  | 55869736  | TC1200000474.mm.1 | 0.0  | 0.709177 |
| TC1400001428.mm.1 | ENSMUST00000118418 | Gm14941 | predicted gene 14941                            | 122359447 | 122359890 | TC0X00001196.mm.1 | 0.1  | 0.709366 |
| TC1400001429.mm.1 | ENSMUST00000117535 | Gm14365 | predicted gene 14365                            | 5193483   | 5194069   | TC0X00000035.mm.1 | 0.0  | 0.709543 |
| TC1400001436.mm.1 | NM_153559          | Qsox2   | quiescin Q6 sulfhydryl oxidase 2                | 26208637  | 26237525  | TC0200003182.mm.1 | 0.0  | 0.709589 |
| TC1400001442.mm.1 | NM_023348          | Snap29  | synaptosomal-associated protein 29              | 17406000  | 17430826  | TC1600000215.mm.1 | 0.1  | 0.709592 |
| TC1400001445.mm.1 | ENSMUST00000117720 | Gm16205 | predicted gene 16205                            | 37787666  | 37788692  | TC0800002089.mm.1 | 0.0  | 0.70991  |
| TC1400001451.mm.1 | NM_027066          | Tmem89  | transmembrane protein 89                        | 108914619 | 108915563 | TC0900001426.mm.1 | 0.0  | 0.710123 |
| TC1400001454.mm.1 | NR_028481          | Snora31 | small nucleolar RNA, H/ACA box 31               | 75847905  | 75848034  | TC1400001062.mm.1 | -0.2 | 0.710262 |
| TC1400001455.mm.1 | NM_027935          | Tmem50a | transmembrane protein 50A                       | 134897849 | 134915024 | TC0400003749.mm.1 | 0.1  | 0.710304 |
| TC1400001465.mm.1 | NM_010217          | Ctgf    | connective tissue growth factor                 | 24595442  | 24598683  | TC1000000215.mm.1 | 0.0  | 0.710306 |
| TC1400001468.mm.1 | NM_001012335       | Mdk     | midkine                                         | 91929805  | 91932297  | TC0X00004129.mm.1 | 0.0  | 0.710425 |
| TC1400001470.mm.1 | NM_019586          | Ube2j1  | ubiquitin-conjugating enzyme E2J 1              | 33031416  | 33052364  | TC0400000277.mm.1 | 0.0  | 0.710697 |
| TC1400001471.mm.1 | ENSMUST00000180292 | Gm21920 | predicted gene, 21920                           | 53712736  | 53713418  | TC0Y00000377.mm.1 | 0.0  | 0.710733 |
| TC1400001472.mm.1 | NM_197998          | Cdcpf1  | cysteine rich, DPF motif domain containing 1    | 85806972  | 85811697  | TC1500002007.mm.1 | 0.0  | 0.710748 |
| TC1400001486.mm.1 | NM_146784          | Olfr916 | olfactory receptor 916                          | 38657458  | 38658390  | TC0900002061.mm.1 | 0.0  | 0.710864 |
| TC1400001499.mm.1 | NM_001025607       | Gm5168  | predicted gene 5168                             | 26028214  | 26051041  | TC0X00001978.mm.1 | 0.0  | 0.710876 |
| TC1400001500.mm.1 | NM_013731          | Sgk2    | serum/glucocorticoid regulated kinase 2         | 162987330 | 163014127 | TC0200002476.mm.1 | 0.0  | 0.710999 |
| TC1400001514.mm.1 | NCBI_Gene:777688:p | Ighv5-4 | immunoglobulin heavy variable 5-4               | 113597446 | 113597905 | TC1200002556.mm.1 | -0.2 | 0.71133  |
| TC1400001516.mm.1 | NM_023124          | H2-Q8   | histocompatibility 2, Q region locus 8          | 35424847  | 35430055  | TC1700002788.mm.1 | -0.1 | 0.711334 |
| TC1400001519.mm.1 | NM_026116          | Bbs2    | Bardet-Biedl syndrome 2 (human)                 | 94067954  | 94098811  | TC0800002725.mm.1 | 0.0  | 0.711401 |
| TC1400001523.mm.1 | ENSMUST00000157569 | Gm23900 | predicted gene, 23900                           | 81543235  | 81543342  | TC0200003848.mm.1 | 0.0  | 0.711567 |
| TC1400001528.mm.1 | ENSMUST00000083312 | Gm22297 | predicted gene, 22297                           | 70996539  | 70996644  | TC1100003120.mm.1 | 0.1  | 0.711641 |
| TC1400001533.mm.1 | NR_035461          | Mir1940 | microRNA 1940                                   | 95330580  | 95330737  | TC1300001076.mm.1 | 0.2  | 0.712127 |
| TC1400001535.mm.1 | ENSMUST00000083877 | Gm24695 | predicted gene, 24695                           | 91349702  | 91349784  | TC1600002073.mm.1 | -0.1 | 0.712233 |
| TC1400001544.mm.1 | NM_001143689       | H2-Q4   | histocompatibility 2, Q region locus 4          | 35379617  | 35385290  | TC1700000684.mm.1 | -0.1 | 0.712424 |
| TC1400001550.mm.1 | NM_007620          | Cbr1    | carbonyl reductase 1                            | 93607837  | 93610505  | TC1600001042.mm.1 | 0.1  | 0.712551 |
| TC1400001551.mm.1 | NR_037269          | Mir466n | microRNA 466n                                   | 114344526 | 114749749 | TC1100004045.mm.1 | 0.0  | 0.712582 |
| TC1400001561.mm.1 | ENSMUST00000104557 | Gm26342 | predicted gene, 26342                           | 67257224  | 67257352  | TC0100000574.mm.1 | 0.0  | 0.712764 |
| TC1400001565.mm.1 | ENSMUST00000157339 | Gm25388 | predicted gene, 25388                           | 57653672  | 57653822  | TC0200003569.mm.1 | -0.1 | 0.712834 |
| TC1400001573.mm.1 | XR_141356          | A730085 | RIKEN cDNA A730085E03 gene                      | 69198064  | 69199000  | TC1800000738.mm.1 | 0.0  | 0.712857 |
| TC1400001579.mm.1 | NM_024270          | Stard3n | STARD3 N-terminal like                          | 19357676  | 19395752  | TC1300001520.mm.1 | 0.0  | 0.713243 |
| TC1400001605.mm.1 | NM_008539          | Smad1   | SMAD family member 1                            | 79338395  | 79399518  | TC0800002518.mm.1 | 0.0  | 0.713275 |
| TC1400001608.mm.1 | XR_140480          | Gm21710 | predicted gene, 21710                           | 187215508 | 187351704 | TC0100001804.mm.1 | 0.0  | 0.713405 |
| TC1400001630.mm.1 | XM_001476676       | Gm3278  | predicted gene 3278                             | 4892416   | 4902431   | TC1400000034.mm.1 | 0.0  | 0.713437 |
| TC1400001634.mm.1 | ENSMUST00000118918 | Gm11907 | predicted gene 11907                            | 28353783  | 28354789  | TC0400000227.mm.1 | 0.0  | 0.713683 |
| TC1400001645.mm.1 | NM_024274          | Fars2   | phenylalanine-tRNA synthetase 2 (mitochondrial  | 36117411  | 36537595  | TC1300000409.mm.1 | 0.0  | 0.713765 |
| TC1400001655.mm.1 | NM_025316          | Ndufb5  | NADH dehydrogenase (ubiquinone) 1 beta subcc    | 32736990  | 32751566  | TC0300000227.mm.1 | 0.0  | 0.713951 |
| TC1400001666.mm.1 | XM_003084997       | Gm3173  | predicted gene 3173                             | 4415448   | 4519621   | TC1400002791.mm.1 | 0.0  | 0.714067 |
| TC1400001667.mm.1 | NM_178216          | Hist2h3 | histone cluster 2, H3c1                         | 96246685  | 96248509  | TC0300003216.mm.1 | -0.1 | 0.714259 |
| TC1400001668.mm.1 | NM_133759          | Zbtb3   | zinc finger and BTB domain containing 3         | 8802496   | 8804854   | TC1900000158.mm.1 | 0.0  | 0.714377 |
| TC1400001676.mm.1 | ENSMUST00000177988 | mmu-mir | mmu-mir-466b-1 // mmu-mir-466b-4 // mmu-n       | 10474215  | 10474304  | TC0200000105.mm.1 | 0.0  | 0.714479 |
| TC1400001699.mm.1 | ENSMUST00000178801 | mmu-mir | mmu-mir-466b-1 // mmu-mir-466b-4 // mmu-n       | 10486423  | 10486512  | TC0200000132.mm.1 | 0.0  | 0.714479 |
| TC1400001708.mm.1 | ENSMUST00000103900 | mmu-mir | mmu-mir-466b-1 // mmu-mir-466b-5 // mmu-n       | 10488887  | 10488974  | TC0200000138.mm.1 | 0.0  | 0.714479 |
| TC1400001709.mm.1 | ENSMUST00000180061 | mmu-mir | mmu-mir-466b-1 // mmu-mir-466b-4 // mmu-n       | 10493798  | 10493887  | TC0200000150.mm.1 | 0.0  | 0.714479 |
| TC1400001723.mm.1 | ENSMUST00000103804 | mmu-mir | mmu-mir-466b-1 // mmu-mir-466b-5 // mmu-n       | 10496268  | 10496355  | TC0200000156.mm.1 | 0.0  | 0.714479 |
| TC1400001724.mm.1 | ENSMUST00000103791 | mmu-mir | mmu-mir-466b-1 // mmu-mir-466b-4 // mmu-n       | 10501109  | 10501198  | TC0200000168.mm.1 | 0.0  | 0.714479 |
| TC1400001725.mm.1 | ENSMUST00000175235 | Gm24710 | predicted gene, 24710                           | 37931680  | 37931780  | TC1000000317.mm.1 | 0.1  | 0.714583 |
| TC1400001733.mm.1 | ENSMUST00000179085 | Gm24135 | predicted gene, 24135                           | 12572430  | 12572530  | TC1500001230.mm.1 | 0.1  | 0.714583 |
| TC1400001740.mm.1 | NM_019519          | Rabgta  | Rab geranylgeranyl transferase, a subunit       | 55715873  | 55722257  | TC1400002099.mm.1 | 0.0  | 0.714712 |
| TC1400001748.mm.1 | ENSMUST00000121650 | Gm5395  | predicted gene 5395                             | 151655188 | 151656102 | TC0X00001523.mm.1 | 0.0  | 0.714808 |
| TC1400001759.mm.1 | ENSMUST00000121314 | Gm6031  | predicted gene 6031                             | 15426151  | 15427204  | TC1600000189.mm.1 | 0.0  | 0.714923 |
| TC1400001775.mm.1 | XM_003085238       | Gm19956 | predicted gene, 19956                           | 59661329  | 59681210  | TC1900000857.mm.1 | 0.0  | 0.715155 |
| TC1400001779.mm.1 | ENSMUST00000117792 | Gm15069 | predicted gene 15069                            | 170746836 | 170747207 | TC0X00003382.mm.1 | 0.0  | 0.715226 |

|                   |                    |         |                                                 |            |           |                   |      |          |
|-------------------|--------------------|---------|-------------------------------------------------|------------|-----------|-------------------|------|----------|
| TC1400001784.mm.1 | ENSMUST00000119796 | Gm15068 | predicted gene 15068                            | 170869589  | 170869960 | TC0X00003383.mm.1 | 0.0  | 0.715226 |
| TC1400001797.mm.1 | ENSMUST00000117259 | Pdxd2-r | peroxiredoxin 2, related sequence 3             | 144791837  | 144792660 | TC0400001855.mm.1 | 0.0  | 0.715262 |
| TC1400001807.mm.1 | NM_153129          | Prx1    | phosphorurin acidic cluster sorting protein 1   | 5133685    | 5273119   | TC1900000954.mm.1 | 0.0  | 0.715328 |
| TC1400001810.mm.1 | NM_024459          | Ppp3r1  | protein phosphatase 3, regulatory subunit B, al | 17151139   | 17200380  | TC1100004261.mm.1 | 0.0  | 0.715394 |
| TC1400001812.mm.1 | NR_035468          | Mir1946 | microRNA 1946a                                  | 32267450   | 32267583  | TC1600001505.mm.1 | 0.0  | 0.7155   |
| TC1400001819.mm.1 | ENSMUST00000158266 | Gm22516 | predicted gene, 22516                           | 31189691   | 31189814  | TC0200000548.mm.1 | 0.0  | 0.715595 |
| TC1400001825.mm.1 | NM_010499          | Ier2    | immediate early response 2                      | 84661331   | 84662852  | TC0800002585.mm.1 | 0.0  | 0.71593  |
| TC1400001826.mm.1 | NR_030447          | Mir680- | microRNA 680-1                                  | 129691535  | 129691643 | TC0600001539.mm.1 | 0.0  | 0.715972 |
| TC1400001827.mm.1 | ENSMUST00000179342 | Gm23305 | predicted gene, 23305                           | 59537128   | 59537206  | TC0700003226.mm.1 | 0.0  | 0.716127 |
| TC1400001835.mm.1 | ENSMUST00000180298 | Gm25085 | predicted gene, 25085                           | 59540870   | 59540948  | TC0700003228.mm.1 | 0.0  | 0.716127 |
| TC1400001836.mm.1 | ENSMUST00000082662 | Gm22298 | predicted gene, 22298                           | 54100430   | 54100562  | TC0200000847.mm.1 | 0.0  | 0.716128 |
| TC1400001837.mm.1 | ENSMUST00000116977 | Gm22677 | predicted gene, 22677                           | 10465760   | 10465867  | TC0200000089.mm.1 | 0.0  | 0.716465 |
| TC1400001849.mm.1 | NM_026526          | N6amt2  | N-6 adenine-specific DNA methyltransferase 2 (p | 57549596   | 57571569  | TC1400002146.mm.1 | -0.1 | 0.716466 |
| TC1400001857.mm.1 | NM_009838          | Cct6a   | chaperonin containing Tcp1, subunit 6a (zeta)   | 129787356  | 129846443 | TC0500001512.mm.1 | -0.1 | 0.716467 |
| TC1400001858.mm.1 | NM_008533          | Cd180   | CD180 antigen                                   | 102693558  | 102739629 | TC1300001155.mm.1 | 0.2  | 0.716527 |
| TC1400001860.mm.1 | NM_013650          | S100a8  | S100 calcium binding protein A8 (calgranulin A) | 90669071   | 90670034  | TC0300000811.mm.1 | 0.1  | 0.716531 |
| TC1400001868.mm.1 | ENSMUST00000121454 | Gm12161 | predicted gene 12161                            | 45280594   | 45280954  | TC1100002586.mm.1 | 0.0  | 0.716572 |
| TC1400001893.mm.1 | XR_106321          | Srsy    | serine-rich, secreted, Y-linked                 | 17935713   | 17937330  | TC0Y00000277.mm.1 | 0.0  | 0.716708 |
| TC1400001898.mm.1 | NM_026774          | Lamtor5 | late endosomal/lysosomal adaptor, MAPK and N    | 107278858  | 107284082 | TC0300001116.mm.1 | 0.0  | 0.716885 |
| TC1400001901.mm.1 | NM_146200          | Eif3c   | eukaryotic translation initiation factor 3, sub | 126546455  | 126566411 | TC0700004282.mm.1 | -0.1 | 0.717005 |
| TC1400001910.mm.1 | ENSMUST00000103776 | Gm23252 | predicted gene, 23252                           | 129582786  | 129582895 | TC1000003182.mm.1 | 0.0  | 0.71712  |
| TC1400001920.mm.1 | ENSMUST00000178214 | Gm23953 | predicted gene, 23953                           | 59736313   | 59736406  | TC0700003293.mm.1 | 0.1  | 0.717134 |
| TC1400001931.mm.1 | ENSMUST00000179813 | Gm26332 | predicted gene, 26332                           | 59738848   | 59738941  | TC0700003294.mm.1 | 0.1  | 0.717134 |
| TC1400001933.mm.1 | ENSMUST00000180265 | Gm22863 | predicted gene, 22863                           | 59743912   | 59744005  | TC0700003296.mm.1 | 0.1  | 0.717134 |
| TC1400001937.mm.1 | ENSMUST00000177718 | Gm24618 | predicted gene, 24618                           | 59746425   | 59746518  | TC0700003297.mm.1 | 0.1  | 0.717134 |
| TC1400001942.mm.1 | ENSMUST00000083343 | Gm25126 | predicted gene, 25126                           | 37317477   | 37317578  | TC0800002086.mm.1 | 0.1  | 0.717213 |
| TC1400001945.mm.1 | ENSMUST00000114890 | Gm17604 | predicted gene, 17604                           | 1650003765 | 165004829 | TC0X00003337.mm.1 | -0.1 | 0.717216 |
| TC1400001950.mm.1 | NR_035416          | Mir669j | microRNA 669j                                   | 10477910   | 10478030  | TC0200000114.mm.1 | 0.0  | 0.717223 |
| TC1400001955.mm.1 | ENSMUST00000102422 | Gm22370 | predicted gene, 22370                           | 28214039   | 28214121  | TC1000001926.mm.1 | 0.0  | 0.717255 |
| TC1400001960.mm.1 | NM_001270812       | LOC1008 | alpha takusan-like                              | 6259747    | 6287250   | TC1400002843.mm.1 | 0.0  | 0.717308 |
| TC1400001962.mm.1 | NM_013676          | Supt5   | suppressor of Ty 5                              | 28314894   | 28338719  | TC0700002694.mm.1 | -0.1 | 0.717383 |
| TC1400001963.mm.1 | NM_177271          | Samd5   | sterile alpha motif domain containing 5         | 9627259    | 9675208   | TC1000001735.mm.1 | 0.0  | 0.71747  |
| TC1400001972.mm.1 | NM_011439          | Sox13   | SRY-box containing gene 13                      | 133382300  | 133424377 | TC0100003090.mm.1 | 0.0  | 0.71766  |
| TC1400001981.mm.1 | ENSMUST00000182989 | Gm4691  | predicted gene 4691                             | 128202013  | 128203276 | TC0600003195.mm.1 | 0.1  | 0.717738 |
| TC1400001984.mm.1 | ENSMUST00000104088 | Gm22784 | predicted gene, 22784                           | 55956782   | 55956913  | TC0300002007.mm.1 | 0.0  | 0.717882 |
| TC1400001988.mm.1 | ENSMUST00000179862 | LOC6376 | regulator complex protein LAMTOR3-like // late  | 104949176  | 104950441 | TC0X00003960.mm.1 | 0.0  | 0.717923 |
| TC1400001993.mm.1 | NM_133783          | Ptges2  | prostaglandin E synthase 2                      | 32395890   | 32402740  | TC0200000578.mm.1 | 0.0  | 0.7181   |
| TC1400001995.mm.1 | ENSMUST00000175495 | Gm24108 | predicted gene, 24108                           | 30261441   | 30261517  | TC1900001357.mm.1 | -0.1 | 0.718248 |
| TC1400002001.mm.1 | NM_175244          | Hectd3  | HECT domain containing 3                        | 116995317  | 117005277 | TC0400001273.mm.1 | 0.0  | 0.718351 |
| TC1400002002.mm.1 | XR_141500          | Gm9783  | predicted gene 9783                             | 5845623    | 5853036   | TC1900000089.mm.1 | 0.0  | 0.718578 |
| TC1400002004.mm.1 | NM_001100614       | Gm11564 | predicted gene 11564                            | 99814976   | 99815666  | TC1100003740.mm.1 | 0.0  | 0.718595 |
| TC1400002017.mm.1 | XR_106483          | A230087 | RIKEN cDNA A230087F16 gene                      | 111284759  | 111293988 | TC1200001234.mm.1 | 0.0  | 0.718747 |
| TC1400002028.mm.1 | ENSMUST00000157157 | Gm23169 | predicted gene, 23169                           | 13334498   | 13334609  | TC0100001975.mm.1 | 0.1  | 0.71876  |
| TC1400002041.mm.1 | NM_026241          | Ankrd39 | ankyrin repeat domain 39                        | 36538173   | 36547231  | TC0100003875.mm.1 | 0.0  | 0.719307 |
| TC1400002043.mm.1 | NM_007545          | Hrk     | harakiri, BCL2 interacting protein (contains on | 118164648  | 118189478 | TC0500001307.mm.1 | 0.0  | 0.719418 |
| TC1400002049.mm.1 | ENSMUST00000179983 | Gm21728 | predicted gene, 21728                           | 82093823   | 82094505  | TC0Y0000503.mm.1  | 0.0  | 0.719615 |
| TC1400002050.mm.1 | NM_001145935       | Zfp691  | zinc finger protein 691                         | 119169513  | 119174195 | TC0400003417.mm.1 | 0.0  | 0.719723 |
| TC1400002054.mm.1 | NM_007812          | Cyp2a5  | cytochrome P450, family 2, subfamily a, polypep | 26835305   | 26843548  | TC0700000445.mm.1 | 0.1  | 0.719731 |
| TC1400002056.mm.1 | ENSMUST00000119771 | Gm11198 | predicted gene 11198                            | 79371257   | 79372230  | TC1100003321.mm.1 | 0.0  | 0.719862 |
| TC1400002058.mm.1 | ENSMUST00000158181 | Gm23513 | predicted gene, 23513                           | 52105015   | 52105147  | TC1600001719.mm.1 | -0.1 | 0.720045 |
| TC1400002059.mm.1 | ENSMUST00000158480 | Gm23115 | predicted gene, 23115                           | 71506436   | 71506543  | TC1700002498.mm.1 | 0.0  | 0.720083 |
| TC1400002060.mm.1 | XM_001475423       | Gm20862 | predicted gene, 20862                           | 83789754   | 83927911  | TC0Y00000565.mm.1 | 0.0  | 0.720089 |
| TC1400002061.mm.1 | NM_001163284       | Zbtb5   | zinc finger and BTB domain containing 5         | 44991242   | 45012412  | TC0400002568.mm.1 | 0.0  | 0.720124 |
| TC1400002067.mm.1 | ENSMUST00000175171 | Gm24086 | predicted gene, 24086                           | 136697374  | 136697471 | TC0100001277.mm.1 | 0.0  | 0.720222 |
| TC1400002071.mm.1 | ENSMUST00000157123 | Gm25154 | predicted gene, 25154                           | 65136302   | 65136420  | TC0500000606.mm.1 | -0.1 | 0.720251 |
| TC1400002082.mm.1 | XM_484312          | Gm5454  | predicted gene 5454                             | 103356250  | 103357704 | TC1300001159.mm.1 | 0.0  | 0.720552 |
| TC1400002083.mm.1 | ENSMUST00000163135 | Gm17068 | predicted gene 17068                            | 16277797   | 16278776  | TC1900000304.mm.1 | 0.0  | 0.720577 |
| TC1400002093.mm.1 | ENSMUST00000180100 | Gm10097 | predicted gene 10097                            | 5069192    | 5071975   | TC1000000031.mm.1 | 0.0  | 0.720596 |
| TC1400002094.mm.1 | ENSMUST00000157734 | Gm24009 | predicted gene, 24009                           | 23674289   | 23674381  | TC0500002056.mm.1 | 0.0  | 0.720628 |
| TC1400002098.mm.1 | ENSMUST00000178682 | Gm23141 | predicted gene, 23141                           | 59705968   | 59706061  | TC0700003281.mm.1 | 0.1  | 0.720692 |
| TC1400002099.mm.1 | NM_001105557       | Zfp938  | zinc finger protein 938                         | 82224850   | 82241280  | TC1000002562.mm.1 | 0.0  | 0.720767 |
| TC1400002100.mm.1 | ENSMUST00000086960 | Gm10198 | predicted gene 10198                            | 111592785  | 111592856 | TC1300001251.mm.1 | 0.0  | 0.720772 |
| TC1400002101.mm.1 | NM_001033041       | Acmsd   | amino carboxymuconate semialdehyde decarbo:     | 127729413  | 127767564 | TC0100001123.mm.1 | 0.1  | 0.720912 |
| TC1400002102.mm.1 | NR_035484          | Mir1958 | microRNA 1958                                   | 63980973   | 63984483  | TC0100002460.mm.1 | 0.1  | 0.721172 |
| TC1400002103.mm.1 | ENSMUST00000076364 | Gm5621  | predicted gene 5621 // ribosomal protein L10    | 50344240   | 50344981  | TC0900000263.mm.1 | -0.1 | 0.721204 |
| TC1400002106.mm.1 | NM_008117          | Gh      | growth hormone                                  | 106300261  | 106301896 | TC1100003919.mm.1 | 0.0  | 0.72146  |
| TC1400002108.mm.1 | ENSMUST00000122608 | Gm25279 | predicted gene, 25279                           | 151854823  | 151854955 | TC0100003259.mm.1 | 0.0  | 0.721482 |
| TC1400002112.mm.1 | NM_009265          | Spr1b   | small proline-rich protein 1B                   | 92436809   | 92438779  | TC0300002391.mm.1 | 0.0  | 0.721526 |
| TC1400002122.mm.1 | ENSMUST00000181173 | GAPDH   | ---                                             | 11280735   | 11356726  | TC1400001451.mm.1 | 0.0  | 0.721557 |
| TC1400002131.mm.1 | ENSMUST00000104994 | Gm17374 | predicted gene, 17374                           | 140152043  | 140153532 | TC0200002094.mm.1 | -0.1 | 0.721812 |
| TC1400002134.mm.1 | NM_030254          | Tusc3   | tumor suppressor candidate 3                    | 39005867   | 39167041  | TC0800000463.mm.1 | 0.0  | 0.721916 |
| TC1400002136.mm.1 | ENSMUST00000178417 | Gm24463 | predicted gene, 24463                           | 89075336   | 89075407  | TC0900001144.mm.1 | 0.2  | 0.721916 |
| TC1400002142.mm.1 | ENSMUST00000104254 | Gm23132 | predicted gene, 23132                           | 77658576   | 77658707  | TC1100003272.mm.1 | 0.1  | 0.721929 |
| TC1400002144.mm.1 | ENSMUST00000158214 | Gm23541 | predicted gene, 23541                           | 101005896  | 101005959 | TC0X00000965.mm.1 | 0.1  | 0.721982 |
| TC1400002146.mm.1 | ENSMUST00000119602 | Hspa9-p | heat shock protein 9, pseudogene 1              | 60576946   | 60578878  | TC0X00002313.mm.1 | 0.0  | 0.722354 |
| TC1400002150.mm.1 | NM_026519          | Emc4    | ER membrane protein complex subunit 4           | 112363011  | 112368027 | TC0200004352.mm.1 | 0.0  | 0.722442 |
| TC1400002152.mm.1 | NM_177321          | Mia2    | melanoma inhibitory activity 2                  | 59095799   | 59109130  | TC1200000502.mm.1 | 0.1  | 0.722653 |
| TC1400002154.mm.1 | ENSMUST00000158964 | Gm23343 | predicted gene, 23343                           | 44948104   | 44948246  | TC1500000358.mm.1 | 0.0  | 0.722692 |

|                   |                    |         |                                                 |           |           |                    |      |          |
|-------------------|--------------------|---------|-------------------------------------------------|-----------|-----------|--------------------|------|----------|
| TC1400002160.mm.1 | NM_146796          | Olfr149 | olfactory receptor 1499                         | 13814607  | 13815658  | TC1900001188.mm.1  | 0.0  | 0.722906 |
| TC1400002161.mm.1 | ENSMUST00000158632 | Gm25718 | predicted gene, 25718                           | 81026773  | 81026890  | TC1800000858.mm.1  | 0.1  | 0.723115 |
| TC1400002162.mm.1 | NM_147098          | Olfr630 | olfactory receptor 630                          | 103754150 | 103757350 | TC0700003904.mm.1  | 0.0  | 0.723148 |
| TC1400002165.mm.1 | ENSMUST00000082657 | Gm22302 | predicted gene, 22302                           | 37824242  | 37824347  | TC0700002872.mm.1  | -0.1 | 0.72317  |
| TC1400002170.mm.1 | NM_001166031       | Mrps2   | mitochondrial ribosomal protein S2              | 28467961  | 28471178  | TC0200000482.mm.1  | 0.0  | 0.723401 |
| TC1400002189.mm.1 | NM_011577          | Tgfb1   | transforming growth factor, beta 1              | 25687002  | 25705077  | TC0700000424.mm.1  | -0.1 | 0.723731 |
| TC1400002193.mm.1 | NM_008134          | Glycam1 | glycosylation dependent cell adhesion molecule  | 103562760 | 103565081 | TC1500002324.mm.1  | 0.0  | 0.723933 |
| TC1400002197.mm.1 | NM_001166707       | Vmn1r12 | vomerolnasal 1 receptor 123                     | 21162185  | 21163108  | TC0700000327.mm.1  | 0.0  | 0.724052 |
| TC1400002201.mm.1 | ENSMUST00000157950 | Gm24537 | predicted gene, 24537                           | 4738832   | 4738933   | TC0700000040.mm.1  | 0.0  | 0.724175 |
| TC1400002208.mm.1 | ENSMUST00000184198 | RP23-14 | N/A                                             | 106123174 | 106124730 | TC0700001561.mm.1  | 0.0  | 0.724198 |
| TC1400002213.mm.1 | ENSMUST00000175397 | Gm25998 | predicted gene, 25998                           | 33362994  | 33363046  | TC0200000325.mm.1  | 0.0  | 0.724701 |
| TC1400002219.mm.1 | ENSMUST00000164535 | Gm20727 | predicted gene, 20727                           | 80271509  | 80271661  | TC1200000731.mm.1  | 0.1  | 0.724898 |
| TC1400002231.mm.1 | ENSMUST00000183103 | Gm6931  | predicted gene 6931                             | 49424681  | 49425814  | TC1600000703.mm.1  | 0.0  | 0.725027 |
| TC1400002259.mm.1 | NM_207230          | Olfr320 | olfactory receptor 320                          | 58683875  | 58684802  | TC1100000697.mm.1  | 0.0  | 0.72533  |
| TC1400002266.mm.1 | NM_001042768       | Proc    | protein C                                       | 32123126  | 32139570  | TC1800001122.mm.1  | 0.0  | 0.725413 |
| TC1400002267.mm.1 | NM_175475          | Cyp26b1 | cytochrome P450, family 26, subfamily b, polype | 84571414  | 84593908  | TC0600002592.mm.1  | 0.0  | 0.725476 |
| TC1400002283.mm.1 | ENSMUST00000158512 | Gm24768 | predicted gene, 24768                           | 44940635  | 44940635  | TC1500000357.mm.1  | 0.1  | 0.725598 |
| TC1400002285.mm.1 | NM_001005477       | Barhl2  | BarH-like 2 (Drosophila)                        | 106452514 | 106458440 | TC0500002910.mm.1  | 0.0  | 0.725659 |
| TC1400002290.mm.1 | ENSMUST00000115156 | Gm14543 | predicted gene 14543                            | 37886439  | 37897232  | TC0X00002074.mm.1  | 0.0  | 0.725875 |
| TC1400002302.mm.1 | NM_001164727       | Gm10406 | predicted gene 10406                            | 7006115   | 7027449   | TC1400002848.mm.1  | 0.0  | 0.725953 |
| TC1400002310.mm.1 | ENSMUST00000083990 | Gm22797 | predicted gene, 22797                           | 71663788  | 71663918  | TC1600000819.mm.1  | 0.0  | 0.726025 |
| TC1400002313.mm.1 | NM_144536          | Cdkal1  | CDK5 regulatory subunit associated protein 1-l  | 29191746  | 29855674  | TC1300001725.mm.1  | 0.0  | 0.726041 |
| TC1400002323.mm.1 | ENSMUST00000158550 | Gm22433 | predicted gene, 22433                           | 63152217  | 63152358  | TC0300000499.mm.1  | 0.0  | 0.726096 |
| TC1400002327.mm.1 | ENSMUST00000182266 | Gm2467  | predicted gene 2467                             | 21289219  | 21290228  | TC1000000164.mm.1  | 0.0  | 0.726141 |
| TC1400002331.mm.1 | ENSMUST00000087891 | Gm6206  | predicted pseudogene 6206                       | 103162894 | 103165427 | TC0X00002769.mm.1  | 0.0  | 0.726175 |
| TC1400002334.mm.1 | ENSMUST00000175481 | Gm25464 | predicted gene, 25464                           | 122388054 | 122388160 | TC1400002751.mm.1  | 0.0  | 0.726226 |
| TC1400002339.mm.1 | ENSMUST00000157914 | Gm23277 | predicted gene, 23277                           | 121712089 | 121712224 | TC0X00001189.mm.1  | 0.0  | 0.726673 |
| TC1400002341.mm.1 | ENSMUST00000111360 | LOC1000 | nuclear body protein SP140-like                 | 167446    | 196575    | TC1_GL456211_rand  | -0.1 | 0.726677 |
| TC1400002345.mm.1 | ENSMUST00000083166 | Gm26132 | predicted gene, 26132                           | 110923116 | 110923263 | TC0800001325.mm.1  | -0.1 | 0.726703 |
| TC1400002378.mm.1 | XR_105170          | Gm5602  | predicted gene 5602                             | 130861285 | 130866330 | TC0700004392.mm.1  | 0.0  | 0.727023 |
| TC1400002384.mm.1 | NM_028900          | Gcc1    | golgi coiled coil 1                             | 28416091  | 28428390  | TC0600001966.mm.1  | 0.0  | 0.727187 |
| TC1400002387.mm.1 | ENSMUST00000121891 | Gm14719 | predicted gene 14719                            | 49660960  | 49661190  | TC0X00000445.mm.1  | -0.1 | 0.727192 |
| TC1400002392.mm.1 | NM_009807          | Casp1   | caspase 1                                       | 5298517   | 5307281   | TC0900000031.mm.1  | 0.1  | 0.727201 |
| TC1400002393.mm.1 | NM_199062          | Zfp781  | zinc finger protein 781                         | 81901911  | 81930480  | TC1000002556.mm.1  | 0.0  | 0.727289 |
| TC1400002397.mm.1 | NM_199067          | Defb50  | defensin beta 50                                | 21823539  | 21831296  | TC0800000260.mm.1  | 0.0  | 0.727738 |
| TC1400002398.mm.1 | ENSMUST00000175342 | Gm24323 | predicted gene, 24323                           | 117085836 | 117085912 | TC1100001951.mm.1  | -0.1 | 0.727815 |
| TC1400002400.mm.1 | NM_026822          | Lce1b   | late cornified envelope 1B                      | 92655650  | 92656926  | TC0300002402.mm.1  | 0.0  | 0.727865 |
| TC1400002413.mm.1 | ENSMUST00000084011 | Gm23796 | predicted gene, 23796                           | 39666288  | 39666447  | TC0300000301.mm.1  | 0.0  | 0.72789  |
| TC1400002425.mm.1 | ENSMUST00000083168 | n-R5s50 | nuclear encoded rRNA 5S 50                      | 110161835 | 110161945 | TC1400001231.mm.1  | 0.1  | 0.728042 |
| TC1400002429.mm.1 | NM_025724          | Ccer1   | coiled coil glutamate rich protein 1            | 97693059  | 97694926  | TC1000001193.mm.1  | 0.0  | 0.728086 |
| TC1400002430.mm.1 | ENSMUST00000182757 | Gm9658  | predicted gene 9658                             | 43217150  | 43218161  | TC1500001458.mm.1  | 0.0  | 0.728197 |
| TC1400002436.mm.1 | NM_009288          | Stk10   | serine/threonine kinase 10                      | 32533266  | 32624595  | TC1100000343.mm.1  | -0.1 | 0.728379 |
| TC1400002439.mm.1 | ENSMUST00000165001 | Gm6872  | predicted gene 6872                             | 41668609  | 41669308  | TC0700002911.mm.1  | 0.0  | 0.728462 |
| TC1400002441.mm.1 | ENSMUST00000083196 | Gm24457 | predicted gene, 24457                           | 142772972 | 142773076 | TC03000003053.mm.1 | -0.1 | 0.728771 |
| TC1400002458.mm.1 | XR_105990          | 5730409 | RIKEN cDNA 5730409K12 gene                      | 7086037   | 7090204   | TC1900000130.mm.1  | 0.0  | 0.728823 |
| TC1400002464.mm.1 | NM_001025106       | Tmem201 | transmembrane protein 201                       | 149715375 | 149738068 | TC0400000409.mm.1  | 0.0  | 0.728843 |
| TC1400002468.mm.1 | NR_035430          | Mir1198 | microRNA 1198                                   | 55370695  | 55491306  | TC1200000466.mm.1  | -0.1 | 0.729014 |
| TC1400002470.mm.1 | ENSMUST00000104281 | Gm25922 | predicted gene, 25922                           | 34943856  | 34943985  | TC0700002841.mm.1  | 0.0  | 0.729115 |
| TC1400002487.mm.1 | NM_011228          | Rab33a  | RAB33A, member of RAS oncogene family           | 48519285  | 48530240  | TC0X00000436.mm.1  | 0.0  | 0.72924  |
| TC1400002492.mm.1 | NM_019640          | Pitpnb  | phosphatidylinositol transfer protein, beta     | 111330763 | 111388359 | TC0500001162.mm.1  | -0.1 | 0.729259 |
| TC1400002498.mm.1 | ENSMUST00000158842 | Gm23700 | predicted gene, 23700                           | 113666915 | 113667016 | TC07000004130.mm.1 | -0.1 | 0.729297 |
| TC1400002514.mm.1 | ENSMUST00000177661 | Gm23047 | predicted gene, 23047                           | 59733770  | 59733863  | TC0700003292.mm.1  | 0.0  | 0.729597 |
| TC1400002521.mm.1 | NM_008431          | Kcnk4   | potassium channel, subfamily K, member 4        | 6925690   | 6934515   | TC1900001022.mm.1  | 0.0  | 0.729606 |
| TC1400002524.mm.1 | NR_029830          | Mir194- | microRNA 194-2                                  | 6264643   | 6264728   | TC1900000109.mm.1  | 0.0  | 0.729863 |
| TC1400002537.mm.1 | ENSMUST00000179216 | Gm24269 | predicted gene, 24269                           | 110925403 | 110925479 | TC09000001476.mm.1 | 0.1  | 0.729971 |
| TC1400002575.mm.1 | XM_001478004       | Gm20935 | predicted gene, 20935                           | 68023542  | 68024225  | TC0Y00000182.mm.1  | 0.0  | 0.729976 |
| TC1400002577.mm.1 | NM_001244649       | Gm8765  | predicted gene 8765                             | 50698329  | 50703409  | TC1300000590.mm.1  | -0.1 | 0.730103 |
| TC1400002578.mm.1 | XM_001472852       | Gm2244  | predicted gene 2244                             | 19532896  | 19549958  | TC1400001516.mm.1  | 0.0  | 0.730224 |
| TC1400002584.mm.1 | NM_145496          | Dak     | dihydroxyacetone kinase 2 homolog (yeast)       | 10587791  | 10605432  | TC1900001109.mm.1  | 0.1  | 0.730297 |
| TC1400002598.mm.1 | ENSMUST00000171004 | Gm3104  | predicted gene 3104                             | 3086001   | 3087834   | TC0700000001.mm.1  | 0.0  | 0.730308 |
| TC1400002600.mm.1 | NM_146312          | Olfr657 | olfactory receptor 657                          | 104635676 | 104636636 | TC0700001528.mm.1  | 0.0  | 0.730403 |
| TC1400002603.mm.1 | NM_026514          | Cdc42ep | CDC42 effector protein (Rho GTPase binding) 3   | 79334025  | 79355091  | TC1700002564.mm.1  | 0.0  | 0.730637 |
| TC1400002617.mm.1 | ENSMUST00000157945 | Gm24531 | predicted gene, 24531                           | 57922088  | 57922187  | TC0300002036.mm.1  | 0.0  | 0.730674 |
| TC1400002622.mm.1 | NM_021448          | Elp2    | elongator acetyltransferase complex subunit 2   | 24603961  | 24638830  | TC1800000199.mm.1  | -0.1 | 0.730763 |
| TC1400002628.mm.1 | ENSMUST00000104021 | Gm25608 | predicted gene, 25608                           | 64002353  | 64002484  | TC0500002462.mm.1  | 0.0  | 0.730959 |
| TC1400002637.mm.1 | NM_201394          | Plec    | plectin                                         | 76170974  | 76232570  | TC1500002346.mm.1  | 0.0  | 0.731304 |
| TC1400002641.mm.1 | NM_008348          | Il10ra  | interleukin 10 receptor, alpha                  | 45253837  | 45269149  | TC0900002197.mm.1  | -0.1 | 0.731496 |
| TC1400002649.mm.1 | ENSMUST00000083803 | Gm24490 | predicted gene, 24490                           | 86292501  | 86292598  | TC0800001002.mm.1  | 0.0  | 0.73156  |
| TC1400002651.mm.1 | ENSMUST00000180010 | Gm22645 | predicted gene, 22645                           | 25694114  | 25694220  | TC1700001666.mm.1  | 0.0  | 0.731608 |
| TC1400002656.mm.1 | ENSMUST00000118965 | Gm5319  | predicted gene 5319                             | 41772633  | 41772633  | TC07000002150.mm.1 | 0.0  | 0.731772 |
| TC1400002657.mm.1 | NM_009845          | Cd22    | CD22 antigen                                    | 30865402  | 30880342  | TC0700002779.mm.1  | -0.2 | 0.732125 |
| TC1400002666.mm.1 | ENSMUST00000120199 | Gm12969 | predicted gene 12969                            | 128868393 | 128869396 | TC04000003579.mm.1 | 0.0  | 0.732156 |
| TC1400002669.mm.1 | NM_001198977       | Syk     | spleen tyrosine kinase                          | 52583173  | 52648792  | TC1300000612.mm.1  | -0.1 | 0.732229 |
| TC1400002671.mm.1 | NM_025542          | Rtfcd1  | replication termination factor 2 domain contain | 172440556 | 172469908 | TC0200002669.mm.1  | 0.1  | 0.732363 |
| TC1400002674.mm.1 | NM_008155          | Gpi1    | glucose phosphate isomerase 1                   | 34201327  | 34203036  | TC07000002828.mm.1 | 0.1  | 0.73239  |
| TC1400002677.mm.1 | NM_011747          | Zfp13   | zinc finger protein 13                          | 23575844  | 23599487  | TC1700001595.mm.1  | 0.0  | 0.732414 |
| TC1400002687.mm.1 | NM_001101533       | Vmn1r20 | vomerolnasal 1 receptor 20                      | 57431644  | 57432695  | TC0600000695.mm.1  | 0.0  | 0.732572 |
| TC1400002688.mm.1 | NM_139138          | Emr4    | EGF-like module containing, mucin-like, hormon  | 55749984  | 55853662  | TC1700000990.mm.1  | 0.0  | 0.733335 |

|                   |                    |         |                                                 |           |           |                    |      |          |
|-------------------|--------------------|---------|-------------------------------------------------|-----------|-----------|--------------------|------|----------|
| TC1400002694.mm.1 | ENSMUST00000178227 | Gm21847 | predicted gene, 21847                           | 15483291  | 15656679  | TC0500000107.mm.1  | 0.0  | 0.733337 |
| TC1400002697.mm.1 | ENSMUST00000118210 | Gm11550 | predicted gene 11550                            | 36539383  | 36540081  | TC0300001855.mm.1  | 0.0  | 0.733345 |
| TC1400002700.mm.1 | NR_028546          | Snora7a | small nucleolar RNA, H/ACA box 7A               | 115807975 | 115808114 | TC06000002961.mm.1 | -0.2 | 0.733565 |
| TC1400002711.mm.1 | ENSMUST00000183053 | Gm7507  | predicted gene 7507                             | 84812240  | 84813247  | TC06000000952.mm.1 | 0.1  | 0.733762 |
| TC1400002714.mm.1 | ENSMUST00000101878 | Gm23691 | predicted gene, 23691                           | 4380961   | 4381067   | TC0200002859.mm.1  | 0.0  | 0.733844 |
| TC1400002718.mm.1 | ENSMUST00000102400 | Gm23526 | predicted gene, 23526                           | 42862051  | 42862129  | TC09000002122.mm.1 | -0.1 | 0.733856 |
| TC1400002719.mm.1 | ENSMUST00000122472 | Gm25107 | predicted gene, 25107                           | 147484293 | 147484421 | TC0X000003147.mm.1 | 0.2  | 0.73394  |
| TC1400002740.mm.1 | ENSMUST00000179475 | Gm23308 | predicted gene, 23308                           | 119813233 | 119813339 | TC1300001356.mm.1  | 0.1  | 0.734168 |
| TC1400002744.mm.1 | NM_026123          | Unc50   | unc-50 homolog (C. elegans)                     | 37430170  | 37439124  | TC0100000260.mm.1  | 0.0  | 0.734446 |
| TC1400002746.mm.1 | XR_140837          | Gm20115 | predicted gene, 20115                           | 74536654  | 74537788  | TC07000003521.mm.1 | 0.0  | 0.734495 |
| TC1400002751.mm.1 | NM_001163564       | Naf1    | nuclear assembly factor 1 homolog (S. cerevisia | 66860217  | 66890564  | TC0800000691.mm.1  | 0.0  | 0.734648 |
| TC1400002755.mm.1 | ENSMUST00000097237 | Gm23741 | predicted gene, 23741                           | 4101890   | 4102060   | TC07000000022.mm.1 | 0.1  | 0.734834 |
| TC1400002764.mm.1 | NM_133351          | Prss8   | protease, serine, 8 (prostasin)                 | 127925717 | 127930113 | TC07000004346.mm.1 | 0.1  | 0.735078 |
| TC1400002780.mm.1 | NM_027482          | 5730508 | RIKEN cDNA 5730508B09 gene                      | 127869688 | 127896323 | TC0300002920.mm.1  | 0.0  | 0.735156 |
| TC1400002781.mm.1 | NM_145972          | BC02723 | cDNA sequence BC027231                          | 44724301  | 44737284  | TC1600000659.mm.1  | 0.0  | 0.735241 |
| TC1400002783.mm.1 | NM_001164082       | Polr3d  | polymerase (RNA) III (DNA directed) polypeptide | 70438748  | 70443471  | TC1400002341.mm.1  | 0.0  | 0.735457 |
| TC1400002784.mm.1 | ENSMUST00000083029 | Gm23570 | predicted gene, 23570                           | 20092615  | 20092718  | TC0500000152.mm.1  | -0.1 | 0.736231 |
| TC1400002788.mm.1 | ENSMUST00000177665 | Gm21833 | predicted gene, 21833                           | 82828382  | 82829881  | TC16000000930.mm.1 | 0.1  | 0.736373 |
| TC1400002789.mm.1 | BC119790           | Mfsd12  | major facilitator superfamily domain containing | 81357491  | 81366225  | TC1000000895.mm.1  | 0.0  | 0.736519 |
| TC1400002790.mm.1 | NM_025403          | Nop10   | NOP10 ribonucleoprotein                         | 112261926 | 112263269 | TC0200001663.mm.1  | 0.0  | 0.736542 |
| TC1400002791.mm.1 | NR_033628          | AA47433 | expressed sequence AA474331                     | 39890018  | 39899238  | TC1000002030.mm.1  | 0.0  | 0.73674  |
| TC1400002792.mm.1 | NM_053109          | Clec2d  | C-type lectin domain family 2, member d         | 129180615 | 129186535 | TC0600001530.mm.1  | -0.1 | 0.736796 |
| TC1400002793.mm.1 | ENSMUST00000174979 | Gm25675 | predicted gene, 25675                           | 119919324 | 119919441 | TC1200002516.mm.1  | -0.2 | 0.73686  |
| TC1400002794.mm.1 | ENSMUST00000082556 | Gm22283 | predicted gene, 22283                           | 76200118  | 76200278  | TC0600002517.mm.1  | 0.0  | 0.73689  |
| TC1400002800.mm.1 | NM_010174          | Fabp3   | fatty acid binding protein 3, muscle and heart  | 130308595 | 130315463 | TC0400001543.mm.1  | -0.1 | 0.736916 |
| TC1400002802.mm.1 | ENSMUST00000158619 | Gm24054 | predicted gene, 24054                           | 13902770  | 13902874  | TC0500001968.mm.1  | 0.0  | 0.736922 |
| TC1400002803.mm.1 | ENSMUST00000182954 | Gm8318  | predicted gene 8318                             | 18163886  | 18164752  | TC0700000124.mm.1  | 0.0  | 0.73693  |
| TC1400002804.mm.1 | NR_073559          | Stxbp3b | syntaxin-binding protein 3B                     | 9557606   | 9559248   | TC1900001085.mm.1  | 0.0  | 0.736942 |
| TC1400002805.mm.1 | ENSMUST00000102469 | Gm25986 | predicted gene, 25986                           | 62808349  | 62808416  | TC1600000786.mm.1  | 0.1  | 0.736971 |
| TC1400002807.mm.1 | NCBI_Gene:629860:p | Ighv1-1 | immunoglobulin heavy variable V1-12             | 114615850 | 114616143 | TC1200002607.mm.1  | -0.1 | 0.73701  |
| TC1400002808.mm.1 | ENSMUST00000182514 | Gm9568  | predicted gene 9568                             | 75854819  | 75856228  | TC1500001746.mm.1  | 0.0  | 0.737064 |
| TC1400002809.mm.1 | ENSMUST00000104447 | Gm22150 | predicted gene, 22150                           | 55469025  | 55469159  | TC0400002690.mm.1  | 0.1  | 0.737106 |
| TC1400002810.mm.1 | NM_001145832       | Kifc3   | kinesin family member C3                        | 95099828  | 95142540  | TC0800002739.mm.1  | 0.0  | 0.737181 |
| TC1400002811.mm.1 | XM_001477730       | Gm3233  | predicted gene 3233                             | 77758990  | 77759682  | TC1000002427.mm.1  | 0.0  | 0.737245 |
| TC1400002812.mm.1 | OTTMUST00000059639 | RP23-34 | ---                                             | 117808720 | 117809220 | TC0600001318.mm.1  | 0.0  | 0.737496 |
| TC1400002813.mm.1 | ENSMUST00000083988 | n-R5-8s | nuclear encoded rRNA 5.8S 1                     | 73533403  | 73533550  | TC1800001576.mm.1  | 0.1  | 0.737585 |
| TC1400002815.mm.1 | NM_011542          | Tcea3   | transcription elongation factor A (SII), 3      | 136247729 | 136274899 | TC0400001681.mm.1  | 0.0  | 0.737751 |
| TC1400002816.mm.1 | ENSMUST00000157332 | Gm22560 | predicted gene, 22560                           | 63509895  | 63510014  | TC1800000652.mm.1  | 0.0  | 0.738158 |
| TC1400002818.mm.1 | NM_025518          | Dus2l   | dihydrouridine synthase 2-like (SMM1, S. cerevi | 105991337 | 106053840 | TC0800001236.mm.1  | 0.0  | 0.738307 |
| TC1400002820.mm.1 | ENSMUST00000157865 | Gm24400 | predicted gene, 24400                           | 43857245  | 43857351  | TC1900001548.mm.1  | 0.0  | 0.73853  |
| TC1400002821.mm.1 | ENSMUST00000104520 | Gm24071 | predicted gene, 24071                           | 48617823  | 48617954  | TC1000000945.mm.1  | 0.0  | 0.739027 |
| TC1400002822.mm.1 | ENSMUST00000157355 | Gm22226 | predicted gene, 22226                           | 96919994  | 96920102  | TC07000003761.mm.1 | -0.1 | 0.739257 |
| TC1400002823.mm.1 | ENSMUST00000082803 | Gm23056 | predicted gene, 23056                           | 128885909 | 128886019 | TC0100003031.mm.1  | 0.0  | 0.739428 |
| TC1400002824.mm.1 | ENSMUST00000158500 | Gm26403 | predicted gene, 26403                           | 61138509  | 61138613  | TC1800001414.mm.1  | 0.0  | 0.739674 |
| TC1400002825.mm.1 | NM_026042          | Med29   | mediator complex subunit 29                     | 28385247  | 28392708  | TC0700002697.mm.1  | 0.0  | 0.73977  |
| TC1400002826.mm.1 | ENSMUST00000158067 | Gm23838 | predicted gene, 23838                           | 6014863   | 6015024   | TC0500001916.mm.1  | 0.0  | 0.739804 |
| TC1400002827.mm.1 | XM_003689112       | Gm21658 | predicted gene, 21658                           | 78035031  | 78035714  | TC0Y00000481.mm.1  | 0.0  | 0.740103 |
| TC1400002828.mm.1 | NM_028748          | Paqr5   | progesterin and adipoQ receptor family member V | 61953481  | 62026856  | TC0900002452.mm.1  | 0.0  | 0.740382 |
| TC1400002829.mm.1 | NM_144874          | Cox15   | cytochrome c oxidase assembly protein 15        | 43733254  | 43753000  | TC1900001545.mm.1  | 0.0  | 0.740448 |
| TC1400002830.mm.1 | NM_023792          | Pank1   | pantothenate kinase 1                           | 34806936  | 34879455  | TC1900001428.mm.1  | 0.1  | 0.740474 |
| TC1400002832.mm.1 | NM_026938          | Tmem160 | transmembrane protein 160                       | 16452779  | 16455490  | TC0700000228.mm.1  | 0.0  | 0.740585 |
| TC1400002837.mm.1 | ENSMUST00000116724 | Gm22953 | predicted gene, 22953                           | 121450670 | 121450770 | TC0200004490.mm.1  | 0.0  | 0.740641 |
| TC1400002838.mm.1 | NM_001081300       | Tshz1   | teashirt zinc finger family member 1            | 84011627  | 84086562  | TC1800001700.mm.1  | 0.0  | 0.740867 |
| TC1400002839.mm.1 | NM_001082532       | Pigyl   | phosphatidylinositol glycan anchor biosynthesis | 22156846  | 22158358  | TC0900000214.mm.1  | 0.0  | 0.74102  |
| TC1400002841.mm.1 | NM_181394          | Anapc13 | anaphase promoting complex subunit 13           | 102626296 | 102634244 | TC0900001290.mm.1  | 0.1  | 0.741175 |
| TC1400002842.mm.1 | NM_013465          | Ahsg    | alpha-2-HS-glycoprotein                         | 22892015  | 22899451  | TC1600000323.mm.1  | -0.1 | 0.741311 |
| TC1400002843.mm.1 | NM_001160356       | Al46249 | expressed sequence Al462493                     | 8880014   | 8880933   | TC1900001073.mm.1  | 0.0  | 0.741381 |
| TC1400002844.mm.1 | NM_008537          | Amacr   | alpha-methylacyl-CoA racemase                   | 10981756  | 10996624  | TC1500000087.mm.1  | 0.0  | 0.741419 |
| TC1400002845.mm.1 | NM_001011791       | Olfr193 | olfactory receptor 193                          | 59109625  | 59110633  | TC1600001791.mm.1  | 0.0  | 0.741721 |
| TC1400002846.mm.1 | ENSMUST00000158000 | Gm23318 | predicted gene, 23318                           | 148555697 | 148555804 | TC0400001932.mm.1  | 0.0  | 0.742006 |
| TC1400002847.mm.1 | ENSMUST00000083162 | Gm23680 | predicted gene, 23680                           | 12363410  | 12363573  | TC1000000090.mm.1  | -0.1 | 0.742072 |
| TC1400002848.mm.1 | XM_003689085       | Gm21127 | predicted gene, 21127                           | 68464868  | 68465551  | TC0Y00000184.mm.1  | 0.0  | 0.742096 |
| TC1400002849.mm.1 | XM_001476336       | Gm20887 | predicted gene, 20887                           | 50954848  | 50955531  | TC0Y00000359.mm.1  | 0.0  | 0.742096 |
| TC1400002850.mm.1 | XM_003689055       | Gm21245 | predicted gene, 21245                           | 52261943  | 52262626  | TC0Y00000365.mm.1  | 0.0  | 0.742096 |
| TC1400002851.mm.1 | XM_001477750       | Gm20921 | predicted gene, 20921                           | 64858669  | 64859352  | TC0Y00000424.mm.1  | 0.0  | 0.742096 |
| TC1400002853.mm.1 | XM_001474123       | Gm20842 | predicted gene, 20842                           | 72039009  | 72039692  | TC0Y00000450.mm.1  | 0.0  | 0.742096 |
| TC1400002854.mm.1 | NM_019566          | Rhog    | ras homolog gene family, member G               | 102239123 | 102250123 | TC0700003857.mm.1  | 0.0  | 0.742322 |
| TC1400002855.mm.1 | NM_009330          | Hnf1b   | HNF1 homeobox B                                 | 83850063  | 83905917  | TC1100001271.mm.1  | 0.0  | 0.742328 |
| TC1400002856.mm.1 | ENSMUST00000122132 | Gm14006 | predicted gene 14006                            | 128557254 | 128558234 | TC0200004577.mm.1  | 0.0  | 0.742391 |
| TC1400002857.mm.1 | NM_146611          | Olfr970 | olfactory receptor 970                          | 39819641  | 39820576  | TC0900000438.mm.1  | 0.0  | 0.742397 |
| TC1400002864.mm.1 | XR_140492          | Gm20038 | predicted gene, 20038                           | 16457654  | 16461843  | TC0200000277.mm.1  | 0.0  | 0.742735 |
| TC1400002869.mm.1 | ENSMUST00000104205 | Gm24338 | predicted gene, 24338                           | 101222952 | 101223078 | TC0900001275.mm.1  | 0.0  | 0.74304  |
| TC1500000014.mm.1 | NR_040686          | 8430423 | RIKEN cDNA 8430423G03 gene                      | 148950250 | 148951658 | TC0500001830.mm.1  | 0.0  | 0.743097 |
| TC1500000017.mm.1 | NM_013898          | Timm8a1 | translocase of inner mitochondrial membrane 8/  | 134537256 | 134541865 | TC0X00002993.mm.1  | 0.0  | 0.743193 |
| TC1500000018.mm.1 | NM_008223          | Serpind | serine (or cysteine) peptidase inhibitor, clade | 17331371  | 17343575  | TC1600000214.mm.1  | 0.0  | 0.743248 |
| TC1500000019.mm.1 | ENSMUST00000158225 | Gm24729 | predicted gene, 24729                           | 66305889  | 66306025  | TC0100000554.mm.1  | 0.0  | 0.743425 |
| TC1500000020.mm.1 | ENSMUST00000160944 | Gm16088 | predicted gene 16088                            | 3054233   | 3054733   | TC0100000001.mm.1  | 0.0  | 0.743498 |
| TC1500000021.mm.1 | NM_001177715       | Gm2897  | predicted gene 2897                             | 3049285   | 3077025   | TC1400002780.mm.1  | 0.0  | 0.743548 |

|                   |                    |         |                                                 |           |           |                    |      |          |
|-------------------|--------------------|---------|-------------------------------------------------|-----------|-----------|--------------------|------|----------|
| TC1500000022.mm.1 | NM_177010          | F630003 | RIKEN cDNA F630003A18 gene                      | 0         | 0         | TSUnmapped0000005  | 0.0  | 0.743604 |
| TC1500000052.mm.1 | NM_011852          | Oas1g   | 2-5 oligoadenylate synthetase 1G                | 120876142 | 120887613 | TC0500003180.mm.1  | 0.0  | 0.743936 |
| TC1500000055.mm.1 | NM_021426          | Nkain4  | Na+/K+ transporting ATPase interacting 4        | 180934770 | 180954699 | TC0200005426.mm.1  | 0.0  | 0.743988 |
| TC1500000062.mm.1 | ENSMUST00000119399 | Gm11719 | predicted gene 11719                            | 107330708 | 107331058 | TC1100001794.mm.1  | 0.0  | 0.744179 |
| TC1500000073.mm.1 | ENSMUST00000095320 | Gm10313 | predicted pseudogene 10313                      | 46254677  | 46255678  | TC0800002157.mm.1  | 0.0  | 0.744293 |
| TC1500000074.mm.1 | ENSMUST00000099450 | Gm6478  | predicted pseudogene 6478                       | 62035420  | 62036163  | TC1300000749.mm.1  | 0.0  | 0.744332 |
| TC1500000081.mm.1 | ENSMUST00000157869 | Gm24399 | predicted gene, 24399                           | 65660806  | 65660879  | TC0500000621.mm.1  | 0.0  | 0.744428 |
| TC1500000087.mm.1 | NM_028153          | Emi2    | echinoderm microtubule associated protein like  | 19176421  | 19206482  | TC0700000290.mm.1  | 0.0  | 0.74447  |
| TC1500000090.mm.1 | NM_146899          | Olfr121 | olfactory receptor 1219                         | 89074154  | 89075089  | TC0200004039.mm.1  | 0.0  | 0.744567 |
| TC1500000094.mm.1 | ENSMUST00000120130 | Atp5l2  | ATP synthase, H+ transporting, mitochondrial FC | 97768060  | 97768371  | TC1100001549.mm.1  | -0.1 | 0.744663 |
| TC1500000102.mm.1 | NM_028189          | B3gnt3  | UDP-GlcNAc:betaGal beta-1,3-N-acetylglucosam    | 71691719  | 71703534  | TC0800002440.mm.1  | 0.0  | 0.74499  |
| TC1500000104.mm.1 | ENSMUST00000104039 | Gm22272 | predicted gene, 22272                           | 11933495  | 11933628  | TC1900001149.mm.1  | 0.0  | 0.745017 |
| TC1500000109.mm.1 | ENSMUST00000157181 | Gm23432 | predicted gene, 23432                           | 119638744 | 119638874 | TC03000002827.mm.1 | 0.0  | 0.74503  |
| TC1500000111.mm.1 | NM_029982          | A930009 | RIKEN cDNA A930009A15 gene                      | 115569986 | 115582454 | TC1000001332.mm.1  | 0.0  | 0.745044 |
| TC1500000124.mm.1 | ENSMUST00000082970 | Gm25404 | predicted gene, 25404                           | 55548446  | 55548552  | TC0300000430.mm.1  | -0.1 | 0.74507  |
| TC1500000138.mm.1 | ENSMUST00000118647 | Gm16123 | predicted gene 16123                            | 12565518  | 12567222  | TC0600000087.mm.1  | 0.0  | 0.745392 |
| TC1500000140.mm.1 | NR_030602          | Mir449b | microRNA 449b                                   | 113037419 | 113037498 | TC1300001280.mm.1  | 0.0  | 0.745696 |
| TC1500000141.mm.1 | NM_146878          | Olfr30  | olfactory receptor 30                           | 58454915  | 58455980  | TC1100002818.mm.1  | 0.0  | 0.745788 |
| TC1500000145.mm.1 | ENSMUST00000103982 | SNORA43 | Small nucleolar RNA SNORA43                     | 56897625  | 56897757  | TC0400002711.mm.1  | 0.2  | 0.745986 |
| TC1500000165.mm.1 | NM_001168679       | Tspan8  | tetraspanin 8                                   | 115817283 | 115849893 | TC1000001333.mm.1  | 0.1  | 0.746097 |
| TC1500000174.mm.1 | NM_008853          | Pja1    | praja1, RING-H2 motif containing                | 99465734  | 99471273  | TC0X00002701.mm.1  | 0.0  | 0.746099 |
| TC1500000175.mm.1 | ENSMUST00000104195 | Gm22659 | predicted gene, 22659                           | 46562974  | 46563103  | TC0900000566.mm.1  | 0.0  | 0.746283 |
| TC1500000199.mm.1 | ENSMUST00000083384 | Gm24099 | predicted gene, 24099                           | 112590772 | 112590878 | TC0400003291.mm.1  | 0.0  | 0.746463 |
| TC1500000201.mm.1 | ENSMUST00000157840 | Gm24745 | predicted gene, 24745                           | 107136974 | 107137058 | TC1000001259.mm.1  | 0.0  | 0.746493 |
| TC1500000207.mm.1 | ENSMUST00000184268 | AC11298 | N/A                                             | 117561230 | 117561339 | TC0100001056.mm.1  | 0.0  | 0.746509 |
| TC1500000235.mm.1 | ENSMUST00000184396 | AC14485 | N/A                                             | 40684181  | 40684290  | TC0Y00000130.mm.1  | 0.0  | 0.746509 |
| TC1500000261.mm.1 | ENSMUST00000103869 | AC14485 | N/A                                             | 40688738  | 40688847  | TC0Y00000131.mm.1  | 0.0  | 0.746509 |
| TC1500000262.mm.1 | ENSMUST00000179691 | Gm24755 | predicted gene, 24755                           | 60369054  | 60369163  | TC1600001817.mm.1  | 0.0  | 0.746509 |
| TC1500000264.mm.1 | NM_001033209       | Xylb    | xylulokinase homolog (H. influenzae)            | 119357381 | 119393797 | TC0900001578.mm.1  | 0.1  | 0.746757 |
| TC1500000278.mm.1 | NM_001177504       | Gm6588  | predicted gene 6588                             | 112449426 | 112451738 | TC0500001183.mm.1  | 0.0  | 0.746761 |
| TC1500000280.mm.1 | ENSMUST00000183415 | AC11398 | N/A                                             | 33260716  | 33260820  | TC0300001810.mm.1  | 0.0  | 0.746767 |
| TC1500000287.mm.1 | NR_039586          | Mir5125 | microRNA 5125                                   | 48219730  | 48301462  | TC0100001697.mm.1  | 0.1  | 0.746836 |
| TC1500000289.mm.1 | ENSMUST00000104213 | n-R5s82 | nuclear encoded rRNA 5S 82                      | 37026399  | 37026507  | TC0900000354.mm.1  | 0.0  | 0.747356 |
| TC1500000296.mm.1 | NM_001081094       | Znhit6  | zinc finger, HIT type 6                         | 145576208 | 145605245 | TC0300001478.mm.1  | 0.0  | 0.747443 |
| TC1500000298.mm.1 | NM_174990          | Gimap4  | GTPase, IMAP family member 4                    | 48684549  | 48692062  | TC0600000566.mm.1  | -0.1 | 0.747471 |
| TC1500000299.mm.1 | ENSMUST00000179454 | Gm23139 | predicted gene, 23139                           | 6151217   | 6151348   | TC1500001162.mm.1  | 0.0  | 0.747661 |
| TC1500000301.mm.1 | ENSMUST00000058103 | Gm5436  | predicted pseudogene 5436                       | 84258332  | 84258973  | TC1200002074.mm.1  | -0.1 | 0.747825 |
| TC1500000317.mm.1 | NCBI_Gene:628098:p | Ighv5-1 | Ighv5-12-4 immunoglobulin heavy variable 5-12-  | 113762251 | 113762544 | TC1200002565.mm.1  | 0.1  | 0.747948 |
| TC1500000329.mm.1 | ENSMUST00000175422 | Gm22994 | predicted gene, 22994                           | 129282865 | 129282946 | TC0400003589.mm.1  | -0.1 | 0.748063 |
| TC1500000339.mm.1 | NM_177135          | D830030 | RIKEN cDNA D830030K20 gene                      | 3208493   | 3234351   | TC1400000004.mm.1  | 0.0  | 0.748143 |
| TC1500000344.mm.1 | NM_011756          | Zfp36   | zinc finger protein 36                          | 28376784  | 28379255  | TC0700002696.mm.1  | -0.1 | 0.748191 |
| TC1500000349.mm.1 | ENSMUST00000182991 | Gm4575  | predicted gene 4575                             | 91428883  | 91429884  | TC0600001085.mm.1  | 0.1  | 0.74828  |
| TC1500000352.mm.1 | ENSMUST00000101958 | Gm23940 | predicted gene, 23940                           | 3490309   | 3490413   | TC1900000012.mm.1  | 0.0  | 0.748343 |
| TC1500000353.mm.1 | NM_146934          | Olfr46  | olfactory receptor 46                           | 140601340 | 140611124 | TC0700002015.mm.1  | 0.0  | 0.748377 |
| TC1500000355.mm.1 | NM_201360          | Cyp2d12 | cytochrome P450, family 2, subfamily d, polypep | 82555098  | 82559413  | TC1500000760.mm.1  | 0.0  | 0.748535 |
| TC1500000357.mm.1 | NM_001099330       | Scgb1b3 | secretoglobin, family 1B, member 30             | 34095431  | 34100837  | TC0700000629.mm.1  | 0.0  | 0.748579 |
| TC1500000358.mm.1 | NM_145965          | Gphn    | gephyrin                                        | 78226655  | 78684772  | TC1200000700.mm.1  | 0.1  | 0.748585 |
| TC1500000365.mm.1 | ENSMUST00000082955 | Gm24200 | predicted gene, 24200                           | 94284496  | 94284652  | TC0900001179.mm.1  | 0.0  | 0.748659 |
| TC1500000366.mm.1 | ENSMUST00000157862 | Gm26045 | predicted gene, 26045                           | 32023344  | 32023440  | TC1400000335.mm.1  | 0.0  | 0.748701 |
| TC1500000368.mm.1 | ENSMUST00000178790 | Gm24655 | predicted gene, 24655                           | 23166865  | 23166971  | TC1000001869.mm.1  | -0.1 | 0.748782 |
| TC1500000380.mm.1 | NM_025753          | Tmem239 | transmembrane 239                               | 130406478 | 130407899 | TC0200001981.mm.1  | 0.0  | 0.748835 |
| TC1500000389.mm.1 | NM_010237          | Frk     | fyn-related kinase                              | 34483399  | 34611232  | TC1000000301.mm.1  | 0.0  | 0.748973 |
| TC1500000395.mm.1 | ENSMUST00000117854 | Gm13296 | predicted gene 13296                            | 11420222  | 11421236  | TC0200000218.mm.1  | 0.0  | 0.74902  |
| TC1500000407.mm.1 | ENSMUST00000082794 | Gm25851 | predicted gene, 25851                           | 58357952  | 58358058  | TC0X00002284.mm.1  | 0.0  | 0.749512 |
| TC1500000410.mm.1 | NM_173733          | Suox    | sulfite oxidase                                 | 128669887 | 128673918 | TC1000003158.mm.1  | 0.0  | 0.749602 |
| TC1500000417.mm.1 | ENSMUST00000072887 | Olfr664 | olfactory receptor 664                          | 104733385 | 104734362 | TC0700003953.mm.1  | 0.0  | 0.74975  |
| TC1500000423.mm.1 | ENSMUST00000116985 | Gm25509 | predicted gene, 25509                           | 72899882  | 72899987  | TC1800001572.mm.1  | 0.0  | 0.749764 |
| TC1500000428.mm.1 | NM_146952          | Olfr522 | olfactory receptor 522                          | 140161939 | 140163014 | TC0700004496.mm.1  | 0.0  | 0.749808 |
| TC1500000433.mm.1 | ENSMUST00000168877 | Gm17657 | predicted gene, 17657                           | 29519281  | 29519790  | TC1700001786.mm.1  | 0.0  | 0.749956 |
| TC1500000439.mm.1 | ENSMUST00000083959 | n-R5s15 | nuclear encoded rRNA 5S 151                     | 16471813  | 16471931  | TC0700000229.mm.1  | -0.2 | 0.750058 |
| TC1500000441.mm.1 | NM_009434          | Phlda2  | pleckstrin homology-like domain, family A, mem  | 143501545 | 143502541 | TC0700004586.mm.1  | 0.0  | 0.750281 |
| TC1500000442.mm.1 | NM_029497          | Urb1    | URB1 ribosome biogenesis 1 homolog (S. cerevis  | 90751527  | 90810413  | TC1600002056.mm.1  | 0.0  | 0.750395 |
| TC1500000453.mm.1 | ENSMUST00000055830 | 4930500 | RIKEN cDNA 4930500M09 gene                      | 170214860 | 170215556 | TC0100001566.mm.1  | 0.0  | 0.750494 |
| TC1500000462.mm.1 | NM_177570          | Sifnl1  | schlafen like 1                                 | 120532231 | 120536661 | TC0400001352.mm.1  | 0.0  | 0.750552 |
| TC1500000471.mm.1 | ENSMUST00000182596 | Gm5732  | predicted gene 5732                             | 33402819  | 33403825  | TC0700000613.mm.1  | 0.0  | 0.750681 |
| TC1500000474.mm.1 | NM_009056          | Rfx2    | regulatory factor X, 2 (influences HLA class II | 56775897  | 56831013  | TC1700002337.mm.1  | 0.0  | 0.750785 |
| TC1500000475.mm.1 | NM_001033400       | Gm806   | predicted gene 806                              | 50467307  | 50475355  | TC1300000588.mm.1  | 0.0  | 0.750825 |
| TC1500000480.mm.1 | ENSMUST00000158149 | Gm26036 | predicted gene, 26036                           | 154134030 | 154134173 | TC04000002040.mm.1 | 0.0  | 0.750964 |
| TC1500000498.mm.1 | NM_001145969       | Rwdd2a  | RWD domain containing 2A                        | 86571988  | 86574899  | TC0900001115.mm.1  | 0.0  | 0.751311 |
| TC1500000499.mm.1 | ENSMUST00000175601 | Gm26119 | predicted gene, 26119                           | 8698253   | 8698356   | TC1800000959.mm.1  | 0.0  | 0.751589 |
| TC1500000509.mm.1 | NM_177673          | Cep104  | centrosomal protein 104                         | 153975194 | 154008732 | TC0400002035.mm.1  | 0.0  | 0.751604 |
| TC1500000524.mm.1 | ENSMUST00000104063 | Gm26074 | predicted gene, 26074                           | 43833683  | 43833811  | TC1600001634.mm.1  | 0.0  | 0.751651 |
| TC1500000525.mm.1 | NM_173753          | Fnip1   | folliculin interacting protein 1                | 54438179  | 54518241  | TC1100000625.mm.1  | 0.0  | 0.752057 |
| TC1500000526.mm.1 | ENSMUST00000185037 | SCARNA1 | small Cajal body-specific RNA 17                | 156964158 | 156964293 | TC0200005007.mm.1  | 0.0  | 0.752163 |
| TC1500000528.mm.1 | XR_032520          | Gm10021 | predicted gene 10021                            | 5607620   | 5813031   | TC1400002838.mm.1  | 0.0  | 0.752167 |
| TC1500000543.mm.1 | ENSMUST00000158879 | Gm23475 | predicted gene, 23475                           | 58143208  | 58143269  | TC1500001569.mm.1  | 0.0  | 0.752274 |
| TC1500000557.mm.1 | ENSMUST00000122544 | Gm22106 | predicted gene, 22106                           | 73729164  | 73729290  | TC1500000525.mm.1  | 0.0  | 0.752493 |
| TC1500000562.mm.1 | NM_199310          | Ccdc32  | coiled-coil domain containing 32                | 119017779 | 119029393 | TC0200004422.mm.1  | 0.0  | 0.752505 |

|                   |                    |         |                                                 |           |           |                   |      |          |
|-------------------|--------------------|---------|-------------------------------------------------|-----------|-----------|-------------------|------|----------|
| TC1500000565.mm.1 | NM_207683          | Pik3c2g | phosphatidylinositol 3-kinase, C2 domain contai | 139715859 | 139969284 | TC0600001648.mm.1 | 0.0  | 0.752691 |
| TC1500000566.mm.1 | NM_009000          | Rab24   | RAB24, member RAS oncogene family               | 55319223  | 55321980  | TC1300002052.mm.1 | 0.0  | 0.752746 |
| TC1500000567.mm.1 | NCBI_Gene:629919:p | Ighv8-4 | immunoglobulin heavy variable V8-4              | 115024026 | 115024319 | TC1200002480.mm.1 | 0.0  | 0.752877 |
| TC1500000570.mm.1 | ENSMUST00000157250 | Gm26104 | predicted gene, 26104                           | 176700617 | 176700724 | TC0100001661.mm.1 | 0.0  | 0.753053 |
| TC1500000571.mm.1 | ENSMUST00000122380 | Gm8061  | predicted gene 8061                             | 139358468 | 139359257 | TC0X00001369.mm.1 | 0.0  | 0.753149 |
| TC1500000580.mm.1 | NM_001045523       | Bahd1   | bromo adjacent homology domain containing 1     | 118900377 | 118924528 | TC0200001750.mm.1 | 0.0  | 0.753196 |
| TC1500000586.mm.1 | ENSMUST00000158155 | Gm22447 | predicted gene, 22447                           | 21703175  | 21703266  | TC0800001852.mm.1 | 0.0  | 0.753385 |
| TC1500000587.mm.1 | uc029wod.1         | Mir1196 | microRNA 1196 (Mir1196), microRNA.              | 121943060 | 121953464 | TC0700004220.mm.1 | -0.1 | 0.753396 |
| TC1500000593.mm.1 | NM_145211          | Oas1a   | 2-5 oligoadenylate synthetase 1A                | 120896256 | 120907525 | TC0500003181.mm.1 | 0.0  | 0.753591 |
| TC1500000596.mm.1 | ENSMUST00000103770 | Gm24935 | predicted gene, 24935                           | 87456778  | 87456887  | TC1300000994.mm.1 | 0.0  | 0.753706 |
| TC1500000610.mm.1 | NM_028790          | Acot12  | acyl-CoA thioesterase 12                        | 91741512  | 91786148  | TC1300001028.mm.1 | 0.0  | 0.753866 |
| TC1500000612.mm.1 | ENSMUST00000104502 | Gm25232 | predicted gene, 25232                           | 48572253  | 48572384  | TC1300001945.mm.1 | 0.0  | 0.754033 |
| TC1500000613.mm.1 | ENSMUST00000175282 | Gm25304 | predicted gene, 25304                           | 122305544 | 122305798 | TC0600003063.mm.1 | 0.0  | 0.754056 |
| TC1500000614.mm.1 | ENSMUST00000083289 | Gm25792 | predicted gene, 25792                           | 33293676  | 33293775  | TC0100000212.mm.1 | 0.0  | 0.754215 |
| TC1500000618.mm.1 | ENSMUST00000169023 | Gm5799  | predicted gene 5799                             | 43543576  | 43551213  | TC1400000443.mm.1 | 0.0  | 0.754239 |
| TC1500000641.mm.1 | ENSMUST00000182724 | Gm9149  | predicted gene 9149                             | 32604815  | 32605821  | TC0700000601.mm.1 | 0.0  | 0.754708 |
| TC1500000649.mm.1 | ENSMUST00000175274 | Gm22463 | predicted gene, 22463                           | 5644645   | 5644745   | TC0100001918.mm.1 | 0.1  | 0.754795 |
| TC1500000655.mm.1 | ENSMUST00000175374 | Gm25972 | predicted gene, 25972                           | 84150055  | 84150155  | TC0200001215.mm.1 | 0.1  | 0.754795 |
| TC1500000658.mm.1 | ENSMUST00000175281 | Gm22547 | predicted gene, 22547                           | 11154337  | 11154437  | TC0300000076.mm.1 | 0.1  | 0.754795 |
| TC1500000659.mm.1 | ENSMUST00000175001 | Gm23976 | predicted gene, 23976                           | 4305193   | 4305293   | TC0300001597.mm.1 | 0.1  | 0.754795 |
| TC1500000662.mm.1 | ENSMUST00000178407 | Gm26386 | predicted gene, 26386                           | 24143368  | 24143468  | TC0600000198.mm.1 | 0.1  | 0.754795 |
| TC1500000665.mm.1 | ENSMUST00000178981 | Gm25458 | predicted gene, 25458                           | 55308805  | 55308905  | TC0600002328.mm.1 | 0.1  | 0.754795 |
| TC1500000666.mm.1 | ENSMUST00000175618 | Gm23292 | predicted gene, 23292                           | 36302515  | 36302615  | TC0700000675.mm.1 | 0.1  | 0.754795 |
| TC1500000667.mm.1 | ENSMUST00000175466 | Gm22414 | predicted gene, 22414                           | 18017252  | 18017352  | TC0700002448.mm.1 | 0.1  | 0.754795 |
| TC1500000676.mm.1 | ENSMUST00000178119 | Gm23646 | predicted gene, 23646                           | 107840957 | 107841057 | TC0800001280.mm.1 | 0.1  | 0.754795 |
| TC1500000677.mm.1 | ENSMUST00000179444 | Gm22825 | predicted gene, 22825                           | 107842451 | 107842551 | TC0800001281.mm.1 | 0.1  | 0.754795 |
| TC1500000678.mm.1 | ENSMUST00000174944 | Gm26241 | predicted gene, 26241                           | 44547974  | 44548074  | TC0800002136.mm.1 | 0.1  | 0.754795 |
| TC1500000679.mm.1 | ENSMUST00000175588 | Gm24973 | predicted gene, 24973                           | 92989095  | 92989195  | TC0X00002626.mm.1 | 0.1  | 0.754795 |
| TC1500000680.mm.1 | ENSMUST00000175297 | Gm22913 | predicted gene, 22913                           | 96164331  | 96164431  | TC1000001175.mm.1 | 0.1  | 0.754795 |
| TC1500000693.mm.1 | ENSMUST00000175556 | Gm25084 | predicted gene, 25084                           | 22204575  | 22204675  | TC1300001587.mm.1 | 0.1  | 0.754795 |
| TC1500000696.mm.1 | ENSMUST00000175306 | Gm23282 | predicted gene, 23282                           | 22212419  | 22212519  | TC1300001588.mm.1 | 0.1  | 0.754795 |
| TC1500000698.mm.1 | ENSMUST00000178350 | Gm24302 | predicted gene, 24302                           | 12695124  | 12695224  | TC1500000109.mm.1 | 0.1  | 0.754795 |
| TC1500000704.mm.1 | ENSMUST00000178305 | Gm24643 | predicted gene, 24643                           | 89888952  | 89889052  | TC1500002062.mm.1 | 0.1  | 0.754795 |
| TC1500000715.mm.1 | ENSMUST00000175533 | Gm26235 | predicted gene, 26235                           | 18099560  | 18099660  | TC1800000147.mm.1 | 0.1  | 0.754795 |
| TC1500000721.mm.1 | NM_145998          | Hmx2    | H6 homeobox 2                                   | 131548773 | 131556588 | TC0700001926.mm.1 | 0.0  | 0.754981 |
| TC1500000722.mm.1 | NM_001167587       | Gm9116  | predicted gene 5916                             | 36119934  | 36128779  | TC0900002029.mm.1 | 0.0  | 0.755053 |
| TC1500000724.mm.1 | NM_010399          | H2-T9   | histocompatibility 2, T region locus 9          | 36037128  | 36042747  | TC1700002822.mm.1 | 0.0  | 0.755346 |
| TC1500000729.mm.1 | ENSMUST00000121213 | Gm12605 | predicted gene 12605                            | 89216864  | 89217816  | TC0400000915.mm.1 | 0.0  | 0.755443 |
| TC1500000734.mm.1 | ENSMUST00000082064 | Gm6316  | predicted pseudogene 6316                       | 69920471  | 69921491  | TC1200001879.mm.1 | 0.0  | 0.755555 |
| TC1500000735.mm.1 | NM_011591          | Timm17b | translocase of inner mitochondrial membrane 17  | 7899357   | 7908351   | TC0X00000076.mm.1 | 0.0  | 0.755983 |
| TC1500000742.mm.1 | ENSMUST00000122752 | n-R5s87 | nuclear encoded rRNA 5S 87                      | 96549594  | 96549709  | TC0900002884.mm.1 | 0.0  | 0.756041 |
| TC1500000749.mm.1 | ENSMUST00000083907 | Gm25257 | predicted gene, 25257                           | 154979339 | 154979448 | TC0X00001573.mm.1 | -0.1 | 0.756109 |
| TC1500000751.mm.1 | NM_139225          | Defb10  | defensin beta 10                                | 21858901  | 21862011  | TC0800000262.mm.1 | 0.0  | 0.756357 |
| TC1500000756.mm.1 | ENSMUST00000121582 | Gm11438 | predicted gene 11438                            | 83681538  | 83681726  | TC1100003402.mm.1 | 0.0  | 0.75651  |
| TC1500000757.mm.1 | NM_026225          | Cog6    | component of oligomeric golgi complex 6         | 52982123  | 53017223  | TC0300001979.mm.1 | 0.0  | 0.756578 |
| TC1500000758.mm.1 | NM_001098841       | Gm13278 | predicted gene 13278                            | 88790895  | 88792357  | TC0400000898.mm.1 | 0.0  | 0.756821 |
| TC1500000760.mm.1 | NM_001145799       | Ctla2a  | cytotoxic T lymphocyte-associated protein 2 alp | 60934155  | 60936625  | TC1300002143.mm.1 | 0.1  | 0.756848 |
| TC1500000767.mm.1 | NR_035418          | Mir669h | microRNA 669h                                   | 10518155  | 10518279  | TC0200000205.mm.1 | 0.0  | 0.75703  |
| TC1500000773.mm.1 | NM_025829          | Eif4e3  | eukaryotic translation initiation factor 4E mem | 99625135  | 99666771  | TC0600003602.mm.1 | 0.0  | 0.757094 |
| TC1500000775.mm.1 | NM_053091          | Cox4i2  | cytochrome c oxidase subunit IV isoform 2       | 152754173 | 152765037 | TC0200002300.mm.1 | 0.0  | 0.75747  |
| TC1500000776.mm.1 | ENSMUST00000082814 | n-R5s28 | nuclear encoded rRNA 5S 28                      | 47848834  | 47848952  | TC1700000925.mm.1 | 0.2  | 0.757511 |
| TC1500000784.mm.1 | NM_176848          | Fbxo2   | F-box protein 2                                 | 148160621 | 148166424 | TC0400001926.mm.1 | 0.0  | 0.75769  |
| TC1500000791.mm.1 | ENSMUST00000179875 | Gm22188 | predicted gene, 22188                           | 59871864  | 59871957  | TC0700003327.mm.1 | 0.0  | 0.757756 |
| TC1500000794.mm.1 | NR_037244          | Mir3083 | microRNA 3083                                   | 26948056  | 26948119  | TC1700001713.mm.1 | 0.0  | 0.757821 |
| TC1500000797.mm.1 | NM_027320          | Ifi35   | interferon-induced protein 35                   | 101448407 | 101458701 | TC1100001657.mm.1 | 0.0  | 0.758042 |
| TC1500000801.mm.1 | NM_025272          | Atp6v0e | ATPase, H+ transporting, lysosomal VO subunit E | 26676396  | 26699647  | TC1700000418.mm.1 | 0.1  | 0.758054 |
| TC1500000819.mm.1 | NM_020268          | Klk1b27 | kallikrein 1-related peptidase b27              | 44052290  | 44056712  | TC0700000788.mm.1 | 0.0  | 0.75828  |
| TC1500000825.mm.1 | ENSMUST00000182028 | Gm8919  | predicted gene 8919                             | 11658497  | 11659510  | TC0300001654.mm.1 | 0.0  | 0.758364 |
| TC1500000826.mm.1 | NM_011527          | Tal1    | T cell acute lymphocytic leukemia 1             | 115056426 | 115071755 | TC0400001216.mm.1 | 0.0  | 0.75864  |
| TC1500000835.mm.1 | ENSMUST00000158505 | Gm24770 | predicted gene, 24770                           | 96945019  | 96945110  | TC1400001147.mm.1 | 0.0  | 0.758827 |
| TC1500000839.mm.1 | ENSMUST00000175012 | Gm26400 | predicted gene, 26400                           | 58938025  | 58938109  | TC0400000649.mm.1 | 0.0  | 0.758915 |
| TC1500000841.mm.1 | NM_172595          | Arl15   | ADP-ribosylation factor-like 15                 | 113794505 | 114157461 | TC1300001298.mm.1 | 0.0  | 0.759173 |
| TC1500000852.mm.1 | NM_013605          | Muc1    | mucin 1, transmembrane                          | 89229052  | 89233381  | TC0300000753.mm.1 | 0.0  | 0.759648 |
| TC1500000853.mm.1 | NM_146541          | Olfr136 | olfactory receptor 1361                         | 21658368  | 21659321  | TC1300001553.mm.1 | 0.0  | 0.759694 |
| TC1500000854.mm.1 | NM_001272035       | Slc33a1 | solute carrier family 33 (acetyl-CoA transporte | 63933507  | 63964768  | TC0300002074.mm.1 | 0.0  | 0.759809 |
| TC1500000857.mm.1 | ENSMUST00000122517 | Gm22960 | predicted gene, 22960                           | 46902589  | 46902692  | TC1300000537.mm.1 | 0.0  | 0.759894 |
| TC1500000860.mm.1 | NM_001080971       | Tubb1   | tubulin, beta 1 class VI                        | 174450595 | 174458380 | TC0200002706.mm.1 | -0.1 | 0.75998  |
| TC1500000862.mm.1 | ENSMUST00000118643 | Gm14921 | predicted gene 14921                            | 112660521 | 112661428 | TC0X00002873.mm.1 | 0.0  | 0.760026 |
| TC1500000870.mm.1 | ENSMUST00000170585 | Traj55  | T cell receptor alpha joining 55                | 54161439  | 54161501  | TC1400000727.mm.1 | 0.0  | 0.760068 |
| TC1500000886.mm.1 | ENSMUST00000175449 | Gm22875 | predicted gene, 22875                           | 24936831  | 24936956  | TC0200000390.mm.1 | 0.0  | 0.760095 |
| TC1500000891.mm.1 | ENSMUST00000130812 | Gm13113 | predicted gene 13113                            | 154837459 | 154839275 | TC0400002057.mm.1 | 0.0  | 0.760145 |
| TC1500000917.mm.1 | ENSMUST00000097146 | Gm10355 | predicted gene 10355                            | 101306561 | 101307079 | TC0300002599.mm.1 | 0.0  | 0.760246 |
| TC1500000921.mm.1 | NM_026579          | D10Wsu1 | DNA segment, Chr 10, Wayne State University 10  | 83360221  | 83368835  | TC1000000940.mm.1 | 0.0  | 0.760369 |
| TC1500000955.mm.1 | ENSMUST00000082621 | Gm24626 | predicted gene, 24626                           | 85829627  | 85829787  | TC0500000783.mm.1 | 0.1  | 0.760715 |
| TC1500000960.mm.1 | NM_028242          | Htatsf1 | HIV TAT specific factor 1                       | 57053570  | 57067183  | TC0X00000530.mm.1 | 0.0  | 0.760739 |
| TC1500000967.mm.1 | NM_001145929       | Thap3   | THAP domain containing, apoptosis associated p  | 151982638 | 151988997 | TC0400004083.mm.1 | 0.0  | 0.760795 |
| TC1500000968.mm.1 | XM_146296          | Gm4889  | predicted gene 4889                             | 34326934  | 34328395  | TC0800000406.mm.1 | 0.0  | 0.761083 |
| TC1500000971.mm.1 | ENSMUST00000104555 | n-R5s16 | nuclear encoded rRNA 5S 16                      | 155543290 | 155543408 | TC0X00001585.mm.1 | 0.0  | 0.76149  |

|                   |                    |         |                                                 |           |           |                   |      |          |
|-------------------|--------------------|---------|-------------------------------------------------|-----------|-----------|-------------------|------|----------|
| TC1500000974.mm.1 | NM_183154          | Zfyve1  | zinc finger, FYVE domain containing 1           | 83546930  | 83597147  | TC1200002049.mm.1 | 0.0  | 0.761507 |
| TC1500000982.mm.1 | ENSMUST00000182734 | Gm26950 | predicted gene, 26950                           | 48220204  | 48220840  | TC0700003066.mm.1 | 0.0  | 0.761557 |
| TC1500001001.mm.1 | ENSMUST00000177655 | Gm22290 | predicted gene, 22290                           | 105250010 | 105250116 | TC1400001199.mm.1 | -0.1 | 0.761652 |
| TC1500001002.mm.1 | NM_025790          | Acot13  | acyl-CoA thioesterase 13                        | 24817948  | 24831517  | TC1300001669.mm.1 | -0.1 | 0.761674 |
| TC1500001005.mm.1 | ENSMUST00000158840 | Gm23702 | predicted gene, 23702                           | 34960019  | 34960148  | TC0900000325.mm.1 | 0.0  | 0.761746 |
| TC1500001017.mm.1 | NM_173453          | Tmem11  | transmembrane protein 11                        | 60864452  | 60879272  | TC1100002899.mm.1 | 0.0  | 0.76177  |
| TC1500001019.mm.1 | NM_024211          | Slc25a1 | solute carrier family 25 (mitochondrial carrier | 70644019  | 70647479  | TC1100003106.mm.1 | 0.0  | 0.762048 |
| TC1500001022.mm.1 | ENSMUST00000169844 | Gm2959  | predicted gene, 2959                            | 42411451  | 42414526  | TC1400000426.mm.1 | 0.0  | 0.762154 |
| TC1500001023.mm.1 | ENSMUST00000099956 | Gm8055  | predicted pseudogene 8055                       | 40011866  | 40012873  | TC1000000342.mm.1 | 0.0  | 0.762164 |
| TC1500001024.mm.1 | NM_133658          | Ercc3   | excision repair cross-complementing rodent rep: | 32240300  | 32270151  | TC1800000259.mm.1 | -0.1 | 0.762208 |
| TC1500001040.mm.1 | ENSMUST00000116926 | Gm25171 | predicted gene, 25171                           | 103260883 | 103261003 | TC0700003882.mm.1 | 0.1  | 0.762633 |
| TC1500001041.mm.1 | ENSMUST00000116684 | Gm25110 | predicted gene, 25110                           | 84156757  | 84156877  | TC0800000949.mm.1 | 0.1  | 0.762633 |
| TC1500001046.mm.1 | ENSMUST00000116716 | Gm25775 | predicted gene, 25775                           | 3099386   | 3099506   | TC0800001606.mm.1 | 0.1  | 0.762633 |
| TC1500001051.mm.1 | ENSMUST00000116737 | Gm24795 | predicted gene, 24795                           | 39455015  | 39455135  | TC1600000569.mm.1 | 0.1  | 0.762633 |
| TC1500001061.mm.1 | ENSMUST00000104280 | Gm26416 | predicted gene, 26416                           | 31194205  | 31194338  | TC1500001319.mm.1 | 0.0  | 0.762634 |
| TC1500001065.mm.1 | ENSMUST00000182243 | Gm4217  | predicted gene 4217                             | 84866317  | 84867318  | TC1500000794.mm.1 | 0.0  | 0.762979 |
| TC1500001067.mm.1 | NM_172279          | Mark4   | MAP/microtubule affinity-regulating kinase 4    | 19426075  | 19458494  | TC0700002483.mm.1 | 0.0  | 0.763119 |
| TC1500001068.mm.1 | XM_003084736       | Scrap   | Snf2-related CREBBP activator protein           | 127511983 | 127567054 | TC0700001851.mm.1 | 0.0  | 0.763163 |
| TC1500001069.mm.1 | ENSMUST00000177616 | Gm21905 | predicted gene, 21905                           | 67927261  | 67946421  | TC0500002533.mm.1 | 0.0  | 0.763436 |
| TC1500001072.mm.1 | NM_025387          | Tmem14c | transmembrane protein 14C                       | 41016250  | 41022582  | TC1300000463.mm.1 | 0.0  | 0.764284 |
| TC1500001084.mm.1 | NM_010858          | MyI4    | myosin, light polypeptide 4                     | 104550663 | 104595753 | TC1100001728.mm.1 | 0.0  | 0.764324 |
| TC1500001085.mm.1 | ENSMUST00000082614 | n-R565  | nuclear encoded rRNA 5S 65                      | 90801619  | 90801735  | TC1200000936.mm.1 | 0.1  | 0.764517 |
| TC1500001088.mm.1 | ENSMUST00000178089 | Gm25244 | predicted gene, 25244                           | 90997862  | 90997993  | TC0400003041.mm.1 | 0.0  | 0.764737 |
| TC1500001089.mm.1 | ENSMUST00000116826 | Gm25316 | predicted gene, 25316                           | 10499966  | 10500083  | TC0200000166.mm.1 | 0.0  | 0.764853 |
| TC1500001093.mm.1 | NM_001198998       | Vdac3   | voltage-dependent anion channel 3               | 22577075  | 22593813  | TC0800001871.mm.1 | -0.1 | 0.765    |
| TC1500001095.mm.1 | NM_001011739       | Olfr885 | olfactory receptor 885                          | 38061322  | 38062251  | TC0900000383.mm.1 | 0.0  | 0.765561 |
| TC1500001101.mm.1 | XR_141059          | Gm20255 | predicted gene, 20255                           | 83997831  | 84000922  | TC1100001274.mm.1 | 0.0  | 0.765739 |
| TC1500001103.mm.1 | ENSMUST00000082859 | Gm24356 | predicted gene, 24356                           | 28123254  | 28123359  | TC0700000485.mm.1 | 0.0  | 0.766076 |
| TC1500001118.mm.1 | NM_146664          | Olfr734 | olfactory receptor 734                          | 50319836  | 50320868  | TC1400001981.mm.1 | 0.0  | 0.766159 |
| TC1500001119.mm.1 | ENSMUST00000179604 | Gm24957 | predicted gene, 24957                           | 112522529 | 112522660 | TC0900001496.mm.1 | 0.0  | 0.766229 |
| TC1500001120.mm.1 | NM_001025381       | Gpr17   | G protein-coupled receptor 17                   | 31942997  | 31949636  | TC1800001119.mm.1 | 0.0  | 0.766317 |
| TC1500001123.mm.1 | ENSMUST00000167127 | Gm4482  | predicted gene 4482                             | 122792581 | 122792775 | TC0600003076.mm.1 | 0.0  | 0.766506 |
| TC1500001127.mm.1 | NM_178614          | Samm50  | sorting and assembly machinery component 50 l   | 84192233  | 84214702  | TC1500000784.mm.1 | 0.0  | 0.766588 |
| TC1500001128.mm.1 | XM_001473314       | Gm20818 | predicted gene, 20818                           | 69017824  | 69018507  | TC0Y00000186.mm.1 | 0.0  | 0.766686 |
| TC1500001131.mm.1 | XM_003689123       | Gm21163 | predicted gene, 21163                           | 76575727  | 76576410  | TC0Y00000477.mm.1 | 0.0  | 0.766686 |
| TC1500001133.mm.1 | ENSMUST00000083696 | Gm24256 | predicted gene, 24256                           | 48619312  | 48619395  | TC1000002119.mm.1 | 0.0  | 0.766731 |
| TC1500001142.mm.1 | NM_008905          | Ppfibp2 | PTPRF interacting protein, binding protein 2 (l | 107595051 | 107748583 | TC0700001581.mm.1 | 0.0  | 0.766734 |
| TC1500001143.mm.1 | ENSMUST00000116877 | Gm23880 | predicted gene, 23880                           | 81586133  | 81586186  | TC1500000722.mm.1 | 0.0  | 0.766908 |
| TC1500001145.mm.1 | ENSMUST00000178264 | Gm21785 | predicted gene, 21785                           | 85453833  | 85454516  | TC0Y00000525.mm.1 | 0.0  | 0.767105 |
| TC1500001153.mm.1 | ENSMUST00000177729 | Gm21881 | predicted gene, 21881                           | 85814226  | 85814909  | TC0Y00000529.mm.1 | 0.0  | 0.767105 |
| TC1500001155.mm.1 | ENSMUST00000104481 | Gm24255 | predicted gene, 24255                           | 25238588  | 25238715  | TC1100002391.mm.1 | 0.0  | 0.767107 |
| TC1500001162.mm.1 | ENSMUST00000104495 | Gm22494 | predicted gene, 22494                           | 62611657  | 62611784  | TC0700000964.mm.1 | 0.0  | 0.767232 |
| TC1500001181.mm.1 | ENSMUST00000088299 | Atp5l   | ATP synthase, H+ transporting, mitochondrial FO | 24581458  | 24581879  | TC0500002086.mm.1 | 0.1  | 0.767419 |
| TC1500001189.mm.1 | NM_172529          | Gnptg   | N-acetylglucosamine-1-phosphotransferase, gar   | 25233331  | 25240124  | TC1700001655.mm.1 | 0.0  | 0.767472 |
| TC1500001192.mm.1 | NM_028261          | Tmem173 | transmembrane protein 173                       | 35733678  | 35740554  | TC1800001181.mm.1 | -0.1 | 0.767507 |
| TC1500001202.mm.1 | ENSMUST00000104008 | Gm22267 | predicted gene, 22267                           | 24894670  | 24894800  | TC0600001948.mm.1 | 0.0  | 0.767642 |
| TC1500001206.mm.1 | NM_001025086       | Rhox7   | reproductive homeobox 7                         | 37831686  | 37841275  | TC0X00000356.mm.1 | 0.0  | 0.767841 |
| TC1500001214.mm.1 | NM_022007          | Fxyd7   | FXYP domain-containing ion transport regulator  | 31042514  | 31051467  | TC0700002787.mm.1 | 0.0  | 0.768108 |
| TC1500001215.mm.1 | ENSMUST00000082725 | Gm26131 | predicted gene, 26131                           | 22861936  | 22862045  | TC0X00000235.mm.1 | 0.0  | 0.768708 |
| TC1500001220.mm.1 | ENSMUST00000104156 | Gm24326 | predicted gene, 24326                           | 27631803  | 27631927  | TC1200000231.mm.1 | 0.0  | 0.768785 |
| TC1500001226.mm.1 | ENSMUST00000082457 | Gm23625 | predicted gene, 23625                           | 65989640  | 65989739  | TC0600002410.mm.1 | 0.0  | 0.768809 |
| TC1500001230.mm.1 | NM_138743          | Smim11  | small integral membrane protein 11              | 92301286  | 92313041  | TC1600001025.mm.1 | 0.0  | 0.769141 |
| TC1500001234.mm.1 | ENSMUST00000179812 | Gm23561 | predicted gene, 23561                           | 21326548  | 21326639  | TC0800001843.mm.1 | 0.0  | 0.769479 |
| TC1500001248.mm.1 | NM_001267591       | Cant1   | calcium activated nucleotidase 1                | 118406289 | 118419118 | TC1100004160.mm.1 | 0.0  | 0.769498 |
| TC1500001251.mm.1 | ENSMUST00000157151 | Gm22322 | predicted gene, 22322                           | 132787225 | 132787335 | TC0300002969.mm.1 | 0.0  | 0.769562 |
| TC1500001252.mm.1 | NM_017464          | Nedd9   | neural precursor cell expressed, developmentall | 41309916  | 41487360  | TC1300001861.mm.1 | 0.1  | 0.769656 |
| TC1500001259.mm.1 | ENSMUST00000154873 | Tead3   | TEA domain family member 3                      | 28331671  | 28350805  | TC1700001755.mm.1 | 0.0  | 0.769705 |
| TC1500001262.mm.1 | NM_008457          | Klk1b8  | kallikrein 1-related peptidase b8               | 43950664  | 43954941  | TC0700000783.mm.1 | 0.0  | 0.769859 |
| TC1500001264.mm.1 | ENSMUST00000103981 | Gm25396 | predicted gene, 25396                           | 31466235  | 31466367  | TC1800001112.mm.1 | 0.0  | 0.770606 |
| TC1500001294.mm.1 | ENSMUST00000158389 | Gm25520 | predicted gene, 25520                           | 75101409  | 75101526  | TC0X00000736.mm.1 | 0.0  | 0.770689 |
| TC1500001295.mm.1 | ENSMUST00000177836 | Gm25615 | predicted gene, 25615                           | 59864240  | 59864333  | TC0700003324.mm.1 | 0.0  | 0.770722 |
| TC1500001299.mm.1 | NM_146182          | Klc3    | kinesin light chain 3                           | 19394437  | 19404104  | TC0700002481.mm.1 | 0.0  | 0.77103  |
| TC1500001300.mm.1 | NM_001039122       | Defb25  | defensin beta 25                                | 152622356 | 152623053 | TC0200004908.mm.1 | 0.0  | 0.771073 |
| TC1500001313.mm.1 | NM_020258          | Slc37a2 | solute carrier family 37 (glycerol-3-phosphate  | 37229149  | 37255738  | TC0900002044.mm.1 | -0.1 | 0.771218 |
| TC1500001315.mm.1 | ENSMUST00000119189 | Gm12673 | predicted gene 12673                            | 96170207  | 96170385  | TC0400003090.mm.1 | 0.0  | 0.771339 |
| TC1500001316.mm.1 | NM_146803          | Olfr906 | olfactory receptor 906                          | 38488031  | 38488966  | TC0900000403.mm.1 | 0.0  | 0.771373 |
| TC1500001319.mm.1 | ENSMUST00000184773 | mmu-mir | mmu-mir-8117                                    | 50252762  | 50252868  | TC0500000516.mm.1 | 0.0  | 0.771433 |
| TC1500001322.mm.1 | ENSMUST00000104432 | n-R5s9  | nuclear encoded rRNA 5S 9                       | 83345743  | 83345859  | TC0X00000812.mm.1 | 0.0  | 0.771834 |
| TC1500001323.mm.1 | ENSMUST00000082647 | Gm25133 | predicted gene, 25133                           | 96588827  | 96588956  | TC1400001146.mm.1 | -0.1 | 0.772015 |
| TC1500001326.mm.1 | ENSMUST00000105038 | Gm3550  | predicted gene 3550                             | 34736359  | 34738014  | TC0800002093.mm.1 | 0.0  | 0.772263 |
| TC1500001329.mm.1 | NM_019443          | Ndufa1  | NADH dehydrogenase (ubiquinone) 1 alpha subc    | 37187588  | 37191238  | TC0X00002061.mm.1 | 0.0  | 0.772547 |
| TC1500001363.mm.1 | NM_183032          | Rnase9  | ribonuclease, RNase A family, 9 (non-active)    | 51038459  | 51041869  | TC1400001995.mm.1 | 0.0  | 0.772622 |
| TC1500001367.mm.1 | NM_001110330       | Fiz1    | Flt3 interacting zinc finger protein 1          | 5007056   | 5014728   | TC0700002181.mm.1 | 0.0  | 0.772765 |
| TC1500001370.mm.1 | ENSMUST00000166227 | Gm17651 | predicted gene, 17651                           | 97673031  | 97674694  | TC0300002542.mm.1 | -0.1 | 0.772855 |
| TC1500001372.mm.1 | NM_001290148       | Snx29   | sorting nexin 29 (Snx29), transcript variant 2, | 0         | 0         | TSUnmapped000002  | -0.1 | 0.772919 |
| TC1500001376.mm.1 | ENSMUST00000082907 | Gm26205 | predicted gene, 26205                           | 121205010 | 121205143 | TC0500001354.mm.1 | -0.1 | 0.773035 |
| TC1500001379.mm.1 | ENSMUST00000121180 | Gm14993 | predicted gene 14993                            | 136367249 | 136367412 | TC0X00003028.mm.1 | 0.0  | 0.773086 |
| TC1500001384.mm.1 | NM_027829          | Izumo4  | IZUMO family member 4                           | 80702693  | 80705382  | TC1000000869.mm.1 | 0.0  | 0.773137 |

|                   |                    |         |                                                 |           |           |                    |      |          |
|-------------------|--------------------|---------|-------------------------------------------------|-----------|-----------|--------------------|------|----------|
| TC1500001385.mm.1 | NM_008744          | Ntn1    | netrin 1                                        | 68209364  | 68400823  | TC1100003013.mm.1  | 0.0  | 0.77351  |
| TC1500001402.mm.1 | XM_001472859       | Gm20810 | predicted gene, 20810                           | 28733498  | 28734181  | TC0Y000000086.mm.1 | 0.0  | 0.773514 |
| TC1500001403.mm.1 | NM_020044          | Lat2    | linker for activation of T cells family, member | 134600103 | 134615025 | TC0500003376.mm.1  | 0.0  | 0.773515 |
| TC1500001424.mm.1 | NM_001168508       | Mapk14  | mitogen-activated protein kinase 14             | 28691342  | 28748405  | TC1700000484.mm.1  | 0.0  | 0.773636 |
| TC1500001429.mm.1 | XR_105791          | Gm5965  | predicted gene 5965                             | 88777835  | 88778546  | TC1600000965.mm.1  | 0.0  | 0.773707 |
| TC1500001450.mm.1 | NR_028560          | Scarna1 | small Cajal body-specific RNA 17                | 74778391  | 74778469  | TC1800001590.mm.1  | -0.2 | 0.773887 |
| TC1500001458.mm.1 | NR_035449          | Mir1928 | microRNA 1928                                   | 74206554  | 74206620  | TC0100002581.mm.1  | 0.0  | 0.774077 |
| TC1500001461.mm.1 | ENSMUST00000104583 | Gm22374 | predicted gene, 22374                           | 129113295 | 129113426 | TC0800003212.mm.1  | 0.0  | 0.774188 |
| TC1500001469.mm.1 | ENSMUST00000118148 | Gm13592 | predicted gene 13592                            | 65277417  | 65278426  | TC0200000948.mm.1  | 0.0  | 0.774193 |
| TC1500001472.mm.1 | ENSMUST00000177910 | n-R5s10 | nuclear encoded rRNA 5S 101                     | 123540493 | 123540611 | TC0800003105.mm.1  | 0.1  | 0.774583 |
| TC1500001474.mm.1 | ENSMUST00000178297 | n-R5s11 | nuclear encoded rRNA 5S 114                     | 123562595 | 123562713 | TC0800003118.mm.1  | 0.1  | 0.774583 |
| TC1500001476.mm.1 | ENSMUST00000178861 | n-R5s11 | nuclear encoded rRNA 5S 119                     | 123571001 | 123571119 | TC0800003123.mm.1  | 0.1  | 0.774583 |
| TC1500001488.mm.1 | ENSMUST00000180122 | n-R5s12 | nuclear encoded rRNA 5S 129                     | 123587959 | 123588077 | TC0800003133.mm.1  | 0.1  | 0.774583 |
| TC1500001504.mm.1 | ENSMUST00000180280 | n-R5s13 | nuclear encoded rRNA 5S 131                     | 123591371 | 123591489 | TC0800003135.mm.1  | 0.1  | 0.774583 |
| TC1500001506.mm.1 | ENSMUST00000175591 | Gm22639 | predicted gene, 22639                           | 44865307  | 44865431  | TC0400000476.mm.1  | 0.0  | 0.774698 |
| TC1500001523.mm.1 | OTTMUST00000092478 | Cic     | ---                                             | 25267699  | 25294159  | TC07000000410.mm.1 | 0.0  | 0.77473  |
| TC1500001528.mm.1 | ENSMUST00000175372 | Gm22702 | predicted gene, 22702                           | 92024345  | 92024413  | TC1100003544.mm.1  | 0.0  | 0.774743 |
| TC1500001529.mm.1 | NM_013923          | Rnf19a  | ring finger protein 19A                         | 36239934  | 36283147  | TC1500001370.mm.1  | 0.0  | 0.774877 |
| TC1500001533.mm.1 | ENSMUST00000174930 | Gm24103 | predicted gene, 24103                           | 111041948 | 111042024 | TC0800002937.mm.1  | 0.1  | 0.775036 |
| TC1500001544.mm.1 | ENSMUST00000182270 | Gm27037 | predicted gene, 27037                           | 89943353  | 89944312  | TC1800001736.mm.1  | 0.0  | 0.775066 |
| TC1500001551.mm.1 | ENSMUST00000122557 | Gm23792 | predicted gene, 23792                           | 33981410  | 33981502  | TC0100002145.mm.1  | 0.0  | 0.775111 |
| TC1500001552.mm.1 | NM_013718          | Trappc3 | trafficking protein particle complex 3          | 126262325 | 126275883 | TC0400001458.mm.1  | 0.0  | 0.775205 |
| TC1500001560.mm.1 | ENSMUST00000104048 | Gm22439 | predicted gene, 22439                           | 104578945 | 104579076 | TC0200001563.mm.1  | 0.0  | 0.775328 |
| TC1500001566.mm.1 | NM_024210          | 2310033 | RIKEN cDNA 2310033P09 gene                      | 59208321  | 59210738  | TC1100000718.mm.1  | 0.0  | 0.775473 |
| TC1500001569.mm.1 | NR_039563          | Mir5104 | microRNA 5104                                   | 7836381   | 7836474   | TC1000000057.mm.1  | 0.1  | 0.775477 |
| TC1500001581.mm.1 | NM_008925          | PrkcsH  | protein kinase C substrate 80K-H                | 22003018  | 22014222  | TC0900000210.mm.1  | 0.0  | 0.775525 |
| TC1500001596.mm.1 | NM_028372          | Mblac2  | metallo-beta-lactamase domain containing 2      | 81711417  | 81753275  | TC1300000967.mm.1  | 0.0  | 0.775821 |
| TC1500001600.mm.1 | ENSMUST00000103902 | Gm22117 | predicted gene, 22117                           | 60211185  | 60211251  | TC1000002231.mm.1  | 0.0  | 0.776058 |
| TC1500001606.mm.1 | ENSMUST00000164420 | Gm17131 | predicted gene 17131                            | 127878531 | 127882376 | TC0500001490.mm.1  | 0.1  | 0.776134 |
| TC1500001609.mm.1 | NM_146370          | Olfr47  | olfactory receptor 47                           | 43235578  | 43236636  | TC0600000486.mm.1  | 0.0  | 0.776158 |
| TC1500001613.mm.1 | ENSMUST00000158771 | Gm23027 | predicted gene, 23027                           | 76036459  | 76036616  | TC1500000571.mm.1  | 0.0  | 0.776463 |
| TC1500001642.mm.1 | NM_145834          | Il17c   | interleukin 17C                                 | 122422020 | 122423639 | TC0800001487.mm.1  | 0.0  | 0.776489 |
| TC1500001645.mm.1 | NM_198642          | 5031414 | RIKEN cDNA 5031414D18 gene                      | 75016027  | 75052532  | TC1400001052.mm.1  | -0.1 | 0.776672 |
| TC1500001656.mm.1 | ENSMUST00000181051 | Gm2574  | predicted pseudogene 2574                       | 142962561 | 142963792 | TC0300001453.mm.1  | 0.1  | 0.776825 |
| TC1500001669.mm.1 | ENSMUST00000184096 | AC12417 | N/A                                             | 121084609 | 121084706 | TC0800003045.mm.1  | 0.0  | 0.776837 |
| TC1500001673.mm.1 | ENSMUST00000050914 | LOC1010 | uncharacterized LOC101055747                    | 108940053 | 108940445 | TC0300002758.mm.1  | 0.0  | 0.776938 |
| TC1500001678.mm.1 | NM_011337          | Ccl3    | chemokine (C-C motif) ligand 3                  | 83647843  | 83649378  | TC1100003401.mm.1  | 0.0  | 0.777096 |
| TC1500001680.mm.1 | NM_020293          | Cldn9   | claudin 9                                       | 23682584  | 23684026  | TC1700001599.mm.1  | 0.0  | 0.777142 |
| TC1500001684.mm.1 | NM_018778          | Cldn8   | claudin 8                                       | 88560826  | 88563183  | TC1600002005.mm.1  | 0.0  | 0.777604 |
| TC1500001697.mm.1 | ENSMUST00000180054 | Gm24694 | predicted gene, 24694                           | 16013818  | 16013927  | TC0300000101.mm.1  | 0.0  | 0.777783 |
| TC1500001702.mm.1 | ENSMUST00000184839 | AC13259 | N/A                                             | 5542752   | 5542861   | TC0Y00000018.mm.1  | 0.0  | 0.777783 |
| TC1500001704.mm.1 | ENSMUST00000182698 | Gm4398  | predicted gene 4398                             | 32791496  | 32792487  | TC0700000604.mm.1  | 0.0  | 0.777794 |
| TC1500001705.mm.1 | ENSMUST00000178535 | Gm26032 | predicted gene, 26032                           | 59741373  | 59741466  | TC0700003295.mm.1  | 0.0  | 0.778036 |
| TC1500001712.mm.1 | ENSMUST00000179027 | Gm22046 | predicted gene, 22046                           | 59748956  | 59749049  | TC0700003298.mm.1  | 0.0  | 0.778036 |
| TC1500001713.mm.1 | ENSMUST00000180126 | Gm25471 | predicted gene, 25471                           | 59761554  | 59761647  | TC0700003303.mm.1  | 0.0  | 0.778036 |
| TC1500001718.mm.1 | ENSMUST00000178813 | Gm25210 | predicted gene, 25210                           | 59769138  | 59769231  | TC0700003306.mm.1  | 0.0  | 0.778036 |
| TC1500001720.mm.1 | NM_153504          | Rnf183  | ring finger protein 183                         | 62427540  | 62435252  | TC0400002788.mm.1  | 0.0  | 0.778288 |
| TC1500001727.mm.1 | ENSMUST00000178360 | Gm14121 | predicted gene 14121                            | 150499466 | 150500845 | TC0200004840.mm.1  | 0.0  | 0.778353 |
| TC1500001728.mm.1 | NM_133706          | Tmem97  | transmembrane protein 97                        | 78541817  | 78550777  | TC1100003300.mm.1  | 0.0  | 0.778495 |
| TC1500001729.mm.1 | ENSMUST00000133758 | 2610020 | RIKEN cDNA 2610020H08 gene                      | 119794006 | 119848943 | TC0700001716.mm.1  | 0.0  | 0.778562 |
| TC1500001730.mm.1 | ENSMUST00000113255 | Gm11115 | predicted gene 11115                            | 88154023  | 88154099  | TC0500002709.mm.1  | -0.1 | 0.778845 |
| TC1500001733.mm.1 | ENSMUST00000178645 | AC13310 | N/A                                             | 226405    | 229375    | TC1_GL456211_rand  | -0.1 | 0.779047 |
| TC1500001736.mm.1 | NM_023456          | Npy     | neuropeptide Y                                  | 49822710  | 49829507  | TC0600000588.mm.1  | 0.0  | 0.779115 |
| TC1500001743.mm.1 | ENSMUST00000158057 | Gm23999 | predicted gene, 23999                           | 29009696  | 29009799  | TC1400001645.mm.1  | 0.0  | 0.779213 |
| TC1500001744.mm.1 | ENSMUST00000083861 | Gm25513 | predicted gene, 25513                           | 55303420  | 55303581  | TC0500002435.mm.1  | 0.0  | 0.779273 |
| TC1500001746.mm.1 | NM_008377          | Lrig1   | leucine-rich repeats and immunoglobulin-like do | 94604529  | 94700158  | TC0600002773.mm.1  | 0.0  | 0.779276 |
| TC1500001754.mm.1 | NM_030218          | Misp    | mitotic spindle positioning                     | 79821021  | 79830490  | TC1000000819.mm.1  | 0.0  | 0.779546 |
| TC1500001760.mm.1 | NM_146374          | Olfr368 | olfactory receptor 368                          | 37331749  | 37332733  | TC0200000685.mm.1  | 0.0  | 0.779725 |
| TC1500001762.mm.1 | XR_001595          | Gm5946  | predicted gene 5946                             | 150220709 | 150228504 | TC0X00003156.mm.1  | 0.0  | 0.779768 |
| TC1500001768.mm.1 | NM_027404          | Bag5    | BCL2-associated athanogene 5                    | 111709488 | 111713257 | TC1200002413.mm.1  | 0.0  | 0.779961 |
| TC1500001780.mm.1 | ENSMUST00000158639 | Gm22889 | predicted gene, 22889                           | 127677670 | 127677727 | TC0200001919.mm.1  | 0.0  | 0.780167 |
| TC1500001782.mm.1 | ENSMUST00000179031 | Gm25598 | predicted gene, 25598                           | 15837549  | 15837655  | TC1700001507.mm.1  | 0.1  | 0.780456 |
| TC1500001785.mm.1 | NM_153121          | Lysmd1  | LysM, putative peptidoglycan-binding, domain c  | 95134088  | 95139525  | TC0300000890.mm.1  | 0.0  | 0.780494 |
| TC1500001798.mm.1 | NM_001080979       | Tead4   | TEA domain family member 4                      | 128224288 | 128300823 | TC0600003196.mm.1  | 0.0  | 0.7806   |
| TC1500001803.mm.1 | ENSMUST00000175182 | Gm24561 | predicted gene, 24561                           | 168178158 | 168178252 | TC0200005210.mm.1  | 0.0  | 0.780662 |
| TC1500001811.mm.1 | ENSMUST00000103800 | mmu-mir | mmu-mir-297a-1                                  | 10958437  | 10958512  | TC0700002321.mm.1  | 0.0  | 0.780704 |
| TC1500001824.mm.1 | XM_001476172       | Gm3159  | predicted gene 3159                             | 4397526   | 4406347   | TC1400000024.mm.1  | 0.0  | 0.780765 |
| TC1500001826.mm.1 | ENSMUST00000083013 | Gm23790 | predicted gene, 23790                           | 31163526  | 31163632  | TC1000001951.mm.1  | 0.0  | 0.780775 |
| TC1500001828.mm.1 | NM_145359          | Ubald1  | UBA-like domain containing 1                    | 4874778   | 4880315   | TC1600001143.mm.1  | 0.0  | 0.780848 |
| TC1500001831.mm.1 | NM_001146000       | Zfp710  | zinc finger protein 710                         | 80024814  | 80092751  | TC0700001141.mm.1  | 0.0  | 0.780874 |
| TC1500001833.mm.1 | NM_021390          | Sall1   | sal-like 1 (Drosophila)                         | 89027242  | 89044162  | TC0800002665.mm.1  | 0.0  | 0.781014 |
| TC1500001838.mm.1 | NM_011390          | Slc12a7 | solute carrier family 12, member 7              | 73733094  | 73816743  | TC1300000887.mm.1  | 0.0  | 0.781156 |
| TC1500001849.mm.1 | NM_183139          | Pld6    | phospholipase D family, member 6                | 59783893  | 59787657  | TC1100002861.mm.1  | 0.0  | 0.781357 |
| TC1500001853.mm.1 | NR_039554          | Mir3473 | microRNA 3473b                                  | 41670739  | 41670793  | TC1000000370.mm.1  | 0.0  | 0.781383 |
| TC1500001859.mm.1 | NR_039554          | Mir3473 | microRNA 3473b                                  | 0         | 0         | TSUnmapped0000008  | 0.0  | 0.781383 |
| TC1500001871.mm.1 | ENSMUST00000082574 | n-R5s96 | nuclear encoded rRNA 5S 96                      | 47719246  | 47719369  | TC0800000557.mm.1  | -0.1 | 0.781494 |
| TC1500001878.mm.1 | NM_016968          | Olig1   | oligodendrocyte transcription factor 1          | 91269769  | 91271939  | TC1600000999.mm.1  | 0.0  | 0.781513 |
| TC1500001880.mm.1 | NM_001166742       | Vmn1r11 | vomer nasal 1 receptor 118                      | 20911427  | 20912347  | TC0700002531.mm.1  | 0.0  | 0.781594 |

|                   |                    |         |                                                 |           |           |                    |      |          |
|-------------------|--------------------|---------|-------------------------------------------------|-----------|-----------|--------------------|------|----------|
| TC1500001883.mm.1 | ENSMUST00000181201 | Gm7713  | predicted gene 7713                             | 59993886  | 59994892  | TC1500001600.mm.1  | 0.0  | 0.781613 |
| TC1500001891.mm.1 | ENSMUST00000175576 | Gm25470 | predicted gene, 25470                           | 15404981  | 15405091  | TC0600000113.mm.1  | 0.0  | 0.781901 |
| TC1500001896.mm.1 | NM_007444          | Amd2    | S-adenosylmethionine decarboxylase 2            | 35708691  | 35711891  | TC1000002003.mm.1  | 0.0  | 0.782389 |
| TC1500001897.mm.1 | ENSMUST00000082509 | Gm26226 | predicted gene, 26226                           | 140918684 | 140918799 | TC0400001771.mm.1  | -0.1 | 0.782612 |
| TC1500001898.mm.1 | NM_133193          | Il1rl2  | interleukin 1 receptor-like 2                   | 40324627  | 40365471  | TC0100000297.mm.1  | 0.0  | 0.782865 |
| TC1500001899.mm.1 | OTTMUST00000025659 | RP23-13 | ---                                             | 148068031 | 148068492 | TC04000004010.mm.1 | -0.1 | 0.782878 |
| TC1500001900.mm.1 | NCBI_Gene:640506:p | Ighv8-5 | immunoglobulin heavy variable V8-5              | 115067560 | 115067996 | TC1200002627.mm.1  | -0.1 | 0.782888 |
| TC1500001905.mm.1 | NM_177771          | Klhl18  | kelch-like 18                                   | 110476694 | 110476694 | TC0900003112.mm.1  | 0.0  | 0.782894 |
| TC1500001919.mm.1 | ENSMUST00000184108 | AL66990 | N/A                                             | 48644340  | 48644458  | TC0X00000438.mm.1  | 0.0  | 0.782927 |
| TC1500001923.mm.1 | ENSMUST00000101995 | Gm25823 | predicted gene, 25823                           | 59522156  | 59522233  | TC0700003218.mm.1  | 0.0  | 0.783051 |
| TC1500001927.mm.1 | ENSMUST00000101832 | Gm25647 | predicted gene, 25647                           | 59524028  | 59524105  | TC0700003219.mm.1  | 0.0  | 0.783051 |
| TC1500001930.mm.1 | NM_001033342       | Cdc42bp | CDC42 binding protein kinase gamma (DMPK-like)  | 6306456   | 6325652   | TC1900000112.mm.1  | 0.0  | 0.783114 |
| TC1500001932.mm.1 | ENSMUST00000175490 | Gm25297 | predicted gene, 25297                           | 109320970 | 109321036 | TC1200002367.mm.1  | -0.1 | 0.783155 |
| TC1500001939.mm.1 | ENSMUST00000178609 | Gm12396 | predicted gene 12396                            | 40775133  | 40775725  | TC0400002448.mm.1  | 0.1  | 0.783252 |
| TC1500001940.mm.1 | ENSMUST00000179100 | Gm24088 | predicted gene, 24088                           | 59410933  | 59411011  | TC0700003161.mm.1  | 0.0  | 0.783383 |
| TC1500001942.mm.1 | NR_037306          | Mir3471 | microRNA 3471-2                                 | 3537090   | 3537191   | TC0400000010.mm.1  | 0.1  | 0.783428 |
| TC1500001944.mm.1 | NR_037306          | Mir3471 | microRNA 3471-2                                 | 0         | 0         | TSUnmapped0000012  | 0.1  | 0.783428 |
| TC1500001945.mm.1 | NM_198615          | Mex3d   | mex3 homolog D (C. elegans)                     | 80380355  | 80387659  | TC1000002498.mm.1  | 0.0  | 0.783515 |
| TC1500001946.mm.1 | NM_134078          | Chmp7   | charged multivesicular body protein 7           | 69716979  | 69732570  | TC1400002327.mm.1  | 0.0  | 0.78371  |
| TC1500001948.mm.1 | NM_001082545       | Stfa2   | stefin A2                                       | 36403946  | 36408457  | TC1600001574.mm.1  | 0.0  | 0.783743 |
| TC1500001951.mm.1 | NM_028157          | Spta31  | spermatogenesis associated 31 subfamily D, mer  | 59700083  | 59706197  | TC1300002121.mm.1  | 0.0  | 0.784049 |
| TC1500001957.mm.1 | NM_009402          | Pglyrp1 | peptidoglycan recognition protein 1             | 18884680  | 18890441  | TC0700000275.mm.1  | 0.0  | 0.784112 |
| TC1500001963.mm.1 | NM_172285          | Plcg2   | phospholipase C, gamma 2                        | 117498291 | 117635142 | TC0800001407.mm.1  | -0.1 | 0.784331 |
| TC1500001965.mm.1 | ENSMUST00000083731 | Gm22577 | predicted gene, 22577                           | 92962008  | 92962116  | TC0300002417.mm.1  | 0.0  | 0.784691 |
| TC1500001968.mm.1 | ENSMUST00000104594 | Gm24160 | predicted gene, 24160                           | 79513739  | 79513864  | TC0100002641.mm.1  | 0.1  | 0.784766 |
| TC1500001971.mm.1 | XM_983617          | Gm4943  | predicted pseudogene 4943                       | 22053504  | 22053935  | TC1600000308.mm.1  | 0.0  | 0.784833 |
| TC1500001973.mm.1 | ENSMUST00000158053 | Gm23666 | predicted gene, 23666                           | 53006408  | 53006523  | TC0800000582.mm.1  | 0.0  | 0.785059 |
| TC1500001975.mm.1 | ENSMUST00000175476 | Gm25246 | predicted gene, 25246                           | 13653381  | 13653449  | TC0X00000170.mm.1  | 0.0  | 0.785694 |
| TC1500001978.mm.1 | NM_007880          | Arid3a  | AT rich interactive domain 3A (BRIGHT-like)     | 79927043  | 79955018  | TC1000000829.mm.1  | 0.0  | 0.785834 |
| TC1500001979.mm.1 | ENSMUST00000104117 | Gm22470 | predicted gene, 22470                           | 17034662  | 17034791  | TC1800000145.mm.1  | 0.0  | 0.785873 |
| TC1500001986.mm.1 | ENSMUST00000175605 | Gm26115 | predicted gene, 26115                           | 4215402   | 4215488   | TC1900000910.mm.1  | 0.0  | 0.785909 |
| TC1500002001.mm.1 | NM_133916          | Eif3b   | eukaryotic translation initiation factor 3, sub | 140419305 | 140443360 | TC0500001692.mm.1  | 0.0  | 0.785965 |
| TC1500002007.mm.1 | NM_029070          | Cldn26  | claudin 26                                      | 8409276   | 8425136   | TC1600001168.mm.1  | 0.0  | 0.786007 |
| TC1500002010.mm.1 | NR_029559          | Mir149  | microRNA 149                                    | 92850378  | 92850443  | TC0100000917.mm.1  | 0.0  | 0.786035 |
| TC1500002014.mm.1 | NM_144872          | Eml3    | echinoderm microtubule associated protein like  | 8929675   | 8941582   | TC1900000167.mm.1  | 0.0  | 0.786234 |
| TC1500002038.mm.1 | NM_022985          | Zfand6  | zinc finger, AN1-type domain 6                  | 84615049  | 84689853  | TC0700003658.mm.1  | 0.0  | 0.786252 |
| TC1500002039.mm.1 | NM_001001447       | Zscan22 | zinc finger and SCAN domain containing 22       | 12897815  | 12909083  | TC0700000150.mm.1  | 0.0  | 0.786328 |
| TC1500002050.mm.1 | NM_026268          | Dusp6   | dual specificity phosphatase 6                  | 99263231  | 99267489  | TC1000001207.mm.1  | 0.0  | 0.786455 |
| TC1500002052.mm.1 | ENSMUST00000101881 | Gm23692 | predicted gene, 23692                           | 94429073  | 94429232  | TC1600001060.mm.1  | 0.0  | 0.786528 |
| TC1500002062.mm.1 | NM_022884          | Bhmt2   | betaine-homocysteine methyltransferase 2        | 93655720  | 93674302  | TC1300002437.mm.1  | 0.0  | 0.786625 |
| TC1500002063.mm.1 | XM_001473811       | Gm20824 | predicted gene, 20824                           | 8257892   | 8283913   | TC0Y00000024.mm.1  | 0.0  | 0.786676 |
| TC1500002069.mm.1 | ENSMUST00000168137 | 5830462 | RIKEN cDNA 5830462I19 gene                      | 110372048 | 110375430 | TC0900003109.mm.1  | 0.0  | 0.786756 |
| TC1500002071.mm.1 | ENSMUST00000178431 | Gm24799 | predicted gene, 24799                           | 59409063  | 59409141  | TC0700003160.mm.1  | 0.0  | 0.786881 |
| TC1500002092.mm.1 | NM_133256          | Gsx2    | G5 homeobox 2                                   | 75075464  | 75077893  | TC0500000707.mm.1  | 0.0  | 0.787523 |
| TC1500002100.mm.1 | NM_146223          | Cplx3   | complexin 3                                     | 57599992  | 57606281  | TC0900002375.mm.1  | 0.0  | 0.787537 |
| TC1500002110.mm.1 | ENSMUST00000158233 | Gm24723 | predicted gene, 24723                           | 20842535  | 20842666  | TC0100002034.mm.1  | 0.0  | 0.787648 |
| TC1500002112.mm.1 | NM_027457          | Tmem242 | transmembrane protein 242                       | 5410864   | 5440260   | TC1700001366.mm.1  | 0.0  | 0.787858 |
| TC1500002114.mm.1 | NM_001177525       | EU59904 | expressed sequence EU599041                     | 43214039  | 43226842  | TC0700000755.mm.1  | 0.0  | 0.788076 |
| TC1500002130.mm.1 | NM_001277875       | Tpm2    | tropomyosin 2, beta                             | 43513726  | 43523765  | TC0400002529.mm.1  | 0.0  | 0.788079 |
| TC1500002145.mm.1 | NM_008269          | Hoxb6   | homeobox B6                                     | 96292476  | 96301569  | TC1100001495.mm.1  | 0.0  | 0.788114 |
| TC1500002147.mm.1 | NM_026618          | Coa3    | cytochrome C oxidase assembly factor 3          | 101277968 | 101279114 | TC1100003799.mm.1  | 0.0  | 0.788178 |
| TC1500002154.mm.1 | XR_104749          | 4930518 | RIKEN cDNA 4930518I15 gene                      | 156856615 | 156858069 | TC0200005002.mm.1  | 0.0  | 0.788556 |
| TC1500002155.mm.1 | ENSMUST00000061991 | Gm5763  | predicted pseudogene 5763                       | 142631483 | 142634015 | TC0X00003106.mm.1  | 0.0  | 0.788587 |
| TC1500002158.mm.1 | ENSMUST00000158531 | Gm23581 | predicted gene, 23581                           | 63508169  | 63508231  | TC1800000651.mm.1  | 0.0  | 0.78877  |
| TC1500002159.mm.1 | ENSMUST00000175190 | Gm22904 | predicted gene, 22904                           | 33062441  | 33062600  | TC1200000285.mm.1  | 0.0  | 0.789311 |
| TC1500002177.mm.1 | NM_001081074       | A1cf    | APOBEC1 complementation factor                  | 31868761  | 31949406  | TC1900000461.mm.1  | 0.0  | 0.789391 |
| TC1500002179.mm.1 | ENSMUST00000135189 | Gm16362 | predicted gene 16362                            | 176452627 | 176452840 | TC0200005348.mm.1  | 0.0  | 0.790028 |
| TC1500002181.mm.1 | NM_023557          | Slc44a4 | solute carrier family 44, member 4              | 34914466  | 34930436  | TC1700000651.mm.1  | 0.0  | 0.790141 |
| TC1500002191.mm.1 | NM_011867          | Slc26a4 | solute carrier family 26, member 4              | 31519819  | 31559969  | TC1200001595.mm.1  | 0.0  | 0.79021  |
| TC1500002199.mm.1 | NM_001042489       | Hvcn1   | hydrogen voltage-gated channel 1                | 122206804 | 122242297 | TC0500001382.mm.1  | 0.1  | 0.790338 |
| TC1500002200.mm.1 | ENSMUST00000082942 | Gm23378 | predicted gene, 23378                           | 104001373 | 104001479 | TC0X00002792.mm.1  | 0.0  | 0.790406 |
| TC1500002203.mm.1 | ENSMUST00000104436 | Gm23834 | predicted gene, 23834                           | 137025684 | 137025812 | TC0400001698.mm.1  | 0.0  | 0.790544 |
| TC1500002204.mm.1 | ENSMUST00000158645 | Gm24551 | predicted gene, 24551                           | 149566194 | 149566285 | TC0200004821.mm.1  | 0.0  | 0.79084  |
| TC1500002205.mm.1 | XR_140474          | Gm9982  | predicted gene 9982                             | 178256103 | 178257301 | TC0100001684.mm.1  | 0.0  | 0.79091  |
| TC1500002206.mm.1 | ENSMUST00000104009 | Gm22268 | predicted gene, 22268                           | 76132541  | 76132671  | TC1600001920.mm.1  | 0.0  | 0.791242 |
| TC1500002210.mm.1 | NM_009943          | Cox6a2  | cytochrome c oxidase subunit VIa polypeptide 2  | 128205435 | 128206366 | TC0700004358.mm.1  | 0.0  | 0.791435 |
| TC1500002215.mm.1 | ENSMUST00000083766 | Gm22827 | predicted gene, 22827                           | 112062505 | 112062611 | TC0800001344.mm.1  | 0.0  | 0.791725 |
| TC1500002219.mm.1 | ENSMUST00000083308 | Gm22294 | predicted gene, 22294                           | 17325315  | 17325418  | TC0X00000184.mm.1  | 0.0  | 0.791834 |
| TC1500002221.mm.1 | NM_134002          | Csnk1g2 | casein kinase 1, gamma 2                        | 80622780  | 80640771  | TC1000000866.mm.1  | -0.1 | 0.792039 |
| TC1500002224.mm.1 | ENSMUST00000104171 | Gm25308 | predicted gene, 25308                           | 118077805 | 118077962 | TC0200004405.mm.1  | 0.0  | 0.792083 |
| TC1500002228.mm.1 | XM_003688914       | Gm3642  | predicted gene 3642                             | 6087295   | 6108665   | TC1400002841.mm.1  | 0.0  | 0.792205 |
| TC1500002233.mm.1 | NM_026468          | Atp5g2  | ATP synthase, H+ transporting, mitochondrial FO | 102662864 | 102671047 | TC1500002299.mm.1  | -0.1 | 0.792242 |
| TC1500002238.mm.1 | NM_021281          | Ctss    | cathepsin S                                     | 95526786  | 95556405  | TC0300000903.mm.1  | 0.1  | 0.792267 |
| TC1500002240.mm.1 | NM_175109          | Rps19bp | ribosomal protein S19 binding protein 1         | 80260614  | 80264306  | TC1500001905.mm.1  | 0.0  | 0.7924   |
| TC1500002249.mm.1 | NR_033512          | Gm6194  | transmembrane protein 189 pseudogene            | 8461387   | 8463098   | TC0300001614.mm.1  | 0.0  | 0.792435 |
| TC1500002250.mm.1 | ENSMUST00000157856 | Gm23644 | predicted gene, 23644                           | 77105209  | 77105285  | TC0300002176.mm.1  | 0.0  | 0.792531 |
| TC1500002263.mm.1 | NM_021500          | Maea    | macrophage erythroblast attacher                | 33335572  | 33373294  | TC0500000356.mm.1  | 0.0  | 0.792715 |
| TC1500002264.mm.1 | NM_026454          | Ube2f   | ubiquitin-conjugating enzyme E2F (putative)     | 91250311  | 91288877  | TC0100000890.mm.1  | 0.0  | 0.793208 |

|                   |                    |         |                                                 |           |           |                   |      |          |
|-------------------|--------------------|---------|-------------------------------------------------|-----------|-----------|-------------------|------|----------|
| TC1500002265.mm.1 | ENSMUST00000121760 | Gm5863  | predicted gene 5863                             | 120160710 | 120161717 | TC0X00001176.mm.1 | 0.0  | 0.793219 |
| TC1500002268.mm.1 | ENSMUST00000183005 | Gm8984  | predicted gene 8984                             | 16508165  | 16509183  | TC0500001986.mm.1 | 0.0  | 0.793268 |
| TC1500002269.mm.1 | NM_001164202       | Gm8369  | predicted gene 8369                             | 11492038  | 11512577  | TC1900000224.mm.1 | -0.1 | 0.79351  |
| TC1500002276.mm.1 | NM_008393          | Irx3    | Iroquois related homeobox 3 (Drosophila)        | 91798511  | 91802067  | TC0800002690.mm.1 | 0.0  | 0.793664 |
| TC1500002279.mm.1 | ENSMUST00000183341 | 5S_rRNA | 5S ribosomal RNA                                | 96495132  | 96495213  | TC0900002882.mm.1 | 0.0  | 0.793668 |
| TC1500002282.mm.1 | ENSMUST00000158734 | Gm25490 | predicted gene, 25490                           | 15452422  | 15452551  | TC1100000152.mm.1 | 0.0  | 0.793845 |
| TC1500002285.mm.1 | ENSMUST00000177688 | n-R5s21 | nuclear encoded rRNA 5S 210                     | 37005439  | 37005557  | TC0100000256.mm.1 | 0.2  | 0.794024 |
| TC1500002288.mm.1 | NR_035413          | Mir1b   | microRNA 1b                                     | 10785446  | 10785567  | TC1800000087.mm.1 | 0.0  | 0.794388 |
| TC1500002298.mm.1 | ENSMUST00000083188 | Gm26126 | predicted gene, 26126                           | 84649496  | 84649659  | TC0900001106.mm.1 | 0.0  | 0.794406 |
| TC1500002299.mm.1 | NM_007530          | Bcap29  | B cell receptor associated protein 29           | 31595354  | 31634658  | TC1200001597.mm.1 | 0.0  | 0.794745 |
| TC1500002300.mm.1 | ENSMUST00000158637 | Gm22893 | predicted gene, 22893                           | 85150336  | 85150451  | TC0600000956.mm.1 | 0.0  | 0.795042 |
| TC1500002317.mm.1 | NR_003628          | Gm5766  | ribosomal protein L7a pseudogene                | 4229229   | 4231206   | TC1600000023.mm.1 | 0.0  | 0.795482 |
| TC1500002318.mm.1 | NM_172462          | Zfp11   | zinc finger protein 11                          | 129654593 | 129670099 | TC0500003305.mm.1 | 0.0  | 0.795621 |
| TC1500002323.mm.1 | ENSMUST00000104819 | Gm23487 | predicted gene, 23487                           | 93898042  | 93898133  | TC0200001457.mm.1 | 0.1  | 0.795868 |
| TC1500002324.mm.1 | NM_008396          | Itga2   | integrin alpha 2                                | 114835912 | 114932041 | TC1300002715.mm.1 | 0.0  | 0.795873 |
| TC1500002326.mm.1 | NR_035480          | Mir1955 | microRNA 1955                                   | 92191977  | 92192074  | TC0200001397.mm.1 | 0.0  | 0.795948 |
| TC1500002328.mm.1 | ENSMUST00000083948 | n-R5s16 | nuclear encoded rRNA 5S 168                     | 140319630 | 140319733 | TC0600001652.mm.1 | 0.1  | 0.796062 |
| TC1500002333.mm.1 | ENSMUST00000104118 | Gm22469 | predicted gene, 22469                           | 37224869  | 37225001  | TC1400000394.mm.1 | 0.0  | 0.796177 |
| TC1500002336.mm.1 | NM_206867          | Gm13280 | predicted gene 13280                            | 88675915  | 88676924  | TC0400003011.mm.1 | 0.0  | 0.796188 |
| TC1500002337.mm.1 | NM_008328          | Ifi203  | interferon activated gene 203                   | 173920400 | 173942672 | TC0100003891.mm.1 | 0.1  | 0.796201 |
| TC1500002339.mm.1 | NR_004447          | Gm5523  | glyceraldehyde-3-phosphate dehydrogenase pse    | 13785685  | 13786929  | TC0100001983.mm.1 | 0.1  | 0.79665  |
| TC1500002346.mm.1 | ENSMUST00000183460 | adapt33 | Adaptive response 33 conserved region 1         | 100421968 | 100422041 | TC0500000976.mm.1 | 0.0  | 0.796802 |
| TC1500002347.mm.1 | NM_146219          | Klhl36  | kelch-like 36                                   | 119862305 | 119876989 | TC0800001429.mm.1 | 0.0  | 0.79684  |
| TC1500002348.mm.1 | ENSMUST00000158650 | Gm24548 | predicted gene, 24548                           | 58154981  | 58155088  | TC0100002377.mm.1 | 0.0  | 0.797075 |
| TC1600000003.mm.1 | XM_001476166       | Gm20884 | predicted gene, 20884                           | 51391032  | 51391845  | TC0Y00000362.mm.1 | 0.0  | 0.797132 |
| TC1600000023.mm.1 | XM_003689082       | Gm21654 | predicted gene, 21654                           | 64012307  | 64013120  | TC0Y00000421.mm.1 | 0.0  | 0.797132 |
| TC1600000033.mm.1 | ENSMUST00000182273 | Gm26931 | predicted gene, 26931                           | 34481914  | 34482522  | TC0500002237.mm.1 | 0.0  | 0.797138 |
| TC1600000038.mm.1 | XR_104651          | Gm13199 | predicted gene 13199                            | 5861876   | 5862934   | TC0200002882.mm.1 | 0.0  | 0.797301 |
| TC1600000040.mm.1 | ENSMUST00000157634 | Gm24290 | predicted gene, 24290                           | 105141214 | 105141309 | TC1100001742.mm.1 | 0.0  | 0.797596 |
| TC1600000046.mm.1 | NM_001159331       | N6amt1  | N-6 adenine-specific DNA methyltransferase 1 (p | 87354185  | 87368742  | TC1600000952.mm.1 | 0.0  | 0.797925 |
| TC1600000047.mm.1 | NM_001146349       | Rnf217  | ring finger protein 217                         | 31501887  | 31609725  | TC1000001962.mm.1 | 0.0  | 0.798121 |
| TC1600000086.mm.1 | ENSMUST00000184285 | AC14479 | N/A                                             | 96040845  | 96040968  | TC0400002137.mm.1 | 0.0  | 0.798388 |
| TC1600000087.mm.1 | ENSMUST00000083813 | Gm25006 | predicted gene, 25006                           | 88192617  | 88192723  | TC0X00000849.mm.1 | 0.0  | 0.798399 |
| TC1600000096.mm.1 | XM_001476453       | Gm20891 | predicted gene, 20891                           | 27924318  | 27925001  | TC0Y00000082.mm.1 | 0.0  | 0.798635 |
| TC1600000113.mm.1 | XM_003689044       | Gm21642 | predicted gene, 21642                           | 28443743  | 28444426  | TC0Y00000084.mm.1 | 0.0  | 0.798635 |
| TC1600000116.mm.1 | XM_001472428       | Gm20799 | predicted gene, 20799                           | 35301254  | 35301937  | TC0Y00000111.mm.1 | 0.0  | 0.798635 |
| TC1600000120.mm.1 | ENSMUST00000185000 | CT03068 | N/A                                             | 97049481  | 97049585  | TC1400002575.mm.1 | 0.0  | 0.798841 |
| TC1600000122.mm.1 | NM_007420          | Adrb2   | adrenergic receptor, beta 2                     | 62177713  | 62179981  | TC1800001437.mm.1 | -0.1 | 0.798957 |
| TC1600000124.mm.1 | NM_172145          | Eva1b   | eva-1 homolog B (C. elegans)                    | 126147744 | 126149875 | TC0400001455.mm.1 | 0.0  | 0.799005 |
| TC1600000127.mm.1 | ENSMUST00000175253 | Gm23918 | predicted gene, 23918                           | 37179186  | 37179291  | TC1900000526.mm.1 | 0.0  | 0.799048 |
| TC1600000138.mm.1 | NM_146457          | Olfr282 | olfactory receptor 282                          | 98438397  | 98438997  | TC1900000974.mm.1 | 0.0  | 0.799646 |
| TC1600000142.mm.1 | ENSMUST00000184884 | Metazoa | Metazoan signal recognition particle RNA        | 139312424 | 139312700 | TC0500001670.mm.1 | 0.0  | 0.799802 |
| TC1600000157.mm.1 | OTTMUST00000044377 | RP23-41 | ---                                             | 60045111  | 60046229  | TC0X00002304.mm.1 | 0.1  | 0.799925 |
| TC1600000158.mm.1 | ENSMUST00000178707 | Gm9824  | predicted pseudogene 9824                       | 29030128  | 29030691  | TC1000000260.mm.1 | 0.0  | 0.799939 |
| TC1600000172.mm.1 | NM_001146023       | Fam98c  | family with sequence similarity 98, member C    | 29152510  | 29156234  | TC0700002714.mm.1 | 0.0  | 0.800108 |
| TC1600000175.mm.1 | NM_134241          | Vmn1r21 | vomeronalal 1 receptor 212                      | 22884042  | 22884205  | TC1300001609.mm.1 | 0.0  | 0.80021  |
| TC1600000180.mm.1 | ENSMUST00000114639 | Rbpsuh- | recombining binding protein suppressor of hairl | 46529351  | 46530922  | TC0600002194.mm.1 | 0.0  | 0.800457 |
| TC1600000184.mm.1 | ENSMUST00000183964 | RP23-35 | N/A                                             | 24430370  | 24430890  | TC0400002308.mm.1 | 0.0  | 0.80049  |
| TC1600000188.mm.1 | ENSMUST00000167639 | Gm6395  | predicted gene 6395                             | 64786192  | 64787683  | TC1200000520.mm.1 | 0.0  | 0.800584 |
| TC1600000189.mm.1 | NM_029839          | Trub1   | TruB pseudouridine (psi) synthase homolog 1 (E. | 57452906  | 57491005  | TC1900000814.mm.1 | 0.0  | 0.800605 |
| TC1600000190.mm.1 | NM_026685          | Tmem174 | transmembrane protein 174                       | 98634978  | 98637410  | TC1300002505.mm.1 | 0.1  | 0.800783 |
| TC1600000192.mm.1 | ENSMUST00000082394 | mt-Tq   | mitochondrially encoded tRNA glutamine          | 3772      | 3842      | TC0M00000020.mm.1 | 0.2  | 0.800883 |
| TC1600000193.mm.1 | ENSMUST00000083829 | Gm23847 | predicted gene, 23847                           | 130035094 | 130035203 | TC0700001902.mm.1 | -0.1 | 0.801267 |
| TC1600000195.mm.1 | ENSMUST00000082923 | n-R5s25 | nuclear encoded rRNA 5S 25                      | 34647400  | 34647518  | TC1800000292.mm.1 | 0.2  | 0.801273 |
| TC1600000214.mm.1 | NM_023493          | Cml5    | camello-like 5                                  | 85817218  | 85820972  | TC0600003600.mm.1 | 0.0  | 0.801297 |
| TC1600000215.mm.1 | ENSMUST00000118356 | Gm13085 | predicted gene 13085                            | 143663143 | 143663787 | TC0400003925.mm.1 | 0.0  | 0.801306 |
| TC1600000223.mm.1 | ENSMUST00000117039 | Gm23987 | predicted gene, 23987                           | 69685578  | 69685706  | TC1500001673.mm.1 | 0.0  | 0.80133  |
| TC1600000224.mm.1 | NM_020008          | Clec7a  | C-type lectin domain family 7, member a         | 129461591 | 129472777 | TC0600003236.mm.1 | -0.1 | 0.801343 |
| TC1600000232.mm.1 | ENSMUST00000104644 | Mir669d | microRNA 669d                                   | 10468343  | 10468463  | TC0200000096.mm.1 | 0.0  | 0.801377 |
| TC1600000238.mm.1 | ENSMUST00000157543 | Gm23540 | predicted gene, 23540                           | 121083986 | 121084149 | TC0400003452.mm.1 | -0.1 | 0.801546 |
| TC1600000249.mm.1 | NM_011502          | Stx3    | syntaxin 3                                      | 11775118  | 11819403  | TC1900001144.mm.1 | 0.0  | 0.801568 |
| TC1600000258.mm.1 | NM_019549          | Plek    | pleckstrin                                      | 16971206  | 17052381  | TC1100002249.mm.1 | 0.1  | 0.801612 |
| TC1600000263.mm.1 | ENSMUST00000175454 | Gm25472 | predicted gene, 25472                           | 85763794  | 85763871  | TC0100000768.mm.1 | 0.0  | 0.801704 |
| TC1600000277.mm.1 | NM_001039554       | Angptl7 | angiopoietin-like 7                             | 148495183 | 148500462 | TC0400004023.mm.1 | 0.0  | 0.80178  |
| TC1600000280.mm.1 | NM_031376          | Pik3ap1 | phosphoinositide-3-kinase adaptor protein 1     | 41274218  | 41385070  | TC1300001506.mm.1 | 0.1  | 0.801888 |
| TC1600000287.mm.1 | XM_981561          | Gm7664  | predicted gene 7664                             | 62528210  | 62528959  | TC1300002166.mm.1 | 0.0  | 0.802006 |
| TC1600000289.mm.1 | ENSMUST00000082782 | Gm23423 | predicted gene, 23423                           | 9210003   | 9210108   | TC0400000063.mm.1 | 0.0  | 0.802226 |
| TC1600000291.mm.1 | ENSMUST00000115650 | Gm8597  | predicted gene 8597                             | 13401493  | 13404191  | TC1700001470.mm.1 | 0.0  | 0.802424 |
| TC1600000293.mm.1 | NM_010704          | LepR    | leptin receptor                                 | 101717404 | 101815354 | TC0400001039.mm.1 | 0.0  | 0.802495 |
| TC1600000301.mm.1 | NM_001083808       | Rusc1   | RUN and SH3 domain containing 1                 | 89083977  | 89093363  | TC0300002333.mm.1 | 0.0  | 0.802556 |
| TC1600000306.mm.1 | NM_001253680       | Slc7a7  | solute carrier family 7 (cationic amino acid tr | 54369442  | 54417702  | TC1400002054.mm.1 | 0.0  | 0.802617 |
| TC1600000308.mm.1 | NM_146931          | Olfr796 | olfactory receptor 796                          | 129607547 | 129608479 | TC1000003183.mm.1 | 0.0  | 0.802716 |
| TC1600000309.mm.1 | ENSMUST00000158709 | Gm24349 | predicted gene, 24349                           | 53100050  | 53100150  | TC0100000384.mm.1 | 0.0  | 0.802872 |
| TC1600000310.mm.1 | ENSMUST00000117309 | Gm15236 | predicted gene 15236                            | 165680204 | 165680582 | TC0X00001676.mm.1 | 0.0  | 0.803116 |
| TC1600000318.mm.1 | NM_031188          | Mup1    | major urinary protein 1                         | 60498012  | 60501960  | TC0400002768.mm.1 | -0.2 | 0.803304 |
| TC1600000319.mm.1 | ENSMUST00000104547 | Gm24556 | predicted gene, 24556                           | 147200124 | 147200253 | TC0500003621.mm.1 | 0.0  | 0.80334  |
| TC1600000323.mm.1 | NM_025474          | Mrps14  | mitochondrial ribosomal protein S14             | 160195215 | 160202170 | TC0100001452.mm.1 | 0.0  | 0.803428 |
| TC1600000331.mm.1 | ENSMUST00000082886 | Gm25739 | predicted gene, 25739                           | 51254169  | 51254275  | TC1800001326.mm.1 | -0.1 | 0.803619 |

|                   |                    |         |                                                 |           |           |                    |      |          |
|-------------------|--------------------|---------|-------------------------------------------------|-----------|-----------|--------------------|------|----------|
| TC1600000333.mm.1 | ENSMUST00000158444 | Gm22840 | predicted gene, 22840                           | 93890615  | 93890750  | TC0600001110.mm.1  | 0.0  | 0.803709 |
| TC1600000342.mm.1 | NM_011849          | Nek4    | NIMA (never in mitosis gene a)-related expresse | 30951486  | 30987449  | TC1400000318.mm.1  | 0.0  | 0.803906 |
| TC1600000346.mm.1 | ENSMUST00000182375 | Gm8492  | predicted gene 8492                             | 9320395   | 9321381   | TC1700001420.mm.1  | 0.0  | 0.803951 |
| TC1600000362.mm.1 | NR_030463          | Mir690  | microRNA 690                                    | 28599935  | 28600043  | TC1600001434.mm.1  | 0.0  | 0.804019 |
| TC1600000397.mm.1 | ENSMUST00000083883 | Gm24698 | predicted gene, 24698                           | 13876097  | 13876226  | TC0800000135.mm.1  | -0.2 | 0.804155 |
| TC1600000399.mm.1 | NM_027617          | Spata1  | spermatogenesis associated 1                    | 146457203 | 146499753 | TC03000003100.mm.1 | 0.0  | 0.804189 |
| TC1600000402.mm.1 | NM_026242          | Mrfap1  | Morf4 family associated protein 1               | 36794867  | 36796772  | TC0500002265.mm.1  | 0.0  | 0.804306 |
| TC1600000422.mm.1 | ENSMUST00000183970 | CU20733 | N/A                                             | 3075107   | 3075213   | TC0200000001.mm.1  | 0.0  | 0.804804 |
| TC1600000425.mm.1 | ENSMUST00000104350 | Gm22545 | predicted gene, 22545                           | 129017890 | 129018021 | TC0800001602.mm.1  | 0.0  | 0.80482  |
| TC1600000426.mm.1 | XM_001476000       | Gm3213  | predicted gene 3213                             | 6363096   | 6368487   | TC1000000037.mm.1  | 0.0  | 0.804842 |
| TC1600000428.mm.1 | NM_023289          | Ceacam1 | carcinoembryonic antigen-related cell adhesion  | 17972124  | 17978556  | TC0700000261.mm.1  | 0.0  | 0.805081 |
| TC1600000429.mm.1 | ENSMUST00000104068 | Gm26081 | predicted gene, 26081                           | 46289833  | 46289964  | TC0300000341.mm.1  | 0.0  | 0.805098 |
| TC1600000440.mm.1 | NR_030464          | Mir691  | microRNA 691                                    | 74341990  | 74342067  | TC1600001896.mm.1  | 0.0  | 0.805279 |
| TC1600000441.mm.1 | ENSMUST00000082977 | Gm25023 | predicted gene, 25023                           | 57989473  | 57989579  | TC0X00000537.mm.1  | 0.0  | 0.805415 |
| TC1600000455.mm.1 | NM_001126319       | Mup9    | major urinary protein 9                         | 60218621  | 60421952  | TC0400004210.mm.1  | -0.2 | 0.805578 |
| TC1600000459.mm.1 | ENSMUST00000083197 | Gm22287 | predicted gene, 22287                           | 60257552  | 60257658  | TC0X00000550.mm.1  | 0.0  | 0.805801 |
| TC1600000463.mm.1 | ENSMUST00000157331 | Gm22561 | predicted gene, 22561                           | 58786608  | 58786691  | TC1900001725.mm.1  | 0.0  | 0.805881 |
| TC1600000464.mm.1 | NM_001256489       | 9030624 | RIKEN cDNA 9030624G23 gene                      | 24043202  | 24097269  | TC1200001527.mm.1  | 0.0  | 0.806041 |
| TC1600000489.mm.1 | NM_001033463       | Tatdn2  | TatD DNase domain containing 2                  | 113697050 | 113711069 | TC0600001259.mm.1  | 0.0  | 0.806319 |
| TC1600000491.mm.1 | ENSMUST00000083326 | Gm23453 | predicted gene, 23453                           | 33422733  | 33422838  | TC0100000213.mm.1  | 0.0  | 0.806583 |
| TC1600000494.mm.1 | NM_001276442       | Acy1    | aminoacylase 1                                  | 106432981 | 106438236 | TC0900003008.mm.1  | 0.0  | 0.806635 |
| TC1600000499.mm.1 | ENSMUST00000180005 | mmu-mir | mmu-mir-466c-1 // mmu-mir-466c-2                | 10481531  | 10481620  | TC0200000121.mm.1  | 0.0  | 0.806669 |
| TC1600000502.mm.1 | ENSMUST00000180211 | mmu-mir | mmu-mir-466c-1 // mmu-mir-466c-2                | 10483966  | 10484055  | TC0200000126.mm.1  | 0.0  | 0.806669 |
| TC1600000503.mm.1 | ENSMUST00000178951 | mmu-mir | mmu-mir-466c-1 // mmu-mir-466c-2                | 10491336  | 10491425  | TC0200000144.mm.1  | 0.0  | 0.806669 |
| TC1600000513.mm.1 | ENSMUST00000177832 | Gm25451 | predicted gene, 25451                           | 10480365  | 10480485  | TC0200000119.mm.1  | 0.0  | 0.80686  |
| TC1600000515.mm.1 | ENSMUST00000083780 | Gm25652 | predicted gene, 25652                           | 5035360   | 5035462   | TC1500000017.mm.1  | 0.0  | 0.80691  |
| TC1600000524.mm.1 | ENSMUST00000158463 | Gm24001 | predicted gene, 24001                           | 43036845  | 43036929  | TC0100000318.mm.1  | 0.0  | 0.806967 |
| TC1600000540.mm.1 | ENSMUST00000103870 | Gm24542 | predicted gene, 24542                           | 101554079 | 101554188 | TC1200001004.mm.1  | 0.0  | 0.806967 |
| TC1600000546.mm.1 | ENSMUST00000118284 | Gm13354 | predicted gene 13354                            | 18494369  | 18494537  | TC0200000298.mm.1  | 0.0  | 0.807297 |
| TC1600000564.mm.1 | XR_140771          | Gm19665 | predicted gene, 19665                           | 99099255  | 99102944  | TC0600002823.mm.1  | 0.0  | 0.80736  |
| TC1600000565.mm.1 | NM_001081055       | Trappc1 | trafficking protein particle complex 10         | 78186725  | 78244642  | TC1000002445.mm.1  | 0.0  | 0.807502 |
| TC1600000569.mm.1 | NM_027113          | Wdr5b   | WD repeat domain 5B                             | 36041190  | 36042974  | TC1600000502.mm.1  | 0.0  | 0.807805 |
| TC1600000582.mm.1 | NM_001099318       | Rhox2c  | reproductive homeobox 2C                        | 37453659  | 37458377  | TC0X00003391.mm.1  | 0.0  | 0.80789  |
| TC1600000603.mm.1 | ENSMUST00000116856 | Gm25042 | predicted gene, 25042                           | 133431703 | 133431823 | TC0300002981.mm.1  | 0.1  | 0.808319 |
| TC1600000620.mm.1 | NM_019652          | Asna1   | arsA arsenite transporter, ATP-binding, homolog | 85017929  | 85025278  | TC0800002599.mm.1  | 0.0  | 0.808641 |
| TC1600000624.mm.1 | ENSMUST00000104597 | Gm23910 | predicted gene, 23910                           | 73145774  | 73145905  | TC1200001914.mm.1  | 0.0  | 0.808675 |
| TC1600000629.mm.1 | ENSMUST00000170946 | Ighv2-1 | immunoglobulin heavy variable 2-1               | 113574242 | 113574681 | TC1200002469.mm.1  | 0.0  | 0.808762 |
| TC1600000645.mm.1 | ENSMUST00000083853 | Gm22681 | predicted gene, 22681                           | 144960734 | 144960839 | TC0100003211.mm.1  | 0.0  | 0.808809 |
| TC1600000649.mm.1 | ENSMUST00000177845 | Gm23521 | predicted gene, 23521                           | 12358898  | 12359007  | TC0700002337.mm.1  | 0.0  | 0.808852 |
| TC1600000659.mm.1 | NM_001177348       | Gm3646  | predicted gene 3646                             | 39804141  | 39805332  | TC0100002243.mm.1  | 0.0  | 0.809076 |
| TC1600000662.mm.1 | ENSMUST00000104332 | Gm25526 | predicted gene, 25526                           | 41216045  | 41216176  | TC1000000360.mm.1  | 0.0  | 0.809518 |
| TC1600000669.mm.1 | NM_021529          | Ppp2r3c | protein phosphatase 2, regulatory subunit B, ga | 55280715  | 55303000  | TC1200001763.mm.1  | 0.0  | 0.809523 |
| TC1600000673.mm.1 | ENSMUST00000158422 | Gm26171 | predicted gene, 26171                           | 12106737  | 12106867  | TC1200000097.mm.1  | 0.0  | 0.809678 |
| TC1600000674.mm.1 | NM_021487          | Kcne1l  | potassium voltage-gated channel, Isk-related fa | 142304752 | 142306294 | TC0X00003097.mm.1  | 0.0  | 0.809696 |
| TC1600000677.mm.1 | ENSMUST00000179334 | Gm24798 | predicted gene, 24798                           | 120045334 | 120045439 | TC1300001360.mm.1  | 0.0  | 0.809776 |
| TC1600000679.mm.1 | ENSMUST00000177961 | Gm22108 | predicted gene, 22108                           | 120017108 | 120017213 | TC1300002754.mm.1  | 0.0  | 0.809776 |
| TC1600000685.mm.1 | ENSMUST00000179547 | Gm21789 | predicted gene, 21789                           | 32941768  | 32942945  | TC0X00000284.mm.1  | 0.0  | 0.809826 |
| TC1600000691.mm.1 | ENSMUST00000157229 | Gm22790 | predicted gene, 22790                           | 105645843 | 105645971 | TC1200001068.mm.1  | 0.0  | 0.810094 |
| TC1600000695.mm.1 | NM_007605          | Capza3  | capping protein (actin filament) muscle Z-line, | 140041525 | 140042789 | TC0600001650.mm.1  | 0.0  | 0.810157 |
| TC1600000698.mm.1 | ENSMUST00000082653 | Gm25131 | predicted gene, 25131                           | 81039643  | 81039793  | TC1500000715.mm.1  | 0.1  | 0.810212 |
| TC1600000699.mm.1 | NR_030569          | Mir466g | microRNA 466g                                   | 10514595  | 10514674  | TC0200000198.mm.1  | 0.0  | 0.810451 |
| TC1600000703.mm.1 | NM_001167586       | Gm7257  | predicted gene 7257                             | 36431884  | 36434938  | TC0900000344.mm.1  | 0.0  | 0.8107   |
| TC1600000715.mm.1 | ENSMUST00000184289 | AL80779 | N/A                                             | 106426057 | 106426166 | TC0X00001074.mm.1  | 0.0  | 0.810756 |
| TC1600000726.mm.1 | ENSMUST00000178449 | Gm26335 | predicted gene, 26335                           | 32175099  | 32175205  | TC0500000336.mm.1  | -0.1 | 0.810806 |
| TC1600000734.mm.1 | NM_025781          | Tmem170 | transmembrane protein 170                       | 111864898 | 111876750 | TC0800002957.mm.1  | 0.0  | 0.810833 |
| TC1600000735.mm.1 | NM_025289          | Tbrg1   | transforming growth factor beta regulated gene  | 37649182  | 37657312  | TC0900002054.mm.1  | 0.0  | 0.810861 |
| TC1600000749.mm.1 | ENSMUST00000119510 | Gm15375 | predicted gene 15375                            | 88025211  | 88026059  | TC0100000835.mm.1  | 0.0  | 0.810928 |
| TC1600000763.mm.1 | ENSMUST00000158211 | Gm23546 | predicted gene, 23546                           | 33211805  | 33211941  | TC0200003322.mm.1  | 0.0  | 0.811336 |
| TC1600000779.mm.1 | NM_001033194       | Gtf3c3  | general transcription factor IIIC, polypeptide  | 54397581  | 54438971  | TC0100002348.mm.1  | 0.0  | 0.811408 |
| TC1600000781.mm.1 | ENSMUST00000167981 | Gm17353 | predicted gene, 17353                           | 66227319  | 66227573  | TC1300002226.mm.1  | 0.0  | 0.811469 |
| TC1600000782.mm.1 | ENSMUST00000082652 | Gm25132 | predicted gene, 25132                           | 55305317  | 55305423  | TC0300000423.mm.1  | -0.1 | 0.811983 |
| TC1600000784.mm.1 | NM_144819          | Ccdc92  | coiled-coil domain containing 92                | 124834418 | 124862424 | TC0500003264.mm.1  | 0.0  | 0.812253 |
| TC1600000785.mm.1 | ENSMUST00000183704 | AC16121 | N/A                                             | 74270247  | 74270436  | TC0800000840.mm.1  | 0.0  | 0.812261 |
| TC1600000786.mm.1 | NM_153598          | Ugt2b34 | UDP glucuronosyltransferase 2 family, polypepti | 86889767  | 86906937  | TC0500002688.mm.1  | 0.0  | 0.812308 |
| TC1600000790.mm.1 | ENSMUST00000083872 | n-R5s69 | nuclear encoded rRNA 5S 69                      | 57764427  | 57764545  | TC1100000667.mm.1  | 0.0  | 0.812409 |
| TC1600000792.mm.1 | ENSMUST00000104163 | Gm24350 | predicted gene, 24350                           | 42809035  | 42809167  | TC0200000737.mm.1  | 0.0  | 0.812936 |
| TC1600000801.mm.1 | ENSMUST00000177899 | Gm22852 | predicted gene, 22852                           | 103853419 | 103853519 | TC1500002326.mm.1  | 0.1  | 0.813012 |
| TC1600000810.mm.1 | ENSMUST00000163636 | Gm8356  | predicted gene 8356                             | 6528612   | 6537290   | TC1400001412.mm.1  | 0.0  | 0.813026 |
| TC1600000819.mm.1 | ENSMUST00000117763 | Gm11235 | predicted gene 11235                            | 72542666  | 72542998  | TC0400000765.mm.1  | 0.0  | 0.813072 |
| TC1600000852.mm.1 | ENSMUST00000160487 | Gm2389  | predicted pseudogene 2389                       | 85061154  | 85062642  | TC0100000735.mm.1  | 0.1  | 0.813262 |
| TC1600000861.mm.1 | NM_001276288       | Aes     | amino-terminal enhancer of split                | 81559444  | 81566371  | TC1000000903.mm.1  | -0.1 | 0.813267 |
| TC1600000878.mm.1 | NM_001195726       | Fam181a | family with sequence similarity 181, member A   | 103314959 | 103317065 | TC1200001025.mm.1  | 0.0  | 0.813334 |
| TC1600000891.mm.1 | NM_026850          | Pddc3   | phosducin-like 3                                | 38987804  | 38997236  | TC0100000280.mm.1  | 0.0  | 0.813399 |
| TC1600000902.mm.1 | ENSMUST00000118730 | Gm13326 | predicted gene 13326                            | 16978821  | 16979831  | TC0200003011.mm.1  | 0.0  | 0.813403 |
| TC1600000907.mm.1 | NM_001168259       | Tmem40  | transmembrane protein 40                        | 115729131 | 115762466 | TC0600002958.mm.1  | 0.0  | 0.813752 |
| TC1600000911.mm.1 | NM_175133          | Gucd1   | guanylyl cyclase domain containing 1            | 75351111  | 75517972  | TC1000002374.mm.1  | 0.0  | 0.813849 |
| TC1600000929.mm.1 | BC150481           | Adam4   | a disintegrin and metallopeptidase domain 4     | 81419443  | 81421946  | TC1200002020.mm.1  | 0.0  | 0.813899 |
| TC1600000930.mm.1 | ENSMUST00000083248 | Gm25138 | predicted gene, 25138                           | 82409091  | 82409226  | TC0800000910.mm.1  | -0.1 | 0.814093 |

|                   |                    |          |                                                 |           |            |                    |      |          |
|-------------------|--------------------|----------|-------------------------------------------------|-----------|------------|--------------------|------|----------|
| TC1600000931.mm.1 | ENSMUST00000157453 | Gm22813  | predicted gene, 22813                           | 106809336 | 106809458  | TC0200001600.mm.1  | 0.1  | 0.814116 |
| TC1600000937.mm.1 | NM_026240          | Gramd3   | GRAM domain containing 3                        | 56400337  | 56503792   | TC1800000564.mm.1  | 0.0  | 0.814251 |
| TC1600000938.mm.1 | NM_001199004       | Golga5   | golgi autoantigen, golgin subfamily a, 5        | 102469134 | 1024997907 | TC1200001017.mm.1  | 0.0  | 0.814299 |
| TC1600000943.mm.1 | ENSMUST00000084000 | Gm25630  | predicted gene, 25630                           | 35474885  | 35475046   | TC0900000338.mm.1  | 0.0  | 0.814448 |
| TC1600000952.mm.1 | ENSMUST00000178301 | Gm6803   | predicted gene 6803                             | 88018337  | 88018771   | TC1200002135.mm.1  | 0.0  | 0.814657 |
| TC1600000957.mm.1 | ENSMUST00000158445 | Gm24498  | predicted gene, 24498                           | 89927442  | 89927543   | TC1300002398.mm.1  | 0.0  | 0.814766 |
| TC1600000965.mm.1 | NM_203320          | Cxcl3    | chemokine (C-X-C motif) ligand 3                | 90786101  | 90788093   | TC0500000844.mm.1  | 0.0  | 0.814835 |
| TC1600000971.mm.1 | ENSMUST00000182705 | Gm8343   | predicted gene 8343                             | 37685941  | 37686934   | TC0900000371.mm.1  | 0.0  | 0.814941 |
| TC1600000972.mm.1 | NM_029639          | 1600029  | RIKEN cDNA 1600029D21 gene                      | 50494525  | 50505639   | TC0900000598.mm.1  | 0.0  | 0.815047 |
| TC1600000974.mm.1 | NM_001256501       | Gm10408  | predicted gene 10408                            | 3449312   | 3459287    | TC1400000007.mm.1  | 0.0  | 0.815102 |
| TC1600000982.mm.1 | NM_175347          | Srl      | sarcalumenin                                    | 4480216   | 4541816    | TC1600001130.mm.1  | 0.0  | 0.815173 |
| TC1600000986.mm.1 | NM_133968          | Snapc2   | small nuclear RNA activating complex, polypepti | 4253102   | 4256220    | TC0800000032.mm.1  | 0.0  | 0.815341 |
| TC1600000993.mm.1 | ENSMUST00000183445 | ST7-OT4  | ST7 overlapping transcript 4 conserved region 1 | 17694902  | 17695085   | TC0600000136.mm.1  | 0.0  | 0.815524 |
| TC1600000998.mm.1 | NM_138585          | Cherp    | calcium homeostasis endoplasmic reticulum pro   | 72460483  | 72475233   | TC0800002463.mm.1  | 0.0  | 0.815602 |
| TC1600000999.mm.1 | ENSMUST00000157267 | Gm25278  | predicted gene, 25278                           | 16852168  | 16852287   | TC0800000164.mm.1  | 0.0  | 0.815713 |
| TC1600001024.mm.1 | ENSMUST00000082864 | n-R5s19  | nuclear encoded rRNA 5S 193                     | 149817732 | 149817840  | TC0400001964.mm.1  | -0.1 | 0.815821 |
| TC1600001025.mm.1 | NM_054097          | Pip4k2c  | phosphatidylinositol 5-phosphate 4-kinase, type | 127197067 | 127211622  | TC1000003105.mm.1  | 0.0  | 0.815862 |
| TC1600001035.mm.1 | NM_027010          | Crygf    | crystallin, gamma F                             | 65926522  | 65928307   | TC0100000548.mm.1  | 0.0  | 0.816008 |
| TC1600001042.mm.1 | NM_001252569       | Serpina  | serine (or cysteine) peptidase inhibitor, clade | 103853295 | 103863619  | TC1200002533.mm.1  | 0.1  | 0.816043 |
| TC1600001043.mm.1 | ENSMUST00000145845 | Gm11612  | predicted gene 11612                            | 97566711  | 97576186   | TC1100001540.mm.1  | 0.0  | 0.816199 |
| TC1600001047.mm.1 | ENSMUST00000157271 | Gm25282  | predicted gene, 25282                           | 75668873  | 75668956   | TC0700001093.mm.1  | 0.0  | 0.816344 |
| TC1600001048.mm.1 | NM_001081057       | Tecpr2   | tectonin beta-propeller repeat containing 2     | 110889264 | 110972396  | TC1200001220.mm.1  | 0.0  | 0.816424 |
| TC1600001053.mm.1 | NM_153680          | Snx17    | sorting nexin 17                                | 31193227  | 31198900   | TC0500000316.mm.1  | 0.0  | 0.816648 |
| TC1600001054.mm.1 | ENSMUST00000104406 | Gm26018  | predicted gene, 26018                           | 70168832  | 70168959   | TC1300000861.mm.1  | 0.0  | 0.816698 |
| TC1600001060.mm.1 | NM_001014390       | Dyrk2    | dual-specificity tyrosine-(Y)-phosphorylation r | 118859349 | 118868903  | TC1000002998.mm.1  | 0.0  | 0.816717 |
| TC1600001064.mm.1 | XR_105542          | Gm5665   | predicted gene 5665                             | 62699406  | 62726689   | TC1300002172.mm.1  | 0.0  | 0.816731 |
| TC1600001068.mm.1 | ENSMUST00000120198 | Gm14928  | predicted gene 14928                            | 120178939 | 120179415  | TC0X00001177.mm.1  | 0.0  | 0.816783 |
| TC1600001091.mm.1 | ENSMUST00000083340 | Gm25125  | predicted gene, 25125                           | 85472734  | 85472869   | TC0900001110.mm.1  | 0.0  | 0.816983 |
| TC1600001102.mm.1 | ENSMUST00000178225 | Gm26488  | predicted gene, 26488                           | 59355152  | 59355230   | TC0700003135.mm.1  | 0.0  | 0.817045 |
| TC1600001111.mm.1 | ENSMUST00000177753 | Gm24220  | predicted gene, 24220                           | 59357021  | 59357099   | TC0700003136.mm.1  | 0.0  | 0.817045 |
| TC1600001112.mm.1 | ENSMUST00000183465 | Metazoa  | Metazoan signal recognition particle RNA        | 156860305 | 156860550  | TC0200002402.mm.1  | 0.0  | 0.8171   |
| TC1600001115.mm.1 | ENSMUST00000083902 | Gm23502  | predicted gene, 23502                           | 21812711  | 21812855   | TC1400000199.mm.1  | -0.1 | 0.817176 |
| TC1600001117.mm.1 | NM_053111          | Ear6     | eosinophil-associated, ribonuclease A family, m | 51853699  | 51854643   | TC1400000594.mm.1  | 0.0  | 0.817526 |
| TC1600001124.mm.1 | NM_145522          | Rabepk   | Rab9 effector protein with kelch motifs         | 34777556  | 34799912   | TC0200003350.mm.1  | 0.0  | 0.817582 |
| TC1600001125.mm.1 | NM_133656          | Crk      | v-crk sarcoma virus CT10 oncogene homolog (av   | 75679259  | 75708428   | TC1100001078.mm.1  | 0.0  | 0.817808 |
| TC1600001130.mm.1 | ENSMUST00000104056 | Gm23274  | predicted gene, 23274                           | 7265803   | 7265932    | TC010000031.mm.1   | 0.0  | 0.817864 |
| TC1600001131.mm.1 | ENSMUST00000184492 | RP23-38  | N/A                                             | 66074552  | 66091807   | TC1500000480.mm.1  | 0.0  | 0.817866 |
| TC1600001135.mm.1 | ENSMUST00000148069 | Gm14457  | predicted gene 14457                            | 8981822   | 8982982    | TC0X00000100.mm.1  | 0.0  | 0.818133 |
| TC1600001143.mm.1 | ENSMUST00000179003 | Gm23550  | predicted gene, 23550                           | 103267115 | 103267235  | TC0700003883.mm.1  | 0.1  | 0.818257 |
| TC1600001150.mm.1 | ENSMUST00000175284 | Gm25300  | predicted gene, 25300                           | 75970944  | 75971027   | TC0900002684.mm.1  | 0.0  | 0.818282 |
| TC1600001154.mm.1 | ENSMUST00000103986 | Gm25757  | predicted gene, 25757                           | 153831170 | 153831292  | TC0300001546.mm.1  | 0.0  | 0.818795 |
| TC1600001156.mm.1 | ENSMUST00000117013 | Gm25002  | predicted gene, 25002                           | 11948887  | 11948950   | TC0400000096.mm.1  | 0.0  | 0.818804 |
| TC1600001158.mm.1 | NM_001205158       | Yipf2    | Yip1 domain family, member 2                    | 21588682  | 21592831   | TC0900001879.mm.1  | 0.0  | 0.818809 |
| TC1600001159.mm.1 | ENSMUST00000116698 | Gm24591  | predicted gene, 24591                           | 44039250  | 44039361   | TC0800000506.mm.1  | 0.0  | 0.819052 |
| TC1600001168.mm.1 | ENSMUST00000098874 | Gm17312  | predicted gene, 17312                           | 73661225  | 73662721   | TC1400001039.mm.1  | 0.0  | 0.819215 |
| TC1600001172.mm.1 | ENSMUST00000178634 | Gm22776  | predicted gene, 22776                           | 59764088  | 59764181   | TC0700003304.mm.1  | 0.0  | 0.819362 |
| TC1600001173.mm.1 | ENSMUST00000083258 | Gm23460  | predicted gene, 23460                           | 52444436  | 52444544   | TC0100002318.mm.1  | 0.0  | 0.819399 |
| TC1600001177.mm.1 | ENSMUST00000185159 | 5S_rRNA  | 5S ribosomal RNA                                | 44668384  | 44668494   | TC1000000415.mm.1  | 0.0  | 0.819425 |
| TC1600001180.mm.1 | ENSMUST00000083070 | Gm26326  | predicted gene, 26326                           | 43743037  | 43743165   | TC1200000385.mm.1  | 0.0  | 0.819445 |
| TC1600001181.mm.1 | NM_009536          | Ywhae    | tyrosine 3-monooxygenase/tryptophan 5-monoc     | 75732869  | 75765845   | TC1100001082.mm.1  | 0.0  | 0.819459 |
| TC1600001191.mm.1 | NM_001033131       | Krtdap   | keratinocyte differentiation associated protein | 30787905  | 30791083   | TC0700000576.mm.1  | 0.0  | 0.819464 |
| TC1600001198.mm.1 | NM_021610          | Gpa33    | glycoprotein A33 (transmembrane)                | 166130238 | 166166510  | TC0100001532.mm.1  | 0.0  | 0.819515 |
| TC1600001200.mm.1 | NM_025291          | Sra1     | steroid receptor RNA activator 1                | 36667187  | 36670311   | TC1800001747.mm.1  | 0.0  | 0.819539 |
| TC1600001201.mm.1 | NM_054074          | Defb6    | defensin beta 6                                 | 19225478  | 19228209   | TC0800000182.mm.1  | 0.0  | 0.819633 |
| TC1600001203.mm.1 | NM_001098203       | Hic1     | hypermethylated in cancer 1                     | 75164565  | 75170255   | TC1100003217.mm.1  | 0.0  | 0.819693 |
| TC1600001210.mm.1 | NR_037304          | Mir3471  | microRNA 3471-1                                 | 10845500  | 10845630   | TC0400002196.mm.1  | 0.0  | 0.820457 |
| TC1600001211.mm.1 | NR_033303          | Slc22a1  | solute carrier family 22 (organic cation transp | 119220488 | 119231692  | TC0900003237.mm.1  | 0.0  | 0.820609 |
| TC1600001213.mm.1 | NM_001177583       | Gm20580  | predicted gene, 20580                           | 40598594  | 40602618   | TC1700000814.mm.1  | 0.0  | 0.820763 |
| TC1600001218.mm.1 | NM_153601          | Lgsn     | lengsin, lens protein with glutamine synthetase | 31176406  | 31204725   | TC0100000193.mm.1  | 0.0  | 0.820813 |
| TC1600001230.mm.1 | NM_001177584       | Gm17495  | predicted gene, 17495                           | 40520022  | 40530702   | TC1700000812.mm.1  | 0.0  | 0.820935 |
| TC1600001231.mm.1 | ENSMUST00000157298 | Gm23230  | predicted gene, 23230                           | 114844985 | 114845117  | TC0400003306.mm.1  | 0.0  | 0.820939 |
| TC1600001239.mm.1 | XM_001476114       | Gm3149   | predicted gene 3149                             | 4317283   | 4325721    | TC1400000023.mm.1  | 0.0  | 0.82103  |
| TC1600001243.mm.1 | NM_009895          | Cish     | cytokine inducible SH2-containing protein       | 107296026 | 107302784  | TC0900001365.mm.1  | 0.0  | 0.821074 |
| TC1600001247.mm.1 | NM_148934          | Tpgs1    | tubulin polyglutamylase complex subunit 1       | 79669369  | 79676126   | TC1000000809.mm.1  | 0.0  | 0.821082 |
| TC1600001250.mm.1 | NM_008284          | Hras1    | Harvey rat sarcoma virus oncogene 1             | 141189105 | 141194005  | TC0700004525.mm.1  | 0.0  | 0.821316 |
| TC1600001254.mm.1 | ENSMUST00000183473 | RP23-44  | N/A                                             | 22438520  | 22448865   | TC1900001259.mm.1  | 0.0  | 0.821322 |
| TC1600001256.mm.1 | NM_001159527       | Wdr35    | WD repeat domain 35                             | 8973892   | 9028847    | TC1200000074.mm.1  | 0.0  | 0.821481 |
| TC1600001260.mm.1 | NM_033134          | Inpp5e   | inositol polyphosphate-5-phosphatase E          | 26396249  | 26409203   | TC02000003190.mm.1 | 0.0  | 0.82157  |
| TC1600001274.mm.1 | NM_134184          | Vmn1r16  | vomerolnasal 1 receptor 16                      | 57322645  | 57323657   | TC06000002346.mm.1 | 0.0  | 0.822041 |
| TC1600001277.mm.1 | NM_009844          | Cd19     | CD19 antigen                                    | 126408448 | 126414870  | TC0700004277.mm.1  | -0.1 | 0.822222 |
| TC1600001280.mm.1 | ENSMUST00000175611 | Gm23291  | predicted gene, 23291                           | 99982775  | 99982852   | TC1200002216.mm.1  | -0.1 | 0.822425 |
| TC1600001284.mm.1 | ENSMUST00000173568 | Olfir755 | olfactory receptor 755, pseudogene 1            | 37276648  | 37278105   | TC1700000766.mm.1  | 0.0  | 0.822856 |
| TC1600001288.mm.1 | NM_028596          | Fbrsl1   | fibrosin-like 1                                 | 110361751 | 110448503  | TC0500002989.mm.1  | 0.0  | 0.822863 |
| TC1600001290.mm.1 | NM_013891          | Spdef    | SAM pointed domain containing ets transcrip     | 27714352  | 27728951   | TC1700001743.mm.1  | 0.0  | 0.823251 |
| TC1600001301.mm.1 | ENSMUST00000183049 | Gm5787   | predicted gene 5787                             | 36372599  | 36373642   | TC08000002062.mm.1 | 0.0  | 0.823241 |
| TC1600001308.mm.1 | ENSMUST00000158982 | Gm22500  | predicted gene, 22500                           | 38927209  | 38927307   | TC1600000565.mm.1  | 0.0  | 0.8235   |
| TC1600001309.mm.1 | NM_008191          | Guca2b   | guanylate cyclase activator 2b (retina)         | 119656601 | 119658954  | TC04000003433.mm.1 | 0.0  | 0.823556 |
| TC1600001315.mm.1 | NM_008756          | Ocln     | occludin                                        | 100496507 | 100552718  | TC1300002536.mm.1  | 0.0  | 0.823682 |

|                   |                    |         |                                                        |           |           |                    |      |          |
|-------------------|--------------------|---------|--------------------------------------------------------|-----------|-----------|--------------------|------|----------|
| TC1600001319.mm.1 | NM_001037713       | Xaf1    | XIAP associated factor 1                               | 72301629  | 72313733  | TC1100000989.mm.1  | 0.0  | 0.823706 |
| TC1600001320.mm.1 | ENSMUST00000173652 | Gm20450 | predicted gene 20450                                   | 36597898  | 36598044  | TC1700000737.mm.1  | 0.0  | 0.823716 |
| TC1600001322.mm.1 | NM_054056          | Pawr    | PRKC, apoptosis, WT1, regulator                        | 108332189 | 108414391 | TC1000001270.mm.1  | 0.0  | 0.823767 |
| TC1600001324.mm.1 | NM_133895          | Slc15a4 | solute carrier family 15, member 4                     | 127595664 | 127632897 | TC0500003284.mm.1  | 0.0  | 0.823799 |
| TC1600001328.mm.1 | ENSMUST00000179918 | Gm23576 | predicted gene, 23576                                  | 60174317  | 60174426  | TC1800000605.mm.1  | 0.0  | 0.823923 |
| TC1600001337.mm.1 | NM_173037          | Tango6  | transport and golgi organization 6                     | 106683068 | 106851439 | TC0800001256.mm.1  | 0.0  | 0.824138 |
| TC1600001338.mm.1 | ENSMUST00000103807 | Gm26140 | predicted gene, 26140                                  | 23199780  | 23199889  | TC1200000190.mm.1  | 0.0  | 0.824423 |
| TC1600001355.mm.1 | ENSMUST00000089584 | Spr-ps1 | sepiapterin reductase pseudogene 1                     | 85155005  | 85156234  | TC0600000957.mm.1  | 0.0  | 0.824502 |
| TC1600001368.mm.1 | ENSMUST00000103727 | Traj14  | T cell receptor alpha joining 14                       | 54205111  | 54205143  | TC1400000736.mm.1  | 0.1  | 0.824564 |
| TC1600001373.mm.1 | ENSMUST00000181493 | Gm3200  | predicted pseudogene 3200                              | 100760805 | 100761806 | TC0700003825.mm.1  | 0.0  | 0.82463  |
| TC1600001383.mm.1 | ENSMUST00000122632 | Gm25179 | predicted gene, 25179                                  | 35234796  | 35234923  | TC1600001542.mm.1  | 0.0  | 0.824689 |
| TC1600001387.mm.1 | uc029qyg.1         | Pol     | RecName: Full=Hepatitis B virus-related Pol polyprotei | 65939794  | 65944772  | TC1000000618.mm.1  | 0.1  | 0.824712 |
| TC1600001388.mm.1 | XM_001475808       | Gm3141  | predicted gene 3141                                    | 43120933  | 43150222  | TC1400001849.mm.1  | 0.0  | 0.824762 |
| TC1600001390.mm.1 | ENSMUST00000084055 | Gm7676  | predicted gene 7676                                    | 13895816  | 13896613  | TC0800000137.mm.1  | 0.0  | 0.824893 |
| TC1600001396.mm.1 | NM_001177521       | Gm15308 | predicted gene 15308                                   | 21529030  | 21530012  | TC0800000243.mm.1  | 0.0  | 0.824906 |
| TC1600001398.mm.1 | NM_010915          | Klk1b4  | kallikrein 1-related peptidase b4                      | 44207435  | 44211754  | TC0700000794.mm.1  | 0.1  | 0.825242 |
| TC1600001411.mm.1 | NM_001195074       | Kcnmb3  | potassium large conductance calcium-activated c        | 32472321  | 32491969  | TC0300001800.mm.1  | 0.0  | 0.825308 |
| TC1600001419.mm.1 | NM_031190          | Pgk2    | phosphoglycerate kinase 2                              | 40207018  | 40208609  | TC1700002101.mm.1  | 0.0  | 0.82532  |
| TC1600001434.mm.1 | NM_001033573       | Zdhhc6  | zinc finger, DHHC domain containing 6                  | 55271291  | 55316032  | TC1900001694.mm.1  | 0.0  | 0.825459 |
| TC1600001460.mm.1 | ENSMUST00000157451 | Gm22815 | predicted gene, 22815                                  | 9301391   | 9301452   | TC0900000075.mm.1  | 0.0  | 0.825519 |
| TC1600001462.mm.1 | ENSMUST00000175033 | Gm26197 | predicted gene, 26197                                  | 78311226  | 78311340  | TC1400002470.mm.1  | 0.0  | 0.825552 |
| TC1600001486.mm.1 | ENSMUST00000175432 | Gm23872 | predicted gene, 23872                                  | 108721848 | 108721924 | TC1200002355.mm.1  | -0.1 | 0.825944 |
| TC1600001489.mm.1 | NM_025858          | Shisa5  | shisa homolog 5 (Xenopus laevis)                       | 109038565 | 109057792 | TC0900001431.mm.1  | 0.0  | 0.826113 |
| TC1600001492.mm.1 | NM_017473          | Rdh7    | retinol dehydrogenase 7                                | 127884027 | 127889247 | TC1000003123.mm.1  | 0.0  | 0.826323 |
| TC1600001494.mm.1 | XM_003689124       | Gm21173 | predicted gene, 21173                                  | 76761585  | 76787724  | TC0Y00000200.mm.1  | 0.0  | 0.826332 |
| TC1600001504.mm.1 | XM_001473243       | Gm20817 | predicted gene, 20817                                  | 68806601  | 68832743  | TC0Y00000439.mm.1  | 0.0  | 0.826332 |
| TC1600001505.mm.1 | NM_172770          | Ttc12   | tetratricopeptide repeat domain 12                     | 49436961  | 49486225  | TC0900000252.mm.1  | 0.0  | 0.826532 |
| TC1600001509.mm.1 | ENSMUST00000179496 | mmu-mir | mmu-mir-1194                                           | 166620362 | 166620482 | TC0100001538.mm.1  | 0.1  | 0.826588 |
| TC1600001527.mm.1 | ENSMUST00000180257 | mmu-mir | mmu-mir-1194                                           | 189393350 | 189393470 | TC0100001819.mm.1  | 0.1  | 0.826588 |
| TC1600001542.mm.1 | ENSMUST00000179154 | mmu-mir | mmu-mir-1194                                           | 107697834 | 107697954 | TC0400003225.mm.1  | 0.1  | 0.826588 |
| TC1600001547.mm.1 | ENSMUST00000116733 | mmu-mir | mmu-mir-1194                                           | 56070664  | 56070784  | TC0X00000510.mm.1  | 0.1  | 0.826588 |
| TC1600001548.mm.1 | ENSMUST00000179867 | mmu-mir | mmu-mir-1194                                           | 42280342  | 42280462  | TC1400001826.mm.1  | 0.1  | 0.826588 |
| TC1600001549.mm.1 | ENSMUST00000116812 | mmu-mir | mmu-mir-1194                                           | 42624917  | 42625037  | TC1400001836.mm.1  | 0.1  | 0.826588 |
| TC1600001553.mm.1 | ENSMUST00000179366 | mmu-mir | mmu-mir-1194                                           | 45404840  | 45404960  | TC1400001901.mm.1  | 0.1  | 0.826588 |
| TC1600001554.mm.1 | NM_009358          | Ppp2r5d | protein phosphatase 2, regulatory subunit B (B5        | 46682991  | 46705002  | TC1700002186.mm.1  | 0.0  | 0.8266   |
| TC1600001557.mm.1 | ENSMUST00000104494 | Gm22493 | predicted gene, 22493                                  | 56600818  | 56600949  | TC0600002336.mm.1  | 0.1  | 0.826701 |
| TC1600001563.mm.1 | ENSMUST00000079189 | 4922502 | RIKEN cDNA 4922502B01 gene                             | 109250481 | 109251728 | TC0800002898.mm.1  | 0.0  | 0.82673  |
| TC1600001566.mm.1 | NM_178379          | Cox10   | cytochrome c oxidase assembly protein 10               | 63962627  | 64079472  | TC1100002967.mm.1  | 0.0  | 0.827304 |
| TC1600001568.mm.1 | NM_146215          | Ftsjd1  | FtsJ methyltransferase domain containing 1             | 110217960 | 110224489 | TC0800001316.mm.1  | 0.0  | 0.827327 |
| TC1600001570.mm.1 | ENSMUST00000183818 | RP24-88 | N/A                                                    | 32508413  | 32516958  | TC0900000291.mm.1  | 0.0  | 0.82743  |
| TC1600001574.mm.1 | NM_147002          | Olfr175 | olfactory receptor 175, pseudogene 1                   | 58823781  | 58826761  | TC1000001781.mm.1  | 0.0  | 0.828007 |
| TC1600001592.mm.1 | NM_019659          | Kcnj1   | potassium inwardly-rectifying channel, subfamil        | 32372418  | 32399197  | TC0900000289.mm.1  | 0.0  | 0.828274 |
| TC1600001604.mm.1 | ENSMUST00000174920 | Gm22402 | predicted gene, 22402                                  | 82061112  | 82061221  | TC0400002928.mm.1  | 0.0  | 0.828299 |
| TC1600001614.mm.1 | ENSMUST00000177759 | Gm25988 | predicted gene, 25988                                  | 59428665  | 59428743  | TC07000003172.mm.1 | 0.0  | 0.828308 |
| TC1600001615.mm.1 | ENSMUST00000180051 | Gm25221 | predicted gene, 25221                                  | 59430536  | 59430614  | TC0700003173.mm.1  | 0.0  | 0.828308 |
| TC1600001616.mm.1 | ENSMUST00000177886 | Gm23471 | predicted gene, 23471                                  | 59434277  | 59434355  | TC0700003175.mm.1  | 0.0  | 0.828308 |
| TC1600001620.mm.1 | ENSMUST00000179208 | Gm23449 | predicted gene, 23449                                  | 59512795  | 59512873  | TC0700003213.mm.1  | 0.0  | 0.828308 |
| TC1600001634.mm.1 | ENSMUST00000157357 | Gm22224 | predicted gene, 22224                                  | 8873079   | 8873171   | TC1600001180.mm.1  | 0.0  | 0.828362 |
| TC1600001636.mm.1 | ENSMUST00000125096 | Gm12221 | predicted gene 12221                                   | 54158926  | 54160056  | TC1100000618.mm.1  | 0.0  | 0.828425 |
| TC1600001638.mm.1 | ENSMUST00000104381 | Gm24608 | predicted gene, 24608                                  | 90010595  | 90010730  | TC0300002362.mm.1  | 0.0  | 0.828738 |
| TC1600001641.mm.1 | NM_011841          | Mapk7   | mitogen-activated protein kinase 7                     | 61488812  | 61494406  | TC1100002914.mm.1  | 0.0  | 0.82885  |
| TC1600001643.mm.1 | ENSMUST00000083149 | n-R5s20 | nuclear encoded rRNA 5S 20S                            | 120640711 | 120640835 | TC0200004466.mm.1  | -0.1 | 0.829168 |
| TC1600001648.mm.1 | ENSMUST00000083107 | Gm24044 | predicted gene, 24044                                  | 120128780 | 120128935 | TC0900001596.mm.1  | -0.1 | 0.829207 |
| TC1600001663.mm.1 | NM_001128510       | Gm9513  | predicted gene 9513                                    | 36475638  | 36477212  | TC0900000345.mm.1  | 0.0  | 0.829598 |
| TC1600001673.mm.1 | NM_019440          | Irgm2   | immunity-related GTPase family M member 2              | 58214977  | 58222783  | TC1100004266.mm.1  | 0.0  | 0.829599 |
| TC1600001675.mm.1 | NM_013595          | Mbd3    | methyl-CpG binding domain protein 3                    | 80392539  | 80399550  | TC1000002499.mm.1  | 0.0  | 0.829603 |
| TC1600001677.mm.1 | ENSMUST00000120145 | Mup-ps1 | major urinary protein, pseudogene 18                   | 61874700  | 61883296  | TC0400002775.mm.1  | -0.1 | 0.829686 |
| TC1600001693.mm.1 | ENSMUST00000083009 | Gm23240 | predicted gene, 23240                                  | 48462173  | 48462293  | TC0100002298.mm.1  | 0.0  | 0.829692 |
| TC1600001697.mm.1 | NM_026232          | Slc25a3 | solute carrier family 25, member 30                    | 75761999  | 75787037  | TC1400002430.mm.1  | 0.0  | 0.829748 |
| TC1600001712.mm.1 | NM_001171003       | Mgam    | maltase-glucoamylase                                   | 40628831  | 40769123  | TC0600000416.mm.1  | 0.0  | 0.829839 |
| TC1600001715.mm.1 | XR_105345          | Gm10826 | predicted gene 10826                                   | 21030490  | 21033793  | TC1000001838.mm.1  | 0.0  | 0.829926 |
| TC1600001716.mm.1 | BC053003           | Rap2a   | RAS related protein 2a                                 | 120478461 | 120507194 | TC1400001306.mm.1  | 0.0  | 0.829959 |
| TC1600001719.mm.1 | BC119035           | Upf3a   | UPF3 regulator of nonsense transcripts homolog         | 13785615  | 13798538  | TC0800000132.mm.1  | 0.0  | 0.830339 |
| TC1600001732.mm.1 | NM_134235          | Vmn1r21 | vomerolnasal 1 receptor 210                            | 22827194  | 22828114  | TC1300001604.mm.1  | 0.0  | 0.830498 |
| TC1600001733.mm.1 | ENSMUST00000158622 | Gm24051 | predicted gene, 24051                                  | 8004942   | 8005016   | TC1100002202.mm.1  | 0.0  | 0.830521 |
| TC1600001738.mm.1 | NM_010643          | Klk1b24 | kallikrein 1-related peptidase b24                     | 44188236  | 44192452  | TC0700000792.mm.1  | 0.0  | 0.83062  |
| TC1600001747.mm.1 | ENSMUST00000104598 | Gm23909 | predicted gene, 23909                                  | 37437490  | 37437620  | TC1400001748.mm.1  | 0.0  | 0.830671 |
| TC1600001748.mm.1 | XM_003689053       | Gm21201 | predicted gene, 21201                                  | 34561734  | 34562417  | TC0Y00000108.mm.1  | 0.0  | 0.830695 |
| TC1600001757.mm.1 | NM_144955          | Nkx6-1  | NK6 homeobox 1                                         | 101658139 | 101665226 | TC0500002856.mm.1  | 0.0  | 0.830731 |
| TC1600001777.mm.1 | NM_207550          | Olfr199 | olfactory receptor 199                                 | 59215685  | 59216615  | TC1600001796.mm.1  | 0.0  | 0.830767 |
| TC1600001778.mm.1 | NM_147013          | Olfr103 | olfactory receptor 1038, pseudogene                    | 86120224  | 86123037  | TC0200001268.mm.1  | 0.0  | 0.83086  |
| TC1600001779.mm.1 | NM_011498          | Bhlhe40 | basic helix-loop-helix family, member e40              | 108660629 | 108666925 | TC0600001203.mm.1  | 0.0  | 0.830908 |
| TC1600001781.mm.1 | ENSMUST00000175195 | Gm22914 | predicted gene, 22914                                  | 51621632  | 51621708  | TC0600000612.mm.1  | -0.1 | 0.830935 |
| TC1600001784.mm.1 | NM_177461          | Micall1 | microtubule associated monooxygenase, calponi          | 79108972  | 79136901  | TC1500000666.mm.1  | 0.0  | 0.831135 |
| TC1600001791.mm.1 | ENSMUST00000157526 | Gm26347 | predicted gene, 26347                                  | 128435914 | 128436044 | TC1000001606.mm.1  | 0.0  | 0.831171 |
| TC1600001795.mm.1 | NM_007546          | Bik     | BCL2-interacting killer                                | 83526862  | 83544635  | TC1500000775.mm.1  | 0.0  | 0.83127  |
| TC1600001796.mm.1 | NM_019491          | Rala    | v-ral simian leukemia viral oncogene homolog A         | 17880575  | 17944239  | TC1300001508.mm.1  | 0.0  | 0.831409 |
| TC1600001800.mm.1 | ENSMUST00000178914 | Gm25157 | predicted gene, 25157                                  | 59779250  | 59779343  | TC0700003310.mm.1  | 0.0  | 0.831439 |

|                   |                    |         |                                                  |           |           |                   |      |          |
|-------------------|--------------------|---------|--------------------------------------------------|-----------|-----------|-------------------|------|----------|
| TC1600001805.mm.1 | ENSMUST00000179630 | Gm22941 | predicted gene, 22941                            | 59786818  | 59786911  | TC0700003313.mm.1 | 0.0  | 0.831439 |
| TC1600001806.mm.1 | ENSMUST00000177645 | Gm22258 | predicted gene, 22258                            | 59799444  | 59799537  | TC0700003318.mm.1 | 0.0  | 0.831439 |
| TC1600001817.mm.1 | ENSMUST00000180356 | Gm22391 | predicted gene, 22391                            | 59606390  | 59606468  | TC0700003263.mm.1 | 0.0  | 0.831638 |
| TC1600001820.mm.1 | ENSMUST00000180055 | Gm24137 | predicted gene, 24137                            | 59610133  | 59610211  | TC0700003265.mm.1 | 0.0  | 0.831638 |
| TC1600001831.mm.1 | NM_001011519       | Olfr114 | olfactory receptor 1148                          | 87833041  | 87833985  | TC0200001306.mm.1 | 0.0  | 0.832014 |
| TC1600001839.mm.1 | ENSMUST00000046721 | LOC1010 | uncharacterized LOC101055652                     | 99979061  | 99979663  | TC0500000969.mm.1 | 0.0  | 0.832116 |
| TC1600001843.mm.1 | NM_001081241       | Fam65a  | family with sequence similarity 65, member A     | 105605229 | 105622219 | TC0800001221.mm.1 | 0.0  | 0.832164 |
| TC1600001846.mm.1 | NM_001081285       | Mup6    | major urinary protein 6                          | 59964294  | 60007274  | TC0400000663.mm.1 | 0.0  | 0.832246 |
| TC1600001847.mm.1 | NM_010899          | Nfatc2  | nuclear factor of activated T cells, cytoplasmic | 168476410 | 168601657 | TC0200005218.mm.1 | 0.0  | 0.832684 |
| TC1600001879.mm.1 | ENSMUST00000121012 | Gm7820  | predicted gene 7820                              | 132888108 | 132889159 | TC0X00002977.mm.1 | 0.0  | 0.832787 |
| TC1600001880.mm.1 | NM_001167877       | Cyp2c50 | cytochrome P450, family 2, subfamily c, polypep  | 40089679  | 40113955  | TC1900000568.mm.1 | 0.0  | 0.832852 |
| TC1600001883.mm.1 | ENSMUST00000122695 | Gm24379 | predicted gene, 24379                            | 158487602 | 158487687 | TC0200002434.mm.1 | 0.0  | 0.833221 |
| TC1600001896.mm.1 | ENSMUST00000175600 | Gm26116 | predicted gene, 26116                            | 54658497  | 54658573  | TC1100002765.mm.1 | 0.0  | 0.8336   |
| TC1600001918.mm.1 | NM_001005341       | Ypel2   | yippee-like 2 (Drosophila)                       | 86936425  | 86993762  | TC1100003462.mm.1 | 0.0  | 0.833627 |
| TC1600001920.mm.1 | ENSMUST00000083793 | Gm26164 | predicted gene, 26164                            | 60079590  | 60079693  | TC0800000643.mm.1 | 0.0  | 0.833761 |
| TC1600001925.mm.1 | ENSMUST00000184331 | 7SK     | 7SK RNA                                          | 152201807 | 152202142 | TC0400004092.mm.1 | 0.0  | 0.833812 |
| TC1600001934.mm.1 | ENSMUST00000083184 | Gm23297 | predicted gene, 23297                            | 143531394 | 143531520 | TC0700004588.mm.1 | 0.1  | 0.833842 |
| TC1600001939.mm.1 | NM_025494          | Atp6v1c | ATPase, H+ transporting, lysosomal V1 subunit C  | 38661904  | 38692444  | TC1500000296.mm.1 | 0.0  | 0.833843 |
| TC1600001940.mm.1 | NM_010984          | Olfr263 | olfactory receptor 263                           | 21132698  | 21133784  | TC1300000160.mm.1 | 0.0  | 0.833847 |
| TC1600001957.mm.1 | ENSMUST00000083267 | Gm24612 | predicted gene, 24612                            | 82596073  | 82596179  | TC1100003365.mm.1 | 0.0  | 0.834706 |
| TC1600001961.mm.1 | NR_028532          | Snord71 | small nucleolar RNA, C/D box 71                  | 109839295 | 109839379 | TC0800001302.mm.1 | 0.1  | 0.834835 |
| TC1600001974.mm.1 | ENSMUST00000119880 | Gm15807 | predicted gene 15807                             | 14037736  | 14038861  | TC1600001243.mm.1 | 0.0  | 0.835443 |
| TC1600001976.mm.1 | NM_175645          | Xylt1   | xylosyltransferase 1                             | 117033971 | 117667751 | TC0700001689.mm.1 | 0.0  | 0.835552 |
| TC1600001984.mm.1 | XR_141351          | AA66720 | expressed sequence AA667203                      | 64894744  | 64901208  | TC1800000666.mm.1 | 0.0  | 0.835571 |
| TC1600001987.mm.1 | ENSMUST00000082938 | Gm23376 | predicted gene, 23376                            | 86930743  | 86930902  | TC0300000688.mm.1 | 0.0  | 0.835596 |
| TC1600001988.mm.1 | NM_009827          | Cckar   | cholecystokinin A receptor                       | 53698485  | 53707704  | TC0500002428.mm.1 | 0.0  | 0.835604 |
| TC1600001990.mm.1 | NM_010503          | Ifna2   | interferon alpha 2                               | 88682881  | 88683912  | TC0400003012.mm.1 | 0.0  | 0.835645 |
| TC1600002005.mm.1 | NM_009367          | Tgfb2   | transforming growth factor, beta 2               | 186623186 | 186705992 | TC0100003754.mm.1 | 0.0  | 0.835815 |
| TC1600002011.mm.1 | ENSMUST00000174624 | Gm18191 | predicted gene, 18191                            | 8773326   | 8777247   | TC0700002270.mm.1 | 0.0  | 0.835896 |
| TC1600002016.mm.1 | NM_028792          | Josd1   | Josephin domain containing 1                     | 79674247  | 79687872  | TC1500001883.mm.1 | 0.0  | 0.835907 |
| TC1600002019.mm.1 | ENSMUST00000175502 | Gm24575 | predicted gene, 24575                            | 83516936  | 83517012  | TC1500000773.mm.1 | 0.0  | 0.835983 |
| TC1600002045.mm.1 | ENSMUST00000157923 | Gm24960 | predicted gene, 24960                            | 98383402  | 98383491  | TC0400003118.mm.1 | 0.0  | 0.836057 |
| TC1600002055.mm.1 | NM_145921          | Olah    | oleoyl-ACP hydrolase                             | 3341982   | 3366600   | TC0200002846.mm.1 | 0.0  | 0.836139 |
| TC1600002056.mm.1 | ENSMUST00000185172 | 5S_rRNA | 5S ribosomal RNA                                 | 23519746  | 23519856  | TC0600000196.mm.1 | -0.1 | 0.836398 |
| TC1600002059.mm.1 | ENSMUST00000101891 | Gm22173 | predicted gene, 22173                            | 59897161  | 59897254  | TC0700003338.mm.1 | 0.0  | 0.836605 |
| TC1600002063.mm.1 | NM_020593          | Fbxo3   | F-box protein 3                                  | 104027721 | 104063240 | TC0700001547.mm.1 | 0.0  | 0.836816 |
| TC1600002073.mm.1 | ENSMUST00000104035 | Gm22271 | predicted gene, 22271                            | 56277518  | 56277645  | TC1900001702.mm.1 | 0.1  | 0.836916 |
| TC1600002077.mm.1 | NM_018742          | Bet1l   | blocked early in transport 1 homolog (S. cerevi  | 140853384 | 140856383 | TC0700004508.mm.1 | 0.0  | 0.836987 |
| TC1600002080.mm.1 | NR_037216          | Mir344d | microRNA 344d-2                                  | 61685272  | 61685351  | TC0700003369.mm.1 | 0.0  | 0.837295 |
| TC1600002086.mm.1 | NM_178932          | Aoc2    | amine oxidase, copper containing 2 (retina-spec  | 101325063 | 101329702 | TC1100001650.mm.1 | 0.0  | 0.83744  |
| TC1600002087.mm.1 | NM_025553          | Mitp11  | mitochondrial ribosomal protein L11              | 49662306  | 4966995   | TC0X00000500.mm.1 | 0.0  | 0.83768  |
| TC1600002094.mm.1 | NCBI_Gene:10077517 | Ighv8-1 | immunoglobulin heavy variable 8-13               | 115765333 | 115765635 | TC1200002651.mm.1 | -0.1 | 0.83769  |
| TC1600002116.mm.1 | NM_001033350       | Bank1   | B cell scaffold protein with ankyrin repeats 1   | 136053363 | 136326046 | TC0300002998.mm.1 | -0.1 | 0.837717 |
| TC1600002118.mm.1 | NM_027495          | Tmem144 | transmembrane protein 144                        | 79813146  | 79842662  | TC0300002203.mm.1 | 0.0  | 0.837865 |
| TC1600002128.mm.1 | NM_029378          | Dmrtc1a | DMRT-like family C1a                             | 102903216 | 102908687 | TC0X00002762.mm.1 | 0.0  | 0.837895 |
| TC1600002137.mm.1 | ENSMUST00000118181 | Gm14794 | predicted gene 14794                             | 88749452  | 88749643  | TC0X00000854.mm.1 | 0.0  | 0.83796  |
| TC1600002152.mm.1 | ENSMUST00000182798 | Gm2445  | predicted gene 2445                              | 98402095  | 98403083  | TC1300002501.mm.1 | 0.0  | 0.837973 |
| TC1600002158.mm.1 | ENSMUST00000103965 | Gm24580 | predicted gene, 24580                            | 63878196  | 63878326  | TC0800000669.mm.1 | 0.0  | 0.838048 |
| TC1600002167.mm.1 | ENSMUST00000184570 | U6      | U6 spliceosomal RNA                              | 133330924 | 133330982 | TC0200002049.mm.1 | 0.0  | 0.838055 |
| TC1600002169.mm.1 | NR_039583          | Mir3473 | microRNA 3473d                                   | 111016450 | 111016530 | TC0800002936.mm.1 | 0.0  | 0.838105 |
| TC1600002171.mm.1 | XM_001477474       | Gm3594  | predicted gene 3594                              | 6435796   | 6444611   | TC0400001411.mm.1 | 0.0  | 0.83834  |
| TC1600002172.mm.1 | NM_134040          | Ddx1    | DEAD (Asp-Glu-Ala-Asp) box polypeptide 1         | 13219307  | 13249213  | TC1200001436.mm.1 | 0.0  | 0.838397 |
| TC1600002173.mm.1 | ENSMUST00000118303 | Gm14658 | predicted gene 14658                             | 63166983  | 63167238  | TC0X00000580.mm.1 | 0.0  | 0.838472 |
| TC1600002175.mm.1 | ENSMUST00000121901 | Gm13904 | predicted gene 13904                             | 107010938 | 107011774 | TC0200001607.mm.1 | 0.0  | 0.838544 |
| TC1600002180.mm.1 | ENSMUST00000104364 | Gm23709 | predicted gene, 23709                            | 43136499  | 43136628  | TC0400002518.mm.1 | 0.0  | 0.838626 |
| TC1600002182.mm.1 | NM_025381          | Atp6v1f | ATPase, H+ transporting, lysosomal V1 subunit F  | 29467718  | 29470512  | TC0600000233.mm.1 | 0.0  | 0.838776 |
| TC1700000002.mm.1 | NM_025956          | 1700011 | RIKEN cDNA 1700011H14 gene                       | 49226358  | 49245428  | TC1400001960.mm.1 | 0.0  | 0.839044 |
| TC1700000020.mm.1 | ENSMUST00000104132 | Gm22284 | predicted gene, 22284                            | 45639383  | 45639514  | TC1100000454.mm.1 | 0.0  | 0.839183 |
| TC1700000035.mm.1 | ENSMUST00000184566 | RP23-16 | N/A                                              | 15528046  | 15528427  | TC0700002409.mm.1 | 0.0  | 0.839462 |
| TC1700000051.mm.1 | NM_138602          | Praf2   | PRA1 domain family 2                             | 7728439   | 7731064   | TC0X00000065.mm.1 | 0.0  | 0.839708 |
| TC1700000053.mm.1 | NM_010564          | Inha    | inhibin alpha                                    | 75507077  | 75510366  | TC0100000662.mm.1 | 0.0  | 0.839822 |
| TC1700000055.mm.1 | NM_011976          | Sema4g  | sema domain, immunoglobulin domain (Ig), tran    | 44989101  | 45003397  | TC1900000660.mm.1 | 0.0  | 0.839845 |
| TC1700000064.mm.1 | NR_035481          | Mir1956 | microRNA 1956                                    | 138526415 | 138526494 | TC0300001417.mm.1 | 0.0  | 0.840109 |
| TC1700000069.mm.1 | NM_001242941_2     | Gm3488  | predicted gene, 3488                             | 5501674   | 5522929   | TC1400000046.mm.1 | 0.0  | 0.840238 |
| TC1700000070.mm.1 | NM_001001444       | Defb29  | defensin beta 29                                 | 152538714 | 152540098 | TC0200004903.mm.1 | 0.0  | 0.840242 |
| TC1700000075.mm.1 | NM_001111288       | Sco2    | SCO cytochrome oxidase deficient homolog 2 (ye   | 89371637  | 89377039  | TC1500002052.mm.1 | 0.0  | 0.840513 |
| TC1700000077.mm.1 | ENSMUST00000083041 | Gm24316 | predicted gene, 24316                            | 50731053  | 50731159  | TC1400000565.mm.1 | 0.0  | 0.840623 |
| TC1700000078.mm.1 | NR_030422          | Mir551b | microRNA 551b                                    | 29416823  | 29416920  | TC0300000192.mm.1 | 0.0  | 0.840732 |
| TC1700000081.mm.1 | XR_105192          | 2810030 | RIKEN cDNA 2810030D12 gene                       | 13200701  | 13207713  | TC0800000124.mm.1 | 0.0  | 0.840964 |
| TC1700000096.mm.1 | ENSMUST00000108332 | Gm7452  | predicted pseudogene 7452                        | 36956644  | 36960417  | TC0600000356.mm.1 | 0.0  | 0.841284 |
| TC1700000099.mm.1 | ENSMUST00000104311 | Gm23604 | predicted gene, 23604                            | 45581616  | 45581747  | TC0800002148.mm.1 | 0.0  | 0.841856 |
| TC1700000110.mm.1 | ENSMUST00000175258 | Gm23921 | predicted gene, 23921                            | 25868945  | 25869051  | TC0700000429.mm.1 | 0.0  | 0.841896 |
| TC1700000124.mm.1 | NM_001166847       | Vmn1r11 | vomer nasals 1 receptor 112                      | 20771185  | 20772078  | TC0700000323.mm.1 | 0.0  | 0.84195  |
| TC1700000144.mm.1 | ENSMUST00000175419 | Gm22773 | predicted gene, 22773                            | 172864264 | 172864341 | TC0200005280.mm.1 | 0.0  | 0.842106 |
| TC1700000158.mm.1 | NM_021506          | Sh3rf1  | SH3 domain containing ring finger 1              | 61224171  | 61396072  | TC0800000653.mm.1 | 0.0  | 0.842124 |
| TC1700000170.mm.1 | NM_001005788       | Zfp69   | zinc finger protein 69                           | 120930137 | 120951701 | TC0400003446.mm.1 | 0.0  | 0.842148 |
| TC1700000194.mm.1 | NM_029288          | Gm10413 | predicted gene 10413                             | 3395093   | 3562944   | TC1400000006.mm.1 | 0.0  | 0.842223 |
| TC1700000198.mm.1 | NR_029765          | Mir337  | microRNA 337                                     | 109585789 | 109585886 | TC1200001130.mm.1 | 0.0  | 0.84246  |

|                   |                    |         |                                                 |           |           |                   |      |          |
|-------------------|--------------------|---------|-------------------------------------------------|-----------|-----------|-------------------|------|----------|
| TC1700000200.mm.1 | NM_010744          | Tmed1   | transmembrane emp24 domain containing 1         | 21507380  | 21510234  | TC0900001874.mm.1 | 0.0  | 0.842479 |
| TC1700000223.mm.1 | NM_010745          | Ly86    | lymphocyte antigen 86                           | 37345345  | 37419036  | TC1300000425.mm.1 | 0.1  | 0.842527 |
| TC1700000225.mm.1 | NM_026627          | H2afb1  | H2A histone family, member B1                   | 17996417  | 17996958  | TC0200003023.mm.1 | 0.0  | 0.842973 |
| TC1700000248.mm.1 | NM_178899          | Hepacam | HEPACAM family member 2                         | 3457089   | 3498297   | TC0600001788.mm.1 | 0.0  | 0.843651 |
| TC1700000269.mm.1 | NM_001081181       | 9430016 | RIKEN cDNA 9430016H08 gene                      | 57406328  | 57417953  | TC0100000422.mm.1 | 0.0  | 0.843743 |
| TC1700000270.mm.1 | ENSMUST00000179783 | Gm22616 | predicted gene, 22616                           | 14182578  | 14182677  | TC0100000076.mm.1 | 0.1  | 0.843813 |
| TC1700000274.mm.1 | NM_001031851       | Agxt2   | alanine-glyoxylate aminotransferase 2           | 10358532  | 10410153  | TC1500002328.mm.1 | 0.0  | 0.843832 |
| TC1700000290.mm.1 | ENSMUST00000158060 | Gm23995 | predicted gene, 23995                           | 144774425 | 144774553 | TC0500001758.mm.1 | 0.0  | 0.843878 |
| TC1700000293.mm.1 | NM_001033314       | Ccdc61  | coiled-coil domain containing 61                | 18890883  | 18910415  | TC0700002462.mm.1 | 0.0  | 0.843879 |
| TC1700000308.mm.1 | NM_011773          | Slc30a3 | solute carrier family 30 (zinc transporter), me | 31086106  | 31108237  | TC0500002172.mm.1 | 0.0  | 0.8439   |
| TC1700000315.mm.1 | ENSMUST00000043104 | CR2     | ---                                             | 195165745 | 195171168 | TC0100003857.mm.1 | -0.1 | 0.844254 |
| TC1700000324.mm.1 | NM_010762          | Mal     | myelin and lymphocyte protein, T cell different | 127633226 | 127656695 | TC0200004563.mm.1 | 0.0  | 0.844295 |
| TC1700000331.mm.1 | NCBI_Gene:780800:p | Ighv7-2 | immunoglobulin heavy variable 7-2               | 113912025 | 113912483 | TC1200002575.mm.1 | 0.0  | 0.844477 |
| TC1700000334.mm.1 | ENSMUST00000103799 | Gm24115 | predicted gene, 24115                           | 109148589 | 109148698 | TC0200004298.mm.1 | 0.0  | 0.844527 |
| TC1700000337.mm.1 | ENSMUST00000180244 | Gm24169 | predicted gene, 24169                           | 37256784  | 37256893  | TC0300001868.mm.1 | 0.0  | 0.844527 |
| TC1700000339.mm.1 | ENSMUST00000103761 | Gm22066 | predicted gene, 22066                           | 123015259 | 123015368 | TC0300002871.mm.1 | 0.0  | 0.844527 |
| TC1700000344.mm.1 | ENSMUST00000103849 | Gm24721 | predicted gene, 24721                           | 124735839 | 124735948 | TC0400001424.mm.1 | 0.0  | 0.844527 |
| TC1700000347.mm.1 | ENSMUST00000179516 | Gm22619 | predicted gene, 22619                           | 93745888  | 93745997  | TC0400003060.mm.1 | 0.0  | 0.844527 |
| TC1700000351.mm.1 | ENSMUST00000180047 | Gm23243 | predicted gene, 23243                           | 12940370  | 12940479  | TC0500000083.mm.1 | 0.0  | 0.844527 |
| TC1700000354.mm.1 | ENSMUST00000103827 | Gm22190 | predicted gene, 22190                           | 131532922 | 131533031 | TC0600001552.mm.1 | 0.0  | 0.844527 |
| TC1700000355.mm.1 | ENSMUST00000179692 | Gm26506 | predicted gene, 26506                           | 103581267 | 103581376 | TC0700001499.mm.1 | 0.0  | 0.844527 |
| TC1700000356.mm.1 | ENSMUST00000177728 | Gm25349 | predicted gene, 25349                           | 4388452   | 4388561   | TC0700002154.mm.1 | 0.0  | 0.844527 |
| TC1700000365.mm.1 | ENSMUST00000178240 | Gm24752 | predicted gene, 24752                           | 4393011   | 4393120   | TC0700002155.mm.1 | 0.0  | 0.844527 |
| TC1700000367.mm.1 | ENSMUST00000103763 | Gm24932 | predicted gene, 24932                           | 107319654 | 107319763 | TC0700004035.mm.1 | 0.0  | 0.844527 |
| TC1700000374.mm.1 | ENSMUST00000103937 | Gm26399 | predicted gene, 26399                           | 97255841  | 97255950  | TC0800001157.mm.1 | 0.0  | 0.844527 |
| TC1700000382.mm.1 | ENSMUST00000178476 | Gm25649 | predicted gene, 25649                           | 62013035  | 62013144  | TC1300002158.mm.1 | 0.0  | 0.844527 |
| TC1700000383.mm.1 | ENSMUST00000103831 | Gm22191 | predicted gene, 22191                           | 40215132  | 40215241  | TC1400001775.mm.1 | 0.0  | 0.844527 |
| TC1700000394.mm.1 | ENSMUST00000178681 | Gm25548 | predicted gene, 25548                           | 35440254  | 35440363  | TC1600001549.mm.1 | 0.0  | 0.844527 |
| TC1700000402.mm.1 | ENSMUST00000103753 | Gm22065 | predicted gene, 22065                           | 73624928  | 73625037  | TC1800000775.mm.1 | 0.0  | 0.844527 |
| TC1700000403.mm.1 | NM_001130513       | Ace2    | angiotensin I converting enzyme (peptidyl-dipep | 164139332 | 164188420 | TC0X00001663.mm.1 | 0.0  | 0.844539 |
| TC1700000404.mm.1 | ENSMUST00000117779 | Gm15302 | predicted gene 15302                            | 21330947  | 21333576  | TC0800000232.mm.1 | 0.0  | 0.844554 |
| TC1700000408.mm.1 | NM_025613          | Eid1    | EP300 interacting inhibitor of differentiation  | 125673095 | 125675643 | TC0200001886.mm.1 | 0.0  | 0.844619 |
| TC1700000409.mm.1 | ENSMUST00000104296 | Gm25274 | predicted gene, 25274                           | 8945045   | 8945179   | TC1300000047.mm.1 | 0.0  | 0.844682 |
| TC1700000411.mm.1 | NM_010885          | Ndufa2  | NADH dehydrogenase (ubiquinone) 1 alpha subc    | 36742332  | 36744587  | TC1800001198.mm.1 | 0.0  | 0.844732 |
| TC1700000418.mm.1 | ENSMUST00000097296 | Gm17199 | predicted gene 17199                            | 29855640  | 29856055  | TC0700002733.mm.1 | 0.0  | 0.844941 |
| TC1700000424.mm.1 | ENSMUST00000173427 | Gm8752  | predicted pseudogene 8752                       | 35445856  | 35448926  | TC1700000687.mm.1 | 0.0  | 0.845222 |
| TC1700000425.mm.1 | NM_009320          | Slc6a6  | solute carrier family 6 (neurotransmitter trans | 91684067  | 91759063  | TC0600001092.mm.1 | 0.0  | 0.845446 |
| TC1700000426.mm.1 | XR_141199          | Gm16440 | predicted gene 16440                            | 6380721   | 6390319   | TC1400001410.mm.1 | 0.0  | 0.845531 |
| TC1700000431.mm.1 | NM_001198871       | Scgb2b7 | secretoglobulin, family 2B, member 7            | 31703779  | 31705754  | TC0700002796.mm.1 | 0.0  | 0.845572 |
| TC1700000461.mm.1 | ENSMUST00000183064 | Gm7497  | predicted gene 7497                             | 9748722   | 9749724   | TC1800000066.mm.1 | 0.0  | 0.845714 |
| TC1700000466.mm.1 | NM_013674          | Irf4    | interferon regulatory factor 4                  | 30749226  | 30766927  | TC1300000338.mm.1 | 0.0  | 0.845757 |
| TC1700000480.mm.1 | NM_008790          | Pcp2    | Purkinje cell protein 2 (L7)                    | 3623371   | 3625545   | TC0800001613.mm.1 | 0.0  | 0.845882 |
| TC1700000484.mm.1 | ENSMUST00000121660 | Gm11918 | predicted gene 11918                            | 29125946  | 29126124  | TC0400000238.mm.1 | 0.0  | 0.846052 |
| TC1700000487.mm.1 | ENSMUST00000121933 | Gm5398  | predicted gene 5398                             | 77289832  | 77290815  | TC0X00002498.mm.1 | 0.0  | 0.846148 |
| TC1700000496.mm.1 | ENSMUST00000104419 | Gm25803 | predicted gene, 25803                           | 81338274  | 81338404  | TC0400002919.mm.1 | 0.0  | 0.846179 |
| TC1700000501.mm.1 | NM_133947          | Numa1   | nuclear mitotic apparatus protein 1             | 101934111 | 102014959 | TC0700001444.mm.1 | 0.0  | 0.846323 |
| TC1700000502.mm.1 | ENSMUST00000174682 | Vmn2r-p | vomeronasal 2, receptor, pseudogene 37          | 7641854   | 7645329   | TC0700002238.mm.1 | 0.0  | 0.846413 |
| TC1700000505.mm.1 | NM_019397          | Egfl6   | EGF-like-domain, multiple 6                     | 166523007 | 166585720 | TC0X00003349.mm.1 | 0.0  | 0.846649 |
| TC1700000507.mm.1 | ENSMUST00000185196 | AC15920 | N/A                                             | 58749589  | 58749684  | TC1600001777.mm.1 | 0.0  | 0.846724 |
| TC1700000513.mm.1 | NM_028208          | Ptar1   | protein prenyltransferase alpha subunit repeat  | 23687400  | 23721129  | TC1900000382.mm.1 | 0.0  | 0.846824 |
| TC1700000527.mm.1 | ENSMUST00000104473 | n-R5s51 | nuclear encoded rRNA 5S 51                      | 118826909 | 118827031 | TC0400002718.mm.1 | 0.0  | 0.846973 |
| TC1700000528.mm.1 | ENSMUST00000118175 | Gm11929 | predicted gene 11929                            | 32207148  | 32208092  | TC0400000253.mm.1 | 0.0  | 0.84723  |
| TC1700000533.mm.1 | NM_001277340       | Aldoa2  | aldolase 1 A, retrogene 2                       | 55565135  | 55566896  | TC1200000471.mm.1 | 0.0  | 0.847411 |
| TC1700000535.mm.1 | ENSMUST00000113842 | Gm5138  | predicted gene 5138                             | 83874199  | 83875380  | TC0600002586.mm.1 | 0.0  | 0.847666 |
| TC1700000539.mm.1 | ENSMUST00000106032 | M6pr-ps | mannose-6-phosphate receptor, pseudogene        | 99500024  | 99502645  | TC0300000991.mm.1 | 0.0  | 0.848019 |
| TC1700000542.mm.1 | ENSMUST00000119457 | Gm14788 | predicted gene 14788                            | 91289277  | 91289651  | TC0X00000864.mm.1 | 0.0  | 0.848457 |
| TC1700000548.mm.1 | ENSMUST00000177767 | Gm8355  | predicted pseudogene 8355                       | 14745362  | 14746117  | TC1000001793.mm.1 | 0.0  | 0.848539 |
| TC1700000559.mm.1 | NM_026213          | Ttc33   | tetratricopeptide repeat domain 33              | 5185525   | 5218336   | TC1500000022.mm.1 | 0.0  | 0.848611 |
| TC1700000560.mm.1 | NM_178933          | Slc51b  | solute carrier family 51, beta subunit          | 65412753  | 65422773  | TC0900002510.mm.1 | 0.0  | 0.848644 |
| TC1700000563.mm.1 | NR_030471          | Mir669a | microRNA 669a-3                                 | 10474433  | 10474541  | TC0500000106.mm.1 | 0.0  | 0.848679 |
| TC1700000564.mm.1 | NM_146778          | Olfr120 | olfactory receptor 1208                         | 88896574  | 88897648  | TC0200004029.mm.1 | 0.0  | 0.848789 |
| TC1700000571.mm.1 | ENSMUST00000157854 | Gm23077 | predicted gene, 23077                           | 104201110 | 104201225 | TC0300001072.mm.1 | 0.0  | 0.848901 |
| TC1700000585.mm.1 | NR_003967          | Gm4759  | GTPase, very large interferon inducible 1 pseud | 106417848 | 106441073 | TC0700004008.mm.1 | -0.1 | 0.848913 |
| TC1700000595.mm.1 | ENSMUST00000102235 | Gm23256 | predicted gene, 23256                           | 42958351  | 42958460  | TC0700000749.mm.1 | 0.0  | 0.848989 |
| TC1700000604.mm.1 | ENSMUST00000121849 | Defa-ps | defensin, alpha, pseudogene 17                  | 21473251  | 21473421  | TC0800000241.mm.1 | 0.0  | 0.849028 |
| TC1700000605.mm.1 | NR_039552          | Mir3970 | microRNA 3970                                   | 33157112  | 33157201  | TC1900000481.mm.1 | 0.0  | 0.849226 |
| TC1700000611.mm.1 | NM_026698          | Tmem129 | transmembrane protein 129                       | 33653216  | 33657977  | TC0500002221.mm.1 | 0.0  | 0.849341 |
| TC1700000614.mm.1 | NM_172480          | Mtrr    | 5-methyltetrahydrofolate-homocysteine methyl    | 68560780  | 68582121  | TC1300002269.mm.1 | 0.0  | 0.849405 |
| TC1700000615.mm.1 | ENSMUST00000103905 | Gm24096 | predicted gene, 24096                           | 70147936  | 70148045  | TC0600002450.mm.1 | 0.0  | 0.849905 |
| TC1700000618.mm.1 | NM_007655          | Cd79a   | CD79A antigen (immunoglobulin-associated alph   | 24897381  | 24902197  | TC0700000402.mm.1 | -0.1 | 0.850147 |
| TC1700000621.mm.1 | ENSMUST00000083121 | n-R5s21 | nuclear encoded rRNA 5S 213                     | 82635013  | 82635110  | TC0100000707.mm.1 | -0.1 | 0.85018  |
| TC1700000622.mm.1 | ENSMUST00000104399 | Gm24376 | predicted gene, 24376                           | 44412469  | 44412595  | TC0400002560.mm.1 | 0.0  | 0.85022  |
| TC1700000628.mm.1 | NM_001099674       | 1810022 | RIKEN cDNA 1810022K09 gene                      | 14606289  | 14611256  | TC0300001666.mm.1 | 0.0  | 0.850274 |
| TC1700000639.mm.1 | NM_177893          | Fan1    | FANCD2/FANCI-associated nuclease 1              | 64346758  | 64374095  | TC0700003412.mm.1 | 0.0  | 0.850307 |
| TC1700000642.mm.1 | NR_030448          | Mir680- | microRNA 680-2                                  | 144297790 | 144297899 | TC0X00001420.mm.1 | 0.0  | 0.850634 |
| TC1700000644.mm.1 | ENSMUST00000083025 | n-R5s41 | nuclear encoded rRNA 5S 41                      | 82342653  | 82342771  | TC1500000751.mm.1 | -0.1 | 0.850768 |
| TC1700000646.mm.1 | ENSMUST00000116972 | Gm22676 | predicted gene, 22676                           | 112500869 | 112500997 | TC0200001676.mm.1 | 0.1  | 0.850951 |
| TC1700000651.mm.1 | ENSMUST00000122692 | n-R5s21 | nuclear encoded rRNA 5S 21                      | 43932316  | 43932432  | TC1900000641.mm.1 | 0.0  | 0.850996 |

|                   |                    |         |                                                   |           |           |                    |      |          |
|-------------------|--------------------|---------|---------------------------------------------------|-----------|-----------|--------------------|------|----------|
| TC1700000652.mm.1 | ENSMUST00000157979 | Gm25820 | predicted gene, 25820                             | 88693930  | 88694057  | TC0300000734.mm.1  | 0.1  | 0.85106  |
| TC1700000661.mm.1 | ENSMUST00000093750 | Gm22365 | predicted gene, 22365                             | 61164365  | 61164481  | TC1900001759.mm.1  | 0.0  | 0.851514 |
| TC1700000662.mm.1 | ENSMUST00000121523 | Gm12097 | predicted gene, 12097                             | 30572791  | 30574454  | TC1100002440.mm.1  | 0.0  | 0.851769 |
| TC1700000667.mm.1 | ENSMUST00000117732 | Gm11185 | predicted gene 11185                              | 83193988  | 83194994  | TC0400000831.mm.1  | 0.0  | 0.851914 |
| TC1700000673.mm.1 | NM_001104547       | Vmn2r96 | vomeronasal 2, receptor 96                        | 18581727  | 18598157  | TC1700000223.mm.1  | 0.0  | 0.85194  |
| TC1700000679.mm.1 | NM_172287          | Spire2  | spire homolog 2 (Drosophila)                      | 123332713 | 123369518 | TC0800001518.mm.1  | 0.0  | 0.8521   |
| TC1700000681.mm.1 | NM_011817          | Gadd45g | growth arrest and DNA-damage-inducible 45 gar     | 51846675  | 51848475  | TC1300000607.mm.1  | 0.0  | 0.852187 |
| TC1700000684.mm.1 | NM_019952          | Clcf1   | cardiotrophin-like cytokine factor 1              | 4214238   | 4223490   | TC1900000305.mm.1  | 0.0  | 0.852471 |
| TC1700000686.mm.1 | NM_178719          | Smcr7l  | Smith-Magenis syndrome chromosome region, c       | 80234080  | 80253371  | TC1500000696.mm.1  | 0.0  | 0.85259  |
| TC1700000687.mm.1 | ENSMUST00000182691 | Gm7286  | predicted gene 7286                               | 45835929  | 45836935  | TC0900002207.mm.1  | 0.0  | 0.853014 |
| TC1700000694.mm.1 | NM_024444          | Cyp4f18 | cytochrome P450, family 4, subfamily f, polypep   | 71988482  | 72009626  | TC0800002447.mm.1  | 0.0  | 0.853043 |
| TC1700000703.mm.1 | NM_009883          | Cebpb   | CCAAT/enhancer binding protein (C/EBP), beta      | 167688915 | 167690432 | TC0200002594.mm.1  | 0.0  | 0.853656 |
| TC1700000705.mm.1 | ENSMUST00000177751 | Gm21835 | predicted gene, 21835                             | 37430489  | 37431157  | TC0Y00000119.mm.1  | 0.0  | 0.853842 |
| TC1700000706.mm.1 | ENSMUST00000103832 | Gm22323 | predicted gene, 22323                             | 13599660  | 13599768  | TC1900001184.mm.1  | 0.0  | 0.853947 |
| TC1700000707.mm.1 | ENSMUST00000174934 | Gm25262 | predicted gene, 25262                             | 43631425  | 43631557  | TC0400000445.mm.1  | 0.0  | 0.853984 |
| TC1700000724.mm.1 | NM_025539          | Nudt2   | nudix (nucleoside diphosphate linked moiety X)-   | 41465148  | 41480926  | TC0400000374.mm.1  | 0.0  | 0.854062 |
| TC1700000737.mm.1 | ENSMUST00000042061 | Gm5519  | predicted pseudogene 5519                         | 33822908  | 33825071  | TC1900000485.mm.1  | 0.0  | 0.854355 |
| TC1700000740.mm.1 | NM_013807          | Plk3    | polo-like kinase 3                                | 117128655 | 117133963 | TC0400000361.mm.1  | 0.0  | 0.854671 |
| TC1700000741.mm.1 | NM_020505          | Vav3    | vav 3 oncogene                                    | 109340653 | 109685698 | TC0300001161.mm.1  | 0.0  | 0.854983 |
| TC1700000760.mm.1 | NM_001193619       | Cldn7   | claudin 7                                         | 69964779  | 69967886  | TC1100000932.mm.1  | 0.0  | 0.855172 |
| TC1700000761.mm.1 | NM_019819          | Dusp14  | dual specificity phosphatase 14                   | 84048041  | 84069261  | TC1100003406.mm.1  | 0.0  | 0.855365 |
| TC1700000765.mm.1 | ENSMUST00000082502 | Gm25589 | predicted gene, 25589                             | 29113441  | 29113606  | TC0600001969.mm.1  | 0.0  | 0.855594 |
| TC1700000766.mm.1 | ENSMUST00000184153 | AC13550 | N/A                                               | 82193755  | 82193864  | TC1700001231.mm.1  | 0.0  | 0.855714 |
| TC1700000775.mm.1 | ENSMUST00000103822 | Gm22189 | predicted gene, 22189                             | 19891976  | 19892061  | TC1200000170.mm.1  | 0.0  | 0.855763 |
| TC1700000779.mm.1 | ENSMUST00000158322 | Gm23257 | predicted gene, 23257                             | 43692686  | 43692817  | TC0400000449.mm.1  | 0.0  | 0.855832 |
| TC1700000786.mm.1 | ENSMUST00000093724 | Gm26327 | predicted gene, 26327                             | 39630392  | 39630502  | TC0700000708.mm.1  | 0.0  | 0.855902 |
| TC1700000788.mm.1 | NM_026630          | Gtsf1l  | gametocyte specific factor 1-like                 | 163087031 | 163089601 | TC0200005087.mm.1  | 0.0  | 0.855927 |
| TC1700000789.mm.1 | ENSMUST00000158583 | Gm26216 | predicted gene, 26216                             | 47290956  | 47291028  | TC1700000908.mm.1  | 0.0  | 0.856113 |
| TC1700000790.mm.1 | NM_026885          | Chmp2a  | charged multivesicular body protein 2A            | 13032006  | 13034777  | TC0700002359.mm.1  | 0.0  | 0.856195 |
| TC1700000791.mm.1 | NR_039545          | Mir378b | microRNA 378b                                     | 88352773  | 88352864  | TC1100001374.mm.1  | 0.0  | 0.856207 |
| TC1700000794.mm.1 | ENSMUST00000175094 | Gm24819 | predicted gene, 24819                             | 41577909  | 41578074  | TC1300001866.mm.1  | 0.0  | 0.856593 |
| TC1700000810.mm.1 | ENSMUST00000175272 | Gm22461 | predicted gene, 22461                             | 97941671  | 97941740  | TC1100003660.mm.1  | 0.0  | 0.856615 |
| TC1700000811.mm.1 | ENSMUST00000175331 | Gm25950 | predicted gene, 25950                             | 114580495 | 114580594 | TC1300001315.mm.1  | 0.0  | 0.856834 |
| TC1700000812.mm.1 | NM_026386          | Snx2    | sorting nexin 2                                   | 53176365  | 53220860  | TC1800000534.mm.1  | 0.0  | 0.85694  |
| TC1700000814.mm.1 | NR_029747          | Mir31   | microRNA 31                                       | 88910557  | 88910662  | TC0400003027.mm.1  | 0.0  | 0.856988 |
| TC1700000819.mm.1 | NR_003634          | Rps4y2  | ribosomal protein S4, Y-linked 2                  | 148354656 | 148355598 | TC0600001754.mm.1  | 0.0  | 0.85717  |
| TC1700000820.mm.1 | NCBI_Gene:380795:p | Ighg3   | Ighg3 Immunoglobulin heavy constant gamma 3       | 113356223 | 113366477 | TC1200002541.mm.1  | 0.0  | 0.857335 |
| TC1700000829.mm.1 | NM_001162366       | Ptk2b   | PTK2 protein tyrosine kinase 2 beta               | 66153257  | 66281052  | TC1400002267.mm.1  | 0.0  | 0.857399 |
| TC1700000834.mm.1 | NR_039553          | Mir3971 | microRNA 3971                                     | 75551429  | 75551511  | TC1100001073.mm.1  | 0.0  | 0.857683 |
| TC1700000839.mm.1 | ENSMUST00000122564 | n-R5s17 | nuclear encoded rRNA 5S 179                       | 148753323 | 148753440 | TC0500003643.mm.1  | 0.0  | 0.857771 |
| TC1700000842.mm.1 | NR_027958          | D930048 | RIKEN cDNA D930048N14 gene                        | 51650954  | 51657681  | TC1100000574.mm.1  | 0.0  | 0.858076 |
| TC1700000846.mm.1 | ENSMUST00000157341 | Gm25390 | predicted gene, 25390                             | 91005741  | 91005843  | TC1000001109.mm.1  | 0.0  | 0.858151 |
| TC1700000854.mm.1 | ENSMUST00000103977 | Gm25546 | predicted gene, 25546                             | 94681255  | 94681386  | TC1500002112.mm.1  | 0.0  | 0.858275 |
| TC1700000860.mm.1 | ENSMUST00000158083 | Gm25558 | predicted gene, 25558                             | 50887950  | 50888055  | TC0900000611.mm.1  | 0.0  | 0.858365 |
| TC1700000862.mm.1 | ENSMUST00000083136 | n-R5s19 | nuclear encoded rRNA 5S 196                       | 51828912  | 51829028  | TC0300000370.mm.1  | 0.0  | 0.858402 |
| TC1700000865.mm.1 | ENSMUST00000184498 | AC20184 | N/A                                               | 20134948  | 20135057  | TC0Y00000055.mm.1  | 0.0  | 0.858526 |
| TC1700000867.mm.1 | NM_001098231       | Pdp1    | pyruvate dehydrogenase phosphatase catalytic su   | 11958184  | 11966452  | TC0400002216.mm.1  | 0.0  | 0.858645 |
| TC1700000896.mm.1 | ENSMUST00000120392 | Gm4773  | predicted gene 4773                               | 80061011  | 80061712  | TC0X00002531.mm.1  | 0.0  | 0.858654 |
| TC1700000900.mm.1 | NM_020016          | Magea2  | melanoma antigen, family A, 2                     | 155027201 | 155093666 | TC0X00003231.mm.1  | 0.0  | 0.858708 |
| TC1700000902.mm.1 | NM_007895          | Ear2    | eosinophil-associated, ribonuclease A family, m   | 44102654  | 44103538  | TC1400000459.mm.1  | 0.0  | 0.858763 |
| TC1700000904.mm.1 | NM_001024932       | Pilrb2  | paired immunoglobulin-like type 2 receptor beta 2 | 137865829 | 137871758 | TC0500003465.mm.1  | 0.0  | 0.859003 |
| TC1700000908.mm.1 | ENSMUST00000184707 | DLEU2_5 | Deleted in lymphocytic leukemia 2 conserved re    | 61643371  | 61643455  | TC1400000870.mm.1  | 0.0  | 0.859008 |
| TC1700000914.mm.1 | NM_001039511       | Ivns1ab | influenza virus NS1A binding protein              | 151344498 | 151364445 | TC0100001351.mm.1  | 0.0  | 0.859128 |
| TC1700000925.mm.1 | NM_008096          | Gc      | group specific component                          | 89417511  | 89457898  | TC0500002717.mm.1  | -0.1 | 0.859429 |
| TC1700000927.mm.1 | NM_008260          | Foxa3   | forkhead box A3                                   | 19013282  | 19023539  | TC0700002468.mm.1  | 0.0  | 0.859491 |
| TC1700000935.mm.1 | ENSMUST00000158378 | Gm23854 | predicted gene, 23854                             | 64304637  | 64304744  | TC1000002295.mm.1  | 0.0  | 0.859602 |
| TC1700000937.mm.1 | NM_022816          | Acot10  | acyl-CoA thioesterase 10                          | 20665214  | 20666750  | TC1500001259.mm.1  | 0.0  | 0.859802 |
| TC1700000945.mm.1 | XR_106205          | A030003 | RIKEN cDNA A030003K02 gene                        | 78030006  | 78032665  | TC1100003281.mm.1  | 0.0  | 0.85991  |
| TC1700000947.mm.1 | NM_001199960       | Ccl27b  | chemokine (C-C motif) ligand 27b                  | 42650604  | 42656005  | TC0400000413.mm.1  | 0.0  | 0.860154 |
| TC1700000955.mm.1 | NM_020596          | Egr4    | early growth response 4                           | 85511122  | 85513589  | TC06000002615.mm.1 | 0.0  | 0.860181 |
| TC1700000956.mm.1 | ENSMUST00000177777 | Gm13072 | predicted gene 13072                              | 149457297 | 149457872 | TC0400001947.mm.1  | -0.1 | 0.860187 |
| TC1700000957.mm.1 | ENSMUST00000104371 | Gm23175 | predicted gene, 23175                             | 33959069  | 33959200  | TC0300001818.mm.1  | 0.0  | 0.860317 |
| TC1700000973.mm.1 | NM_025842          | Vps28   | vacuolar protein sorting 28 (yeast)               | 76622088  | 76626037  | TC1500002348.mm.1  | 0.0  | 0.860334 |
| TC1700000983.mm.1 | XM_001477440       | Gm20911 | predicted gene, 20911                             | 81457992  | 81483890  | TC0Y00000205.mm.1  | 0.0  | 0.860619 |
| TC1700000990.mm.1 | NR_002880          | Gm21944 | defensin beta 48 pseudogene                       | 20876499  | 20889113  | TC0800000208.mm.1  | 0.0  | 0.860629 |
| TC1700000991.mm.1 | NM_144515          | Zfp52   | zinc finger protein 52                            | 21535539  | 21562602  | TC1700000274.mm.1  | 0.0  | 0.860919 |
| TC1700000997.mm.1 | NM_025331          | Gng11   | guanine nucleotide binding protein (G protein),   | 4003943   | 4008446   | TC0600000007.mm.1  | 0.0  | 0.860976 |
| TC1700000998.mm.1 | NM_025567          | Cyc1    | cytochrome c-1                                    | 76343523  | 76345937  | TC1500000587.mm.1  | 0.0  | 0.861189 |
| TC1700001012.mm.1 | ENSMUST00000104455 | Gm24985 | predicted gene, 24985                             | 13111299  | 13111427  | TC0600000093.mm.1  | 0.0  | 0.861374 |
| TC1700001015.mm.1 | ENSMUST00000175322 | Gm23152 | predicted gene, 23152                             | 166655027 | 166655142 | TC02000005176.mm.1 | 0.1  | 0.861572 |
| TC1700001032.mm.1 | ENSMUST00000171455 | Gm17572 | predicted gene, 17572                             | 31950549  | 31950968  | TC1700000548.mm.1  | 0.0  | 0.861635 |
| TC1700001033.mm.1 | ENSMUST00000158724 | Gm22670 | predicted gene, 22670                             | 47920755  | 47920897  | TC0400000526.mm.1  | 0.0  | 0.861688 |
| TC1700001038.mm.1 | ENSMUST00000134226 | Gm12590 | predicted gene 12590                              | 121882333 | 121883863 | TC1100004257.mm.1  | 0.1  | 0.861733 |
| TC1700001045.mm.1 | ENSMUST00000119869 | Gm12420 | predicted gene 12420                              | 84697863  | 84698910  | TC0400000847.mm.1  | 0.0  | 0.86178  |
| TC1700001047.mm.1 | ENSMUST00000157857 | Gm23641 | predicted gene, 23641                             | 150551707 | 150551807 | TC0500003682.mm.1  | 0.0  | 0.862082 |
| TC1700001051.mm.1 | ENSMUST00000104570 | Gm23527 | predicted gene, 23527                             | 116371939 | 116372068 | TC0600002974.mm.1  | 0.0  | 0.862149 |
| TC1700001053.mm.1 | NM_133932          | Tada3   | transcriptional adaptor 3                         | 113366025 | 113377883 | TC0600002918.mm.1  | 0.0  | 0.862158 |
| TC1700001069.mm.1 | NM_011574          | Cirh1a  | cirrhosis, autosomal recessive 1A (human)         | 106893640 | 106923094 | TC0800001258.mm.1  | 0.0  | 0.862205 |

|                   |                    |         |                                                 |           |           |                   |      |          |
|-------------------|--------------------|---------|-------------------------------------------------|-----------|-----------|-------------------|------|----------|
| TC1700001082.mm.1 | ENSMUST00000083932 | Gm24032 | predicted gene, 24032                           | 95896962  | 95897120  | TC1300002464.mm.1 | 0.0  | 0.862341 |
| TC1700001083.mm.1 | NM_016736          | Nub1    | negative regulator of ubiquitin-like proteins 1 | 24685815  | 24710555  | TC0500000221.mm.1 | 0.0  | 0.862556 |
| TC1700001084.mm.1 | ENSMUST00000157656 | Gm23585 | predicted gene, 23585                           | 45254453  | 45254454  | TC0700003000.mm.1 | 0.0  | 0.86364  |
| TC1700001101.mm.1 | ENSMUST00000103967 | Gm24582 | predicted gene, 24582                           | 57741300  | 57741402  | TC1100000666.mm.1 | 0.0  | 0.863764 |
| TC1700001110.mm.1 | ENSMUST00000104222 | Gm23750 | predicted gene, 23750                           | 114824154 | 114824285 | TC0300002790.mm.1 | 0.0  | 0.863932 |
| TC1700001139.mm.1 | ENSMUST00000082581 | n-R5s16 | nuclear encoded rRNA 5S 162                     | 60250792  | 60250910  | TC0600000722.mm.1 | -0.1 | 0.864013 |
| TC1700001140.mm.1 | ENSMUST00000060680 | 2010001 | RIKEN cDNA 2010001K21 gene                      | 47010673  | 47011195  | TC1300000540.mm.1 | 0.0  | 0.864102 |
| TC1700001143.mm.1 | NM_001033441       | Alg10b  | asparagine-linked glycosylation 10B (alpha-1,2- | 90224311  | 90230554  | TC1500000886.mm.1 | 0.0  | 0.864185 |
| TC1700001145.mm.1 | NM_198028          | Serpinb | serine (or cysteine) peptidase inhibitor, clade | 107529003 | 107549271 | TC0100003867.mm.1 | 0.0  | 0.864371 |
| TC1700001147.mm.1 | ENSMUST00000179849 | Gm21802 | predicted gene, 21802                           | 83361698  | 83362381  | TC0Y00000510.mm.1 | 0.0  | 0.864402 |
| TC1700001148.mm.1 | ENSMUST00000182234 | Gm4804  | predicted gene 4804                             | 15728097  | 15729095  | TC1200000122.mm.1 | 0.0  | 0.864432 |
| TC1700001151.mm.1 | NM_146148          | C8a     | complement component 8, alpha polypeptide       | 104815679 | 104876398 | TC0400003184.mm.1 | 0.0  | 0.864732 |
| TC1700001155.mm.1 | NM_134073          | Kctd9   | potassium channel tetramerisation domain cont   | 67715937  | 67742310  | TC1400000962.mm.1 | 0.0  | 0.864771 |
| TC1700001156.mm.1 | NM_028643          | Micu2   | mitochondrial calcium uptake 2                  | 57916280  | 57999262  | TC1400002152.mm.1 | 0.0  | 0.864786 |
| TC1700001162.mm.1 | NM_009693          | Apob    | apolipoprotein B                                | 7977648   | 8016839   | TC1200000057.mm.1 | 0.0  | 0.864862 |
| TC1700001163.mm.1 | XR_106376          | Gm11772 | predicted gene 11772                            | 120235187 | 120236122 | TC1100004201.mm.1 | 0.0  | 0.865086 |
| TC1700001168.mm.1 | NM_027279          | Mettl18 | methyltransferase like 18                       | 163994889 | 163997244 | TC0100001494.mm.1 | 0.0  | 0.865086 |
| TC1700001173.mm.1 | NM_011540          | Tcap    | titin-cap                                       | 98383811  | 98384953  | TC1100001566.mm.1 | 0.0  | 0.865414 |
| TC1700001175.mm.1 | ENSMUST00000179436 | Cd99    | CD99 antigen                                    | 66        | 1479      | TC4_JH584295_rand | 0.0  | 0.865604 |
| TC1700001180.mm.1 | ENSMUST00000116165 | Gm14510 | predicted gene 14510                            | 8959312   | 8960403   | TC0X00000098.mm.1 | 0.0  | 0.865757 |
| TC1700001186.mm.1 | NM_001167680       | Rhbf2   | rhomboid 5 homolog 2 (Drosophila)               | 116598165 | 116627019 | TC1100004122.mm.1 | 0.0  | 0.866177 |
| TC1700001189.mm.1 | NM_175446          | Zmat1   | zinc finger, matrin type 1                      | 134971372 | 135009209 | TC0X00003438.mm.1 | 0.0  | 0.866292 |
| TC1700001192.mm.1 | NM_023065          | Ifi30   | interferon gamma inducible protein 30           | 70762773  | 70766663  | TC0800002403.mm.1 | -0.1 | 0.866611 |
| TC1700001194.mm.1 | NM_007878          | Drd4    | dopamine receptor D4                            | 141292006 | 141296464 | TC0700002045.mm.1 | 0.0  | 0.866735 |
| TC1700001197.mm.1 | ENSMUST00000122404 | Gm14150 | predicted gene 14150                            | 151458956 | 151460309 | TC0200002260.mm.1 | 0.0  | 0.866751 |
| TC1700001205.mm.1 | NCBI_Gene:777685:p | Ighv5-2 | immunoglobulin heavy variable 5-2               | 113578504 | 113578990 | TC1200002554.mm.1 | 0.0  | 0.86699  |
| TC1700001209.mm.1 | ENSMUST00000183344 | Rh23-30 | N/A                                             | 87203026  | 87293504  | TC0800001016.mm.1 | 0.0  | 0.867082 |
| TC1700001213.mm.1 | NM_029283          | Fam183b | family with sequence similarity 183, member B   | 58783892  | 58801960  | TC1100002834.mm.1 | 0.0  | 0.867087 |
| TC1700001227.mm.1 | NM_008343          | Igfbp3  | insulin-like growth factor binding protein 3    | 7206086   | 7213923   | TC1100002195.mm.1 | 0.0  | 0.867308 |
| TC1700001230.mm.1 | NM_001080967       | Tmsb15b | thymosin beta 15b2                              | 136954988 | 136976874 | TC0X00003042.mm.1 | 0.0  | 0.867492 |
| TC1700001231.mm.1 | NM_026916          | Nupr1l  | nuclear protein transcriptional regulator 1 lik | 129908540 | 129911281 | TC0500001516.mm.1 | 0.0  | 0.867644 |
| TC1700001232.mm.1 | NM_008099          | Gcsam   | germinal center associated, signaling and motil | 45610380  | 45622867  | TC1600000679.mm.1 | 0.0  | 0.867756 |
| TC1700001237.mm.1 | ENSMUST00000182240 | Gm8907  | predicted gene 8907                             | 50186043  | 50187045  | TC0900002260.mm.1 | 0.0  | 0.868097 |
| TC1700001238.mm.1 | NM_172392          | Zfp759  | zinc finger protein 759                         | 67128228  | 67141787  | TC1300000817.mm.1 | 0.0  | 0.868174 |
| TC1700001261.mm.1 | NM_001134675       | Mup7    | major urinary protein 7                         | 60066469  | 60070475  | TC0400004208.mm.1 | -0.1 | 0.868302 |
| TC1700001262.mm.1 | ENSMUST00000083755 | n-R5s7  | nuclear encoded rRNA 5S 7                       | 68949564  | 68949684  | TC0500002378.mm.1 | -0.1 | 0.868314 |
| TC1700001264.mm.1 | ENSMUST00000097943 | Gm7579  | predicted gene 7579                             | 142211859 | 142212590 | TC0700002070.mm.1 | 0.0  | 0.868554 |
| TC1700001266.mm.1 | ENSMUST00000103943 | Gm23578 | predicted gene, 23578                           | 10468069  | 10468172  | TC0200000095.mm.1 | 0.0  | 0.868581 |
| TC1700001268.mm.1 | NR_037604          | Rdh18-p | retinol dehydrogenase 18, pseudogene            | 127824216 | 127846565 | TC1000003222.mm.1 | 0.0  | 0.868724 |
| TC1700001270.mm.1 | NM_207706          | Elmo2   | engulfment and cell motility 2                  | 165288031 | 165326479 | TC0200005146.mm.1 | 0.0  | 0.868842 |
| TC1700001276.mm.1 | NM_025624          | Pomp    | proteasome maturation protein                   | 147860628 | 147875782 | TC0500001818.mm.1 | 0.0  | 0.868909 |
| TC1700001283.mm.1 | ENSMUST00000177784 | Gm25872 | predicted gene, 25872                           | 7704840   | 7704939   | TC1700000075.mm.1 | 0.1  | 0.868972 |
| TC1700001303.mm.1 | NM_001205009       | Gm2696  | predicted gene 2696                             | 77814682  | 77837251  | TC1000000768.mm.1 | 0.0  | 0.869045 |
| TC1700001304.mm.1 | ENSMUST00000104284 | Gm24791 | predicted gene, 24791                           | 123389801 | 123389931 | TC0100002980.mm.1 | 0.0  | 0.869316 |
| TC1700001309.mm.1 | ENSMUST00000179185 | n-R5s12 | nuclear encoded rRNA 5S 127                     | 123584535 | 123584653 | TC0800003131.mm.1 | -0.1 | 0.869416 |
| TC1700001312.mm.1 | NM_001163675       | Abcc4   | ATP-binding cassette, sub-family C (CFTR/MRP),  | 118482692 | 118706219 | TC1400002714.mm.1 | 0.0  | 0.869538 |
| TC1700001313.mm.1 | NM_001136088       | Sh3bp2  | SH3-domain binding protein 2                    | 34525784  | 34563639  | TC0500000378.mm.1 | 0.0  | 0.869676 |
| TC1700001314.mm.1 | ENSMUST00000177901 | Gm24568 | predicted gene, 24568                           | 21095624  | 21095715  | TC0800001838.mm.1 | 0.0  | 0.869699 |
| TC1700001315.mm.1 | NR_029961          | Mir449a | microRNA 449a                                   | 113037534 | 113037624 | TC1300001281.mm.1 | 0.0  | 0.869777 |
| TC1700001316.mm.1 | NM_001122895       | Nab2    | Ngfi-A binding protein 2                        | 127660918 | 127668568 | TC1000003120.mm.1 | 0.0  | 0.869912 |
| TC1700001322.mm.1 | ENSMUST00000082686 | Gm22303 | predicted gene, 22303                           | 16939994  | 16940115  | TC1200000135.mm.1 | -0.1 | 0.869943 |
| TC1700001330.mm.1 | NM_197943          | Sgsm2   | small G protein signaling modulator 2           | 74849261  | 74897080  | TC1100003204.mm.1 | 0.0  | 0.87026  |
| TC1700001335.mm.1 | ENSMUST00000083941 | Gm25684 | predicted gene, 25684                           | 95442351  | 95442457  | TC0700003751.mm.1 | 0.0  | 0.870361 |
| TC1700001342.mm.1 | NM_146450          | Olfr131 | olfactory receptor 1314                         | 112091761 | 112092699 | TC0200004342.mm.1 | 0.0  | 0.870378 |
| TC1700001345.mm.1 | ENSMUST00000143300 | Gm16356 | predicted gene 16356                            | 175901725 | 175901893 | TC0200002730.mm.1 | 0.0  | 0.870497 |
| TC1700001346.mm.1 | ENSMUST00000175482 | Gm25752 | predicted gene, 25752                           | 79594668  | 79594793  | TC1500001880.mm.1 | 0.0  | 0.87056  |
| TC1700001347.mm.1 | NR_028530          | Snord66 | small nucleolar RNA, C/D box 66                 | 20684239  | 20684313  | TC1600000289.mm.1 | -0.1 | 0.870651 |
| TC1700001365.mm.1 | ENSMUST00000172146 | Gm8893  | predicted gene 8893                             | 103817856 | 103822243 | TC1200002280.mm.1 | -0.1 | 0.870731 |
| TC1700001366.mm.1 | ENSMUST00000122599 | n-R5s17 | nuclear encoded rRNA 5S 175                     | 119297245 | 119297361 | TC0500001322.mm.1 | 0.0  | 0.870756 |
| TC1700001368.mm.1 | NM_001276398       | Ms4a7   | membrane-spanning 4-domains, subfamily A, m     | 11321039  | 11336146  | TC1900001131.mm.1 | 0.0  | 0.870958 |
| TC1700001373.mm.1 | NR_102273          | AA54340 | myc-like oncogene, s-myc protein pseudogene     | 107192793 | 107194061 | TC0900001363.mm.1 | 0.0  | 0.87131  |
| TC1700001379.mm.1 | NR_030460          | Mir688  | microRNA 688                                    | 102671792 | 102671866 | TC1500002300.mm.1 | 0.0  | 0.871873 |
| TC1700001380.mm.1 | NM_026545          | Psmc8   | proteasome (prosome, macropain) 26S subunit,    | 29174187  | 29180701  | TC0700002716.mm.1 | 0.0  | 0.872    |
| TC1700001382.mm.1 | NM_001013758       | Lingo3  | leucine rich repeat and Ig domain containing 3  | 80832801  | 80844039  | TC1000002516.mm.1 | 0.0  | 0.872085 |
| TC1700001385.mm.1 | ENSMUST00000157679 | Gm24504 | predicted gene, 24504                           | 64786329  | 64786428  | TC1800001466.mm.1 | 0.0  | 0.872291 |
| TC1700001390.mm.1 | ENSMUST00000158372 | Gm22766 | predicted gene, 22766                           | 21354354  | 21354452  | TC1200000184.mm.1 | 0.0  | 0.872436 |
| TC1700001393.mm.1 | ENSMUST00000157772 | Gm26311 | predicted gene, 26311                           | 117183335 | 117183411 | TC1000002924.mm.1 | 0.0  | 0.872544 |
| TC1700001395.mm.1 | ENSMUST00000184379 | RP24-19 | N/A                                             | 14756555  | 14756924  | TC0700002390.mm.1 | 0.0  | 0.872547 |
| TC1700001400.mm.1 | ENSMUST00000158671 | Gm23205 | predicted gene, 23205                           | 38297939  | 38298041  | TC1800000397.mm.1 | 0.0  | 0.872596 |
| TC1700001401.mm.1 | ENSMUST00000082770 | n-R5s18 | nuclear encoded rRNA 5S 180                     | 149281118 | 149281223 | TC0500003655.mm.1 | 0.0  | 0.872696 |
| TC1700001420.mm.1 | NM_138674          | Pkhd11l | polycystic kidney and hepatic disease 1-like 1  | 44457553  | 44601170  | TC1500000353.mm.1 | 0.0  | 0.872726 |
| TC1700001422.mm.1 | ENSMUST00000083689 | Gm24762 | predicted gene, 24762                           | 132547104 | 132547207 | TC0400003676.mm.1 | 0.0  | 0.872885 |
| TC1700001436.mm.1 | NM_023785          | Ppbp    | pro-platelet basic protein                      | 90768518  | 90770060  | TC0500000842.mm.1 | -0.1 | 0.873122 |
| TC1700001447.mm.1 | NM_146505          | Olfr148 | olfactory receptor 148                          | 39613544  | 39614568  | TC0900000430.mm.1 | 0.0  | 0.873212 |
| TC1700001449.mm.1 | NM_198627          | Vstm2l  | V-set and transmembrane domain containing 2-l   | 157914653 | 157944719 | TC0200002419.mm.1 | 0.0  | 0.873285 |
| TC1700001450.mm.1 | ENSMUST00000082773 | Gm22507 | predicted gene, 22507                           | 112931424 | 112931583 | TC1000001316.mm.1 | 0.0  | 0.87337  |
| TC1700001451.mm.1 | NM_007614          | Ctnnb1  | catenin (cadherin associated protein), beta 1   | 120929216 | 120960507 | TC0900001612.mm.1 | 0.0  | 0.873373 |
| TC1700001455.mm.1 | ENSMUST00000104616 | Gm24403 | predicted gene, 24403                           | 89048998  | 89049127  | TC0300002332.mm.1 | 0.0  | 0.873468 |

|                   |                    |         |                                                   |           |           |                    |      |          |
|-------------------|--------------------|---------|---------------------------------------------------|-----------|-----------|--------------------|------|----------|
| TC1700001458.mm.1 | NR_035479          | Mir1954 | microRNA 1954                                     | 32652329  | 32652414  | TC0200000589.mm.1  | 0.0  | 0.873524 |
| TC1700001459.mm.1 | ENSMUST00000179028 | Gm21883 | predicted gene, 21883                             | 31573106  | 31574283  | TC0X00002016.mm.1  | 0.0  | 0.873536 |
| TC1700001465.mm.1 | ENSMUST00000122462 | Gm13685 | predicted gene 13685                              | 83538535  | 83538675  | TC0200003855.mm.1  | 0.0  | 0.873612 |
| TC1700001466.mm.1 | NM_019431          | Cacng4  | calcium channel, voltage-dependent, gamma subunit | 107732357 | 107794557 | TC1100003962.mm.1  | 0.0  | 0.873752 |
| TC1700001470.mm.1 | ENSMUST00000083782 | Gm25651 | predicted gene, 25651                             | 169695781 | 169695899 | TC0X00003377.mm.1  | 0.0  | 0.873941 |
| TC1700001471.mm.1 | ENSMUST00000083812 | Gm25005 | predicted gene, 25005                             | 84742162  | 84742317  | TC1800001716.mm.1  | 0.0  | 0.873969 |
| TC1700001478.mm.1 | NM_001205025       | Jagn1   | jagunal homolog 1 (Drosophila)                    | 113442517 | 113448229 | TC0600001250.mm.1  | 0.0  | 0.874591 |
| TC1700001484.mm.1 | ENSMUST00000177652 | Ap3m1-p | adaptor-related protein complex 3, mu 1 subunit   | 82585406  | 82587534  | TC1100000927.mm.1  | 0.0  | 0.874663 |
| TC1700001485.mm.1 | ENSMUST00000102411 | Gm24048 | predicted gene, 24048                             | 135147408 | 135147513 | TC0300001363.mm.1  | 0.0  | 0.87465  |
| TC1700001499.mm.1 | NCBI_Gene:620105:p | Igkv1-3 | immunoglobulin kappa variable 1-35                | 70010949  | 70011673  | TC0600002446.mm.1  | 0.0  | 0.87511  |
| TC1700001500.mm.1 | NM_178599          | Comm8   | COMM domain containing 8                          | 72157000  | 72168183  | TC0500002567.mm.1  | 0.0  | 0.875132 |
| TC1700001502.mm.1 | NM_013739          | Dok3    | docking protein 3                                 | 55523235  | 55528556  | TC1300002062.mm.1  | 0.0  | 0.875198 |
| TC1700001507.mm.1 | NM_001114679       | 9930111 | RIKEN cDNA 9930111J21 gene 1                      | 48946150  | 48979398  | TC11000004292.mm.1 | -0.1 | 0.875354 |
| TC1700001512.mm.1 | NM_025498          | Psenen  | presenilin enhancer 2 homolog (C. elegans)        | 30561865  | 30563186  | TC0700002766.mm.1  | 0.1  | 0.875357 |
| TC1700001524.mm.1 | ENSMUST00000184199 | ZNF1-A  | ZNF1 antisense RNA 1 conserved region 2           | 74764798  | 74764890  | TC0100000643.mm.1  | 0.0  | 0.875538 |
| TC1700001552.mm.1 | NM_172709          | Otop1   | otopetritin 1                                     | 38275972  | 38304217  | TC0500000436.mm.1  | 0.0  | 0.875773 |
| TC1700001553.mm.1 | NM_015790          | Icosl   | icos ligand                                       | 78079525  | 78079525  | TC1000000778.mm.1  | 0.1  | 0.876104 |
| TC1700001566.mm.1 | ENSMUST00000169859 | Gm17542 | predicted gene, 17542                             | 58713606  | 58718210  | TC1000002208.mm.1  | 0.0  | 0.876124 |
| TC1700001570.mm.1 | BC117508           | Sh2d1b1 | SH2 domain protein 1B1                            | 170277318 | 170285662 | TC0100001568.mm.1  | 0.0  | 0.876247 |
| TC1700001572.mm.1 | NM_011600          | Tle4    | transducin-like enhancer of split 4, homolog of   | 14448072  | 14598051  | TC1900001196.mm.1  | 0.0  | 0.87631  |
| TC1700001593.mm.1 | NM_007549          | Blk     | B lymphoid kinase                                 | 63372836  | 63417187  | TC1400002219.mm.1  | -0.1 | 0.876513 |
| TC1700001595.mm.1 | NM_019400          | Rabep1  | rabaptin, RAB GTPase binding effector protein 1   | 70844763  | 70943105  | TC1100000967.mm.1  | 0.0  | 0.876601 |
| TC1700001599.mm.1 | NM_001242941       | Gm3317  | predicted gene 3317                               | 5163642   | 5170292   | TC1400000040.mm.1  | 0.0  | 0.876625 |
| TC1700001602.mm.1 | ENSMUST00000104300 | Gm25276 | predicted gene, 25276                             | 13531428  | 13531551  | TC1600001230.mm.1  | 0.0  | 0.876827 |
| TC1700001603.mm.1 | ENSMUST00000178153 | Gm23215 | predicted gene, 23215                             | 3249584   | 3249704   | TC1600000003.mm.1  | 0.1  | 0.877196 |
| TC1700001604.mm.1 | NM_009654          | Alb     | albumin                                           | 90460889  | 90476603  | TC0500000834.mm.1  | 0.1  | 0.877239 |
| TC1700001606.mm.1 | NM_009266          | Seps2   | selenophosphate synthetase 2                      | 127271879 | 127274059 | TC0700004321.mm.1  | 0.0  | 0.877401 |
| TC1700001614.mm.1 | ENSMUST00000182385 | Gm26927 | predicted gene, 26927                             | 84339149  | 84340113  | TC1300002375.mm.1  | 0.0  | 0.877673 |
| TC1700001622.mm.1 | ENSMUST00000175329 | Gm25952 | predicted gene, 25952                             | 65989045  | 65989118  | TC0500000633.mm.1  | 0.0  | 0.877841 |
| TC1700001625.mm.1 | NM_007893          | E4f1    | E4F transcription factor 1                        | 24443779  | 24455370  | TC1700001628.mm.1  | 0.0  | 0.878044 |
| TC1700001628.mm.1 | XR_105479          | 3110053 | RIKEN cDNA 3110053B16 gene                        | 20874095  | 20921275  | TC1200001482.mm.1  | 0.0  | 0.878127 |
| TC1700001631.mm.1 | ENSMUST00000175312 | Gm24815 | predicted gene, 24815                             | 7741553   | 7741622   | TC1200001389.mm.1  | 0.0  | 0.878222 |
| TC1700001634.mm.1 | ENSMUST00000175341 | Gm24322 | predicted gene, 24322                             | 90796186  | 90796255  | TC0500002732.mm.1  | 0.0  | 0.878357 |
| TC1700001637.mm.1 | NM_028127          | Frmf6   | FERM domain containing 6                          | 70825514  | 70902234  | TC1200000596.mm.1  | 0.0  | 0.878463 |
| TC1700001640.mm.1 | NM_172150          | Ift52   | intraflagellar transport 52                       | 163017354 | 163046141 | TC0200002477.mm.1  | 0.0  | 0.878511 |
| TC1700001641.mm.1 | ENSMUST00000157826 | Gm26368 | predicted gene, 26368                             | 167364180 | 167364297 | TC0X00003362.mm.1  | 0.0  | 0.878659 |
| TC1700001644.mm.1 | ENSMUST00000177620 | Gm22908 | predicted gene, 22908                             | 22040913  | 22041022  | TC1200000189.mm.1  | 0.0  | 0.878677 |
| TC1700001646.mm.1 | NM_146173          | Tspan33 | tetraspanin 33                                    | 29694222  | 29718559  | TC0600000240.mm.1  | 0.0  | 0.87869  |
| TC1700001648.mm.1 | ENSMUST00000177829 | Gm11273 | predicted gene 11273                              | 21500953  | 21501430  | TC1300001545.mm.1  | 0.0  | 0.878704 |
| TC1700001652.mm.1 | NM_053244          | Kiss1r  | KISS1 receptor                                    | 79916971  | 79922273  | TC1000000828.mm.1  | 0.0  | 0.878716 |
| TC1700001655.mm.1 | ENSMUST00000182463 | Gm3671  | predicted gene 3671                               | 75693653  | 75694659  | TC0900002682.mm.1  | 0.0  | 0.879003 |
| TC1700001659.mm.1 | NM_175276          | Fhod3   | formin homology 2 domain containing 3             | 24708623  | 25133507  | TC1800000201.mm.1  | 0.0  | 0.879021 |
| TC1700001666.mm.1 | NM_026485          | Trabd   | TraB domain containing                            | 89075124  | 89087077  | TC1500000860.mm.1  | 0.0  | 0.879669 |
| TC1700001671.mm.1 | BC060207           | Bmyc    | brain expressed myelocytomatosis oncogene         | 25706739  | 25707721  | TC0200000432.mm.1  | 0.0  | 0.879679 |
| TC1700001674.mm.1 | ENSMUST00000178947 | Gm23089 | predicted gene, 23089                             | 59718588  | 59718681  | TC0700003286.mm.1  | 0.0  | 0.879959 |
| TC1700001675.mm.1 | ENSMUST00000178062 | Gm24711 | predicted gene, 24711                             | 59721125  | 59721218  | TC0700003287.mm.1  | 0.0  | 0.879959 |
| TC1700001677.mm.1 | ENSMUST00000179963 | Gm26188 | predicted gene, 26188                             | 59723644  | 59723737  | TC0700003288.mm.1  | 0.0  | 0.879959 |
| TC1700001690.mm.1 | ENSMUST00000078246 | Gm10108 | predicted pseudogene 10108                        | 13121449  | 13121766  | TC0500001963.mm.1  | 0.0  | 0.880238 |
| TC1700001694.mm.1 | NR_045392          | Gm10731 | FUN14 domain containing 2 pseudogene              | 40853476  | 40855285  | TC0300001903.mm.1  | 0.0  | 0.880291 |
| TC1700001699.mm.1 | ENSMUST00000174687 | Cd9-ps  | Cd9 antigen, pseudogene                           | 41682658  | 41683307  | TC0700002912.mm.1  | 0.0  | 0.880376 |
| TC1700001701.mm.1 | XM_001477786       | Gm7137  | predicted gene 7137                               | 77787490  | 77788200  | TC1000002431.mm.1  | 0.0  | 0.880431 |
| TC1700001713.mm.1 | ENSMUST00000175036 | Gm26194 | predicted gene, 26194                             | 39976301  | 39976371  | TC0X00002099.mm.1  | 0.0  | 0.880442 |
| TC1700001716.mm.1 | ENSMUST00000103855 | Gm22918 | predicted gene, 22918                             | 100139501 | 100139610 | TC1000001219.mm.1  | 0.0  | 0.880674 |
| TC1700001718.mm.1 | ENSMUST00000103846 | Gm25287 | predicted gene, 25287                             | 100144254 | 100144363 | TC1000001220.mm.1  | 0.0  | 0.880674 |
| TC1700001743.mm.1 | NM_001195634       | Defa2   | defensin, alpha, 2                                | 21378517  | 21379495  | TC0800000234.mm.1  | 0.0  | 0.880968 |
| TC1700001755.mm.1 | NM_139142          | Slc6a20 | solute carrier family 6 (neurotransmitter trans   | 123636122 | 123678885 | TC0900000307.mm.1  | 0.0  | 0.881274 |
| TC1700001775.mm.1 | ENSMUST00000180091 | n-R5s93 | nuclear encoded rRNA 5S 93                        | 5069259   | 5069377   | TC0800001641.mm.1  | 0.0  | 0.881326 |
| TC1700001779.mm.1 | NM_027759          | Fsfp1   | fibrous sheath-interacting protein 1              | 118204888 | 118256966 | TC0200004406.mm.1  | 0.0  | 0.881661 |
| TC1700001781.mm.1 | NM_008878          | Serpinf | serine (or cysteine) peptidase inhibitor, clade   | 75431732  | 75439591  | TC1100003224.mm.1  | 0.0  | 0.881687 |
| TC1700001786.mm.1 | ENSMUST00000104047 | Gm25095 | predicted gene, 25095                             | 188622923 | 188623053 | TC0100003775.mm.1  | 0.0  | 0.881823 |
| TC1700001802.mm.1 | ENSMUST00000118945 | Gm15172 | predicted gene 15172                              | 157377939 | 157378984 | TC0X00003248.mm.1  | 0.0  | 0.881911 |
| TC1700001821.mm.1 | NR_003518          | Pisd-ps | phosphatidylserine decarboxylase, pseudogene      | 17987     | 59690     | TCUn_JH5843040000  | 0.0  | 0.881947 |
| TC1700001824.mm.1 | NM_030199          | Zfp623  | zinc finger protein 623                           | 75940952  | 75949402  | TC1500000567.mm.1  | 0.0  | 0.881981 |
| TC1700001834.mm.1 | ENSMUST00000122803 | Gm22451 | predicted gene, 22451                             | 72737831  | 72737981  | TC0300002150.mm.1  | 0.0  | 0.881982 |
| TC1700001838.mm.1 | ENSMUST00000119246 | Gm12286 | predicted gene, 12286                             | 63312310  | 63313311  | TC1100002957.mm.1  | 0.0  | 0.882187 |
| TC1700001839.mm.1 | ENSMUST00000158075 | Gm25554 | predicted gene, 25554                             | 104289860 | 104289972 | TC0200001555.mm.1  | 0.0  | 0.882244 |
| TC1700001846.mm.1 | ENSMUST00000116769 | Gm26475 | predicted gene, 26475                             | 128522689 | 128522809 | TC0X00002958.mm.1  | 0.1  | 0.882268 |
| TC1700001849.mm.1 | ENSMUST00000122433 | Gm14148 | predicted gene 14148                              | 151374008 | 151375047 | TC0200002259.mm.1  | 0.0  | 0.882276 |
| TC1700001850.mm.1 | NM_026752          | Zfyve21 | zinc finger, FYVE domain containing 21            | 111814170 | 111828388 | TC1200001248.mm.1  | 0.0  | 0.882283 |
| TC1700001860.mm.1 | NM_028964          | Snx29   | sorting nexin 29                                  | 11322904  | 11755473  | TC1600000138.mm.1  | 0.0  | 0.882412 |
| TC1700001877.mm.1 | OTTMUST00000112462 | RP23-39 | ---                                               | 84742169  | 84744326  | TC0200003879.mm.1  | 0.0  | 0.882548 |
| TC1700001883.mm.1 | ENSMUST00000179446 | Gm23860 | predicted gene, 23860                             | 7820916   | 7821047   | TC0400000048.mm.1  | 0.0  | 0.882773 |
| TC1700001887.mm.1 | ENSMUST00000083784 | Gm25650 | predicted gene, 25650                             | 46838346  | 46838507  | TC1000002117.mm.1  | 0.0  | 0.882836 |
| TC1700001894.mm.1 | ENSMUST00000183681 | AC11090 | N/A                                               | 80026418  | 80026513  | TC0700003575.mm.1  | 0.0  | 0.88298  |
| TC1700001904.mm.1 | NR_030577          | Mir574  | microRNA 574                                      | 64970318  | 64970395  | TC0500000603.mm.1  | 0.0  | 0.883208 |
| TC1700001915.mm.1 | OTTMUST00000060184 | RP24-54 | ---                                               | 124916863 | 124925844 | TC0600001435.mm.1  | 0.0  | 0.883228 |
| TC1700001921.mm.1 | NM_133678          | Sac3d1  | SAC3 domain containing 1                          | 6116004   | 6118650   | TC1900001002.mm.1  | 0.0  | 0.883665 |
| TC1700001924.mm.1 | NM_009457          | Uba1    | ubiquitin-like modifier activating enzyme 1       | 20658302  | 20683179  | TC0X00000212.mm.1  | 0.0  | 0.883858 |

|                   |                    |            |                                                 |           |           |                   |      |          |
|-------------------|--------------------|------------|-------------------------------------------------|-----------|-----------|-------------------|------|----------|
| TC1700001925.mm.1 | NM_029780          | Raf1       | v-raf-leukemia viral oncogene 1                 | 115618067 | 115676635 | TC0600002955.mm.1 | 0.0  | 0.883942 |
| TC1700001926.mm.1 | NM_145229          | AY07488    | cDNA sequence AY074887                          | 54950230  | 54950998  | TC0900002326.mm.1 | 0.0  | 0.883975 |
| TC1700001934.mm.1 | NR_037225          | Mir3065    | microRNA 3065                                   | 120014767 | 120014853 | TC1100002017.mm.1 | 0.0  | 0.884316 |
| TC1700001935.mm.1 | ENSMUST00000158074 | Gm22328    | predicted gene, 22328                           | 99484591  | 99484702  | TC0600002837.mm.1 | 0.0  | 0.884491 |
| TC1700001938.mm.1 | ENSMUST00000104440 | Gm23768    | predicted gene, 23768                           | 132553714 | 132553844 | TC0X00002976.mm.1 | 0.0  | 0.884505 |
| TC1700001949.mm.1 | ENSMUST00000083657 | Gm22753    | predicted gene, 22753                           | 23479561  | 23479667  | TC1100002363.mm.1 | 0.0  | 0.884691 |
| TC1700001951.mm.1 | ENSMUST00000158016 | Gm26483    | predicted gene, 26483                           | 12666095  | 12666198  | TC0800000109.mm.1 | 0.0  | 0.884715 |
| TC1700001969.mm.1 | NM_029809          | 2310014    | RIKEN cDNA 2310014L17 gene                      | 12927416  | 12931072  | TC0700000152.mm.1 | 0.0  | 0.884737 |
| TC1700001970.mm.1 | ENSMUST00000180002 | Gm21872    | predicted gene, 21872                           | 35569461  | 35570165  | TC0Y00000114.mm.1 | 0.0  | 0.884919 |
| TC1700001976.mm.1 | ENSMUST00000181461 | Gm2383     | predicted gene 2383                             | 12565577  | 12566383  | TC0100000061.mm.1 | 0.0  | 0.88531  |
| TC1700001977.mm.1 | NM_001080943       | Zdhhc22    | zinc finger, DHHC-type containing 22            | 86983381  | 86988676  | TC1200002113.mm.1 | 0.0  | 0.885323 |
| TC1700001984.mm.1 | NM_146377          | Olfr127    | olfactory receptor 127                          | 37903522  | 37904616  | TC1700000789.mm.1 | 0.0  | 0.885339 |
| TC1700001988.mm.1 | ENSMUST00000158721 | Gm22663    | predicted gene, 22663                           | 51740241  | 51740342  | TC1400000721.mm.1 | 0.0  | 0.885567 |
| TC1700001996.mm.1 | NM_011388          | Slc10a2    | solute carrier family 10, member 2              | 5085623   | 5105232   | TC0800001643.mm.1 | 0.0  | 0.885796 |
| TC1700001998.mm.1 | ENSMUST00000104424 | Gm25498    | predicted gene, 25498                           | 33207152  | 33207280  | TC1400000356.mm.1 | 0.0  | 0.885848 |
| TC1700002013.mm.1 | ENSMUST00000158647 | Gm24549    | predicted gene, 24549                           | 54565998  | 54566136  | TC0200003554.mm.1 | 0.0  | 0.886034 |
| TC1700002041.mm.1 | NM_001126322       | NM_0011595 | predicted gene 11595                            | 99771714  | 99772913  | TC1100003735.mm.1 | 0.0  | 0.886166 |
| TC1700002042.mm.1 | NM_019770          | Tmed2      | transmembrane emp24 domain trafficking prote    | 124540695 | 124550506 | TC0500001447.mm.1 | 0.0  | 0.886206 |
| TC1700002062.mm.1 | ENSMUST00000094175 | Gm10291    | predicted pseudogene 10291                      | 78917258  | 78918259  | TC0300000616.mm.1 | 0.0  | 0.886378 |
| TC1700002066.mm.1 | XR_141070          | Gm21552    | predicted gene, 21552                           | 103310555 | 103332315 | TC1100001710.mm.1 | 0.0  | 0.886432 |
| TC1700002071.mm.1 | ENSMUST00000157416 | Gm25261    | predicted gene, 25261                           | 131239277 | 131239410 | TC0400001563.mm.1 | 0.0  | 0.886477 |
| TC1700002074.mm.1 | NM_001024706       | Gm5458     | predicted gene 5458                             | 19594138  | 19602587  | TC1400001519.mm.1 | 0.0  | 0.886703 |
| TC1700002076.mm.1 | NM_134148          | Carns1     | carnosine synthase 1                            | 4164324   | 4175479   | TC1900000906.mm.1 | 0.0  | 0.886774 |
| TC1700002078.mm.1 | ENSMUST00000082617 | Gm24624    | predicted gene, 24624                           | 116345732 | 116345895 | TC0X00001157.mm.1 | 0.0  | 0.886867 |
| TC1700002079.mm.1 | NM_010346          | Grb7       | growth factor receptor bound protein 7          | 98446394  | 98455373  | TC1100001570.mm.1 | 0.0  | 0.88693  |
| TC1700002098.mm.1 | NM_001039698       | Rhox4g     | reproductive homeobox 4G                        | 37646501  | 37651327  | TC0X00002069.mm.1 | 0.0  | 0.887024 |
| TC1700002101.mm.1 | NR_105769          | Mir6351    | microRNA mir-6351 (Mir6351), microRNA.          | 0         | 0         | TSUmapped0000011  | 0.0  | 0.887073 |
| TC1700002145.mm.1 | ENSMUST00000177157 | Gm5873     | predicted gene 5873                             | 6735427   | 6736492   | TC0600001824.mm.1 | 0.0  | 0.8872   |
| TC1700002151.mm.1 | NR_033633          | Gm8709     | glyceraldehyde-3-phosphate dehydrogenase pse    | 26673446  | 26674651  | TC1000001917.mm.1 | 0.0  | 0.887237 |
| TC1700002153.mm.1 | NM_025994          | Efh2       | EF hand domain containing 2                     | 141858142 | 141874952 | TC0400003894.mm.1 | 0.0  | 0.887419 |
| TC1700002165.mm.1 | NM_024220          | Ndufc2     | NADH dehydrogenase (ubiquinone) 1, subcompli    | 97400003  | 97407802  | TC0700001349.mm.1 | 0.0  | 0.887614 |
| TC1700002167.mm.1 | NM_008943          | Psen1      | presenilin 1                                    | 83688172  | 83735199  | TC1200000792.mm.1 | 0.0  | 0.887903 |
| TC1700002169.mm.1 | NM_001205239       | Parp6      | poly (ADP-ribose) polymerase family, member 6   | 59617284  | 59650290  | TC0900000750.mm.1 | 0.0  | 0.888162 |
| TC1700002170.mm.1 | NM_001199995       | Mup12      | major urinary protein 12                        | 60737381  | 60741326  | TC0400004212.mm.1 | -0.1 | 0.888374 |
| TC1700002171.mm.1 | NM_207000          | H2afy2     | H2A histone family, member Y2                   | 61738647  | 61784147  | TC1000002248.mm.1 | 0.0  | 0.888389 |
| TC1700002175.mm.1 | ENSMUST00000117712 | Gm9062     | predicted gene 9062                             | 97826379  | 97827105  | TC0X00000925.mm.1 | 0.0  | 0.88842  |
| TC1700002176.mm.1 | NM_018816          | Apom       | apolipoprotein M                                | 35128997  | 35132050  | TC1700001949.mm.1 | 0.0  | 0.888514 |
| TC1700002179.mm.1 | NM_007953          | Esrra      | estrogen related receptor, alpha                | 6910977   | 6921813   | TC1900001020.mm.1 | 0.0  | 0.888696 |
| TC1700002181.mm.1 | NM_001025351       | Defb46     | defensin beta 46                                | 19239915  | 19242143  | TC0800000183.mm.1 | 0.0  | 0.888756 |
| TC1700002183.mm.1 | ENSMUST00000104339 | Gm25506    | predicted gene, 25506                           | 85050207  | 85050276  | TC0800000978.mm.1 | 0.0  | 0.888787 |
| TC1700002184.mm.1 | ENSMUST00000117696 | Gm12389    | predicted gene 12389                            | 40116816  | 40117233  | TC0400002433.mm.1 | 0.0  | 0.888911 |
| TC1700002185.mm.1 | NM_019466          | Rcan1      | regulator of calcineurin 1                      | 92391951  | 92466169  | TC1600002094.mm.1 | 0.0  | 0.888913 |
| TC1700002186.mm.1 | NM_010484          | Slc6a4     | solute carrier family 6 (neurotransmitter trans | 76998597  | 77032343  | TC1100001111.mm.1 | 0.0  | 0.889062 |
| TC1700002187.mm.1 | NM_183278          | Fam25c     | family with sequence similarity 25, member C    | 34351881  | 34355433  | TC1400001724.mm.1 | 0.0  | 0.889113 |
| TC1700002190.mm.1 | NM_177001          | 9130023    | RIKEN cDNA 9130023H24 gene                      | 128234451 | 128238031 | TC0700004360.mm.1 | 0.0  | 0.889163 |
| TC1700002191.mm.1 | NR_003630          | Gm6498     | glyceraldehyde-3-phosphate dehydrogenase pse    | 48198716  | 48228413  | TC1400000528.mm.1 | 0.0  | 0.889184 |
| TC1700002201.mm.1 | ENSMUST00000082675 | Gm25635    | predicted gene, 25635                           | 9852019   | 9852149   | TC1000001740.mm.1 | 0.0  | 0.889216 |
| TC1700002207.mm.1 | NM_026239          | Tmem35     | transmembrane protein 35                        | 134295225 | 134305969 | TC0X00001275.mm.1 | 0.0  | 0.889271 |
| TC1700002208.mm.1 | NM_026246          | Mirpl49    | mitochondrial ribosomal protein L49             | 6053630   | 6057751   | TC1900000999.mm.1 | 0.0  | 0.889405 |
| TC1700002209.mm.1 | NM_008454          | Klk1b16    | kallikrein 1-related peptidase b16              | 44136767  | 44141607  | TC0700000791.mm.1 | 0.0  | 0.889744 |
| TC1700002215.mm.1 | ENSMUST00000069529 | Gm7936     | predicted pseudogene 7936                       | 30495001  | 30495375  | TC1800001104.mm.1 | 0.0  | 0.890075 |
| TC1700002282.mm.1 | NM_011109          | Pla2g2d    | phospholipase A2, group IID                     | 138775735 | 138782143 | TC0400001733.mm.1 | 0.0  | 0.89023  |
| TC1700002284.mm.1 | ENSMUST00000179278 | Gm23767    | predicted gene, 23767                           | 59708469  | 59708562  | TC0700003282.mm.1 | 0.0  | 0.890281 |
| TC1700002287.mm.1 | ENSMUST00000096117 | Ppp1r2-    | protein phosphatase 1, regulatory (inhibitor) s | 90905699  | 90906507  | TC0600001080.mm.1 | 0.0  | 0.890546 |
| TC1700002288.mm.1 | NM_001033227       | Slc5a10    | solute carrier family 5 (sodium/glucose cotrans | 61672781  | 61720826  | TC1100002919.mm.1 | 0.0  | 0.890753 |
| TC1700002293.mm.1 | NM_001200004       | Mup15      | major urinary protein 15                        | 61224307  | 61674136  | TC0400002769.mm.1 | -0.1 | 0.890905 |
| TC1700002298.mm.1 | ENSMUST00000104099 | Gm25763    | predicted gene, 25763                           | 18613981  | 18614109  | TC0800001794.mm.1 | 0.0  | 0.890964 |
| TC1700002303.mm.1 | NM_001162944       | Gm10318    | predicted gene 10318                            | 77852859  | 77853788  | TC1000000769.mm.1 | 0.0  | 0.890981 |
| TC1700002305.mm.1 | NM_173757          | Mrps27     | mitochondrial ribosomal protein S27             | 99344786  | 99415561  | TC1300001131.mm.1 | 0.0  | 0.891118 |
| TC1700002306.mm.1 | ENSMUST00000158772 | Gm23026    | predicted gene, 23026                           | 37463746  | 37463851  | TC1900000533.mm.1 | 0.0  | 0.89131  |
| TC1700002308.mm.1 | ENSMUST00000157506 | Gm22897    | predicted gene, 22897                           | 4985111   | 4985237   | TC0500001903.mm.1 | 0.0  | 0.89165  |
| TC1700002311.mm.1 | ENSMUST00000178071 | Gm25020    | predicted gene, 25020                           | 17206021  | 17206127  | TC1300000117.mm.1 | 0.0  | 0.89168  |
| TC1700002313.mm.1 | ENSMUST00000074576 | Gm12338    | predicted gene 12338                            | 75599641  | 75600027  | TC1100003229.mm.1 | 0.0  | 0.892    |
| TC1700002314.mm.1 | ENSMUST00000157724 | Gm22335    | predicted gene, 22335                           | 117027211 | 117027309 | TC0400001275.mm.1 | 0.0  | 0.892035 |
| TC1700002315.mm.1 | NM_145579          | Mypop      | Myb-related transcription factor, partner of pr | 18991245  | 19001766  | TC0700000280.mm.1 | 0.0  | 0.892196 |
| TC1700002316.mm.1 | BC125375           | Caprin2    | caprin family member 2                          | 148842492 | 148896237 | TC0600003469.mm.1 | 0.0  | 0.892223 |
| TC1700002318.mm.1 | NM_001099276       | Pik3c2b    | phosphoinositide-3-kinase, class 2, beta polype | 133045667 | 133108688 | TC0100001201.mm.1 | 0.0  | 0.892507 |
| TC1700002320.mm.1 | ENSMUST00000184817 | RP24-12    | N/A                                             | 81016088  | 81016958  | TC0900002747.mm.1 | 0.0  | 0.892524 |
| TC1700002321.mm.1 | XM_003689051       | Gm21184    | predicted gene, 21184                           | 34486834  | 34487517  | TC0Y00000107.mm.1 | 0.0  | 0.892798 |
| TC1700002324.mm.1 | XM_003689018       | Gm21247    | predicted gene, 21247                           | 46757399  | 46758082  | TC0Y00000142.mm.1 | 0.0  | 0.892798 |
| TC1700002332.mm.1 | XM_003689021       | Gm21281    | predicted gene, 21281                           | 48669776  | 48670459  | TC0Y00000351.mm.1 | 0.0  | 0.892798 |
| TC1700002333.mm.1 | XM_003689076       | Gm21573    | predicted gene, 21573                           | 61460032  | 61460715  | TC0Y00000411.mm.1 | 0.0  | 0.892798 |
| TC1700002337.mm.1 | ENSMUST00000082743 | Gm22809    | predicted gene, 22809                           | 128061705 | 128061860 | TC0700004354.mm.1 | 0.0  | 0.892856 |
| TC1700002339.mm.1 | ENSMUST00000184281 | mmu-mir    | mmu-mir-6240                                    | 114851948 | 114852064 | TC0500001237.mm.1 | 0.0  | 0.89289  |
| TC1700002343.mm.1 | XM_001475804       | Gm16427    | predicted gene 16427                            | 93481827  | 93493684  | TC0500002777.mm.1 | 0.0  | 0.892912 |
| TC1700002344.mm.1 | ENSMUST00000184184 | ST7-OT4    | ST7 overlapping transcript 4 conserved region 3 | 17696894  | 17697149  | TC0600000138.mm.1 | 0.0  | 0.892943 |
| TC1700002347.mm.1 | ENSMUST00000178099 | Gm26057    | predicted gene, 26057                           | 7374193   | 7374357   | TC1700001401.mm.1 | 0.0  | 0.893176 |
| TC1700002348.mm.1 | ENSMUST00000178456 | Gm25355    | predicted gene, 25355                           | 8235582   | 8235682   | TC0400000050.mm.1 | 0.0  | 0.893179 |

|                   |                    |          |                                                 |           |           |                   |      |          |
|-------------------|--------------------|----------|-------------------------------------------------|-----------|-----------|-------------------|------|----------|
| TC1700002351.mm.1 | ENSMUST00000179866 | Gm23064  | predicted gene, 23064                           | 103471859 | 103471959 | TC0400001074.mm.1 | 0.0  | 0.893179 |
| TC1700002352.mm.1 | ENSMUST00000104489 | Gm24468  | predicted gene, 24468                           | 101186764 | 101186867 | TC0400001027.mm.1 | 0.0  | 0.893294 |
| TC1700002354.mm.1 | ENSMUST00000117187 | Gm6181   | predicted pseudogene 6181                       | 52755465  | 52755728  | TC0700000918.mm.1 | 0.0  | 0.89344  |
| TC1700002356.mm.1 | NM_011192          | Psme3    | proteasome (prosome, macropain) 28 subunit,     | 101316213 | 101323537 | TC1100001649.mm.1 | 0.0  | 0.8937   |
| TC1700002357.mm.1 | NM_029557          | Tsen54   | tRNA splicing endonuclease 54 homolog (S. cere  | 115814710 | 115823102 | TC1100001907.mm.1 | 0.0  | 0.893921 |
| TC1700002362.mm.1 | NM_031252          | Il23a    | interleukin 23, alpha subunit p19               | 128296139 | 128298084 | TC1000003135.mm.1 | 0.0  | 0.894027 |
| TC1700002367.mm.1 | ENSMUST00000175108 | Gm24327  | predicted gene, 24327                           | 168064820 | 168064897 | TC0200005207.mm.1 | 0.0  | 0.894083 |
| TC1700002400.mm.1 | ENSMUST00000157891 | Gm23044  | predicted gene, 23044                           | 12793875  | 12793974  | TC1000001759.mm.1 | 0.0  | 0.894213 |
| TC1700002411.mm.1 | NM_133226          | Pdzd3    | PDZ domain containing 3                         | 44247312  | 44251464  | TC0900002151.mm.1 | 0.0  | 0.894897 |
| TC1700002413.mm.1 | NM_025337          | Akr7a5   | aldo-keto reductase family 7, member A5 (aflato | 139310744 | 139318786 | TC0400001743.mm.1 | 0.0  | 0.895019 |
| TC1700002416.mm.1 | NM_172945          | Ankrd13  | ankyrin repeat domain 13b                       | 77470485  | 77489678  | TC1100003265.mm.1 | 0.0  | 0.895109 |
| TC1700002418.mm.1 | ENSMUST00000183826 | mmu-mir  | mmu-mir-6351                                    | 73855477  | 73855575  | TC0100002574.mm.1 | 0.0  | 0.89531  |
| TC1700002454.mm.1 | NM_024461          | 1810037  | RIKEN cDNA 181003717 gene                       | 122924362 | 122926194 | TC0300001252.mm.1 | 0.0  | 0.895362 |
| TC1700002482.mm.1 | ENSMUST00000117257 | Gm6088   | predicted gene 6088                             | 140797396 | 140799934 | TC0X00001388.mm.1 | 0.0  | 0.895398 |
| TC1700002488.mm.1 | ENSMUST00000103788 | Mir297c  | microRNA 297c                                   | 10509016  | 10509113  | TC0200000184.mm.1 | 0.0  | 0.895461 |
| TC1700002490.mm.1 | ENSMUST00000083377 | n-R5s15  | nuclear encoded rRNA 5S 156                     | 99497718  | 99497822  | TC0700001388.mm.1 | 0.1  | 0.895906 |
| TC1700002498.mm.1 | NM_177716          | Al83600  | expressed sequence Al836003                     | 98167806  | 98170134  | TC0100000971.mm.1 | 0.0  | 0.895986 |
| TC1700002526.mm.1 | ENSMUST00000158377 | Gm23855  | predicted gene, 23855                           | 62384918  | 62385052  | TC1300000754.mm.1 | 0.0  | 0.896048 |
| TC1700002534.mm.1 | ENSMUST00000116866 | Gm22197  | predicted gene, 22197                           | 125064015 | 125064072 | TC0800001556.mm.1 | 0.0  | 0.896106 |
| TC1700002541.mm.1 | NM_177135          | D830030  | RIKEN cDNA D830030K20 gene                      | 3846245   | 3856085   | TC1400000014.mm.1 | 0.0  | 0.896968 |
| TC1700002542.mm.1 | ENSMUST00000116852 | Gm23551  | predicted gene, 23551                           | 3051289   | 3051409   | TC0600001779.mm.1 | -0.1 | 0.897152 |
| TC1700002546.mm.1 | NM_080554          | Psmf5    | proteasome (prosome, macropain) 26S subunit,    | 34852088  | 34870962  | TC0200003353.mm.1 | 0.0  | 0.897191 |
| TC1700002557.mm.1 | NM_023524          | Tfpt     | TCF3 (E2A) fusion partner                       | 3620324   | 3629929   | TC0700002132.mm.1 | 0.0  | 0.897241 |
| TC1700002564.mm.1 | ENSMUST00000116709 | Gm26250  | predicted gene, 26250                           | 13266985  | 13267050  | TC0400002223.mm.1 | 0.0  | 0.897251 |
| TC1700002571.mm.1 | ENSMUST00000104353 | Gm22021  | predicted gene, 22021                           | 104591094 | 104591200 | TC1400001194.mm.1 | 0.0  | 0.897864 |
| TC1700002573.mm.1 | ENSMUST00000103851 | Gm25537  | predicted gene, 25537                           | 100861793 | 100861901 | TC0100000988.mm.1 | 0.0  | 0.897942 |
| TC1700002583.mm.1 | NM_001081341       | Scaper   | S phase cyclin A-associated protein in the ER   | 55549883  | 55938115  | TC0900002338.mm.1 | 0.0  | 0.897943 |
| TC1700002594.mm.1 | NM_010473          | Hrc      | histidine rich calcium binding protein          | 45335269  | 45338973  | TC0700000840.mm.1 | 0.0  | 0.897974 |
| TC1700002595.mm.1 | XR_140758          | Gm10091  | predicted gene 10091                            | 140615695 | 140618343 | TC0500001696.mm.1 | 0.0  | 0.897978 |
| TC1700002614.mm.1 | ENSMUST00000102382 | Gm24714  | predicted gene, 24714                           | 16645438  | 16645538  | TC1100002243.mm.1 | 0.0  | 0.898074 |
| TC1700002629.mm.1 | NM_001167828       | Trim30d  | tripartite motif-containing 30D                 | 104470014 | 104507849 | TC0700003946.mm.1 | 0.0  | 0.898122 |
| TC1700002637.mm.1 | ENSMUST00000083254 | Gm25140  | predicted gene, 25140                           | 37980087  | 37980226  | TC1600000540.mm.1 | 0.0  | 0.8983   |
| TC1700002647.mm.1 | NR_035476          | Mir1951  | microRNA 1951                                   | 115638725 | 115638813 | TC0200001701.mm.1 | 0.0  | 0.898463 |
| TC1700002648.mm.1 | ENSMUST00000104414 | Gm22672  | predicted gene, 22672                           | 24884173  | 24884306  | TC1600000362.mm.1 | 0.0  | 0.898594 |
| TC1700002649.mm.1 | NR_037190          | Gm9855   | thymine DNA glycosylase pseudogene              | 42052558  | 42055453  | TC1000002059.mm.1 | 0.0  | 0.898609 |
| TC1700002662.mm.1 | ENSMUST00000103962 | Gm24581  | predicted gene, 24581                           | 135131514 | 135131646 | TC0700004445.mm.1 | 0.0  | 0.898663 |
| TC1700002665.mm.1 | ENSMUST00000158688 | Gm23182  | predicted gene, 23182                           | 128349241 | 128349375 | TC1000001600.mm.1 | 0.0  | 0.898678 |
| TC1700002674.mm.1 | ENSMUST00000170669 | 1810022  | RIKEN cDNA 1810022K09 gene                      | 106034662 | 106035056 | TC0300001100.mm.1 | 0.0  | 0.898804 |
| TC1700002680.mm.1 | ENSMUST00000158913 | Gm25161  | predicted gene, 25161                           | 46481709  | 46481840  | TC0600002193.mm.1 | 0.0  | 0.898901 |
| TC1700002682.mm.1 | NM_134157          | Atp6v1b  | ATPase, H+ transporting, lysosomal V1 subunit B | 83743017  | 83758832  | TC0600000937.mm.1 | 0.0  | 0.898936 |
| TC1700002684.mm.1 | ENSMUST00000158158 | Gm25374  | predicted gene, 25374                           | 75909827  | 75909927  | TC0500000715.mm.1 | 0.0  | 0.898961 |
| TC1700002692.mm.1 | NM_001272023       | Scnn1b   | sodium channel, nonvoltage-gated 1 beta         | 121865038 | 121918728 | TC0700001747.mm.1 | 0.0  | 0.899438 |
| TC1700002701.mm.1 | NM_174987          | Coa6     | cytochrome c oxidase assembly factor 6          | 126422501 | 126425435 | TC0800001577.mm.1 | 0.0  | 0.899524 |
| TC1700002713.mm.1 | ENSMUST00000158664 | Gm26021  | predicted gene, 26021                           | 29234434  | 29234564  | TC0600000225.mm.1 | 0.0  | 0.899571 |
| TC1700002723.mm.1 | NR_030479          | Mir697   | microRNA 697                                    | 124731694 | 124731802 | TC0400001423.mm.1 | 0.0  | 0.899982 |
| TC1700002733.mm.1 | ENSMUST00000182893 | Gm5313   | predicted gene 5313                             | 93137004  | 93137990  | TC0600002757.mm.1 | 0.0  | 0.900098 |
| TC1700002748.mm.1 | NM_024439          | Vimp     | VCP-interacting membrane protein                | 66079649  | 66089412  | TC0700000990.mm.1 | 0.0  | 0.900275 |
| TC1700002749.mm.1 | ENSMUST00000159266 | Gm2962   | predicted pseudogene 2962                       | 170925309 | 170925644 | TC0100003521.mm.1 | 0.0  | 0.900519 |
| TC1700002751.mm.1 | ENSMUST00000164366 | Gm3752   | predicted gene 3752                             | 7466362   | 7483762   | TC1400002853.mm.1 | 0.0  | 0.900998 |
| TC1700002755.mm.1 | ENSMUST00000166539 | Gm2308   | predicted gene 2308                             | 42125200  | 42126203  | TC0700002919.mm.1 | 0.0  | 0.901332 |
| TC1700002756.mm.1 | ENSMUST00000083794 | Gm26175  | predicted gene, 26175                           | 97162817  | 97162947  | TC0600002798.mm.1 | 0.0  | 0.901396 |
| TC1700002763.mm.1 | XM_003688864       | Gm21399  | peroxiredoxin 1 pseudogene                      | 129252951 | 129282844 | TC0800001604.mm.1 | 0.0  | 0.901428 |
| TC1700002768.mm.1 | ENSMUST00000158553 | Gm22429  | predicted gene, 22429                           | 65170041  | 65170170  | TC1600001846.mm.1 | 0.0  | 0.901554 |
| TC1700002769.mm.1 | ENSMUST00000158247 | Gm25865  | predicted gene, 25865                           | 30457968  | 30458071  | TC1200001586.mm.1 | 0.0  | 0.901557 |
| TC1700002770.mm.1 | NM_016753          | Lxn      | latexin                                         | 67457998  | 67463926  | TC0300002113.mm.1 | 0.0  | 0.901648 |
| TC1700002772.mm.1 | NM_172832          | Pcyox1l  | prenylcysteine oxidase 1 like                   | 61696837  | 61707635  | TC1800001428.mm.1 | 0.0  | 0.901673 |
| TC1700002777.mm.1 | NM_028352          | Pgm3     | phosphoglucosyltransferase 3                    | 86552476  | 86571842  | TC0900002779.mm.1 | 0.0  | 0.901799 |
| TC1700002780.mm.1 | ENSMUST00000158539 | Gm24131  | predicted gene, 24131                           | 141566143 | 141566249 | TC0500003524.mm.1 | 0.0  | 0.901854 |
| TC1700002782.mm.1 | NM_153112          | Cadm4    | cell adhesion molecule 4                        | 24482023  | 24504539  | TC0700000384.mm.1 | 0.0  | 0.90206  |
| TC1700002783.mm.1 | ENSMUST00000180320 | Gm15429  | predicted pseudogene 15429                      | 161725536 | 161727682 | TC0100003376.mm.1 | 0.0  | 0.902082 |
| TC1700002786.mm.1 | NM_001033268       | Fam120a  | family with sequence similarity 120, member A   | 48640837  | 48968017  | TC1300001947.mm.1 | 0.0  | 0.902089 |
| TC1700002788.mm.1 | XM_001475054       | Gm20853  | predicted gene, 20853                           | 34781126  | 34781809  | TC0Y00000109.mm.1 | 0.0  | 0.902373 |
| TC1700002790.mm.1 | NM_028597          | Thoc3    | THO complex 3                                   | 54458837  | 54468849  | TC1300002031.mm.1 | 0.0  | 0.902699 |
| TC1700002791.mm.1 | NM_022416          | Stk32b   | serine/threonine kinase 32B                     | 37446825  | 37717153  | TC0500002274.mm.1 | 0.0  | 0.902721 |
| TC1700002795.mm.1 | NCBI_Gene:677858:p | Igkv8-2  | immunoglobulin kappa chain variable 8-24        | 70216858  | 70217421  | TC0600003589.mm.1 | -0.1 | 0.903201 |
| TC1700002796.mm.1 | ENSMUST00000104761 | Mir297a  | microRNA 297a-4                                 | 10517067  | 10517164  | TC0200000202.mm.1 | 0.0  | 0.903205 |
| TC1700002801.mm.1 | ENSMUST00000099754 | Olfir127 | olfactory receptor 1270                         | 90149019  | 90150036  | TC0200004082.mm.1 | 0.0  | 0.90344  |
| TC1700002808.mm.1 | NM_007772          | Hivp1    | human immunodeficiency virus type I enhancer I  | 42052021  | 42185026  | TC1300000476.mm.1 | 0.0  | 0.903467 |
| TC1700002809.mm.1 | NM_011873          | Dazap2   | DAZ associated protein 2                        | 100615628 | 100620761 | TC1500001051.mm.1 | 0.0  | 0.903558 |
| TC1700002813.mm.1 | NM_134137          | Lars     | leucyl-tRNA synthetase                          | 42202349  | 42262122  | TC1800001255.mm.1 | 0.0  | 0.90362  |
| TC1700002814.mm.1 | ENSMUST00000182832 | Gm7734   | predicted gene 7734                             | 32897719  | 32898729  | TC1400000354.mm.1 | 0.0  | 0.90371  |
| TC1700002816.mm.1 | ENSMUST00000118653 | Gm8864   | predicted gene 8864                             | 88572051  | 88573060  | TC0X00002589.mm.1 | 0.0  | 0.903747 |
| TC1700002817.mm.1 | NM_001003405       | Try5     | trypsin 5                                       | 41311232  | 41316841  | TC0600002154.mm.1 | 0.0  | 0.903867 |
| TC1700002819.mm.1 | NM_025927          | Mrp145   | mitochondrial ribosomal protein L45             | 97315716  | 97329920  | TC1100001535.mm.1 | 0.0  | 0.904125 |
| TC1700002822.mm.1 | NM_016983          | Vpreb2   | pre-B lymphocyte gene 2                         | 17980563  | 17981080  | TC1600000232.mm.1 | 0.0  | 0.904213 |
| TC1700002823.mm.1 | ENSMUST00000082772 | Gm22508  | predicted gene, 22508                           | 69777936  | 69778045  | TC1800001531.mm.1 | 0.0  | 0.904215 |
| TC1800000030.mm.1 | NM_023167          | Mrp14    | mitochondrial ribosomal protein L4              | 21002737  | 21008839  | TC0900000183.mm.1 | 0.0  | 0.904398 |
| TC1800000044.mm.1 | ENSMUST00000178286 | Gm21832  | predicted gene, 21832                           | 61385179  | 61385862  | TC0Y00000410.mm.1 | 0.0  | 0.904738 |

|                   |                    |          |                                                 |           |           |                    |     |          |
|-------------------|--------------------|----------|-------------------------------------------------|-----------|-----------|--------------------|-----|----------|
| TC1800000050.mm.1 | ENSMUST00000119085 | Gm14470  | predicted gene 14470                            | 10680964  | 10681429  | TC0X00000130.mm.1  | 0.0 | 0.90519  |
| TC1800000051.mm.1 | XM_001476854       | Gm14759  | predicted gene 14759                            | 74804799  | 74805560  | TC0X00000727.mm.1  | 0.0 | 0.905244 |
| TC1800000052.mm.1 | XM_001476944       | Gm16388  | predicted pseudogene 16388                      | 74889663  | 74890424  | TC0X00002467.mm.1  | 0.0 | 0.905244 |
| TC1800000059.mm.1 | ENSMUST00000122185 | Gm13676  | predicted gene 13676                            | 82543932  | 82544522  | TC0200003851.mm.1  | 0.0 | 0.905336 |
| TC1800000061.mm.1 | OTTMUST00000092418 | RP23-22  | ---                                             | 4334763   | 4354687   | TC1400002790.mm.1  | 0.0 | 0.90542  |
| TC1800000063.mm.1 | ENSMUST00000178029 | Gm8910   | predicted gene 8910                             | 11014399  | 11015163  | TC0300001653.mm.1  | 0.0 | 0.9058   |
| TC1800000066.mm.1 | ENSMUST00000100608 | Gm5046   | predicted gene 5046                             | 65015156  | 65015467  | TC1500000475.mm.1  | 0.0 | 0.905839 |
| TC1800000069.mm.1 | ENSMUST00000118655 | Gm12182  | predicted gene, 23862                           | 48734554  | 48735561  | TC1100002630.mm.1  | 0.0 | 0.906219 |
| TC1800000087.mm.1 | ENSMUST00000180349 | LOC1010  | Y-linked testis-specific protein 1-like // Y-I  | 37100588  | 37101292  | TC0Y00000118.mm.1  | 0.0 | 0.906223 |
| TC1800000091.mm.1 | ENSMUST00000101956 | Gm23942  | predicted gene, 23942                           | 5277344   | 5277450   | TC0700002190.mm.1  | 0.0 | 0.906241 |
| TC1800000094.mm.1 | ENSMUST00000093641 | n-R5s15  | nuclear encoded rRNA 5S 152                     | 20010084  | 20010202  | TC0700002510.mm.1  | 0.0 | 0.906281 |
| TC1800000098.mm.1 | NM_023247          | Ndufaf3  | NADH dehydrogenase (ubiquinone) 1 alpha subc    | 108565865 | 108567382 | TC0900003062.mm.1  | 0.0 | 0.906289 |
| TC1800000099.mm.1 | ENSMUST00000180342 | Gm23862  | predicted gene, 23862                           | 59673461  | 59673554  | TC0700003272.mm.1  | 0.0 | 0.906315 |
| TC1800000100.mm.1 | ENSMUST00000168858 | Gm11096  | predicted gene 11096                            | 81441763  | 81441923  | TC1700001227.mm.1  | 0.1 | 0.906358 |
| TC1800000103.mm.1 | ENSMUST00000177849 | Snord11  | small nucleolar RNA, C/D box 116                | 59754002  | 59754095  | TC0700003300.mm.1  | 0.0 | 0.906443 |
| TC1800000109.mm.1 | ENSMUST00000180346 | Snord11  | small nucleolar RNA, C/D box 116                | 59771656  | 59771749  | TC0700003307.mm.1  | 0.0 | 0.906443 |
| TC1800000119.mm.1 | ENSMUST00000178388 | Snord11  | small nucleolar RNA, C/D box 116                | 59789331  | 59789424  | TC0700003314.mm.1  | 0.0 | 0.906443 |
| TC1800000121.mm.1 | ENSMUST00000179388 | Snord11  | small nucleolar RNA, C/D box 116                | 59794360  | 59794453  | TC0700003316.mm.1  | 0.0 | 0.906443 |
| TC1800000124.mm.1 | ENSMUST00000178047 | Snord11  | small nucleolar RNA, C/D box 116                | 59801956  | 59802049  | TC0700003319.mm.1  | 0.0 | 0.906443 |
| TC1800000127.mm.1 | ENSMUST00000178329 | Snord11  | small nucleolar RNA, C/D box 116                | 59806995  | 59807088  | TC0700003321.mm.1  | 0.0 | 0.906443 |
| TC1800000134.mm.1 | ENSMUST00000180227 | Snord11  | small nucleolar RNA, C/D box 116                | 59859214  | 59859307  | TC0700003322.mm.1  | 0.0 | 0.906443 |
| TC1800000136.mm.1 | ENSMUST00000178936 | Snord11  | small nucleolar RNA, C/D box 116                | 59861731  | 59861824  | TC0700003323.mm.1  | 0.0 | 0.906443 |
| TC1800000145.mm.1 | ENSMUST00000178777 | Snord11  | small nucleolar RNA, C/D box 116                | 59866788  | 59866881  | TC0700003325.mm.1  | 0.0 | 0.906443 |
| TC1800000147.mm.1 | ENSMUST00000177940 | Snord11  | small nucleolar RNA, C/D box 116                | 59869330  | 59869423  | TC0700003326.mm.1  | 0.0 | 0.906443 |
| TC1800000157.mm.1 | ENSMUST00000177737 | Snord11  | small nucleolar RNA, C/D box 116                | 59874380  | 59874473  | TC0700003328.mm.1  | 0.0 | 0.906443 |
| TC1800000160.mm.1 | ENSMUST00000179889 | Snord11  | small nucleolar RNA, C/D box 116                | 59879459  | 59879552  | TC0700003330.mm.1  | 0.0 | 0.906443 |
| TC1800000165.mm.1 | ENSMUST00000179895 | Snord11  | small nucleolar RNA, C/D box 116                | 59881989  | 59882082  | TC0700003331.mm.1  | 0.0 | 0.906443 |
| TC1800000166.mm.1 | ENSMUST00000179955 | Snord11  | small nucleolar RNA, C/D box 116                | 59884499  | 59884592  | TC0700003333.mm.1  | 0.0 | 0.906443 |
| TC1800000172.mm.1 | ENSMUST00000179927 | Snord11  | small nucleolar RNA, C/D box 116                | 59887057  | 59887150  | TC0700003334.mm.1  | 0.0 | 0.906443 |
| TC1800000178.mm.1 | ENSMUST00000177982 | Snord11  | small nucleolar RNA, C/D box 116                | 59889593  | 59889686  | TC0700003335.mm.1  | 0.0 | 0.906443 |
| TC1800000179.mm.1 | ENSMUST00000178370 | Snord11  | small nucleolar RNA, C/D box 116                | 59892111  | 59892204  | TC0700003336.mm.1  | 0.0 | 0.906443 |
| TC1800000190.mm.1 | ENSMUST00000179053 | Snord11  | small nucleolar RNA, C/D box 116                | 59899687  | 59899780  | TC0700003339.mm.1  | 0.0 | 0.906443 |
| TC1800000192.mm.1 | ENSMUST00000180312 | Snord11  | small nucleolar RNA, C/D box 116                | 59902213  | 59902306  | TC0700003340.mm.1  | 0.0 | 0.906443 |
| TC1800000198.mm.1 | ENSMUST00000157639 | Gm24783  | predicted gene, 24783                           | 121914560 | 121914659 | TC0X00000193.mm.1  | 0.0 | 0.90645  |
| TC1800000199.mm.1 | ENSMUST00000086830 | Gm6990   | predicted pseudogene 6990                       | 56754999  | 56755346  | TC1900001708.mm.1  | 0.0 | 0.906935 |
| TC1800000200.mm.1 | ENSMUST00000184937 | U4       | U4 spliceosomal RNA                             | 22772751  | 22772835  | TC09000001915.mm.1 | 0.0 | 0.907006 |
| TC1800000201.mm.1 | ENSMUST00000184486 | Gm12117  | predicted gene 12117                            | 33275758  | 33276737  | TC1100002489.mm.1  | 0.0 | 0.907053 |
| TC1800000209.mm.1 | NM_001103158       | Gm13242  | predicted gene 13242                            | 145670685 | 145704441 | TC0400001869.mm.1  | 0.0 | 0.90711  |
| TC1800000226.mm.1 | NM_025839          | Nudt16l  | nudix (nucleoside diphosphate linked moiety X)- | 4939111   | 4941021   | TC1600000040.mm.1  | 0.0 | 0.907453 |
| TC1800000243.mm.1 | ENSMUST00000158748 | Gm22138  | predicted gene, 22138                           | 86703819  | 86703946  | TC09000001117.mm.1 | 0.0 | 0.907565 |
| TC1800000249.mm.1 | ENSMUST00000175218 | Gm26231  | predicted gene, 26231                           | 20035154  | 20035220  | TC0900000159.mm.1  | 0.0 | 0.907596 |
| TC1800000252.mm.1 | ENSMUST00000174906 | Gm22234  | predicted gene, 22234                           | 109319452 | 109319516 | TC1200002366.mm.1  | 0.0 | 0.907596 |
| TC1800000253.mm.1 | BC115500           | Krtap10  | keratin associated protein 10-4                 | 77826169  | 77827070  | TC1000002435.mm.1  | 0.0 | 0.907662 |
| TC1800000259.mm.1 | NM_177344          | Tmem203  | transmembrane protein 203                       | 25255439  | 25256352  | TC0200000404.mm.1  | 0.0 | 0.90771  |
| TC1800000261.mm.1 | ENSMUST00000173338 | Gm2991   | predicted pseudogene 2991                       | 65928454  | 65928933  | TC1500001645.mm.1  | 0.0 | 0.907802 |
| TC1800000264.mm.1 | XM_003688893       | Gm21067  | predicted gene, 21067                           | 23776486  | 23800646  | TC1200001523.mm.1  | 0.0 | 0.907827 |
| TC1800000265.mm.1 | ENSMUST00000158290 | Gm22606  | predicted gene, 22606                           | 79348365  | 79348467  | TC0200001160.mm.1  | 0.0 | 0.907971 |
| TC1800000291.mm.1 | NM_001159536       | Adcy3    | adenylate cyclase 3                             | 4133103   | 4213525   | TC1200000021.mm.1  | 0.0 | 0.908017 |
| TC1800000292.mm.1 | NM_001177750       | Gm10767  | predicted gene 10767                            | 66904914  | 66909236  | TC1300000814.mm.1  | 0.0 | 0.908436 |
| TC1800000293.mm.1 | ENSMUST00000122703 | Gm22717  | predicted gene, 22717                           | 90315910  | 90316080  | TC09000001159.mm.1 | 0.0 | 0.908515 |
| TC1800000301.mm.1 | NM_001012307       | Defa23   | defensin, alpha, 23                             | 21055040  | 21056017  | TC0800000212.mm.1  | 0.0 | 0.908966 |
| TC1800000309.mm.1 | NM_144514          | Comm1d1  | COMM domain containing 1                        | 22896136  | 22982382  | TC1100004290.mm.1  | 0.0 | 0.909187 |
| TC1800000317.mm.1 | NM_174874          | Atg4b    | autophagy related 4B, cysteine peptidase        | 93751500  | 93789529  | TC0100000944.mm.1  | 0.0 | 0.909533 |
| TC1800000318.mm.1 | ENSMUST00000158428 | Gm23352  | predicted gene, 23352                           | 14791941  | 14792004  | TC1700001485.mm.1  | 0.0 | 0.909582 |
| TC1800000319.mm.1 | ENSMUST00000082656 | Gm22301  | predicted gene, 22301                           | 95099500  | 95099606  | TC03000000887.mm.1 | 0.0 | 0.909719 |
| TC1800000321.mm.1 | ENSMUST00000157480 | Gm22379  | predicted gene, 22379                           | 118775152 | 118775282 | TC14000001287.mm.1 | 0.0 | 0.909943 |
| TC1800000331.mm.1 | NM_153519          | Txndc2   | thioredoxin domain containing 2 (spermatzoa)    | 65637505  | 65642204  | TC1700002413.mm.1  | 0.0 | 0.910402 |
| TC1800000336.mm.1 | ENSMUST00000083302 | n-R5s19  | nuclear encoded rRNA 5S 197                     | 88906510  | 88906628  | TC03000000741.mm.1 | 0.0 | 0.910402 |
| TC1800000342.mm.1 | NM_181547          | Nostrin  | nitric oxide synthase trafficker                | 69135800  | 69189330  | TC0200001002.mm.1  | 0.0 | 0.910456 |
| TC1800000343.mm.1 | NM_178848          | Sirt5    | sirtuin 5 (silent mating type information regul | 43365506  | 43395203  | TC1300000490.mm.1  | 0.0 | 0.910461 |
| TC1800000344.mm.1 | NM_146675          | Olfir820 | olfactory receptor 820                          | 130017301 | 130018361 | TC1000001657.mm.1  | 0.0 | 0.910546 |
| TC1800000351.mm.1 | NM_153134          | Irgq     | immunity-related GTPase family, Q               | 24530648  | 24538600  | TC0700000386.mm.1  | 0.0 | 0.910631 |
| TC1800000358.mm.1 | ENSMUST00000083702 | Gm24254  | predicted gene, 24254                           | 92039917  | 92040020  | TC0800001069.mm.1  | 0.0 | 0.911021 |
| TC1800000368.mm.1 | NM_134029          | Otf5m    | 5,3-nucleotidase, mitochondrial                 | 59839447  | 59880968  | TC1100000738.mm.1  | 0.0 | 0.911156 |
| TC1800000380.mm.1 | ENSMUST00000178787 | NTTMUSG  | ---                                             | 124493731 | 124493793 | TC09000003322.mm.1 | 0.0 | 0.911159 |
| TC1800000393.mm.1 | ENSMUST00000179230 | Gm4076   | predicted gene 4076                             | 85126999  | 85127514  | TC1300002378.mm.1  | 0.0 | 0.911287 |
| TC1800000394.mm.1 | ENSMUST00000104095 | n-R5s15  | nuclear encoded rRNA 5S 158                     | 128774846 | 128774963 | TC0700004372.mm.1  | 0.0 | 0.911336 |
| TC1800000396.mm.1 | NM_013565          | Irga3    | integrin alpha 3                                | 95044474  | 95076801  | TC1100003584.mm.1  | 0.0 | 0.911432 |
| TC1800000397.mm.1 | ENSMUST00000175985 | Gm20706  | predicted gene 20706                            | 24138341  | 24140363  | TC06000001940.mm.1 | 0.0 | 0.911506 |
| TC1800000400.mm.1 | NM_001163503       | 2010001  | RIKEN cDNA 2010001E11 gene                      | 39920382  | 39926923  | TC1000002031.mm.1  | 0.0 | 0.911568 |
| TC1800000401.mm.1 | ENSMUST00000108014 | Gm10985  | predicted gene 10985                            | 53845086  | 53845278  | TC0300000404.mm.1  | 0.0 | 0.911758 |
| TC1800000405.mm.1 | ENSMUST00000157596 | Gm22602  | predicted gene, 22602                           | 90450910  | 90451004  | TC1000001099.mm.1  | 0.0 | 0.911953 |
| TC1800000425.mm.1 | ENSMUST00000122710 | Gm22720  | predicted gene, 22720                           | 105673465 | 105673551 | TC0900002996.mm.1  | 0.0 | 0.911991 |
| TC1800000427.mm.1 | ENSMUST00000158162 | Gm25371  | predicted gene, 25371                           | 69075015  | 69075115  | TC1100000897.mm.1  | 0.0 | 0.912336 |
| TC1800000433.mm.1 | ENSMUST00000157237 | Gm23048  | predicted gene, 23048                           | 19437687  | 19437815  | TC0900000149.mm.1  | 0.0 | 0.912413 |
| TC1800000437.mm.1 | NM_053162          | Mrpl34   | mitochondrial ribosomal protein L34             | 71464926  | 71465753  | TC0800000790.mm.1  | 0.0 | 0.912475 |
| TC1800000442.mm.1 | NM_146724          | Olfir512 | olfactory receptor 512                          | 108713320 | 108714375 | TC0700001604.mm.1  | 0.0 | 0.912533 |
| TC1800000444.mm.1 | NM_008732          | Slc11a2  | solute carrier family 11 (proton-coupled divale | 100387898 | 100425072 | TC1500002238.mm.1  | 0.0 | 0.912563 |

|                   |                    |         |                                                 |           |           |                    |     |          |
|-------------------|--------------------|---------|-------------------------------------------------|-----------|-----------|--------------------|-----|----------|
| TC1800000476.mm.1 | ENSMUST00000082615 | Gm22977 | predicted gene, 22977                           | 54972431  | 54972537  | TC1600000734.mm.1  | 0.0 | 0.913062 |
| TC1800000478.mm.1 | ENSMUST00000180105 | Gm21798 | predicted gene, 21798                           | 64817694  | 64937996  | TC1500000474.mm.1  | 0.0 | 0.913085 |
| TC1800000480.mm.1 | ENSMUST00000083257 | Gm23458 | predicted gene, 23458                           | 123360832 | 123361000 | TC0500001414.mm.1  | 0.0 | 0.913404 |
| TC1800000484.mm.1 | ENSMUST00000104573 | Gm25214 | predicted gene, 25214                           | 168882040 | 168882168 | TC0200005224.mm.1  | 0.0 | 0.913446 |
| TC1800000488.mm.1 | XM_003084889       | Gm19340 | predicted gene, 19340                           | 25282595  | 25282936  | TC1200000217.mm.1  | 0.0 | 0.913727 |
| TC1800000489.mm.1 | NM_001167751       | Ccdc132 | coiled-coil domain containing 132               | 3498382   | 3603531   | TC0600000004.mm.1  | 0.0 | 0.913821 |
| TC1800000498.mm.1 | NM_146691          | Olfr146 | olfactory receptor 1467                         | 13364630  | 13365556  | TC1900000271.mm.1  | 0.0 | 0.913865 |
| TC1800000500.mm.1 | NM_001195205       | Trmt2a  | TRM2 tRNA methyltransferase 2A                  | 18248679  | 18254772  | TC1600000238.mm.1  | 0.0 | 0.913974 |
| TC1800000510.mm.1 | ENSMUST00000082389 | mt-Tv   | mitochondrially encoded tRNA valine             | 1025      | 1093      | TC0M00000003.mm.1  | 0.0 | 0.913983 |
| TC1800000516.mm.1 | NM_001177487       | Gm15292 | predicted gene 15292                            | 21249754  | 21250556  | TC0800000226.mm.1  | 0.0 | 0.914083 |
| TC1800000518.mm.1 | ENSMUST00000160999 | Gm8185  | predicted gene 8185                             | 76935163  | 76935831  | TC1300000931.mm.1  | 0.0 | 0.914142 |
| TC1800000523.mm.1 | ENSMUST00000083123 | Gm25703 | predicted gene, 25703                           | 129315329 | 129315479 | TC0200004600.mm.1  | 0.0 | 0.914147 |
| TC1800000534.mm.1 | ENSMUST00000082830 | Gm23517 | predicted gene, 23517                           | 85351063  | 85351254  | TC18000002001.mm.1 | 0.0 | 0.914149 |
| TC1800000538.mm.1 | NM_028844          | Aven    | apoptosis, caspase activation inhibitor         | 112492964 | 112634573 | TC0200001675.mm.1  | 0.0 | 0.914276 |
| TC1800000546.mm.1 | ENSMUST00000083335 | Gm23456 | predicted gene, 23456                           | 148642524 | 148642660 | TC0600003465.mm.1  | 0.0 | 0.914281 |
| TC1800000559.mm.1 | ENSMUST00000083879 | n-R5s3  | nuclear encoded rRNA 5S 3                       | 13215698  | 13215809  | TC0X00001866.mm.1  | 0.0 | 0.914319 |
| TC1800000561.mm.1 | NM_001011789       | Olfr222 | olfactory receptor 222                          | 59570695  | 59571813  | TC1100002855.mm.1  | 0.0 | 0.914441 |
| TC1800000564.mm.1 | ENSMUST00000163410 | Gm3030  | predicted gene 3030                             | 4536038   | 4538795   | TC1400000026.mm.1  | 0.0 | 0.914752 |
| TC1800000566.mm.1 | ENSMUST00000175494 | Gm23268 | predicted gene, 23268                           | 135837295 | 135837372 | TC0500003407.mm.1  | 0.0 | 0.915548 |
| TC1800000605.mm.1 | NM_133739          | Tmem123 | transmembrane protein 123                       | 7764041   | 7794333   | TC0900000055.mm.1  | 0.0 | 0.915804 |
| TC1800000607.mm.1 | ENSMUST00000179316 | Gm22252 | predicted gene, 22252                           | 59525899  | 59525977  | TC0700003220.mm.1  | 0.0 | 0.915871 |
| TC1800000609.mm.1 | ENSMUST00000096579 | Gm6304  | predicted gene 6304                             | 15011246  | 15011692  | TC1800000127.mm.1  | 0.0 | 0.915941 |
| TC1800000611.mm.1 | XR_105200          | Gm17491 | predicted gene, 17491                           | 22480261  | 22483332  | TC0800000278.mm.1  | 0.0 | 0.916149 |
| TC1800000612.mm.1 | ENSMUST00000158350 | Gm23760 | predicted gene, 23760                           | 14113316  | 14113431  | TC0600000102.mm.1  | 0.0 | 0.916469 |
| TC1800000617.mm.1 | ENSMUST00000172308 | Gm3715  | predicted gene 3715                             | 7223692   | 7229138   | TC1400001422.mm.1  | 0.0 | 0.916515 |
| TC1800000625.mm.1 | ENSMUST00000104148 | Gm23011 | predicted gene, 23011                           | 133588406 | 133588537 | TC0300002983.mm.1  | 0.0 | 0.917175 |
| TC1800000646.mm.1 | NM_001081403       | Klhl14  | kelch-like 14                                   | 21550377  | 21654718  | TC18000001060.mm.1 | 0.0 | 0.917228 |
| TC1800000651.mm.1 | NM_001168498       | Ncmmap  | noncompact myelin associated protein            | 135369576 | 135398227 | TC0400003761.mm.1  | 0.0 | 0.917362 |
| TC1800000652.mm.1 | ENSMUST00000104517 | n-R5s20 | nuclear encoded rRNA 5S 202                     | 112469253 | 112469366 | TC0200004354.mm.1  | 0.0 | 0.91745  |
| TC1800000653.mm.1 | NM_016860          | Actr1a  | ARP1 actin-related protein 1A, centractin alpha | 46376813  | 46395735  | TC1900001603.mm.1  | 0.0 | 0.917463 |
| TC1800000655.mm.1 | ENSMUST00000083985 | Gm24449 | predicted gene, 24449                           | 69586153  | 69586258  | TC1200001870.mm.1  | 0.0 | 0.917505 |
| TC1800000664.mm.1 | NM_011851          | Nt5e    | 5 nucleotidase, ecto                            | 88327609  | 88327089  | TC09000001128.mm.1 | 0.0 | 0.917536 |
| TC1800000666.mm.1 | NM_001034893       | Zfp936  | zinc finger protein 936                         | 43177588  | 43192109  | TC0700000753.mm.1  | 0.0 | 0.917609 |
| TC1800000668.mm.1 | ENSMUST00000116942 | Gm22030 | predicted gene, 22030                           | 35977516  | 35977578  | TC0800002058.mm.1  | 0.0 | 0.917691 |
| TC1800000677.mm.1 | ENSMUST00000164491 | Gm765   | predicted gene 765                              | 98238014  | 98342754  | TC06000002811.mm.1 | 0.0 | 0.917805 |
| TC1800000698.mm.1 | NM_019741          | Slc2a5  | solute carrier family 2 (facilitated glucose tr | 150119283 | 150144169 | TC04000001970.mm.1 | 0.0 | 0.917975 |
| TC1800000700.mm.1 | XR_105063          | 1700124 | RIKEN cDNA 1700124L16 gene                      | 83761756  | 83762532  | TC06000002581.mm.1 | 0.0 | 0.918024 |
| TC1800000702.mm.1 | ENSMUST00000175280 | Gm25303 | predicted gene, 25303                           | 36798698  | 36798771  | TC1500001385.mm.1  | 0.0 | 0.918039 |
| TC1800000704.mm.1 | XM_001475847       | Gm3043  | predicted gene 3043                             | 3688719   | 3698681   | TC14000000011.mm.1 | 0.0 | 0.918042 |
| TC1800000708.mm.1 | NR_033306          | Ndufs6  | NADH dehydrogenase (ubiquinone) Fe-S protein    | 73319874  | 73328542  | TC1300002299.mm.1  | 0.0 | 0.918126 |
| TC1800000710.mm.1 | ENSMUST00000157326 | Gm22558 | predicted gene, 22558                           | 17006107  | 17006201  | TC02000001274.mm.1 | 0.0 | 0.918167 |
| TC1800000714.mm.1 | NM_008635          | Map7    | microtubule-associated protein 7                | 20148471  | 20281590  | TC1000000150.mm.1  | 0.0 | 0.918169 |
| TC1800000738.mm.1 | ENSMUST00000104499 | Gm22497 | predicted gene, 22497                           | 109537039 | 109537169 | TC0400001166.mm.1  | 0.0 | 0.91832  |
| TC1800000758.mm.1 | NM_001042605       | Cd74    | CD74 antigen (invariant polypeptide of major hi | 60803848  | 60812652  | TC1800000617.mm.1  | 0.0 | 0.918501 |
| TC1800000771.mm.1 | NM_026527          | Chac2   | ChaC, cation transport regulator 2              | 30976707  | 30986365  | TC1100002451.mm.1  | 0.0 | 0.918631 |
| TC1800000775.mm.1 | ENSMUST00000168292 | Gm20721 | predicted gene, 20721                           | 174330319 | 174346712 | TC02000005313.mm.1 | 0.0 | 0.918754 |
| TC1800000794.mm.1 | ENSMUST00000101884 | Gm22004 | predicted gene, 22004                           | 86655125  | 86655231  | TC1200000854.mm.1  | 0.0 | 0.918836 |
| TC1800000797.mm.1 | ENSMUST00000157693 | Gm26187 | predicted gene, 26187                           | 87251148  | 87251248  | TC0100000812.mm.1  | 0.0 | 0.91984  |
| TC1800000798.mm.1 | ENSMUST00000104983 | B020018 | RIKEN cDNA B020018G12 gene                      | 175977777 | 175979114 | TC0100003615.mm.1  | 0.0 | 0.919962 |
| TC1800000799.mm.1 | ENSMUST00000119613 | Gm5939  | predicted pseudogene 5939                       | 78855408  | 78858281  | TC0X000002519.mm.1 | 0.0 | 0.920075 |
| TC1800000800.mm.1 | ENSMUST00000102427 | Gm23193 | predicted gene, 23193                           | 111194964 | 111195045 | TC08000001329.mm.1 | 0.0 | 0.920159 |
| TC1800000801.mm.1 | NM_133214          | Smco4   | single-pass membrane protein with coiled-coil d | 15493432  | 15545260  | TC09000000124.mm.1 | 0.0 | 0.92024  |
| TC1800000802.mm.1 | NM_025697          | Spryd7  | SPRY domain containing 7                        | 61531993  | 61556886  | TC14000002193.mm.1 | 0.0 | 0.920265 |
| TC1800000830.mm.1 | ENSMUST00000083760 | Gm25411 | predicted gene, 25411                           | 66436082  | 66436232  | TC01000000557.mm.1 | 0.0 | 0.92037  |
| TC1800000833.mm.1 | ENSMUST00000175515 | Gm22933 | predicted gene, 22933                           | 90953795  | 90953868  | TC16000000993.mm.1 | 0.0 | 0.920559 |
| TC1800000834.mm.1 | ENSMUST00000158046 | Gm23662 | predicted gene, 23662                           | 113119698 | 113119808 | TC07000001659.mm.1 | 0.0 | 0.920623 |
| TC1800000838.mm.1 | NM_001163762       | 6430548 | RIKEN cDNA 6430548M08 gene                      | 120114152 | 120165307 | TC08000001436.mm.1 | 0.0 | 0.920968 |
| TC1800000840.mm.1 | ENSMUST00000104425 | Gm25497 | predicted gene, 25497                           | 41348441  | 41348572  | TC1200001674.mm.1  | 0.0 | 0.920979 |
| TC1800000841.mm.1 | ENSMUST00000157566 | Gm23903 | predicted gene, 23903                           | 27061736  | 27061866  | TC1500001295.mm.1  | 0.0 | 0.921023 |
| TC1800000858.mm.1 | ENSMUST00000171360 | Gm10128 | predicted gene 10128                            | 7640895   | 7643972   | TC14000001429.mm.1 | 0.0 | 0.921023 |
| TC1800000867.mm.1 | ENSMUST00000104016 | Gm25610 | predicted gene, 25610                           | 12013623  | 12013751  | TC1200000095.mm.1  | 0.0 | 0.921028 |
| TC1800000877.mm.1 | NM_146598          | Olfr695 | olfactory receptor 695                          | 106713732 | 106716345 | TC07000004015.mm.1 | 0.0 | 0.921588 |
| TC1800000884.mm.1 | NR_034047          | Snora19 | small nucleolar RNA, H/ACA box 19               | 24942236  | 24942367  | TC19000001290.mm.1 | 0.0 | 0.921645 |
| TC1800000896.mm.1 | NR_034047          | Snora19 | small nucleolar RNA, H/ACA box 19               | 60774330  | 60774461  | TC19000001750.mm.1 | 0.0 | 0.921645 |
| TC1800000904.mm.1 | ENSMUST00000121005 | Gm15192 | predicted gene 15192                            | 160298478 | 160298770 | TC0X000001632.mm.1 | 0.0 | 0.921858 |
| TC1800000908.mm.1 | NM_009448          | Tuba1c  | tubulin, alpha 1C                               | 99029891  | 99038112  | TC1500001002.mm.1  | 0.0 | 0.921905 |
| TC1800000909.mm.1 | ENSMUST00000171036 | Gm17391 | predicted gene, 17391                           | 22622752  | 22623087  | TC1200001507.mm.1  | 0.0 | 0.921936 |
| TC1800000911.mm.1 | NM_138591          | Gfm1    | G elongation factor, mitochondrial 1            | 67430096  | 67476529  | TC03000000550.mm.1 | 0.0 | 0.922028 |
| TC1800000914.mm.1 | ENSMUST00000157394 | Gm23826 | predicted gene, 23826                           | 66561254  | 66561372  | TC1200001844.mm.1  | 0.0 | 0.922182 |
| TC1800000915.mm.1 | NR_002901          | Snora68 | small nucleolar RNA, H/ACA box 68               | 70895759  | 70895889  | TC0X000002414.mm.1 | 0.0 | 0.922279 |
| TC1800000925.mm.1 | NM_028878          | Slc6a19 | solute carrier family 6 (neurotransmitter trans | 73679745  | 73704865  | TC1300002303.mm.1  | 0.0 | 0.922301 |
| TC1800000929.mm.1 | NM_008909          | Ppl     | periplakin                                      | 5086291   | 5132481   | TC16000001154.mm.1 | 0.0 | 0.922593 |
| TC1800000950.mm.1 | ENSMUST00000157539 | Gm23534 | predicted gene, 23534                           | 137367151 | 137367247 | TC01000003161.mm.1 | 0.0 | 0.922692 |
| TC1800000959.mm.1 | NM_145521          | Ppapdc3 | phosphatidic acid phosphatase type 2 domain cc  | 32095528  | 32110820  | TC0200000566.mm.1  | 0.0 | 0.923204 |
| TC1800000965.mm.1 | NM_0026048         | Cinp    | cyclin-dependent kinase 2 interacting protein   | 110872610 | 110889145 | TC12000002396.mm.1 | 0.0 | 0.923338 |
| TC1800000966.mm.1 | NM_183020          | Atxn2l  | ataxin 2-like                                   | 126491708 | 126503437 | TC07000004281.mm.1 | 0.0 | 0.923475 |
| TC1800000967.mm.1 | ENSMUST00000184749 | RP24-32 | N/A                                             | 80802651  | 80864861  | TC09000001071.mm.1 | 0.0 | 0.923619 |
| TC1800000971.mm.1 | ENSMUST00000162079 | Gm16289 | predicted gene 16289                            | 51361675  | 51361857  | TC1400002004.mm.1  | 0.0 | 0.923989 |

|                   |                    |         |                                                 |           |           |                   |     |          |
|-------------------|--------------------|---------|-------------------------------------------------|-----------|-----------|-------------------|-----|----------|
| TC1800000975.mm.1 | NM_023200          | Ppp1r7  | protein phosphatase 1, regulatory (inhibitor) s | 93342854  | 93373489  | TC0100000929.mm.1 | 0.0 | 0.924064 |
| TC1800000980.mm.1 | ENSMUST00000104850 | Gm25529 | predicted gene, 25529                           | 39048558  | 39048649  | TC0900002069.mm.1 | 0.0 | 0.924122 |
| TC1800000982.mm.1 | NM_026097          | Rffl    | ring finger and FVFE like domain containing pro | 82802449  | 82871210  | TC1100003369.mm.1 | 0.0 | 0.924922 |
| TC1800000983.mm.1 | NM_205819          | Tlr11   | toll-like receptor 11                           | 50357914  | 50363663  | TC1400000552.mm.1 | 0.0 | 0.924948 |
| TC1800000995.mm.1 | NM_028416          | Kremen2 | kringle containing transmembrane protein 2      | 23741199  | 23745829  | TC1700001603.mm.1 | 0.0 | 0.924949 |
| TC1800001003.mm.1 | ENSMUST00000182417 | Gm5354  | predicted gene 5354                             | 81308177  | 81309149  | TC0800002537.mm.1 | 0.0 | 0.924964 |
| TC1800001005.mm.1 | ENSMUST00000120891 | Gm13353 | predicted gene 13353                            | 18568126  | 18568198  | TC0200000300.mm.1 | 0.0 | 0.92512  |
| TC1800001009.mm.1 | NM_018854          | Ift20   | intraflagellar transport 20                     | 78536361  | 78541737  | TC1100001165.mm.1 | 0.0 | 0.925188 |
| TC1800001010.mm.1 | ENSMUST00000179930 | Gm3436  | predicted pseudogene 3436                       | 70852576  | 70853418  | TC0900000946.mm.1 | 0.0 | 0.925248 |
| TC1800001012.mm.1 | ENSMUST00000117318 | Gm11453 | predicted gene 11453                            | 162982255 | 162983261 | TC0200005084.mm.1 | 0.0 | 0.925435 |
| TC1800001017.mm.1 | NM_001146307       | Clcnka  | chloride channel Ka                             | 141384610 | 141398724 | TC0400003880.mm.1 | 0.0 | 0.925589 |
| TC1800001022.mm.1 | ENSMUST00000157632 | Gm24286 | predicted gene, 24286                           | 29395036  | 29395163  | TC1000000269.mm.1 | 0.0 | 0.925641 |
| TC1800001026.mm.1 | NM_175315          | Ceacam1 | carcinoembryonic antigen-related cell adhesion  | 16671331  | 16675705  | TC0700002435.mm.1 | 0.0 | 0.925795 |
| TC1800001043.mm.1 | ENSMUST00000175026 | Gm23364 | predicted gene, 23364                           | 94823733  | 94823805  | TC0600001120.mm.1 | 0.0 | 0.925863 |
| TC1800001047.mm.1 | ENSMUST00000174991 | Gm24025 | predicted gene, 24025                           | 76321204  | 76321279  | TC1300002343.mm.1 | 0.0 | 0.925863 |
| TC1800001048.mm.1 | NM_144539          | Slamf7  | SLAM family member 7                            | 171632403 | 171653037 | TC0100003550.mm.1 | 0.0 | 0.925893 |
| TC1800001050.mm.1 | NM_001024468       | Bcat1   | branched chain aminotransferase 1, cytosolic    | 144993835 | 145076184 | TC0600003412.mm.1 | 0.0 | 0.926152 |
| TC1800001053.mm.1 | NM_009909          | Cxcr2   | chemokine (C-X-C motif) receptor 2              | 74153989  | 74161246  | TC0100000622.mm.1 | 0.0 | 0.926222 |
| TC1800001059.mm.1 | NM_001164480       | Sipa1   | signal-induced proliferation associated gene 1  | 5651185   | 5663707   | TC1900000977.mm.1 | 0.0 | 0.92647  |
| TC1800001060.mm.1 | NM_001081412       | Bcr     | breakpoint cluster region                       | 75060896  | 75184923  | TC1000000708.mm.1 | 0.0 | 0.926603 |
| TC1800001070.mm.1 | XM_985778          | Gm8271  | predicted gene 8271                             | 5185793   | 5193743   | TC1400000041.mm.1 | 0.0 | 0.926736 |
| TC1800001075.mm.1 | ENSMUST00000100115 | Gm20775 | predicted gene, 20775                           | 10640942  | 10643315  | TC0Y00000264.mm.1 | 0.0 | 0.927074 |
| TC1800001083.mm.1 | ENSMUST00000121399 | Gm14113 | predicted gene 14113                            | 147289755 | 147290730 | TC0200002183.mm.1 | 0.0 | 0.927171 |
| TC1800001085.mm.1 | NM_178768          | Tmem72  | transmembrane protein 72                        | 116692630 | 116716913 | TC0600002980.mm.1 | 0.0 | 0.92724  |
| TC1800001103.mm.1 | XM_001476708       | Gm20895 | predicted gene, 20895                           | 26508824  | 26509507  | TC0Y00000078.mm.1 | 0.0 | 0.927393 |
| TC1800001104.mm.1 | XM_003689033       | Gm21476 | predicted gene, 21476                           | 27253916  | 27254599  | TC0Y00000080.mm.1 | 0.0 | 0.927393 |
| TC1800001106.mm.1 | XM_001476476       | Gm20893 | predicted gene, 20893                           | 27998840  | 27999523  | TC0Y00000083.mm.1 | 0.0 | 0.927393 |
| TC1800001112.mm.1 | NM_028005          | 2310047 | RIKEN cDNA 2310047M10 gene                      | 69059717  | 69061578  | TC1100000893.mm.1 | 0.0 | 0.927592 |
| TC1800001116.mm.1 | XR_104955          | Gm19617 | predicted gene, 19617                           | 148456903 | 148464685 | TC0500001823.mm.1 | 0.0 | 0.927774 |
| TC1800001119.mm.1 | NM_001077496       | Evi2b   | ecotropic viral integration site 2b             | 79513385  | 79530609  | TC1100003326.mm.1 | 0.0 | 0.927785 |
| TC1800001122.mm.1 | NM_173378          | Trp53bp | transformation related protein 53 binding prote | 182409167 | 182462436 | TC0100001745.mm.1 | 0.0 | 0.928054 |
| TC1800001137.mm.1 | NM_007776          | Crygd   | crystallin, gamma D                             | 65061838  | 65063452  | TC0100002477.mm.1 | 0.0 | 0.928072 |
| TC1800001141.mm.1 | NM_027244          | Ndufa11 | NADH dehydrogenase (ubiquinone) 1 alpha subc    | 56717762  | 56724248  | TC1700001015.mm.1 | 0.0 | 0.928139 |
| TC1800001143.mm.1 | NM_146093          | Ubxn1   | UBX domain protein 1                            | 8871496   | 8875663   | TC1900000162.mm.1 | 0.0 | 0.928365 |
| TC1800001145.mm.1 | NM_183270          | Coa4    | cytochrome c oxidase assembly factor 4          | 100537071 | 100540369 | TC0700001410.mm.1 | 0.0 | 0.928564 |
| TC1800001147.mm.1 | ENSMUST00000157129 | Gm23470 | predicted gene, 23470                           | 49001717  | 49001836  | TC1400001955.mm.1 | 0.0 | 0.928574 |
| TC1800001156.mm.1 | ENSMUST00000082561 | Gm24313 | predicted gene, 24313                           | 6619808   | 6619940   | TC1100002182.mm.1 | 0.0 | 0.928623 |
| TC1800001163.mm.1 | NM_001081337       | Sipa1l2 | signal-induced proliferation-associated 1 like  | 125418063 | 125569756 | TC0800003184.mm.1 | 0.0 | 0.928687 |
| TC1800001164.mm.1 | NCBI_Gene:384410:p | Igkv4-9 | immunoglobulin kappa variable 4-92              | 68755038  | 68755593  | TC0600003546.mm.1 | 0.0 | 0.928706 |
| TC1800001165.mm.1 | ENSMUST00000182282 | Gm17798 | predicted gene, 17798                           | 38184793  | 38185827  | TC0900000388.mm.1 | 0.0 | 0.92889  |
| TC1800001171.mm.1 | NM_146702          | Olfr144 | olfactory receptor 1444                         | 12861742  | 12862771  | TC1900000257.mm.1 | 0.0 | 0.929024 |
| TC1800001175.mm.1 | XM_001476116       | Gm3106  | predicted gene 3106                             | 94156577  | 94221533  | TC0500000901.mm.1 | 0.0 | 0.92931  |
| TC1800001176.mm.1 | ENSMUST00000083077 | Gm23506 | predicted gene, 23506                           | 85163077  | 85163183  | TC1100001287.mm.1 | 0.0 | 0.929886 |
| TC1800001181.mm.1 | ENSMUST00000104866 | Mir4661 | microRNA 4661                                   | 10516097  | 10516217  | TC0200000201.mm.1 | 0.0 | 0.929985 |
| TC1800001186.mm.1 | ENSMUST00000184176 | Metazoa | Metazoan signal recognition particle RNA        | 115750366 | 115750615 | TC0600002959.mm.1 | 0.0 | 0.930622 |
| TC1800001197.mm.1 | ENSMUST00000104017 | Gm25611 | predicted gene, 25611                           | 35759933  | 35760065  | TC1900001433.mm.1 | 0.0 | 0.930784 |
| TC1800001198.mm.1 | ENSMUST00000181011 | Gm11395 | predicted gene 11395                            | 33741240  | 33742038  | TC1300000379.mm.1 | 0.0 | 0.930838 |
| TC1800001200.mm.1 | NM_001190461       | Hilpda  | hypoxia inducible lipid droplet associated      | 29272488  | 29275449  | TC0600000226.mm.1 | 0.0 | 0.930883 |
| TC1800001222.mm.1 | ENSMUST00000104268 | Gm22927 | predicted gene, 22927                           | 71848076  | 71848206  | TC1100003134.mm.1 | 0.0 | 0.931082 |
| TC1800001227.mm.1 | NM_144856          | Slc22a7 | solute carrier family 22 (organic anion transpo | 46432183  | 46438477  | TC1700002175.mm.1 | 0.0 | 0.93115  |
| TC1800001234.mm.1 | ENSMUST00000158204 | Gm25227 | predicted gene, 25227                           | 15685935  | 15686046  | TC0100001992.mm.1 | 0.0 | 0.931386 |
| TC1800001235.mm.1 | ENSMUST00000157168 | Gm25967 | predicted gene, 25967                           | 35722087  | 35722233  | TC1600001554.mm.1 | 0.0 | 0.931473 |
| TC1800001246.mm.1 | ENSMUST00000157555 | Gm22218 | predicted gene, 22218                           | 56852830  | 56852888  | TC1400002136.mm.1 | 0.0 | 0.931548 |
| TC1800001255.mm.1 | ENSMUST00000179656 | Gm22631 | predicted gene, 22631                           | 59781780  | 59781873  | TC0700003311.mm.1 | 0.0 | 0.931623 |
| TC1800001266.mm.1 | NM_145577          | Zfp772  | zinc finger protein 772                         | 7202122   | 7209998   | TC0700002223.mm.1 | 0.0 | 0.931752 |
| TC1800001270.mm.1 | NM_146821          | Olfr629 | olfactory receptor 629                          | 103740201 | 103741322 | TC0700003903.mm.1 | 0.0 | 0.931852 |
| TC1800001274.mm.1 | XM_001480781       | Gm4553  | predicted gene 4553                             | 142164696 | 142167022 | TC0700004556.mm.1 | 0.0 | 0.931871 |
| TC1800001280.mm.1 | ENSMUST00000182830 | Gm8513  | predicted gene 8513                             | 45186534  | 45187536  | TC1300001907.mm.1 | 0.0 | 0.932178 |
| TC1800001285.mm.1 | NM_007498          | Atf3    | activating transcription factor 3               | 191170296 | 191218039 | TC0100003804.mm.1 | 0.0 | 0.932654 |
| TC1800001307.mm.1 | NM_173377          | Svs3b   | seminal vesicle secretory protein 3B            | 164254363 | 164256643 | TC0200005110.mm.1 | 0.0 | 0.932893 |
| TC1800001311.mm.1 | NM_001039048       | Trim63  | tripartite motif-containing 63                  | 134315120 | 134329629 | TC0400001631.mm.1 | 0.0 | 0.933151 |
| TC1800001326.mm.1 | ENSMUST00000120559 | Gm8668  | predicted gene 8668                             | 37421248  | 37422694  | TC1500000280.mm.1 | 0.0 | 0.933191 |
| TC1800001327.mm.1 | NR_037235          | Mir3074 | microRNA 3074-1                                 | 63301180  | 63301296  | TC1300002183.mm.1 | 0.0 | 0.933422 |
| TC1800001328.mm.1 | NM_007687          | Cfil1   | cofilin 1, non-muscle                           | 5490455   | 5494033   | TC1900000073.mm.1 | 0.0 | 0.933504 |
| TC1800001331.mm.1 | NM_026964          | Cdc124  | coiled-coil domain containing 124               | 70868226  | 70873490  | TC0800002410.mm.1 | 0.0 | 0.933792 |
| TC1800001336.mm.1 | ENSMUST00000122651 | Gm22201 | predicted gene, 22201                           | 32389011  | 32389069  | TC1700000559.mm.1 | 0.0 | 0.933847 |
| TC1800001338.mm.1 | ENSMUST00000082420 | mt-Te   | mitochondrially encoded tRNA glutamic acid      | 14071     | 14139     | TC0M00000028.mm.1 | 0.0 | 0.934195 |
| TC1800001352.mm.1 | NM_001199336       | Scgb2b1 | secretoglobulin, family 2B, member 19           | 33278366  | 33280341  | TC0700002810.mm.1 | 0.0 | 0.934424 |
| TC1800001359.mm.1 | XM_001472207       | Gm2046  | predicted gene 2046                             | 87973528  | 87980224  | TC1200000888.mm.1 | 0.0 | 0.934548 |
| TC1800001390.mm.1 | ENSMUST00000118323 | Gm11936 | predicted gene 11936                            | 32655929  | 32656088  | TC0800002365.mm.1 | 0.0 | 0.934554 |
| TC1800001396.mm.1 | NM_025521          | 2310011 | RIKEN cDNA 2310011J03 gene                      | 80318254  | 80320548  | TC1000002495.mm.1 | 0.0 | 0.934641 |
| TC1800001407.mm.1 | NM_025450          | Mrps17  | mitochondrial ribosomal protein S17             | 129715497 | 129718875 | TC0500001508.mm.1 | 0.0 | 0.934776 |
| TC1800001414.mm.1 | NM_013852          | Abcf3   | ATP-binding cassette, sub-family F (GCN20), mer | 20548577  | 20561603  | TC1600000280.mm.1 | 0.0 | 0.935007 |
| TC1800001416.mm.1 | ENSMUST00000093682 | n-R5s58 | nuclear encoded rRNA 5S 58                      | 53046708  | 53046826  | TC1200001736.mm.1 | 0.0 | 0.935472 |
| TC1800001428.mm.1 | NM_019511          | Ramp3   | receptor (calcitonin) activity modifying protei | 6658521   | 6677479   | TC1100000106.mm.1 | 0.0 | 0.935474 |
| TC1800001429.mm.1 | NM_028075          | Tnfrsf1 | tumor necrosis factor receptor superfamily, men | 82221744  | 82224339  | TC1500001939.mm.1 | 0.0 | 0.935723 |
| TC1800001431.mm.1 | ENSMUST00000083264 | Gm23462 | predicted gene, 23462                           | 149074003 | 149074106 | TC0600003479.mm.1 | 0.0 | 0.935724 |
| TC1800001437.mm.1 | NR_037311          | Mir3473 | microRNA 3473                                   | 162874918 | 162874995 | TC0X00003314.mm.1 | 0.0 | 0.935741 |

|                   |                    |         |                                                 |           |           |                   |      |          |
|-------------------|--------------------|---------|-------------------------------------------------|-----------|-----------|-------------------|------|----------|
| TC1800001441.mm.1 | NM_001199967       | Gm11127 | predicted gene 11127                            | 36055816  | 36058371  | TC1700001996.mm.1 | 0.0  | 0.935753 |
| TC1800001453.mm.1 | XM_486246          | Gm5620  | tubulin, alpha 1B pseudogene                    | 91097148  | 91098662  | TC0900001162.mm.1 | 0.0  | 0.935962 |
| TC1800001454.mm.1 | ENSMUST00000082679 | Gm24621 | predicted gene, 24621                           | 129458351 | 129458490 | TC0400001522.mm.1 | 0.0  | 0.935985 |
| TC1800001463.mm.1 | ENSMUST00000083134 | n-R5s5  | nuclear encoded rRNA 5S 5                       | 18323444  | 18323562  | TC0X00001907.mm.1 | 0.0  | 0.9361   |
| TC1800001466.mm.1 | NR_030570          | Mir466h | microRNA 466h                                   | 81476309  | 81487013  | TC0400002921.mm.1 | 0.0  | 0.936176 |
| TC1800001483.mm.1 | ENSMUST00000181990 | Gm4823  | predicted gene 4823                             | 3745892   | 3746875   | TC1500001143.mm.1 | 0.0  | 0.936189 |
| TC1800001498.mm.1 | NM_053227          | Vmn1r44 | vomeronasal 1 receptor 44                       | 89893177  | 89894284  | TC0600001055.mm.1 | 0.0  | 0.936278 |
| TC1800001500.mm.1 | ENSMUST00000158738 | Gm23821 | predicted gene, 23821                           | 186123201 | 186123306 | TC0100001793.mm.1 | 0.0  | 0.936616 |
| TC1800001531.mm.1 | NM_146383          | Olfr460 | olfactory receptor 460                          | 40571357  | 40572417  | TC0600000415.mm.1 | 0.0  | 0.936757 |
| TC1800001539.mm.1 | ENSMUST00000103773 | Gm23251 | predicted gene, 23251                           | 75757259  | 75757368  | TC0700003529.mm.1 | 0.0  | 0.937    |
| TC1800001541.mm.1 | ENSMUST00000182525 | Gm5430  | predicted gene 5430                             | 25326612  | 25327526  | TC1700001659.mm.1 | 0.0  | 0.937331 |
| TC1800001572.mm.1 | ENSMUST00000167618 | Gm17304 | predicted gene, 17304                           | 106609098 | 106609201 | TC0500001062.mm.1 | 0.0  | 0.937408 |
| TC1800001576.mm.1 | ENSMUST00000158298 | Gm24295 | predicted gene, 24295                           | 82050751  | 82050881  | TC1300000970.mm.1 | 0.0  | 0.937517 |
| TC1800001587.mm.1 | ENSMUST00000174914 | Gm25238 | predicted gene, 25238                           | 60580529  | 60580617  | TC1900000861.mm.1 | 0.0  | 0.937519 |
| TC1800001590.mm.1 | NM_173013          | Map1s   | microtubule-associated protein 1S               | 70905932  | 70917529  | TC0800000773.mm.1 | 0.0  | 0.937527 |
| TC1800001591.mm.1 | NM_172573          | Engase  | endo-beta-N-acetylglucosaminidase               | 118476829 | 118489209 | TC1100001989.mm.1 | 0.0  | 0.937831 |
| TC1800001593.mm.1 | NM_138659          | Prpf8   | pre-mRNA processing factor 8                    | 75486777  | 75509449  | TC100001069.mm.1  | 0.0  | 0.937879 |
| TC1800001594.mm.1 | NM_144857          | Rrp36   | ribosomal RNA processing 36 homolog (S. cerevi  | 46667442  | 46674255  | TC1700002184.mm.1 | 0.0  | 0.937968 |
| TC1800001597.mm.1 | ENSMUST00000158085 | Gm22730 | predicted gene, 22730                           | 127046912 | 127047082 | TC0800001585.mm.1 | 0.0  | 0.938223 |
| TC1800001628.mm.1 | ENSMUST00000083733 | Gm22576 | predicted gene, 22576                           | 48942999  | 48943102  | TC1600001693.mm.1 | 0.0  | 0.938257 |
| TC1800001629.mm.1 | ENSMUST00000158665 | Gm23207 | predicted gene, 23207                           | 23817270  | 23817371  | TC1800001070.mm.1 | 0.0  | 0.938283 |
| TC1800001632.mm.1 | ENSMUST00000176615 | Gm25193 | predicted gene, 25193                           | 120797574 | 120797670 | TC0600003046.mm.1 | 0.0  | 0.938486 |
| TC1800001648.mm.1 | NM_001134644_4     | Mup19   | major urinary protein 19                        | 61778324  | 61782269  | TC0400002770.mm.1 | -0.1 | 0.938637 |
| TC1800001649.mm.1 | NM_022980          | Rcan3   | regulator of calcineurin 3                      | 135412308 | 135433853 | TC0400003765.mm.1 | 0.0  | 0.938875 |
| TC1800001654.mm.1 | NM_183162          | Helz2   | helicase with zinc finger 2, transcriptional co | 181227615 | 181242027 | TC0200005438.mm.1 | 0.0  | 0.939088 |
| TC1800001669.mm.1 | NM_007551          | Cxcr5   | chemokine (C-X-C motif) receptor 5              | 44511787  | 44556391  | TC0900002171.mm.1 | 0.0  | 0.939106 |
| TC1800001681.mm.1 | NR_073181          | Fth1    | ferritin heavy chain 1                          | 9980600   | 9985111   | TC1900000183.mm.1 | 0.0  | 0.939285 |
| TC1800001700.mm.1 | OTTMUST00000054980 | AC13906 | ---                                             | 27949155  | 27949763  | TC0700002682.mm.1 | 0.0  | 0.939635 |
| TC1800001711.mm.1 | NM_146533          | Olfr136 | olfactory receptor 1367                         | 21346910  | 21347964  | TC1300000163.mm.1 | 0.0  | 0.939667 |
| TC1800001716.mm.1 | ENSMUST00000179835 | Gm24264 | predicted gene, 24264                           | 59698307  | 59698400  | TC0700003278.mm.1 | 0.0  | 0.939703 |
| TC1800001719.mm.1 | NR_030470          | Mir669a | microRNA 669a-2                                 | 10510164  | 10510260  | TC0200000188.mm.1 | 0.0  | 0.939799 |
| TC1800001725.mm.1 | ENSMUST00000083097 | Gm22364 | predicted gene, 22364                           | 36409610  | 36409707  | TC0X00002045.mm.1 | 0.0  | 0.940241 |
| TC1800001736.mm.1 | ENSMUST00000122566 | Gm22479 | predicted gene, 22479                           | 118466984 | 118467064 | TC0900003225.mm.1 | 0.0  | 0.940391 |
| TC1800001741.mm.1 | ENSMUST00000175187 | Gm24563 | predicted gene, 24563                           | 48048703  | 48048795  | TC0600000546.mm.1 | 0.0  | 0.940888 |
| TC1800001746.mm.1 | NM_026113          | Gtf3c6  | general transcription factor IIIC, polypeptide  | 40249203  | 40257671  | TC1000002042.mm.1 | 0.0  | 0.940904 |
| TC1800001747.mm.1 | NM_022012          | Map3k11 | mitogen-activated protein kinase kinase kinase  | 5689131   | 5702865   | TC1900000079.mm.1 | 0.0  | 0.941033 |
| TC1800001748.mm.1 | NM_011220          | Pts     | 6-pyruvoyl-tetrahydropterin synthase            | 50521617  | 50528641  | TC0900002268.mm.1 | 0.0  | 0.941098 |
| TC1900000008.mm.1 | NM_001166724       | Vmn1r16 | vomeronasal 1 receptor 160                      | 22871224  | 22872147  | TC0700000345.mm.1 | 0.0  | 0.941305 |
| TC1900000012.mm.1 | NM_001113358       | Dad1    | defender against cell death 1                   | 54235479  | 54254104  | TC1400002050.mm.1 | 0.0  | 0.941434 |
| TC1900000015.mm.1 | NM_022776          | Cdc16   | CDC16 cell division cycle 16                    | 13757676  | 13781938  | TC0800000130.mm.1 | 0.0  | 0.941498 |
| TC1900000019.mm.1 | NM_026979          | C1qtnf2 | C1q and tumor necrosis factor related protein 2 | 43474276  | 43491525  | TC1100000427.mm.1 | 0.0  | 0.941516 |
| TC1900000021.mm.1 | ENSMUST00000082542 | Gm23405 | predicted gene, 23405                           | 150964735 | 150964894 | TC0400001993.mm.1 | 0.0  | 0.941652 |
| TC1900000022.mm.1 | NM_024478          | Grpel1  | GrpE-like 1, mitochondrial                      | 36464998  | 36474080  | TC0500000409.mm.1 | 0.0  | 0.941696 |
| TC1900000026.mm.1 | NM_030558          | Car15   | carbonic anhydrase 15                           | 17835276  | 17838364  | TC1600002180.mm.1 | 0.0  | 0.941735 |
| TC1900000028.mm.1 | ENSMUST00000083364 | Gm26121 | predicted gene, 26121                           | 72881792  | 72881953  | TC1100001008.mm.1 | 0.0  | 0.942014 |
| TC1900000033.mm.1 | ENSMUST00000179760 | Gm21887 | predicted gene, 21887                           | 170009659 | 170019281 | TC0X00001715.mm.1 | 0.0  | 0.942033 |
| TC1900000035.mm.1 | ENSMUST00000104479 | Gm26147 | predicted gene, 26147                           | 118832565 | 118832678 | TC0700001705.mm.1 | 0.0  | 0.942167 |
| TC1900000036.mm.1 | ENSMUST00000179715 | AC16897 | N/A                                             | 31113     | 45006     | TC1_GL456212_rand | 0.0  | 0.942182 |
| TC1900000046.mm.1 | NM_145964          | Ap1ar   | adaptor-related protein complex 1 associated re | 127807264 | 127837492 | TC0300002916.mm.1 | 0.0  | 0.942262 |
| TC1900000050.mm.1 | ENSMUST00000104530 | Gm25723 | predicted gene, 25723                           | 52946804  | 52946929  | TC1600001732.mm.1 | 0.0  | 0.942268 |
| TC1900000051.mm.1 | NM_011662          | Tyropb  | TYRO protein tyrosine kinase binding protein    | 30413788  | 30417582  | TC0700000561.mm.1 | 0.0  | 0.942682 |
| TC1900000052.mm.1 | ENSMUST00000178366 | CAA010  | N/A                                             | 6884      | 13382     | TCUn_GL4563720000 | 0.0  | 0.942787 |
| TC1900000055.mm.1 | NM_028747          | 610012  | RIKEN cDNA 0610012H03 gene                      | 105224320 | 105379860 | TC0200001579.mm.1 | 0.0  | 0.942867 |
| TC1900000056.mm.1 | NM_026686          | 610011  | RIKEN cDNA 0610011F06 gene                      | 25875464  | 25886007  | TC1700000394.mm.1 | 0.0  | 0.943173 |
| TC1900000065.mm.1 | ENSMUST00000082654 | n-R5s74 | nuclear encoded rRNA 5S 74                      | 116326602 | 116326717 | TC1100004114.mm.1 | 0.0  | 0.943205 |
| TC1900000066.mm.1 | NM_130453          | Gpha2   | glycoprotein hormone alpha 2                    | 6226380   | 6227768   | TC1900000106.mm.1 | 0.0  | 0.943427 |
| TC1900000069.mm.1 | ENSMUST00000104556 | Gm26343 | predicted gene, 26343                           | 86275232  | 86275362  | TC0300002266.mm.1 | 0.0  | 0.943571 |
| TC1900000073.mm.1 | ENSMUST00000122556 | Gm25322 | predicted gene, 25322                           | 119530211 | 119530314 | TC0100001077.mm.1 | 0.0  | 0.943664 |
| TC1900000075.mm.1 | NM_007976          | F5      | coagulation factor V                            | 164151838 | 164220277 | TC0100001498.mm.1 | 0.0  | 0.94377  |
| TC1900000078.mm.1 | NM_001033908       | Med22   | mediator complex subunit 22                     | 26905262  | 26910677  | TC0200003203.mm.1 | 0.0  | 0.943799 |
| TC1900000079.mm.1 | NM_146226          | Apeh    | acylpeptide hydrolase                           | 108085413 | 108094480 | TC0900003051.mm.1 | 0.0  | 0.943823 |
| TC1900000082.mm.1 | ENSMUST00000184154 | mmu-mir | mmu-mir-7651                                    | 6401630   | 6401693   | TC1100000095.mm.1 | 0.0  | 0.943901 |
| TC1900000089.mm.1 | NR_106109          | Mir7651 | microRNA mir-7651 (Mir7651), microRNA.          | 0         | 0         | TSUnmapped0000011 | 0.0  | 0.943901 |
| TC1900000090.mm.1 | ENSMUST00000157286 | Gm24913 | predicted gene, 24913                           | 132931211 | 132931317 | TC0400003688.mm.1 | 0.0  | 0.944064 |
| TC1900000094.mm.1 | NM_172620          | Vps52   | vacuolar protein sorting 52 (yeast)             | 33955812  | 33966984  | TC1700000604.mm.1 | 0.0  | 0.944116 |
| TC1900000096.mm.1 | ENSMUST00000082530 | Gm25078 | predicted gene, 25078                           | 45795361  | 45795467  | TC0X00002142.mm.1 | 0.0  | 0.944268 |
| TC1900000097.mm.1 | ENSMUST00000183730 | AC12178 | N/A                                             | 109728821 | 109728943 | TC1200001190.mm.1 | 0.0  | 0.9446   |
| TC1900000103.mm.1 | ENSMUST00000121675 | Gm14672 | predicted gene 14672                            | 65194669  | 65195115  | TC0X00002338.mm.1 | 0.0  | 0.944675 |
| TC1900000104.mm.1 | XM_001480563       | Gm4425  | predicted gene 4425                             | 22115756  | 22156646  | TC1200001500.mm.1 | 0.0  | 0.94479  |
| TC1900000106.mm.1 | NM_011927          | Ceacam9 | carcinoembryonic antigen-related cell adhesion  | 16721929  | 16726110  | TC0700000233.mm.1 | 0.0  | 0.944805 |
| TC1900000109.mm.1 | ENSMUST00000175535 | Gm26237 | predicted gene, 26237                           | 72684314  | 72684438  | TC0800000832.mm.1 | 0.0  | 0.944813 |
| TC1900000111.mm.1 | ENSMUST00000157743 | Gm26323 | predicted gene, 26323                           | 23823053  | 23823227  | TC0200000371.mm.1 | 0.0  | 0.944823 |
| TC1900000112.mm.1 | ENSMUST00000119851 | Gm14111 | predicted gene 14111                            | 146754707 | 146755705 | TC0200004786.mm.1 | 0.0  | 0.944846 |
| TC1900000113.mm.1 | ENSMUST00000083043 | Gm26056 | predicted gene, 26056                           | 14778669  | 14778772  | TC0700000181.mm.1 | 0.0  | 0.944942 |
| TC1900000115.mm.1 | NM_001206661       | Tmem200 | transmembrane protein 200C                      | 68837136  | 68843138  | TC1700001101.mm.1 | 0.0  | 0.945084 |
| TC1900000117.mm.1 | NM_001161516       | Dctd    | dCMP deaminase                                  | 48099092  | 48153233  | TC0800000564.mm.1 | 0.0  | 0.94533  |
| TC1900000121.mm.1 | NM_010005          | Cyp2d10 | cytochrome P450, family 2, subfamily d, polypep | 82402846  | 82407194  | TC1500001946.mm.1 | 0.0  | 0.945355 |
| TC1900000127.mm.1 | ENSMUST00000157707 | Gm22847 | predicted gene, 22847                           | 34530649  | 34530753  | TC0500000379.mm.1 | 0.0  | 0.945716 |

|                   |                    |         |                                                   |           |           |                    |     |          |
|-------------------|--------------------|---------|---------------------------------------------------|-----------|-----------|--------------------|-----|----------|
| TC1900000130.mm.1 | NM_027159          | Ccdc115 | coiled-coil domain containing 115                 | 34436670  | 34439672  | TC0100002151.mm.1  | 0.0 | 0.945819 |
| TC1900000132.mm.1 | NM_007854          | Slc29a2 | solute carrier family 29 (nucleoside transporte   | 5023860   | 5031972   | TC1900000051.mm.1  | 0.0 | 0.946115 |
| TC1900000133.mm.1 | NM_183150          | BC00396 | cDNA sequence BC003965                            | 25184561  | 25187662  | TC1700000365.mm.1  | 0.0 | 0.946122 |
| TC1900000134.mm.1 | NM_133209          | Pilrb1  | paired immunoglobulin-like type 2 receptor beta 1 | 137852147 | 137858049 | TC0500003464.mm.1  | 0.0 | 0.946243 |
| TC1900000137.mm.1 | NM_028754          | 610037  | RIKEN cDNA 0610037L13 gene                        | 107889813 | 107899384 | TC0400001137.mm.1  | 0.0 | 0.946307 |
| TC1900000139.mm.1 | ENSMUST00000118417 | Gm14130 | predicted gene 14130                              | 149743175 | 149744161 | TC02000002211.mm.1 | 0.0 | 0.946461 |
| TC1900000143.mm.1 | ENSMUST00000178368 | Gm25596 | predicted gene, 25596                             | 29349585  | 29349691  | TC1000000266.mm.1  | 0.0 | 0.946579 |
| TC1900000148.mm.1 | NM_001101613       | Gm11567 | predicted gene 11567                              | 99879187  | 99880229  | TC1100001607.mm.1  | 0.0 | 0.946609 |
| TC1900000149.mm.1 | ENSMUST00000182438 | Gm27039 | predicted gene, 27039                             | 92527273  | 92528510  | TC1700002749.mm.1  | 0.0 | 0.946925 |
| TC1900000152.mm.1 | NM_175158          | Utp20   | UTP20, small subunit (SSU) processome compon      | 88746607  | 88826814  | TC1000002650.mm.1  | 0.0 | 0.947092 |
| TC1900000156.mm.1 | ENSMUST00000179544 | Gm21954 | predicted gene, 21954                             | 55461985  | 55472210  | TC0300001996.mm.1  | 0.0 | 0.94739  |
| TC1900000158.mm.1 | NM_001146323       | Hps3    | Hermansky-Pudlak syndrome 3 homolog (humar        | 19995945  | 20035315  | TC0300001701.mm.1  | 0.0 | 0.947447 |
| TC1900000162.mm.1 | NM_183268          | Defa20  | defensin, alpha, 20                               | 21509256  | 21510237  | TC0800000242.mm.1  | 0.0 | 0.947599 |
| TC1900000164.mm.1 | NR_029576          | Mir190  | microRNA 190                                      | 67236651  | 67236735  | TC0900002543.mm.1  | 0.0 | 0.947779 |
| TC1900000165.mm.1 | NM_001081011       | Srgap2  | SLIT-ROBO Rho GTPase activating protein 2         | 131285251 | 131527361 | TC0100003058.mm.1  | 0.0 | 0.948116 |
| TC1900000166.mm.1 | ENSMUST00000158139 | Gm24395 | predicted gene, 24395                             | 153864807 | 153864931 | TC0300001548.mm.1  | 0.0 | 0.948397 |
| TC1900000167.mm.1 | ENSMUST00000174902 | Gm23562 | predicted gene, 23562                             | 46434808  | 46434869  | TC1500001476.mm.1  | 0.0 | 0.948522 |
| TC1900000169.mm.1 | ENSMUST00000157847 | Gm23079 | predicted gene, 23079                             | 123808105 | 123808221 | TC0600003092.mm.1  | 0.0 | 0.948564 |
| TC1900000174.mm.1 | NM_020050          | Tmem9b  | TMEM9 domain family, member B                     | 109735834 | 109752875 | TC0700004080.mm.1  | 0.0 | 0.948862 |
| TC1900000175.mm.1 | ENSMUST00000082475 | n-R5s40 | nuclear encoded rRNA 5S 40                        | 79692502  | 79692625  | TC1500000680.mm.1  | 0.0 | 0.948952 |
| TC1900000176.mm.1 | NR_045443          | 1700019 | RIKEN cDNA 1700019B21 gene                        | 62510539  | 62527011  | TC0X00002323.mm.1  | 0.0 | 0.949124 |
| TC1900000178.mm.1 | NR_024202          | Rny3    | RNA, Y3 small cytoplasmic (associated with Ro p   | 47781624  | 47781725  | TC0600000536.mm.1  | 0.0 | 0.949283 |
| TC1900000180.mm.1 | NR_024202          | Rny3    | RNA, Y3 small cytoplasmic (associated with Ro p   | 0         | 0         | TSUnmapped0000018  | 0.0 | 0.949283 |
| TC1900000183.mm.1 | NM_025693          | Tmem41a | transmembrane protein 41a                         | 21934326  | 21947552  | TC1600001373.mm.1  | 0.0 | 0.949443 |
| TC1900000186.mm.1 | ENSMUST00000177270 | Gm25442 | predicted gene, 25442                             | 35325614  | 35325705  | TC0300000255.mm.1  | 0.0 | 0.949516 |
| TC1900000188.mm.1 | NR_036665          | Ship1   | schwannomin interacting protein 1                 | 68064802  | 68626482  | TC03000003210.mm.1 | 0.0 | 0.949616 |
| TC1900000205.mm.1 | ENSMUST00000120200 | Gm11557 | predicted gene 11557                              | 99679133  | 99679133  | TC1100001598.mm.1  | 0.0 | 0.949981 |
| TC1900000208.mm.1 | NM_010001          | Cyp2c37 | cytochrome P450, family 2. subfamily c, polypep   | 39992424  | 40012244  | TC1900000567.mm.1  | 0.0 | 0.950409 |
| TC1900000216.mm.1 | NM_011161          | Mapk11  | mitogen-activated protein kinase 11               | 89142482  | 89149606  | TC1500002039.mm.1  | 0.0 | 0.95061  |
| TC1900000217.mm.1 | NM_001165951       | Vangl1  | vang-like 1 (van gogh, Drosophila)                | 102155900 | 102204693 | TC03000002612.mm.1 | 0.0 | 0.950896 |
| TC1900000221.mm.1 | NM_028453          | Otud3   | OTU domain containing 3                           | 138895379 | 138913947 | TC0400003836.mm.1  | 0.0 | 0.95111  |
| TC1900000224.mm.1 | ENSMUST00000183495 | Six3os1 | Six3os1 conserved region 6                        | 85618067  | 85618265  | TC1700001283.mm.1  | 0.0 | 0.951116 |
| TC1900000226.mm.1 | NM_053106          | Lmod1   | leiomodlin 1 (smooth muscle)                      | 135324807 | 135368065 | TC0100001249.mm.1  | 0.0 | 0.951296 |
| TC1900000227.mm.1 | NM_025496          | Cdrt4   | CMT1A duplicated region transcript 4              | 62951193  | 62993095  | TC1100000820.mm.1  | 0.0 | 0.951548 |
| TC1900000228.mm.1 | NM_207573          | Olfr138 | olfactory receptor 1380                           | 49563923  | 49564860  | TC1100000518.mm.1  | 0.0 | 0.951572 |
| TC1900000229.mm.1 | ENSMUST00000104242 | Gm22592 | predicted gene, 22592                             | 21500366  | 21500496  | TC0X00001944.mm.1  | 0.0 | 0.951666 |
| TC1900000235.mm.1 | ENSMUST00000083824 | n-R5s10 | nuclear encoded rRNA 5S 10                        | 86406128  | 86406246  | TC0X00002568.mm.1  | 0.0 | 0.951723 |
| TC1900000238.mm.1 | NM_018773          | Skap2   | src family associated phosphoprotein 2            | 51859165  | 52012549  | TC0600002269.mm.1  | 0.0 | 0.951744 |
| TC1900000246.mm.1 | NM_001190732       | Gm20594 | predicted gene, 20594                             | 79818031  | 79818364  | TC0600000884.mm.1  | 0.0 | 0.952544 |
| TC1900000256.mm.1 | NM_001011662       | Olfr180 | olfactory receptor 180                            | 58915686  | 58918486  | TC1600001784.mm.1  | 0.0 | 0.952662 |
| TC1900000257.mm.1 | NM_001013376       | Rpp38   | ribonuclease P/MRP 38 subunit                     | 33328949  | 3332643   | TC0200002844.mm.1  | 0.0 | 0.952883 |
| TC1900000258.mm.1 | ENSMUST00000175289 | Gm23632 | predicted gene, 23632                             | 120974301 | 120974425 | TC1000003036.mm.1  | 0.0 | 0.952884 |
| TC1900000271.mm.1 | ENSMUST00000122639 | n-R5s68 | nuclear encoded rRNA 5S 68                        | 27085126  | 27085207  | TC1100000271.mm.1  | 0.0 | 0.952991 |
| TC1900000293.mm.1 | NM_021502          | Trappc2 | trafficking protein particle complex 2-like       | 122611626 | 122615591 | TC0800001494.mm.1  | 0.0 | 0.953004 |
| TC1900000304.mm.1 | ENSMUST00000104101 | Gm25766 | predicted gene, 25766                             | 113519476 | 113519606 | TC0800002968.mm.1  | 0.0 | 0.95308  |
| TC1900000309.mm.1 | NM_001024602       | Cep170b | centrosomal protein 170B                          | 112722174 | 112746591 | TC1200001269.mm.1  | 0.0 | 0.953101 |
| TC1900000317.mm.1 | ENSMUST00000179217 | Gm2310  | predicted gene 2310                               | 8518683   | 8519953   | TC1500001181.mm.1  | 0.0 | 0.953114 |
| TC1900000318.mm.1 | NM_025448          | Ssr2    | signal sequence receptor, beta                    | 88579641  | 88588416  | TC0300000731.mm.1  | 0.0 | 0.953136 |
| TC1900000325.mm.1 | ENSMUST00000158427 | Gm23351 | predicted gene, 23351                             | 31427255  | 31427379  | TC1300000346.mm.1  | 0.0 | 0.953394 |
| TC1900000326.mm.1 | ENSMUST00000119524 | Gm16074 | predicted gene 16074                              | 3992371   | 3992814   | TC1000000016.mm.1  | 0.0 | 0.953507 |
| TC1900000328.mm.1 | ENSMUST00000157420 | Gm23327 | predicted gene, 23327                             | 30004186  | 30004263  | TC1500001315.mm.1  | 0.0 | 0.953516 |
| TC1900000335.mm.1 | ENSMUST00000175531 | Gm22355 | predicted gene, 22355                             | 167644364 | 167644459 | TC0200005195.mm.1  | 0.0 | 0.953608 |
| TC1900000373.mm.1 | BC026878           | Gm3912  | predicted gene 3912                               | 7366496   | 7374636   | TC0700002230.mm.1  | 0.0 | 0.953625 |
| TC1900000377.mm.1 | NM_133869          | Cept1   | choline/ethanolaminephosphotransferase 1          | 106502260 | 106547802 | TC0300002688.mm.1  | 0.0 | 0.953682 |
| TC1900000378.mm.1 | NM_177406          | Cyp4a12 | cytochrome P450, family 4, subfamily a, polypep   | 115299046 | 115332815 | TC0400001221.mm.1  | 0.0 | 0.953928 |
| TC1900000379.mm.1 | ENSMUST00000166353 | Gm17402 | predicted gene, 17402                             | 67365461  | 67375163  | TC03000002112.mm.1 | 0.0 | 0.954455 |
| TC1900000381.mm.1 | NM_001146346       | Emp3    | epithelial membrane protein 3                     | 45918023  | 45921426  | TC0700003028.mm.1  | 0.0 | 0.954475 |
| TC1900000382.mm.1 | NM_011948          | Map3k4  | mitogen-activated protein kinase kinase kinase    | 12227621  | 12318660  | TC1700001447.mm.1  | 0.0 | 0.954635 |
| TC1900000383.mm.1 | NM_001025084       | Rhox1   | reproductive homeobox 1                           | 37213804  | 37222258  | TC0X00002063.mm.1  | 0.0 | 0.955449 |
| TC1900000397.mm.1 | XM_003085242       | Gm340   | predicted gene 340                                | 41575867  | 41586536  | TC1900000591.mm.1  | 0.0 | 0.955521 |
| TC1900000398.mm.1 | NM_001045528       | Fkbp15  | FK506 binding protein 15                          | 62300342  | 62360548  | TC0400002786.mm.1  | 0.0 | 0.955611 |
| TC1900000401.mm.1 | ENSMUST00000104640 | Gm26050 | predicted gene, 26050                             | 3699178   | 3699240   | TC1200000015.mm.1  | 0.0 | 0.955687 |
| TC1900000407.mm.1 | NR_028499          | Fxyd2   | FXD domain-containing ion transport regulator     | 45399709  | 45410278  | TC0900000541.mm.1  | 0.0 | 0.955785 |
| TC1900000421.mm.1 | NM_009344          | Phlda1  | pleckstrin homology-like domain, family A, mem    | 111506286 | 111508649 | TC1000001301.mm.1  | 0.0 | 0.956168 |
| TC1900000427.mm.1 | NM_178098          | 4930486 | RIKEN cDNA 4930486L24 gene                        | 60842612  | 60844416  | TC1300002140.mm.1  | 0.0 | 0.956289 |
| TC1900000432.mm.1 | NM_178612          | Cnpy4   | canopy 4 homolog (zebrafish)                      | 138187485 | 138193918 | TC0500001645.mm.1  | 0.0 | 0.956808 |
| TC1900000438.mm.1 | ENSMUST00000083221 | Gm25481 | predicted gene, 25481                             | 9317819   | 9317976   | TC0X00000112.mm.1  | 0.0 | 0.956876 |
| TC1900000454.mm.1 | ENSMUST00000085094 | Gm10160 | predicted gene 10160                              | 81855533  | 81855794  | TC0700003620.mm.1  | 0.0 | 0.956879 |
| TC1900000460.mm.1 | NM_001033157       | 5730507 | RIKEN cDNA 5730507C01 gene                        | 18514510  | 18535254  | TC1200000155.mm.1  | 0.0 | 0.956982 |
| TC1900000461.mm.1 | NM_174991          | Bai1    | brain-specific angiogenesis inhibitor 1           | 74516196  | 74589464  | TC1000005288.mm.1  | 0.0 | 0.957258 |
| TC1900000465.mm.1 | NM_029101          | Rrp7a   | ribosomal RNA processing 7 homolog A (S. cerev    | 83113433  | 83122801  | TC1500001965.mm.1  | 0.0 | 0.957302 |
| TC1900000481.mm.1 | ENSMUST00000176507 | Gm26318 | predicted gene, 26318                             | 102255430 | 102255525 | TC0X00002740.mm.1  | 0.0 | 0.957366 |
| TC1900000485.mm.1 | NM_173434          | 9930111 | RIKEN cDNA 9930111J21 gene 2                      | 49015874  | 49051242  | TC1100002648.mm.1  | 0.0 | 0.957476 |
| TC1900000487.mm.1 | ENSMUST00000184028 | DLG2-AS | DLG2 antisense RNA 1 conserved region 1           | 91126348  | 91126555  | TC0700003730.mm.1  | 0.0 | 0.957538 |
| TC1900000492.mm.1 | NM_001166743       | Vmn1r11 | vomeroneasal 1 receptor 117                       | 20883198  | 20884121  | TC0700002530.mm.1  | 0.0 | 0.957594 |
| TC1900000495.mm.1 | NR_003623          | Gm5069  | glyceraldehyde-3-phosphate dehydrogenase pse      | 180326969 | 180330550 | TC0100003665.mm.1  | 0.0 | 0.957606 |
| TC1900000497.mm.1 | NM_009544          | Zfp105  | zinc finger protein 105                           | 122923072 | 122931028 | TC0900001650.mm.1  | 0.0 | 0.957821 |
| TC1900000498.mm.1 | XR_104786          | Gm16508 | predicted gene 16508                              | 41286061  | 41290590  | TC0300001913.mm.1  | 0.0 | 0.957968 |

|                   |                    |         |                                                  |           |           |                   |     |          |
|-------------------|--------------------|---------|--------------------------------------------------|-----------|-----------|-------------------|-----|----------|
| TC1900000501.mm.1 | ENSMUST00000083365 | Gm23138 | predicted gene, 23138                            | 108498044 | 108498146 | TC0400001148.mm.1 | 0.0 | 0.958151 |
| TC1900000502.mm.1 | NR_039556          | Mir5097 | microRNA 5097                                    | 41196449  | 41196531  | TC1800000427.mm.1 | 0.0 | 0.958373 |
| TC1900000504.mm.1 | NM_178212          | Hist2h  | histone cluster 2, H2aa2                         | 96245457  | 96246115  | TC0300003215.mm.1 | 0.0 | 0.958584 |
| TC1900000508.mm.1 | ENSMUST00000178031 | Gm22583 | predicted gene, 22583                            | 110757085 | 110757191 | TC0500001149.mm.1 | 0.0 | 0.9586   |
| TC1900000509.mm.1 | NM_013842          | Xbp1    | X-box binding protein 1                          | 5520641   | 5525993   | TC1100000072.mm.1 | 0.0 | 0.958733 |
| TC1900000523.mm.1 | NCBI_Gene:777780:p | Ighv5-6 | immunoglobulin heavy variable 5-6                | 113625506 | 113625956 | TC1200002558.mm.1 | 0.0 | 0.958744 |
| TC1900000526.mm.1 | NM_011377          | Sim2    | single-minded homolog 2 (Drosophila)             | 94085260  | 94127032  | TC1600001053.mm.1 | 0.0 | 0.958775 |
| TC1900000529.mm.1 | ENSMUST00000116872 | Gm23881 | predicted gene, 23881                            | 48364337  | 48364402  | TC1400001945.mm.1 | 0.0 | 0.959158 |
| TC1900000531.mm.1 | NM_011764          | Zfp90   | zinc finger protein 90                           | 106415339 | 106425895 | TC0800001251.mm.1 | 0.0 | 0.959261 |
| TC1900000533.mm.1 | NM_133676          | Osgp    | O-sialoglycoprotein endopeptidase                | 50906478  | 50924893  | TC1400001993.mm.1 | 0.0 | 0.959337 |
| TC1900000544.mm.1 | ENSMUST00000103894 | Gm23766 | predicted gene, 23766                            | 45095629  | 45095708  | TC1000002108.mm.1 | 0.0 | 0.959389 |
| TC1900000545.mm.1 | ENSMUST00000175076 | Gm23158 | predicted gene, 23158                            | 133558824 | 133558949 | TC0400003706.mm.1 | 0.0 | 0.959443 |
| TC1900000549.mm.1 | ENSMUST00000178926 | Gm22259 | predicted gene, 22259                            | 52154501  | 52154607  | TC1800001331.mm.1 | 0.0 | 0.959578 |
| TC1900000567.mm.1 | ENSMUST00000090720 | Gm13721 | predicted gene 13721                             | 86397068  | 86398017  | TC0200003935.mm.1 | 0.0 | 0.95983  |
| TC1900000568.mm.1 | ENSMUST00000157907 | Gm22706 | predicted gene, 22706                            | 44081289  | 44081400  | TC0400002550.mm.1 | 0.0 | 0.960052 |
| TC1900000569.mm.1 | NM_183294          | Cdk1    | cyclin-dependent kinase-like 1 (CDC2-related ki  | 69746848  | 69790707  | TC1200001875.mm.1 | 0.0 | 0.960463 |
| TC1900000574.mm.1 | ENSMUST00000122769 | n-R5s18 | nuclear encoded rRNA 5S 187                      | 81918513  | 81918623  | TC0400000820.mm.1 | 0.0 | 0.960764 |
| TC1900000583.mm.1 | NM_001122830       | Klhl26  | kelch-like 26                                    | 70450219  | 70476949  | TC0800002392.mm.1 | 0.0 | 0.961291 |
| TC1900000588.mm.1 | ENSMUST00000122007 | Gm13158 | predicted gene 13158                             | 147267373 | 147268108 | TC0400001902.mm.1 | 0.0 | 0.961465 |
| TC1900000591.mm.1 | NM_007954          | Ces1c   | carboxylesterase 1C                              | 93099015  | 93131283  | TC0800002701.mm.1 | 0.0 | 0.961821 |
| TC1900000593.mm.1 | NM_018813          | Cpsf3   | cleavage and polyadenylation specificity factor  | 21286297  | 21315056  | TC1200000181.mm.1 | 0.0 | 0.961883 |
| TC1900000598.mm.1 | NM_010387          | H2-DMb1 | histocompatibility 2, class II, locus Mb1        | 34153072  | 34160229  | TC1700002780.mm.1 | 0.0 | 0.962033 |
| TC1900000600.mm.1 | ENSMUST00000175516 | Gm25197 | predicted gene, 25197                            | 73924585  | 73924710  | TC1300002307.mm.1 | 0.0 | 0.962073 |
| TC1900000602.mm.1 | ENSMUST00000104599 | Gm23908 | predicted gene, 23908                            | 118111914 | 118112045 | TC0600002995.mm.1 | 0.0 | 0.962139 |
| TC1900000604.mm.1 | NM_133907          | Ube3c   | ubiquitin protein ligase E3C                     | 29569242  | 29676077  | TC0500000274.mm.1 | 0.0 | 0.962416 |
| TC1900000607.mm.1 | ENSMUST00000104596 | Gm23911 | predicted gene, 23911                            | 58005205  | 58005338  | TC0700000945.mm.1 | 0.0 | 0.962423 |
| TC1900000609.mm.1 | ENSMUST00000157365 | Gm25058 | predicted gene, 25058                            | 11913621  | 11913748  | TC1100002226.mm.1 | 0.0 | 0.962487 |
| TC1900000610.mm.1 | NM_053166          | Trim7   | tripartite motif-containing 7                    | 48826138  | 48852209  | TC1100000494.mm.1 | 0.0 | 0.962541 |
| TC1900000615.mm.1 | ENSMUST00000118306 | Gm12664 | predicted gene 12664                             | 16643009  | 16643921  | TC1100002242.mm.1 | 0.0 | 0.962617 |
| TC1900000625.mm.1 | ENSMUST00000119836 | Gm7278  | predicted gene 7278                              | 152729159 | 152730559 | TC0100003267.mm.1 | 0.0 | 0.962729 |
| TC1900000631.mm.1 | ENSMUST00000083817 | Gm23345 | predicted gene, 23345                            | 111947181 | 111947330 | TC0700004116.mm.1 | 0.0 | 0.962759 |
| TC1900000637.mm.1 | ENSMUST00000175051 | Gm22694 | predicted gene, 22694                            | 89733005  | 89733074  | TC0100000911.mm.1 | 0.0 | 0.962975 |
| TC1900000641.mm.1 | NM_016668          | Bhmt    | betaine-homocysteine methyltransferase           | 93616891  | 93637961  | TC1300002436.mm.1 | 0.0 | 0.963293 |
| TC1900000645.mm.1 | ENSMUST00000182456 | Gm16470 | predicted pseudogene 16470                       | 40212382  | 40213379  | TC1900000569.mm.1 | 0.0 | 0.963416 |
| TC1900000646.mm.1 | NM_022313          | Eral1   | Era (G-protein)-like 1 (E. coli)                 | 78073376  | 78080383  | TC1100003283.mm.1 | 0.0 | 0.963426 |
| TC1900000650.mm.1 | NM_016878          | Dnpep   | aspartyl aminopeptidase                          | 75307896  | 75317637  | TC0100002608.mm.1 | 0.0 | 0.963477 |
| TC1900000657.mm.1 | NM_015775          | Tmprss2 | transmembrane protease, serine 2                 | 97564682  | 97611195  | TC1600002152.mm.1 | 0.0 | 0.963541 |
| TC1900000660.mm.1 | ENSMUST00000179058 | Gm23306 | predicted gene, 23306                            | 36285433  | 36285537  | TC1600001570.mm.1 | 0.0 | 0.963876 |
| TC1900000661.mm.1 | XM_003689027       | Gm21387 | predicted gene, 21387                            | 51605778  | 51607974  | TC0Y00000363.mm.1 | 0.0 | 0.963892 |
| TC1900000662.mm.1 | XM_001476100       | Gm20882 | predicted gene, 20882                            | 64227042  | 64229238  | TC0Y00000422.mm.1 | 0.0 | 0.963892 |
| TC1900000664.mm.1 | ENSMUST00000117402 | Gm7129  | predicted gene 7129                              | 13326023  | 13327019  | TC0400001870.mm.1 | 0.0 | 0.964331 |
| TC1900000683.mm.1 | NM_013637          | Prrm1   | protamine 1                                      | 10796326  | 10796886  | TC1600001203.mm.1 | 0.0 | 0.96463  |
| TC1900000689.mm.1 | NM_001164329       | Gm6904  | predicted gene 6904                              | 59244441  | 59260216  | TC1400002160.mm.1 | 0.0 | 0.964667 |
| TC1900000698.mm.1 | NM_011725          | Xlr     | X-linked lymphocyte-regulated complex            | 53777118  | 53797706  | TC0X00002247.mm.1 | 0.0 | 0.964813 |
| TC1900000703.mm.1 | NM_009668          | Bin1    | bridging integrator 1                            | 32377217  | 32435740  | TC1800000261.mm.1 | 0.0 | 0.964852 |
| TC1900000709.mm.1 | ENSMUST00000176664 | Gm25190 | predicted gene, 25190                            | 116531646 | 116531740 | TC1000002909.mm.1 | 0.0 | 0.964922 |
| TC1900000711.mm.1 | ENSMUST00000120252 | Gm7571  | predicted gene 7571                              | 147173481 | 147175116 | TC0600001745.mm.1 | 0.0 | 0.965    |
| TC1900000716.mm.1 | NM_010257          | Gast    | gastrin                                          | 100334407 | 100336997 | TC1100001622.mm.1 | 0.0 | 0.965192 |
| TC1900000717.mm.1 | NM_001163276       | Med16   | mediator complex subunit 16                      | 79894707  | 79908938  | TC1000002484.mm.1 | 0.0 | 0.965277 |
| TC1900000720.mm.1 | ENSMUST00000122606 | Gm25270 | predicted gene, 25270                            | 133797512 | 133797719 | TC0400003716.mm.1 | 0.0 | 0.96535  |
| TC1900000725.mm.1 | NM_025317          | Mrpl54  | mitochondrial ribosomal protein L54              | 81264783  | 81266934  | TC1000002534.mm.1 | 0.0 | 0.965362 |
| TC1900000727.mm.1 | NR_037311          | Mir3473 | microRNA 3473                                    | 100078389 | 100188036 | TC1500002233.mm.1 | 0.0 | 0.965378 |
| TC1900000748.mm.1 | NR_035408          | Mir669a | microRNA 669a-1                                  | 10476853  | 10476949  | TC0200000111.mm.1 | 0.0 | 0.965388 |
| TC1900000756.mm.1 | ENSMUST00000179798 | mmu-mir | mmu-mir-669a-1 // mmu-mir-669a-4 // mmu-n        | 10512203  | 10512299  | TC0200000193.mm.1 | 0.0 | 0.965388 |
| TC1900000764.mm.1 | ENSMUST00000082920 | Gm24527 | predicted gene, 24527                            | 106780114 | 106780220 | TC1300002616.mm.1 | 0.0 | 0.965431 |
| TC1900000766.mm.1 | ENSMUST00000175622 | Gm22002 | predicted gene, 22002                            | 105992757 | 105992881 | TC0200001589.mm.1 | 0.0 | 0.965465 |
| TC1900000776.mm.1 | ENSMUST00000179182 | Gm24766 | predicted gene, 24766                            | 32690250  | 32690370  | TC0700000603.mm.1 | 0.0 | 0.965531 |
| TC1900000795.mm.1 | ENSMUST00000177758 | Gm25817 | predicted gene, 25817                            | 32917146  | 32917266  | TC0700000606.mm.1 | 0.0 | 0.965531 |
| TC1900000801.mm.1 | BC063059           | Usp25   | ubiquitin specific peptidase 25                  | 77014069  | 77116780  | TC1600000861.mm.1 | 0.0 | 0.965549 |
| TC1900000813.mm.1 | ENSMUST00000122699 | Gm24378 | predicted gene, 24378                            | 47270859  | 47270964  | TC1000001933.mm.1 | 0.0 | 0.965671 |
| TC1900000814.mm.1 | NM_001037751       | Defb48  | defensin beta 48                                 | 62977524  | 62984510  | TC1400002213.mm.1 | 0.0 | 0.965687 |
| TC1900000819.mm.1 | XR_141198          | LOC1000 | uncharacterized LOC100036572                     | 5438065   | 5455467   | TC1400002856.mm.1 | 0.0 | 0.965975 |
| TC1900000844.mm.1 | NM_145146          | Afm     | afamin                                           | 90518932  | 90553544  | TC0500000836.mm.1 | 0.0 | 0.966177 |
| TC1900000851.mm.1 | NM_147222          | Rdh19   | retinol dehydrogenase 19                         | 127849928 | 127861176 | TC1000001575.mm.1 | 0.0 | 0.966612 |
| TC1900000857.mm.1 | ENSMUST00000174899 | Gm22548 | predicted gene, 22548                            | 67616975  | 67617052  | TC1000000576.mm.1 | 0.0 | 0.967141 |
| TC1900000861.mm.1 | ENSMUST00000158812 | Gm23199 | predicted gene, 23199                            | 140679696 | 140679802 | TC0X00001385.mm.1 | 0.0 | 0.967172 |
| TC1900000866.mm.1 | NM_011159          | Prkdc   | protein kinase, DNA activated, catalytic polype  | 15637866  | 15842239  | TC1600000190.mm.1 | 0.0 | 0.967427 |
| TC1900000876.mm.1 | NM_010106          | Eef1a1  | eukaryotic translation elongation factor 1 alpha | 78478449  | 78489151  | TC0900002727.mm.1 | 0.0 | 0.967563 |
| TC1900000878.mm.1 | NM_001033770       | Gm904   | predicted gene 904                               | 50643228  | 50645838  | TC1300000589.mm.1 | 0.0 | 0.967738 |
| TC1900000882.mm.1 | ENSMUST00000079884 | Gm10042 | predicted gene 10042                             | 153785053 | 153785134 | TC0300001545.mm.1 | 0.0 | 0.967773 |
| TC1900000889.mm.1 | ENSMUST00000116890 | Gm22711 | predicted gene, 22711                            | 106501245 | 106501377 | TC1100001784.mm.1 | 0.0 | 0.967804 |
| TC1900000890.mm.1 | ENSMUST00000083758 | Gm25410 | predicted gene, 25410                            | 8824011   | 8824147   | TC1000001717.mm.1 | 0.0 | 0.967873 |
| TC1900000896.mm.1 | ENSMUST00000175161 | Gm25733 | predicted gene, 25733                            | 80721352  | 80721477  | TC0800000891.mm.1 | 0.0 | 0.967889 |
| TC1900000897.mm.1 | ENSMUST00000093660 | Gm24163 | predicted gene, 24163                            | 75905147  | 75905278  | TC1300000920.mm.1 | 0.0 | 0.96793  |
| TC1900000898.mm.1 | NM_145582          | Ctu1    | cytosolic thioridylase subunit 1 homolog (S. p   | 43672016  | 43678298  | TC0700000768.mm.1 | 0.0 | 0.968029 |
| TC1900000906.mm.1 | NM_001111331       | Kcnp3   | Kv channel interacting protein 3, calsenilin     | 127456498 | 127522094 | TC0200004556.mm.1 | 0.0 | 0.968349 |
| TC1900000907.mm.1 | OTTMUST00000090385 | RP23-34 | ---                                              | 103159795 | 103164069 | TC1300002574.mm.1 | 0.0 | 0.96849  |
| TC1900000908.mm.1 | NR_039557          | Mir5098 | microRNA 5098                                    | 77272757  | 77272838  | TC0500000739.mm.1 | 0.0 | 0.96877  |

|                   |                    |          |                                              |           |           |                    |     |          |
|-------------------|--------------------|----------|----------------------------------------------|-----------|-----------|--------------------|-----|----------|
| TC1900000910.mm.1 | ENSMUST00000158519 | Gm25264  | predicted gene, 25264                        | 46606967  | 46607083  | TC0200003486.mm.1  | 0.0 | 0.968893 |
| TC1900000913.mm.1 | ENSMUST00000104778 | Gm26259  | predicted gene, 26259                        | 5997455   | 5997551   | TC1300001392.mm.1  | 0.0 | 0.969062 |
| TC1900000915.mm.1 | NM_172293          | Pced1b   | PC-esterase domain containing 1B             | 97247107  | 97385693  | TC1500000960.mm.1  | 0.0 | 0.969067 |
| TC1900000921.mm.1 | ENSMUST00000166681 | Gm17482  | predicted gene, 17482                        | 115227343 | 115259294 | TC0600001278.mm.1  | 0.0 | 0.969189 |
| TC1900000924.mm.1 | XM_003084992       | Gm8050   | predicted gene 8050                          | 6712183   | 6720251   | TC1400001415.mm.1  | 0.0 | 0.969287 |
| TC1900000926.mm.1 | ENSMUST00000158856 | Gm24738  | predicted gene, 24738                        | 76006319  | 76006441  | TC0500002624.mm.1  | 0.0 | 0.969585 |
| TC1900000937.mm.1 | ENSMUST00000157612 | Gm25424  | predicted gene, 25424                        | 108120470 | 108120527 | TC0700004047.mm.1  | 0.0 | 0.969875 |
| TC1900000939.mm.1 | NCBI_Gene:667481:p | Trav6d-  | T cell receptor alpha variable 6D-5          | 52795028  | 52795633  | TC1400000629.mm.1  | 0.0 | 0.970028 |
| TC1900000941.mm.1 | ENSMUST00000175462 | Gm22411  | predicted gene, 22411                        | 127891988 | 127892113 | TC0200001923.mm.1  | 0.0 | 0.970056 |
| TC1900000952.mm.1 | NM_015814          | Dkk3     | dickkopf homolog 3 (Xenopus laevis)          | 112116017 | 112159057 | TC07000004119.mm.1 | 0.0 | 0.97018  |
| TC1900000954.mm.1 | ENSMUST00000180521 | 1810049  | ---                                          | 12321438  | 12321899  | TC1500001226.mm.1  | 0.0 | 0.970206 |
| TC1900000955.mm.1 | ENSMUST00000083450 | Gm23093  | predicted gene, 23093                        | 18738695  | 18738796  | TC1100000176.mm.1  | 0.0 | 0.970733 |
| TC1900000960.mm.1 | NM_021443          | Ccl8     | chemokine (C-C motif) ligand 8               | 82115185  | 82116799  | TC1100001223.mm.1  | 0.0 | 0.971375 |
| TC1900000963.mm.1 | NR_033599          | Gm6682   | tubulin, alpha 1C pseudogene                 | 4782170   | 4783512   | TC1200000033.mm.1  | 0.0 | 0.971902 |
| TC1900000965.mm.1 | NM_134154          | Slc25a4  | solute carrier family 25, member 45          | 5877808   | 5885768   | TC1900000090.mm.1  | 0.0 | 0.971921 |
| TC1900000967.mm.1 | ENSMUST00000175062 | Gm23967  | predicted gene, 23967                        | 64101430  | 64101507  | TC0500002463.mm.1  | 0.0 | 0.972245 |
| TC1900000971.mm.1 | XM_001477780       | Gm3685   | predicted gene 3685                          | 7036535   | 7044970   | TC1400001419.mm.1  | 0.0 | 0.972721 |
| TC1900000975.mm.1 | ENSMUST00000175061 | Gm26460  | predicted gene, 26460                        | 6563780   | 6563905   | TC1900000121.mm.1  | 0.0 | 0.972583 |
| TC1900000977.mm.1 | XR_105138          | D630004  | RIKEN cDNA D630004N19 gene                   | 100545748 | 100608297 | TC0700003822.mm.1  | 0.0 | 0.972667 |
| TC1900000983.mm.1 | ENSMUST00000175311 | Gm24816  | predicted gene, 24816                        | 90681370  | 90681520  | TC0600002719.mm.1  | 0.0 | 0.972693 |
| TC1900000991.mm.1 | ENSMUST00000175177 | Gm24081  | predicted gene, 24081                        | 127040561 | 127040685 | TC0200001905.mm.1  | 0.0 | 0.972752 |
| TC1900000995.mm.1 | ENSMUST00000158335 | Gm22090  | predicted gene, 22090                        | 105020268 | 105020378 | TC0X00002806.mm.1  | 0.0 | 0.973162 |
| TC1900000996.mm.1 | XR_105340          | Gm20114  | predicted gene, 20114                        | 13966077  | 14151378  | TC1000000100.mm.1  | 0.0 | 0.973171 |
| TC1900000997.mm.1 | NM_145377          | Trim41   | tripartite motif-containing 41               | 48806404  | 48817391  | TC1100002637.mm.1  | 0.0 | 0.973173 |
| TC1900000999.mm.1 | ENSMUST00000177635 | Gm24304  | predicted gene, 24304                        | 80098908  | 80099014  | TC0500000748.mm.1  | 0.0 | 0.973251 |
| TC1900001002.mm.1 | NM_001127354       | Gm11938  | predicted gene 11938                         | 99602646  | 99603308  | TC1100003720.mm.1  | 0.0 | 0.973261 |
| TC1900001011.mm.1 | NM_001081040       | Ccoq10a  | coenzyme Q10 homolog A (yeast)               | 128363097 | 128370037 | TC10000003140.mm.1 | 0.0 | 0.973378 |
| TC1900001012.mm.1 | ENSMUST00000175110 | Gm25960  | predicted gene, 25960                        | 72950863  | 72950987  | TC0200003746.mm.1  | 0.0 | 0.973382 |
| TC1900001015.mm.1 | ENSMUST00000105679 | A930039  | RIKEN cDNA A930039A15 gene                   | 153905301 | 153916910 | TC0100001388.mm.1  | 0.0 | 0.973438 |
| TC1900001017.mm.1 | XM_484483          | K230010  | RIKEN cDNA K230010J24 gene                   | 76009069  | 76035239  | TC1500000570.mm.1  | 0.0 | 0.973473 |
| TC1900001019.mm.1 | ENSMUST00000116950 | Gm23840  | predicted gene, 23840                        | 78754426  | 78754522  | TC1100003311.mm.1  | 0.0 | 0.973494 |
| TC1900001020.mm.1 | ENSMUST00000104507 | Gm24519  | predicted gene, 24519                        | 76604319  | 76604450  | TC1300002345.mm.1  | 0.0 | 0.973665 |
| TC1900001022.mm.1 | ENSMUST00000120431 | Gm12846  | predicted gene 12846                         | 98664366  | 98666137  | TC0400000985.mm.1  | 0.0 | 0.97378  |
| TC1900001023.mm.1 | NM_015741          | Krtap9-  | keratin associated protein 9-1               | 99873389  | 99874432  | TC1100001606.mm.1  | 0.0 | 0.973793 |
| TC1900001025.mm.1 | ENSMUST00000157422 | Gm23325  | predicted gene, 23325                        | 143413898 | 143414026 | TC0X00001412.mm.1  | 0.0 | 0.973811 |
| TC1900001026.mm.1 | ENSMUST00000158038 | Gm25332  | predicted gene, 25332                        | 92882451  | 92882555  | TC0X00000878.mm.1  | 0.0 | 0.973983 |
| TC1900001028.mm.1 | XR_001627          | Gm8995   | predicted gene 8995                          | 106503886 | 106529208 | TC0700004009.mm.1  | 0.0 | 0.974258 |
| TC1900001029.mm.1 | ENSMUST00000083688 | Gm24763  | predicted gene, 24763                        | 43254046  | 43254235  | TC0X00000407.mm.1  | 0.0 | 0.974303 |
| TC1900001030.mm.1 | ENSMUST00000175951 | Gm24758  | predicted gene, 24758                        | 5579181   | 5579263   | TC1200000046.mm.1  | 0.0 | 0.974362 |
| TC1900001036.mm.1 | ENSMUST00000085330 | Gm10491  | predicted gene 10491                         | 7907693   | 7907835   | TC0X00001785.mm.1  | 0.0 | 0.974432 |
| TC1900001039.mm.1 | ENSMUST00000104166 | Gm26286  | predicted gene, 26286                        | 100831281 | 100831414 | TC0500000986.mm.1  | 0.0 | 0.974481 |
| TC1900001042.mm.1 | NM_133758          | Usp47    | ubiquitin specific peptidase 47              | 112023506 | 112111386 | TC0700001640.mm.1  | 0.0 | 0.974695 |
| TC1900001044.mm.1 | ENSMUST00000179088 | Gm5327   | predicted pseudogene 5327                    | 32545759  | 32546767  | TC0700000600.mm.1  | 0.0 | 0.974733 |
| TC1900001051.mm.1 | ENSMUST00000175424 | Gm22181  | predicted gene, 22181                        | 112218098 | 112218223 | TC0800001345.mm.1  | 0.0 | 0.974763 |
| TC1900001053.mm.1 | XM_984543          | Gm8159   | predicted gene 8159                          | 4632352   | 4656714   | TC1400000029.mm.1  | 0.0 | 0.974807 |
| TC1900001058.mm.1 | NM_010118          | Egr2     | early growth response 2                      | 67535475  | 67542188  | TC0300000636.mm.1  | 0.0 | 0.975005 |
| TC1900001059.mm.1 | ENSMUST00000175333 | Gm25949  | predicted gene, 25949                        | 86699043  | 86699156  | TC0900002782.mm.1  | 0.0 | 0.975125 |
| TC1900001062.mm.1 | NM_026554          | Ncbp2    | nuclear cap binding protein subunit 2        | 31948513  | 31961781  | TC1600000425.mm.1  | 0.0 | 0.975155 |
| TC1900001073.mm.1 | ENSMUST00000175384 | Gm24365  | predicted gene, 24365                        | 128478014 | 128478138 | TC0700004367.mm.1  | 0.0 | 0.975233 |
| TC1900001080.mm.1 | NM_145479          | Klhl22   | kelch-like 22                                | 17759618  | 17793382  | TC1600000224.mm.1  | 0.0 | 0.975254 |
| TC1900001083.mm.1 | ENSMUST00000175364 | Gm25535  | predicted gene, 25535                        | 117935469 | 117935593 | TC0600002993.mm.1  | 0.0 | 0.975432 |
| TC1900001085.mm.1 | ENSMUST00000083787 | Gm26168  | predicted gene, 26168                        | 122623547 | 122623658 | TC0600001387.mm.1  | 0.0 | 0.975491 |
| TC1900001095.mm.1 | NM_153152          | 2410015  | RIKEN cDNA 2410015M20 gene                   | 56607452  | 56609771  | TC1700002332.mm.1  | 0.0 | 0.975502 |
| TC1900001096.mm.1 | ENSMUST00000177656 | Gm25195  | predicted gene, 25195                        | 28526332  | 28526457  | TC1700000480.mm.1  | 0.0 | 0.975613 |
| TC1900001097.mm.1 | ENSMUST00000175019 | Gm23365  | predicted gene, 23365                        | 113528550 | 113528674 | TC06000002925.mm.1 | 0.0 | 0.975729 |
| TC1900001109.mm.1 | ENSMUST00000175365 | Gm25534  | predicted gene, 25534                        | 93923187  | 93923311  | TC1300002441.mm.1  | 0.0 | 0.975816 |
| TC1900001113.mm.1 | ENSMUST00000083327 | Gm23452  | predicted gene, 23452                        | 80984083  | 80984189  | TC0200003847.mm.1  | 0.0 | 0.975856 |
| TC1900001124.mm.1 | ENSMUST00000175162 | Gm25734  | predicted gene, 25734                        | 57565793  | 57566109  | TC0600000697.mm.1  | 0.0 | 0.975888 |
| TC1900001128.mm.1 | ENSMUST00000184128 | AL59612  | N/A                                          | 69505358  | 69505435  | TC1100003045.mm.1  | 0.0 | 0.976022 |
| TC1900001130.mm.1 | ENSMUST00000099773 | Olfir124 | olfactory receptor 1245                      | 89574712  | 89575773  | TC0200004063.mm.1  | 0.0 | 0.976039 |
| TC1900001131.mm.1 | ENSMUST00000158394 | Gm25522  | predicted gene, 25522                        | 104865204 | 104865308 | TC1000002791.mm.1  | 0.0 | 0.976109 |
| TC1900001134.mm.1 | ENSMUST00000178795 | Gm22420  | predicted gene, 22420                        | 26580802  | 26580927  | TC1700001701.mm.1  | 0.0 | 0.976134 |
| TC1900001137.mm.1 | ENSMUST00000175378 | Gm25640  | predicted gene, 25640                        | 64971669  | 64971793  | TC0900002502.mm.1  | 0.0 | 0.976165 |
| TC1900001144.mm.1 | NM_001170454       | Tada2b   | transcriptional adaptor 2B                   | 36473670  | 36484285  | TC0500002258.mm.1  | 0.0 | 0.976175 |
| TC1900001149.mm.1 | NM_173756          | Lin52    | lin-52 homolog (C. elegans)                  | 84451422  | 84531533  | TC1200000813.mm.1  | 0.0 | 0.976203 |
| TC1900001156.mm.1 | ENSMUST00000066954 | LOC1008  | uncharacterized LOC100862627 // RIKEN cDNA   | 25222848  | 25223153  | TC0500002101.mm.1  | 0.0 | 0.976278 |
| TC1900001158.mm.1 | ENSMUST00000178610 | Kat2b-p  | K(lysine) acetyltransferase 2B, pseudogene   | 93390602  | 93393091  | TC0500002775.mm.1  | 0.0 | 0.976348 |
| TC1900001163.mm.1 | ENSMUST00000158914 | Gm25160  | predicted gene, 25160                        | 97222534  | 97222635  | TC0800001156.mm.1  | 0.0 | 0.976426 |
| TC1900001173.mm.1 | ENSMUST00000109941 | Gm11032  | predicted gene 11032                         | 4620067   | 4621698   | TC1100000047.mm.1  | 0.0 | 0.976628 |
| TC1900001180.mm.1 | ENSMUST00000121384 | Gm12403  | predicted gene 12403                         | 41168646  | 41169604  | TC0400000361.mm.1  | 0.0 | 0.976649 |
| TC1900001184.mm.1 | NM_001039244       | Gm7120   | predicted gene 7120                          | 119487941 | 119610459 | TC1300001349.mm.1  | 0.0 | 0.97667  |
| TC1900001185.mm.1 | ENSMUST00000120986 | Gm14422  | predicted gene 14422                         | 122612228 | 122612378 | TC0700001764.mm.1  | 0.0 | 0.976761 |
| TC1900001188.mm.1 | NCBI_Gene:780956:p | Ighv1-6  | immunoglobulin heavy variable V1-63          | 115495625 | 115496058 | TC1200002642.mm.1  | 0.0 | 0.976809 |
| TC1900001195.mm.1 | NM_010453          | Hoxa5    | homeobox A5                                  | 52201754  | 52204587  | TC0600002279.mm.1  | 0.0 | 0.977017 |
| TC1900001196.mm.1 | NM_010582          | Itih2    | inter-alpha trypsin inhibitor, heavy chain 2 | 10094591  | 10131396  | TC0200002945.mm.1  | 0.0 | 0.977043 |
| TC1900001199.mm.1 | NCBI_Gene:629849:p | Ighv8-2  | Ighv8-2 immunoglobulin heavy variable V8-2   | 114462290 | 114462589 | TC1200002476.mm.1  | 0.0 | 0.977358 |
| TC1900001200.mm.1 | ENSMUST00000175055 | Gm22692  | predicted gene, 22692                        | 165908051 | 165908175 | TC02000005158.mm.1 | 0.0 | 0.977391 |
| TC1900001205.mm.1 | ENSMUST00000121919 | Gm14491  | predicted gene 14491                         | 11913091  | 11913289  | TC0X00001850.mm.1  | 0.0 | 0.977542 |

|                   |                    |         |                                                 |           |           |                    |     |          |
|-------------------|--------------------|---------|-------------------------------------------------|-----------|-----------|--------------------|-----|----------|
| TC1900001207.mm.1 | ENSMUST00000122258 | Gm15376 | predicted gene 15376                            | 88191901  | 88192683  | TC0100000844.mm.1  | 0.0 | 0.977686 |
| TC1900001219.mm.1 | ENSMUST00000104030 | Gm23948 | predicted gene, 23948                           | 65562163  | 65562294  | TC1200001837.mm.1  | 0.0 | 0.977973 |
| TC1900001225.mm.1 | ENSMUST00000175073 | Gm23638 | predicted gene, 23638                           | 18129452  | 18129577  | TC0200003031.mm.1  | 0.0 | 0.978061 |
| TC1900001226.mm.1 | ENSMUST00000178821 | Gm23681 | predicted gene, 23681                           | 20937576  | 20937701  | TC1100002318.mm.1  | 0.0 | 0.978061 |
| TC1900001238.mm.1 | ENSMUST00000176930 | Gm25530 | predicted gene, 25530                           | 79562167  | 79562292  | TC1400002492.mm.1  | 0.0 | 0.978061 |
| TC1900001246.mm.1 | ENSMUST00000158221 | Gm26354 | predicted gene, 26354                           | 22409923  | 22410051  | TC0300001717.mm.1  | 0.0 | 0.97809  |
| TC1900001259.mm.1 | ENSMUST00000175328 | Gm23611 | predicted gene, 23611                           | 63198031  | 63198156  | TC0100000522.mm.1  | 0.0 | 0.978195 |
| TC1900001266.mm.1 | ENSMUST00000174916 | Gm25240 | predicted gene, 25240                           | 53443271  | 53443395  | TC0100002336.mm.1  | 0.0 | 0.978429 |
| TC1900001270.mm.1 | NM_008444          | Kif3b   | kinesin family member 3B                        | 153291413 | 153333390 | TC0200002314.mm.1  | 0.0 | 0.978534 |
| TC1900001273.mm.1 | NM_001010838       | Taar7d  | trace amine-associated receptor 7D              | 24027221  | 24028298  | TC1000002020.mm.1  | 0.0 | 0.978658 |
| TC1900001276.mm.1 | ENSMUST00000167402 | Gm15459 | predicted gene 15459                            | 5781530   | 5783620   | TC0500001915.mm.1  | 0.0 | 0.978683 |
| TC1900001282.mm.1 | ENSMUST00000175269 | Gm22460 | predicted gene, 22460                           | 3957119   | 3957242   | TC1300001376.mm.1  | 0.0 | 0.978865 |
| TC1900001289.mm.1 | NM_008222          | Hccs    | holocytochrome c synthetase                     | 169250193 | 169320372 | TC0X00003376.mm.1  | 0.0 | 0.978886 |
| TC1900001290.mm.1 | NM_026455          | Fam32a  | family with sequence similarity 32, member A    | 72219730  | 72223775  | TC0800000818.mm.1  | 0.0 | 0.978962 |
| TC1900001296.mm.1 | ENSMUST00000175545 | Gm22569 | predicted gene, 22569                           | 155315966 | 155316089 | TC0100001400.mm.1  | 0.0 | 0.979095 |
| TC1900001298.mm.1 | NM_001167584       | Gm17689 | predicted gene, 17689                           | 36581278  | 36582635  | TC0900002033.mm.1  | 0.0 | 0.979159 |
| TC1900001300.mm.1 | ENSMUST00000119347 | Gm6877  | predicted pseudogene 6877                       | 33191196  | 33192296  | TC0800002003.mm.1  | 0.0 | 0.979252 |
| TC1900001314.mm.1 | ENSMUST00000184832 | CAA0A10 | N/A                                             | 3004130   | 3004229   | TC0300001591.mm.1  | 0.0 | 0.979298 |
| TC1900001330.mm.1 | ENSMUST00000093689 | n-R5c21 | nuclear encoded rRNA 5S 211                     | 46374197  | 46374315  | TC0100000354.mm.1  | 0.0 | 0.979339 |
| TC1900001332.mm.1 | ENSMUST00000175047 | Gm23968 | predicted gene, 23968                           | 160624468 | 160624592 | TC0200002451.mm.1  | 0.0 | 0.979398 |
| TC1900001335.mm.1 | ENSMUST00000175382 | Gm22625 | predicted gene, 22625                           | 98557740  | 98557865  | TC0400003119.mm.1  | 0.0 | 0.979399 |
| TC1900001340.mm.1 | ENSMUST00000175198 | Gm22907 | predicted gene, 22907                           | 120852171 | 120852296 | TC0500003179.mm.1  | 0.0 | 0.979399 |
| TC1900001353.mm.1 | ENSMUST00000177685 | Gm26268 | predicted gene, 26268                           | 10965724  | 10965849  | TC1600000127.mm.1  | 0.0 | 0.979399 |
| TC1900001355.mm.1 | ENSMUST00000178626 | Gm24979 | predicted gene, 24979                           | 45209966  | 45210091  | TC1700000854.mm.1  | 0.0 | 0.979399 |
| TC1900001357.mm.1 | ENSMUST00000103908 | Gm22015 | predicted gene, 22015                           | 91791610  | 91791674  | TC1200002157.mm.1  | 0.0 | 0.979485 |
| TC1900001359.mm.1 | ENSMUST00000183434 | AL66983 | N/A                                             | 129762311 | 129762436 | TC04000003616.mm.1 | 0.0 | 0.979666 |
| TC1900001395.mm.1 | ENSMUST00000128841 | Gm16024 | predicted gene 16024                            | 155616409 | 155616787 | TC0400002081.mm.1  | 0.0 | 0.97985  |
| TC1900001404.mm.1 | ENSMUST00000082899 | Gm25926 | predicted gene, 25926                           | 77418417  | 77418576  | TC1200000693.mm.1  | 0.0 | 0.979892 |
| TC1900001406.mm.1 | NM_172926          | Snx14   | sorting nexin 14                                | 88376747  | 88438958  | TC0900003341.mm.1  | 0.0 | 0.979904 |
| TC1900001409.mm.1 | ENSMUST00000183751 | AC15394 | N/A                                             | 58965543  | 58965746  | TC1000000527.mm.1  | 0.0 | 0.98001  |
| TC1900001415.mm.1 | ENSMUST00000183329 | Gm7985  | predicted gene 7985                             | 71846311  | 71847291  | TC1200001897.mm.1  | 0.0 | 0.980024 |
| TC1900001417.mm.1 | NM_198095          | Bst2    | bone marrow stromal cell antigen 2              | 71534256  | 71537437  | TC0800002431.mm.1  | 0.0 | 0.980058 |
| TC1900001419.mm.1 | ENSMUST00000121335 | Gm14423 | predicted gene 14423                            | 122550435 | 122550555 | TC0700004233.mm.1  | 0.0 | 0.98012  |
| TC1900001422.mm.1 | NM_178724          | Harb1   | harbinger transposase derived 1                 | 91710852  | 91721566  | TC0200001381.mm.1  | 0.0 | 0.980166 |
| TC1900001425.mm.1 | NR_110477          | Gm12338 | predicted gene 12338 (Gm12338), non-coding RI   | 0         | 0         | TSUnmapped0000009  | 0.0 | 0.980197 |
| TC1900001428.mm.1 | ENSMUST00000157446 | Gm22818 | predicted gene, 22818                           | 86212554  | 86212657  | TC1500002014.mm.1  | 0.0 | 0.980223 |
| TC1900001430.mm.1 | NM_026270          | Akt1s1  | AKT1 substrate 1 (proline-rich)                 | 44848991  | 44855421  | TC0700000819.mm.1  | 0.0 | 0.980457 |
| TC1900001433.mm.1 | NM_019480          | Ebag9   | estrogen receptor-binding fragment-associated g | 44619313  | 44641027  | TC1500000355.mm.1  | 0.0 | 0.980603 |
| TC1900001437.mm.1 | ENSMUST00000175050 | Gm22174 | predicted gene, 22174                           | 163092899 | 163093023 | TC0200002480.mm.1  | 0.0 | 0.980637 |
| TC1900001445.mm.1 | NM_022993          | Lrp10   | low-density lipoprotein receptor-related protei | 54464147  | 54471497  | TC1400000747.mm.1  | 0.0 | 0.980899 |
| TC1900001455.mm.1 | ENSMUST00000175060 | Gm24243 | predicted gene, 24243                           | 38637018  | 38637143  | TC0200003422.mm.1  | 0.0 | 0.980963 |
| TC1900001461.mm.1 | ENSMUST00000174964 | Gm24513 | predicted gene, 24513                           | 63273226  | 63273363  | TC0100002450.mm.1  | 0.0 | 0.981072 |
| TC1900001464.mm.1 | ENSMUST00000178237 | Gm24303 | predicted gene, 24303                           | 29150554  | 29150679  | TC0600001971.mm.1  | 0.0 | 0.981152 |
| TC1900001470.mm.1 | ENSMUST00000185136 | AL67023 | N/A                                             | 155789581 | 155789706 | TC0400002089.mm.1  | 0.0 | 0.981167 |
| TC1900001474.mm.1 | ENSMUST00000157729 | Gm24012 | predicted gene, 24012                           | 24336340  | 24336465  | TC0700002598.mm.1  | 0.0 | 0.981167 |
| TC1900001484.mm.1 | NM_024456          | Rab5c   | RAB5C, member RAS oncogene family               | 100715009 | 100738215 | TC1100003781.mm.1  | 0.0 | 0.981542 |
| TC1900001490.mm.1 | ENSMUST00000158689 | Gm23185 | predicted gene, 23185                           | 48906652  | 48906736  | TC1500001488.mm.1  | 0.0 | 0.981631 |
| TC1900001492.mm.1 | ENSMUST00000174941 | Gm22398 | predicted gene, 22398                           | 117158309 | 117158433 | TC0400003365.mm.1  | 0.0 | 0.981691 |
| TC1900001500.mm.1 | ENSMUST00000175167 | Gm25731 | predicted gene, 25731                           | 65509368  | 65509492  | TC1700001069.mm.1  | 0.0 | 0.981691 |
| TC1900001506.mm.1 | ENSMUST00000182847 | Gm4812  | predicted gene 4812                             | 69345655  | 69346647  | TC1300000846.mm.1  | 0.0 | 0.981763 |
| TC1900001510.mm.1 | ENSMUST00000180144 | Gm26269 | predicted gene, 26269                           | 319822109 | 31982234  | TC0900000426.mm.1  | 0.0 | 0.981863 |
| TC1900001511.mm.1 | ENSMUST00000101896 | Gm24310 | predicted gene, 24310                           | 59518411  | 59518489  | TC0700003216.mm.1  | 0.0 | 0.982055 |
| TC1900001512.mm.1 | NM_021524          | Nampt   | nicotinamide phosphoribosyltransferase          | 32820335  | 32853369  | TC1200000279.mm.1  | 0.0 | 0.982086 |
| TC1900001514.mm.1 | NM_177363          | Tarm1   | T cell-interacting, activating receptor on myel | 3488991   | 3502552   | TC0700002128.mm.1  | 0.0 | 0.982087 |
| TC1900001522.mm.1 | NM_181752          | Gpr135  | G protein-coupled receptor 135                  | 72067976  | 72071053  | TC1200001898.mm.1  | 0.0 | 0.982102 |
| TC1900001536.mm.1 | ENSMUST00000179485 | Gm26266 | predicted gene, 26266                           | 72511209  | 72511334  | TC0900002641.mm.1  | 0.0 | 0.982136 |
| TC1900001541.mm.1 | NM_010640          | Klk1b11 | kallikrein 1-related peptidase b11              | 43995877  | 43999875  | TC0700000786.mm.1  | 0.0 | 0.982198 |
| TC1900001544.mm.1 | ENSMUST00000119639 | Gm13784 | predicted gene 13784                            | 114237176 | 114237925 | TC0500003058.mm.1  | 0.0 | 0.982288 |
| TC1900001545.mm.1 | NM_146033          | Ankmy2  | ankyrin repeat and MYND domain containing 2     | 36157124  | 36197291  | TC1200000319.mm.1  | 0.0 | 0.982309 |
| TC1900001548.mm.1 | ENSMUST00000157619 | Gm25909 | predicted gene, 25909                           | 3057799   | 3057919   | TC1700001347.mm.1  | 0.0 | 0.982527 |
| TC1900001550.mm.1 | XR_106003          | BE69200 | expressed sequence BE692007                     | 11470041  | 11484577  | TC1900001134.mm.1  | 0.0 | 0.982595 |
| TC1900001553.mm.1 | NM_177994          | R3hdm4  | R3H domain containing 4                         | 79910052  | 79917006  | TC1000002485.mm.1  | 0.0 | 0.98274  |
| TC1900001554.mm.1 | NM_027905          | 1300018 | RIKEN cDNA 1300018J18 gene                      | 89089038  | 89100340  | TC1500000862.mm.1  | 0.0 | 0.982761 |
| TC1900001569.mm.1 | NM_183131          | 4930451 | RIKEN cDNA 4930451I11 gene                      | 126830474 | 126831496 | TC0700004300.mm.1  | 0.0 | 0.982763 |
| TC1900001581.mm.1 | ENSMUST00000083960 | n-R5c46 | nuclear encoded rRNA 5S 46                      | 36855929  | 36856464  | TC1400001740.mm.1  | 0.0 | 0.982918 |
| TC1900001600.mm.1 | ENSMUST00000158473 | Gm25653 | predicted gene, 25653                           | 72906201  | 72906338  | TC0400002856.mm.1  | 0.0 | 0.98299  |
| TC1900001603.mm.1 | NM_009945          | Cox7a2  | cytochrome c oxidase subunit VIIa 2             | 79755241  | 79759853  | TC0900002737.mm.1  | 0.0 | 0.983482 |
| TC1900001613.mm.1 | ENSMUST00000157460 | Gm25343 | predicted gene, 25343                           | 117976454 | 117976560 | TC05000003133.mm.1 | 0.0 | 0.983764 |
| TC1900001619.mm.1 | ENSMUST00000144024 | Gm12147 | predicted gene 12147                            | 43259791  | 43311088  | TC1100002563.mm.1  | 0.0 | 0.983782 |
| TC1900001622.mm.1 | ENSMUST00000175396 | Gm25995 | predicted gene, 25995                           | 63442319  | 63442460  | TC0900000802.mm.1  | 0.0 | 0.984647 |
| TC1900001626.mm.1 | NR_035479          | Mir1954 | microRNA 1954                                   | 113220187 | 113423560 | TC0200001679.mm.1  | 0.0 | 0.984711 |
| TC1900001647.mm.1 | ENSMUST00000082607 | Gm22978 | predicted gene, 22978                           | 49292742  | 49292901  | TC1700000947.mm.1  | 0.0 | 0.984731 |
| TC1900001648.mm.1 | ENSMUST00000102015 | Gm25089 | predicted gene, 25089                           | 59555854  | 59555932  | TC0700003236.mm.1  | 0.0 | 0.985003 |
| TC1900001660.mm.1 | NR_029581          | Mir195  | microRNA 195                                    | 70235042  | 70235135  | TC1100000945.mm.1  | 0.0 | 0.985201 |
| TC1900001667.mm.1 | NR_037302          | Mir3470 | microRNA 3470b                                  | 143948405 | 144443433 | TC0700004601.mm.1  | 0.0 | 0.985314 |
| TC1900001670.mm.1 | ENSMUST00000122689 | Gm23889 | predicted gene, 23889                           | 114838173 | 114838276 | TC0900001521.mm.1  | 0.0 | 0.985442 |
| TC1900001671.mm.1 | ENSMUST00000179888 | Gm11945 | predicted gene 11945                            | 3470785   | 3471377   | TC1100002089.mm.1  | 0.0 | 0.985515 |
| TC1900001677.mm.1 | ENSMUST00000022260 | Gm5457  | predicted pseudogene 5457                       | 12867553  | 12867888  | TC1400000103.mm.1  | 0.0 | 0.985527 |

|                    |                    |         |                                                 |           |           |                   |     |          |
|--------------------|--------------------|---------|-------------------------------------------------|-----------|-----------|-------------------|-----|----------|
| TC1900001680.mm.1  | ENSMUST00000183924 | RP24-10 | N/A                                             | 15369746  | 15370129  | TC0700002405.mm.1 | 0.0 | 0.98577  |
| TC1900001694.mm.1  | NR_039569          | Mir5109 | microRNA 5109                                   | 17776749  | 17776835  | TC0500001991.mm.1 | 0.0 | 0.986265 |
| TC1900001702.mm.1  | ENSMUST00000120530 | Gm15405 | predicted gene 15405                            | 92039660  | 92040001  | TC1700002748.mm.1 | 0.0 | 0.986348 |
| TC1900001708.mm.1  | ENSMUST00000104257 | Gm23128 | predicted gene, 23128                           | 38982904  | 38983035  | TC0800002100.mm.1 | 0.0 | 0.986777 |
| TC1900001725.mm.1  | ENSMUST00000104105 | Gm24125 | predicted gene, 24125                           | 3857477   | 3857613   | TC0400002130.mm.1 | 0.0 | 0.986813 |
| TC1900001750.mm.1  | NM_010246          | Fzd9    | frizzled homolog 9 (Drosophila)                 | 135248938 | 135251230 | TC0500003391.mm.1 | 0.0 | 0.986892 |
| TC1900001751.mm.1  | ENSMUST00000171153 | Gm17330 | predicted gene, 17330                           | 23968510  | 23968845  | TC1200001525.mm.1 | 0.0 | 0.986919 |
| TC1900001754.mm.1  | ENSMUST00000179241 | Gm26272 | predicted gene, 26272                           | 42317550  | 42317681  | TC0900002118.mm.1 | 0.0 | 0.987173 |
| TC1900001759.mm.1  | XR_035281          | Gm4924  | predicted gene 4924                             | 82354255  | 82404033  | TC1000000924.mm.1 | 0.0 | 0.987188 |
| TC1900001760.mm.1  | NM_172625          | Ino80c  | INO80 complex subunit C                         | 24104757  | 24121953  | TC1800001075.mm.1 | 0.0 | 0.987404 |
| TC1900001762.mm.1  | ENSMUST00000122491 | Gm26254 | predicted gene, 26254                           | 31998624  | 31998741  | TC0400002359.mm.1 | 0.0 | 0.987588 |
| TC1900001763.mm.1  | NM_198612          | Gxylt2  | glucoside xylosyltransferase 2                  | 100704734 | 100805081 | TC0600001154.mm.1 | 0.0 | 0.987758 |
| TC1900001764.mm.1  | ENSMUST00000117115 | Gm12928 | predicted gene 12928                            | 126476727 | 126477299 | TC0400003544.mm.1 | 0.0 | 0.987779 |
| TC1900001767.mm.1  | ENSMUST00000104407 | Gm26019 | predicted gene, 26019                           | 58751478  | 58751596  | TC1600001778.mm.1 | 0.0 | 0.988067 |
| TC1900001768.mm.1  | NM_001271373       | Milr1   | mast cell immunoglobulin like receptor 1        | 106751226 | 106768794 | TC1100001785.mm.1 | 0.0 | 0.988097 |
| TC1900001773.mm.1  | ENSMUST00000175521 | Gm23413 | predicted gene, 23413                           | 4057373   | 4057497   | TC1600001115.mm.1 | 0.0 | 0.988103 |
| TC1_GL456210_rand  | NM_010792          | Mettl1  | methyltransferase like 1                        | 127046314 | 127046365 | TC1000001544.mm.1 | 0.0 | 0.988187 |
| TC1_GL456210_rand  | ENSMUST00000165431 | Gm3138  | predicted gene 3138                             | 4249631   | 4258006   | TC1400000020.mm.1 | 0.0 | 0.988397 |
| TC1_GL456210_rand  | ENSMUST00000157746 | Gm25180 | predicted gene, 25180                           | 89563360  | 89563474  | TC0100000862.mm.1 | 0.0 | 0.988431 |
| TC1_GL456210_rand  | ENSMUST00000103925 | Mir466p | microRNA 466p                                   | 10506006  | 10506094  | TC0200000178.mm.1 | 0.0 | 0.988496 |
| TC1_GL456211_rand  | ENSMUST00000117072 | Gm9126  | predicted pseudogene 9126                       | 102818362 | 102820074 | TC0X00001005.mm.1 | 0.0 | 0.988627 |
| TC1_GL456211_rand  | NM_001010834       | Slc10a5 | solute carrier family 10 (sodium/bile acid cotr | 10331734  | 10335656  | TC0300001644.mm.1 | 0.0 | 0.988703 |
| TC1_GL456211_rand  | ENSMUST00000083955 | Gm22868 | predicted gene, 22868                           | 26337540  | 26337703  | TC1100002395.mm.1 | 0.0 | 0.988843 |
| TC1_GL456211_rand  | ENSMUST00000182962 | Gm8824  | predicted gene 8824                             | 50111073  | 50112062  | TC1600000715.mm.1 | 0.0 | 0.988895 |
| TC1_GL456211_rand  | NR_003280          | Rs5-8s1 | 5.8S ribosomal RNA (Rs5-8s1), ribosomal RNA.    | 0         | 0         | TSUnmapped0000009 | 0.0 | 0.989152 |
| TC1_GL456211_rand  | NM_001164763       | Rarres1 | retinoic acid receptor responder (tazarotene in | 67478886  | 67515523  | TC0300002114.mm.1 | 0.0 | 0.98948  |
| TC1_GL456211_rand  | NR_002895          | Snord11 | small nucleolar RNA, C/D box 116                | 59675988  | 59676081  | TC0700003273.mm.1 | 0.0 | 0.989554 |
| TC1_GL456212_rand  | NR_002895_4        | Gm25350 | predicted gene, 25350                           | 59683586  | 59683679  | TC0700003275.mm.1 | 0.0 | 0.989554 |
| TC1_GL456212_rand  | NR_002895_5        | Gm25350 | predicted gene, 25350                           | 59695744  | 59695837  | TC0700003277.mm.1 | 0.0 | 0.989554 |
| TC1_GL456221_rand  | NR_002895          | Snord11 | small nucleolar RNA, C/D box 116                | 59700878  | 59700971  | TC0700003279.mm.1 | 0.0 | 0.989554 |
| TC1_GL456221_rand  | NR_002895_2        | Gm25350 | predicted gene, 25350                           | 59703427  | 59703520  | TC0700003280.mm.1 | 0.0 | 0.989554 |
| TC1_GL456221_rand  | NR_002895_3        | Gm25350 | predicted gene, 25350                           | 59711009  | 59711102  | TC0700003283.mm.1 | 0.0 | 0.989554 |
| TC1_GL456221_rand  | NR_002895_6        | Gm25350 | predicted gene, 25350                           | 59716059  | 59716152  | TC0700003285.mm.1 | 0.0 | 0.989554 |
| TC1_GL456221_rand  | NR_002895_7        | Gm25350 | predicted gene, 25350                           | 59726161  | 59726254  | TC0700003289.mm.1 | 0.0 | 0.989554 |
| TC1_GL456221_rand  | NR_002895_8        | Gm25350 | predicted gene, 25350                           | 59751489  | 59751582  | TC0700003299.mm.1 | 0.0 | 0.989554 |
| TC1_GL456221_rand  | NR_033779 // NR_   | Snord11 | small nucleolar RNA, C/D box 116-like 2 // pre  | 59876933  | 59877026  | TC0700003329.mm.1 | 0.0 | 0.989554 |
| TC4_GL456216_rand  | ENSMUST00000179518 | Snord11 | small nucleolar RNA, C/D box 116                | 59894620  | 59894713  | TC0700003337.mm.1 | 0.0 | 0.989554 |
| TC4_GL456216_rand  | ENSMUST00000118789 | Gm6322  | predicted gene 6322                             | 139676087 | 139677489 | TC0X00003062.mm.1 | 0.0 | 0.989649 |
| TC4_GL456350_rand  | NM_009037          | Rcn1    | reticulocalbin 1                                | 105385948 | 105399319 | TC0200004264.mm.1 | 0.0 | 0.989705 |
| TC4_GL456350_rand  | NM_009246          | Serpina | serine (or cysteine) peptidase inhibitor, clade | 103763587 | 103773633 | TC1200002532.mm.1 | 0.0 | 0.98995  |
| TC4_GL456350_rand  | NM_001024702       | C1ql4   | complement component 1, q subcomponent-like     | 99084686  | 99087817  | TC0800002203.mm.1 | 0.0 | 0.990193 |
| TC4_GL456350_rand  | NM_146682          | Olfr76  | olfactory receptor 76                           | 12119653  | 12120700  | TC1900001156.mm.1 | 0.0 | 0.990286 |
| TC4_GL456350_rand  | NR_037301          | Mir3470 | microRNA 3470a                                  | 3239902   | 3462990   | TC1100002080.mm.1 | 0.0 | 0.990561 |
| TC4_JH584293_rand  | NM_019639          | Ubc     | ubiquitin C                                     | 125385965 | 125390202 | TC0500003273.mm.1 | 0.0 | 0.99089  |
| TC4_JH584293_rand  | ENSMUST00000184087 | AC12605 | N/A                                             | 91944071  | 91944148  | TC1600002087.mm.1 | 0.0 | 0.990962 |
| TC4_JH584293_rand  | NM_030734          | Defb5   | defensin beta 5                                 | 19247580  | 19245028  | TC0800000184.mm.1 | 0.0 | 0.990996 |
| TC4_JH584293_rand  | NM_177613          | Cdc34   | cell division cycle 34                          | 79682195  | 79688398  | TC1000000810.mm.1 | 0.0 | 0.991289 |
| TC4_JH584293_rand  | ENSMUST00000179712 | Gm23943 | predicted gene, 23943                           | 56999155  | 56999275  | TC0100002366.mm.1 | 0.0 | 0.991344 |
| TC4_JH584293_rand  | NM_145959          | D15Ertd | DNA segment, Chr 15, ERATO Doi 621, expressec   | 58415468  | 58457801  | TC1500000417.mm.1 | 0.0 | 0.991411 |
| TC4_JH584293_rand  | ENSMUST00000104283 | Gm24788 | predicted gene, 24788                           | 65001307  | 65001462  | TC0100002473.mm.1 | 0.0 | 0.991418 |
| TC4_JH584294_rand  | ENSMUST00000175943 | Gm5139  | predicted gene 5139                             | 64163390  | 64163638  | TC0300000510.mm.1 | 0.0 | 0.991455 |
| TC4_JH584294_rand  | ENSMUST00000103852 | Gm26209 | predicted gene, 26209                           | 130887669 | 130887778 | TC0X00002967.mm.1 | 0.0 | 0.991499 |
| TC4_JH584294_rand  | NR_027900          | Snhg9   | small nucleolar RNA host gene (non-protein codi | 24719531  | 24719965  | TC1700001640.mm.1 | 0.0 | 0.991866 |
| TC4_JH584294_rand  | NR_002875          | Gm1821  | ubiquitin pseudogene                            | 62551171  | 62553213  | TC1100000801.mm.1 | 0.0 | 0.992052 |
| TC4_JH584295_rand  | ENSMUST00000089418 | Vmn1r43 | vomerolnasal 1 receptor 43                      | 89869461  | 89870529  | TC0600002705.mm.1 | 0.0 | 0.992361 |
| TCUn_GL4563720000  | ENSMUST00000082404 | mt-Td   | mitochondrially encoded tRNA aspartic acid      | 6942      | 7699      | TCOM00000007.mm.1 | 0.0 | 0.992496 |
| TCUn_GL4563850000  | NM_030682          | Tlr1    | toll-like receptor 1                            | 64924680  | 64933560  | TC0500002480.mm.1 | 0.0 | 0.992622 |
| TCUn_GL4563850000  | NM_177869          | Fam185a | family with sequence similarity 185, member A   | 21424903  | 21482124  | TC0500000172.mm.1 | 0.0 | 0.992701 |
| TCUn_JH5843040000  | NM_178619          | 1810026 | RIKEN cDNA 1810026J23 gene                      | 21592722  | 21595970  | TC0900000202.mm.1 | 0.0 | 0.992799 |
| TCX_GL456233_rand  | ENSMUST00000080474 | Olfr601 | olfactory receptor 601                          | 103358224 | 103359213 | TC0700003885.mm.1 | 0.0 | 0.992855 |
| TCX_GL456233_rand  | XM_003688923       | Gm3636  | predicted gene 3636                             | 6735685   | 6742332   | TC1400002846.mm.1 | 0.0 | 0.992877 |
| TCX_GL456233_rand  | ENSMUST00000082671 | Gm22220 | predicted gene, 22220                           | 54239238  | 54239386  | TC1200000445.mm.1 | 0.0 | 0.992998 |
| TCX_GL456233_rand  | ENSMUST00000120911 | Gm12416 | predicted gene 12416                            | 84104895  | 84105902  | TC0400000844.mm.1 | 0.0 | 0.993279 |
| TSUnmapped00000000 | ENSMUST00000079345 | Gm12715 | predicted gene 12715                            | 103563336 | 103565228 | TC0400001075.mm.1 | 0.0 | 0.993319 |
| TSUnmapped00000000 | XM_001476508       | Gm20890 | predicted gene, 20890                           | 26750801  | 26776814  | TC0Y00000292.mm.1 | 0.0 | 0.993523 |
| TSUnmapped00000000 | XM_003689034       | Gm21488 | predicted gene, 21488                           | 27495922  | 27521935  | TC0Y00000293.mm.1 | 0.0 | 0.993523 |
| TSUnmapped00000000 | NM_146827          | Olfr983 | olfactory receptor 983                          | 40092017  | 40093558  | TC0900002091.mm.1 | 0.0 | 0.99369  |
| TSUnmapped00000001 | NM_178669          | Clrn3   | clarin 3                                        | 135511456 | 135528654 | TC0700004449.mm.1 | 0.0 | 0.993995 |
| TSUnmapped00000001 | ENSMUST00000082411 | ND3     | NADH dehydrogenase subunit 3                    | 9459      | 9806      | TCOM00000011.mm.1 | 0.0 | 0.9942   |
| TSUnmapped00000001 | NR_035527          | Mir599  | microRNA 599                                    | 35660831  | 35660918  | TC1500001363.mm.1 | 0.0 | 0.994239 |
| TSUnmapped00000001 | NCBI_Gene:432701:p | Ighv6-7 | Ighv6-7 immunoglobulin heavy variable V6-7      | 114455626 | 114456083 | TC1200002597.mm.1 | 0.0 | 0.994307 |
| TSUnmapped00000002 | ENSMUST00000120197 | Gm12502 | predicted gene 12502                            | 108019885 | 108020328 | TC0300001127.mm.1 | 0.0 | 0.994478 |
| TSUnmapped00000002 | NR_035406          | Mir467a | microRNA 467a-1                                 | 10476346  | 10476418  | TC0200000109.mm.1 | 0.0 | 0.994705 |
| TSUnmapped00000002 | NR_037249          | Mir467a | microRNA 467a-2                                 | 10478798  | 10478880  | TC0200000115.mm.1 | 0.0 | 0.994705 |
| TSUnmapped00000002 | NR_037249_5        | Mir467a | microRNA 467a-4                                 | 10486135  | 10486217  | TC0200000131.mm.1 | 0.0 | 0.994705 |
| TSUnmapped00000002 | NR_037249_4        | Mir467a | microRNA 467a-4                                 | 10488599  | 10488681  | TC0200000137.mm.1 | 0.0 | 0.994705 |
| TSUnmapped00000002 | NR_037249_3        | Mir467a | microRNA 467a-4                                 | 10493510  | 10493592  | TC0200000149.mm.1 | 0.0 | 0.994705 |
| TSUnmapped00000002 | NR_037249_2        | Mir467a | microRNA 467a-4                                 | 10495980  | 10496062  | TC0200000155.mm.1 | 0.0 | 0.994705 |

|                   |                     |         |                                                 |           |           |                   |     |          |
|-------------------|---------------------|---------|-------------------------------------------------|-----------|-----------|-------------------|-----|----------|
| TSUnmapped0000002 | NR_037249           | Mir467a | microRNA 467a-2                                 | 10498393  | 10498475  | TC0200000161.mm.1 | 0.0 | 0.994705 |
| TSUnmapped0000003 | NR_037249_7         | Mir467a | microRNA 467a-4                                 | 10500822  | 10500904  | TC0200000167.mm.1 | 0.0 | 0.994705 |
| TSUnmapped0000003 | NM_008209           | Mr1     | major histocompatibility complex, class I-relat | 155127878 | 155146783 | TC0100003301.mm.1 | 0.0 | 0.994708 |
| TSUnmapped0000003 | NM_007753           | Cpa3    | carboxypeptidase A3, mast cell                  | 20215616  | 20242181  | TC0300001704.mm.1 | 0.0 | 0.994828 |
| TSUnmapped0000003 | ENSMUST00000116963  | Gm22151 | predicted gene, 22151                           | 92913132  | 92913189  | TC0800002697.mm.1 | 0.0 | 0.995243 |
| TSUnmapped0000003 | NM_001199960_4      | Ccl27a  | chemokine (C-C motif) ligand 27A                | 1718      | 3814      | TC4_JH584294_rand | 0.0 | 0.99549  |
| TSUnmapped0000003 | ENSMUST00000177717  | Gm21845 | predicted gene, 21845                           | 24381817  | 24382500  | TC0Y00000069.mm.1 | 0.0 | 0.995825 |
| TSUnmapped0000003 | ENSMUST00000179773  | Gm21791 | predicted gene, 21791                           | 25408061  | 25408744  | TC0Y00000073.mm.1 | 0.0 | 0.995825 |
| TSUnmapped0000004 | ENSMUST00000178189  | Gm21890 | predicted gene, 21890                           | 25921142  | 25921825  | TC0Y00000075.mm.1 | 0.0 | 0.995825 |
| TSUnmapped0000004 | ENSMUST00000178570  | Gm21755 | predicted gene, 21755                           | 26434218  | 26434901  | TC0Y00000077.mm.1 | 0.0 | 0.995825 |
| TSUnmapped0000004 | NM_027115           | Mapk1ip | mitogen-activated protein kinase 1 interacting  | 138835818 | 138846273 | TC0700004473.mm.1 | 0.0 | 0.995892 |
| TSUnmapped0000004 | ENSMUST00000183250  | Gm8756  | predicted gene 8756                             | 97458149  | 97459077  | TC1300002486.mm.1 | 0.0 | 0.996014 |
| TSUnmapped0000004 | NM_001166376        | Ms4a6c  | membrane-spanning 4-domains, subfamily A, m     | 11469368  | 11482197  | TC1900000221.mm.1 | 0.0 | 0.996035 |
| TSUnmapped0000005 | NM_177111           | Ccdc66  | coiled-coil domain containing 66                | 27482401  | 27508460  | TC1400001634.mm.1 | 0.0 | 0.996105 |
| TSUnmapped0000005 | NM_007406           | Adcy7   | adenylate cyclase 7                             | 88272403  | 88329962  | TC0800001031.mm.1 | 0.0 | 0.996304 |
| TSUnmapped0000006 | ENSMUST00000181421  | Gm11394 | predicted gene 11394                            | 33729033  | 33729849  | TC1300001774.mm.1 | 0.0 | 0.996402 |
| TSUnmapped0000007 | NM_011654           | Tuba1b  | tubulin, alpha 1B                               | 98931425  | 98934565  | TC1500002199.mm.1 | 0.0 | 0.996554 |
| TSUnmapped0000008 | ENSMUST00000093665  | Gm24162 | predicted gene, 24162                           | 20444811  | 20444912  | TC0100002031.mm.1 | 0.0 | 0.996574 |
| TSUnmapped0000008 | ENSMUST00000157366  | Gm25057 | predicted gene, 25057                           | 99174850  | 99174937  | TC1500002205.mm.1 | 0.0 | 0.996598 |
| TSUnmapped0000008 | ENSMUST000000182928 | Gm4960  | predicted gene 4960                             | 7399362   | 7400362   | TC0500001924.mm.1 | 0.0 | 0.99662  |
| TSUnmapped0000009 | NM_001243138        | Gm13247 | predicted gene 13247                            | 146502000 | 146539395 | TC0400004202.mm.1 | 0.0 | 0.996663 |
| TSUnmapped0000009 | NM_008766           | Slc22a6 | solute carrier family 22 (organic anion transpo | 8617996   | 8628299   | TC1900000149.mm.1 | 0.0 | 0.9967   |
| TSUnmapped0000009 | NM_009245           | Serpina | serine (or cysteine) peptidase inhibitor, clade | 103894926 | 103904950 | TC1200002534.mm.1 | 0.0 | 0.996783 |
| TSUnmapped0000009 | ENSMUST00000119785  | Rab9b-p | RAB9B, member RAS oncogene family, pseudoge     | 105482098 | 105482703 | TC0X00001058.mm.1 | 0.0 | 0.996796 |
| TSUnmapped0000010 | NM_011871           | Prkra   | protein kinase, interferon inducible double str | 76629898  | 76648015  | TC0200003805.mm.1 | 0.0 | 0.996808 |
| TSUnmapped0000010 | NM_178759           | Timd4   | T cell immunoglobulin and mucin domain contai   | 46810799  | 46844333  | TC1100000484.mm.1 | 0.0 | 0.996853 |
| TSUnmapped0000010 | ENSMUST00000169182  | Gm3756  | predicted gene 3756                             | 31936459  | 31936755  | TC0900001985.mm.1 | 0.0 | 0.996888 |
| TSUnmapped0000011 | XM_003688922        | LOC1008 | uncharacterized LOC100861657                    | 6313938   | 6352021   | TC1400001409.mm.1 | 0.0 | 0.997302 |
| TSUnmapped0000011 | ENSMUST00000122578  | Gm24185 | predicted gene, 24185                           | 90198682  | 90198786  | TC0300000782.mm.1 | 0.0 | 0.997453 |
| TSUnmapped0000011 | ENSMUST00000119418  | Gm13464 | predicted gene 13464                            | 43518464  | 43519398  | TC0200003467.mm.1 | 0.0 | 0.997484 |
| TSUnmapped0000011 | ENSMUST00000120465  | Gm11224 | predicted gene 11224                            | 69954166  | 69955276  | TC0400002846.mm.1 | 0.0 | 0.997552 |
| TSUnmapped0000011 | NM_010766           | Marco   | macrophage receptor with collagenous structure  | 120474538 | 120505084 | TC0100002967.mm.1 | 0.0 | 0.997788 |
| TSUnmapped0000012 | ENSMUST00000169661  | Gm7346  | predicted gene 7346                             | 3093369   | 3095187   | TC0800000001.mm.1 | 0.0 | 0.99798  |
| TSUnmapped0000012 | NR_039546           | Mir101c | microRNA 101c                                   | 3038669   | 3038743   | TC0900001681.mm.1 | 0.0 | 0.998032 |
| TSUnmapped0000012 | ENSMUST00000101925  | n-R5s1  | nuclear encoded rRNA 5S 1                       | 991630    | 991748    | TC0Y00000230.mm.1 | 0.0 | 0.99839  |
| TSUnmapped0000012 | NM_027436           | Mipep   | mitochondrial intermediate peptidase            | 60784566  | 60905481  | TC1400000854.mm.1 | 0.0 | 0.998396 |
| TSUnmapped0000013 | ENSMUST00000157579  | Gm23391 | predicted gene, 23391                           | 104994916 | 104995019 | TC0900001317.mm.1 | 0.0 | 0.998403 |
| TSUnmapped0000013 | ENSMUST00000119978  | Gm12671 | predicted gene 12671                            | 91851466  | 91852669  | TC0400003048.mm.1 | 0.0 | 0.998525 |
| TSUnmapped0000013 | BC094021            | Haao    | 3-hydroxyanthranilate 3,4-dioxygenase           | 83831354  | 83846790  | TC1700002637.mm.1 | 0.0 | 0.998534 |
| TSUnmapped0000013 | ENSMUST00000158270  | Gm22519 | predicted gene, 22519                           | 71794188  | 71794365  | TC1500000509.mm.1 | 0.0 | 0.998557 |
| TSUnmapped0000013 | ENSMUST00000082911  | Gm26203 | predicted gene, 26203                           | 191772721 | 191772834 | TC0100003817.mm.1 | 0.0 | 0.998703 |
| TSUnmapped0000013 | ENSMUST00000107041  | Gm3200  | predicted pseudogene 3200                       | 51746697  | 51747883  | TC0700000916.mm.1 | 0.0 | 0.99873  |
| TSUnmapped0000013 | ENSMUST00000091621  | Gm7251  | predicted pseudogene 7251                       | 49804944  | 49805952  | TC1300001965.mm.1 | 0.0 | 0.998762 |
| TSUnmapped0000014 | ENSMUST00000118343  | Gm6923  | predicted pseudogene 6923                       | 18920804  | 18921209  | TC0X00000194.mm.1 | 0.0 | 0.998768 |
| TSUnmapped0000014 | XM_001475365        | Gm20859 | predicted gene, 20859                           | 77148739  | 77149422  | TC0Y00000479.mm.1 | 0.0 | 0.998915 |
| TSUnmapped0000014 | ENSMUST00000076317  | Gm10293 | predicted pseudogene 10293                      | 52612835  | 52613836  | TC0300000382.mm.1 | 0.0 | 0.99894  |
| TSUnmapped0000014 | ENSMUST00000157427  | Gm26152 | predicted gene, 26152                           | 102856291 | 102856391 | TC0X00002759.mm.1 | 0.0 | 0.99898  |
| TSUnmapped0000014 | ENSMUST00000108740  | Gm10358 | predicted gene 10358                            | 75405334  | 75406519  | TC0800002486.mm.1 | 0.0 | 0.999153 |
| TSUnmapped0000014 | ENSMUST00000104400  | Gm24372 | predicted gene, 24372                           | 21302198  | 21302307  | TC1800000166.mm.1 | 0.0 | 0.999279 |
| TSUnmapped0000014 | ENSMUST00000157655  | Gm23584 | predicted gene, 23584                           | 48437822  | 48437950  | TC1000000440.mm.1 | 0.0 | 0.9993   |
| TSUnmapped0000014 | NR_039575           | Mir5115 | microRNA 5115                                   | 73012854  | 73012927  | TC0200003749.mm.1 | 0.0 | 0.999562 |
| TSUnmapped0000014 | ENSMUST00000071282  | Gm3222  | predicted pseudogene 3222                       | 14709066  | 14710055  | TC1700000170.mm.1 | 0.0 | 0.999573 |
| TSUnmapped0000014 | ENSMUST00000145057  | Gm10284 | predicted pseudogene 10284                      | 57550299  | 57551303  | TC0800000631.mm.1 | 0.0 | 0.999576 |
| TSUnmapped0000015 | ENSMUST00000180167  | Gm10359 | predicted gene 10359                            | 105862701 | 105863702 | TC0500002906.mm.1 | 0.0 | 0.999576 |
| TSUnmapped0000015 | ENSMUST00000165533  | Gm13292 | predicted gene 13292                            | 11409030  | 11410031  | TC0200002959.mm.1 | 0.0 | 0.999576 |
| TSUnmapped0000015 | ENSMUST00000119266  | Gm12537 | predicted gene 12537                            | 57370953  | 57371954  | TC0400002722.mm.1 | 0.0 | 0.999576 |
| TSUnmapped0000015 | ENSMUST00000099636  | Actg-ps | actin, gamma, pseudogene 1                      | 46229566  | 46229973  | TC0800000533.mm.1 | 0.0 | 0.999576 |
| TSUnmapped0000015 | ENSMUST00000106443  | Gm4609  | predicted gene 4609                             | 122230195 | 122231196 | TC0300002856.mm.1 | 0.0 | 0.999576 |
| TSUnmapped0000015 | ENSMUST00000088336  | Gm10222 | predicted gene 10222                            | 24612404  | 24612700  | TC0100002075.mm.1 | 0.0 | 0.999576 |
| TSUnmapped0000015 | uc007ams.1          | Atpase6 | ATPase subunit 6 (Atpase6) mRNA, mitochondria   | 24613971  | 24614812  | TC0100002076.mm.1 | 0.0 | 0.999576 |
| TSUnmapped0000015 | ENSMUST00000157621  | Gm25911 | predicted gene, 25911                           | 167340369 | 167340424 | TC0100003482.mm.1 | 0.0 | 0.999576 |
| TSUnmapped0000015 | uc029uih.1          | Mir1935 | microRNA 1935 (Mir1935), microRNA.              | 168690086 | 168711800 | TC0200002613.mm.1 | 0.0 | 0.999576 |
| TSUnmapped0000015 | ENSMUST00000157318  | Gm24245 | predicted gene, 24245                           | 139338304 | 139338360 | TC0400001746.mm.1 | 0.0 | 0.999576 |
| TSUnmapped0000016 | NM_007393           | Actb    | actin, beta                                     | 142903115 | 142906754 | TC0500003538.mm.1 | 0.0 | 0.999576 |
| TSUnmapped0000016 | NR_003278           | Rn18s   | 18S ribosomal RNA                               | 3180891   | 3201670   | TC0600000001.mm.1 | 0.0 | 0.999576 |
| TSUnmapped0000016 | ENSMUST00000158588  | Gm23388 | predicted gene, 23388                           | 85112012  | 85112068  | TC0800002605.mm.1 | 0.0 | 0.999576 |
| TSUnmapped0000016 | ENSMUST00000102326  | Gm24270 | predicted gene, 24270                           | 56223715  | 56223771  | TC0900002348.mm.1 | 0.0 | 0.999576 |
| TSUnmapped0000016 | ENSMUST00000082407  | ATP8    | ATP synthase F0 subunit 8                       | 7766      | 9390      | TC0M00000009.mm.1 | 0.0 | 0.999576 |
| TSUnmapped0000016 | ENSMUST00000084013  | ND4L    | NADH dehydrogenase subunit 4L                   | 9876      | 11544     | TC0M00000013.mm.1 | 0.0 | 0.999576 |
| TSUnmapped0000016 | NR_035456           | Mir1935 | microRNA 1935                                   | 85522721  | 85522780  | TC1100001295.mm.1 | 0.0 | 0.999576 |
| TSUnmapped0000016 | ENSMUST00000157984  | Gm24187 | predicted gene, 24187                           | 9834469   | 9834525   | TC1300001428.mm.1 | 0.0 | 0.999576 |
| TSUnmapped0000016 | ENSMUST00000175408  | Gm23374 | predicted gene, 23374                           | 64918222  | 64918305  | TC1600001843.mm.1 | 0.0 | 0.999576 |
| TSUnmapped0000016 | NR_003278           | Rn18s   | 18S ribosomal RNA                               | 0         | 0         | TSUnmapped0000009 | 0.0 | 0.999576 |
| TSUnmapped0000017 | NR_003279           | Rn28s1  | 28S ribosomal RNA                               | 0         | 0         | TSUnmapped0000009 | 0.0 | 0.999576 |
| TSUnmapped0000017 | NR_052008           | Rn7s2   | 7S RNA 2                                        | 0         | 0         | TSUnmapped0000013 | 0.0 | 0.999576 |
| TSUnmapped0000017 | NR_052007           | Rn7s1   | 7S RNA 1                                        | 0         | 0         | TSUnmapped0000013 | 0.0 | 0.999576 |
| TSUnmapped0000017 | NR_030687           | Rn7sk   | RNA, 7SK, nuclear                               | 0         | 0         | TSUnmapped0000017 | 0.0 | 0.999576 |
| TSUnmapped0000017 | ENSMUST00000178566  | Gm14760 | predicted gene 14760                            | 80193663  | 80194852  | TC0X00002532.mm.1 | 0.0 | 0.999577 |

|                   |                    |         |                                                 |           |           |                   |     |          |
|-------------------|--------------------|---------|-------------------------------------------------|-----------|-----------|-------------------|-----|----------|
| TSUnmapped0000017 | ENSMUST00000179006 | Gm5559  | predicted gene 5559                             | 95861708  | 95862894  | TC0500000920.mm.1 | 0.0 | 0.999578 |
| TSUnmapped0000017 | ENSMUST00000182630 | Gm2546  | predicted gene 2546                             | 89607706  | 89608696  | TC0700001268.mm.1 | 0.0 | 0.999579 |
| TSUnmapped0000017 | ENSMUST00000182372 | Gm27023 | predicted gene, 27023                           | 61781683  | 61781967  | TC1700001047.mm.1 | 0.0 | 0.999616 |
| TSUnmapped0000017 | ENSMUST00000160032 | Gm16199 | predicted gene 16199                            | 120005998 | 120006285 | TC0600001341.mm.1 | 0.0 | 0.999626 |
| TSUnmapped0000017 | NM_025557          | Pcp4l1  | Purkinje cell protein 4-like 1                  | 171173262 | 171197035 | TC0100003531.mm.1 | 0.0 | 0.999665 |
| TSUnmapped0000018 | NM_170755          | Fam134a | family with sequence similarity 134, member A   | 75142786  | 75147909  | TC0100000652.mm.1 | 0.0 | 0.999772 |
| TSUnmapped0000018 | NM_027231          | Polr2f  | polymerase (RNA) II (DNA directed) polypeptide  | 79141351  | 79151774  | TC1500000667.mm.1 | 0.0 | 0.999774 |
| TSUnmapped0000018 | NM_178738          | Prss35  | protease, serine, 35                            | 86743633  | 86758443  | TC0900001119.mm.1 | 0.0 | 0.999783 |
| TSUnmapped0000018 | ENSMUST00000183305 | Gm4654  | predicted gene 4654                             | 103370465 | 103371446 | TC1400002637.mm.1 | 0.0 | 0.999804 |
| TSUnmapped0000018 | ENSMUST00000105222 | Gm10327 | predicted pseudogene 10327                      | 33808497  | 33809498  | TC1000001987.mm.1 | 0.0 | 0.999856 |
| TSUnmapped0000018 | ENSMUST00000179228 | Gm10481 | predicted gene 10481                            | 13042247  | 13043434  | TC0500001962.mm.1 | 0.0 | 0.9999   |
| TSUnmapped0000018 | NM_009046          | Relb    | avian reticuloendotheliosis viral (v-rel) oncog | 19606217  | 19629438  | TC0700002491.mm.1 | 0.0 | 1        |
